# Supplementary material for: Hepatitis C Virus Enhances the Invasiveness of Hepatocellular Carcinoma via EGFR-Mediated Invadopodia Formation and Activation
Source: MDPI journal article supplement (doi:10.3390/cells8111395), 2019-11-05
Supplement: s1 [file s1]

## Supplementary Table 2. Literature mining of invasion- and invadopodia-related genes.

### List of invasion-associated proteins identified using ALS

| Protein name | Aliases                                                                                        | Specie       |
|--------------|------------------------------------------------------------------------------------------------|--------------|
| ptk2         | ptk2 fak pp125fak fak1                                                                         | Homo sapiens |
| myo1c        | mmi-beta myo1c mmib flj23903 myr2                                                              | Homo sapiens |
| rac1         | p21-rac1 tc-25 mgc111543 rac1 mig5                                                             | Homo sapiens |
| src          | c-src asv src src1 p60-src                                                                     | Homo sapiens |
| akr1b10      | arl-1 mgc14103 hsi akr1b11 akr1b10 akr1b12 aldrln                                              | Homo sapiens |
| itk          | mgc126257 mgc126258 emt itk lyk                                                                | Homo sapiens |
| hcc          | hcc                                                                                            | Homo sapiens |
| hsp90aa1     | flj31884 hsp90aa1 hsp89a hsp90a hsp90n hspn hspcal4 hspcal1 lap2 hsp89 hsp86 hsp90 hspca hspc1 | Homo sapiens |
| krit1        | krit1 cam ccl1                                                                                 | Homo sapiens |
| aurka        | mgc34538 aik ark1 aurka aura stk6 stk7 btak aurora2 stk15                                      | Homo sapiens |
| mtdh         | 3d3 aeg1 aeg-1 lyric mtdh                                                                      | Homo sapiens |
| akt1         | pkb-alpha rac-alpha akt akt1 rac mgc99656 prkba                                                | Homo sapiens |
| pik3ca       | pi3k mgc142161 mgc142163 pik3ca p110-alpha                                                     | Homo sapiens |
| sox3         | ghdx phpx sox3 soxb mrgh                                                                       | Homo sapiens |
| nras         | alps4 nras1 nras                                                                               | Homo sapiens |
| mmp14        | mt1-mmp mtmmp1 mmp-14 mmp-x1 mmp14                                                             | Homo sapiens |
| alpl         | hops mgc167935 flj40094 alpl flj93059 mgc161443 tnsalp ap-tnap                                 | Homo sapiens |
| vps39        | hvam6p flj46546 flj21681 vam6 vps39 kiaa0770                                                   | Homo sapiens |
| rab2a        | rab2a rab2                                                                                     | Homo sapiens |
| agfg1        | hrb rab rip mgc116940 mgc116938 dkfzp686i15205 agfg1                                           | Homo sapiens |
| hspa5        | flj26106 grp78 bip hspa5                                                                       | Homo sapiens |
| birc3        | ciap2 aip1 malt2 api2 rnf49 birc3 hiap1 mihc haip1                                             | Homo sapiens |
| frap1        | frap raft1 rapt1 frap1 frap2 mtor flj44809                                                     | Homo sapiens |
| cdkn2b       | p15 p15ink4b tp15 ink4b mts2 cdkn2b                                                            | Homo sapiens |
| met          | hgfr rccp2 c-met met auts9                                                                     | Homo sapiens |

|        |                                                                                      |              |
|--------|--------------------------------------------------------------------------------------|--------------|
| sardh  | dmgdhl1 sar sdh sard sardh flj36475                                                  | Homo sapiens |
| mzf1   | mzf1b mzf-1 zscan6 znf42 zfp98 mzf1                                                  | Homo sapiens |
| snai2  | snai2 slug1 slug mgc10182 ws2d                                                       | Homo sapiens |
| nono   | nmt55 p54nrb nrb54 nono                                                              | Homo sapiens |
| igfbp7 | igfbp7 igfbp-7v igfbp-7 mac25 igfbprp1 psf fstl2                                     | Homo sapiens |
| ptbp1  | ptb-t ptb-1 ptbp1 pptb ptb2 ptb3 ptb4 hnrpi ptb mgc10830 <br>hnrnpi hnrnp-i mgc8461  | Homo sapiens |
| il8    | monap gcp1 il-8 il8 naf gcp-1 lynap lect luct cxcl8 mdncf <br>nap1 nap-1             | Homo sapiens |
| usp21  | mgc3394 usp23 usp21                                                                  | Homo sapiens |
| xrcc1  | xrcc1 rcc                                                                            | Homo sapiens |
| vegfa  | vpf vegfa vegfa mgc70609 vegfa                                                       | Homo sapiens |
| hk2    | hkii hxx2 hk2 dkfzp686m1669                                                          | Homo sapiens |
| ptpn6  | hptp1c ptpn6 hcph shp-1 ptp-1c shp1 shp-1l sh-ptp1                                   | Homo sapiens |
| jak2   | jtk10 jak2                                                                           | Homo sapiens |
| jak1   | jak1 jtk3 jak1b jak1a                                                                | Homo sapiens |
| stat3  | hies mgc16063 flj20882 aprf stat3                                                    | Homo sapiens |
| ephb2  | pcbc mgc87492 hek5 drt erk tyro5 epht3 ephb2                                         | Homo sapiens |
| gpr160 | gpcr150 gpr160 gpcr1                                                                 | Homo sapiens |
| mapk3  | mgc20180 p44mapk hs44kdap mapk3 p44erk1 humker1a <br>erk1 prkm3                      | Homo sapiens |
| gli2   | gli2 hpe9 thp2 thp1 thp-1                                                            | Homo sapiens |
| adam10 | adam10 cd156c hst18717 kuz madm                                                      | Homo sapiens |
| mmp2   | tbe-1 clg4a clg4 mmp-ii mmp2 mona mmp-2                                              | Homo sapiens |
| timp1  | flj90373 timp1 epa hci timp-1 timp clgi                                              | Homo sapiens |
| pebp4  | pebp4 cork-1 mgc22776 cork1 gwtm1933 pro4408                                         | Homo sapiens |
| pebp1  | pebp hcnprkip pebp1                                                                  | Homo sapiens |
| ldha   | ldh-m ldha ldh1 pig19                                                                | Homo sapiens |
| myc    | c-myc bhlhe39 myc                                                                    | Homo sapiens |
| cd44   | in hcell ecmr-iii pgp1 cspg8 lhr cdw44 cd44 mgc10468 mc56 <br>mdu3 mdu2 mic4 mutch-i | Homo sapiens |

|         |                                                                               |              |
|---------|-------------------------------------------------------------------------------|--------------|
| itga6   | cd49f vla-6 itga6 flj18737 dkfzp686j01244 itga6b                              | Homo sapiens |
| twist2  | twist2 bhlha39 dermo1 mgc117334                                               | Homo sapiens |
| mmp9    | gelb clg4b mmp9 mmp-9                                                         | Homo sapiens |
| ervk2   | herv-k ervk2 polymerase                                                       | Homo sapiens |
| foxo1   | foxo1 foxo1a fkh1 fkhr                                                        | Homo sapiens |
| mapk8   | jnk21b1/2 jnk1a2 jnk mapk8 jnk1 sapk1 prkm8                                   | Homo sapiens |
| jun     | c-jun ap1 jun                                                                 | Homo sapiens |
| phpt1   | cgi-202 hspc141 ba216l13.10 dkfzp564m173 php14 phpt1                          | Homo sapiens |
| suv39h1 | suv39h suv39h1 mg44 kmt1a                                                     | Homo sapiens |
| myst2   | hbo1 hboa myst2 kat7                                                          | Homo sapiens |
| ptpn11  | mgc14433 ptp2c ptpn11 shp-2 cfc ns1 bptp3 ptp-1d shp2 sh-ptp3 sh-ptp2         | Homo sapiens |
| ifna1   | ifl ifn mgc138507 mgc138505 mgc138207 ifna@ ifna1                             | Homo sapiens |
| tspan8  | co-029 tm4sf3 tspan8                                                          | Homo sapiens |
| tp53    | trp53 flj92943 p53 tp53 lfs1                                                  | Homo sapiens |
| jmjd1a  | jmjd1 dkfzp686a24246 tsga kdm3a jhdm2a jhmd2a dkfzp686p071111 kiaa0742 jmjd1a | Homo sapiens |
| prmt5   | jbp1 ibp72 skb1 hrmt115 skb1hs prmt5                                          | Homo sapiens |
| wdr5    | swd3 big-3 wdr5                                                               | Homo sapiens |
| wdr77   | wdr77 mgc2722 hkm1069 rp11-552m11.3 nbla10071 mep50                           | Homo sapiens |
| map3k14 | hs map3k14 ftdcr1b nik hsnik                                                  | Homo sapiens |
| mirn373 | mir373 mirna373 mirn373 hsa-mir-373 mir-373                                   | Homo sapiens |
| pou3f2  | pou3f2 otf7 brn2 pouf3 oct7                                                   | Homo sapiens |
| enox2   | apk1 tnox enox2 cova1                                                         | Homo sapiens |
| cldn7   | cpetr12 cldn7 hs.84359 ceptr12 claudin-1                                      | Homo sapiens |
| msi2    | mgc3245 msi2h flj36569 msi2                                                   | Homo sapiens |
| mapk14  | rk sapk2a csbp1 csbp2 cspb1 p38 p38alpha mapk14 prkm14 prkm15 mx12 p-38 exip  | Homo sapiens |
| fzd8    | fz-8 fzd8 hfz8                                                                | Homo sapiens |
| mirn375 | mir375 mirna375 mirn375 hsa-mir-375 mir-375                                   | Homo sapiens |
| eif4e   | eif4e11 eif4e eif4e1 mgc111573                                                | Homo sapiens |

|         |                                                                                                       |              |
|---------|-------------------------------------------------------------------------------------------------------|--------------|
| EIF2C2  | EIF2C2 MG3183 AGO2 Q10                                                                                | Homo sapiens |
| UTS2R   | GPR14 UTR UTR2 UTS2R                                                                                  | Homo sapiens |
| PDCD4   | H731 MG33046 MG33047 PDCD4                                                                            | Homo sapiens |
| HOTAIR  | Hoxas flj41747 HOTAIR ncrna00072                                                                      | Homo sapiens |
| AOF2    | AOF2 KDM1 BHC110 LSD1                                                                                 | Homo sapiens |
| EZH2    | MG9169 KMT6 ENX-1 EZH2                                                                                | Homo sapiens |
| ART1    | CD296 RT6 ART2 ART1 MG133217                                                                          | Homo sapiens |
| RHOA    | ARH12 RHOA ARHA RH012 RH012                                                                           | Homo sapiens |
| SNX9    | SH3PXD3A SNX9 MST155 MSTP155 SH3PX1 WISP                                                              | Homo sapiens |
| ROS1    | C-ROS-1 ROS1 ROS MCF3                                                                                 | Homo sapiens |
| SLC2A1  | GLUT SLC2A1 DYT17 MG141896 MG141895 GLUT1 GLUT-1                                                      | Homo sapiens |
| PLAU    | PLAU ATF UPA URK U-PA UROKINASE                                                                       | Homo sapiens |
| NA      | NA NAC                                                                                                | Homo sapiens |
| AXPC1   | PCARP PCA AXPC1                                                                                       | Homo sapiens |
| LOX12   | LOX12 LOR2 WS9-14                                                                                     | Homo sapiens |
| CHEK1   | CHK1 CHEK1                                                                                            | Homo sapiens |
| BAD     | BAD BBC2 BCL2L8                                                                                       | Homo sapiens |
| Twist1  | Twist1 BPES3 BPES2 BHLHA38 SCS Twist                                                                  | Homo sapiens |
| FOXm1   | MPHOSPH2 MPP-2 HNF-3 TRIDENT HFH11 FOXm1 HFH-11 FOXm1b TGT3 INS-1 PIG29 FKH116                        | Homo sapiens |
| SMAD4   | MADH4 JIP DPC4 SMAD4                                                                                  | Homo sapiens |
| MAPK7   | MAPK7 BMK1 ERK5 PRKM7                                                                                 | Homo sapiens |
| RELA    | MG131774 RELA P65 NFKB3                                                                               | Homo sapiens |
| TLR4    | CD284 TLR4 TOLL ARMD10 HTOLL                                                                          | Homo sapiens |
| MUC4    | hsa276359 muc4                                                                                        | Homo sapiens |
| MUC1    | H23AG CD227 PEM PUM MAM6 MUC1                                                                         | Homo sapiens |
| CA9     | MN CA9 CAIX                                                                                           | Homo sapiens |
| AICDA   | AICDA AID CDA2 HIGM2                                                                                  | Homo sapiens |
| 3.5.1.4 | deaminase acylamidase 3.5.1.4 fatty acylamidase acylase amidase n-acetylaminohydrolase amidohydrolase | Homo sapiens |

|         |                                                                                                                                        |              |
|---------|----------------------------------------------------------------------------------------------------------------------------------------|--------------|
| eno3    | mse eno3                                                                                                                               | Homo sapiens |
| mlxip   | bhlhe36 mir mlxip mondoa kiaa0867                                                                                                      | Homo sapiens |
| klf5    | iklf klf5 bteb2                                                                                                                        | Homo sapiens |
| hulc    | hulc ncrna00078                                                                                                                        | Homo sapiens |
| zeb1    | areb6 zeb1 nil-2-a zfhx1a bzip zeb mgc133261 delta-ef1 <br>tcf8 zeb-1 nil-2a zfhep nil2a                                               | Homo sapiens |
| pbx3    | pbx3                                                                                                                                   | Homo sapiens |
| dcun1d1 | rp42 scro dcun1d1 dcun1l1 tes3 scro                                                                                                    | Homo sapiens |
| sfbmt1  | dkfzp434l243 sfbmt sfbmt1 ru1                                                                                                          | Homo sapiens |
| prtn3   | pr-3 acpa mbt agp7 p29 c-anca prtn3                                                                                                    | Homo sapiens |
| erbb2   | erbb2 her2 her-2 cd340 neu ngl tkr1 her-2 neu                                                                                          | Homo sapiens |
| tjp1    | dkfzp686m05161 zo-1 mgc133289 tjp1                                                                                                     | Homo sapiens |
| cox8a   | viii-l cox cox8 viii cox8a cox8l cox8-2                                                                                                | Homo sapiens |
| egfr    | erbb1 her1 mena egfr pig61 erbb                                                                                                        | Homo sapiens |
| egf     | egf homg4 urg                                                                                                                          | Homo sapiens |
| cd34    | cd34                                                                                                                                   | Homo sapiens |
| prom1   | ac133 cd133 rp41 prom1 mstp061 prom1                                                                                                   | Homo sapiens |
| kdr     | flk1 cd309 kdr vegfr vegfr2                                                                                                            | Homo sapiens |
| parp1   | parp1 parp ppol padprt-1 adprt adprt1 parp-1                                                                                           | Homo sapiens |
| 3.6.1.8 | adenosine triphosphate pyrophosphatase atpase <br>atp diphosphohydrolase [ambiguous] atp pyrophosphatase <br>3.6.1.8 atp diphosphatase | Homo sapiens |
| stim1   | gok d11s4896e stim1                                                                                                                    | Homo sapiens |
| orai1   | tmem142a flj14466 orai1 orat1 cracm1                                                                                                   | Homo sapiens |
| rhd     | mgc165007 cd240d rhdva(tt) rh30 rhii rhd diic rhxiii <br>rhk562-ii rhced rhdcl rhdclw rhpii                                            | Homo sapiens |
| actin   | actin                                                                                                                                  | Homo sapiens |
| trpv4   | trp12 trpv4 vrl-2 vroac vr-oac otrpc4 vrl2                                                                                             | Homo sapiens |
| smad2   | mgc34440 hmad-2 madh2 madr2 mgc22139 jv18 jv18-1 <br>smad2                                                                             | Homo sapiens |
| kitlg   | kitlg shep7 dkfzp686f2250 mgf scf kitl kl-1                                                                                            | Homo sapiens |

|          |                                                                                                   |              |
|----------|---------------------------------------------------------------------------------------------------|--------------|
| tnfsf13  | tall2 unq383/pro715 cd256 trdl-1 april tnfsf13 ligand                                             | Homo sapiens |
| soat1    | soat1 rp11-215i23.2 acact soat stat                                                               | Homo sapiens |
| myst1    | myst1 hmo flj14040 mof kat8                                                                       | Homo sapiens |
| yap1     | yap1 yap2 yap yki yap65                                                                           | Homo sapiens |
| rassf1   | rda32 rassf1 123f2 nore2a reh3p21 rassf1a                                                         | Homo sapiens |
| itch     | itch aif4 aip4 dj468o1.1 napp1                                                                    | Homo sapiens |
| pxn      | pxn flj16691                                                                                      | Homo sapiens |
| bcar1    | crkas cass1 p130cas cas1 bcar1                                                                    | Homo sapiens |
| ddr1     | ntrk4 ptk3a ptk3 cd167 cak ddr rtk6 nep eddr1 trke mck10 ddr1                                     | Homo sapiens |
| abl1     | v-abl c-abl abl abl1 jtk7 bcr abl p150                                                            | Homo sapiens |
| sox2     | mgc2413 sox2 anop3 mcops3                                                                         | Homo sapiens |
| setd2    | flj45883 setd2 flj46217 kiaa1732 hypb hspc069 set2 flj16420 p231hbp flj22472 hif-1 kmt3a flj23184 | Homo sapiens |
| dap      | dap mgc99796                                                                                      | Homo sapiens |
| rara     | rara rar nr1b1                                                                                    | Homo sapiens |
| cc121    | scya21 mgc34555 ec1 cc121 slc tca4 ckb9 6ckine                                                    | Homo sapiens |
| ptger4   | mgc126583 ptger4 ep4 ep4r                                                                         | Homo sapiens |
| ptgs2    | ptgs2 gripghs phs-2 cox-2 hcox-2 pghs-2                                                           | Homo sapiens |
| dbt      | e2 mgc9061 e-2 e2b dbt bcate2                                                                     | Homo sapiens |
| akt2     | pkbb akt2 rac-beta pkbbeta prkbb                                                                  | Homo sapiens |
| eed      | heed eed wait1                                                                                    | Homo sapiens |
| suz12    | kiaa0160 jjaz1 suz12 chet9                                                                        | Homo sapiens |
| vip      | mgc13587 vip phm27                                                                                | Homo sapiens |
| adcyp1   | mgc126852 adcyp1 pacap                                                                            | Homo sapiens |
| vdac1    | mgc111064 porin-31-hl vdac1 porin                                                                 | Homo sapiens |
| atp8a2   | ib atp8a2 atpib dkfzp434b1913 atp ml-1                                                            | Homo sapiens |
| postn    | pn pdlpostn periostin osf-2 rp11-412k4.1 postn mgc119511 mgc119510                                | Homo sapiens |
| mirn200b | mir-200b mirn200b mir200b                                                                         | Homo sapiens |
| cdc42    | cdc42hs cdc42 g25k                                                                                | Homo sapiens |

|         |                                                                           |              |
|---------|---------------------------------------------------------------------------|--------------|
| arhgap1 | cdc42gap arhgap1 rhogap1 rhogap p50rhogap                                 | Homo sapiens |
| il6     | il-6 hsf il6 bsf2 ifnb2                                                   | Homo sapiens |
| spp1    | eta-1 opn spp1 bspi mgc110940                                             | Homo sapiens |
| sirt1   | sir211 sirt1                                                              | Homo sapiens |
| dicer1  | herna dicer dicer1 kiaa0928                                               | Homo sapiens |
| afp     | afp hpa afp feta                                                          | Homo sapiens |
| cxcr4   | hsy3rr hm89 npyy3r cd184 d2s201e lestr lcr1 npy3r npyrl cxcr4 whim fb22   | Homo sapiens |
| apc     | gs dp2.5 apc dp3 dp2 btps2                                                | Homo sapiens |
| ifi27   | isg12a isg12 p27 fam14d ifi27                                             | Homo sapiens |
| abce1   | rnase1 rnase11 abc38 abce1 rli rns4i oabp                                 | Homo sapiens |
| decr1   | decr1 decr nadph                                                          | Homo sapiens |
| cav1    | vip21 cav-1 cav1 mstp085                                                  | Homo sapiens |
| h2afx   | h2ax h2afx h2a/x h2a.x                                                    | Homo sapiens |
| sparc   | on sparc                                                                  | Homo sapiens |
| kras    | c-k-ras rask2 ki-ras kras2 kras1 k-ras4b k-ras4a k-ras2a k-ras2b ns3 kras | Homo sapiens |
| etv1    | mgc120534 mgc120533 dkfzp78110674 mgc104699 er81 etv1                     | Homo sapiens |
| has2    | mgc126242 mgc126241 has2                                                  | Homo sapiens |
| pc-3    | pc-3 psmp                                                                 | Homo sapiens |
| arf6    | arf6 dkfzp564m0264                                                        | Homo sapiens |
| snord87 | u87 hbii-276 snord87                                                      | Homo sapiens |
| psip1   | psip1 psip2 paip mgc74712 dfs70 ledgf                                     | Homo sapiens |
| sfrs1   | sfrs1 sf2 mgc5228 srp30a sf2p33                                           | Homo sapiens |
| ifrd1   | pc4 tis7 ifrd1                                                            | Homo sapiens |
| hla-e   | hla-e ea2.1 ea1.2 mhc qa1 dkfzp686p19218 hla-6.2                          | Homo sapiens |
| il10    | mgc126451 mgc126450 il10 il-10 il10a tgif csif                            | Homo sapiens |
| fbx120  | scraper mgc15482 scr fb120 fbx120                                         | Homo sapiens |
| fpr1    | fmlp fpr1 fpr                                                             | Homo sapiens |
| plaur   | plaur cd87 upar urkr                                                      | Homo sapiens |

|          |                                                                        |              |
|----------|------------------------------------------------------------------------|--------------|
| tug1     | flj20618 ti-227h tug1 ncrna00080 mgc46067                              | Homo sapiens |
| tes      | mgc1146 tes tess tess-2 dkfzp586b2022                                  | Homo sapiens |
| pak7     | pak7 kiaa1264 mgc26232                                                 | Homo sapiens |
| cdkn1a   | cap20 p21cip1 p21 sdi1 cdkn1 cip1 mda-6 waf1 cdkn1a                    | Homo sapiens |
| il8rb    | cmkar2 cdw128b il8rb il8r2 cxcr2                                       | Homo sapiens |
| hdac1    | dkfzp686h12203 hdac1 rpd3 hd1 rpd311 gon-10                            | Homo sapiens |
| 1.4.1.20 | phd l-phenylalanine dehydrogenase phenylalanine dehydrogenase 1.4.1.20 | Homo sapiens |
| bcl9     | mgc131591 lgs bcl9                                                     | Homo sapiens |
| pygo2    | flj33226 pygo2 1190004m21rik                                           | Homo sapiens |
| lats1    | warts lats1                                                            | Homo sapiens |
| hla-g    | hla-g mhc-g                                                            | Homo sapiens |
| ctbs     | ctb ctbs                                                               | Homo sapiens |
| cd8a     | cd8alpha cd8 cd8-alpha cd8a cd8 alpha leu2                             | Homo sapiens |
| cd4      | cd4 cd4mut                                                             | Homo sapiens |
| rhob     | rhob arh6 arhb mst081 mstp081 rhoh6                                    | Homo sapiens |
| mirn19a  | mir19a mirna19a mirn19a hsa-mir-19a mir-19a                            | Homo sapiens |
| mirn187  | mirn187 mir-187                                                        | Homo sapiens |
| cd276    | cd276 b7h3 b7-h3                                                       | Homo sapiens |
| slc16a4  | slc16a4 mct4                                                           | Homo sapiens |
| cma1     | chymase cyh cma1 mct1 mgc119891 mgc119890                              | Homo sapiens |
| cltc     | hc clh-17 chc cltc cltc12 kiaa0034 chc17                               | Homo sapiens |
| cr1      | kn cr1 c3br cd35                                                       | Homo sapiens |
| lamc2    | lamnb2 b2t csf lamb2t mgc141938 mgc138491 ebr2 lamc2                   | Homo sapiens |
| cdx2     | cdx-3 cdx3 cdx2                                                        | Homo sapiens |
| lhx1     | lhx1h hpx6 homeobox hpx-6 lhx1                                         | Homo sapiens |
| ccr5     | cc-ckr-5 cmkbr5 cd195 ckr-5 ccckr5 ccr5 ckr5                           | Homo sapiens |
| ccl5     | tcp228 d17s136e mgc17164 sisd ccl5 scya5 rantes                        | Homo sapiens |
| nupr1    | nupr1 com1                                                             | Homo sapiens |



|          |                                                                                            |              |
|----------|--------------------------------------------------------------------------------------------|--------------|
| runx2    | osf2 pebp2a1 pebp2aa pebp2a2 cbfa1 runx2 mgc120023 mgc120022 ccd aml3 pea2aa ccd1 pebp2aa1 | Homo sapiens |
| ier3     | ier3 iex1 gly96 dif-2 dif2 iex-1 iex-11                                                    | Homo sapiens |
| relb     | relb irel i-rel                                                                            | Homo sapiens |
| hm13     | psl3 dj324o17.1 hm13 h13 spp psenl3 mstp086 impas                                          | Homo sapiens |
| pten     | pten1 pten bzs mmac1 mgc11227 mham                                                         | Homo sapiens |
| mirn214  | mir214 mirna214 mirn214 mir-214                                                            | Homo sapiens |
| EIF3H    | EIF3-p40 EIF3-gamma EIF3H EIF3S3 mgc102958                                                 | Homo sapiens |
| pou5f1   | otf3 otf4 pou5f1 mgc22487 oct3 oct4                                                        | Homo sapiens |
| vcp      | mgc131997 mgc148092 ibmpfd vcp tera mgc8560                                                | Homo sapiens |
| GABPA    | e4tf1a gabpa e4tf1-60 gapbalpha nrf2a nft2 nrf2 gabp-alpha                                 | Homo sapiens |
| keap1    | mgc9454 mgc11114 mgc20887 mgc4407 klhl19 mgc10630 keap1 kiaa0132 inrf2                     | Homo sapiens |
| cct4     | mgc126165 mgc126164 cct-delta srb cct4 cctd                                                | Homo sapiens |
| slc2a3   | flj90380 slc2a3 glut3                                                                      | Homo sapiens |
| sp1      | sp1 sp-1                                                                                   | Homo sapiens |
| zeb2     | zeb2 zfhx1b smadip1 kiaa0569                                                               | Homo sapiens |
| ogt      | ogt mgc22921 o-glcnaC hrnt1 flj23071                                                       | Homo sapiens |
| mgea5    | mgea5 flj11229 ncoat oga mea5 kiaa0679 flj23355                                            | Homo sapiens |
| mirn26b  | mir26b mirn26b hsa-mir-26b mir-26b                                                         | Homo sapiens |
| traf5    | rnf84 mgc:39780 traf5                                                                      | Homo sapiens |
| mirn26a1 | mirn26a1 mir26a mir26a1 mir-26a                                                            | Homo sapiens |
| atm      | mgc74674 ata atc ate atm atdc telo1 tel1 dkfzp781a0353                                     | Homo sapiens |
| s100a4   | fsp1 42a pel98 capl s100a4 18a2 p9ka                                                       | Homo sapiens |
| rassf10  | rassf10                                                                                    | Homo sapiens |
| rrm2     | rr2m rrm2                                                                                  | Homo sapiens |
| commd7   | mgc33315 flj14987 dj1085f17.3 c20orf92 commd7                                              | Homo sapiens |
| bax      | bax bcl2l4                                                                                 | Homo sapiens |
| bcl2     | bcl2 bcl-2                                                                                 | Homo sapiens |
| prkch    | pkc-l pkcl npkc-eta mgc5363 mgc26269 prkcl prkch                                           | Homo sapiens |

|         |                                                                                              |              |
|---------|----------------------------------------------------------------------------------------------|--------------|
| ednra   | eta ednra etra                                                                               | Homo sapiens |
| tfpi    | epi tfpi laci tfpi1                                                                          | Homo sapiens |
| il17a   | il17 il-17 ctla8 il17a il-17a                                                                | Homo sapiens |
| hspb1   | hmn2b dkfzp586p1322 srp27 hs.76067 cmt2f hsp28 <br>hsp27 hsp25 hspb1                         | Homo sapiens |
| ccr4    | cc-ckr-4 hgcn:14099 mgc88293 cmkbr4 cd194 k5-5 ccr4 <br>ckr4 chemr13                         | Homo sapiens |
| mmp13   | clg3 mmp-13 mmp13                                                                            | Homo sapiens |
| jag1    | cd339 ags ahd aws hj1 jag1 mgc104644 jag1                                                    | Homo sapiens |
| opcml   | opcm opcml obcam                                                                             | Homo sapiens |
| timp3   | timp3 k222 sfd timp-3 hsmrk222 k222ta2                                                       | Homo sapiens |
| adamts5 | adamts11 adamts-5 flj36738 admp-2 adamts5                                                    | Homo sapiens |
| fut1    | hh fut1 hsc                                                                                  | Homo sapiens |
| abl2    | flj31718 arg abl2 abll flj41441 flj22224                                                     | Homo sapiens |
| arg2    | arg2                                                                                         | Homo sapiens |
| rab27a  | rab27 rab27a hst18676 gs2 ram mgc117246                                                      | Homo sapiens |
| mmp11   | sl-3 stmy3 mmp11                                                                             | Homo sapiens |
| mirn145 | mir145 mirn145 mirna145 mir-145                                                              | Homo sapiens |
| ccnd1   | d11s287e ccnd1 bc11 prad1 u21b31                                                             | Homo sapiens |
| bid     | fp497 mgc15319 bid mgc42355                                                                  | Homo sapiens |
| dnmbp   | dnmbp tuba                                                                                   | Homo sapiens |
| tpt1    | flj27337 hrf p02 tctp tpt1                                                                   | Homo sapiens |
| scaf1   | sr-a1 flj00034 scaf1                                                                         | Homo sapiens |
| hspa4   | ry hs24/p52 mgc131852 hsp70ry apg-2 hsp70 hspa4                                              | Homo sapiens |
| stat6   | d12s1644 stat6c stat6b il-4-stat stat6                                                       | Homo sapiens |
| tam     | tam                                                                                          | Homo sapiens |
| tlr2    | cd282 til4 tlr2                                                                              | Homo sapiens |
| tlr1    | mgc126312 mgc126311 cd281 til dkfzp547i0610 rsc786 <br>tlr1 mgc104956 kiaa0012 dkfzp564i0682 | Homo sapiens |
| mmp15   | mt2-mmp mtmmp2 smcp-2 mmp15                                                                  | Homo sapiens |
| msc     | abf-1 abf1 bhlha22 msc myor                                                                  | Homo sapiens |

|         |                                                                              |              |
|---------|------------------------------------------------------------------------------|--------------|
| il8ra   | c-c-ckr-1 il8rba cmkar1 cd181 cd128 cdw128a c-c il8ra il8r1 cxcr1            | Homo sapiens |
| igf1r   | igfir jtk13 cd221 mgc18216 mgc142172 mgc142170 igf-1r igf1r                  | Homo sapiens |
| insr    | hhf5 cd220 insr                                                              | Homo sapiens |
| erbb4   | erbb4 her4 p180erbb4 mgc138404                                               | Homo sapiens |
| pdgfb   | flj12858 pdgfb pdgf2 c-sis sis ssv                                           | Homo sapiens |
| pdgfrb  | jtk12 pdgfrb pdgfr1 pdgf-r-beta cd140b pdgfr                                 | Homo sapiens |
| colla1  | colla1 oi4                                                                   | Homo sapiens |
| agrp    | asip2 art agrp agrp mgc118963                                                | Homo sapiens |
| art3    | flj26404 art3                                                                | Homo sapiens |
| nkd2    | naked2 nkd2                                                                  | Homo sapiens |
| fut4    | fct3a fut4 cd15 fuc-tiv elft                                                 | Homo sapiens |
| ceacam3 | cd66d cgm1 w264 w282 mgc119875 ceacam3                                       | Homo sapiens |
| ceacam5 | dkfzp781m2392 cd66e cea ceacam5                                              | Homo sapiens |
| ptx3    | ptx3 tnfaip5 tsg-14                                                          | Homo sapiens |
| cdc25c  | cdc25 cdc25c                                                                 | Homo sapiens |
| cdc2    | mgc111195 dkfzp686l20222 cdc28a cdc2 cdk1                                    | Homo sapiens |
| scrib   | crib1 vartul scrib1 scrib1 scrib                                             | Homo sapiens |
| zdhhc7  | znf370 zdhhc7 flj20279 flj10792                                              | Homo sapiens |
| hras    | n-ras rash1 c-bas/has hras c-ha-ras1 k-ras c-h-ras ctlo hras1 hamsv h-rasidx | Homo sapiens |
| paep    | gd paeg paep pp14 gdf gds pep mgc142288 mgc138509                            | Homo sapiens |
| bmp1    | pcolc pcp-2 pcp tld bmp1 flj44432                                            | Homo sapiens |
| sohlh2  | flj20449 teb1 sohlh2 ba121n13.2                                              | Homo sapiens |
| axl     | jtk11 axl ufo                                                                | Homo sapiens |
| fos     | c-fos fos ap-1                                                               | Homo sapiens |
| atf2    | hb16 mgc111558 atf-2 atf2 cre-bp1 treb7                                      | Homo sapiens |
| tmprss4 | mt-sp2 tmprss4                                                               | Homo sapiens |
| pcsk1   | pcsk1 pc1 pc3 spc3 nec1                                                      | Homo sapiens |
| nampt   | vf pbef1 pbef 1110035o14rik visfatin mgc117256                               | Homo sapiens |

|           |                                                                                              |              |
|-----------|----------------------------------------------------------------------------------------------|--------------|
|           | dkfzp666b131 nampt                                                                           |              |
| naprt1    | naprt1 pp3856                                                                                | Homo sapiens |
| pak4      | pak4                                                                                         | Homo sapiens |
| ctgf      | hcs24 igfbp8 mgc102839 ccn2 ctgf nov2                                                        | Homo sapiens |
| cc12      | mgc9434 hsmcr30 hc11 gdcf-2 cc12 mcp-1 mcaf mcp1 scya2 smc-cf                                | Homo sapiens |
| mmp1      | clg mmp1 mmp-1                                                                               | Homo sapiens |
| prame     | oip4 mape prame                                                                              | Homo sapiens |
| nf-kappab | nf-kappab nfkappab nf-kappa b nfkb nfkappa b                                                 | Homo sapiens |
| dusp4     | dusp4 hvh2 typ mkp-2 mkp2                                                                    | Homo sapiens |
| notch1    | notch-1 tan1 notch1                                                                          | Homo sapiens |
| mirn143   | mir143 mirn143 mir-143                                                                       | Homo sapiens |
| nostrin   | mgc20702 nostrin daip2                                                                       | Homo sapiens |
| mirn221   | mir221 mirna221 mirn221 mir-221                                                              | Homo sapiens |
| cyld      | flj31664 hspc057 eac mft sbs tem flj20180 cdmt uspl2 cyld mft1 kiaa0849 flj78684 cyldi cyld1 | Homo sapiens |
| irf6      | ofc6 irf6 lps pit pps vws                                                                    | Homo sapiens |
| ly96      | md2 ly96 md-2                                                                                | Homo sapiens |
| nr0b1     | ahc ahx dss gtd ahch nr0b1 dax1 dax-1 nrob1                                                  | Homo sapiens |
| col2a1    | mgc131516 col2a1 aom anh sedc col11a3                                                        | Homo sapiens |
| creb1     | mgc9284 creb1 creb                                                                           | Homo sapiens |
| cd47      | cd47 mer6                                                                                    | Homo sapiens |
| cops5     | mgc3149 jab1 sgn5 mov-34 csn5 cops5                                                          | Homo sapiens |
| wwtr1     | wwtr1 dkfzp586i1419                                                                          | Homo sapiens |
| taz       | flj27390 xap-2 lvncx efe taz cmd3a taz1 bths efe2 g4.5                                       | Homo sapiens |
| epha2     | eck epha2                                                                                    | Homo sapiens |
| mirn141   | mir141 mirn141 mir-141                                                                       | Homo sapiens |
| fas       | alps1a fas apt1 tnfrsf6 cd95 fastm apo-1 fas1                                                | Homo sapiens |
| bcl2l1    | bcl-xl/s bclx dkfzp781p2092 bcl2l1 bcl-xs bcl-xl bcl2l bcl-x                                 | Homo sapiens |
| prkaa1    | mgc33776 ampk ampka1 mgc57364 prkaa1                                                         | Homo sapiens |

|           |                                                                                   |              |
|-----------|-----------------------------------------------------------------------------------|--------------|
| aprt      | mgc125856 mgc125857 dkfzp686d13177 amp aprt <br>mgc129961                         | Homo sapiens |
| dnmt1     | dnmt1 flj16293 mcmt dnmt mgc104992 cxxc9                                          | Homo sapiens |
| hdac9     | hdac9 hdac hdrp dkfzp779k1053 hdac9fl hd7 hdac7b <br>hdac9b mitr kiaa0744         | Homo sapiens |
| prex1     | kiaa1415 p-rex1 prex1                                                             | Homo sapiens |
| cic       | cic kiaa0306                                                                      | Homo sapiens |
| tsc1      | mgc86987 lam tsc1 kiaa0243                                                        | Homo sapiens |
| slc12a3   | tsc slc12a3 flj96318 ncct                                                         | Homo sapiens |
| ing4      | p29ing4 ing4 ing-4 mgc12557 my036                                                 | Homo sapiens |
| il13      | il13 il-13 bhr1 mgc116788 mgc116789 mgc116786 p600                                | Homo sapiens |
| zfp36     | tis11 nup475 ttp gos24 zfp36 rf162a gos24                                         | Homo sapiens |
| uca1      | uca1                                                                              | Homo sapiens |
| bcatenin  | bcatenin beta catenin beta-catenin                                                | Homo sapiens |
| hmgb1     | hmgb1 hmg3 hmg1 dkfzp686a04236 sbp-1                                              | Homo sapiens |
| tmprss11d | mgc150587 mgc150588 hat tmprss11d                                                 | Homo sapiens |
| hdac8     | hdac8 hdac11                                                                      | Homo sapiens |
| hdac3     | rpd3-2 hdac3 hd3                                                                  | Homo sapiens |
| hdac2     | yaf1 hdac2                                                                        | Homo sapiens |
| mirn223   | mir223 mirna223 mirn223 mir-223                                                   | Homo sapiens |
| chrna4    | ebn bfnc chrna4 nacra4 flj95812 ebn1 nachr nachra4                                | Homo sapiens |
| trim29    | trim29 flj36085                                                                   | Homo sapiens |
| EIF2AK3   | p-erk perk hri pek dkfzp781h1925 EIF2AK3                                          | Homo sapiens |
| FGFR2     | flj98662 bfr-1 cd332 fgfr-2 bek jws fgfr2 k-sam kgfr <br>tk25 tk14 cek3 cfd1 ect1 | Homo sapiens |
| nudt6     | fgf2as fgf-as nudt6 gfg fgf-2 asfgf2 gfg-1                                        | Homo sapiens |
| sfn       | ywhas sfn                                                                         | Homo sapiens |
| PAK1      | PAK1 PAKalpha mgc130001 mgc130000                                                 | Homo sapiens |
| MACC1     | 7a5 MACC1 sh3bp41                                                                 | Homo sapiens |
| ANG       | rnase5 ang hel168 als9 mgc22466 mgc71966                                          | Homo sapiens |
| MAS1      | MAS1 MAS1 mgc119966                                                               | Homo sapiens |

|          |                                                                                              |              |
|----------|----------------------------------------------------------------------------------------------|--------------|
| ace      | cd143 ace dcp ace1 dcp1 mgc26566                                                             | Homo sapiens |
| mlc1     | vl lvm mlc mlc1 kiaa0027                                                                     | Homo sapiens |
| myh14    | kiaa2034 myh14 mhc16 dfna4 myosin flj13881 <br>fp17425 dkfzp667a1311 nmhc-ii-c flj43092      | Homo sapiens |
| pax3     | pax3 hup2 mgc120384 mgc120383 mgc120382 <br>mgc120381 mgc134778 ws1 cdhs                     | Homo sapiens |
| gfap     | flj45472 gfap                                                                                | Homo sapiens |
| pcna     | pcna mgc8367                                                                                 | Homo sapiens |
| cap1     | cap1-pen cap1                                                                                | Homo sapiens |
| twf1     | a6 ptk9 mgc41876 mgc23788 twf1                                                               | Homo sapiens |
| mirn206  | mir206 mirna206 mirn206 mir-206                                                              | Homo sapiens |
| il11     | il11 il-11 agif                                                                              | Homo sapiens |
| srf      | srf mcm1                                                                                     | Homo sapiens |
| mk11     | mrtf-a bsac mk11                                                                             | Homo sapiens |
| akr1b1   | mgc1804 adr aldr1 alr2 akr1b1                                                                | Homo sapiens |
| rps19    | dba rps19                                                                                    | Homo sapiens |
| nmt1     | nmt nmt1                                                                                     | Homo sapiens |
| mtm1     | cnm x1mtm mtm1 mtmx                                                                          | Homo sapiens |
| bpp      | pmgx bpp cbps                                                                                | Homo sapiens |
| serpinb3 | scca-pd serpinb3 t4-a scc scca-1 scca1 hst1196                                               | Homo sapiens |
| lct      | lac lct lph lph1                                                                             | Homo sapiens |
| mtss1    | mim mtss1 dkfzp781p2223 mimb mima kiaa0429 <br>flj44694                                      | Homo sapiens |
| map3k5   | ask1 mapkkk5 map3k5 mekk5                                                                    | Homo sapiens |
| myd88    | myd88 myd88d                                                                                 | Homo sapiens |
| prex2    | dep.2 depdc2 p-rex2 prex2                                                                    | Homo sapiens |
| dgcr14   | es2el es2 dgs-h dgs-i dgcr13 dgcr14 dgsi dgsh es-2                                           | Homo sapiens |
| dlc1     | arhgap7 flj21120 stard12 dlc1 p122-rhogap                                                    | Homo sapiens |
| slurp1   | mdm anup ly6ls slurp1                                                                        | Homo sapiens |
| cdkn2a   | p16ink4a ink4 arf mlm p14 p16 p19 p16ink4 cdk4i <br>cdkn2 tp16 p14arf cmm2 ink4a mts1 cdkn2a | Homo sapiens |

|          |                                                                       |              |
|----------|-----------------------------------------------------------------------|--------------|
| braf     | mgc126806 rafb1 braf braf1 flj95109 b-raf1 mgc138284                  | Homo sapiens |
| usp14    | tgt usp14                                                             | Homo sapiens |
| hccs     | dkfzp779i1858 hccs cchl mcops7                                        | Homo sapiens |
| c9orf140 | p42.3 c9orf140                                                        | Homo sapiens |
| klf4     | gklf ezf klf4                                                         | Homo sapiens |
| vav3     | flj40431 vav3                                                         | Homo sapiens |
| wnk1     | prkwk1 kdp pha2c kiaa0344 wnk1                                        | Homo sapiens |
| mirn34a  | mir34a mirna34a mirn34a mir-34a                                       | Homo sapiens |
| tgfb     | tgf-beta tgfbeta tgfb                                                 | Homo sapiens |
| sox9     | sox9 cmd1                                                             | Homo sapiens |
| hcfcl1r1 | hpiplflj20568 hcfcl1r1 mgc70711 mgc99622                              | Homo sapiens |
| pftk1    | pftaire1 pftk1 kiaa0834                                               | Homo sapiens |
| tsc2     | tsc4 tsc2 flj43106                                                    | Homo sapiens |
| capza1   | capz caz1 capza1 cappa1                                               | Homo sapiens |
| sfrp1    | frza sfrp1 sarp2 frp-1                                                | Homo sapiens |
| id1      | id id-1 id1 bhlhb24                                                   | Homo sapiens |
| nqo1     | nmori nmor1 dtd qr1 dhqu dia4 nqo1                                    | Homo sapiens |
| hbe1     | hbe1 hbe                                                              | Homo sapiens |
| hmox1    | hmox1 ho-1 bk286b10 hsp32                                             | Homo sapiens |
| dld      | gcs1 phe3 dld lad dldh                                                | Homo sapiens |
| rplp0p2  | rplp0p2 rplp0l2                                                       | Homo sapiens |
| mirn33a  | mir33a mir-33 mir33 mirn33a hsa-mir-33a mirn33 <br>hsa-mir-33 mir-33a | Homo sapiens |
| gde1     | 363e6.2 gde1 mir-16 mir16                                             | Homo sapiens |
| glipr1   | rtvp1 glipr glipr1 crisp7                                             | Homo sapiens |
| mecp2    | ppmx dkfzp686a24160 mrx16 mrx79 rts rtt autsx3 <br>mrxs13 mecp2       | Homo sapiens |
| cldn6    | cldn6                                                                 | Homo sapiens |
| prdx2    | nkefb prx2 tsa tdpx1 mgc4104 prdx2 prxii                              | Homo sapiens |
| msmb     | psp57 psp94 pn44 prps igbf mssp psp hpc13 psp-94 <br>msmb mspb        | Homo sapiens |

|          |                                                                        |              |
|----------|------------------------------------------------------------------------|--------------|
| mirn451  | mir451 mirn451 hsa-mir-451 mir-451                                     | Homo sapiens |
| atp2c1   | hspca1 pmr1 atp2c1 kiaa1347 spc-a-1 spca1 hhd atp2c1a bcpm             | Homo sapiens |
| wwp2     | wwp2-like aip2 wwp2                                                    | Homo sapiens |
| s100a8   | p8 ma387 nif l1ag caga cfag cglas 100a8 cp-10 mrp8 60b8ag              | Homo sapiens |
| socs2    | socs2 cish2 socs-2 stati2 ssi2 ssi-2 cis2                              | Homo sapiens |
| sgcb     | lgmd2e a3b sgc sgcb                                                    | Homo sapiens |
| rln2     | h2 ba12d24.1.1 ba12d24.1.2 rlxh2 rln2 h-2                              | Homo sapiens |
| tdgf1    | cripto-1 tdgf1 crgf cripto                                             | Homo sapiens |
| itgam    | cd11b mac-1 mac1a itgam mgc117044 cr3a mo1a                            | Homo sapiens |
| itgb2    | lcamb itgb2 cd18 mf17 mfi7                                             | Homo sapiens |
| itgal    | cd11a lfa-1 lfa1a itgal                                                | Homo sapiens |
| nhs      | nhs dkfzp78110254 dkfzp781f2016                                        | Homo sapiens |
| plg      | dkfzp779m0222 plg                                                      | Homo sapiens |
| mirn433  | mir433 mirn433 mirna433 hsa-mir-433 mir-433                            | Homo sapiens |
| mirn182  | mir182 mirn182 mirna182 mir-182                                        | Homo sapiens |
| nrn1     | nrn dj380b8.2 mgc44811 nrn1                                            | Homo sapiens |
| grb2     | grb2 egfrbp-grb2 ash grb3-3 mst084 mstp084                             | Homo sapiens |
| cbl      | c-cbl cbl rnf55 cbl2                                                   | Homo sapiens |
| mirn122  | mirna122a mirn122a mir122 mirn122 mirna122 mir122a hsa-mir-122 mir-122 | Homo sapiens |
| gsc      | gsc                                                                    | Homo sapiens |
| rbpj     | rbp-j rbpj rbpj suh mgc61669 kb2 igkjrb cbf1 rbpsuh igkjrb1            | Homo sapiens |
| dll1     | dll1 delta1 dll1                                                       | Homo sapiens |
| sdcbp    | st1 tacip18 sycl mda-9 sdcbp                                           | Homo sapiens |
| nanog    | nanog                                                                  | Homo sapiens |
| smad7    | crcs3 madh8 flj16482 smad7                                             | Homo sapiens |
| ski      | ski skv                                                                | Homo sapiens |
| 2.6.1.77 | tpa 2.6.1.77 taurine-pyruvate aminotransferase                         | Homo sapiens |



|          |                                                |              |
|----------|------------------------------------------------|--------------|
| tesc     | flj20607 tesc chp3                             | Homo sapiens |
| nr0b2    | shp flj17090 nr0b2                             | Homo sapiens |
| spock1   | spock tic1 testican spock1 flj37170            | Homo sapiens |
| merlk    | c-mer rp38 mer mgc133349 merlk                 | Homo sapiens |
| tyro3    | brt byk dtk rse sky tif tyro3                  | Homo sapiens |
| ppp3ca   | ppp3ca calna calna1 caln ppp2b                 | Homo sapiens |
| c16orf74 | c16orf74 mgc17624                              | Homo sapiens |
| ctcf     | ctcf                                           | Homo sapiens |
| igf2     | c11orf43 insigf igf2 flj22066 pp9974 flj44734  | Homo sapiens |
| iqgap1   | iqgap1 sar1 humorfa01 kiaa0051 p195            | Homo sapiens |
| npc1     | npc npca1 npc1                                 | Homo sapiens |
| pla2g7   | ldl-pla2 pla2g7                                | Homo sapiens |
| slc6a4   | 5-htt 5htt sert slc6a4 hsert ocd1              | Homo sapiens |
| tlr10    | mgc126398 mgc126399 cd290 tlr10 mgc104967      | Homo sapiens |
| nek3     | mgc29949 hspk36 nek3                           | Homo sapiens |
| prl      | prl                                            | Homo sapiens |
| cd38     | t10 cd38                                       | Homo sapiens |
| serpine1 | pai1 serpine1 pai planh1 pai-1                 | Homo sapiens |
| anxa4    | zap36 mgc75105 anx4 dkfzp686h02120 anxa4 pig28 | Homo sapiens |
| mmp8     | hnc clg1 pmnl-cl mmp8 mmp-8                    | Homo sapiens |
| cyr61    | igfbp10 cyr61                                  | Homo sapiens |
| pfn1     | pfn1                                           | Homo sapiens |
| cd24     | cd24a mgc75043 cd24 flj22950 flj43543          | Homo sapiens |
| nf1      | nf1 wss dkfzp686j1293 flj21220 vrnf nfns       | Homo sapiens |
| rhoc     | h9 mgc1448 rhoc mgc61427 arhc arh9 rhoh9       | Homo sapiens |
| mirn10b  | mir10b mirn10b mirna10b hsa-mir-10b mir-10b    | Homo sapiens |
| glp-1    | glp-1 flj39703 flj39511                        | Homo sapiens |
| rcbtb1   | mgc33184 rcbtb1 glp cll17 clld7 rp11-185c18.1  | Homo sapiens |
| adam9    | adam9 mltng mdc9 kiaa0021                      | Homo sapiens |

|           |                                                                           |              |
|-----------|---------------------------------------------------------------------------|--------------|
| mirn140   | mir140 mirn140 mirna140 mir-140                                           | Homo sapiens |
| mirn186   | mirn186 mir-186                                                           | Homo sapiens |
| map3k2    | mekk2b map3k2 mekk2                                                       | Homo sapiens |
| mirn107   | mirn107 mir-107                                                           | Homo sapiens |
| bdnf      | mgc34632 bdnf                                                             | Homo sapiens |
| mdm2      | hdm2 hdmx mdm2 mgc71221                                                   | Homo sapiens |
| wee1      | wee1a dkfzp686i18166 flj16446 wee1hu wee1                                 | Homo sapiens |
| tbx1      | tbx1c tga tbx1 cafs cthm vcfs dorv                                        | Homo sapiens |
| pdgfd     | pdgf-d iegf pdgfd scdgm-b mstp036 mgc26867                                | Homo sapiens |
| muc13     | flj20063 drcc1 muc13                                                      | Homo sapiens |
| muc3a     | muc3a mucin muc3                                                          | Homo sapiens |
| lect2     | mgc126628 lect2 chm2 chm-ii                                               | Homo sapiens |
| vegfc     | flt4-l vrp vegfc                                                          | Homo sapiens |
| ppa1      | pp ppa1 mgc111556 pp1 sid6-8061 ioppp                                     | Homo sapiens |
| nek2      | nek2a hspk21 nek2 nlk1                                                    | Homo sapiens |
| il6r      | cd126 il6r il-6r il-6r-1 il-6r-alpha mgc104991                            | Homo sapiens |
| foxp4     | foxp4 flj40908 hfkhl flj44184                                             | Homo sapiens |
| mfi2      | cd228 map97 mgc4856 mfi2 flj38863                                         | Homo sapiens |
| vcan      | pg-m cspg2 wgn vcan ervr wgn1 dkfzp686k06110                              | Homo sapiens |
| cd80      | cd28lg cd28lg1 cd80 lab7                                                  | Homo sapiens |
| il1b      | il-1 il1b il1f2 il1beta il1-beta il1 beta il-1 beta il-1beta              | Homo sapiens |
| mirn126   | mir126 mirn126 mirna126 mir-126                                           | Homo sapiens |
| smad3     | dkfzp586n0721 hspc193 dkfzp686j10186 mgc60396 madh3 hst17436 jv15-2 smad3 | Homo sapiens |
| ahr       | ahr                                                                       | Homo sapiens |
| cyp1a1    | cyp1a1 p450-c p450dx ahh p1-450 cp11 cyp1                                 | Homo sapiens |
| tek       | cd202b tek vmcm1 tie2 vmcm tie-2                                          | Homo sapiens |
| mirnlet7b | let-7b mirlet7b let7b hsa-let-7b mirnlet7b                                | Homo sapiens |
| e2f2      | e2f2 e2f-2                                                                | Homo sapiens |
| dclk1     | dcamk11 dcdc3a dclk kiaa0369 dclk1                                        | Homo sapiens |

|          |                                                                              |              |
|----------|------------------------------------------------------------------------------|--------------|
| ttk      | esk pyt ttk flj38280 mps111                                                  | Homo sapiens |
| mirn132  | mir132 mirn132 mirna132 mir-132                                              | Homo sapiens |
| hlf      | mgc33822 hlf                                                                 | Homo sapiens |
| foxa1    | mgc33105 hnf3a tcf3a foxa1                                                   | Homo sapiens |
| akap13   | flj11952 ha-3 ht31 proto-lb c-lbc brx lbc proto-lbc akap13 akap-lbc flj43341 | Homo sapiens |
| hpd      | hpd ppd 4hppd glod3 4-hppd                                                   | Homo sapiens |
| cda      | cda cdd                                                                      | Homo sapiens |
| slc9a1   | apnh slc9a1 flj42224 nhe1                                                    | Homo sapiens |
| hgf      | hgfb hpta hgf f-tcf                                                          | Homo sapiens |
| angptl1  | angpt3 angptl1 angy unq162 dj595c2.2 kiaa0351                                | Homo sapiens |
| egr1     | at225 ngfi-a krox-24 tis8 g0s30 zif-268 egr1 egr-1                           | Homo sapiens |
| eya1     | bor mgc141875 eya1                                                           | Homo sapiens |
| kcnn4    | hsk4 hikca1 ik1 sk4 ikca1 kca4 kcnn4 kca3.1 hkca4                            | Homo sapiens |
| tyr      | shep3 tyr oca1a ocaia                                                        | Homo sapiens |
| dyrk2    | dyrk2 flj21365 flj21217                                                      | Homo sapiens |
| mirn146b | mirna146b mir-146b mirn146b mir146b                                          | Homo sapiens |
| f9       | f9 hemb fix ptc mgc129641 mgc129642                                          | Homo sapiens |
| irak1    | irak1 irak pelle                                                             | Homo sapiens |
| gli1     | gli1 gli                                                                     | Homo sapiens |
| smo      | smo smoh                                                                     | Homo sapiens |
| shh      | hhg1 hlp3 hpe3 shh tpt tptps mcopcb5 smmci                                   | Homo sapiens |
| alcam    | cd166 alcam memd flj38514 mgc71733                                           | Homo sapiens |
| fut8     | fut8 mgc26465                                                                | Homo sapiens |
| magea4   | mgc21336 mage4 mage-x2 mage-41 magea4 mage4a mage4b                          | Homo sapiens |
| spry1    | spry1 hspry1                                                                 | Homo sapiens |
| mirn21   | mir-21 mir21 mirna21 mirn21 hsa-mir-21                                       | Homo sapiens |
| nfatc2   | nfatc2 nfat1 nfatp kiaa0611                                                  | Homo sapiens |
| mirn144  | mir144 mirn144 mir-144                                                       | Homo sapiens |

|            |                                                                 |              |
|------------|-----------------------------------------------------------------|--------------|
| vhl        | rcal vhl hrca1 vhl1                                             | Homo sapiens |
| fat        | hfat1 fat me5 cdhf7 fat1                                        | Homo sapiens |
| st7l       | flj11657 flj20284 st7l st7r stlr fam4b                          | Homo sapiens |
| mirn23a    | mir23a mirna23a mirn23a hsa-mir-23a mir-23a                     | Homo sapiens |
| etv4       | pea3 peas3 e1af e1a-f etv4                                      | Homo sapiens |
| cmtm3      | flj31762 bnas2 cklfsf3 cmtm3 mgc51956                           | Homo sapiens |
| cdk2       | cdk-2 p33(cdk2) cdk2                                            | Homo sapiens |
| adamts6    | adam-ts6 adamts6                                                | Homo sapiens |
| stk11      | pjs lkb1 stk11                                                  | Homo sapiens |
| sdhd       | pgl1 pgl sdh4 sdhd cbt1 pgl-1                                   | Homo sapiens |
| pgls       | pgls 6pgl                                                       | Homo sapiens |
| rbp2       | crbp2 rbpc2 crbp2 rbp2                                          | Homo sapiens |
| cdkn1c     | bws p57 wbs kip2 bwcr cdkn1c                                    | Homo sapiens |
| cox7a2l    | cox7a2l eb1 sig81 cox7rp cox7ar                                 | Homo sapiens |
| bap1       | dkfzp686n04275 hucep-6 hucep-13 bap1 flj35406 kiaa0272 flj37180 | Homo sapiens |
| tbx3       | tbx3-iso ums xhl tbx3                                           | Homo sapiens |
| bcs1l      | flnms bcs bjs ptd bcs1 hs.6719 h-bcs bcs1l gracile              | Homo sapiens |
| stat1      | stat91 isgf-3 stat-1 stat1 dkfzp686b04100                       | Homo sapiens |
| ephb4      | tyro11 htk myk1 ephb4                                           | Homo sapiens |
| icam1      | icam-1 bb2 icam1 p3.58 cd54                                     | Homo sapiens |
| epha1      | eph mgc163163 epht epht1 epha1                                  | Homo sapiens |
| dbp        | dbp dabp                                                        | Homo sapiens |
| ebna1bp2   | ebna1bp2 ebp2 nobp                                              | Homo sapiens |
| darc       | fy gpfy cd234 dfy gpd ccbp1 darc wbcq1                          | Homo sapiens |
| tfrc       | tfr tfr1 tfrc trfr cd71                                         | Homo sapiens |
| icam2      | cd102 icam2                                                     | Homo sapiens |
| ets2       | ets2it1 ets2                                                    | Homo sapiens |
| mirnlet7e  | let-7e mirlet7e hsa-let-7e mirnlet7e                            | Homo sapiens |
| ncrna00084 | neat1 tnrna ncrna00084                                          | Homo sapiens |

|           |                                                                                 |              |
|-----------|---------------------------------------------------------------------------------|--------------|
| tnfaip8l2 | tipe2 tnfaip8l2 flj23467                                                        | Homo sapiens |
| rhoh      | rhoh ttf arhh                                                                   | Homo sapiens |
| 6-Sep     | sept2 mgc20339 mgc16619 sep2 6-sep kiaa0128                                     | Homo sapiens |
| cdk5      | pssalre cdk5                                                                    | Homo sapiens |
| ervwe1    | herv-w herv-w-env hervw env herv-7q syncytin <br>env-w ervwe1                   | Homo sapiens |
| max       | mgc34679 max mgc36767 mgc18164 mgc10775 <br>mgc11225 bhlhd4                     | Homo sapiens |
| adsl      | asase adsl amps                                                                 | Homo sapiens |
| defb103a  | defb3 hbd3 hbp3 defb103a defb103 hbd-3 hbp-3                                    | Homo sapiens |
| cc120     | scya20 cc120 st38 larc ckb4 mip-3a                                              | Homo sapiens |
| cxcl11    | h174 scybl1 scybl9b b-r1 ip-9 ip9 cxcl11 i-tac <br>mgc102770                    | Homo sapiens |
| foxc2     | ld foxc2 mfh1 fkh114 mfh-1                                                      | Homo sapiens |
| nanogp8   | nanogp8 mgc119250                                                               | Homo sapiens |
| mirn22    | mir-22 mir22 mirn22 hsa-mir-22                                                  | Homo sapiens |
| malat1    | malat1 malat-1 neat2 pro2853 ncrna00047                                         | Homo sapiens |
| map2k1    | map2k1 mapkk1 mek1 mkk1 prkmk1                                                  | Homo sapiens |
| tgfb1     | ced tgfb1 dpd1                                                                  | Homo sapiens |
| recql     | recq1 recql recql1                                                              | Homo sapiens |
| rhag      | cd241 rh50 rhag rh2 rh50gp rh50a slc42a1                                        | Homo sapiens |
| dyrk1a    | hp86 mnbl dyrk1 mnbl dyrk dyrk1a                                                | Homo sapiens |
| tbx5      | hos tbx5                                                                        | Homo sapiens |
| cd40      | mgc9013 p50 cdw40 tnfrsf5 cd40                                                  | Homo sapiens |
| nfkbl     | mgc54151 dkfzp686c01211 ebp-1 nfkb1 kbf1 <br>nfkb-p50 nf-kappa-b p105 nfkb-p105 | Homo sapiens |
| phgdh     | pgad mgc3017 3-pgdh pdg sera phgdh 3pgdh                                        | Homo sapiens |
| mt1jp     | mt1jp mt1np mtb mt1j                                                            | Homo sapiens |
| fbn2      | cca da9 fbn2                                                                    | Homo sapiens |
| xiap      | xiap xlp2 ilp1 api3 birc4 miha                                                  | Homo sapiens |
| tacc3     | tacc3 eric1 mgc133242 mgc117382                                                 | Homo sapiens |

|          |                                                                                                                                                                                                                   |              |
|----------|-------------------------------------------------------------------------------------------------------------------------------------------------------------------------------------------------------------------|--------------|
| zhx2     | zhx2 afr1 raf kiaa0854                                                                                                                                                                                            | Homo sapiens |
| larp6    | flj11196 achn larp6                                                                                                                                                                                               | Homo sapiens |
| mirn195  | mir195 mirn195 mirna195 mir-195                                                                                                                                                                                   | Homo sapiens |
| me3      | me3 flj34862                                                                                                                                                                                                      | Homo sapiens |
| setdb2   | dkfzp761j1217 cll18 clld8 dkfzp586i0123 c13orf4 setdb2 kmt1f                                                                                                                                                      | Homo sapiens |
| ceacam1  | bgpi bgp1 ceacam1                                                                                                                                                                                                 | Homo sapiens |
| bat2     | g2 g-2 bat2 d6s51e dkfzp686d09175 d6s51                                                                                                                                                                           | Homo sapiens |
| gsn      | gsn dkfzp313l0718                                                                                                                                                                                                 | Homo sapiens |
| mirn27b  | mir27b mirna27b mirn27b mir-27b                                                                                                                                                                                   | Homo sapiens |
| mirn23b  | mir23b mirna23b mirn23b hsa-mir-23b mir-23b                                                                                                                                                                       | Homo sapiens |
| cdk6     | plstire stqtl11 cdk6 mgc59692                                                                                                                                                                                     | Homo sapiens |
| spi1     | of sfpi1 pu.1 spi-a spi-1 spi1                                                                                                                                                                                    | Homo sapiens |
| cpi1     | spi-2.3 serine protease inhibitor 2 spi-2 growth hormone-regulated proteinase inhibitor thyroid hormone-regulated protein kbp ghr-p63 cpi1 cpi-21 kallikrein-binding protein contrapsin-like protease inhibitor 1 | Homo sapiens |
| sall4    | znf797 dj1112f19.1 mgc133050 sall4 drrs hsal4                                                                                                                                                                     | Homo sapiens |
| sox1     | sox1                                                                                                                                                                                                              | Homo sapiens |
| angpt2   | angpt2 ang2 agpt2                                                                                                                                                                                                 | Homo sapiens |
| mirn100  | mirn100 mir-100                                                                                                                                                                                                   | Homo sapiens |
| rfxank   | f14150_1 rfxank bls ankra1 rfx-b mgc138628                                                                                                                                                                        | Homo sapiens |
| pik3r2   | p85-beta pik3r2 p85b                                                                                                                                                                                              | Homo sapiens |
| mirn216a | mirn216a mir216 mirna216 mirn216 mir-216                                                                                                                                                                          | Homo sapiens |
| tcf4     | pths tcf-4 itf2 bhlhb19 sef2 tcf4 mgc149723 mgc149724 sef2-1b sef2-1a e2-2 sef2-1                                                                                                                                 | Homo sapiens |
| id2      | gig8 id2h id2a id2 bhlhb26 mgc26389                                                                                                                                                                               | Homo sapiens |
| sox12    | sox12 sox22                                                                                                                                                                                                       | Homo sapiens |
| mirn25   | mir-25 mir25 mirn25 hsa-mir-25                                                                                                                                                                                    | Homo sapiens |
| rbm24    | flj26355 rbm24 dj259a10.1 rnpc6 flj37697 flj30829                                                                                                                                                                 | Homo sapiens |

|           |                                                                            |              |
|-----------|----------------------------------------------------------------------------|--------------|
| loc553103 | loc553103                                                                  | Homo sapiens |
| camp      | cramp cap18 fall-39 camp l137 hsd26 fall39 l1-37                           | Homo sapiens |
| csda      | csda1 csda dbpa zonab                                                      | Homo sapiens |
| mirn204   | mir204 mirna204 mirn204 mir-204                                            | Homo sapiens |
| lepr      | cd295 obr lepr                                                             | Homo sapiens |
| st6gal1   | st6gal1 st6gali st6gal-i mgc48859 siat1 st6n cd75                          | Homo sapiens |
| timp2     | timp2 timp-2 csc-21k                                                       | Homo sapiens |
| cdkn1b    | p27kip1 cdkn4 kip1 men4 men1b cdkn1b                                       | Homo sapiens |
| il34      | c16orf77 mgc34647 il34 il-34                                               | Homo sapiens |
| mrc1      | cd206 clec13d mmr mrc1                                                     | Homo sapiens |
| csf1r     | csf1r c-fms cd115 fms csfr fim2                                            | Homo sapiens |
| cd68      | cd68 scard1 dkfzp686m18236 gp110                                           | Homo sapiens |
| lef1      | tcf1alpha lef1 dkfzp586h0919                                               | Homo sapiens |
| hpse      | hpse hse1 hpa hpse1                                                        | Homo sapiens |
| slamf7    | slamf7 cracc 19a cd319                                                     | Homo sapiens |
| gata4     | mgc126629 gata4                                                            | Homo sapiens |
| ppm1h     | kiaa1157 flj13253 arhc1 urcc2 ppm1h                                        | Homo sapiens |
| znf395    | dkfzp434k1210 hdbp2 znf395 prf-1 si-1-8-14                                 | Homo sapiens |
| app       | abeta aaa ad1 app abpp pn2 appi ctfgamma cvap                              | Homo sapiens |
| tarbp2    | trbp tarbp2 loqs trbp2 trbp1                                               | Homo sapiens |
| tar       | tar                                                                        | Homo sapiens |
| hoxa7     | antp hox1a hoxa7 hox1.1                                                    | Homo sapiens |
| mitf      | mi bhlhe32 mitf                                                            | Homo sapiens |
| hnf4a     | hnf4 hnf4a tcf14 tcf hnf4a9 hnf4a8 hnf4a7 nr2a1 mody nr2a21 flj39654 mody1 | Homo sapiens |
| phb2      | pnas-141 phb2 bap rea mgc117268 bap37 bcap37                               | Homo sapiens |
| wnt5a     | hwnt5a wnt5a                                                               | Homo sapiens |
| ulbp2     | n2dl2 ulbp2 raet1h                                                         | Homo sapiens |
| mia       | mia cd-rap                                                                 | Homo sapiens |

|          |                                                                                                                                                                                                                                                                                                                                                                                                      |              |
|----------|------------------------------------------------------------------------------------------------------------------------------------------------------------------------------------------------------------------------------------------------------------------------------------------------------------------------------------------------------------------------------------------------------|--------------|
| hmga1    | hmga1 hmg-r hmgly hmga1a mgc4854 <br>mgc4242 mgc12816                                                                                                                                                                                                                                                                                                                                                | Homo sapiens |
| il24     | il24 il-24 il10b c49a st16 mda-7 mda7 <br>mob-5 fisp                                                                                                                                                                                                                                                                                                                                                 | Homo sapiens |
| mirn222  | mir222 mirna222 mirn222 mir-222                                                                                                                                                                                                                                                                                                                                                                      | Homo sapiens |
| ppp2r2a  | mgc52248 flj26613 b55a b55-alpha pr55a <br>pr52a ppp2r2a                                                                                                                                                                                                                                                                                                                                             | Homo sapiens |
| fosl2    | fra2 fosl2 flj23306                                                                                                                                                                                                                                                                                                                                                                                  | Homo sapiens |
| fosl1    | fra1 fosl1 fra fra-1                                                                                                                                                                                                                                                                                                                                                                                 | Homo sapiens |
| fosb     | fosb gosb gos3 mgc42291 dkfzp686c0818 g0s3                                                                                                                                                                                                                                                                                                                                                           | Homo sapiens |
| jund     | jund                                                                                                                                                                                                                                                                                                                                                                                                 | Homo sapiens |
| junb     | junb                                                                                                                                                                                                                                                                                                                                                                                                 | Homo sapiens |
| stat5a   | stat5a stat5                                                                                                                                                                                                                                                                                                                                                                                         | Homo sapiens |
| 4.1.2.13 | 4.1.2.13 ketose 1-phosphate aldolase <br>phosphofructaldolase 1,6-diphosphofructose<br>aldolase diphosphofructose aldolase fructose<br>1,6-diphosphate aldolase fructoaldolase aldolase <br>fructose 1-phosphate aldolase fructose-<br>bisphosphate aldolase fructose-1,6-bisphosphate<br>triosephosphate-lyase zymohexase fructose diphosphate<br>aldolase smaldo fructose 1-monophosphate aldolase | Homo sapiens |
| ctd      | ctd                                                                                                                                                                                                                                                                                                                                                                                                  | Homo sapiens |
| rhce     | rh rhce rhpi rhvi rh4 rhe rhviii rh30a rhivb(j) <br>cd240ce rhixb mgc103977                                                                                                                                                                                                                                                                                                                          | Homo sapiens |
| trap     | trap                                                                                                                                                                                                                                                                                                                                                                                                 | Homo sapiens |
| nos2     | inos hep-nos nos2a nos2                                                                                                                                                                                                                                                                                                                                                                              | Homo sapiens |
| phactr4  | flj13171 mgc20618 dkfzp686l07205 mgc34186 <br>phactr4                                                                                                                                                                                                                                                                                                                                                | Homo sapiens |
| ddx6     | hlr2 p54 rck ddx6 flj36338                                                                                                                                                                                                                                                                                                                                                                           | Homo sapiens |
| anxa1    | anx1 anxa1 lpc1                                                                                                                                                                                                                                                                                                                                                                                      | Homo sapiens |
| smug1    | hmudg fdg ung3 mgc104370 smug1                                                                                                                                                                                                                                                                                                                                                                       | Homo sapiens |
| maml1    | f18 cxorf6 maml1 f-18                                                                                                                                                                                                                                                                                                                                                                                | Homo sapiens |
| dym      | flj90130 dmc dym smc flj20071                                                                                                                                                                                                                                                                                                                                                                        | Homo sapiens |





## List of invasion-related publications identified using ALS

| Source | Target | PubMed entry                                                                                                                                                                                                                                                                                                                                                                                                                                                                                                                                                                                                                                                                                                                                                                                                                                 |
|--------|--------|----------------------------------------------------------------------------------------------------------------------------------------------------------------------------------------------------------------------------------------------------------------------------------------------------------------------------------------------------------------------------------------------------------------------------------------------------------------------------------------------------------------------------------------------------------------------------------------------------------------------------------------------------------------------------------------------------------------------------------------------------------------------------------------------------------------------------------------------|
| ptk2   | zeb1   | <a href="http://www.ncbi.nlm.nih.gov/entrez/query.fcgi?cmd=Retrieve&amp;db=pubmed&amp;dopt=Abstract&amp;list_uids=27286256">http://www.ncbi.nlm.nih.gov/entrez/query.fcgi?cmd=Retrieve&amp;db=pubmed&amp;dopt=Abstract&amp;list_uids=27286256</a>  6 Oncotarget  Jun 2016 JOURNAL ARTICLE                                                                                                                                                                                                                                                                                                                                                                                                                                                                                                                                                    |
| ptk2   | tjp1   | <a href="http://www.ncbi.nlm.nih.gov/entrez/query.fcgi?cmd=Retrieve&amp;db=pubmed&amp;dopt=Abstract&amp;list_uids=27286256">http://www.ncbi.nlm.nih.gov/entrez/query.fcgi?cmd=Retrieve&amp;db=pubmed&amp;dopt=Abstract&amp;list_uids=27286256</a>  6 Oncotarget  Jun 2016 JOURNAL ARTICLE                                                                                                                                                                                                                                                                                                                                                                                                                                                                                                                                                    |
| ptk2   | cldn7  | <a href="http://www.ncbi.nlm.nih.gov/entrez/query.fcgi?cmd=Retrieve&amp;db=pubmed&amp;dopt=Abstract&amp;list_uids=27286256">http://www.ncbi.nlm.nih.gov/entrez/query.fcgi?cmd=Retrieve&amp;db=pubmed&amp;dopt=Abstract&amp;list_uids=27286256</a>  6 Oncotarget  Jun 2016 JOURNAL ARTICLE                                                                                                                                                                                                                                                                                                                                                                                                                                                                                                                                                    |
| ptk2   | ddr1   | <a href="http://www.ncbi.nlm.nih.gov/entrez/query.fcgi?cmd=Retrieve&amp;db=pubmed&amp;dopt=Abstract&amp;list_uids=27293031">http://www.ncbi.nlm.nih.gov/entrez/query.fcgi?cmd=Retrieve&amp;db=pubmed&amp;dopt=Abstract&amp;list_uids=27293031</a>  6 Sci Rep 6  2016 Journal Article                                                                                                                                                                                                                                                                                                                                                                                                                                                                                                                                                         |
| ptk2   | abl1   | <a href="http://www.ncbi.nlm.nih.gov/entrez/query.fcgi?cmd=Retrieve&amp;db=pubmed&amp;dopt=Abstract&amp;list_uids=27293031">http://www.ncbi.nlm.nih.gov/entrez/query.fcgi?cmd=Retrieve&amp;db=pubmed&amp;dopt=Abstract&amp;list_uids=27293031</a>  6 Sci Rep 6  2016 Journal Article                                                                                                                                                                                                                                                                                                                                                                                                                                                                                                                                                         |
| ptk2   | pxn    | <a href="http://www.ncbi.nlm.nih.gov/entrez/query.fcgi?cmd=Retrieve&amp;db=pubmed&amp;dopt=Abstract&amp;list_uids=27293031">http://www.ncbi.nlm.nih.gov/entrez/query.fcgi?cmd=Retrieve&amp;db=pubmed&amp;dopt=Abstract&amp;list_uids=27293031</a>  6 Sci Rep 6  2016 Journal Article                                                                                                                                                                                                                                                                                                                                                                                                                                                                                                                                                         |
| ptk2   | kdr    | <a href="http://www.ncbi.nlm.nih.gov/entrez/query.fcgi?cmd=Retrieve&amp;db=pubmed&amp;dopt=Abstract&amp;list_uids=27297262">http://www.ncbi.nlm.nih.gov/entrez/query.fcgi?cmd=Retrieve&amp;db=pubmed&amp;dopt=Abstract&amp;list_uids=27297262</a>  6 Clin Exp Pharmacol Physiol 43 10 Oct 2016 Journal Article                                                                                                                                                                                                                                                                                                                                                                                                                                                                                                                               |
| ptk2   | fbx120 | <a href="http://www.ncbi.nlm.nih.gov/entrez/query.fcgi?cmd=Retrieve&amp;db=pubmed&amp;dopt=Abstract&amp;list_uids=27322511">http://www.ncbi.nlm.nih.gov/entrez/query.fcgi?cmd=Retrieve&amp;db=pubmed&amp;dopt=Abstract&amp;list_uids=27322511</a>  6 Environ Toxicol  Jun 2016 JOURNAL ARTICLE                                                                                                                                                                                                                                                                                                                                                                                                                                                                                                                                               |
| ptk2   | ephb2  | <a href="http://www.ncbi.nlm.nih.gov/entrez/query.fcgi?cmd=Retrieve&amp;db=pubmed&amp;dopt=Abstract&amp;list_uids=27322511">http://www.ncbi.nlm.nih.gov/entrez/query.fcgi?cmd=Retrieve&amp;db=pubmed&amp;dopt=Abstract&amp;list_uids=27322511</a>  6 Environ Toxicol  Jun 2016 JOURNAL ARTICLE                                                                                                                                                                                                                                                                                                                                                                                                                                                                                                                                               |
| ptk2   | rhoa   | <a href="http://www.ncbi.nlm.nih.gov/entrez/query.fcgi?cmd=Retrieve&amp;db=pubmed&amp;dopt=Abstract&amp;list_uids=27330411">http://www.ncbi.nlm.nih.gov/entrez/query.fcgi?cmd=Retrieve&amp;db=pubmed&amp;dopt=Abstract&amp;list_uids=27330411</a>  6 Cancer Cell Int 16  2016 Journal Article                                                                                                                                                                                                                                                                                                                                                                                                                                                                                                                                                |
| ptk2   | rac1   | <a href="http://www.ncbi.nlm.nih.gov/entrez/query.fcgi?cmd=Retrieve&amp;db=pubmed&amp;dopt=Abstract&amp;list_uids=27330411">http://www.ncbi.nlm.nih.gov/entrez/query.fcgi?cmd=Retrieve&amp;db=pubmed&amp;dopt=Abstract&amp;list_uids=27330411</a>  6 Cancer Cell Int 16  2016 Journal Article  <a href="http://www.ncbi.nlm.nih.gov/entrez/query.fcgi?cmd=Retrieve&amp;db=pubmed&amp;dopt=Abstract&amp;list_uids=27248472">http://www.ncbi.nlm.nih.gov/entrez/query.fcgi?cmd=Retrieve&amp;db=pubmed&amp;dopt=Abstract&amp;list_uids=27248472</a>  6 Oncotarget  May 2016 JOURNAL ARTICLE                                                                                                                                                                                                                                                     |
| ptk2   | pdgfb  | <a href="http://www.ncbi.nlm.nih.gov/entrez/query.fcgi?cmd=Retrieve&amp;db=pubmed&amp;dopt=Abstract&amp;list_uids=27374103">http://www.ncbi.nlm.nih.gov/entrez/query.fcgi?cmd=Retrieve&amp;db=pubmed&amp;dopt=Abstract&amp;list_uids=27374103</a>  6 Oncotarget  Jun 2016 JOURNAL ARTICLE                                                                                                                                                                                                                                                                                                                                                                                                                                                                                                                                                    |
| ptk2   | grb2   | <a href="http://www.ncbi.nlm.nih.gov/entrez/query.fcgi?cmd=Retrieve&amp;db=pubmed&amp;dopt=Abstract&amp;list_uids=27472394">http://www.ncbi.nlm.nih.gov/entrez/query.fcgi?cmd=Retrieve&amp;db=pubmed&amp;dopt=Abstract&amp;list_uids=27472394</a>  6 Oncotarget  Jul 2016 JOURNAL ARTICLE                                                                                                                                                                                                                                                                                                                                                                                                                                                                                                                                                    |
| ptk2   | src    | <a href="http://www.ncbi.nlm.nih.gov/entrez/query.fcgi?cmd=Retrieve&amp;db=pubmed&amp;dopt=Abstract&amp;list_uids=27322511">http://www.ncbi.nlm.nih.gov/entrez/query.fcgi?cmd=Retrieve&amp;db=pubmed&amp;dopt=Abstract&amp;list_uids=27322511</a>  6 Environ Toxicol  Jun 2016 JOURNAL ARTICLE  <a href="http://www.ncbi.nlm.nih.gov/entrez/query.fcgi?cmd=Retrieve&amp;db=pubmed&amp;dopt=Abstract&amp;list_uids=27472394">http://www.ncbi.nlm.nih.gov/entrez/query.fcgi?cmd=Retrieve&amp;db=pubmed&amp;dopt=Abstract&amp;list_uids=27472394</a>  6 Oncotarget  Jul 2016 JOURNAL ARTICLE  <a href="http://www.ncbi.nlm.nih.gov/entrez/query.fcgi?cmd=Retrieve&amp;db=pubmed&amp;dopt=Abstract&amp;list_uids=27297262">http://www.ncbi.nlm.nih.gov/entrez/query.fcgi?cmd=Retrieve&amp;db=pubmed&amp;dopt=Abstract&amp;list_uids=27297262</a> |

|       |        |                                                                                                                                                                                                                                                                                                                                                                                                                                                                 |
|-------|--------|-----------------------------------------------------------------------------------------------------------------------------------------------------------------------------------------------------------------------------------------------------------------------------------------------------------------------------------------------------------------------------------------------------------------------------------------------------------------|
|       |        | 6 Clin Exp Pharmacol Physiol 43 10 Oct 2016 Journal Article http://www.ncbi.nlm.nih.gov/entrez/query.fcgi?cmd=Retrieve&db=pubmed&dopt=Abstract&list_uids=27248472 6 Oncotarget  May 2016 JOURNAL ARTICLE http://www.ncbi.nlm.nih.gov/entrez/query.fcgi?cmd=Retrieve&db=pubmed&dopt=Abstract&list_uids=27422337 6 Bioorg Med Chem Lett 26 16 Aug 2016 Journal Article                                                                                            |
| ptk2  | frap1  | http://www.ncbi.nlm.nih.gov/entrez/query.fcgi?cmd=Retrieve&db=pubmed&dopt=Abstract&list_uids=27491275 6 Matrix Biol  Aug 2016 REVIEW, JOURNAL ARTICLE                                                                                                                                                                                                                                                                                                           |
| ptk2  | pik3ca | http://www.ncbi.nlm.nih.gov/entrez/query.fcgi?cmd=Retrieve&db=pubmed&dopt=Abstract&list_uids=27491275 6 Matrix Biol  Aug 2016 REVIEW, JOURNAL ARTICLE                                                                                                                                                                                                                                                                                                           |
| ptk2  | akt1   | http://www.ncbi.nlm.nih.gov/entrez/query.fcgi?cmd=Retrieve&db=pubmed&dopt=Abstract&list_uids=27297262 6 Clin Exp Pharmacol Physiol 43 10 Oct 2016 Journal Article http://www.ncbi.nlm.nih.gov/entrez/query.fcgi?cmd=Retrieve&db=pubmed&dopt=Abstract&list_uids=27491275 6 Matrix Biol  Aug 2016 REVIEW, JOURNAL ARTICLE http://www.ncbi.nlm.nih.gov/entrez/query.fcgi?cmd=Retrieve&db=pubmed&dopt=Abstract&list_uids=27605043 6 Sci Rep 6  2016 Journal Article |
| ptk2  | stat5a | http://www.ncbi.nlm.nih.gov/entrez/query.fcgi?cmd=Retrieve&db=pubmed&dopt=Abstract&list_uids=27605043 6 Sci Rep 6  2016 Journal Article                                                                                                                                                                                                                                                                                                                         |
| myo1c | ptk2   | http://www.ncbi.nlm.nih.gov/entrez/query.fcgi?cmd=Retrieve&db=pubmed&dopt=Abstract&list_uids=27246739 6 Biochem Biophys Res Commun 476 4 Aug 2016 Journal Article                                                                                                                                                                                                                                                                                               |
| rac1  | arf6   | http://www.ncbi.nlm.nih.gov/entrez/query.fcgi?cmd=Retrieve&db=pubmed&dopt=Abstract&list_uids=27320871 6 Nan Fang Yi Ke Da Xue Xue Bao 36 6 Jun 2016 English Abstract, Journal Article, Research Support, Non-U.S. Gov't                                                                                                                                                                                                                                         |
| rac1  | cdc42  | http://www.ncbi.nlm.nih.gov/entrez/query.fcgi?cmd=Retrieve&db=pubmed&dopt=Abstract&list_uids=27418645 6 Mol Cancer Res  Jul 2016 JOURNAL ARTICLE http://www.ncbi.nlm.nih.gov/entrez/query.fcgi?cmd=Retrieve&db=pubmed&dopt=Abstract&list_uids=27340868 6 Oncotarget  Jun 2016 JOURNAL ARTICLE                                                                                                                                                                   |
| rac1  | akt1   | http://www.ncbi.nlm.nih.gov/entrez/query.fcgi?cmd=Retrieve&db=pubmed&dopt=Abstract&list_uids=27320871 6 Nan Fang Yi Ke Da Xue Xue Bao 36 6 Jun 2016 English Abstract, Journal Article, Research Support, Non-U.S. Gov't http://www.ncbi.nlm.nih.gov/entrez/query.fcgi?cmd=Retrieve&db=pubmed&dopt=Abstract&list_uids=27453460 6 Pancreatology  Jul 2016 JOURNAL ARTICLE                                                                                         |
| rac1  | vegfa  | http://www.ncbi.nlm.nih.gov/entrez/query.fcgi?cmd=Retrieve&db=pubmed&dopt=Abstract&list_uids=27556698 6 Oncotarget  Aug 2016 JOURNAL ARTICLE                                                                                                                                                                                                                                                                                                                    |
| src   | rac1   | http://www.ncbi.nlm.nih.gov/entrez/query.fcgi?cmd=Retrieve&db=pubmed&dopt=Abstract&list_uids=27248472 6 Oncotarget  May 2016 JOURNAL ARTICLE                                                                                                                                                                                                                                                                                                                    |
| src   | egfr   | http://www.ncbi.nlm.nih.gov/entrez/query.fcgi?cmd=Retrieve&db=pubmed&dopt=Abstract&list_uids=27286795 6 Neuro Oncol  Jun 2016 JOURNAL ARTICLE                                                                                                                                                                                                                                                                                                                   |
| src   | kdr    | http://www.ncbi.nlm.nih.gov/entrez/query.fcgi?cmd=Retrieve&db=pubmed&dopt=Abstract&list_uids=27297262 6 Clin Exp                                                                                                                                                                                                                                                                                                                                                |

|         |         |                                                                                                                                                                                                                                                                                                                |
|---------|---------|----------------------------------------------------------------------------------------------------------------------------------------------------------------------------------------------------------------------------------------------------------------------------------------------------------------|
|         |         | Pharmacol Physiol 43 10 Oct 2016 Journal Article                                                                                                                                                                                                                                                               |
| src     | akt1    | <a href="http://www.ncbi.nlm.nih.gov/entrez/query.fcgi?cmd=Retrieve&amp;db=pubmed&amp;dopt=Abstract&amp;list_uids=27297262">http://www.ncbi.nlm.nih.gov/entrez/query.fcgi?cmd=Retrieve&amp;db=pubmed&amp;dopt=Abstract&amp;list_uids=27297262</a>  6 Clin Exp Pharmacol Physiol 43 10 Oct 2016 Journal Article |
| src     | ephb2   | <a href="http://www.ncbi.nlm.nih.gov/entrez/query.fcgi?cmd=Retrieve&amp;db=pubmed&amp;dopt=Abstract&amp;list_uids=27322511">http://www.ncbi.nlm.nih.gov/entrez/query.fcgi?cmd=Retrieve&amp;db=pubmed&amp;dopt=Abstract&amp;list_uids=27322511</a>  6 Environ Toxicol   Jun 2016 JOURNAL ARTICLE                |
| src     | grb2    | <a href="http://www.ncbi.nlm.nih.gov/entrez/query.fcgi?cmd=Retrieve&amp;db=pubmed&amp;dopt=Abstract&amp;list_uids=27472394">http://www.ncbi.nlm.nih.gov/entrez/query.fcgi?cmd=Retrieve&amp;db=pubmed&amp;dopt=Abstract&amp;list_uids=27472394</a>  6 Oncotarget   Jul 2016 JOURNAL ARTICLE                     |
| src     | smad3   | <a href="http://www.ncbi.nlm.nih.gov/entrez/query.fcgi?cmd=Retrieve&amp;db=pubmed&amp;dopt=Abstract&amp;list_uids=27519288">http://www.ncbi.nlm.nih.gov/entrez/query.fcgi?cmd=Retrieve&amp;db=pubmed&amp;dopt=Abstract&amp;list_uids=27519288</a>  6 Toxicology 366-367  Aug 2016 JOURNAL ARTICLE              |
| src     | ahr     | <a href="http://www.ncbi.nlm.nih.gov/entrez/query.fcgi?cmd=Retrieve&amp;db=pubmed&amp;dopt=Abstract&amp;list_uids=27519288">http://www.ncbi.nlm.nih.gov/entrez/query.fcgi?cmd=Retrieve&amp;db=pubmed&amp;dopt=Abstract&amp;list_uids=27519288</a>  6 Toxicology 366-367  Aug 2016 JOURNAL ARTICLE              |
| src     | pik3ca  | <a href="http://www.ncbi.nlm.nih.gov/entrez/query.fcgi?cmd=Retrieve&amp;db=pubmed&amp;dopt=Abstract&amp;list_uids=27609774">http://www.ncbi.nlm.nih.gov/entrez/query.fcgi?cmd=Retrieve&amp;db=pubmed&amp;dopt=Abstract&amp;list_uids=27609774</a>  6 FASEB J   Sep 2016 JOURNAL ARTICLE                        |
| akr1b10 | rac1    | <a href="http://www.ncbi.nlm.nih.gov/entrez/query.fcgi?cmd=Retrieve&amp;db=pubmed&amp;dopt=Abstract&amp;list_uids=27248472">http://www.ncbi.nlm.nih.gov/entrez/query.fcgi?cmd=Retrieve&amp;db=pubmed&amp;dopt=Abstract&amp;list_uids=27248472</a>  6 Oncotarget   May 2016 JOURNAL ARTICLE                     |
| akr1b10 | src     | <a href="http://www.ncbi.nlm.nih.gov/entrez/query.fcgi?cmd=Retrieve&amp;db=pubmed&amp;dopt=Abstract&amp;list_uids=27248472">http://www.ncbi.nlm.nih.gov/entrez/query.fcgi?cmd=Retrieve&amp;db=pubmed&amp;dopt=Abstract&amp;list_uids=27248472</a>  6 Oncotarget   May 2016 JOURNAL ARTICLE                     |
| akr1b10 | ptk2    | <a href="http://www.ncbi.nlm.nih.gov/entrez/query.fcgi?cmd=Retrieve&amp;db=pubmed&amp;dopt=Abstract&amp;list_uids=27248472">http://www.ncbi.nlm.nih.gov/entrez/query.fcgi?cmd=Retrieve&amp;db=pubmed&amp;dopt=Abstract&amp;list_uids=27248472</a>  6 Oncotarget   May 2016 JOURNAL ARTICLE                     |
| itk     | foxm1   | <a href="http://www.ncbi.nlm.nih.gov/entrez/query.fcgi?cmd=Retrieve&amp;db=pubmed&amp;dopt=Abstract&amp;list_uids=27279287">http://www.ncbi.nlm.nih.gov/entrez/query.fcgi?cmd=Retrieve&amp;db=pubmed&amp;dopt=Abstract&amp;list_uids=27279287</a>  6 Oncol Rep 36 2 Aug 2016 Journal Article                   |
| itk     | dcun1d1 | <a href="http://www.ncbi.nlm.nih.gov/entrez/query.fcgi?cmd=Retrieve&amp;db=pubmed&amp;dopt=Abstract&amp;list_uids=27285984">http://www.ncbi.nlm.nih.gov/entrez/query.fcgi?cmd=Retrieve&amp;db=pubmed&amp;dopt=Abstract&amp;list_uids=27285984</a>  6 Oncotarget   Jun 2016 JOURNAL ARTICLE                     |
| itk     | sfmbt1  | <a href="http://www.ncbi.nlm.nih.gov/entrez/query.fcgi?cmd=Retrieve&amp;db=pubmed&amp;dopt=Abstract&amp;list_uids=27285984">http://www.ncbi.nlm.nih.gov/entrez/query.fcgi?cmd=Retrieve&amp;db=pubmed&amp;dopt=Abstract&amp;list_uids=27285984</a>  6 Oncotarget   Jun 2016 JOURNAL ARTICLE                     |
| itk     | vegfa   | <a href="http://www.ncbi.nlm.nih.gov/entrez/query.fcgi?cmd=Retrieve&amp;db=pubmed&amp;dopt=Abstract&amp;list_uids=27307601">http://www.ncbi.nlm.nih.gov/entrez/query.fcgi?cmd=Retrieve&amp;db=pubmed&amp;dopt=Abstract&amp;list_uids=27307601</a>  6 Mol Cancer Ther 15 9 Sep 2016 Journal Article             |
| itk     | pcsk1   | <a href="http://www.ncbi.nlm.nih.gov/entrez/query.fcgi?cmd=Retrieve&amp;db=pubmed&amp;dopt=Abstract&amp;list_uids=27385093">http://www.ncbi.nlm.nih.gov/entrez/query.fcgi?cmd=Retrieve&amp;db=pubmed&amp;dopt=Abstract&amp;list_uids=27385093</a>  6 Oncotarget   Jul 2016 JOURNAL ARTICLE                     |
| itk     | plau    | <a href="http://www.ncbi.nlm.nih.gov/entrez/query.fcgi?cmd=Retrieve&amp;db=pubmed&amp;dopt=Abstract&amp;list_uids=27385093">http://www.ncbi.nlm.nih.gov/entrez/query.fcgi?cmd=Retrieve&amp;db=pubmed&amp;dopt=Abstract&amp;list_uids=27385093</a>  6 Oncotarget   Jul 2016 JOURNAL ARTICLE                     |
| itk     | jun     | <a href="http://www.ncbi.nlm.nih.gov/entrez/query.fcgi?cmd=Retrieve&amp;db=pubmed&amp;dopt=Abstract&amp;list_uids=27385093">http://www.ncbi.nlm.nih.gov/entrez/query.fcgi?cmd=Retrieve&amp;db=pubmed&amp;dopt=Abstract&amp;list_uids=27385093</a>  6 Oncotarget   Jul 2016 JOURNAL ARTICLE                     |
| itk     | fos     | <a href="http://www.ncbi.nlm.nih.gov/entrez/query.fcgi?cmd=Retrieve&amp;db=pubmed&amp;dopt=Abstract&amp;list_uids=27385093">http://www.ncbi.nlm.nih.gov/entrez/query.fcgi?cmd=Retrieve&amp;db=pubmed&amp;dopt=Abstract&amp;list_uids=27385093</a>  6 Oncotarget   Jul 2016 JOURNAL ARTICLE                     |

|     |          |                                                                                                                                                                                                                                                                                                                                                                                                                                                                                                                                                                                                                                                                                                                                                                                                                                                                                                                                                                                                                                                                                                                                                                                                                                                                                                                                                                                                                                                                                                         |
|-----|----------|---------------------------------------------------------------------------------------------------------------------------------------------------------------------------------------------------------------------------------------------------------------------------------------------------------------------------------------------------------------------------------------------------------------------------------------------------------------------------------------------------------------------------------------------------------------------------------------------------------------------------------------------------------------------------------------------------------------------------------------------------------------------------------------------------------------------------------------------------------------------------------------------------------------------------------------------------------------------------------------------------------------------------------------------------------------------------------------------------------------------------------------------------------------------------------------------------------------------------------------------------------------------------------------------------------------------------------------------------------------------------------------------------------------------------------------------------------------------------------------------------------|
| itk | bcatenin | <a href="http://www.ncbi.nlm.nih.gov/entrez/query.fcgi?cmd=Retrieve&amp;db=pubmed&amp;dopt=Abstract&amp;list_uids=27424981">http://www.ncbi.nlm.nih.gov/entrez/query.fcgi?cmd=Retrieve&amp;db=pubmed&amp;dopt=Abstract&amp;list_uids=27424981</a>  6 Eur Rev Med Pharmacol Sci 20 13 Jul 2016 Journal Article                                                                                                                                                                                                                                                                                                                                                                                                                                                                                                                                                                                                                                                                                                                                                                                                                                                                                                                                                                                                                                                                                                                                                                                           |
| itk | rela     | <a href="http://www.ncbi.nlm.nih.gov/entrez/query.fcgi?cmd=Retrieve&amp;db=pubmed&amp;dopt=Abstract&amp;list_uids=27430890">http://www.ncbi.nlm.nih.gov/entrez/query.fcgi?cmd=Retrieve&amp;db=pubmed&amp;dopt=Abstract&amp;list_uids=27430890</a>  6 Oncol Rep 36 3 Sep 2016 Journal Article                                                                                                                                                                                                                                                                                                                                                                                                                                                                                                                                                                                                                                                                                                                                                                                                                                                                                                                                                                                                                                                                                                                                                                                                            |
| itk | tgfb     | <a href="http://www.ncbi.nlm.nih.gov/entrez/query.fcgi?cmd=Retrieve&amp;db=pubmed&amp;dopt=Abstract&amp;list_uids=27457505">http://www.ncbi.nlm.nih.gov/entrez/query.fcgi?cmd=Retrieve&amp;db=pubmed&amp;dopt=Abstract&amp;list_uids=27457505</a>  6 Sci Rep 6   2016 Journal Article                                                                                                                                                                                                                                                                                                                                                                                                                                                                                                                                                                                                                                                                                                                                                                                                                                                                                                                                                                                                                                                                                                                                                                                                                   |
| itk | zeb2     | <a href="http://www.ncbi.nlm.nih.gov/entrez/query.fcgi?cmd=Retrieve&amp;db=pubmed&amp;dopt=Abstract&amp;list_uids=27470974">http://www.ncbi.nlm.nih.gov/entrez/query.fcgi?cmd=Retrieve&amp;db=pubmed&amp;dopt=Abstract&amp;list_uids=27470974</a>  6 Nat Commun 7   2016 Journal Article  <a href="http://www.ncbi.nlm.nih.gov/entrez/query.fcgi?cmd=Retrieve&amp;db=pubmed&amp;dopt=Abstract&amp;list_uids=27347142">http://www.ncbi.nlm.nih.gov/entrez/query.fcgi?cmd=Retrieve&amp;db=pubmed&amp;dopt=Abstract&amp;list_uids=27347142</a>  6 Oncol Lett 12 1 Jul 2016 JOURNAL ARTICLE  <a href="http://www.ncbi.nlm.nih.gov/entrez/query.fcgi?cmd=Retrieve&amp;db=pubmed&amp;dopt=Abstract&amp;list_uids=27453416">http://www.ncbi.nlm.nih.gov/entrez/query.fcgi?cmd=Retrieve&amp;db=pubmed&amp;dopt=Abstract&amp;list_uids=27453416</a>  6 Indian J Cancer 52 Suppl 3  Dec 2015 Journal Article                                                                                                                                                                                                                                                                                                                                                                                                                                                                                                                                                                                                      |
| itk | ros1     | <a href="http://www.ncbi.nlm.nih.gov/entrez/query.fcgi?cmd=Retrieve&amp;db=pubmed&amp;dopt=Abstract&amp;list_uids=27481258">http://www.ncbi.nlm.nih.gov/entrez/query.fcgi?cmd=Retrieve&amp;db=pubmed&amp;dopt=Abstract&amp;list_uids=27481258</a>  6 Lasers Med Sci   Aug 2016 JOURNAL ARTICLE                                                                                                                                                                                                                                                                                                                                                                                                                                                                                                                                                                                                                                                                                                                                                                                                                                                                                                                                                                                                                                                                                                                                                                                                          |
| itk | mmp9     | <a href="http://www.ncbi.nlm.nih.gov/entrez/query.fcgi?cmd=Retrieve&amp;db=pubmed&amp;dopt=Abstract&amp;list_uids=27481258">http://www.ncbi.nlm.nih.gov/entrez/query.fcgi?cmd=Retrieve&amp;db=pubmed&amp;dopt=Abstract&amp;list_uids=27481258</a>  6 Lasers Med Sci   Aug 2016 JOURNAL ARTICLE                                                                                                                                                                                                                                                                                                                                                                                                                                                                                                                                                                                                                                                                                                                                                                                                                                                                                                                                                                                                                                                                                                                                                                                                          |
| itk | mmp2     | <a href="http://www.ncbi.nlm.nih.gov/entrez/query.fcgi?cmd=Retrieve&amp;db=pubmed&amp;dopt=Abstract&amp;list_uids=27481258">http://www.ncbi.nlm.nih.gov/entrez/query.fcgi?cmd=Retrieve&amp;db=pubmed&amp;dopt=Abstract&amp;list_uids=27481258</a>  6 Lasers Med Sci   Aug 2016 JOURNAL ARTICLE                                                                                                                                                                                                                                                                                                                                                                                                                                                                                                                                                                                                                                                                                                                                                                                                                                                                                                                                                                                                                                                                                                                                                                                                          |
| itk | tbx1     | <a href="http://www.ncbi.nlm.nih.gov/entrez/query.fcgi?cmd=Retrieve&amp;db=pubmed&amp;dopt=Abstract&amp;list_uids=27503928">http://www.ncbi.nlm.nih.gov/entrez/query.fcgi?cmd=Retrieve&amp;db=pubmed&amp;dopt=Abstract&amp;list_uids=27503928</a>  6 Cancer Res   Aug 2016 JOURNAL ARTICLE                                                                                                                                                                                                                                                                                                                                                                                                                                                                                                                                                                                                                                                                                                                                                                                                                                                                                                                                                                                                                                                                                                                                                                                                              |
| itk | met      | <a href="http://www.ncbi.nlm.nih.gov/entrez/query.fcgi?cmd=Retrieve&amp;db=pubmed&amp;dopt=Abstract&amp;list_uids=27530187">http://www.ncbi.nlm.nih.gov/entrez/query.fcgi?cmd=Retrieve&amp;db=pubmed&amp;dopt=Abstract&amp;list_uids=27530187</a>  6 Hepatology   Aug 2016 JOURNAL ARTICLE                                                                                                                                                                                                                                                                                                                                                                                                                                                                                                                                                                                                                                                                                                                                                                                                                                                                                                                                                                                                                                                                                                                                                                                                              |
| itk | zeb1     | <a href="http://www.ncbi.nlm.nih.gov/entrez/query.fcgi?cmd=Retrieve&amp;db=pubmed&amp;dopt=Abstract&amp;list_uids=27533463">http://www.ncbi.nlm.nih.gov/entrez/query.fcgi?cmd=Retrieve&amp;db=pubmed&amp;dopt=Abstract&amp;list_uids=27533463</a>  6 Oncotarget   Aug 2016 JOURNAL ARTICLE  <a href="http://www.ncbi.nlm.nih.gov/entrez/query.fcgi?cmd=Retrieve&amp;db=pubmed&amp;dopt=Abstract&amp;list_uids=27315462">http://www.ncbi.nlm.nih.gov/entrez/query.fcgi?cmd=Retrieve&amp;db=pubmed&amp;dopt=Abstract&amp;list_uids=27315462</a>  6 Cell Cycle 15 18 Sep 2016 Journal Article  <a href="http://www.ncbi.nlm.nih.gov/entrez/query.fcgi?cmd=Retrieve&amp;db=pubmed&amp;dopt=Abstract&amp;list_uids=27500490">http://www.ncbi.nlm.nih.gov/entrez/query.fcgi?cmd=Retrieve&amp;db=pubmed&amp;dopt=Abstract&amp;list_uids=27500490</a>  6 J Clin Invest 126 9 Sep 2016 Journal Article  <a href="http://www.ncbi.nlm.nih.gov/entrez/query.fcgi?cmd=Retrieve&amp;db=pubmed&amp;dopt=Abstract&amp;list_uids=27285757">http://www.ncbi.nlm.nih.gov/entrez/query.fcgi?cmd=Retrieve&amp;db=pubmed&amp;dopt=Abstract&amp;list_uids=27285757</a>  6 Oncotarget   Jun 2016 JOURNAL ARTICLE  <a href="http://www.ncbi.nlm.nih.gov/entrez/query.fcgi?cmd=Retrieve&amp;db=pubmed&amp;dopt=Abstract&amp;list_uids=27520310">http://www.ncbi.nlm.nih.gov/entrez/query.fcgi?cmd=Retrieve&amp;db=pubmed&amp;dopt=Abstract&amp;list_uids=27520310</a>  6 J Cancer Res Clin Oncol 142 10 Oct 2016 Journal Article |
| hcc | mmp2     | <a href="http://www.ncbi.nlm.nih.gov/entrez/query.fcgi?cmd=Retrieve&amp;db=pubmed&amp;dopt=Abstract&amp;list_uids=27348267">http://www.ncbi.nlm.nih.gov/entrez/query.fcgi?cmd=Retrieve&amp;db=pubmed&amp;dopt=Abstract&amp;list_uids=27348267</a>  6 Oncogenesis 5 6  2016 Journal Article  <a href="http://www.ncbi.nlm.nih.gov/entrez/query.fcgi?cmd=Retrieve&amp;db=pubmed&amp;dopt=Abstract&amp;list_uids=27266355">http://www.ncbi.nlm.nih.gov/entrez/query.fcgi?cmd=Retrieve&amp;db=pubmed&amp;dopt=Abstract&amp;list_uids=27266355</a>  6 Zhonghua Yi Xue Za Zhi 96 18 May 2016 English Abstract,Journal Article,Research Support, Non-U.S. Gov't                                                                                                                                                                                                                                                                                                                                                                                                                                                                                                                                                                                                                                                                                                                                                                                                                                                |

|          |        |                                                                                                                                                                                                                                                                                                                                                                                                                                                                                                                                                                                                                                                                                                                                                                                                                                                                                                                                                                                                                                                                                                                                                                                 |
|----------|--------|---------------------------------------------------------------------------------------------------------------------------------------------------------------------------------------------------------------------------------------------------------------------------------------------------------------------------------------------------------------------------------------------------------------------------------------------------------------------------------------------------------------------------------------------------------------------------------------------------------------------------------------------------------------------------------------------------------------------------------------------------------------------------------------------------------------------------------------------------------------------------------------------------------------------------------------------------------------------------------------------------------------------------------------------------------------------------------------------------------------------------------------------------------------------------------|
| hcc      | mapk14 | <a href="http://www.ncbi.nlm.nih.gov/entrez/query.fcgi?cmd=Retrieve&amp;db=pubmed&amp;dopt=Abstract&amp;list_uids=27348267">http://www.ncbi.nlm.nih.gov/entrez/query.fcgi?cmd=Retrieve&amp;db=pubmed&amp;dopt=Abstract&amp;list_uids=27348267</a>  6 Oncogenesis 5 6 2016 JOURNAL ARTICLE                                                                                                                                                                                                                                                                                                                                                                                                                                                                                                                                                                                                                                                                                                                                                                                                                                                                                       |
| hcc      | sp1    | <a href="http://www.ncbi.nlm.nih.gov/entrez/query.fcgi?cmd=Retrieve&amp;db=pubmed&amp;dopt=Abstract&amp;list_uids=27416558">http://www.ncbi.nlm.nih.gov/entrez/query.fcgi?cmd=Retrieve&amp;db=pubmed&amp;dopt=Abstract&amp;list_uids=27416558</a>  6 Biomed Pharmacother 83 Jul 2016 JOURNAL ARTICLE                                                                                                                                                                                                                                                                                                                                                                                                                                                                                                                                                                                                                                                                                                                                                                                                                                                                            |
| hcc      | prkaa1 | <a href="http://www.ncbi.nlm.nih.gov/entrez/query.fcgi?cmd=Retrieve&amp;db=pubmed&amp;dopt=Abstract&amp;list_uids=27416558">http://www.ncbi.nlm.nih.gov/entrez/query.fcgi?cmd=Retrieve&amp;db=pubmed&amp;dopt=Abstract&amp;list_uids=27416558</a>  6 Biomed Pharmacother 83 Jul 2016 JOURNAL ARTICLE                                                                                                                                                                                                                                                                                                                                                                                                                                                                                                                                                                                                                                                                                                                                                                                                                                                                            |
| hcc      | aprt   | <a href="http://www.ncbi.nlm.nih.gov/entrez/query.fcgi?cmd=Retrieve&amp;db=pubmed&amp;dopt=Abstract&amp;list_uids=27416558">http://www.ncbi.nlm.nih.gov/entrez/query.fcgi?cmd=Retrieve&amp;db=pubmed&amp;dopt=Abstract&amp;list_uids=27416558</a>  6 Biomed Pharmacother 83 Jul 2016 JOURNAL ARTICLE                                                                                                                                                                                                                                                                                                                                                                                                                                                                                                                                                                                                                                                                                                                                                                                                                                                                            |
| hcc      | ros1   | <a href="http://www.ncbi.nlm.nih.gov/entrez/query.fcgi?cmd=Retrieve&amp;db=pubmed&amp;dopt=Abstract&amp;list_uids=27416558">http://www.ncbi.nlm.nih.gov/entrez/query.fcgi?cmd=Retrieve&amp;db=pubmed&amp;dopt=Abstract&amp;list_uids=27416558</a>  6 Biomed Pharmacother 83 Jul 2016 JOURNAL ARTICLE                                                                                                                                                                                                                                                                                                                                                                                                                                                                                                                                                                                                                                                                                                                                                                                                                                                                            |
| hcc      | dnmt1  | <a href="http://www.ncbi.nlm.nih.gov/entrez/query.fcgi?cmd=Retrieve&amp;db=pubmed&amp;dopt=Abstract&amp;list_uids=27416558">http://www.ncbi.nlm.nih.gov/entrez/query.fcgi?cmd=Retrieve&amp;db=pubmed&amp;dopt=Abstract&amp;list_uids=27416558</a>  6 Biomed Pharmacother 83 Jul 2016 JOURNAL ARTICLE                                                                                                                                                                                                                                                                                                                                                                                                                                                                                                                                                                                                                                                                                                                                                                                                                                                                            |
| hcc      | sox9   | <a href="http://www.ncbi.nlm.nih.gov/entrez/query.fcgi?cmd=Retrieve&amp;db=pubmed&amp;dopt=Abstract&amp;list_uids=27457505">http://www.ncbi.nlm.nih.gov/entrez/query.fcgi?cmd=Retrieve&amp;db=pubmed&amp;dopt=Abstract&amp;list_uids=27457505</a>  6 Sci Rep 6  2016 JOURNAL ARTICLE                                                                                                                                                                                                                                                                                                                                                                                                                                                                                                                                                                                                                                                                                                                                                                                                                                                                                            |
| hcc      | ccl2   | <a href="http://www.ncbi.nlm.nih.gov/entrez/query.fcgi?cmd=Retrieve&amp;db=pubmed&amp;dopt=Abstract&amp;list_uids=27486225">http://www.ncbi.nlm.nih.gov/entrez/query.fcgi?cmd=Retrieve&amp;db=pubmed&amp;dopt=Abstract&amp;list_uids=27486225</a>  6 Mol Cancer Ther   Aug 2016 JOURNAL ARTICLE                                                                                                                                                                                                                                                                                                                                                                                                                                                                                                                                                                                                                                                                                                                                                                                                                                                                                 |
| hcc      | vegfa  | <a href="http://www.ncbi.nlm.nih.gov/entrez/query.fcgi?cmd=Retrieve&amp;db=pubmed&amp;dopt=Abstract&amp;list_uids=27461244">http://www.ncbi.nlm.nih.gov/entrez/query.fcgi?cmd=Retrieve&amp;db=pubmed&amp;dopt=Abstract&amp;list_uids=27461244</a>  6 Oncol Rep 36 3 Sep 2016 Journal Article  <a href="http://www.ncbi.nlm.nih.gov/entrez/query.fcgi?cmd=Retrieve&amp;db=pubmed&amp;dopt=Abstract&amp;list_uids=27507763">http://www.ncbi.nlm.nih.gov/entrez/query.fcgi?cmd=Retrieve&amp;db=pubmed&amp;dopt=Abstract&amp;list_uids=27507763</a>  6 Sci Rep 6  2016 JOURNAL ARTICLE                                                                                                                                                                                                                                                                                                                                                                                                                                                                                                                                                                                              |
| hcc      | kdr    | <a href="http://www.ncbi.nlm.nih.gov/entrez/query.fcgi?cmd=Retrieve&amp;db=pubmed&amp;dopt=Abstract&amp;list_uids=27507763">http://www.ncbi.nlm.nih.gov/entrez/query.fcgi?cmd=Retrieve&amp;db=pubmed&amp;dopt=Abstract&amp;list_uids=27507763</a>  6 Sci Rep 6  2016 JOURNAL ARTICLE                                                                                                                                                                                                                                                                                                                                                                                                                                                                                                                                                                                                                                                                                                                                                                                                                                                                                            |
| hcc      | met    | <a href="http://www.ncbi.nlm.nih.gov/entrez/query.fcgi?cmd=Retrieve&amp;db=pubmed&amp;dopt=Abstract&amp;list_uids=27530187">http://www.ncbi.nlm.nih.gov/entrez/query.fcgi?cmd=Retrieve&amp;db=pubmed&amp;dopt=Abstract&amp;list_uids=27530187</a>  6 Hepatology   Aug 2016 JOURNAL ARTICLE                                                                                                                                                                                                                                                                                                                                                                                                                                                                                                                                                                                                                                                                                                                                                                                                                                                                                      |
| hcc      | itk    | <a href="http://www.ncbi.nlm.nih.gov/entrez/query.fcgi?cmd=Retrieve&amp;db=pubmed&amp;dopt=Abstract&amp;list_uids=27391793">http://www.ncbi.nlm.nih.gov/entrez/query.fcgi?cmd=Retrieve&amp;db=pubmed&amp;dopt=Abstract&amp;list_uids=27391793</a>  6 Hepatol Res   Feb 2016 JOURNAL ARTICLE  <a href="http://www.ncbi.nlm.nih.gov/entrez/query.fcgi?cmd=Retrieve&amp;db=pubmed&amp;dopt=Abstract&amp;list_uids=27248828">http://www.ncbi.nlm.nih.gov/entrez/query.fcgi?cmd=Retrieve&amp;db=pubmed&amp;dopt=Abstract&amp;list_uids=27248828</a>  6 Oncotarget   May 2016 JOURNAL ARTICLE  <a href="http://www.ncbi.nlm.nih.gov/entrez/query.fcgi?cmd=Retrieve&amp;db=pubmed&amp;dopt=Abstract&amp;list_uids=27285757">http://www.ncbi.nlm.nih.gov/entrez/query.fcgi?cmd=Retrieve&amp;db=pubmed&amp;dopt=Abstract&amp;list_uids=27285757</a>  6 Oncotarget   Jun 2016 JOURNAL ARTICLE  <a href="http://www.ncbi.nlm.nih.gov/entrez/query.fcgi?cmd=Retrieve&amp;db=pubmed&amp;dopt=Abstract&amp;list_uids=27530187">http://www.ncbi.nlm.nih.gov/entrez/query.fcgi?cmd=Retrieve&amp;db=pubmed&amp;dopt=Abstract&amp;list_uids=27530187</a>  6 Hepatology   Aug 2016 JOURNAL ARTICLE |
| hsp90aa1 | itk    | <a href="http://www.ncbi.nlm.nih.gov/entrez/query.fcgi?cmd=Retrieve&amp;db=pubmed&amp;dopt=Abstract&amp;list_uids=27248828">http://www.ncbi.nlm.nih.gov/entrez/query.fcgi?cmd=Retrieve&amp;db=pubmed&amp;dopt=Abstract&amp;list_uids=27248828</a>  6 Oncotarget   May 2016 JOURNAL ARTICLE                                                                                                                                                                                                                                                                                                                                                                                                                                                                                                                                                                                                                                                                                                                                                                                                                                                                                      |
| hsp90aa1 | vegfa  | <a href="http://www.ncbi.nlm.nih.gov/entrez/query.fcgi?cmd=Retrieve&amp;db=pubmed&amp;dopt=Abstract&amp;list_uids=27494878">http://www.ncbi.nlm.nih.gov/entrez/query.fcgi?cmd=Retrieve&amp;db=pubmed&amp;dopt=Abstract&amp;list_uids=27494878</a>  6 Oncotarget   Aug 2016 JOURNAL ARTICLE                                                                                                                                                                                                                                                                                                                                                                                                                                                                                                                                                                                                                                                                                                                                                                                                                                                                                      |

|          |         |                                                                                                                                                                                                                                                                                                                                                                                                                                                                                                                                                                                              |
|----------|---------|----------------------------------------------------------------------------------------------------------------------------------------------------------------------------------------------------------------------------------------------------------------------------------------------------------------------------------------------------------------------------------------------------------------------------------------------------------------------------------------------------------------------------------------------------------------------------------------------|
| hsp90aa1 | stat3   | <a href="http://www.ncbi.nlm.nih.gov/entrez/query.fcgi?cmd=Retrieve&amp;db=pubmed&amp;dopt=Abstract&amp;list_uids=27494878">http://www.ncbi.nlm.nih.gov/entrez/query.fcgi?cmd=Retrieve&amp;db=pubmed&amp;dopt=Abstract&amp;list_uids=27494878</a>  6 Oncotarget  Aug 2016 JOURNAL ARTICLE                                                                                                                                                                                                                                                                                                    |
| hsp90aa1 | rac1    | <a href="http://www.ncbi.nlm.nih.gov/entrez/query.fcgi?cmd=Retrieve&amp;db=pubmed&amp;dopt=Abstract&amp;list_uids=27575453">http://www.ncbi.nlm.nih.gov/entrez/query.fcgi?cmd=Retrieve&amp;db=pubmed&amp;dopt=Abstract&amp;list_uids=27575453</a>  6 Peptides 85  Aug 2016 JOURNAL ARTICLE                                                                                                                                                                                                                                                                                                   |
| aurka    | krit1   | <a href="http://www.ncbi.nlm.nih.gov/entrez/query.fcgi?cmd=Retrieve&amp;db=pubmed&amp;dopt=Abstract&amp;list_uids=27250762">http://www.ncbi.nlm.nih.gov/entrez/query.fcgi?cmd=Retrieve&amp;db=pubmed&amp;dopt=Abstract&amp;list_uids=27250762</a>  6 Target Oncol  Jun 2016 JOURNAL ARTICLE                                                                                                                                                                                                                                                                                                  |
| mtdh     | akt2    | <a href="http://www.ncbi.nlm.nih.gov/entrez/query.fcgi?cmd=Retrieve&amp;db=pubmed&amp;dopt=Abstract&amp;list_uids=27308476">http://www.ncbi.nlm.nih.gov/entrez/query.fcgi?cmd=Retrieve&amp;db=pubmed&amp;dopt=Abstract&amp;list_uids=27308476</a>  6 Mol Cell Oncol 2 3  2015 Journal Article                                                                                                                                                                                                                                                                                                |
| mtdh     | akt1    | <a href="http://www.ncbi.nlm.nih.gov/entrez/query.fcgi?cmd=Retrieve&amp;db=pubmed&amp;dopt=Abstract&amp;list_uids=27251589">http://www.ncbi.nlm.nih.gov/entrez/query.fcgi?cmd=Retrieve&amp;db=pubmed&amp;dopt=Abstract&amp;list_uids=27251589</a>  6 Sci Rep 6   2016 Journal Article  <a href="http://www.ncbi.nlm.nih.gov/entrez/query.fcgi?cmd=Retrieve&amp;db=pubmed&amp;dopt=Abstract&amp;list_uids=27308476">http://www.ncbi.nlm.nih.gov/entrez/query.fcgi?cmd=Retrieve&amp;db=pubmed&amp;dopt=Abstract&amp;list_uids=27308476</a>  6 Mol Cell Oncol 2 3  2015 Journal Article         |
| mtdh     | itk     | <a href="http://www.ncbi.nlm.nih.gov/entrez/query.fcgi?cmd=Retrieve&amp;db=pubmed&amp;dopt=Abstract&amp;list_uids=27571703">http://www.ncbi.nlm.nih.gov/entrez/query.fcgi?cmd=Retrieve&amp;db=pubmed&amp;dopt=Abstract&amp;list_uids=27571703</a>  6 Oncol Rep  Aug 2016 JOURNAL ARTICLE                                                                                                                                                                                                                                                                                                     |
| akt1     | nras    | <a href="http://www.ncbi.nlm.nih.gov/entrez/query.fcgi?cmd=Retrieve&amp;db=pubmed&amp;dopt=Abstract&amp;list_uids=27251789">http://www.ncbi.nlm.nih.gov/entrez/query.fcgi?cmd=Retrieve&amp;db=pubmed&amp;dopt=Abstract&amp;list_uids=27251789</a>  6 J Invest Dermatol  May 2016 JOURNAL ARTICLE                                                                                                                                                                                                                                                                                             |
| akt1     | akt2    | <a href="http://www.ncbi.nlm.nih.gov/entrez/query.fcgi?cmd=Retrieve&amp;db=pubmed&amp;dopt=Abstract&amp;list_uids=27302072">http://www.ncbi.nlm.nih.gov/entrez/query.fcgi?cmd=Retrieve&amp;db=pubmed&amp;dopt=Abstract&amp;list_uids=27302072</a>  6 J Cell Biochem  Jun 2016 JOURNAL ARTICLE  <a href="http://www.ncbi.nlm.nih.gov/entrez/query.fcgi?cmd=Retrieve&amp;db=pubmed&amp;dopt=Abstract&amp;list_uids=27308476">http://www.ncbi.nlm.nih.gov/entrez/query.fcgi?cmd=Retrieve&amp;db=pubmed&amp;dopt=Abstract&amp;list_uids=27308476</a>  6 Mol Cell Oncol 2 3  2015 Journal Article |
| akt1     | arf6    | <a href="http://www.ncbi.nlm.nih.gov/entrez/query.fcgi?cmd=Retrieve&amp;db=pubmed&amp;dopt=Abstract&amp;list_uids=27320871">http://www.ncbi.nlm.nih.gov/entrez/query.fcgi?cmd=Retrieve&amp;db=pubmed&amp;dopt=Abstract&amp;list_uids=27320871</a>  6 Nan Fang Yi Ke Da Xue Xue Bao 36 6 Jun 2016 English Abstract,Journal Article,Research Support, Non-U.S. Gov't                                                                                                                                                                                                                           |
| akt1     | pak7    | <a href="http://www.ncbi.nlm.nih.gov/entrez/query.fcgi?cmd=Retrieve&amp;db=pubmed&amp;dopt=Abstract&amp;list_uids=27323857">http://www.ncbi.nlm.nih.gov/entrez/query.fcgi?cmd=Retrieve&amp;db=pubmed&amp;dopt=Abstract&amp;list_uids=27323857</a>  6 Oncotarget  Jun 2016 JOURNAL ARTICLE                                                                                                                                                                                                                                                                                                    |
| akt1     | snord87 | <a href="http://www.ncbi.nlm.nih.gov/entrez/query.fcgi?cmd=Retrieve&amp;db=pubmed&amp;dopt=Abstract&amp;list_uids=27394418">http://www.ncbi.nlm.nih.gov/entrez/query.fcgi?cmd=Retrieve&amp;db=pubmed&amp;dopt=Abstract&amp;list_uids=27394418</a>  6 Neurochem Res  Jul 2016 JOURNAL ARTICLE                                                                                                                                                                                                                                                                                                 |
| akt1     | il13    | <a href="http://www.ncbi.nlm.nih.gov/entrez/query.fcgi?cmd=Retrieve&amp;db=pubmed&amp;dopt=Abstract&amp;list_uids=27424080">http://www.ncbi.nlm.nih.gov/entrez/query.fcgi?cmd=Retrieve&amp;db=pubmed&amp;dopt=Abstract&amp;list_uids=27424080</a>  6 Int Immunopharmacol 39  Oct 2016 Journal Article                                                                                                                                                                                                                                                                                        |
| akt1     | prex2   | <a href="http://www.ncbi.nlm.nih.gov/entrez/query.fcgi?cmd=Retrieve&amp;db=pubmed&amp;dopt=Abstract&amp;list_uids=27446408">http://www.ncbi.nlm.nih.gov/entrez/query.fcgi?cmd=Retrieve&amp;db=pubmed&amp;dopt=Abstract&amp;list_uids=27446408</a>  6 Oncol Lett 12 2 Aug 2016 JOURNAL ARTICLE                                                                                                                                                                                                                                                                                                |
| akt1     | egf     | <a href="http://www.ncbi.nlm.nih.gov/entrez/query.fcgi?cmd=Retrieve&amp;db=pubmed&amp;dopt=Abstract&amp;list_uids=27470348">http://www.ncbi.nlm.nih.gov/entrez/query.fcgi?cmd=Retrieve&amp;db=pubmed&amp;dopt=Abstract&amp;list_uids=27470348</a>  6 Biomed Pharmacother 82  Aug 2016 Journal Article                                                                                                                                                                                                                                                                                        |
| akt1     | tp53    | <a href="http://www.ncbi.nlm.nih.gov/entrez/query.fcgi?cmd=Retrieve&amp;db=pubmed&amp;dopt=Abstract&amp;list_uids=27499479">http://www.ncbi.nlm.nih.gov/entrez/query.fcgi?cmd=Retrieve&amp;db=pubmed&amp;dopt=Abstract&amp;list_uids=27499479</a>  6 Int J Oncol  Aug 2016 JOURNAL ARTICLE                                                                                                                                                                                                                                                                                                   |
| akt1     | mdm2    | <a href="http://www.ncbi.nlm.nih.gov/entrez/query.fcgi?cmd=Retrieve&amp;db=pubmed&amp;dopt=Abstract&amp;list_uids=27499479">http://www.ncbi.nlm.nih.gov/entrez/query.fcgi?cmd=Retrieve&amp;db=pubmed&amp;dopt=Abstract&amp;list_uids=27499479</a>  6 Int J Oncol  Aug 2016 JOURNAL ARTICLE                                                                                                                                                                                                                                                                                                   |

|      |       |                                                                                                                                                                                                                                                                                                                                                                                                                                                                                                                                                                                                                                                                                                                                                                                                                                                                                                                                                                                                                                                                                                                                                                                                                                                                                                                                                                                                                                                                                                                                                                                             |
|------|-------|---------------------------------------------------------------------------------------------------------------------------------------------------------------------------------------------------------------------------------------------------------------------------------------------------------------------------------------------------------------------------------------------------------------------------------------------------------------------------------------------------------------------------------------------------------------------------------------------------------------------------------------------------------------------------------------------------------------------------------------------------------------------------------------------------------------------------------------------------------------------------------------------------------------------------------------------------------------------------------------------------------------------------------------------------------------------------------------------------------------------------------------------------------------------------------------------------------------------------------------------------------------------------------------------------------------------------------------------------------------------------------------------------------------------------------------------------------------------------------------------------------------------------------------------------------------------------------------------|
| akt1 | hcc   | <a href="http://www.ncbi.nlm.nih.gov/entrez/query.fcgi?cmd=Retrieve&amp;db=pubmed&amp;dopt=Abstract&amp;list_uids=27509921">http://www.ncbi.nlm.nih.gov/entrez/query.fcgi?cmd=Retrieve&amp;db=pubmed&amp;dopt=Abstract&amp;list_uids=27509921</a>  6 Oncol Rep  Aug 2016 JOURNAL ARTICLE                                                                                                                                                                                                                                                                                                                                                                                                                                                                                                                                                                                                                                                                                                                                                                                                                                                                                                                                                                                                                                                                                                                                                                                                                                                                                                    |
| akt1 | plau  | <a href="http://www.ncbi.nlm.nih.gov/entrez/query.fcgi?cmd=Retrieve&amp;db=pubmed&amp;dopt=Abstract&amp;list_uids=27527140">http://www.ncbi.nlm.nih.gov/entrez/query.fcgi?cmd=Retrieve&amp;db=pubmed&amp;dopt=Abstract&amp;list_uids=27527140</a>  6 Molecules 21 8  2016 Journal Article                                                                                                                                                                                                                                                                                                                                                                                                                                                                                                                                                                                                                                                                                                                                                                                                                                                                                                                                                                                                                                                                                                                                                                                                                                                                                                   |
| akt1 | mmp2  | <a href="http://www.ncbi.nlm.nih.gov/entrez/query.fcgi?cmd=Retrieve&amp;db=pubmed&amp;dopt=Abstract&amp;list_uids=27511626">http://www.ncbi.nlm.nih.gov/entrez/query.fcgi?cmd=Retrieve&amp;db=pubmed&amp;dopt=Abstract&amp;list_uids=27511626</a>  6 Int J Oncol  Aug 2016 JOURNAL ARTICLE  <a href="http://www.ncbi.nlm.nih.gov/entrez/query.fcgi?cmd=Retrieve&amp;db=pubmed&amp;dopt=Abstract&amp;list_uids=27527140">http://www.ncbi.nlm.nih.gov/entrez/query.fcgi?cmd=Retrieve&amp;db=pubmed&amp;dopt=Abstract&amp;list_uids=27527140</a>  6 Molecules 21 8  2016 Journal Article  <a href="http://www.ncbi.nlm.nih.gov/entrez/query.fcgi?cmd=Retrieve&amp;db=pubmed&amp;dopt=Abstract&amp;list_uids=27470348">http://www.ncbi.nlm.nih.gov/entrez/query.fcgi?cmd=Retrieve&amp;db=pubmed&amp;dopt=Abstract&amp;list_uids=27470348</a>  6 Biomed Pharmacother 82  Aug 2016 Journal Article  <a href="http://www.ncbi.nlm.nih.gov/entrez/query.fcgi?cmd=Retrieve&amp;db=pubmed&amp;dopt=Abstract&amp;list_uids=27324095">http://www.ncbi.nlm.nih.gov/entrez/query.fcgi?cmd=Retrieve&amp;db=pubmed&amp;dopt=Abstract&amp;list_uids=27324095</a>  6 Placenta 43  Jul 2016 Journal Article                                                                                                                                                                                                                                                                                                                                                                                                    |
| akt1 | egr1  | <a href="http://www.ncbi.nlm.nih.gov/entrez/query.fcgi?cmd=Retrieve&amp;db=pubmed&amp;dopt=Abstract&amp;list_uids=27530187">http://www.ncbi.nlm.nih.gov/entrez/query.fcgi?cmd=Retrieve&amp;db=pubmed&amp;dopt=Abstract&amp;list_uids=27530187</a>  6 Hepatology  Aug 2016 JOURNAL ARTICLE                                                                                                                                                                                                                                                                                                                                                                                                                                                                                                                                                                                                                                                                                                                                                                                                                                                                                                                                                                                                                                                                                                                                                                                                                                                                                                   |
| akt1 | mapk3 | <a href="http://www.ncbi.nlm.nih.gov/entrez/query.fcgi?cmd=Retrieve&amp;db=pubmed&amp;dopt=Abstract&amp;list_uids=27320871">http://www.ncbi.nlm.nih.gov/entrez/query.fcgi?cmd=Retrieve&amp;db=pubmed&amp;dopt=Abstract&amp;list_uids=27320871</a>  6 Nan Fang Yi Ke Da Xue Xue Bao 36 6 Jun 2016 English Abstract,Journal Article,Research Support, Non-U.S. Gov't  <a href="http://www.ncbi.nlm.nih.gov/entrez/query.fcgi?cmd=Retrieve&amp;db=pubmed&amp;dopt=Abstract&amp;list_uids=27297262">http://www.ncbi.nlm.nih.gov/entrez/query.fcgi?cmd=Retrieve&amp;db=pubmed&amp;dopt=Abstract&amp;list_uids=27297262</a>  6 Clin Exp Pharmacol Physiol 43 10 Oct 2016 Journal Article  <a href="http://www.ncbi.nlm.nih.gov/entrez/query.fcgi?cmd=Retrieve&amp;db=pubmed&amp;dopt=Abstract&amp;list_uids=27527140">http://www.ncbi.nlm.nih.gov/entrez/query.fcgi?cmd=Retrieve&amp;db=pubmed&amp;dopt=Abstract&amp;list_uids=27527140</a>  6 Molecules 21 8  2016 Journal Article  <a href="http://www.ncbi.nlm.nih.gov/entrez/query.fcgi?cmd=Retrieve&amp;db=pubmed&amp;dopt=Abstract&amp;list_uids=27551764">http://www.ncbi.nlm.nih.gov/entrez/query.fcgi?cmd=Retrieve&amp;db=pubmed&amp;dopt=Abstract&amp;list_uids=27551764</a>  6 Biomed Pharmacother 83  Aug 2016 JOURNAL ARTICLE  <a href="http://www.ncbi.nlm.nih.gov/entrez/query.fcgi?cmd=Retrieve&amp;db=pubmed&amp;dopt=Abstract&amp;list_uids=27470348">http://www.ncbi.nlm.nih.gov/entrez/query.fcgi?cmd=Retrieve&amp;db=pubmed&amp;dopt=Abstract&amp;list_uids=27470348</a>  6 Biomed Pharmacother 82  Aug 2016 Journal Article |
| akt1 | 6-Sep | <a href="http://www.ncbi.nlm.nih.gov/entrez/query.fcgi?cmd=Retrieve&amp;db=pubmed&amp;dopt=Abstract&amp;list_uids=27557506">http://www.ncbi.nlm.nih.gov/entrez/query.fcgi?cmd=Retrieve&amp;db=pubmed&amp;dopt=Abstract&amp;list_uids=27557506</a>  6 Oncotarget  Aug 2016 JOURNAL ARTICLE                                                                                                                                                                                                                                                                                                                                                                                                                                                                                                                                                                                                                                                                                                                                                                                                                                                                                                                                                                                                                                                                                                                                                                                                                                                                                                   |
| akt1 | itk   | <a href="http://www.ncbi.nlm.nih.gov/entrez/query.fcgi?cmd=Retrieve&amp;db=pubmed&amp;dopt=Abstract&amp;list_uids=27562816">http://www.ncbi.nlm.nih.gov/entrez/query.fcgi?cmd=Retrieve&amp;db=pubmed&amp;dopt=Abstract&amp;list_uids=27562816</a>  6 Cell Physiol Biochem 39 3  2016 Journal Article  <a href="http://www.ncbi.nlm.nih.gov/entrez/query.fcgi?cmd=Retrieve&amp;db=pubmed&amp;dopt=Abstract&amp;list_uids=27507215">http://www.ncbi.nlm.nih.gov/entrez/query.fcgi?cmd=Retrieve&amp;db=pubmed&amp;dopt=Abstract&amp;list_uids=27507215</a>  6 Biochem Biophys Res Commun 478 2 Sep 2016 Journal Article                                                                                                                                                                                                                                                                                                                                                                                                                                                                                                                                                                                                                                                                                                                                                                                                                                                                                                                                                                        |
| akt1 | foxc2 | <a href="http://www.ncbi.nlm.nih.gov/entrez/query.fcgi?cmd=Retrieve&amp;db=pubmed&amp;dopt=Abstract&amp;list_uids=27562816">http://www.ncbi.nlm.nih.gov/entrez/query.fcgi?cmd=Retrieve&amp;db=pubmed&amp;dopt=Abstract&amp;list_uids=27562816</a>  6 Cell Physiol Biochem 39 3  2016 Journal Article                                                                                                                                                                                                                                                                                                                                                                                                                                                                                                                                                                                                                                                                                                                                                                                                                                                                                                                                                                                                                                                                                                                                                                                                                                                                                        |
| akt1 | zhx2  | <a href="http://www.ncbi.nlm.nih.gov/entrez/query.fcgi?cmd=Retrieve&amp;db=pubmed&amp;dopt=Abstract&amp;list_uids=27572273">http://www.ncbi.nlm.nih.gov/entrez/query.fcgi?cmd=Retrieve&amp;db=pubmed&amp;dopt=Abstract&amp;list_uids=27572273</a>  6 Int J Oncol 49 3 Sep 2016 Journal Article                                                                                                                                                                                                                                                                                                                                                                                                                                                                                                                                                                                                                                                                                                                                                                                                                                                                                                                                                                                                                                                                                                                                                                                                                                                                                              |
| akt1 | il17a | <a href="http://www.ncbi.nlm.nih.gov/entrez/query.fcgi?cmd=Retrieve&amp;db=pubmed&amp;dopt=Abstract&amp;list_uids=27572304">http://www.ncbi.nlm.nih.gov/entrez/query.fcgi?cmd=Retrieve&amp;db=pubmed&amp;dopt=Abstract&amp;list_uids=27572304</a>  6 Sci Rep 6  2016 Journal Article                                                                                                                                                                                                                                                                                                                                                                                                                                                                                                                                                                                                                                                                                                                                                                                                                                                                                                                                                                                                                                                                                                                                                                                                                                                                                                        |



|      |          |                                                                                                                                                                                                                                                                                                                                                                                                                                                                                                                                                                                                                                                                                                                                                                                                                                                                                                                                                                                                                                                                                                                                                                                                                                                                                                                                                                                                                                                                                                                                                                                                                                                                                                                                                                                                                                                                                                                                                                                                                                                                                                                                                                                                                                                                                                                                                                                                                                                                                                                                                                                                                                                                                                      |
|------|----------|------------------------------------------------------------------------------------------------------------------------------------------------------------------------------------------------------------------------------------------------------------------------------------------------------------------------------------------------------------------------------------------------------------------------------------------------------------------------------------------------------------------------------------------------------------------------------------------------------------------------------------------------------------------------------------------------------------------------------------------------------------------------------------------------------------------------------------------------------------------------------------------------------------------------------------------------------------------------------------------------------------------------------------------------------------------------------------------------------------------------------------------------------------------------------------------------------------------------------------------------------------------------------------------------------------------------------------------------------------------------------------------------------------------------------------------------------------------------------------------------------------------------------------------------------------------------------------------------------------------------------------------------------------------------------------------------------------------------------------------------------------------------------------------------------------------------------------------------------------------------------------------------------------------------------------------------------------------------------------------------------------------------------------------------------------------------------------------------------------------------------------------------------------------------------------------------------------------------------------------------------------------------------------------------------------------------------------------------------------------------------------------------------------------------------------------------------------------------------------------------------------------------------------------------------------------------------------------------------------------------------------------------------------------------------------------------------|
| akt1 | mmp9     | <a href="http://www.ncbi.nlm.nih.gov/entrez/query.fcgi?cmd=Retrieve&amp;db=pubmed&amp;dopt=Abstract&amp;list_uids=27573026">http://www.ncbi.nlm.nih.gov/entrez/query.fcgi?cmd=Retrieve&amp;db=pubmed&amp;dopt=Abstract&amp;list_uids=27573026</a>  6 Int J Oncol 49 3 Sep 2016 Journal Article  <a href="http://www.ncbi.nlm.nih.gov/entrez/query.fcgi?cmd=Retrieve&amp;db=pubmed&amp;dopt=Abstract&amp;list_uids=27511626">http://www.ncbi.nlm.nih.gov/entrez/query.fcgi?cmd=Retrieve&amp;db=pubmed&amp;dopt=Abstract&amp;list_uids=27511626</a>  6 Int J Oncol   Aug 2016 JOURNAL ARTICLE  <a href="http://www.ncbi.nlm.nih.gov/entrez/query.fcgi?cmd=Retrieve&amp;db=pubmed&amp;dopt=Abstract&amp;list_uids=27527140">http://www.ncbi.nlm.nih.gov/entrez/query.fcgi?cmd=Retrieve&amp;db=pubmed&amp;dopt=Abstract&amp;list_uids=27527140</a>  6 Molecules 21 8  2016 Journal Article  <a href="http://www.ncbi.nlm.nih.gov/entrez/query.fcgi?cmd=Retrieve&amp;db=pubmed&amp;dopt=Abstract&amp;list_uids=27470348">http://www.ncbi.nlm.nih.gov/entrez/query.fcgi?cmd=Retrieve&amp;db=pubmed&amp;dopt=Abstract&amp;list_uids=27470348</a>  6 Biomed Pharmacother 82  Aug 2016 Journal Article  <a href="http://www.ncbi.nlm.nih.gov/entrez/query.fcgi?cmd=Retrieve&amp;db=pubmed&amp;dopt=Abstract&amp;list_uids=27324095">http://www.ncbi.nlm.nih.gov/entrez/query.fcgi?cmd=Retrieve&amp;db=pubmed&amp;dopt=Abstract&amp;list_uids=27324095</a>  6 Placenta 43  Jul 2016 Journal Article                                                                                                                                                                                                                                                                                                                                                                                                                                                                                                                                                                                                                                                                                                                                                                                                                                                                                                                                                                                                                                                                                                                                                                                                            |
| akt1 | frap1    | <a href="http://www.ncbi.nlm.nih.gov/entrez/query.fcgi?cmd=Retrieve&amp;db=pubmed&amp;dopt=Abstract&amp;list_uids=27499479">http://www.ncbi.nlm.nih.gov/entrez/query.fcgi?cmd=Retrieve&amp;db=pubmed&amp;dopt=Abstract&amp;list_uids=27499479</a>  6 Int J Oncol   Aug 2016 JOURNAL ARTICLE  <a href="http://www.ncbi.nlm.nih.gov/entrez/query.fcgi?cmd=Retrieve&amp;db=pubmed&amp;dopt=Abstract&amp;list_uids=27498786">http://www.ncbi.nlm.nih.gov/entrez/query.fcgi?cmd=Retrieve&amp;db=pubmed&amp;dopt=Abstract&amp;list_uids=27498786</a>  6 Oncol Rep   Aug 2016 JOURNAL ARTICLE  <a href="http://www.ncbi.nlm.nih.gov/entrez/query.fcgi?cmd=Retrieve&amp;db=pubmed&amp;dopt=Abstract&amp;list_uids=27394418">http://www.ncbi.nlm.nih.gov/entrez/query.fcgi?cmd=Retrieve&amp;db=pubmed&amp;dopt=Abstract&amp;list_uids=27394418</a>  6 Neurochem Res   Jul 2016 JOURNAL ARTICLE  <a href="http://www.ncbi.nlm.nih.gov/entrez/query.fcgi?cmd=Retrieve&amp;db=pubmed&amp;dopt=Abstract&amp;list_uids=27572296">http://www.ncbi.nlm.nih.gov/entrez/query.fcgi?cmd=Retrieve&amp;db=pubmed&amp;dopt=Abstract&amp;list_uids=27572296</a>  6 Oncol Rep   Aug 2016 JOURNAL ARTICLE  <a href="http://www.ncbi.nlm.nih.gov/entrez/query.fcgi?cmd=Retrieve&amp;db=pubmed&amp;dopt=Abstract&amp;list_uids=27424080">http://www.ncbi.nlm.nih.gov/entrez/query.fcgi?cmd=Retrieve&amp;db=pubmed&amp;dopt=Abstract&amp;list_uids=27424080</a>  6 Int Immunopharmacol 39  Oct 2016 Journal Article  <a href="http://www.ncbi.nlm.nih.gov/entrez/query.fcgi?cmd=Retrieve&amp;db=pubmed&amp;dopt=Abstract&amp;list_uids=27491275">http://www.ncbi.nlm.nih.gov/entrez/query.fcgi?cmd=Retrieve&amp;db=pubmed&amp;dopt=Abstract&amp;list_uids=27491275</a>  6 Matrix Biol   Aug 2016 REVIEW, JOURNAL ARTICLE  <a href="http://www.ncbi.nlm.nih.gov/entrez/query.fcgi?cmd=Retrieve&amp;db=pubmed&amp;dopt=Abstract&amp;list_uids=27563247">http://www.ncbi.nlm.nih.gov/entrez/query.fcgi?cmd=Retrieve&amp;db=pubmed&amp;dopt=Abstract&amp;list_uids=27563247</a>  6 Onco Targets Ther 9   2016 Journal Article  <a href="http://www.ncbi.nlm.nih.gov/entrez/query.fcgi?cmd=Retrieve&amp;db=pubmed&amp;dopt=Abstract&amp;list_uids=27551764">http://www.ncbi.nlm.nih.gov/entrez/query.fcgi?cmd=Retrieve&amp;db=pubmed&amp;dopt=Abstract&amp;list_uids=27551764</a>  6 Biomed Pharmacother 83  Aug 2016 JOURNAL ARTICLE  <a href="http://www.ncbi.nlm.nih.gov/entrez/query.fcgi?cmd=Retrieve&amp;db=pubmed&amp;dopt=Abstract&amp;list_uids=27573547">http://www.ncbi.nlm.nih.gov/entrez/query.fcgi?cmd=Retrieve&amp;db=pubmed&amp;dopt=Abstract&amp;list_uids=27573547</a>  6 Int J Oncol 49 3 Sep 2016 Journal Article |
| akt1 | mirn216a | <a href="http://www.ncbi.nlm.nih.gov/entrez/query.fcgi?cmd=Retrieve&amp;db=pubmed&amp;dopt=Abstract&amp;list_uids=27578985">http://www.ncbi.nlm.nih.gov/entrez/query.fcgi?cmd=Retrieve&amp;db=pubmed&amp;dopt=Abstract&amp;list_uids=27578985</a>  6 Onco Targets Ther 9   2016 Journal Article                                                                                                                                                                                                                                                                                                                                                                                                                                                                                                                                                                                                                                                                                                                                                                                                                                                                                                                                                                                                                                                                                                                                                                                                                                                                                                                                                                                                                                                                                                                                                                                                                                                                                                                                                                                                                                                                                                                                                                                                                                                                                                                                                                                                                                                                                                                                                                                                      |
| akt1 | pc-3     | <a href="http://www.ncbi.nlm.nih.gov/entrez/query.fcgi?cmd=Retrieve&amp;db=pubmed&amp;dopt=Abstract&amp;list_uids=27588482">http://www.ncbi.nlm.nih.gov/entrez/query.fcgi?cmd=Retrieve&amp;db=pubmed&amp;dopt=Abstract&amp;list_uids=27588482</a>  6 Oncotarget   Aug 2016 JOURNAL ARTICLE                                                                                                                                                                                                                                                                                                                                                                                                                                                                                                                                                                                                                                                                                                                                                                                                                                                                                                                                                                                                                                                                                                                                                                                                                                                                                                                                                                                                                                                                                                                                                                                                                                                                                                                                                                                                                                                                                                                                                                                                                                                                                                                                                                                                                                                                                                                                                                                                           |
| akt1 | mirn222  | <a href="http://www.ncbi.nlm.nih.gov/entrez/query.fcgi?cmd=Retrieve&amp;db=pubmed&amp;dopt=Abstract&amp;list_uids=27602961">http://www.ncbi.nlm.nih.gov/entrez/query.fcgi?cmd=Retrieve&amp;db=pubmed&amp;dopt=Abstract&amp;list_uids=27602961</a>  6 Oncotarget   Sep 2016 JOURNAL ARTICLE                                                                                                                                                                                                                                                                                                                                                                                                                                                                                                                                                                                                                                                                                                                                                                                                                                                                                                                                                                                                                                                                                                                                                                                                                                                                                                                                                                                                                                                                                                                                                                                                                                                                                                                                                                                                                                                                                                                                                                                                                                                                                                                                                                                                                                                                                                                                                                                                           |
| akt1 | ppp2r2a  | <a href="http://www.ncbi.nlm.nih.gov/entrez/query.fcgi?cmd=Retrieve&amp;db=pubmed&amp;dopt=Abstract&amp;list_uids=27602961">http://www.ncbi.nlm.nih.gov/entrez/query.fcgi?cmd=Retrieve&amp;db=pubmed&amp;dopt=Abstract&amp;list_uids=27602961</a>  6 Oncotarget   Sep 2016 JOURNAL ARTICLE                                                                                                                                                                                                                                                                                                                                                                                                                                                                                                                                                                                                                                                                                                                                                                                                                                                                                                                                                                                                                                                                                                                                                                                                                                                                                                                                                                                                                                                                                                                                                                                                                                                                                                                                                                                                                                                                                                                                                                                                                                                                                                                                                                                                                                                                                                                                                                                                           |

|        |          |                                                                                                                                                                                                                                                                                                                                                                                                                                                                                                                                                                                                                                                                                                                                                                                                                                                                                                                                                                                                                                                                                                                                                                                                                                                                                                                                                                                                                                                                                                                                                                                                                                                                                                                                                                                                                                                                                                                                                                                                                                                                                                         |
|--------|----------|---------------------------------------------------------------------------------------------------------------------------------------------------------------------------------------------------------------------------------------------------------------------------------------------------------------------------------------------------------------------------------------------------------------------------------------------------------------------------------------------------------------------------------------------------------------------------------------------------------------------------------------------------------------------------------------------------------------------------------------------------------------------------------------------------------------------------------------------------------------------------------------------------------------------------------------------------------------------------------------------------------------------------------------------------------------------------------------------------------------------------------------------------------------------------------------------------------------------------------------------------------------------------------------------------------------------------------------------------------------------------------------------------------------------------------------------------------------------------------------------------------------------------------------------------------------------------------------------------------------------------------------------------------------------------------------------------------------------------------------------------------------------------------------------------------------------------------------------------------------------------------------------------------------------------------------------------------------------------------------------------------------------------------------------------------------------------------------------------------|
| pik3ca | mtdh     | <a href="http://www.ncbi.nlm.nih.gov/entrez/query.fcgi?cmd=Retrieve&amp;db=pubmed&amp;dopt=Abstract&amp;list_uids=27251589">http://www.ncbi.nlm.nih.gov/entrez/query.fcgi?cmd=Retrieve&amp;db=pubmed&amp;dopt=Abstract&amp;list_uids=27251589</a>  6 Sci Rep 6   2016 Journal Article                                                                                                                                                                                                                                                                                                                                                                                                                                                                                                                                                                                                                                                                                                                                                                                                                                                                                                                                                                                                                                                                                                                                                                                                                                                                                                                                                                                                                                                                                                                                                                                                                                                                                                                                                                                                                   |
| pik3ca | nras     | <a href="http://www.ncbi.nlm.nih.gov/entrez/query.fcgi?cmd=Retrieve&amp;db=pubmed&amp;dopt=Abstract&amp;list_uids=27251789">http://www.ncbi.nlm.nih.gov/entrez/query.fcgi?cmd=Retrieve&amp;db=pubmed&amp;dopt=Abstract&amp;list_uids=27251789</a>  6 J Invest Dermatol   May 2016 JOURNAL ARTICLE                                                                                                                                                                                                                                                                                                                                                                                                                                                                                                                                                                                                                                                                                                                                                                                                                                                                                                                                                                                                                                                                                                                                                                                                                                                                                                                                                                                                                                                                                                                                                                                                                                                                                                                                                                                                       |
| pik3ca | egfr     | <a href="http://www.ncbi.nlm.nih.gov/entrez/query.fcgi?cmd=Retrieve&amp;db=pubmed&amp;dopt=Abstract&amp;list_uids=27317099">http://www.ncbi.nlm.nih.gov/entrez/query.fcgi?cmd=Retrieve&amp;db=pubmed&amp;dopt=Abstract&amp;list_uids=27317099</a>  6 J Exp Clin Cancer Res 35 1  2016 Journal Article                                                                                                                                                                                                                                                                                                                                                                                                                                                                                                                                                                                                                                                                                                                                                                                                                                                                                                                                                                                                                                                                                                                                                                                                                                                                                                                                                                                                                                                                                                                                                                                                                                                                                                                                                                                                   |
| pik3ca | il13     | <a href="http://www.ncbi.nlm.nih.gov/entrez/query.fcgi?cmd=Retrieve&amp;db=pubmed&amp;dopt=Abstract&amp;list_uids=27424080">http://www.ncbi.nlm.nih.gov/entrez/query.fcgi?cmd=Retrieve&amp;db=pubmed&amp;dopt=Abstract&amp;list_uids=27424080</a>  6 Int Immunopharmacol 39  Oct 2016 Journal Article                                                                                                                                                                                                                                                                                                                                                                                                                                                                                                                                                                                                                                                                                                                                                                                                                                                                                                                                                                                                                                                                                                                                                                                                                                                                                                                                                                                                                                                                                                                                                                                                                                                                                                                                                                                                   |
| pik3ca | chrna4   | <a href="http://www.ncbi.nlm.nih.gov/entrez/query.fcgi?cmd=Retrieve&amp;db=pubmed&amp;dopt=Abstract&amp;list_uids=27424921">http://www.ncbi.nlm.nih.gov/entrez/query.fcgi?cmd=Retrieve&amp;db=pubmed&amp;dopt=Abstract&amp;list_uids=27424921</a>  6 Biochim Biophys Acta 1860 11 Pt A Nov 2016 Journal Article                                                                                                                                                                                                                                                                                                                                                                                                                                                                                                                                                                                                                                                                                                                                                                                                                                                                                                                                                                                                                                                                                                                                                                                                                                                                                                                                                                                                                                                                                                                                                                                                                                                                                                                                                                                         |
| pik3ca | prdx2    | <a href="http://www.ncbi.nlm.nih.gov/entrez/query.fcgi?cmd=Retrieve&amp;db=pubmed&amp;dopt=Abstract&amp;list_uids=27507059">http://www.ncbi.nlm.nih.gov/entrez/query.fcgi?cmd=Retrieve&amp;db=pubmed&amp;dopt=Abstract&amp;list_uids=27507059</a>  6 Oncotarget   Aug 2016 JOURNAL ARTICLE                                                                                                                                                                                                                                                                                                                                                                                                                                                                                                                                                                                                                                                                                                                                                                                                                                                                                                                                                                                                                                                                                                                                                                                                                                                                                                                                                                                                                                                                                                                                                                                                                                                                                                                                                                                                              |
| pik3ca | hdac9    | <a href="http://www.ncbi.nlm.nih.gov/entrez/query.fcgi?cmd=Retrieve&amp;db=pubmed&amp;dopt=Abstract&amp;list_uids=27507059">http://www.ncbi.nlm.nih.gov/entrez/query.fcgi?cmd=Retrieve&amp;db=pubmed&amp;dopt=Abstract&amp;list_uids=27507059</a>  6 Oncotarget   Aug 2016 JOURNAL ARTICLE                                                                                                                                                                                                                                                                                                                                                                                                                                                                                                                                                                                                                                                                                                                                                                                                                                                                                                                                                                                                                                                                                                                                                                                                                                                                                                                                                                                                                                                                                                                                                                                                                                                                                                                                                                                                              |
| pik3ca | zhx2     | <a href="http://www.ncbi.nlm.nih.gov/entrez/query.fcgi?cmd=Retrieve&amp;db=pubmed&amp;dopt=Abstract&amp;list_uids=27572273">http://www.ncbi.nlm.nih.gov/entrez/query.fcgi?cmd=Retrieve&amp;db=pubmed&amp;dopt=Abstract&amp;list_uids=27572273</a>  6 Int J Oncol 49 3 Sep 2016 Journal Article                                                                                                                                                                                                                                                                                                                                                                                                                                                                                                                                                                                                                                                                                                                                                                                                                                                                                                                                                                                                                                                                                                                                                                                                                                                                                                                                                                                                                                                                                                                                                                                                                                                                                                                                                                                                          |
| pik3ca | frap1    | <a href="http://www.ncbi.nlm.nih.gov/entrez/query.fcgi?cmd=Retrieve&amp;db=pubmed&amp;dopt=Abstract&amp;list_uids=27498786">http://www.ncbi.nlm.nih.gov/entrez/query.fcgi?cmd=Retrieve&amp;db=pubmed&amp;dopt=Abstract&amp;list_uids=27498786</a>  6 Oncol Rep   Aug 2016 JOURNAL ARTICLE  <a href="http://www.ncbi.nlm.nih.gov/entrez/query.fcgi?cmd=Retrieve&amp;db=pubmed&amp;dopt=Abstract&amp;list_uids=27394418">http://www.ncbi.nlm.nih.gov/entrez/query.fcgi?cmd=Retrieve&amp;db=pubmed&amp;dopt=Abstract&amp;list_uids=27394418</a>  6 Neurochem Res   Jul 2016 JOURNAL ARTICLE  <a href="http://www.ncbi.nlm.nih.gov/entrez/query.fcgi?cmd=Retrieve&amp;db=pubmed&amp;dopt=Abstract&amp;list_uids=27424080">http://www.ncbi.nlm.nih.gov/entrez/query.fcgi?cmd=Retrieve&amp;db=pubmed&amp;dopt=Abstract&amp;list_uids=27424080</a>  6 Int Immunopharmacol 39  Oct 2016 Journal Article  <a href="http://www.ncbi.nlm.nih.gov/entrez/query.fcgi?cmd=Retrieve&amp;db=pubmed&amp;dopt=Abstract&amp;list_uids=27491275">http://www.ncbi.nlm.nih.gov/entrez/query.fcgi?cmd=Retrieve&amp;db=pubmed&amp;dopt=Abstract&amp;list_uids=27491275</a>  6 Matrix Biol   Aug 2016 REVIEW, JOURNAL ARTICLE  <a href="http://www.ncbi.nlm.nih.gov/entrez/query.fcgi?cmd=Retrieve&amp;db=pubmed&amp;dopt=Abstract&amp;list_uids=27551764">http://www.ncbi.nlm.nih.gov/entrez/query.fcgi?cmd=Retrieve&amp;db=pubmed&amp;dopt=Abstract&amp;list_uids=27551764</a>  6 Biomed Pharmacother 83  Aug 2016 JOURNAL ARTICLE  <a href="http://www.ncbi.nlm.nih.gov/entrez/query.fcgi?cmd=Retrieve&amp;db=pubmed&amp;dopt=Abstract&amp;list_uids=27507059">http://www.ncbi.nlm.nih.gov/entrez/query.fcgi?cmd=Retrieve&amp;db=pubmed&amp;dopt=Abstract&amp;list_uids=27507059</a>  6 Oncotarget   Aug 2016 JOURNAL ARTICLE  <a href="http://www.ncbi.nlm.nih.gov/entrez/query.fcgi?cmd=Retrieve&amp;db=pubmed&amp;dopt=Abstract&amp;list_uids=27573547">http://www.ncbi.nlm.nih.gov/entrez/query.fcgi?cmd=Retrieve&amp;db=pubmed&amp;dopt=Abstract&amp;list_uids=27573547</a>  6 Int J Oncol 49 3 Sep 2016 Journal Article |
| pik3ca | mirn216a | <a href="http://www.ncbi.nlm.nih.gov/entrez/query.fcgi?cmd=Retrieve&amp;db=pubmed&amp;dopt=Abstract&amp;list_uids=27578985">http://www.ncbi.nlm.nih.gov/entrez/query.fcgi?cmd=Retrieve&amp;db=pubmed&amp;dopt=Abstract&amp;list_uids=27578985</a>  6 Oncotargets Ther 9   2016 Journal Article                                                                                                                                                                                                                                                                                                                                                                                                                                                                                                                                                                                                                                                                                                                                                                                                                                                                                                                                                                                                                                                                                                                                                                                                                                                                                                                                                                                                                                                                                                                                                                                                                                                                                                                                                                                                          |
| pik3ca | pc-3     | <a href="http://www.ncbi.nlm.nih.gov/entrez/query.fcgi?cmd=Retrieve&amp;db=pubmed&amp;dopt=Abstract&amp;list_uids=27588482">http://www.ncbi.nlm.nih.gov/entrez/query.fcgi?cmd=Retrieve&amp;db=pubmed&amp;dopt=Abstract&amp;list_uids=27588482</a>  6 Oncotarget   Aug 2016 JOURNAL ARTICLE                                                                                                                                                                                                                                                                                                                                                                                                                                                                                                                                                                                                                                                                                                                                                                                                                                                                                                                                                                                                                                                                                                                                                                                                                                                                                                                                                                                                                                                                                                                                                                                                                                                                                                                                                                                                              |
| pik3ca | egf      | <a href="http://www.ncbi.nlm.nih.gov/entrez/query.fcgi?cmd=Retrieve&amp;db=pubmed&amp;dopt=Abstract&amp;list_uids=27598237">http://www.ncbi.nlm.nih.gov/entrez/query.fcgi?cmd=Retrieve&amp;db=pubmed&amp;dopt=Abstract&amp;list_uids=27598237</a>  6 Eur J Med Chem 124  Aug 2016 JOURNAL                                                                                                                                                                                                                                                                                                                                                                                                                                                                                                                                                                                                                                                                                                                                                                                                                                                                                                                                                                                                                                                                                                                                                                                                                                                                                                                                                                                                                                                                                                                                                                                                                                                                                                                                                                                                               |

|        |        |                                                                                                                                                                                                                                                                                                                                                                                                                                                                                                                                                                                                                                                                                                                                                                                                                                                                                                                                                                                                                                                                                                                                                                                                                                                                                                                                                                                                                                                                                                                                                                                                                                                                                                                                                                                                                                                                                                                                                                                                                                                                                                                                                                                                                                                                                                                                                                                                                                                                                   |
|--------|--------|-----------------------------------------------------------------------------------------------------------------------------------------------------------------------------------------------------------------------------------------------------------------------------------------------------------------------------------------------------------------------------------------------------------------------------------------------------------------------------------------------------------------------------------------------------------------------------------------------------------------------------------------------------------------------------------------------------------------------------------------------------------------------------------------------------------------------------------------------------------------------------------------------------------------------------------------------------------------------------------------------------------------------------------------------------------------------------------------------------------------------------------------------------------------------------------------------------------------------------------------------------------------------------------------------------------------------------------------------------------------------------------------------------------------------------------------------------------------------------------------------------------------------------------------------------------------------------------------------------------------------------------------------------------------------------------------------------------------------------------------------------------------------------------------------------------------------------------------------------------------------------------------------------------------------------------------------------------------------------------------------------------------------------------------------------------------------------------------------------------------------------------------------------------------------------------------------------------------------------------------------------------------------------------------------------------------------------------------------------------------------------------------------------------------------------------------------------------------------------------|
|        |        | ARTICLE http://www.ncbi.nlm.nih.gov/entrez/query.fcgi?cmd=Retrieve&db=pubmed&dopt=Abstract&list_uids=27470348 6 Biomed Pharmacother 82  Aug 2016 JOURNAL Article                                                                                                                                                                                                                                                                                                                                                                                                                                                                                                                                                                                                                                                                                                                                                                                                                                                                                                                                                                                                                                                                                                                                                                                                                                                                                                                                                                                                                                                                                                                                                                                                                                                                                                                                                                                                                                                                                                                                                                                                                                                                                                                                                                                                                                                                                                                  |
| pik3ca | slamf7 | http://www.ncbi.nlm.nih.gov/entrez/query.fcgi?cmd=Retrieve&db=pubmed&dopt=Abstract&list_uids=27598237 6 Eur J Med Chem 124  Aug 2016 JOURNAL ARTICLE                                                                                                                                                                                                                                                                                                                                                                                                                                                                                                                                                                                                                                                                                                                                                                                                                                                                                                                                                                                                                                                                                                                                                                                                                                                                                                                                                                                                                                                                                                                                                                                                                                                                                                                                                                                                                                                                                                                                                                                                                                                                                                                                                                                                                                                                                                                              |
|        |        | http://www.ncbi.nlm.nih.gov/entrez/query.fcgi?cmd=Retrieve&db=pubmed&dopt=Abstract&list_uids=27496641 6 Mol Cell Endocrinol 436  Aug 2016 JOURNAL<br>ARTICLE http://www.ncbi.nlm.nih.gov/entrez/query.fcgi?cmd=Retrieve&db=pubmed&dopt=Abstract&list_uids=27498786 6 Oncol Rep   Aug 2016 JOURNAL<br>ARTICLE http://www.ncbi.nlm.nih.gov/entrez/query.fcgi?cmd=Retrieve&db=pubmed&dopt=Abstract&list_uids=27394418 6 Neurochem Res   Jul 2016 JOURNAL<br>ARTICLE http://www.ncbi.nlm.nih.gov/entrez/query.fcgi?cmd=Retrieve&db=pubmed&dopt=Abstract&list_uids=27569589 6 Life Sci   Aug 2016 JOURNAL<br>ARTICLE http://www.ncbi.nlm.nih.gov/entrez/query.fcgi?cmd=Retrieve&db=pubmed&dopt=Abstract&list_uids=27602956 6 Oncotarget   Sep 2016 JOURNAL<br>ARTICLE http://www.ncbi.nlm.nih.gov/entrez/query.fcgi?cmd=Retrieve&db=pubmed&dopt=Abstract&list_uids=27489353 6 Oncotarget   Jul 2016 JOURNAL<br>ARTICLE http://www.ncbi.nlm.nih.gov/entrez/query.fcgi?cmd=Retrieve&db=pubmed&dopt=Abstract&list_uids=27458096 6 Oncol Res 24 3  2016 Journal<br>Article http://www.ncbi.nlm.nih.gov/entrez/query.fcgi?cmd=Retrieve&db=pubmed&dopt=Abstract&list_uids=27600360 6 Cell Biol Int   Sep 2016 JOURNAL<br>ARTICLE http://www.ncbi.nlm.nih.gov/entrez/query.fcgi?cmd=Retrieve&db=pubmed&dopt=Abstract&list_uids=27572273 6 Int J Oncol 49 3 Sep 2016 Journal<br>Article http://www.ncbi.nlm.nih.gov/entrez/query.fcgi?cmd=Retrieve&db=pubmed&dopt=Abstract&list_uids=27424921 6 Biochim Biophys Acta 1860 11 Pt A Nov 2016 Journal<br>Article http://www.ncbi.nlm.nih.gov/entrez/query.fcgi?cmd=Retrieve&db=pubmed&dopt=Abstract&list_uids=27530117 6 Biomol Ther (Seoul)   Aug 2016 JOURNAL<br>ARTICLE http://www.ncbi.nlm.nih.gov/entrez/query.fcgi?cmd=Retrieve&db=pubmed&dopt=Abstract&list_uids=27301070 6 Stem Cells 34 9 Sep 2016 Journal<br>Article http://www.ncbi.nlm.nih.gov/entrez/query.fcgi?cmd=Retrieve&db=pubmed&dopt=Abstract&list_uids=27573547 6 Int J Oncol 49 3 Sep 2016 Journal<br>Article http://www.ncbi.nlm.nih.gov/entrez/query.fcgi?cmd=Retrieve&db=pubmed&dopt=Abstract&list_uids=27344565 6 Cell Biol Toxicol 32 5 Oct 2016 Journal<br>Article http://www.ncbi.nlm.nih.gov/entrez/query.fcgi?cmd=Retrieve&db=pubmed&dopt=Abstract&list_uids=27424080 6 Int Immunopharmacol 39  Oct 2016 Journal<br>Article http://www.ncbi.nlm.nih.gov/entrez/query.fcgi?cmd=Retrieve&db=pubmed&dopt=Abstract&list_uids=27498977 6 Int J Oncol   Jul 2016 JOURNAL |
| pik3ca | akt1   |                                                                                                                                                                                                                                                                                                                                                                                                                                                                                                                                                                                                                                                                                                                                                                                                                                                                                                                                                                                                                                                                                                                                                                                                                                                                                                                                                                                                                                                                                                                                                                                                                                                                                                                                                                                                                                                                                                                                                                                                                                                                                                                                                                                                                                                                                                                                                                                                                                                                                   |

|       |            |                                                                                                                                                                                                                                                                                                                                                                                                                                                                                                                                                                                                                                                                                                                                                                                                                                                                                                                                                                                                                                                                                                                                                                                                                                                                                                                                                                                                                                                                                                                                                                                                                                                                                                                                                                                                                                                                                                                                                                                                                                                                                                                                                                                                                                                                                                                                                                                                                                                                                                                                                                                                                                                                                                                                                                                                                                                                                                                                                                                                                                                                                                                                                                                                                                                                                                                                                                                                                                                                                                                                                                                                                                                                                                                                                                                                                                                                                                                                                                                                                                                                                                                                                                                                                                                                                                      |
|-------|------------|------------------------------------------------------------------------------------------------------------------------------------------------------------------------------------------------------------------------------------------------------------------------------------------------------------------------------------------------------------------------------------------------------------------------------------------------------------------------------------------------------------------------------------------------------------------------------------------------------------------------------------------------------------------------------------------------------------------------------------------------------------------------------------------------------------------------------------------------------------------------------------------------------------------------------------------------------------------------------------------------------------------------------------------------------------------------------------------------------------------------------------------------------------------------------------------------------------------------------------------------------------------------------------------------------------------------------------------------------------------------------------------------------------------------------------------------------------------------------------------------------------------------------------------------------------------------------------------------------------------------------------------------------------------------------------------------------------------------------------------------------------------------------------------------------------------------------------------------------------------------------------------------------------------------------------------------------------------------------------------------------------------------------------------------------------------------------------------------------------------------------------------------------------------------------------------------------------------------------------------------------------------------------------------------------------------------------------------------------------------------------------------------------------------------------------------------------------------------------------------------------------------------------------------------------------------------------------------------------------------------------------------------------------------------------------------------------------------------------------------------------------------------------------------------------------------------------------------------------------------------------------------------------------------------------------------------------------------------------------------------------------------------------------------------------------------------------------------------------------------------------------------------------------------------------------------------------------------------------------------------------------------------------------------------------------------------------------------------------------------------------------------------------------------------------------------------------------------------------------------------------------------------------------------------------------------------------------------------------------------------------------------------------------------------------------------------------------------------------------------------------------------------------------------------------------------------------------------------------------------------------------------------------------------------------------------------------------------------------------------------------------------------------------------------------------------------------------------------------------------------------------------------------------------------------------------------------------------------------------------------------------------------------------------------------|
|       |            | <p>ARTICLE <a href="http://www.ncbi.nlm.nih.gov/entrez/query.fcgi?cmd=Retrieve&amp;db=pubmed&amp;dopt=Abstract&amp;list_uids=27572091">http://www.ncbi.nlm.nih.gov/entrez/query.fcgi?cmd=Retrieve&amp;db=pubmed&amp;dopt=Abstract&amp;list_uids=27572091</a> 6 Mol Med Rep   Aug 2016 JOURNAL</p> <p>ARTICLE <a href="http://www.ncbi.nlm.nih.gov/entrez/query.fcgi?cmd=Retrieve&amp;db=pubmed&amp;dopt=Abstract&amp;list_uids=27507059">http://www.ncbi.nlm.nih.gov/entrez/query.fcgi?cmd=Retrieve&amp;db=pubmed&amp;dopt=Abstract&amp;list_uids=27507059</a> 6 Oncotarget   Aug 2016 JOURNAL</p> <p>ARTICLE <a href="http://www.ncbi.nlm.nih.gov/entrez/query.fcgi?cmd=Retrieve&amp;db=pubmed&amp;dopt=Abstract&amp;list_uids=27470348">http://www.ncbi.nlm.nih.gov/entrez/query.fcgi?cmd=Retrieve&amp;db=pubmed&amp;dopt=Abstract&amp;list_uids=27470348</a> 6 Biomed Pharmacother 82  Aug 2016 Journal</p> <p>Article <a href="http://www.ncbi.nlm.nih.gov/entrez/query.fcgi?cmd=Retrieve&amp;db=pubmed&amp;dopt=Abstract&amp;list_uids=27598237">http://www.ncbi.nlm.nih.gov/entrez/query.fcgi?cmd=Retrieve&amp;db=pubmed&amp;dopt=Abstract&amp;list_uids=27598237</a> 6 Eur J Med Chem 124  Aug 2016 JOURNAL</p> <p>ARTICLE <a href="http://www.ncbi.nlm.nih.gov/entrez/query.fcgi?cmd=Retrieve&amp;db=pubmed&amp;dopt=Abstract&amp;list_uids=27446408">http://www.ncbi.nlm.nih.gov/entrez/query.fcgi?cmd=Retrieve&amp;db=pubmed&amp;dopt=Abstract&amp;list_uids=27446408</a> 6 Oncol Lett 12 2 Aug 2016 JOURNAL</p> <p>ARTICLE <a href="http://www.ncbi.nlm.nih.gov/entrez/query.fcgi?cmd=Retrieve&amp;db=pubmed&amp;dopt=Abstract&amp;list_uids=27251589">http://www.ncbi.nlm.nih.gov/entrez/query.fcgi?cmd=Retrieve&amp;db=pubmed&amp;dopt=Abstract&amp;list_uids=27251589</a> 6 Sci Rep 6   2016 Journal</p> <p>Article <a href="http://www.ncbi.nlm.nih.gov/entrez/query.fcgi?cmd=Retrieve&amp;db=pubmed&amp;dopt=Abstract&amp;list_uids=27303300">http://www.ncbi.nlm.nih.gov/entrez/query.fcgi?cmd=Retrieve&amp;db=pubmed&amp;dopt=Abstract&amp;list_uids=27303300</a> 6 Front Pharmacol 7   2016 Journal</p> <p>Article <a href="http://www.ncbi.nlm.nih.gov/entrez/query.fcgi?cmd=Retrieve&amp;db=pubmed&amp;dopt=Abstract&amp;list_uids=27383307">http://www.ncbi.nlm.nih.gov/entrez/query.fcgi?cmd=Retrieve&amp;db=pubmed&amp;dopt=Abstract&amp;list_uids=27383307</a> 6 Eur Rev Med Pharmacol Sci 20 12 Jun 2016 Journal</p> <p>Article <a href="http://www.ncbi.nlm.nih.gov/entrez/query.fcgi?cmd=Retrieve&amp;db=pubmed&amp;dopt=Abstract&amp;list_uids=27289010">http://www.ncbi.nlm.nih.gov/entrez/query.fcgi?cmd=Retrieve&amp;db=pubmed&amp;dopt=Abstract&amp;list_uids=27289010</a> 6 Exp Mol Pathol 101 1 Aug 2016 Journal</p> <p>Article <a href="http://www.ncbi.nlm.nih.gov/entrez/query.fcgi?cmd=Retrieve&amp;db=pubmed&amp;dopt=Abstract&amp;list_uids=27251789">http://www.ncbi.nlm.nih.gov/entrez/query.fcgi?cmd=Retrieve&amp;db=pubmed&amp;dopt=Abstract&amp;list_uids=27251789</a> 6 J Invest Dermatol   May 2016 JOURNAL</p> <p>ARTICLE <a href="http://www.ncbi.nlm.nih.gov/entrez/query.fcgi?cmd=Retrieve&amp;db=pubmed&amp;dopt=Abstract&amp;list_uids=27578985">http://www.ncbi.nlm.nih.gov/entrez/query.fcgi?cmd=Retrieve&amp;db=pubmed&amp;dopt=Abstract&amp;list_uids=27578985</a> 6 Onco Targets Ther 9   2016 Journal</p> <p>Article <a href="http://www.ncbi.nlm.nih.gov/entrez/query.fcgi?cmd=Retrieve&amp;db=pubmed&amp;dopt=Abstract&amp;list_uids=27491275">http://www.ncbi.nlm.nih.gov/entrez/query.fcgi?cmd=Retrieve&amp;db=pubmed&amp;dopt=Abstract&amp;list_uids=27491275</a> 6 Matrix Biol   Aug 2016 REVIEW, JOURNAL</p> <p>ARTICLE <a href="http://www.ncbi.nlm.nih.gov/entrez/query.fcgi?cmd=Retrieve&amp;db=pubmed&amp;dopt=Abstract&amp;list_uids=27588482">http://www.ncbi.nlm.nih.gov/entrez/query.fcgi?cmd=Retrieve&amp;db=pubmed&amp;dopt=Abstract&amp;list_uids=27588482</a> 6 Oncotarget   Aug 2016 JOURNAL</p> <p>ARTICLE <a href="http://www.ncbi.nlm.nih.gov/entrez/query.fcgi?cmd=Retrieve&amp;db=pubmed&amp;dopt=Abstract&amp;list_uids=27551764">http://www.ncbi.nlm.nih.gov/entrez/query.fcgi?cmd=Retrieve&amp;db=pubmed&amp;dopt=Abstract&amp;list_uids=27551764</a> 6 Biomed Pharmacother 83  Aug 2016 JOURNAL ARTICLE</p> |
| sox3  | src        | <a href="http://www.ncbi.nlm.nih.gov/entrez/query.fcgi?cmd=Retrieve&amp;db=pubmed&amp;dopt=Abstract&amp;list_uids=27251670">http://www.ncbi.nlm.nih.gov/entrez/query.fcgi?cmd=Retrieve&amp;db=pubmed&amp;dopt=Abstract&amp;list_uids=27251670</a>  6 Tumour Biol   Jun 2016 JOURNAL ARTICLE                                                                                                                                                                                                                                                                                                                                                                                                                                                                                                                                                                                                                                                                                                                                                                                                                                                                                                                                                                                                                                                                                                                                                                                                                                                                                                                                                                                                                                                                                                                                                                                                                                                                                                                                                                                                                                                                                                                                                                                                                                                                                                                                                                                                                                                                                                                                                                                                                                                                                                                                                                                                                                                                                                                                                                                                                                                                                                                                                                                                                                                                                                                                                                                                                                                                                                                                                                                                                                                                                                                                                                                                                                                                                                                                                                                                                                                                                                                                                                                                          |
| nras  | mirnlet 7e | <a href="http://www.ncbi.nlm.nih.gov/entrez/query.fcgi?cmd=Retrieve&amp;db=pubmed&amp;dopt=Abstract&amp;list_uids=27556696">http://www.ncbi.nlm.nih.gov/entrez/query.fcgi?cmd=Retrieve&amp;db=pubmed&amp;dopt=Abstract&amp;list_uids=27556696</a>  6 Oncotarget   Aug 2016 JOURNAL ARTICLE                                                                                                                                                                                                                                                                                                                                                                                                                                                                                                                                                                                                                                                                                                                                                                                                                                                                                                                                                                                                                                                                                                                                                                                                                                                                                                                                                                                                                                                                                                                                                                                                                                                                                                                                                                                                                                                                                                                                                                                                                                                                                                                                                                                                                                                                                                                                                                                                                                                                                                                                                                                                                                                                                                                                                                                                                                                                                                                                                                                                                                                                                                                                                                                                                                                                                                                                                                                                                                                                                                                                                                                                                                                                                                                                                                                                                                                                                                                                                                                                           |
| mmp14 | vegfa      | <a href="http://www.ncbi.nlm.nih.gov/entrez/query.fcgi?cmd=Retrieve&amp;db=pubmed&amp;dopt=Abstract&amp;list_uids=27491275">http://www.ncbi.nlm.nih.gov/entrez/query.fcgi?cmd=Retrieve&amp;db=pubmed&amp;dopt=Abstract&amp;list_uids=27491275</a>  6 Matrix Biol   Aug 2016 REVIEW, JOURNAL ARTICLE                                                                                                                                                                                                                                                                                                                                                                                                                                                                                                                                                                                                                                                                                                                                                                                                                                                                                                                                                                                                                                                                                                                                                                                                                                                                                                                                                                                                                                                                                                                                                                                                                                                                                                                                                                                                                                                                                                                                                                                                                                                                                                                                                                                                                                                                                                                                                                                                                                                                                                                                                                                                                                                                                                                                                                                                                                                                                                                                                                                                                                                                                                                                                                                                                                                                                                                                                                                                                                                                                                                                                                                                                                                                                                                                                                                                                                                                                                                                                                                                  |
| mmp14 | mmp13      | <a href="http://www.ncbi.nlm.nih.gov/entrez/query.fcgi?cmd=Retrieve&amp;db=pubmed&amp;dopt=Abstract&amp;list_uids=27600927">http://www.ncbi.nlm.nih.gov/entrez/query.fcgi?cmd=Retrieve&amp;db=pubmed&amp;dopt=Abstract&amp;list_uids=27600927</a>  6 J Dermatol Sci   Jun 2016 JOURNAL ARTICLE                                                                                                                                                                                                                                                                                                                                                                                                                                                                                                                                                                                                                                                                                                                                                                                                                                                                                                                                                                                                                                                                                                                                                                                                                                                                                                                                                                                                                                                                                                                                                                                                                                                                                                                                                                                                                                                                                                                                                                                                                                                                                                                                                                                                                                                                                                                                                                                                                                                                                                                                                                                                                                                                                                                                                                                                                                                                                                                                                                                                                                                                                                                                                                                                                                                                                                                                                                                                                                                                                                                                                                                                                                                                                                                                                                                                                                                                                                                                                                                                       |

|       |         |                                                                                                                                                                                                                                                                                                                                                                                                                                                                                                                                                                                            |
|-------|---------|--------------------------------------------------------------------------------------------------------------------------------------------------------------------------------------------------------------------------------------------------------------------------------------------------------------------------------------------------------------------------------------------------------------------------------------------------------------------------------------------------------------------------------------------------------------------------------------------|
| mmp14 | mmp2    | <a href="http://www.ncbi.nlm.nih.gov/entrez/query.fcgi?cmd=Retrieve&amp;db=pubmed&amp;dopt=Abstract&amp;list_uids=27600927">http://www.ncbi.nlm.nih.gov/entrez/query.fcgi?cmd=Retrieve&amp;db=pubmed&amp;dopt=Abstract&amp;list_uids=27600927</a>  6 J Dermatol Sci   Jun 2016 JOURNAL ARTICLE  <a href="http://www.ncbi.nlm.nih.gov/entrez/query.fcgi?cmd=Retrieve&amp;db=pubmed&amp;dopt=Abstract&amp;list_uids=27613828">http://www.ncbi.nlm.nih.gov/entrez/query.fcgi?cmd=Retrieve&amp;db=pubmed&amp;dopt=Abstract&amp;list_uids=27613828</a>  6 Oncotarget   Aug 2016 JOURNAL ARTICLE |
| alpl  | mmp14   | <a href="http://www.ncbi.nlm.nih.gov/entrez/query.fcgi?cmd=Retrieve&amp;db=pubmed&amp;dopt=Abstract&amp;list_uids=27255086">http://www.ncbi.nlm.nih.gov/entrez/query.fcgi?cmd=Retrieve&amp;db=pubmed&amp;dopt=Abstract&amp;list_uids=27255086</a>  6 EMBO Rep 17 7 Jul 2016 Journal Article                                                                                                                                                                                                                                                                                                |
| vps39 | mmp14   | <a href="http://www.ncbi.nlm.nih.gov/entrez/query.fcgi?cmd=Retrieve&amp;db=pubmed&amp;dopt=Abstract&amp;list_uids=27255086">http://www.ncbi.nlm.nih.gov/entrez/query.fcgi?cmd=Retrieve&amp;db=pubmed&amp;dopt=Abstract&amp;list_uids=27255086</a>  6 EMBO Rep 17 7 Jul 2016 Journal Article                                                                                                                                                                                                                                                                                                |
| vps39 | alpl    | <a href="http://www.ncbi.nlm.nih.gov/entrez/query.fcgi?cmd=Retrieve&amp;db=pubmed&amp;dopt=Abstract&amp;list_uids=27255086">http://www.ncbi.nlm.nih.gov/entrez/query.fcgi?cmd=Retrieve&amp;db=pubmed&amp;dopt=Abstract&amp;list_uids=27255086</a>  6 EMBO Rep 17 7 Jul 2016 Journal Article                                                                                                                                                                                                                                                                                                |
| rab2a | mmp14   | <a href="http://www.ncbi.nlm.nih.gov/entrez/query.fcgi?cmd=Retrieve&amp;db=pubmed&amp;dopt=Abstract&amp;list_uids=27255086">http://www.ncbi.nlm.nih.gov/entrez/query.fcgi?cmd=Retrieve&amp;db=pubmed&amp;dopt=Abstract&amp;list_uids=27255086</a>  6 EMBO Rep 17 7 Jul 2016 Journal Article                                                                                                                                                                                                                                                                                                |
| agfg1 | rab2a   | <a href="http://www.ncbi.nlm.nih.gov/entrez/query.fcgi?cmd=Retrieve&amp;db=pubmed&amp;dopt=Abstract&amp;list_uids=27255086">http://www.ncbi.nlm.nih.gov/entrez/query.fcgi?cmd=Retrieve&amp;db=pubmed&amp;dopt=Abstract&amp;list_uids=27255086</a>  6 EMBO Rep 17 7 Jul 2016 Journal Article                                                                                                                                                                                                                                                                                                |
| birc3 | hspa5   | <a href="http://www.ncbi.nlm.nih.gov/entrez/query.fcgi?cmd=Retrieve&amp;db=pubmed&amp;dopt=Abstract&amp;list_uids=27256049">http://www.ncbi.nlm.nih.gov/entrez/query.fcgi?cmd=Retrieve&amp;db=pubmed&amp;dopt=Abstract&amp;list_uids=27256049</a>  6 Zhonghua Bing Li Xue Za Zhi 45 6 Jun 2016 English Abstract,Journal Article                                                                                                                                                                                                                                                            |
| frap1 | hspa5   | <a href="http://www.ncbi.nlm.nih.gov/entrez/query.fcgi?cmd=Retrieve&amp;db=pubmed&amp;dopt=Abstract&amp;list_uids=27256049">http://www.ncbi.nlm.nih.gov/entrez/query.fcgi?cmd=Retrieve&amp;db=pubmed&amp;dopt=Abstract&amp;list_uids=27256049</a>  6 Zhonghua Bing Li Xue Za Zhi 45 6 Jun 2016 English Abstract,Journal Article                                                                                                                                                                                                                                                            |
| frap1 | birc3   | <a href="http://www.ncbi.nlm.nih.gov/entrez/query.fcgi?cmd=Retrieve&amp;db=pubmed&amp;dopt=Abstract&amp;list_uids=27256049">http://www.ncbi.nlm.nih.gov/entrez/query.fcgi?cmd=Retrieve&amp;db=pubmed&amp;dopt=Abstract&amp;list_uids=27256049</a>  6 Zhonghua Bing Li Xue Za Zhi 45 6 Jun 2016 English Abstract,Journal Article                                                                                                                                                                                                                                                            |
| frap1 | atp8a2  | <a href="http://www.ncbi.nlm.nih.gov/entrez/query.fcgi?cmd=Retrieve&amp;db=pubmed&amp;dopt=Abstract&amp;list_uids=27335323">http://www.ncbi.nlm.nih.gov/entrez/query.fcgi?cmd=Retrieve&amp;db=pubmed&amp;dopt=Abstract&amp;list_uids=27335323</a>  6 Open Biol 6 6 Jun 2016 Journal Article                                                                                                                                                                                                                                                                                                |
| frap1 | ccr5    | <a href="http://www.ncbi.nlm.nih.gov/entrez/query.fcgi?cmd=Retrieve&amp;db=pubmed&amp;dopt=Abstract&amp;list_uids=27335323">http://www.ncbi.nlm.nih.gov/entrez/query.fcgi?cmd=Retrieve&amp;db=pubmed&amp;dopt=Abstract&amp;list_uids=27335323</a>  6 Open Biol 6 6 Jun 2016 Journal Article                                                                                                                                                                                                                                                                                                |
| frap1 | snord87 | <a href="http://www.ncbi.nlm.nih.gov/entrez/query.fcgi?cmd=Retrieve&amp;db=pubmed&amp;dopt=Abstract&amp;list_uids=27394418">http://www.ncbi.nlm.nih.gov/entrez/query.fcgi?cmd=Retrieve&amp;db=pubmed&amp;dopt=Abstract&amp;list_uids=27394418</a>  6 Neurochem Res   Jul 2016 JOURNAL ARTICLE                                                                                                                                                                                                                                                                                              |
| frap1 | mapk14  | <a href="http://www.ncbi.nlm.nih.gov/entrez/query.fcgi?cmd=Retrieve&amp;db=pubmed&amp;dopt=Abstract&amp;list_uids=27394418">http://www.ncbi.nlm.nih.gov/entrez/query.fcgi?cmd=Retrieve&amp;db=pubmed&amp;dopt=Abstract&amp;list_uids=27394418</a>  6 Neurochem Res   Jul 2016 JOURNAL ARTICLE                                                                                                                                                                                                                                                                                              |
| frap1 | il13    | <a href="http://www.ncbi.nlm.nih.gov/entrez/query.fcgi?cmd=Retrieve&amp;db=pubmed&amp;dopt=Abstract&amp;list_uids=27424080">http://www.ncbi.nlm.nih.gov/entrez/query.fcgi?cmd=Retrieve&amp;db=pubmed&amp;dopt=Abstract&amp;list_uids=27424080</a>  6 Int Immunopharmacol 39  Oct 2016 Journal Article                                                                                                                                                                                                                                                                                      |
| frap1 | tp53    | <a href="http://www.ncbi.nlm.nih.gov/entrez/query.fcgi?cmd=Retrieve&amp;db=pubmed&amp;dopt=Abstract&amp;list_uids=27499479">http://www.ncbi.nlm.nih.gov/entrez/query.fcgi?cmd=Retrieve&amp;db=pubmed&amp;dopt=Abstract&amp;list_uids=27499479</a>  6 Int J Oncol   Aug 2016 JOURNAL ARTICLE                                                                                                                                                                                                                                                                                                |
| frap1 | prdx2   | <a href="http://www.ncbi.nlm.nih.gov/entrez/query.fcgi?cmd=Retrieve&amp;db=pubmed&amp;dopt=Abstract&amp;list_uids=27507059">http://www.ncbi.nlm.nih.gov/entrez/query.fcgi?cmd=Retrieve&amp;db=pubmed&amp;dopt=Abstract&amp;list_uids=27507059</a>  6 Oncotarget   Aug 2016 JOURNAL ARTICLE                                                                                                                                                                                                                                                                                                 |
| frap1 | hdac9   | <a href="http://www.ncbi.nlm.nih.gov/entrez/query.fcgi?cmd=Retrieve&amp;db=pubmed&amp;dopt=Abstract&amp;list_uids=27507059">http://www.ncbi.nlm.nih.gov/entrez/query.fcgi?cmd=Retrieve&amp;db=pubmed&amp;dopt=Abstract&amp;list_uids=27507059</a>  6 Oncotarget   Aug 2016 JOURNAL ARTICLE                                                                                                                                                                                                                                                                                                 |

|        |        |                                                                                                                                                                                                                                                                                                                                 |
|--------|--------|---------------------------------------------------------------------------------------------------------------------------------------------------------------------------------------------------------------------------------------------------------------------------------------------------------------------------------|
| cdkn2b | hspa5  | <a href="http://www.ncbi.nlm.nih.gov/entrez/query.fcgi?cmd=Retrieve&amp;db=pubmed&amp;dopt=Abstract&amp;list_uids=27256049">http://www.ncbi.nlm.nih.gov/entrez/query.fcgi?cmd=Retrieve&amp;db=pubmed&amp;dopt=Abstract&amp;list_uids=27256049</a>  6 Zhonghua Bing Li Xue Za Zhi 45 6 Jun 2016 English Abstract,Journal Article |
| cdkn2b | birc3  | <a href="http://www.ncbi.nlm.nih.gov/entrez/query.fcgi?cmd=Retrieve&amp;db=pubmed&amp;dopt=Abstract&amp;list_uids=27256049">http://www.ncbi.nlm.nih.gov/entrez/query.fcgi?cmd=Retrieve&amp;db=pubmed&amp;dopt=Abstract&amp;list_uids=27256049</a>  6 Zhonghua Bing Li Xue Za Zhi 45 6 Jun 2016 English Abstract,Journal Article |
| cdkn2b | frap1  | <a href="http://www.ncbi.nlm.nih.gov/entrez/query.fcgi?cmd=Retrieve&amp;db=pubmed&amp;dopt=Abstract&amp;list_uids=27256049">http://www.ncbi.nlm.nih.gov/entrez/query.fcgi?cmd=Retrieve&amp;db=pubmed&amp;dopt=Abstract&amp;list_uids=27256049</a>  6 Zhonghua Bing Li Xue Za Zhi 45 6 Jun 2016 English Abstract,Journal Article |
| met    | egr1   | <a href="http://www.ncbi.nlm.nih.gov/entrez/query.fcgi?cmd=Retrieve&amp;db=pubmed&amp;dopt=Abstract&amp;list_uids=27530187">http://www.ncbi.nlm.nih.gov/entrez/query.fcgi?cmd=Retrieve&amp;db=pubmed&amp;dopt=Abstract&amp;list_uids=27530187</a>  6 Hepatology  Aug 2016 JOURNAL ARTICLE                                       |
| met    | akt1   | <a href="http://www.ncbi.nlm.nih.gov/entrez/query.fcgi?cmd=Retrieve&amp;db=pubmed&amp;dopt=Abstract&amp;list_uids=27530187">http://www.ncbi.nlm.nih.gov/entrez/query.fcgi?cmd=Retrieve&amp;db=pubmed&amp;dopt=Abstract&amp;list_uids=27530187</a>  6 Hepatology  Aug 2016 JOURNAL ARTICLE                                       |
| met    | ephb2  | <a href="http://www.ncbi.nlm.nih.gov/entrez/query.fcgi?cmd=Retrieve&amp;db=pubmed&amp;dopt=Abstract&amp;list_uids=27530187">http://www.ncbi.nlm.nih.gov/entrez/query.fcgi?cmd=Retrieve&amp;db=pubmed&amp;dopt=Abstract&amp;list_uids=27530187</a>  6 Hepatology  Aug 2016 JOURNAL ARTICLE                                       |
| sardh  | met    | <a href="http://www.ncbi.nlm.nih.gov/entrez/query.fcgi?cmd=Retrieve&amp;db=pubmed&amp;dopt=Abstract&amp;list_uids=27258622">http://www.ncbi.nlm.nih.gov/entrez/query.fcgi?cmd=Retrieve&amp;db=pubmed&amp;dopt=Abstract&amp;list_uids=27258622</a>  6 Eur J Med Chem 118  Apr 2016 JOURNAL ARTICLE                               |
| mzf1   | mmp14  | <a href="http://www.ncbi.nlm.nih.gov/entrez/query.fcgi?cmd=Retrieve&amp;db=pubmed&amp;dopt=Abstract&amp;list_uids=27259238">http://www.ncbi.nlm.nih.gov/entrez/query.fcgi?cmd=Retrieve&amp;db=pubmed&amp;dopt=Abstract&amp;list_uids=27259238</a>  6 Oncotarget  May 2016 JOURNAL ARTICLE                                       |
| snai2  | nono   | <a href="http://www.ncbi.nlm.nih.gov/entrez/query.fcgi?cmd=Retrieve&amp;db=pubmed&amp;dopt=Abstract&amp;list_uids=27259250">http://www.ncbi.nlm.nih.gov/entrez/query.fcgi?cmd=Retrieve&amp;db=pubmed&amp;dopt=Abstract&amp;list_uids=27259250</a>  6 Oncotarget  May 2016 JOURNAL ARTICLE                                       |
| snai2  | igfbp7 | <a href="http://www.ncbi.nlm.nih.gov/entrez/query.fcgi?cmd=Retrieve&amp;db=pubmed&amp;dopt=Abstract&amp;list_uids=27259250">http://www.ncbi.nlm.nih.gov/entrez/query.fcgi?cmd=Retrieve&amp;db=pubmed&amp;dopt=Abstract&amp;list_uids=27259250</a>  6 Oncotarget  May 2016 JOURNAL ARTICLE                                       |
| igfbp7 | nono   | <a href="http://www.ncbi.nlm.nih.gov/entrez/query.fcgi?cmd=Retrieve&amp;db=pubmed&amp;dopt=Abstract&amp;list_uids=27259250">http://www.ncbi.nlm.nih.gov/entrez/query.fcgi?cmd=Retrieve&amp;db=pubmed&amp;dopt=Abstract&amp;list_uids=27259250</a>  6 Oncotarget  May 2016 JOURNAL ARTICLE                                       |
| ptbp1  | nono   | <a href="http://www.ncbi.nlm.nih.gov/entrez/query.fcgi?cmd=Retrieve&amp;db=pubmed&amp;dopt=Abstract&amp;list_uids=27259250">http://www.ncbi.nlm.nih.gov/entrez/query.fcgi?cmd=Retrieve&amp;db=pubmed&amp;dopt=Abstract&amp;list_uids=27259250</a>  6 Oncotarget  May 2016 JOURNAL ARTICLE                                       |
| ptbp1  | igfbp7 | <a href="http://www.ncbi.nlm.nih.gov/entrez/query.fcgi?cmd=Retrieve&amp;db=pubmed&amp;dopt=Abstract&amp;list_uids=27259250">http://www.ncbi.nlm.nih.gov/entrez/query.fcgi?cmd=Retrieve&amp;db=pubmed&amp;dopt=Abstract&amp;list_uids=27259250</a>  6 Oncotarget  May 2016 JOURNAL ARTICLE                                       |
| il8    | hm13   | <a href="http://www.ncbi.nlm.nih.gov/entrez/query.fcgi?cmd=Retrieve&amp;db=pubmed&amp;dopt=Abstract&amp;list_uids=27337492">http://www.ncbi.nlm.nih.gov/entrez/query.fcgi?cmd=Retrieve&amp;db=pubmed&amp;dopt=Abstract&amp;list_uids=27337492</a>  6 J Appl Microbiol 121 3 Sep 2016 Journal Article                            |
| il8    | stat3  | <a href="http://www.ncbi.nlm.nih.gov/entrez/query.fcgi?cmd=Retrieve&amp;db=pubmed&amp;dopt=Abstract&amp;list_uids=27391430">http://www.ncbi.nlm.nih.gov/entrez/query.fcgi?cmd=Retrieve&amp;db=pubmed&amp;dopt=Abstract&amp;list_uids=27391430</a>  6 Oncotarget  Jul 2016 JOURNAL ARTICLE                                       |
| il8    | mmp9   | <a href="http://www.ncbi.nlm.nih.gov/entrez/query.fcgi?cmd=Retrieve&amp;db=pubmed&amp;dopt=Abstract&amp;list_uids=27398151">http://www.ncbi.nlm.nih.gov/entrez/query.fcgi?cmd=Retrieve&amp;db=pubmed&amp;dopt=Abstract&amp;list_uids=27398151</a>  6 Am J Transl Res 8 6  2016 Journal Article                                  |
| il8    | notch1 | <a href="http://www.ncbi.nlm.nih.gov/entrez/query.fcgi?cmd=Retrieve&amp;db=pubmed&amp;dopt=Abstract&amp;list_uids=27398151">http://www.ncbi.nlm.nih.gov/entrez/query.fcgi?cmd=Retrieve&amp;db=pubmed&amp;dopt=Abstract&amp;list_uids=27398151</a>  6 Am J Transl Res 8 6  2016 Journal Article                                  |
| il8    | vegfa  | <a href="http://www.ncbi.nlm.nih.gov/entrez/query.fcgi?cmd=Retrieve&amp;db=pubmed&amp;dopt=Abstract&amp;list_uids=27391430">http://www.ncbi.nlm.nih.gov/entrez/query.fcgi?cmd=Retrieve&amp;db=pubmed&amp;dopt=Abstract&amp;list_uids=27391430</a>  6 Oncotarget  Jul 2016 JOURNAL                                               |

|       |         |                                                                                                                                                                                                                                                                                                                                                                                                                                                                                                                                                                                                             |
|-------|---------|-------------------------------------------------------------------------------------------------------------------------------------------------------------------------------------------------------------------------------------------------------------------------------------------------------------------------------------------------------------------------------------------------------------------------------------------------------------------------------------------------------------------------------------------------------------------------------------------------------------|
|       |         | ARTICLE  <a href="http://www.ncbi.nlm.nih.gov/entrez/query.fcgi?cmd=Retrieve&amp;db=pubmed&amp;dopt=Abstract&amp;list_uids=27398151">http://www.ncbi.nlm.nih.gov/entrez/query.fcgi?cmd=Retrieve&amp;db=pubmed&amp;dopt=Abstract&amp;list_uids=27398151</a>  6 Am J Transl Res 8 6  2016 Journal Article                                                                                                                                                                                                                                                                                                     |
| il8   | il10    | <a href="http://www.ncbi.nlm.nih.gov/entrez/query.fcgi?cmd=Retrieve&amp;db=pubmed&amp;dopt=Abstract&amp;list_uids=27513864">http://www.ncbi.nlm.nih.gov/entrez/query.fcgi?cmd=Retrieve&amp;db=pubmed&amp;dopt=Abstract&amp;list_uids=27513864</a>  6 PLoS One 11 8  2016 Journal Article                                                                                                                                                                                                                                                                                                                    |
| il8   | vcan    | <a href="http://www.ncbi.nlm.nih.gov/entrez/query.fcgi?cmd=Retrieve&amp;db=pubmed&amp;dopt=Abstract&amp;list_uids=27513864">http://www.ncbi.nlm.nih.gov/entrez/query.fcgi?cmd=Retrieve&amp;db=pubmed&amp;dopt=Abstract&amp;list_uids=27513864</a>  6 PLoS One 11 8  2016 Journal Article                                                                                                                                                                                                                                                                                                                    |
| il8   | cd80    | <a href="http://www.ncbi.nlm.nih.gov/entrez/query.fcgi?cmd=Retrieve&amp;db=pubmed&amp;dopt=Abstract&amp;list_uids=27513864">http://www.ncbi.nlm.nih.gov/entrez/query.fcgi?cmd=Retrieve&amp;db=pubmed&amp;dopt=Abstract&amp;list_uids=27513864</a>  6 PLoS One 11 8  2016 Journal Article                                                                                                                                                                                                                                                                                                                    |
| il8   | il6     | <a href="http://www.ncbi.nlm.nih.gov/entrez/query.fcgi?cmd=Retrieve&amp;db=pubmed&amp;dopt=Abstract&amp;list_uids=27558278">http://www.ncbi.nlm.nih.gov/entrez/query.fcgi?cmd=Retrieve&amp;db=pubmed&amp;dopt=Abstract&amp;list_uids=27558278</a>  6 J Periodontal Res   Aug 2016 JOURNAL ARTICLE  <a href="http://www.ncbi.nlm.nih.gov/entrez/query.fcgi?cmd=Retrieve&amp;db=pubmed&amp;dopt=Abstract&amp;list_uids=27312487">http://www.ncbi.nlm.nih.gov/entrez/query.fcgi?cmd=Retrieve&amp;db=pubmed&amp;dopt=Abstract&amp;list_uids=27312487</a>  6 Tumour Biol   Jun 2016 JOURNAL ARTICLE              |
| il8   | lepr    | <a href="http://www.ncbi.nlm.nih.gov/entrez/query.fcgi?cmd=Retrieve&amp;db=pubmed&amp;dopt=Abstract&amp;list_uids=27588409">http://www.ncbi.nlm.nih.gov/entrez/query.fcgi?cmd=Retrieve&amp;db=pubmed&amp;dopt=Abstract&amp;list_uids=27588409</a>  6 Oncotarget   Aug 2016 JOURNAL ARTICLE                                                                                                                                                                                                                                                                                                                  |
| il8   | mapk14  | <a href="http://www.ncbi.nlm.nih.gov/entrez/query.fcgi?cmd=Retrieve&amp;db=pubmed&amp;dopt=Abstract&amp;list_uids=27588409">http://www.ncbi.nlm.nih.gov/entrez/query.fcgi?cmd=Retrieve&amp;db=pubmed&amp;dopt=Abstract&amp;list_uids=27588409</a>  6 Oncotarget   Aug 2016 JOURNAL ARTICLE                                                                                                                                                                                                                                                                                                                  |
| il8   | ephb2   | <a href="http://www.ncbi.nlm.nih.gov/entrez/query.fcgi?cmd=Retrieve&amp;db=pubmed&amp;dopt=Abstract&amp;list_uids=27588409">http://www.ncbi.nlm.nih.gov/entrez/query.fcgi?cmd=Retrieve&amp;db=pubmed&amp;dopt=Abstract&amp;list_uids=27588409</a>  6 Oncotarget   Aug 2016 JOURNAL ARTICLE                                                                                                                                                                                                                                                                                                                  |
| usp21 | il8     | <a href="http://www.ncbi.nlm.nih.gov/entrez/query.fcgi?cmd=Retrieve&amp;db=pubmed&amp;dopt=Abstract&amp;list_uids=27259257">http://www.ncbi.nlm.nih.gov/entrez/query.fcgi?cmd=Retrieve&amp;db=pubmed&amp;dopt=Abstract&amp;list_uids=27259257</a>  6 Oncotarget   May 2016 JOURNAL ARTICLE                                                                                                                                                                                                                                                                                                                  |
| usp21 | xrcc1   | <a href="http://www.ncbi.nlm.nih.gov/entrez/query.fcgi?cmd=Retrieve&amp;db=pubmed&amp;dopt=Abstract&amp;list_uids=27259257">http://www.ncbi.nlm.nih.gov/entrez/query.fcgi?cmd=Retrieve&amp;db=pubmed&amp;dopt=Abstract&amp;list_uids=27259257</a>  6 Oncotarget   May 2016 JOURNAL ARTICLE                                                                                                                                                                                                                                                                                                                  |
| xrcc1 | mirn182 | <a href="http://www.ncbi.nlm.nih.gov/entrez/query.fcgi?cmd=Retrieve&amp;db=pubmed&amp;dopt=Abstract&amp;list_uids=27468875">http://www.ncbi.nlm.nih.gov/entrez/query.fcgi?cmd=Retrieve&amp;db=pubmed&amp;dopt=Abstract&amp;list_uids=27468875</a>  6 Neoplasma 63 5 Jul 2016 JOURNAL ARTICLE                                                                                                                                                                                                                                                                                                                |
| vegfa | egfr    | <a href="http://www.ncbi.nlm.nih.gov/entrez/query.fcgi?cmd=Retrieve&amp;db=pubmed&amp;dopt=Abstract&amp;list_uids=27286795">http://www.ncbi.nlm.nih.gov/entrez/query.fcgi?cmd=Retrieve&amp;db=pubmed&amp;dopt=Abstract&amp;list_uids=27286795</a>  6 Neuro Oncol   Jun 2016 JOURNAL ARTICLE                                                                                                                                                                                                                                                                                                                 |
| vegfa | mapk3   | <a href="http://www.ncbi.nlm.nih.gov/entrez/query.fcgi?cmd=Retrieve&amp;db=pubmed&amp;dopt=Abstract&amp;list_uids=27297262">http://www.ncbi.nlm.nih.gov/entrez/query.fcgi?cmd=Retrieve&amp;db=pubmed&amp;dopt=Abstract&amp;list_uids=27297262</a>  6 Clin Exp Pharmacol Physiol 43 10 Oct 2016 Journal Article                                                                                                                                                                                                                                                                                              |
| vegfa | ptk2    | <a href="http://www.ncbi.nlm.nih.gov/entrez/query.fcgi?cmd=Retrieve&amp;db=pubmed&amp;dopt=Abstract&amp;list_uids=27297262">http://www.ncbi.nlm.nih.gov/entrez/query.fcgi?cmd=Retrieve&amp;db=pubmed&amp;dopt=Abstract&amp;list_uids=27297262</a>  6 Clin Exp Pharmacol Physiol 43 10 Oct 2016 Journal Article                                                                                                                                                                                                                                                                                              |
| vegfa | src     | <a href="http://www.ncbi.nlm.nih.gov/entrez/query.fcgi?cmd=Retrieve&amp;db=pubmed&amp;dopt=Abstract&amp;list_uids=27297262">http://www.ncbi.nlm.nih.gov/entrez/query.fcgi?cmd=Retrieve&amp;db=pubmed&amp;dopt=Abstract&amp;list_uids=27297262</a>  6 Clin Exp Pharmacol Physiol 43 10 Oct 2016 Journal Article  <a href="http://www.ncbi.nlm.nih.gov/entrez/query.fcgi?cmd=Retrieve&amp;db=pubmed&amp;dopt=Abstract&amp;list_uids=27286795">http://www.ncbi.nlm.nih.gov/entrez/query.fcgi?cmd=Retrieve&amp;db=pubmed&amp;dopt=Abstract&amp;list_uids=27286795</a>  6 Neuro Oncol   Jun 2016 JOURNAL ARTICLE |
| vegfa | il17a   | <a href="http://www.ncbi.nlm.nih.gov/entrez/query.fcgi?cmd=Retrieve&amp;db=pubmed&amp;dopt=Abstract&amp;list_uids=27353107">http://www.ncbi.nlm.nih.gov/entrez/query.fcgi?cmd=Retrieve&amp;db=pubmed&amp;dopt=Abstract&amp;list_uids=27353107</a>  6 Zhonghua Wei Chang Wai Ke Za Zhi 19 6 Jun 2016 English Abstract,Journal Article                                                                                                                                                                                                                                                                        |

|       |        |                                                                                                                                                                                                                                                                                                                                                                                                                                                                                                                                                                                                                                                                                                                                                                                                                                                                                          |
|-------|--------|------------------------------------------------------------------------------------------------------------------------------------------------------------------------------------------------------------------------------------------------------------------------------------------------------------------------------------------------------------------------------------------------------------------------------------------------------------------------------------------------------------------------------------------------------------------------------------------------------------------------------------------------------------------------------------------------------------------------------------------------------------------------------------------------------------------------------------------------------------------------------------------|
| vegfa | mmp9   | <a href="http://www.ncbi.nlm.nih.gov/entrez/query.fcgi?cmd=Retrieve&amp;db=pubmed&amp;dopt=Abstract&amp;list_uids=27398151">http://www.ncbi.nlm.nih.gov/entrez/query.fcgi?cmd=Retrieve&amp;db=pubmed&amp;dopt=Abstract&amp;list_uids=27398151</a>  6 Am J Transl Res 8 6  2016 Journal Article  <a href="http://www.ncbi.nlm.nih.gov/entrez/query.fcgi?cmd=Retrieve&amp;db=pubmed&amp;dopt=Abstract&amp;list_uids=27353107">http://www.ncbi.nlm.nih.gov/entrez/query.fcgi?cmd=Retrieve&amp;db=pubmed&amp;dopt=Abstract&amp;list_uids=27353107</a>  6 Zhonghua Wei Chang Wai Ke Za Zhi 19 6 Jun 2016 English Abstract,Journal Article                                                                                                                                                                                                                                                     |
| vegfa | notch1 | <a href="http://www.ncbi.nlm.nih.gov/entrez/query.fcgi?cmd=Retrieve&amp;db=pubmed&amp;dopt=Abstract&amp;list_uids=27398151">http://www.ncbi.nlm.nih.gov/entrez/query.fcgi?cmd=Retrieve&amp;db=pubmed&amp;dopt=Abstract&amp;list_uids=27398151</a>  6 Am J Transl Res 8 6  2016 Journal Article                                                                                                                                                                                                                                                                                                                                                                                                                                                                                                                                                                                           |
| vegfa | hccs   | <a href="http://www.ncbi.nlm.nih.gov/entrez/query.fcgi?cmd=Retrieve&amp;db=pubmed&amp;dopt=Abstract&amp;list_uids=27449032">http://www.ncbi.nlm.nih.gov/entrez/query.fcgi?cmd=Retrieve&amp;db=pubmed&amp;dopt=Abstract&amp;list_uids=27449032</a>  6 Tumour Biol   Jul 2016 JOURNAL ARTICLE                                                                                                                                                                                                                                                                                                                                                                                                                                                                                                                                                                                              |
| vegfa | akt1   | <a href="http://www.ncbi.nlm.nih.gov/entrez/query.fcgi?cmd=Retrieve&amp;db=pubmed&amp;dopt=Abstract&amp;list_uids=27297262">http://www.ncbi.nlm.nih.gov/entrez/query.fcgi?cmd=Retrieve&amp;db=pubmed&amp;dopt=Abstract&amp;list_uids=27297262</a>  6 Clin Exp Pharmacol Physiol 43 10 Oct 2016 Journal Article  <a href="http://www.ncbi.nlm.nih.gov/entrez/query.fcgi?cmd=Retrieve&amp;db=pubmed&amp;dopt=Abstract&amp;list_uids=27507763">http://www.ncbi.nlm.nih.gov/entrez/query.fcgi?cmd=Retrieve&amp;db=pubmed&amp;dopt=Abstract&amp;list_uids=27507763</a>  6 Sci Rep 6   2016 Journal Article                                                                                                                                                                                                                                                                                    |
| vegfa | ephb2  | <a href="http://www.ncbi.nlm.nih.gov/entrez/query.fcgi?cmd=Retrieve&amp;db=pubmed&amp;dopt=Abstract&amp;list_uids=27569654">http://www.ncbi.nlm.nih.gov/entrez/query.fcgi?cmd=Retrieve&amp;db=pubmed&amp;dopt=Abstract&amp;list_uids=27569654</a>  6 Cancer Lett 382 1 Aug 2016 JOURNAL ARTICLE                                                                                                                                                                                                                                                                                                                                                                                                                                                                                                                                                                                          |
| hk2   | vegfa  | <a href="http://www.ncbi.nlm.nih.gov/entrez/query.fcgi?cmd=Retrieve&amp;db=pubmed&amp;dopt=Abstract&amp;list_uids=27259263">http://www.ncbi.nlm.nih.gov/entrez/query.fcgi?cmd=Retrieve&amp;db=pubmed&amp;dopt=Abstract&amp;list_uids=27259263</a>  6 Oncotarget   Jun 2016 JOURNAL ARTICLE                                                                                                                                                                                                                                                                                                                                                                                                                                                                                                                                                                                               |
| jak2  | ptpn6  | <a href="http://www.ncbi.nlm.nih.gov/entrez/query.fcgi?cmd=Retrieve&amp;db=pubmed&amp;dopt=Abstract&amp;list_uids=27259268">http://www.ncbi.nlm.nih.gov/entrez/query.fcgi?cmd=Retrieve&amp;db=pubmed&amp;dopt=Abstract&amp;list_uids=27259268</a>  6 Oncotarget   Jun 2016 JOURNAL ARTICLE                                                                                                                                                                                                                                                                                                                                                                                                                                                                                                                                                                                               |
| jak2  | trim29 | <a href="http://www.ncbi.nlm.nih.gov/entrez/query.fcgi?cmd=Retrieve&amp;db=pubmed&amp;dopt=Abstract&amp;list_uids=27430345">http://www.ncbi.nlm.nih.gov/entrez/query.fcgi?cmd=Retrieve&amp;db=pubmed&amp;dopt=Abstract&amp;list_uids=27430345</a>  6 Oncol Rep 36 3 Sep 2016 Journal Article                                                                                                                                                                                                                                                                                                                                                                                                                                                                                                                                                                                             |
| jak2  | stat3  | <a href="http://www.ncbi.nlm.nih.gov/entrez/query.fcgi?cmd=Retrieve&amp;db=pubmed&amp;dopt=Abstract&amp;list_uids=27471397">http://www.ncbi.nlm.nih.gov/entrez/query.fcgi?cmd=Retrieve&amp;db=pubmed&amp;dopt=Abstract&amp;list_uids=27471397</a>  6 Oncotargets Ther 9   2016 Journal Article  <a href="http://www.ncbi.nlm.nih.gov/entrez/query.fcgi?cmd=Retrieve&amp;db=pubmed&amp;dopt=Abstract&amp;list_uids=27430345">http://www.ncbi.nlm.nih.gov/entrez/query.fcgi?cmd=Retrieve&amp;db=pubmed&amp;dopt=Abstract&amp;list_uids=27430345</a>  6 Oncol Rep 36 3 Sep 2016 Journal Article  <a href="http://www.ncbi.nlm.nih.gov/entrez/query.fcgi?cmd=Retrieve&amp;db=pubmed&amp;dopt=Abstract&amp;list_uids=27259268">http://www.ncbi.nlm.nih.gov/entrez/query.fcgi?cmd=Retrieve&amp;db=pubmed&amp;dopt=Abstract&amp;list_uids=27259268</a>  6 Oncotarget   Jun 2016 JOURNAL ARTICLE |
| jak1  | ptpn6  | <a href="http://www.ncbi.nlm.nih.gov/entrez/query.fcgi?cmd=Retrieve&amp;db=pubmed&amp;dopt=Abstract&amp;list_uids=27259268">http://www.ncbi.nlm.nih.gov/entrez/query.fcgi?cmd=Retrieve&amp;db=pubmed&amp;dopt=Abstract&amp;list_uids=27259268</a>  6 Oncotarget   Jun 2016 JOURNAL ARTICLE                                                                                                                                                                                                                                                                                                                                                                                                                                                                                                                                                                                               |
| jak1  | jak2   | <a href="http://www.ncbi.nlm.nih.gov/entrez/query.fcgi?cmd=Retrieve&amp;db=pubmed&amp;dopt=Abstract&amp;list_uids=27259268">http://www.ncbi.nlm.nih.gov/entrez/query.fcgi?cmd=Retrieve&amp;db=pubmed&amp;dopt=Abstract&amp;list_uids=27259268</a>  6 Oncotarget   Jun 2016 JOURNAL ARTICLE                                                                                                                                                                                                                                                                                                                                                                                                                                                                                                                                                                                               |
| jak1  | stat3  | <a href="http://www.ncbi.nlm.nih.gov/entrez/query.fcgi?cmd=Retrieve&amp;db=pubmed&amp;dopt=Abstract&amp;list_uids=27292026">http://www.ncbi.nlm.nih.gov/entrez/query.fcgi?cmd=Retrieve&amp;db=pubmed&amp;dopt=Abstract&amp;list_uids=27292026</a>  6 Neoplasia 18 6 Jun 2016 Journal Article  <a href="http://www.ncbi.nlm.nih.gov/entrez/query.fcgi?cmd=Retrieve&amp;db=pubmed&amp;dopt=Abstract&amp;list_uids=27259268">http://www.ncbi.nlm.nih.gov/entrez/query.fcgi?cmd=Retrieve&amp;db=pubmed&amp;dopt=Abstract&amp;list_uids=27259268</a>  6 Oncotarget   Jun 2016 JOURNAL ARTICLE                                                                                                                                                                                                                                                                                                 |
| jak1  | src    | <a href="http://www.ncbi.nlm.nih.gov/entrez/query.fcgi?cmd=Retrieve&amp;db=pubmed&amp;dopt=Abstract&amp;list_uids=27458171">http://www.ncbi.nlm.nih.gov/entrez/query.fcgi?cmd=Retrieve&amp;db=pubmed&amp;dopt=Abstract&amp;list_uids=27458171</a>  6 Oncotarget   Jul 2016 JOURNAL ARTICLE                                                                                                                                                                                                                                                                                                                                                                                                                                                                                                                                                                                               |



|       |        |                                                                                                                                                                                                                                                                                                                                                                                                                                                                                                                                                                                                                                                                                                                                                                                                                                                                                                                                                                                                                                                                                                                                                                                                                                                                                                                                                                                                                                                                                                                                                                                                                                                                                                                                                                                                                               |
|-------|--------|-------------------------------------------------------------------------------------------------------------------------------------------------------------------------------------------------------------------------------------------------------------------------------------------------------------------------------------------------------------------------------------------------------------------------------------------------------------------------------------------------------------------------------------------------------------------------------------------------------------------------------------------------------------------------------------------------------------------------------------------------------------------------------------------------------------------------------------------------------------------------------------------------------------------------------------------------------------------------------------------------------------------------------------------------------------------------------------------------------------------------------------------------------------------------------------------------------------------------------------------------------------------------------------------------------------------------------------------------------------------------------------------------------------------------------------------------------------------------------------------------------------------------------------------------------------------------------------------------------------------------------------------------------------------------------------------------------------------------------------------------------------------------------------------------------------------------------|
| stat3 | ptpn6  | <a href="http://www.ncbi.nlm.nih.gov/entrez/query.fcgi?cmd=Retrieve&amp;db=pubmed&amp;dopt=Abstract&amp;list_uids=27259268">http://www.ncbi.nlm.nih.gov/entrez/query.fcgi?cmd=Retrieve&amp;db=pubmed&amp;dopt=Abstract&amp;list_uids=27259268</a>  6 Oncotarget  Jun 2016 JOURNAL ARTICLE                                                                                                                                                                                                                                                                                                                                                                                                                                                                                                                                                                                                                                                                                                                                                                                                                                                                                                                                                                                                                                                                                                                                                                                                                                                                                                                                                                                                                                                                                                                                     |
| stat3 | stat6  | <a href="http://www.ncbi.nlm.nih.gov/entrez/query.fcgi?cmd=Retrieve&amp;db=pubmed&amp;dopt=Abstract&amp;list_uids=27367025">http://www.ncbi.nlm.nih.gov/entrez/query.fcgi?cmd=Retrieve&amp;db=pubmed&amp;dopt=Abstract&amp;list_uids=27367025</a>  6 Oncotarget  Jun 2016 JOURNAL ARTICLE                                                                                                                                                                                                                                                                                                                                                                                                                                                                                                                                                                                                                                                                                                                                                                                                                                                                                                                                                                                                                                                                                                                                                                                                                                                                                                                                                                                                                                                                                                                                     |
| stat3 | il10   | <a href="http://www.ncbi.nlm.nih.gov/entrez/query.fcgi?cmd=Retrieve&amp;db=pubmed&amp;dopt=Abstract&amp;list_uids=27384401">http://www.ncbi.nlm.nih.gov/entrez/query.fcgi?cmd=Retrieve&amp;db=pubmed&amp;dopt=Abstract&amp;list_uids=27384401</a>  6 Sci Rep 6  2016 Journal Article                                                                                                                                                                                                                                                                                                                                                                                                                                                                                                                                                                                                                                                                                                                                                                                                                                                                                                                                                                                                                                                                                                                                                                                                                                                                                                                                                                                                                                                                                                                                          |
| stat3 | bcl2   | <a href="http://www.ncbi.nlm.nih.gov/entrez/query.fcgi?cmd=Retrieve&amp;db=pubmed&amp;dopt=Abstract&amp;list_uids=27415751">http://www.ncbi.nlm.nih.gov/entrez/query.fcgi?cmd=Retrieve&amp;db=pubmed&amp;dopt=Abstract&amp;list_uids=27415751</a>  6 Cancer Biol Ther  Jul 2016 JOURNAL ARTICLE                                                                                                                                                                                                                                                                                                                                                                                                                                                                                                                                                                                                                                                                                                                                                                                                                                                                                                                                                                                                                                                                                                                                                                                                                                                                                                                                                                                                                                                                                                                               |
| stat3 | bcl2l1 | <a href="http://www.ncbi.nlm.nih.gov/entrez/query.fcgi?cmd=Retrieve&amp;db=pubmed&amp;dopt=Abstract&amp;list_uids=27415751">http://www.ncbi.nlm.nih.gov/entrez/query.fcgi?cmd=Retrieve&amp;db=pubmed&amp;dopt=Abstract&amp;list_uids=27415751</a>  6 Cancer Biol Ther  Jul 2016 JOURNAL ARTICLE                                                                                                                                                                                                                                                                                                                                                                                                                                                                                                                                                                                                                                                                                                                                                                                                                                                                                                                                                                                                                                                                                                                                                                                                                                                                                                                                                                                                                                                                                                                               |
| stat3 | myc    | <a href="http://www.ncbi.nlm.nih.gov/entrez/query.fcgi?cmd=Retrieve&amp;db=pubmed&amp;dopt=Abstract&amp;list_uids=27415751">http://www.ncbi.nlm.nih.gov/entrez/query.fcgi?cmd=Retrieve&amp;db=pubmed&amp;dopt=Abstract&amp;list_uids=27415751</a>  6 Cancer Biol Ther  Jul 2016 JOURNAL ARTICLE                                                                                                                                                                                                                                                                                                                                                                                                                                                                                                                                                                                                                                                                                                                                                                                                                                                                                                                                                                                                                                                                                                                                                                                                                                                                                                                                                                                                                                                                                                                               |
| stat3 | trim29 | <a href="http://www.ncbi.nlm.nih.gov/entrez/query.fcgi?cmd=Retrieve&amp;db=pubmed&amp;dopt=Abstract&amp;list_uids=27430345">http://www.ncbi.nlm.nih.gov/entrez/query.fcgi?cmd=Retrieve&amp;db=pubmed&amp;dopt=Abstract&amp;list_uids=27430345</a>  6 Oncol Rep 36 3 Sep 2016 Journal Article                                                                                                                                                                                                                                                                                                                                                                                                                                                                                                                                                                                                                                                                                                                                                                                                                                                                                                                                                                                                                                                                                                                                                                                                                                                                                                                                                                                                                                                                                                                                  |
| stat3 | ddr1   | <a href="http://www.ncbi.nlm.nih.gov/entrez/query.fcgi?cmd=Retrieve&amp;db=pubmed&amp;dopt=Abstract&amp;list_uids=27458446">http://www.ncbi.nlm.nih.gov/entrez/query.fcgi?cmd=Retrieve&amp;db=pubmed&amp;dopt=Abstract&amp;list_uids=27458446</a>  6 Front Microbiol 7  2016 Journal Article,Review                                                                                                                                                                                                                                                                                                                                                                                                                                                                                                                                                                                                                                                                                                                                                                                                                                                                                                                                                                                                                                                                                                                                                                                                                                                                                                                                                                                                                                                                                                                           |
| stat3 | vegfa  | <a href="http://www.ncbi.nlm.nih.gov/entrez/query.fcgi?cmd=Retrieve&amp;db=pubmed&amp;dopt=Abstract&amp;list_uids=27391430">http://www.ncbi.nlm.nih.gov/entrez/query.fcgi?cmd=Retrieve&amp;db=pubmed&amp;dopt=Abstract&amp;list_uids=27391430</a>  6 Oncotarget  Jul 2016 JOURNAL ARTICLE  <a href="http://www.ncbi.nlm.nih.gov/entrez/query.fcgi?cmd=Retrieve&amp;db=pubmed&amp;dopt=Abstract&amp;list_uids=27494878">http://www.ncbi.nlm.nih.gov/entrez/query.fcgi?cmd=Retrieve&amp;db=pubmed&amp;dopt=Abstract&amp;list_uids=27494878</a>  6 Oncotarget  Aug 2016 JOURNAL ARTICLE  <a href="http://www.ncbi.nlm.nih.gov/entrez/query.fcgi?cmd=Retrieve&amp;db=pubmed&amp;dopt=Abstract&amp;list_uids=27415751">http://www.ncbi.nlm.nih.gov/entrez/query.fcgi?cmd=Retrieve&amp;db=pubmed&amp;dopt=Abstract&amp;list_uids=27415751</a>  6 Cancer Biol Ther  Jul 2016 JOURNAL ARTICLE  <a href="http://www.ncbi.nlm.nih.gov/entrez/query.fcgi?cmd=Retrieve&amp;db=pubmed&amp;dopt=Abstract&amp;list_uids=27307601">http://www.ncbi.nlm.nih.gov/entrez/query.fcgi?cmd=Retrieve&amp;db=pubmed&amp;dopt=Abstract&amp;list_uids=27307601</a>  6 Mol Cancer Ther 15 9 Sep 2016 Journal Article  <a href="http://www.ncbi.nlm.nih.gov/entrez/query.fcgi?cmd=Retrieve&amp;db=pubmed&amp;dopt=Abstract&amp;list_uids=27461244">http://www.ncbi.nlm.nih.gov/entrez/query.fcgi?cmd=Retrieve&amp;db=pubmed&amp;dopt=Abstract&amp;list_uids=27461244</a>  6 Oncol Rep 36 3 Sep 2016 Journal Article  <a href="http://www.ncbi.nlm.nih.gov/entrez/query.fcgi?cmd=Retrieve&amp;db=pubmed&amp;dopt=Abstract&amp;list_uids=27353107">http://www.ncbi.nlm.nih.gov/entrez/query.fcgi?cmd=Retrieve&amp;db=pubmed&amp;dopt=Abstract&amp;list_uids=27353107</a>  6 Zhonghua Wei Chang Wai Ke Za Zhi 19 6 Jun 2016 English Abstract,Journal Article |
| stat3 | mmp1   | <a href="http://www.ncbi.nlm.nih.gov/entrez/query.fcgi?cmd=Retrieve&amp;db=pubmed&amp;dopt=Abstract&amp;list_uids=27566200">http://www.ncbi.nlm.nih.gov/entrez/query.fcgi?cmd=Retrieve&amp;db=pubmed&amp;dopt=Abstract&amp;list_uids=27566200</a>  6 J Ethnopharmacol  Aug 2016 JOURNAL ARTICLE                                                                                                                                                                                                                                                                                                                                                                                                                                                                                                                                                                                                                                                                                                                                                                                                                                                                                                                                                                                                                                                                                                                                                                                                                                                                                                                                                                                                                                                                                                                               |
| stat3 | itk    | <a href="http://www.ncbi.nlm.nih.gov/entrez/query.fcgi?cmd=Retrieve&amp;db=pubmed&amp;dopt=Abstract&amp;list_uids=27307601">http://www.ncbi.nlm.nih.gov/entrez/query.fcgi?cmd=Retrieve&amp;db=pubmed&amp;dopt=Abstract&amp;list_uids=27307601</a>  6 Mol Cancer Ther 15 9 Sep 2016 Journal Article  <a href="http://www.ncbi.nlm.nih.gov/entrez/query.fcgi?cmd=Retrieve&amp;db=pubmed&amp;dopt=Abstract&amp;list_uids=27576314">http://www.ncbi.nlm.nih.gov/entrez/query.fcgi?cmd=Retrieve&amp;db=pubmed&amp;dopt=Abstract&amp;list_uids=27576314</a>  6 J Exp Clin Cancer Res 35 1  2016 Journal Article                                                                                                                                                                                                                                                                                                                                                                                                                                                                                                                                                                                                                                                                                                                                                                                                                                                                                                                                                                                                                                                                                                                                                                                                                     |
| stat3 | akt1   | <a href="http://www.ncbi.nlm.nih.gov/entrez/query.fcgi?cmd=Retrieve&amp;db=pubmed&amp;dopt=Abstract&amp;list_uids=27599909">http://www.ncbi.nlm.nih.gov/entrez/query.fcgi?cmd=Retrieve&amp;db=pubmed&amp;dopt=Abstract&amp;list_uids=27599909</a>  6 Mol Med Rep  Sep 2016 JOURNAL ARTICLE                                                                                                                                                                                                                                                                                                                                                                                                                                                                                                                                                                                                                                                                                                                                                                                                                                                                                                                                                                                                                                                                                                                                                                                                                                                                                                                                                                                                                                                                                                                                    |

|       |         |                                                                                                                                                                                                                                                                                                                                                                                                                                                                                                                                                                                                                                                                                                                                                                                                                                                                                                                                                                                                                                                                                                                                                                                                                |
|-------|---------|----------------------------------------------------------------------------------------------------------------------------------------------------------------------------------------------------------------------------------------------------------------------------------------------------------------------------------------------------------------------------------------------------------------------------------------------------------------------------------------------------------------------------------------------------------------------------------------------------------------------------------------------------------------------------------------------------------------------------------------------------------------------------------------------------------------------------------------------------------------------------------------------------------------------------------------------------------------------------------------------------------------------------------------------------------------------------------------------------------------------------------------------------------------------------------------------------------------|
| stat3 | hcc     | <a href="http://www.ncbi.nlm.nih.gov/entrez/query.fcgi?cmd=Retrieve&amp;db=pubmed&amp;dopt=Abstract&amp;list_uids=27608898">http://www.ncbi.nlm.nih.gov/entrez/query.fcgi?cmd=Retrieve&amp;db=pubmed&amp;dopt=Abstract&amp;list_uids=27608898</a>  6 Eur Rev Med Pharmacol Sci 20 16 Aug 2016 Journal Article  <a href="http://www.ncbi.nlm.nih.gov/entrez/query.fcgi?cmd=Retrieve&amp;db=pubmed&amp;dopt=Abstract&amp;list_uids=27461244">http://www.ncbi.nlm.nih.gov/entrez/query.fcgi?cmd=Retrieve&amp;db=pubmed&amp;dopt=Abstract&amp;list_uids=27461244</a>  6 Oncol Rep 36 3 Sep 2016 Journal Article  <a href="http://www.ncbi.nlm.nih.gov/entrez/query.fcgi?cmd=Retrieve&amp;db=pubmed&amp;dopt=Abstract&amp;list_uids=27292026">http://www.ncbi.nlm.nih.gov/entrez/query.fcgi?cmd=Retrieve&amp;db=pubmed&amp;dopt=Abstract&amp;list_uids=27292026</a>  6 Neoplasia 18 6 Jun 2016 Journal Article                                                                                                                                                                                                                                                                                                      |
| ephb2 | mmp13   | <a href="http://www.ncbi.nlm.nih.gov/entrez/query.fcgi?cmd=Retrieve&amp;db=pubmed&amp;dopt=Abstract&amp;list_uids=27356745">http://www.ncbi.nlm.nih.gov/entrez/query.fcgi?cmd=Retrieve&amp;db=pubmed&amp;dopt=Abstract&amp;list_uids=27356745</a>  6 Oncotarget  Jun 2016 JOURNAL ARTICLE                                                                                                                                                                                                                                                                                                                                                                                                                                                                                                                                                                                                                                                                                                                                                                                                                                                                                                                      |
| ephb2 | hdac9   | <a href="http://www.ncbi.nlm.nih.gov/entrez/query.fcgi?cmd=Retrieve&amp;db=pubmed&amp;dopt=Abstract&amp;list_uids=27418645">http://www.ncbi.nlm.nih.gov/entrez/query.fcgi?cmd=Retrieve&amp;db=pubmed&amp;dopt=Abstract&amp;list_uids=27418645</a>  6 Mol Cancer Res  Jul 2016 JOURNAL ARTICLE                                                                                                                                                                                                                                                                                                                                                                                                                                                                                                                                                                                                                                                                                                                                                                                                                                                                                                                  |
| ephb2 | egr1    | <a href="http://www.ncbi.nlm.nih.gov/entrez/query.fcgi?cmd=Retrieve&amp;db=pubmed&amp;dopt=Abstract&amp;list_uids=27530187">http://www.ncbi.nlm.nih.gov/entrez/query.fcgi?cmd=Retrieve&amp;db=pubmed&amp;dopt=Abstract&amp;list_uids=27530187</a>  6 Hepatology  Aug 2016 JOURNAL ARTICLE                                                                                                                                                                                                                                                                                                                                                                                                                                                                                                                                                                                                                                                                                                                                                                                                                                                                                                                      |
| ephb2 | rela    | <a href="http://www.ncbi.nlm.nih.gov/entrez/query.fcgi?cmd=Retrieve&amp;db=pubmed&amp;dopt=Abstract&amp;list_uids=27533779">http://www.ncbi.nlm.nih.gov/entrez/query.fcgi?cmd=Retrieve&amp;db=pubmed&amp;dopt=Abstract&amp;list_uids=27533779</a>  6 Mol Carcinog  Aug 2016 JOURNAL ARTICLE                                                                                                                                                                                                                                                                                                                                                                                                                                                                                                                                                                                                                                                                                                                                                                                                                                                                                                                    |
| ephb2 | jag1    | <a href="http://www.ncbi.nlm.nih.gov/entrez/query.fcgi?cmd=Retrieve&amp;db=pubmed&amp;dopt=Abstract&amp;list_uids=27542217">http://www.ncbi.nlm.nih.gov/entrez/query.fcgi?cmd=Retrieve&amp;db=pubmed&amp;dopt=Abstract&amp;list_uids=27542217</a>  6 Oncotarget  Aug 2016 JOURNAL ARTICLE                                                                                                                                                                                                                                                                                                                                                                                                                                                                                                                                                                                                                                                                                                                                                                                                                                                                                                                      |
| ephb2 | sgcb    | <a href="http://www.ncbi.nlm.nih.gov/entrez/query.fcgi?cmd=Retrieve&amp;db=pubmed&amp;dopt=Abstract&amp;list_uids=27542217">http://www.ncbi.nlm.nih.gov/entrez/query.fcgi?cmd=Retrieve&amp;db=pubmed&amp;dopt=Abstract&amp;list_uids=27542217</a>  6 Oncotarget  Aug 2016 JOURNAL ARTICLE                                                                                                                                                                                                                                                                                                                                                                                                                                                                                                                                                                                                                                                                                                                                                                                                                                                                                                                      |
| ephb2 | adamts6 | <a href="http://www.ncbi.nlm.nih.gov/entrez/query.fcgi?cmd=Retrieve&amp;db=pubmed&amp;dopt=Abstract&amp;list_uids=27542224">http://www.ncbi.nlm.nih.gov/entrez/query.fcgi?cmd=Retrieve&amp;db=pubmed&amp;dopt=Abstract&amp;list_uids=27542224</a>  6 Oncotarget  Aug 2016 JOURNAL ARTICLE                                                                                                                                                                                                                                                                                                                                                                                                                                                                                                                                                                                                                                                                                                                                                                                                                                                                                                                      |
| ephb2 | itk     | <a href="http://www.ncbi.nlm.nih.gov/entrez/query.fcgi?cmd=Retrieve&amp;db=pubmed&amp;dopt=Abstract&amp;list_uids=27481258">http://www.ncbi.nlm.nih.gov/entrez/query.fcgi?cmd=Retrieve&amp;db=pubmed&amp;dopt=Abstract&amp;list_uids=27481258</a>  6 Lasers Med Sci  Aug 2016 JOURNAL ARTICLE  <a href="http://www.ncbi.nlm.nih.gov/entrez/query.fcgi?cmd=Retrieve&amp;db=pubmed&amp;dopt=Abstract&amp;list_uids=27562816">http://www.ncbi.nlm.nih.gov/entrez/query.fcgi?cmd=Retrieve&amp;db=pubmed&amp;dopt=Abstract&amp;list_uids=27562816</a>  6 Cell Physiol Biochem 39 3  2016 Journal Article  <a href="http://www.ncbi.nlm.nih.gov/entrez/query.fcgi?cmd=Retrieve&amp;db=pubmed&amp;dopt=Abstract&amp;list_uids=27409670">http://www.ncbi.nlm.nih.gov/entrez/query.fcgi?cmd=Retrieve&amp;db=pubmed&amp;dopt=Abstract&amp;list_uids=27409670</a>  6 Oncotarget  Jul 2016 JOURNAL ARTICLE  <a href="http://www.ncbi.nlm.nih.gov/entrez/query.fcgi?cmd=Retrieve&amp;db=pubmed&amp;dopt=Abstract&amp;list_uids=27507215">http://www.ncbi.nlm.nih.gov/entrez/query.fcgi?cmd=Retrieve&amp;db=pubmed&amp;dopt=Abstract&amp;list_uids=27507215</a>  6 Biochem Biophys Res Commun 478 2 Sep 2016 Journal Article |
| ephb2 | foxc2   | <a href="http://www.ncbi.nlm.nih.gov/entrez/query.fcgi?cmd=Retrieve&amp;db=pubmed&amp;dopt=Abstract&amp;list_uids=27562816">http://www.ncbi.nlm.nih.gov/entrez/query.fcgi?cmd=Retrieve&amp;db=pubmed&amp;dopt=Abstract&amp;list_uids=27562816</a>  6 Cell Physiol Biochem 39 3  2016 Journal Article                                                                                                                                                                                                                                                                                                                                                                                                                                                                                                                                                                                                                                                                                                                                                                                                                                                                                                           |
| ephb2 | akt1    | <a href="http://www.ncbi.nlm.nih.gov/entrez/query.fcgi?cmd=Retrieve&amp;db=pubmed&amp;dopt=Abstract&amp;list_uids=27573026">http://www.ncbi.nlm.nih.gov/entrez/query.fcgi?cmd=Retrieve&amp;db=pubmed&amp;dopt=Abstract&amp;list_uids=27573026</a>  6 Int J Oncol 49 3 Sep 2016 Journal Article  <a href="http://www.ncbi.nlm.nih.gov/entrez/query.fcgi?cmd=Retrieve&amp;db=pubmed&amp;dopt=Abstract&amp;list_uids=27303300">http://www.ncbi.nlm.nih.gov/entrez/query.fcgi?cmd=Retrieve&amp;db=pubmed&amp;dopt=Abstract&amp;list_uids=27303300</a>  6 Front Pharmacol 7   2016 Journal Article  <a href="http://www.ncbi.nlm.nih.gov/entrez/query.fcgi?cmd=Retrieve&amp;db=pubmed&amp;dopt=Abstract&amp;list_uids=27572273">http://www.ncbi.nlm.nih.gov/entrez/query.fcgi?cmd=Retrieve&amp;db=pubmed&amp;dopt=Abstract&amp;list_uids=27572273</a>  6 Int J Oncol 49 3 Sep 2016 Journal Article                                                                                                                                                                                                                                                                                                                  |

|       |        |                                                                                                                                                                                                                                                                                                                                                                                                                                                                                                                                                                                                                                                                                                                                                                                                                                                                                                                                                                                                                                                                                                                                                                                                                                                                                                                                                                                                                                                                                                                                                                                                                                                                                                                                                                                                                                                 |
|-------|--------|-------------------------------------------------------------------------------------------------------------------------------------------------------------------------------------------------------------------------------------------------------------------------------------------------------------------------------------------------------------------------------------------------------------------------------------------------------------------------------------------------------------------------------------------------------------------------------------------------------------------------------------------------------------------------------------------------------------------------------------------------------------------------------------------------------------------------------------------------------------------------------------------------------------------------------------------------------------------------------------------------------------------------------------------------------------------------------------------------------------------------------------------------------------------------------------------------------------------------------------------------------------------------------------------------------------------------------------------------------------------------------------------------------------------------------------------------------------------------------------------------------------------------------------------------------------------------------------------------------------------------------------------------------------------------------------------------------------------------------------------------------------------------------------------------------------------------------------------------|
|       |        | <p>Article <a href="http://www.ncbi.nlm.nih.gov/entrez/query.fcgi?cmd=Retrieve&amp;db=pubmed&amp;dopt=Abstract&amp;list_uids=27562816">http://www.ncbi.nlm.nih.gov/entrez/query.fcgi?cmd=Retrieve&amp;db=pubmed&amp;dopt=Abstract&amp;list_uids=27562816</a> 6 Cell Physiol Biochem 39 3  2016 Journal</p> <p>Article <a href="http://www.ncbi.nlm.nih.gov/entrez/query.fcgi?cmd=Retrieve&amp;db=pubmed&amp;dopt=Abstract&amp;list_uids=27507215">http://www.ncbi.nlm.nih.gov/entrez/query.fcgi?cmd=Retrieve&amp;db=pubmed&amp;dopt=Abstract&amp;list_uids=27507215</a> 6 Biochem Biophys Res Commun 478 2 Sep 2016 Journal</p> <p>Article <a href="http://www.ncbi.nlm.nih.gov/entrez/query.fcgi?cmd=Retrieve&amp;db=pubmed&amp;dopt=Abstract&amp;list_uids=27557506">http://www.ncbi.nlm.nih.gov/entrez/query.fcgi?cmd=Retrieve&amp;db=pubmed&amp;dopt=Abstract&amp;list_uids=27557506</a> 6 Oncotarget   Aug 2016 JOURNAL</p> <p>ARTICLE <a href="http://www.ncbi.nlm.nih.gov/entrez/query.fcgi?cmd=Retrieve&amp;db=pubmed&amp;dopt=Abstract&amp;list_uids=27530187">http://www.ncbi.nlm.nih.gov/entrez/query.fcgi?cmd=Retrieve&amp;db=pubmed&amp;dopt=Abstract&amp;list_uids=27530187</a> 6 Hepatology   Aug 2016 JOURNAL</p> <p>ARTICLE <a href="http://www.ncbi.nlm.nih.gov/entrez/query.fcgi?cmd=Retrieve&amp;db=pubmed&amp;dopt=Abstract&amp;list_uids=27374177">http://www.ncbi.nlm.nih.gov/entrez/query.fcgi?cmd=Retrieve&amp;db=pubmed&amp;dopt=Abstract&amp;list_uids=27374177</a> 6 Oncotarget   Jun 2016 JOURNAL</p> <p>ARTICLE <a href="http://www.ncbi.nlm.nih.gov/entrez/query.fcgi?cmd=Retrieve&amp;db=pubmed&amp;dopt=Abstract&amp;list_uids=27573547">http://www.ncbi.nlm.nih.gov/entrez/query.fcgi?cmd=Retrieve&amp;db=pubmed&amp;dopt=Abstract&amp;list_uids=27573547</a> 6 Int J Oncol 49 3 Sep 2016 Journal Article</p> |
| ephb2 | pik3ca | <p><a href="http://www.ncbi.nlm.nih.gov/entrez/query.fcgi?cmd=Retrieve&amp;db=pubmed&amp;dopt=Abstract&amp;list_uids=27303300">http://www.ncbi.nlm.nih.gov/entrez/query.fcgi?cmd=Retrieve&amp;db=pubmed&amp;dopt=Abstract&amp;list_uids=27303300</a> 6 Front Pharmacol 7   2016 Journal</p> <p>Article <a href="http://www.ncbi.nlm.nih.gov/entrez/query.fcgi?cmd=Retrieve&amp;db=pubmed&amp;dopt=Abstract&amp;list_uids=27572273">http://www.ncbi.nlm.nih.gov/entrez/query.fcgi?cmd=Retrieve&amp;db=pubmed&amp;dopt=Abstract&amp;list_uids=27572273</a> 6 Int J Oncol 49 3 Sep 2016 Journal</p> <p>Article <a href="http://www.ncbi.nlm.nih.gov/entrez/query.fcgi?cmd=Retrieve&amp;db=pubmed&amp;dopt=Abstract&amp;list_uids=27573547">http://www.ncbi.nlm.nih.gov/entrez/query.fcgi?cmd=Retrieve&amp;db=pubmed&amp;dopt=Abstract&amp;list_uids=27573547</a> 6 Int J Oncol 49 3 Sep 2016 Journal Article</p>                                                                                                                                                                                                                                                                                                                                                                                                                                                                                                                                                                                                                                                                                                                                                                                                                                                                                                                                   |
| ephb2 | mapk14 | <p><a href="http://www.ncbi.nlm.nih.gov/entrez/query.fcgi?cmd=Retrieve&amp;db=pubmed&amp;dopt=Abstract&amp;list_uids=27278736">http://www.ncbi.nlm.nih.gov/entrez/query.fcgi?cmd=Retrieve&amp;db=pubmed&amp;dopt=Abstract&amp;list_uids=27278736</a> 6 Int J Oncol 49 2 Aug 2016 Journal</p> <p>Article <a href="http://www.ncbi.nlm.nih.gov/entrez/query.fcgi?cmd=Retrieve&amp;db=pubmed&amp;dopt=Abstract&amp;list_uids=27507215">http://www.ncbi.nlm.nih.gov/entrez/query.fcgi?cmd=Retrieve&amp;db=pubmed&amp;dopt=Abstract&amp;list_uids=27507215</a> 6 Biochem Biophys Res Commun 478 2 Sep 2016 Journal</p> <p>Article <a href="http://www.ncbi.nlm.nih.gov/entrez/query.fcgi?cmd=Retrieve&amp;db=pubmed&amp;dopt=Abstract&amp;list_uids=27588409">http://www.ncbi.nlm.nih.gov/entrez/query.fcgi?cmd=Retrieve&amp;db=pubmed&amp;dopt=Abstract&amp;list_uids=27588409</a> 6 Oncotarget   Aug 2016 JOURNAL</p> <p>ARTICLE <a href="http://www.ncbi.nlm.nih.gov/entrez/query.fcgi?cmd=Retrieve&amp;db=pubmed&amp;dopt=Abstract&amp;list_uids=27476935">http://www.ncbi.nlm.nih.gov/entrez/query.fcgi?cmd=Retrieve&amp;db=pubmed&amp;dopt=Abstract&amp;list_uids=27476935</a> 6 Biol Pharm Bull 39 8  2016 Journal</p> <p>Article <a href="http://www.ncbi.nlm.nih.gov/entrez/query.fcgi?cmd=Retrieve&amp;db=pubmed&amp;dopt=Abstract&amp;list_uids=27274278">http://www.ncbi.nlm.nih.gov/entrez/query.fcgi?cmd=Retrieve&amp;db=pubmed&amp;dopt=Abstract&amp;list_uids=27274278</a> 6 Oncotargets Ther 9   2016 Journal Article</p>                                                                                                                                                                                                                                                                                                           |
| ephb2 | frap1  | <p><a href="http://www.ncbi.nlm.nih.gov/entrez/query.fcgi?cmd=Retrieve&amp;db=pubmed&amp;dopt=Abstract&amp;list_uids=27589685">http://www.ncbi.nlm.nih.gov/entrez/query.fcgi?cmd=Retrieve&amp;db=pubmed&amp;dopt=Abstract&amp;list_uids=27589685</a> 6 Oncotarget   Aug 2016 JOURNAL</p> <p>ARTICLE <a href="http://www.ncbi.nlm.nih.gov/entrez/query.fcgi?cmd=Retrieve&amp;db=pubmed&amp;dopt=Abstract&amp;list_uids=27573547">http://www.ncbi.nlm.nih.gov/entrez/query.fcgi?cmd=Retrieve&amp;db=pubmed&amp;dopt=Abstract&amp;list_uids=27573547</a> 6 Int J Oncol 49 3 Sep 2016 Journal Article</p>                                                                                                                                                                                                                                                                                                                                                                                                                                                                                                                                                                                                                                                                                                                                                                                                                                                                                                                                                                                                                                                                                                                                                                                                                                           |
| ephb2 | myc    | <p><a href="http://www.ncbi.nlm.nih.gov/entrez/query.fcgi?cmd=Retrieve&amp;db=pubmed&amp;dopt=Abstract&amp;list_uids=27601158">http://www.ncbi.nlm.nih.gov/entrez/query.fcgi?cmd=Retrieve&amp;db=pubmed&amp;dopt=Abstract&amp;list_uids=27601158</a> 6 Int J Oncol   Aug 2016 JOURNAL ARTICLE</p>                                                                                                                                                                                                                                                                                                                                                                                                                                                                                                                                                                                                                                                                                                                                                                                                                                                                                                                                                                                                                                                                                                                                                                                                                                                                                                                                                                                                                                                                                                                                               |
| ephb2 | mmp9   | <p><a href="http://www.ncbi.nlm.nih.gov/entrez/query.fcgi?cmd=Retrieve&amp;db=pubmed&amp;dopt=Abstract&amp;list_uids=27573026">http://www.ncbi.nlm.nih.gov/entrez/query.fcgi?cmd=Retrieve&amp;db=pubmed&amp;dopt=Abstract&amp;list_uids=27573026</a> 6 Int J Oncol 49 3 Sep 2016 Journal</p>                                                                                                                                                                                                                                                                                                                                                                                                                                                                                                                                                                                                                                                                                                                                                                                                                                                                                                                                                                                                                                                                                                                                                                                                                                                                                                                                                                                                                                                                                                                                                    |

|        |           |                                                                                                                                                                                                                                                                                                                                                                                                                                                                                                                                                                                                                          |
|--------|-----------|--------------------------------------------------------------------------------------------------------------------------------------------------------------------------------------------------------------------------------------------------------------------------------------------------------------------------------------------------------------------------------------------------------------------------------------------------------------------------------------------------------------------------------------------------------------------------------------------------------------------------|
|        |           | Article  <a href="http://www.ncbi.nlm.nih.gov/entrez/query.fcgi?cmd=Retrieve&amp;db=pubmed&amp;dopt=Abstract&amp;list_uids=27481258">http://www.ncbi.nlm.nih.gov/entrez/query.fcgi?cmd=Retrieve&amp;db=pubmed&amp;dopt=Abstract&amp;list_uids=27481258</a>  6 Lasers Med Sci  Aug 2016 JOURNAL ARTICLE  <a href="http://www.ncbi.nlm.nih.gov/entrez/query.fcgi?cmd=Retrieve&amp;db=pubmed&amp;dopt=Abstract&amp;list_uids=27601158">http://www.ncbi.nlm.nih.gov/entrez/query.fcgi?cmd=Retrieve&amp;db=pubmed&amp;dopt=Abstract&amp;list_uids=27601158</a>  6 Int J Oncol  Aug 2016 JOURNAL ARTICLE                       |
| gpr160 | ephb2     | <a href="http://www.ncbi.nlm.nih.gov/entrez/query.fcgi?cmd=Retrieve&amp;db=pubmed&amp;dopt=Abstract&amp;list_uids=27259691">http://www.ncbi.nlm.nih.gov/entrez/query.fcgi?cmd=Retrieve&amp;db=pubmed&amp;dopt=Abstract&amp;list_uids=27259691</a>  6 Cell Signal 28 9 Sep 2016 Journal Article                                                                                                                                                                                                                                                                                                                           |
| gpr160 | gli2      | <a href="http://www.ncbi.nlm.nih.gov/entrez/query.fcgi?cmd=Retrieve&amp;db=pubmed&amp;dopt=Abstract&amp;list_uids=27259691">http://www.ncbi.nlm.nih.gov/entrez/query.fcgi?cmd=Retrieve&amp;db=pubmed&amp;dopt=Abstract&amp;list_uids=27259691</a>  6 Cell Signal 28 9 Sep 2016 Journal Article                                                                                                                                                                                                                                                                                                                           |
| mapk3  | ephb2     | <a href="http://www.ncbi.nlm.nih.gov/entrez/query.fcgi?cmd=Retrieve&amp;db=pubmed&amp;dopt=Abstract&amp;list_uids=27259691">http://www.ncbi.nlm.nih.gov/entrez/query.fcgi?cmd=Retrieve&amp;db=pubmed&amp;dopt=Abstract&amp;list_uids=27259691</a>  6 Cell Signal 28 9 Sep 2016 Journal Article                                                                                                                                                                                                                                                                                                                           |
| mapk3  | gpr160    | <a href="http://www.ncbi.nlm.nih.gov/entrez/query.fcgi?cmd=Retrieve&amp;db=pubmed&amp;dopt=Abstract&amp;list_uids=27259691">http://www.ncbi.nlm.nih.gov/entrez/query.fcgi?cmd=Retrieve&amp;db=pubmed&amp;dopt=Abstract&amp;list_uids=27259691</a>  6 Cell Signal 28 9 Sep 2016 Journal Article                                                                                                                                                                                                                                                                                                                           |
| mapk3  | mapk7     | <a href="http://www.ncbi.nlm.nih.gov/entrez/query.fcgi?cmd=Retrieve&amp;db=pubmed&amp;dopt=Abstract&amp;list_uids=27279438">http://www.ncbi.nlm.nih.gov/entrez/query.fcgi?cmd=Retrieve&amp;db=pubmed&amp;dopt=Abstract&amp;list_uids=27279438</a>  6 Oncol Rep 36 2 Aug 2016 Journal Article                                                                                                                                                                                                                                                                                                                             |
| mapk3  | kdr       | <a href="http://www.ncbi.nlm.nih.gov/entrez/query.fcgi?cmd=Retrieve&amp;db=pubmed&amp;dopt=Abstract&amp;list_uids=27297262">http://www.ncbi.nlm.nih.gov/entrez/query.fcgi?cmd=Retrieve&amp;db=pubmed&amp;dopt=Abstract&amp;list_uids=27297262</a>  6 Clin Exp Pharmacol Physiol 43 10 Oct 2016 Journal Article                                                                                                                                                                                                                                                                                                           |
| mapk3  | arf6      | <a href="http://www.ncbi.nlm.nih.gov/entrez/query.fcgi?cmd=Retrieve&amp;db=pubmed&amp;dopt=Abstract&amp;list_uids=27320871">http://www.ncbi.nlm.nih.gov/entrez/query.fcgi?cmd=Retrieve&amp;db=pubmed&amp;dopt=Abstract&amp;list_uids=27320871</a>  6 Nan Fang Yi Ke Da Xue Xue Bao 36 6 Jun 2016 English Abstract,Journal Article,Research Support, Non-U.S. Gov't                                                                                                                                                                                                                                                       |
| mapk3  | rac1      | <a href="http://www.ncbi.nlm.nih.gov/entrez/query.fcgi?cmd=Retrieve&amp;db=pubmed&amp;dopt=Abstract&amp;list_uids=27320871">http://www.ncbi.nlm.nih.gov/entrez/query.fcgi?cmd=Retrieve&amp;db=pubmed&amp;dopt=Abstract&amp;list_uids=27320871</a>  6 Nan Fang Yi Ke Da Xue Xue Bao 36 6 Jun 2016 English Abstract,Journal Article,Research Support, Non-U.S. Gov't                                                                                                                                                                                                                                                       |
| mapk3  | commd7    | <a href="http://www.ncbi.nlm.nih.gov/entrez/query.fcgi?cmd=Retrieve&amp;db=pubmed&amp;dopt=Abstract&amp;list_uids=27350032">http://www.ncbi.nlm.nih.gov/entrez/query.fcgi?cmd=Retrieve&amp;db=pubmed&amp;dopt=Abstract&amp;list_uids=27350032</a>  6 Mol Carcinog  Jun 2016 JOURNAL ARTICLE                                                                                                                                                                                                                                                                                                                              |
| mapk3  | rela      | <a href="http://www.ncbi.nlm.nih.gov/entrez/query.fcgi?cmd=Retrieve&amp;db=pubmed&amp;dopt=Abstract&amp;list_uids=27393618">http://www.ncbi.nlm.nih.gov/entrez/query.fcgi?cmd=Retrieve&amp;db=pubmed&amp;dopt=Abstract&amp;list_uids=27393618</a>  6 Breast Cancer Res Treat 158 3 Aug 2016 Journal Article                                                                                                                                                                                                                                                                                                              |
| mapk3  | nf-kappab | <a href="http://www.ncbi.nlm.nih.gov/entrez/query.fcgi?cmd=Retrieve&amp;db=pubmed&amp;dopt=Abstract&amp;list_uids=27393618">http://www.ncbi.nlm.nih.gov/entrez/query.fcgi?cmd=Retrieve&amp;db=pubmed&amp;dopt=Abstract&amp;list_uids=27393618</a>  6 Breast Cancer Res Treat 158 3 Aug 2016 Journal Article                                                                                                                                                                                                                                                                                                              |
| mapk3  | ptk2      | <a href="http://www.ncbi.nlm.nih.gov/entrez/query.fcgi?cmd=Retrieve&amp;db=pubmed&amp;dopt=Abstract&amp;list_uids=27297262">http://www.ncbi.nlm.nih.gov/entrez/query.fcgi?cmd=Retrieve&amp;db=pubmed&amp;dopt=Abstract&amp;list_uids=27297262</a>  6 Clin Exp Pharmacol Physiol 43 10 Oct 2016 Journal Article  <a href="http://www.ncbi.nlm.nih.gov/entrez/query.fcgi?cmd=Retrieve&amp;db=pubmed&amp;dopt=Abstract&amp;list_uids=27422337">http://www.ncbi.nlm.nih.gov/entrez/query.fcgi?cmd=Retrieve&amp;db=pubmed&amp;dopt=Abstract&amp;list_uids=27422337</a>  6 Bioorg Med Chem Lett 26 16 Aug 2016 Journal Article |
| mapk3  | src       | <a href="http://www.ncbi.nlm.nih.gov/entrez/query.fcgi?cmd=Retrieve&amp;db=pubmed&amp;dopt=Abstract&amp;list_uids=27297262">http://www.ncbi.nlm.nih.gov/entrez/query.fcgi?cmd=Retrieve&amp;db=pubmed&amp;dopt=Abstract&amp;list_uids=27297262</a>  6 Clin Exp Pharmacol Physiol 43 10 Oct 2016 Journal Article  <a href="http://www.ncbi.nlm.nih.gov/entrez/query.fcgi?cmd=Retrieve&amp;db=pubmed&amp;dopt=Abstract&amp;list_uids=27422337">http://www.ncbi.nlm.nih.gov/entrez/query.fcgi?cmd=Retrieve&amp;db=pubmed&amp;dopt=Abstract&amp;list_uids=27422337</a>  6 Bioorg Med Chem Lett 26 16 Aug 2016 Journal Article |
| mapk3  | egf       | <a href="http://www.ncbi.nlm.nih.gov/entrez/query.fcgi?cmd=Retrieve&amp;db=pubmed&amp;dopt=Abstract&amp;list_uids=27470348">http://www.ncbi.nlm.nih.gov/entrez/query.fcgi?cmd=Retrieve&amp;db=pubmed&amp;dopt=Abstract&amp;list_uids=27470348</a>  6 Biomed Pharmacother 82  Aug 2016 Journal Article                                                                                                                                                                                                                                                                                                                    |

|       |        |                                                                                                                                                                                                                                                                                                                                                                                                                                                                                                                                                                                                                                                                                                                                                                                                                                                                                                                                                                                                                                                                                                                                                                                                                                                                                                                                                                                                                                                                                                  |
|-------|--------|--------------------------------------------------------------------------------------------------------------------------------------------------------------------------------------------------------------------------------------------------------------------------------------------------------------------------------------------------------------------------------------------------------------------------------------------------------------------------------------------------------------------------------------------------------------------------------------------------------------------------------------------------------------------------------------------------------------------------------------------------------------------------------------------------------------------------------------------------------------------------------------------------------------------------------------------------------------------------------------------------------------------------------------------------------------------------------------------------------------------------------------------------------------------------------------------------------------------------------------------------------------------------------------------------------------------------------------------------------------------------------------------------------------------------------------------------------------------------------------------------|
| mapk3 | pik3ca | <a href="http://www.ncbi.nlm.nih.gov/entrez/query.fcgi?cmd=Retrieve&amp;db=pubmed&amp;dopt=Abstract&amp;list_uids=27470348">http://www.ncbi.nlm.nih.gov/entrez/query.fcgi?cmd=Retrieve&amp;db=pubmed&amp;dopt=Abstract&amp;list_uids=27470348</a>  6 Biomed Pharmacother 82  Aug 2016 Journal Article                                                                                                                                                                                                                                                                                                                                                                                                                                                                                                                                                                                                                                                                                                                                                                                                                                                                                                                                                                                                                                                                                                                                                                                            |
| mapk3 | plau   | <a href="http://www.ncbi.nlm.nih.gov/entrez/query.fcgi?cmd=Retrieve&amp;db=pubmed&amp;dopt=Abstract&amp;list_uids=27527140">http://www.ncbi.nlm.nih.gov/entrez/query.fcgi?cmd=Retrieve&amp;db=pubmed&amp;dopt=Abstract&amp;list_uids=27527140</a>  6 Molecules 21 8  2016 Journal Article                                                                                                                                                                                                                                                                                                                                                                                                                                                                                                                                                                                                                                                                                                                                                                                                                                                                                                                                                                                                                                                                                                                                                                                                        |
| mapk3 | mmp2   | <a href="http://www.ncbi.nlm.nih.gov/entrez/query.fcgi?cmd=Retrieve&amp;db=pubmed&amp;dopt=Abstract&amp;list_uids=27322511">http://www.ncbi.nlm.nih.gov/entrez/query.fcgi?cmd=Retrieve&amp;db=pubmed&amp;dopt=Abstract&amp;list_uids=27322511</a>  6 Environ Toxicol   Jun 2016 JOURNAL ARTICLE  <a href="http://www.ncbi.nlm.nih.gov/entrez/query.fcgi?cmd=Retrieve&amp;db=pubmed&amp;dopt=Abstract&amp;list_uids=27527140">http://www.ncbi.nlm.nih.gov/entrez/query.fcgi?cmd=Retrieve&amp;db=pubmed&amp;dopt=Abstract&amp;list_uids=27527140</a>  6 Molecules 21 8  2016 Journal Article  <a href="http://www.ncbi.nlm.nih.gov/entrez/query.fcgi?cmd=Retrieve&amp;db=pubmed&amp;dopt=Abstract&amp;list_uids=27470348">http://www.ncbi.nlm.nih.gov/entrez/query.fcgi?cmd=Retrieve&amp;db=pubmed&amp;dopt=Abstract&amp;list_uids=27470348</a>  6 Biomed Pharmacother 82  Aug 2016 Journal Article  <a href="http://www.ncbi.nlm.nih.gov/entrez/query.fcgi?cmd=Retrieve&amp;db=pubmed&amp;dopt=Abstract&amp;list_uids=27422337">http://www.ncbi.nlm.nih.gov/entrez/query.fcgi?cmd=Retrieve&amp;db=pubmed&amp;dopt=Abstract&amp;list_uids=27422337</a>  6 Bioorg Med Chem Lett 26 16 Aug 2016 Journal Article                                                                                                                                                                                                                                                                                      |
| mapk3 | mmp9   | <a href="http://www.ncbi.nlm.nih.gov/entrez/query.fcgi?cmd=Retrieve&amp;db=pubmed&amp;dopt=Abstract&amp;list_uids=27527140">http://www.ncbi.nlm.nih.gov/entrez/query.fcgi?cmd=Retrieve&amp;db=pubmed&amp;dopt=Abstract&amp;list_uids=27527140</a>  6 Molecules 21 8  2016 Journal Article  <a href="http://www.ncbi.nlm.nih.gov/entrez/query.fcgi?cmd=Retrieve&amp;db=pubmed&amp;dopt=Abstract&amp;list_uids=27470348">http://www.ncbi.nlm.nih.gov/entrez/query.fcgi?cmd=Retrieve&amp;db=pubmed&amp;dopt=Abstract&amp;list_uids=27470348</a>  6 Biomed Pharmacother 82  Aug 2016 Journal Article  <a href="http://www.ncbi.nlm.nih.gov/entrez/query.fcgi?cmd=Retrieve&amp;db=pubmed&amp;dopt=Abstract&amp;list_uids=27476935">http://www.ncbi.nlm.nih.gov/entrez/query.fcgi?cmd=Retrieve&amp;db=pubmed&amp;dopt=Abstract&amp;list_uids=27476935</a>  6 Biol Pharm Bull 39 8  2016 Journal Article  <a href="http://www.ncbi.nlm.nih.gov/entrez/query.fcgi?cmd=Retrieve&amp;db=pubmed&amp;dopt=Abstract&amp;list_uids=27422337">http://www.ncbi.nlm.nih.gov/entrez/query.fcgi?cmd=Retrieve&amp;db=pubmed&amp;dopt=Abstract&amp;list_uids=27422337</a>  6 Bioorg Med Chem Lett 26 16 Aug 2016 Journal Article                                                                                                                                                                                                                                                                                      |
| mapk3 | mapk8  | <a href="http://www.ncbi.nlm.nih.gov/entrez/query.fcgi?cmd=Retrieve&amp;db=pubmed&amp;dopt=Abstract&amp;list_uids=27366113">http://www.ncbi.nlm.nih.gov/entrez/query.fcgi?cmd=Retrieve&amp;db=pubmed&amp;dopt=Abstract&amp;list_uids=27366113</a>  6 Cancer Cell Int 16   2016 Journal Article  <a href="http://www.ncbi.nlm.nih.gov/entrez/query.fcgi?cmd=Retrieve&amp;db=pubmed&amp;dopt=Abstract&amp;list_uids=27527140">http://www.ncbi.nlm.nih.gov/entrez/query.fcgi?cmd=Retrieve&amp;db=pubmed&amp;dopt=Abstract&amp;list_uids=27527140</a>  6 Molecules 21 8  2016 Journal Article  <a href="http://www.ncbi.nlm.nih.gov/entrez/query.fcgi?cmd=Retrieve&amp;db=pubmed&amp;dopt=Abstract&amp;list_uids=27565324">http://www.ncbi.nlm.nih.gov/entrez/query.fcgi?cmd=Retrieve&amp;db=pubmed&amp;dopt=Abstract&amp;list_uids=27565324</a>  6 Neoplasma  6 Aug 2016 JOURNAL ARTICLE  <a href="http://www.ncbi.nlm.nih.gov/entrez/query.fcgi?cmd=Retrieve&amp;db=pubmed&amp;dopt=Abstract&amp;list_uids=27393618">http://www.ncbi.nlm.nih.gov/entrez/query.fcgi?cmd=Retrieve&amp;db=pubmed&amp;dopt=Abstract&amp;list_uids=27393618</a>  6 Breast Cancer Res Treat 158 3 Aug 2016 Journal Article  <a href="http://www.ncbi.nlm.nih.gov/entrez/query.fcgi?cmd=Retrieve&amp;db=pubmed&amp;dopt=Abstract&amp;list_uids=27279438">http://www.ncbi.nlm.nih.gov/entrez/query.fcgi?cmd=Retrieve&amp;db=pubmed&amp;dopt=Abstract&amp;list_uids=27279438</a>  6 Oncol Rep 36 2 Aug 2016 Journal Article |
| mapk3 | jun    | <a href="http://www.ncbi.nlm.nih.gov/entrez/query.fcgi?cmd=Retrieve&amp;db=pubmed&amp;dopt=Abstract&amp;list_uids=27565324">http://www.ncbi.nlm.nih.gov/entrez/query.fcgi?cmd=Retrieve&amp;db=pubmed&amp;dopt=Abstract&amp;list_uids=27565324</a>  6 Neoplasma  6 Aug 2016 JOURNAL ARTICLE                                                                                                                                                                                                                                                                                                                                                                                                                                                                                                                                                                                                                                                                                                                                                                                                                                                                                                                                                                                                                                                                                                                                                                                                       |
| mapk3 | frap1  | <a href="http://www.ncbi.nlm.nih.gov/entrez/query.fcgi?cmd=Retrieve&amp;db=pubmed&amp;dopt=Abstract&amp;list_uids=27589685">http://www.ncbi.nlm.nih.gov/entrez/query.fcgi?cmd=Retrieve&amp;db=pubmed&amp;dopt=Abstract&amp;list_uids=27589685</a>  6 Oncotarget   Aug 2016 JOURNAL ARTICLE  <a href="http://www.ncbi.nlm.nih.gov/entrez/query.fcgi?cmd=Retrieve&amp;db=pubmed&amp;dopt=Abstract&amp;list_uids=27551764">http://www.ncbi.nlm.nih.gov/entrez/query.fcgi?cmd=Retrieve&amp;db=pubmed&amp;dopt=Abstract&amp;list_uids=27551764</a>  6 Biomed Pharmacother 83  Aug 2016 JOURNAL ARTICLE                                                                                                                                                                                                                                                                                                                                                                                                                                                                                                                                                                                                                                                                                                                                                                                                                                                                                                |

|        |        |                                                                                                                                                                                                                                                                                                                                                                                                                                                                                                                                                                                                           |
|--------|--------|-----------------------------------------------------------------------------------------------------------------------------------------------------------------------------------------------------------------------------------------------------------------------------------------------------------------------------------------------------------------------------------------------------------------------------------------------------------------------------------------------------------------------------------------------------------------------------------------------------------|
| adam10 | hcc    | <a href="http://www.ncbi.nlm.nih.gov/entrez/query.fcgi?cmd=Retrieve&amp;db=pubmed&amp;dopt=Abstract&amp;list_uids=27259866">http://www.ncbi.nlm.nih.gov/entrez/query.fcgi?cmd=Retrieve&amp;db=pubmed&amp;dopt=Abstract&amp;list_uids=27259866</a>  6 J Exp Clin Cancer Res 35 1 2016 Journal Article                                                                                                                                                                                                                                                                                                      |
| mmp2   | ervk2  | <a href="http://www.ncbi.nlm.nih.gov/entrez/query.fcgi?cmd=Retrieve&amp;db=pubmed&amp;dopt=Abstract&amp;list_uids=27266355">http://www.ncbi.nlm.nih.gov/entrez/query.fcgi?cmd=Retrieve&amp;db=pubmed&amp;dopt=Abstract&amp;list_uids=27266355</a>  6 Zhonghua Yi Xue Za Zhi 96 18 May 2016 English Abstract,Journal Article,Research Support, Non-U.S. Gov't                                                                                                                                                                                                                                              |
| mmp2   | rela   | <a href="http://www.ncbi.nlm.nih.gov/entrez/query.fcgi?cmd=Retrieve&amp;db=pubmed&amp;dopt=Abstract&amp;list_uids=27279714">http://www.ncbi.nlm.nih.gov/entrez/query.fcgi?cmd=Retrieve&amp;db=pubmed&amp;dopt=Abstract&amp;list_uids=27279714</a>  6 Pharmacogn Mag 12 Suppl 2 May 2016 Journal Article                                                                                                                                                                                                                                                                                                   |
| mmp2   | tlr4   | <a href="http://www.ncbi.nlm.nih.gov/entrez/query.fcgi?cmd=Retrieve&amp;db=pubmed&amp;dopt=Abstract&amp;list_uids=27279714">http://www.ncbi.nlm.nih.gov/entrez/query.fcgi?cmd=Retrieve&amp;db=pubmed&amp;dopt=Abstract&amp;list_uids=27279714</a>  6 Pharmacogn Mag 12 Suppl 2 May 2016 Journal Article                                                                                                                                                                                                                                                                                                   |
| mmp2   | fbxl20 | <a href="http://www.ncbi.nlm.nih.gov/entrez/query.fcgi?cmd=Retrieve&amp;db=pubmed&amp;dopt=Abstract&amp;list_uids=27322511">http://www.ncbi.nlm.nih.gov/entrez/query.fcgi?cmd=Retrieve&amp;db=pubmed&amp;dopt=Abstract&amp;list_uids=27322511</a>  6 Environ Toxicol   Jun 2016 JOURNAL ARTICLE                                                                                                                                                                                                                                                                                                           |
| mmp2   | vegfa  | <a href="http://www.ncbi.nlm.nih.gov/entrez/query.fcgi?cmd=Retrieve&amp;db=pubmed&amp;dopt=Abstract&amp;list_uids=27363017">http://www.ncbi.nlm.nih.gov/entrez/query.fcgi?cmd=Retrieve&amp;db=pubmed&amp;dopt=Abstract&amp;list_uids=27363017</a>  6 Oncotarget   May 2016 JOURNAL ARTICLE                                                                                                                                                                                                                                                                                                                |
| mmp2   | ptk2   | <a href="http://www.ncbi.nlm.nih.gov/entrez/query.fcgi?cmd=Retrieve&amp;db=pubmed&amp;dopt=Abstract&amp;list_uids=27322511">http://www.ncbi.nlm.nih.gov/entrez/query.fcgi?cmd=Retrieve&amp;db=pubmed&amp;dopt=Abstract&amp;list_uids=27322511</a>  6 Environ Toxicol   Jun 2016 JOURNAL ARTICLE  <a href="http://www.ncbi.nlm.nih.gov/entrez/query.fcgi?cmd=Retrieve&amp;db=pubmed&amp;dopt=Abstract&amp;list_uids=27422337">http://www.ncbi.nlm.nih.gov/entrez/query.fcgi?cmd=Retrieve&amp;db=pubmed&amp;dopt=Abstract&amp;list_uids=27422337</a>  6 Bioorg Med Chem Lett 26 16 Aug 2016 Journal Article |
| mmp2   | src    | <a href="http://www.ncbi.nlm.nih.gov/entrez/query.fcgi?cmd=Retrieve&amp;db=pubmed&amp;dopt=Abstract&amp;list_uids=27422337">http://www.ncbi.nlm.nih.gov/entrez/query.fcgi?cmd=Retrieve&amp;db=pubmed&amp;dopt=Abstract&amp;list_uids=27422337</a>  6 Bioorg Med Chem Lett 26 16 Aug 2016 Journal Article                                                                                                                                                                                                                                                                                                  |
| mmp2   | mapk14 | <a href="http://www.ncbi.nlm.nih.gov/entrez/query.fcgi?cmd=Retrieve&amp;db=pubmed&amp;dopt=Abstract&amp;list_uids=27461575">http://www.ncbi.nlm.nih.gov/entrez/query.fcgi?cmd=Retrieve&amp;db=pubmed&amp;dopt=Abstract&amp;list_uids=27461575</a>  6 Oncol Rep 36 3 Sep 2016 Journal Article  <a href="http://www.ncbi.nlm.nih.gov/entrez/query.fcgi?cmd=Retrieve&amp;db=pubmed&amp;dopt=Abstract&amp;list_uids=27348267">http://www.ncbi.nlm.nih.gov/entrez/query.fcgi?cmd=Retrieve&amp;db=pubmed&amp;dopt=Abstract&amp;list_uids=27348267</a>  6 Oncogenesis 5 6 2016 Journal Article                   |
| mmp2   | ephb2  | <a href="http://www.ncbi.nlm.nih.gov/entrez/query.fcgi?cmd=Retrieve&amp;db=pubmed&amp;dopt=Abstract&amp;list_uids=27322511">http://www.ncbi.nlm.nih.gov/entrez/query.fcgi?cmd=Retrieve&amp;db=pubmed&amp;dopt=Abstract&amp;list_uids=27322511</a>  6 Environ Toxicol   Jun 2016 JOURNAL ARTICLE  <a href="http://www.ncbi.nlm.nih.gov/entrez/query.fcgi?cmd=Retrieve&amp;db=pubmed&amp;dopt=Abstract&amp;list_uids=27481258">http://www.ncbi.nlm.nih.gov/entrez/query.fcgi?cmd=Retrieve&amp;db=pubmed&amp;dopt=Abstract&amp;list_uids=27481258</a>  6 Lasers Med Sci   Aug 2016 JOURNAL ARTICLE           |
| mmp2   | mmp8   | <a href="http://www.ncbi.nlm.nih.gov/entrez/query.fcgi?cmd=Retrieve&amp;db=pubmed&amp;dopt=Abstract&amp;list_uids=27491937">http://www.ncbi.nlm.nih.gov/entrez/query.fcgi?cmd=Retrieve&amp;db=pubmed&amp;dopt=Abstract&amp;list_uids=27491937</a>  6 Anticancer Agents Med Chem   Aug 2016 JOURNAL ARTICLE                                                                                                                                                                                                                                                                                                |
| mmp2   | mmp1   | <a href="http://www.ncbi.nlm.nih.gov/entrez/query.fcgi?cmd=Retrieve&amp;db=pubmed&amp;dopt=Abstract&amp;list_uids=27491937">http://www.ncbi.nlm.nih.gov/entrez/query.fcgi?cmd=Retrieve&amp;db=pubmed&amp;dopt=Abstract&amp;list_uids=27491937</a>  6 Anticancer Agents Med Chem   Aug 2016 JOURNAL ARTICLE                                                                                                                                                                                                                                                                                                |
| mmp2   | plau   | <a href="http://www.ncbi.nlm.nih.gov/entrez/query.fcgi?cmd=Retrieve&amp;db=pubmed&amp;dopt=Abstract&amp;list_uids=27377307">http://www.ncbi.nlm.nih.gov/entrez/query.fcgi?cmd=Retrieve&amp;db=pubmed&amp;dopt=Abstract&amp;list_uids=27377307</a>  6 Sci Rep 6   2016 Journal Article  <a href="http://www.ncbi.nlm.nih.gov/entrez/query.fcgi?cmd=Retrieve&amp;db=pubmed&amp;dopt=Abstract&amp;list_uids=27527140">http://www.ncbi.nlm.nih.gov/entrez/query.fcgi?cmd=Retrieve&amp;db=pubmed&amp;dopt=Abstract&amp;list_uids=27527140</a>  6 Molecules 21 8  2016 Journal Article                          |
| mmp2   | timp2  | <a href="http://www.ncbi.nlm.nih.gov/entrez/query.fcgi?cmd=Retrieve&amp;db=pubmed&amp;dopt=Abstract&amp;list_uids=27589705">http://www.ncbi.nlm.nih.gov/entrez/query.fcgi?cmd=Retrieve&amp;db=pubmed&amp;dopt=Abstract&amp;list_uids=27589705</a>  6 Molecules 21 9  2016 Journal Article                                                                                                                                                                                                                                                                                                                 |

|      |        |                                                                                                                                                                                                                                                                                                                                                                                                                                                                                                                                                                                                                                                                                                                                                                                                                                                                                                                                                                                                                                                                                                                                                                                                                                                                                                                                                                                                                                                                                                                                                                                                                                                                                                                                                                                                                                                                                                                                                                                                                                                                                                                                                                                                                                                                                                                                                                                                                                                                                                                                                                                                                                                                                                                                                                                                                                                                                                                                                                                                                                                                                                                                                                                                                                                                                                                                                                                                                                                                                                                                                                                                                                                                                                                                                                                                                                                                                                                                                                       |
|------|--------|-----------------------------------------------------------------------------------------------------------------------------------------------------------------------------------------------------------------------------------------------------------------------------------------------------------------------------------------------------------------------------------------------------------------------------------------------------------------------------------------------------------------------------------------------------------------------------------------------------------------------------------------------------------------------------------------------------------------------------------------------------------------------------------------------------------------------------------------------------------------------------------------------------------------------------------------------------------------------------------------------------------------------------------------------------------------------------------------------------------------------------------------------------------------------------------------------------------------------------------------------------------------------------------------------------------------------------------------------------------------------------------------------------------------------------------------------------------------------------------------------------------------------------------------------------------------------------------------------------------------------------------------------------------------------------------------------------------------------------------------------------------------------------------------------------------------------------------------------------------------------------------------------------------------------------------------------------------------------------------------------------------------------------------------------------------------------------------------------------------------------------------------------------------------------------------------------------------------------------------------------------------------------------------------------------------------------------------------------------------------------------------------------------------------------------------------------------------------------------------------------------------------------------------------------------------------------------------------------------------------------------------------------------------------------------------------------------------------------------------------------------------------------------------------------------------------------------------------------------------------------------------------------------------------------------------------------------------------------------------------------------------------------------------------------------------------------------------------------------------------------------------------------------------------------------------------------------------------------------------------------------------------------------------------------------------------------------------------------------------------------------------------------------------------------------------------------------------------------------------------------------------------------------------------------------------------------------------------------------------------------------------------------------------------------------------------------------------------------------------------------------------------------------------------------------------------------------------------------------------------------------------------------------------------------------------------------------------------------|
| mmp2 | timp1  | <a href="http://www.ncbi.nlm.nih.gov/entrez/query.fcgi?cmd=Retrieve&amp;db=pubmed&amp;dopt=Abstract&amp;list_uids=27589705">http://www.ncbi.nlm.nih.gov/entrez/query.fcgi?cmd=Retrieve&amp;db=pubmed&amp;dopt=Abstract&amp;list_uids=27589705</a>  6 Molecules 21 9  2016 Journal Article  <a href="http://www.ncbi.nlm.nih.gov/entrez/query.fcgi?cmd=Retrieve&amp;db=pubmed&amp;dopt=Abstract&amp;list_uids=27260469">http://www.ncbi.nlm.nih.gov/entrez/query.fcgi?cmd=Retrieve&amp;db=pubmed&amp;dopt=Abstract&amp;list_uids=27260469</a>  6 J Nutr Biochem 33 Jul 2016 Journal Article                                                                                                                                                                                                                                                                                                                                                                                                                                                                                                                                                                                                                                                                                                                                                                                                                                                                                                                                                                                                                                                                                                                                                                                                                                                                                                                                                                                                                                                                                                                                                                                                                                                                                                                                                                                                                                                                                                                                                                                                                                                                                                                                                                                                                                                                                                                                                                                                                                                                                                                                                                                                                                                                                                                                                                                                                                                                                                                                                                                                                                                                                                                                                                                                                                                                                                                                                                            |
| mmp2 | pik3ca | <a href="http://www.ncbi.nlm.nih.gov/entrez/query.fcgi?cmd=Retrieve&amp;db=pubmed&amp;dopt=Abstract&amp;list_uids=27600360">http://www.ncbi.nlm.nih.gov/entrez/query.fcgi?cmd=Retrieve&amp;db=pubmed&amp;dopt=Abstract&amp;list_uids=27600360</a>  6 Cell Biol Int  Sep 2016 JOURNAL ARTICLE  <a href="http://www.ncbi.nlm.nih.gov/entrez/query.fcgi?cmd=Retrieve&amp;db=pubmed&amp;dopt=Abstract&amp;list_uids=27470348">http://www.ncbi.nlm.nih.gov/entrez/query.fcgi?cmd=Retrieve&amp;db=pubmed&amp;dopt=Abstract&amp;list_uids=27470348</a>  6 Biomed Pharmacother 82 Aug 2016 Journal Article                                                                                                                                                                                                                                                                                                                                                                                                                                                                                                                                                                                                                                                                                                                                                                                                                                                                                                                                                                                                                                                                                                                                                                                                                                                                                                                                                                                                                                                                                                                                                                                                                                                                                                                                                                                                                                                                                                                                                                                                                                                                                                                                                                                                                                                                                                                                                                                                                                                                                                                                                                                                                                                                                                                                                                                                                                                                                                                                                                                                                                                                                                                                                                                                                                                                                                                                                                    |
| mmp2 | pten   | <a href="http://www.ncbi.nlm.nih.gov/entrez/query.fcgi?cmd=Retrieve&amp;db=pubmed&amp;dopt=Abstract&amp;list_uids=27600360">http://www.ncbi.nlm.nih.gov/entrez/query.fcgi?cmd=Retrieve&amp;db=pubmed&amp;dopt=Abstract&amp;list_uids=27600360</a>  6 Cell Biol Int  Sep 2016 JOURNAL ARTICLE                                                                                                                                                                                                                                                                                                                                                                                                                                                                                                                                                                                                                                                                                                                                                                                                                                                                                                                                                                                                                                                                                                                                                                                                                                                                                                                                                                                                                                                                                                                                                                                                                                                                                                                                                                                                                                                                                                                                                                                                                                                                                                                                                                                                                                                                                                                                                                                                                                                                                                                                                                                                                                                                                                                                                                                                                                                                                                                                                                                                                                                                                                                                                                                                                                                                                                                                                                                                                                                                                                                                                                                                                                                                          |
| mmp2 | mmp9   | <a href="http://www.ncbi.nlm.nih.gov/entrez/query.fcgi?cmd=Retrieve&amp;db=pubmed&amp;dopt=Abstract&amp;list_uids=27589705">http://www.ncbi.nlm.nih.gov/entrez/query.fcgi?cmd=Retrieve&amp;db=pubmed&amp;dopt=Abstract&amp;list_uids=27589705</a>  6 Molecules 21 9  2016 Journal Article  <a href="http://www.ncbi.nlm.nih.gov/entrez/query.fcgi?cmd=Retrieve&amp;db=pubmed&amp;dopt=Abstract&amp;list_uids=27348727">http://www.ncbi.nlm.nih.gov/entrez/query.fcgi?cmd=Retrieve&amp;db=pubmed&amp;dopt=Abstract&amp;list_uids=27348727</a>  6 Environ Toxicol Pharmacol 45 Jul 2016 Journal Article  <a href="http://www.ncbi.nlm.nih.gov/entrez/query.fcgi?cmd=Retrieve&amp;db=pubmed&amp;dopt=Abstract&amp;list_uids=27481258">http://www.ncbi.nlm.nih.gov/entrez/query.fcgi?cmd=Retrieve&amp;db=pubmed&amp;dopt=Abstract&amp;list_uids=27481258</a>  6 Lasers Med Sci  Aug 2016 JOURNAL ARTICLE  <a href="http://www.ncbi.nlm.nih.gov/entrez/query.fcgi?cmd=Retrieve&amp;db=pubmed&amp;dopt=Abstract&amp;list_uids=27511626">http://www.ncbi.nlm.nih.gov/entrez/query.fcgi?cmd=Retrieve&amp;db=pubmed&amp;dopt=Abstract&amp;list_uids=27511626</a>  6 Int J Oncol  Aug 2016 JOURNAL ARTICLE  <a href="http://www.ncbi.nlm.nih.gov/entrez/query.fcgi?cmd=Retrieve&amp;db=pubmed&amp;dopt=Abstract&amp;list_uids=27377307">http://www.ncbi.nlm.nih.gov/entrez/query.fcgi?cmd=Retrieve&amp;db=pubmed&amp;dopt=Abstract&amp;list_uids=27377307</a>  6 Sci Rep 6  2016 Journal Article  <a href="http://www.ncbi.nlm.nih.gov/entrez/query.fcgi?cmd=Retrieve&amp;db=pubmed&amp;dopt=Abstract&amp;list_uids=27527140">http://www.ncbi.nlm.nih.gov/entrez/query.fcgi?cmd=Retrieve&amp;db=pubmed&amp;dopt=Abstract&amp;list_uids=27527140</a>  6 Molecules 21 8  2016 Journal Article  <a href="http://www.ncbi.nlm.nih.gov/entrez/query.fcgi?cmd=Retrieve&amp;db=pubmed&amp;dopt=Abstract&amp;list_uids=27510965">http://www.ncbi.nlm.nih.gov/entrez/query.fcgi?cmd=Retrieve&amp;db=pubmed&amp;dopt=Abstract&amp;list_uids=27510965</a>  6 Biomedicine (Taipei) 6 3 Jun 2016 Journal Article  <a href="http://www.ncbi.nlm.nih.gov/entrez/query.fcgi?cmd=Retrieve&amp;db=pubmed&amp;dopt=Abstract&amp;list_uids=27470348">http://www.ncbi.nlm.nih.gov/entrez/query.fcgi?cmd=Retrieve&amp;db=pubmed&amp;dopt=Abstract&amp;list_uids=27470348</a>  6 Biomed Pharmacother 82 Aug 2016 Journal Article  <a href="http://www.ncbi.nlm.nih.gov/entrez/query.fcgi?cmd=Retrieve&amp;db=pubmed&amp;dopt=Abstract&amp;list_uids=27491937">http://www.ncbi.nlm.nih.gov/entrez/query.fcgi?cmd=Retrieve&amp;db=pubmed&amp;dopt=Abstract&amp;list_uids=27491937</a>  6 Anticancer Agents Med Chem  Aug 2016 JOURNAL ARTICLE  <a href="http://www.ncbi.nlm.nih.gov/entrez/query.fcgi?cmd=Retrieve&amp;db=pubmed&amp;dopt=Abstract&amp;list_uids=27266355">http://www.ncbi.nlm.nih.gov/entrez/query.fcgi?cmd=Retrieve&amp;db=pubmed&amp;dopt=Abstract&amp;list_uids=27266355</a>  6 Zhonghua Yi Xue Za Zhi 96 18 May 2016 English Abstract,Journal Article,Research Support, Non-U.S. Gov't  <a href="http://www.ncbi.nlm.nih.gov/entrez/query.fcgi?cmd=Retrieve&amp;db=pubmed&amp;dopt=Abstract&amp;list_uids=27600360">http://www.ncbi.nlm.nih.gov/entrez/query.fcgi?cmd=Retrieve&amp;db=pubmed&amp;dopt=Abstract&amp;list_uids=27600360</a>  6 Cell Biol Int  Sep 2016 JOURNAL ARTICLE  <a href="http://www.ncbi.nlm.nih.gov/entrez/query.fcgi?cmd=Retrieve&amp;db=pubmed&amp;dopt=Abstract&amp;list_uids=27279714">http://www.ncbi.nlm.nih.gov/entrez/query.fcgi?cmd=Retrieve&amp;db=pubmed&amp;dopt=Abstract&amp;list_uids=27279714</a>  6 Pharmacogn Mag 12 Suppl 2 May 2016 Journal Article  <a href="http://www.ncbi.nlm.nih.gov/entrez/query.fcgi?cmd=Retrieve&amp;db=pubmed&amp;dopt=Abstract&amp;list_uids=27461575">http://www.ncbi.nlm.nih.gov/entrez/query.fcgi?cmd=Retrieve&amp;db=pubmed&amp;dopt=Abstract&amp;list_uids=27461575</a>  6 Oncol Rep 36 3 Sep 2016 Journal |

|       |         |                                                                                                                                                                                                                                                                                                                                                                                                                                                                                                                                                                                                                                                                                                                                                                                                                                                                                                                                                                                                                                                                                                                                                                                                                                                                                                                                                                                                                                                                                                                                                                                                                                                                                                                                                                                                                                                 |
|-------|---------|-------------------------------------------------------------------------------------------------------------------------------------------------------------------------------------------------------------------------------------------------------------------------------------------------------------------------------------------------------------------------------------------------------------------------------------------------------------------------------------------------------------------------------------------------------------------------------------------------------------------------------------------------------------------------------------------------------------------------------------------------------------------------------------------------------------------------------------------------------------------------------------------------------------------------------------------------------------------------------------------------------------------------------------------------------------------------------------------------------------------------------------------------------------------------------------------------------------------------------------------------------------------------------------------------------------------------------------------------------------------------------------------------------------------------------------------------------------------------------------------------------------------------------------------------------------------------------------------------------------------------------------------------------------------------------------------------------------------------------------------------------------------------------------------------------------------------------------------------|
|       |         | <p>Article <a href="http://www.ncbi.nlm.nih.gov/entrez/query.fcgi?cmd=Retrieve&amp;db=pubmed&amp;dopt=Abstract&amp;list_uids=27327035">http://www.ncbi.nlm.nih.gov/entrez/query.fcgi?cmd=Retrieve&amp;db=pubmed&amp;dopt=Abstract&amp;list_uids=27327035</a> 6 J Agric Food Chem 64 27 Jul 2016 Journal</p> <p>Article <a href="http://www.ncbi.nlm.nih.gov/entrez/query.fcgi?cmd=Retrieve&amp;db=pubmed&amp;dopt=Abstract&amp;list_uids=27579534">http://www.ncbi.nlm.nih.gov/entrez/query.fcgi?cmd=Retrieve&amp;db=pubmed&amp;dopt=Abstract&amp;list_uids=27579534</a> 6 Oncotarget   Aug 2016 JOURNAL</p> <p>ARTICLE <a href="http://www.ncbi.nlm.nih.gov/entrez/query.fcgi?cmd=Retrieve&amp;db=pubmed&amp;dopt=Abstract&amp;list_uids=27452283">http://www.ncbi.nlm.nih.gov/entrez/query.fcgi?cmd=Retrieve&amp;db=pubmed&amp;dopt=Abstract&amp;list_uids=27452283</a> 6 Bioorg Med Chem 24 18 Sep 2016 Journal</p> <p>Article <a href="http://www.ncbi.nlm.nih.gov/entrez/query.fcgi?cmd=Retrieve&amp;db=pubmed&amp;dopt=Abstract&amp;list_uids=27572503">http://www.ncbi.nlm.nih.gov/entrez/query.fcgi?cmd=Retrieve&amp;db=pubmed&amp;dopt=Abstract&amp;list_uids=27572503</a> 6 Oncol Rep   Aug 2016 JOURNAL</p> <p>ARTICLE <a href="http://www.ncbi.nlm.nih.gov/entrez/query.fcgi?cmd=Retrieve&amp;db=pubmed&amp;dopt=Abstract&amp;list_uids=27422337">http://www.ncbi.nlm.nih.gov/entrez/query.fcgi?cmd=Retrieve&amp;db=pubmed&amp;dopt=Abstract&amp;list_uids=27422337</a> 6 Bioorg Med Chem Lett 26 16 Aug 2016 Journal</p> <p>Article <a href="http://www.ncbi.nlm.nih.gov/entrez/query.fcgi?cmd=Retrieve&amp;db=pubmed&amp;dopt=Abstract&amp;list_uids=27324095">http://www.ncbi.nlm.nih.gov/entrez/query.fcgi?cmd=Retrieve&amp;db=pubmed&amp;dopt=Abstract&amp;list_uids=27324095</a> 6 Placenta 43   Jul 2016 Journal Article</p> |
| mmp2  | mmp13   | <p><a href="http://www.ncbi.nlm.nih.gov/entrez/query.fcgi?cmd=Retrieve&amp;db=pubmed&amp;dopt=Abstract&amp;list_uids=27600927">http://www.ncbi.nlm.nih.gov/entrez/query.fcgi?cmd=Retrieve&amp;db=pubmed&amp;dopt=Abstract&amp;list_uids=27600927</a> 6 J Dermatol Sci   Jun 2016 JOURNAL</p> <p>ARTICLE <a href="http://www.ncbi.nlm.nih.gov/entrez/query.fcgi?cmd=Retrieve&amp;db=pubmed&amp;dopt=Abstract&amp;list_uids=27491937">http://www.ncbi.nlm.nih.gov/entrez/query.fcgi?cmd=Retrieve&amp;db=pubmed&amp;dopt=Abstract&amp;list_uids=27491937</a> 6 Anticancer Agents Med Chem   Aug 2016 JOURNAL ARTICLE</p>                                                                                                                                                                                                                                                                                                                                                                                                                                                                                                                                                                                                                                                                                                                                                                                                                                                                                                                                                                                                                                                                                                                                                                                                                           |
| mmp2  | mapk8   | <p><a href="http://www.ncbi.nlm.nih.gov/entrez/query.fcgi?cmd=Retrieve&amp;db=pubmed&amp;dopt=Abstract&amp;list_uids=27602114">http://www.ncbi.nlm.nih.gov/entrez/query.fcgi?cmd=Retrieve&amp;db=pubmed&amp;dopt=Abstract&amp;list_uids=27602114</a> 6 Oncol Lett 12 3 Sep 2016 JOURNAL</p> <p>ARTICLE <a href="http://www.ncbi.nlm.nih.gov/entrez/query.fcgi?cmd=Retrieve&amp;db=pubmed&amp;dopt=Abstract&amp;list_uids=27527140">http://www.ncbi.nlm.nih.gov/entrez/query.fcgi?cmd=Retrieve&amp;db=pubmed&amp;dopt=Abstract&amp;list_uids=27527140</a> 6 Molecules 21 8  2016 Journal Article</p>                                                                                                                                                                                                                                                                                                                                                                                                                                                                                                                                                                                                                                                                                                                                                                                                                                                                                                                                                                                                                                                                                                                                                                                                                                             |
| timp1 | ephb2   | <a href="http://www.ncbi.nlm.nih.gov/entrez/query.fcgi?cmd=Retrieve&amp;db=pubmed&amp;dopt=Abstract&amp;list_uids=27362846">http://www.ncbi.nlm.nih.gov/entrez/query.fcgi?cmd=Retrieve&amp;db=pubmed&amp;dopt=Abstract&amp;list_uids=27362846</a>  6 PLoS One 11 6  2016 Journal Article                                                                                                                                                                                                                                                                                                                                                                                                                                                                                                                                                                                                                                                                                                                                                                                                                                                                                                                                                                                                                                                                                                                                                                                                                                                                                                                                                                                                                                                                                                                                                        |
| timp1 | mapk14  | <a href="http://www.ncbi.nlm.nih.gov/entrez/query.fcgi?cmd=Retrieve&amp;db=pubmed&amp;dopt=Abstract&amp;list_uids=27476935">http://www.ncbi.nlm.nih.gov/entrez/query.fcgi?cmd=Retrieve&amp;db=pubmed&amp;dopt=Abstract&amp;list_uids=27476935</a>  6 Biol Pharm Bull 39 8  2016 Journal Article                                                                                                                                                                                                                                                                                                                                                                                                                                                                                                                                                                                                                                                                                                                                                                                                                                                                                                                                                                                                                                                                                                                                                                                                                                                                                                                                                                                                                                                                                                                                                 |
| timp1 | mapk3   | <a href="http://www.ncbi.nlm.nih.gov/entrez/query.fcgi?cmd=Retrieve&amp;db=pubmed&amp;dopt=Abstract&amp;list_uids=27476935">http://www.ncbi.nlm.nih.gov/entrez/query.fcgi?cmd=Retrieve&amp;db=pubmed&amp;dopt=Abstract&amp;list_uids=27476935</a>  6 Biol Pharm Bull 39 8  2016 Journal Article                                                                                                                                                                                                                                                                                                                                                                                                                                                                                                                                                                                                                                                                                                                                                                                                                                                                                                                                                                                                                                                                                                                                                                                                                                                                                                                                                                                                                                                                                                                                                 |
| timp1 | 2.6.1.7 | <a href="http://www.ncbi.nlm.nih.gov/entrez/query.fcgi?cmd=Retrieve&amp;db=pubmed&amp;dopt=Abstract&amp;list_uids=27476935">http://www.ncbi.nlm.nih.gov/entrez/query.fcgi?cmd=Retrieve&amp;db=pubmed&amp;dopt=Abstract&amp;list_uids=27476935</a>  6 Biol Pharm Bull 39 8  2016 Journal Article                                                                                                                                                                                                                                                                                                                                                                                                                                                                                                                                                                                                                                                                                                                                                                                                                                                                                                                                                                                                                                                                                                                                                                                                                                                                                                                                                                                                                                                                                                                                                 |
| timp1 | akt1    | <a href="http://www.ncbi.nlm.nih.gov/entrez/query.fcgi?cmd=Retrieve&amp;db=pubmed&amp;dopt=Abstract&amp;list_uids=27572091">http://www.ncbi.nlm.nih.gov/entrez/query.fcgi?cmd=Retrieve&amp;db=pubmed&amp;dopt=Abstract&amp;list_uids=27572091</a>  6 Mol Med Rep   Aug 2016 JOURNAL ARTICLE                                                                                                                                                                                                                                                                                                                                                                                                                                                                                                                                                                                                                                                                                                                                                                                                                                                                                                                                                                                                                                                                                                                                                                                                                                                                                                                                                                                                                                                                                                                                                     |
| timp1 | pik3ca  | <a href="http://www.ncbi.nlm.nih.gov/entrez/query.fcgi?cmd=Retrieve&amp;db=pubmed&amp;dopt=Abstract&amp;list_uids=27572091">http://www.ncbi.nlm.nih.gov/entrez/query.fcgi?cmd=Retrieve&amp;db=pubmed&amp;dopt=Abstract&amp;list_uids=27572091</a>  6 Mol Med Rep   Aug 2016 JOURNAL ARTICLE                                                                                                                                                                                                                                                                                                                                                                                                                                                                                                                                                                                                                                                                                                                                                                                                                                                                                                                                                                                                                                                                                                                                                                                                                                                                                                                                                                                                                                                                                                                                                     |
| timp1 | timp2   | <a href="http://www.ncbi.nlm.nih.gov/entrez/query.fcgi?cmd=Retrieve&amp;db=pubmed&amp;dopt=Abstract&amp;list_uids=27589705">http://www.ncbi.nlm.nih.gov/entrez/query.fcgi?cmd=Retrieve&amp;db=pubmed&amp;dopt=Abstract&amp;list_uids=27589705</a>  6 Molecules 21 9  2016 Journal Article                                                                                                                                                                                                                                                                                                                                                                                                                                                                                                                                                                                                                                                                                                                                                                                                                                                                                                                                                                                                                                                                                                                                                                                                                                                                                                                                                                                                                                                                                                                                                       |
| pebp4 | itk     | <a href="http://www.ncbi.nlm.nih.gov/entrez/query.fcgi?cmd=Retrieve&amp;db=pubmed&amp;dopt=Abstract&amp;list_uids=27261570">http://www.ncbi.nlm.nih.gov/entrez/query.fcgi?cmd=Retrieve&amp;db=pubmed&amp;dopt=Abstract&amp;list_uids=27261570</a>  6 Biomed Pharmacother 81   Jul 2016 Journal Article                                                                                                                                                                                                                                                                                                                                                                                                                                                                                                                                                                                                                                                                                                                                                                                                                                                                                                                                                                                                                                                                                                                                                                                                                                                                                                                                                                                                                                                                                                                                          |



|       |        |                                                                                                                                                                                                                                                                                                           |
|-------|--------|-----------------------------------------------------------------------------------------------------------------------------------------------------------------------------------------------------------------------------------------------------------------------------------------------------------|
| pebp4 | pebp1  | <a href="http://www.ncbi.nlm.nih.gov/entrez/query.fcgi?cmd=Retrieve&amp;db=pubmed&amp;dopt=Abstract&amp;list_uids=27261570">http://www.ncbi.nlm.nih.gov/entrez/query.fcgi?cmd=Retrieve&amp;db=pubmed&amp;dopt=Abstract&amp;list_uids=27261570</a>  6 Biomed Pharmacother 81  Jul 2016 JOURNAL ARTICLE     |
| myc   | ldha   | <a href="http://www.ncbi.nlm.nih.gov/entrez/query.fcgi?cmd=Retrieve&amp;db=pubmed&amp;dopt=Abstract&amp;list_uids=27261617">http://www.ncbi.nlm.nih.gov/entrez/query.fcgi?cmd=Retrieve&amp;db=pubmed&amp;dopt=Abstract&amp;list_uids=27261617</a>  6 Biomed Pharmacother 81  Jul 2016 JOURNAL ARTICLE     |
| myc   | vegfa  | <a href="http://www.ncbi.nlm.nih.gov/entrez/query.fcgi?cmd=Retrieve&amp;db=pubmed&amp;dopt=Abstract&amp;list_uids=27415751">http://www.ncbi.nlm.nih.gov/entrez/query.fcgi?cmd=Retrieve&amp;db=pubmed&amp;dopt=Abstract&amp;list_uids=27415751</a>  6 Cancer Biol Ther   Jul 2016 JOURNAL ARTICLE          |
| myc   | bcl2   | <a href="http://www.ncbi.nlm.nih.gov/entrez/query.fcgi?cmd=Retrieve&amp;db=pubmed&amp;dopt=Abstract&amp;list_uids=27415751">http://www.ncbi.nlm.nih.gov/entrez/query.fcgi?cmd=Retrieve&amp;db=pubmed&amp;dopt=Abstract&amp;list_uids=27415751</a>  6 Cancer Biol Ther   Jul 2016 JOURNAL ARTICLE          |
| myc   | bcl2l1 | <a href="http://www.ncbi.nlm.nih.gov/entrez/query.fcgi?cmd=Retrieve&amp;db=pubmed&amp;dopt=Abstract&amp;list_uids=27415751">http://www.ncbi.nlm.nih.gov/entrez/query.fcgi?cmd=Retrieve&amp;db=pubmed&amp;dopt=Abstract&amp;list_uids=27415751</a>  6 Cancer Biol Ther   Jul 2016 JOURNAL ARTICLE          |
| myc   | hcc    | <a href="http://www.ncbi.nlm.nih.gov/entrez/query.fcgi?cmd=Retrieve&amp;db=pubmed&amp;dopt=Abstract&amp;list_uids=27446476">http://www.ncbi.nlm.nih.gov/entrez/query.fcgi?cmd=Retrieve&amp;db=pubmed&amp;dopt=Abstract&amp;list_uids=27446476</a>  6 Oncol Lett 12 2 Aug 2016 JOURNAL ARTICLE             |
| myc   | rhoa   | <a href="http://www.ncbi.nlm.nih.gov/entrez/query.fcgi?cmd=Retrieve&amp;db=pubmed&amp;dopt=Abstract&amp;list_uids=27446476">http://www.ncbi.nlm.nih.gov/entrez/query.fcgi?cmd=Retrieve&amp;db=pubmed&amp;dopt=Abstract&amp;list_uids=27446476</a>  6 Oncol Lett 12 2 Aug 2016 JOURNAL ARTICLE             |
| myc   | dlc1   | <a href="http://www.ncbi.nlm.nih.gov/entrez/query.fcgi?cmd=Retrieve&amp;db=pubmed&amp;dopt=Abstract&amp;list_uids=27446476">http://www.ncbi.nlm.nih.gov/entrez/query.fcgi?cmd=Retrieve&amp;db=pubmed&amp;dopt=Abstract&amp;list_uids=27446476</a>  6 Oncol Lett 12 2 Aug 2016 JOURNAL ARTICLE             |
| myc   | gsc    | <a href="http://www.ncbi.nlm.nih.gov/entrez/query.fcgi?cmd=Retrieve&amp;db=pubmed&amp;dopt=Abstract&amp;list_uids=27472461">http://www.ncbi.nlm.nih.gov/entrez/query.fcgi?cmd=Retrieve&amp;db=pubmed&amp;dopt=Abstract&amp;list_uids=27472461</a>  6 Oncotarget   Jul 2016 JOURNAL ARTICLE                |
| myc   | rbpj   | <a href="http://www.ncbi.nlm.nih.gov/entrez/query.fcgi?cmd=Retrieve&amp;db=pubmed&amp;dopt=Abstract&amp;list_uids=27472461">http://www.ncbi.nlm.nih.gov/entrez/query.fcgi?cmd=Retrieve&amp;db=pubmed&amp;dopt=Abstract&amp;list_uids=27472461</a>  6 Oncotarget   Jul 2016 JOURNAL ARTICLE                |
| myc   | tp53   | <a href="http://www.ncbi.nlm.nih.gov/entrez/query.fcgi?cmd=Retrieve&amp;db=pubmed&amp;dopt=Abstract&amp;list_uids=27557535">http://www.ncbi.nlm.nih.gov/entrez/query.fcgi?cmd=Retrieve&amp;db=pubmed&amp;dopt=Abstract&amp;list_uids=27557535</a>  6 Recent Results Cancer Res 207   2016 JOURNAL ARTICLE |
| myc   | ahr    | <a href="http://www.ncbi.nlm.nih.gov/entrez/query.fcgi?cmd=Retrieve&amp;db=pubmed&amp;dopt=Abstract&amp;list_uids=27601158">http://www.ncbi.nlm.nih.gov/entrez/query.fcgi?cmd=Retrieve&amp;db=pubmed&amp;dopt=Abstract&amp;list_uids=27601158</a>  6 Int J Oncol   Aug 2016 JOURNAL ARTICLE               |
| cd44  | tspan8 | <a href="http://www.ncbi.nlm.nih.gov/entrez/query.fcgi?cmd=Retrieve&amp;db=pubmed&amp;dopt=Abstract&amp;list_uids=27419629">http://www.ncbi.nlm.nih.gov/entrez/query.fcgi?cmd=Retrieve&amp;db=pubmed&amp;dopt=Abstract&amp;list_uids=27419629</a>  6 Oncotarget   Jul 2016 JOURNAL ARTICLE                |
| cd44  | stat6  | <a href="http://www.ncbi.nlm.nih.gov/entrez/query.fcgi?cmd=Retrieve&amp;db=pubmed&amp;dopt=Abstract&amp;list_uids=27533463">http://www.ncbi.nlm.nih.gov/entrez/query.fcgi?cmd=Retrieve&amp;db=pubmed&amp;dopt=Abstract&amp;list_uids=27533463</a>  6 Oncotarget   Aug 2016 JOURNAL ARTICLE                |
| cd44  | alcam  | <a href="http://www.ncbi.nlm.nih.gov/entrez/query.fcgi?cmd=Retrieve&amp;db=pubmed&amp;dopt=Abstract&amp;list_uids=27533463">http://www.ncbi.nlm.nih.gov/entrez/query.fcgi?cmd=Retrieve&amp;db=pubmed&amp;dopt=Abstract&amp;list_uids=27533463</a>  6 Oncotarget   Aug 2016 JOURNAL ARTICLE                |
| cd44  | prom1  | <a href="http://www.ncbi.nlm.nih.gov/entrez/query.fcgi?cmd=Retrieve&amp;db=pubmed&amp;dopt=Abstract&amp;list_uids=27533463">http://www.ncbi.nlm.nih.gov/entrez/query.fcgi?cmd=Retrieve&amp;db=pubmed&amp;dopt=Abstract&amp;list_uids=27533463</a>  6 Oncotarget   Aug 2016 JOURNAL ARTICLE                |
| cd44  | pcsk1  | <a href="http://www.ncbi.nlm.nih.gov/entrez/query.fcgi?cmd=Retrieve&amp;db=pubmed&amp;dopt=Abstract&amp;list_uids=27569589">http://www.ncbi.nlm.nih.gov/entrez/query.fcgi?cmd=Retrieve&amp;db=pubmed&amp;dopt=Abstract&amp;list_uids=27569589</a>  6 Life Sci   Aug 2016 JOURNAL ARTICLE                  |
| cd44  | axpc1  | <a href="http://www.ncbi.nlm.nih.gov/entrez/query.fcgi?cmd=Retrieve&amp;db=pubmed&amp;dopt=Abstract&amp;list_uids=27569589">http://www.ncbi.nlm.nih.gov/entrez/query.fcgi?cmd=Retrieve&amp;db=pubmed&amp;dopt=Abstract&amp;list_uids=27569589</a>  6 Life Sci   Aug 2016 JOURNAL ARTICLE                  |

|        |          |                                                                                                                                                                                                                                                                                                                                                                                                                                                                                                                                                                                                                                                                                                                                                                                                                                                                                                                                                                   |
|--------|----------|-------------------------------------------------------------------------------------------------------------------------------------------------------------------------------------------------------------------------------------------------------------------------------------------------------------------------------------------------------------------------------------------------------------------------------------------------------------------------------------------------------------------------------------------------------------------------------------------------------------------------------------------------------------------------------------------------------------------------------------------------------------------------------------------------------------------------------------------------------------------------------------------------------------------------------------------------------------------|
| itga6  | cd44     | <a href="http://www.ncbi.nlm.nih.gov/entrez/query.fcgi?cmd=Retrieve&amp;db=pubmed&amp;dopt=Abstract&amp;list_uids=27261625">http://www.ncbi.nlm.nih.gov/entrez/query.fcgi?cmd=Retrieve&amp;db=pubmed&amp;dopt=Abstract&amp;list_uids=27261625</a>  6 Biomed Pharmacother 81  Jul 2016 Journal Article                                                                                                                                                                                                                                                                                                                                                                                                                                                                                                                                                                                                                                                             |
| twist2 | cd44     | <a href="http://www.ncbi.nlm.nih.gov/entrez/query.fcgi?cmd=Retrieve&amp;db=pubmed&amp;dopt=Abstract&amp;list_uids=27261625">http://www.ncbi.nlm.nih.gov/entrez/query.fcgi?cmd=Retrieve&amp;db=pubmed&amp;dopt=Abstract&amp;list_uids=27261625</a>  6 Biomed Pharmacother 81  Jul 2016 Journal Article                                                                                                                                                                                                                                                                                                                                                                                                                                                                                                                                                                                                                                                             |
| twist2 | itga6    | <a href="http://www.ncbi.nlm.nih.gov/entrez/query.fcgi?cmd=Retrieve&amp;db=pubmed&amp;dopt=Abstract&amp;list_uids=27261625">http://www.ncbi.nlm.nih.gov/entrez/query.fcgi?cmd=Retrieve&amp;db=pubmed&amp;dopt=Abstract&amp;list_uids=27261625</a>  6 Biomed Pharmacother 81  Jul 2016 Journal Article                                                                                                                                                                                                                                                                                                                                                                                                                                                                                                                                                                                                                                                             |
| mmp9   | hcc      | <a href="http://www.ncbi.nlm.nih.gov/entrez/query.fcgi?cmd=Retrieve&amp;db=pubmed&amp;dopt=Abstract&amp;list_uids=27266355">http://www.ncbi.nlm.nih.gov/entrez/query.fcgi?cmd=Retrieve&amp;db=pubmed&amp;dopt=Abstract&amp;list_uids=27266355</a>  6 Zhonghua Yi Xue Za Zhi 96 18 May 2016 English Abstract,Journal Article,Research Support, Non-U.S. Gov't                                                                                                                                                                                                                                                                                                                                                                                                                                                                                                                                                                                                      |
| mmp9   | ervk2    | <a href="http://www.ncbi.nlm.nih.gov/entrez/query.fcgi?cmd=Retrieve&amp;db=pubmed&amp;dopt=Abstract&amp;list_uids=27266355">http://www.ncbi.nlm.nih.gov/entrez/query.fcgi?cmd=Retrieve&amp;db=pubmed&amp;dopt=Abstract&amp;list_uids=27266355</a>  6 Zhonghua Yi Xue Za Zhi 96 18 May 2016 English Abstract,Journal Article,Research Support, Non-U.S. Gov't                                                                                                                                                                                                                                                                                                                                                                                                                                                                                                                                                                                                      |
| mmp9   | phpt1    | <a href="http://www.ncbi.nlm.nih.gov/entrez/query.fcgi?cmd=Retrieve&amp;db=pubmed&amp;dopt=Abstract&amp;list_uids=27268917">http://www.ncbi.nlm.nih.gov/entrez/query.fcgi?cmd=Retrieve&amp;db=pubmed&amp;dopt=Abstract&amp;list_uids=27268917</a>  6 Neoplasma 63 4  2016 Journal Article                                                                                                                                                                                                                                                                                                                                                                                                                                                                                                                                                                                                                                                                         |
| mmp9   | rela     | <a href="http://www.ncbi.nlm.nih.gov/entrez/query.fcgi?cmd=Retrieve&amp;db=pubmed&amp;dopt=Abstract&amp;list_uids=27279714">http://www.ncbi.nlm.nih.gov/entrez/query.fcgi?cmd=Retrieve&amp;db=pubmed&amp;dopt=Abstract&amp;list_uids=27279714</a>  6 Pharmacogn Mag 12 Suppl 2 May 2016 Journal Article                                                                                                                                                                                                                                                                                                                                                                                                                                                                                                                                                                                                                                                           |
| mmp9   | tlr4     | <a href="http://www.ncbi.nlm.nih.gov/entrez/query.fcgi?cmd=Retrieve&amp;db=pubmed&amp;dopt=Abstract&amp;list_uids=27279714">http://www.ncbi.nlm.nih.gov/entrez/query.fcgi?cmd=Retrieve&amp;db=pubmed&amp;dopt=Abstract&amp;list_uids=27279714</a>  6 Pharmacogn Mag 12 Suppl 2 May 2016 Journal Article                                                                                                                                                                                                                                                                                                                                                                                                                                                                                                                                                                                                                                                           |
| mmp9   | stat3    | <a href="http://www.ncbi.nlm.nih.gov/entrez/query.fcgi?cmd=Retrieve&amp;db=pubmed&amp;dopt=Abstract&amp;list_uids=27353107">http://www.ncbi.nlm.nih.gov/entrez/query.fcgi?cmd=Retrieve&amp;db=pubmed&amp;dopt=Abstract&amp;list_uids=27353107</a>  6 Zhonghua Wei Chang Wai Ke Za Zhi 19 6 Jun 2016 English Abstract,Journal Article                                                                                                                                                                                                                                                                                                                                                                                                                                                                                                                                                                                                                              |
| mmp9   | il17a    | <a href="http://www.ncbi.nlm.nih.gov/entrez/query.fcgi?cmd=Retrieve&amp;db=pubmed&amp;dopt=Abstract&amp;list_uids=27353107">http://www.ncbi.nlm.nih.gov/entrez/query.fcgi?cmd=Retrieve&amp;db=pubmed&amp;dopt=Abstract&amp;list_uids=27353107</a>  6 Zhonghua Wei Chang Wai Ke Za Zhi 19 6 Jun 2016 English Abstract,Journal Article                                                                                                                                                                                                                                                                                                                                                                                                                                                                                                                                                                                                                              |
| mmp9   | src      | <a href="http://www.ncbi.nlm.nih.gov/entrez/query.fcgi?cmd=Retrieve&amp;db=pubmed&amp;dopt=Abstract&amp;list_uids=27422337">http://www.ncbi.nlm.nih.gov/entrez/query.fcgi?cmd=Retrieve&amp;db=pubmed&amp;dopt=Abstract&amp;list_uids=27422337</a>  6 Bioorg Med Chem Lett 26 16 Aug 2016 Journal Article                                                                                                                                                                                                                                                                                                                                                                                                                                                                                                                                                                                                                                                          |
| mmp9   | mapk14   | <a href="http://www.ncbi.nlm.nih.gov/entrez/query.fcgi?cmd=Retrieve&amp;db=pubmed&amp;dopt=Abstract&amp;list_uids=27320884">http://www.ncbi.nlm.nih.gov/entrez/query.fcgi?cmd=Retrieve&amp;db=pubmed&amp;dopt=Abstract&amp;list_uids=27320884</a>  6 Nan Fang Yi Ke Da Xue Xue Bao 36 6 Jun 2016 English Abstract,Journal Article,Research Support, Non-U.S. Gov't  <a href="http://www.ncbi.nlm.nih.gov/entrez/query.fcgi?cmd=Retrieve&amp;db=pubmed&amp;dopt=Abstract&amp;list_uids=27461575">http://www.ncbi.nlm.nih.gov/entrez/query.fcgi?cmd=Retrieve&amp;db=pubmed&amp;dopt=Abstract&amp;list_uids=27461575</a>  6 Oncol Rep 36 3 Sep 2016 Journal Article  <a href="http://www.ncbi.nlm.nih.gov/entrez/query.fcgi?cmd=Retrieve&amp;db=pubmed&amp;dopt=Abstract&amp;list_uids=27476935">http://www.ncbi.nlm.nih.gov/entrez/query.fcgi?cmd=Retrieve&amp;db=pubmed&amp;dopt=Abstract&amp;list_uids=27476935</a>  6 Biol Pharm Bull 39 8  2016 Journal Article |
| mmp9   | 2.6.1.77 | <a href="http://www.ncbi.nlm.nih.gov/entrez/query.fcgi?cmd=Retrieve&amp;db=pubmed&amp;dopt=Abstract&amp;list_uids=27476935">http://www.ncbi.nlm.nih.gov/entrez/query.fcgi?cmd=Retrieve&amp;db=pubmed&amp;dopt=Abstract&amp;list_uids=27476935</a>  6 Biol Pharm Bull 39 8  2016 Journal Article                                                                                                                                                                                                                                                                                                                                                                                                                                                                                                                                                                                                                                                                   |
| mmp9   | mmp13    | <a href="http://www.ncbi.nlm.nih.gov/entrez/query.fcgi?cmd=Retrieve&amp;db=pubmed&amp;dopt=Abstract&amp;list_uids=27491937">http://www.ncbi.nlm.nih.gov/entrez/query.fcgi?cmd=Retrieve&amp;db=pubmed&amp;dopt=Abstract&amp;list_uids=27491937</a>  6 Anticancer Agents Med Chem   Aug 2016 JOURNAL ARTICLE                                                                                                                                                                                                                                                                                                                                                                                                                                                                                                                                                                                                                                                        |
| mmp9   | mmp8     | <a href="http://www.ncbi.nlm.nih.gov/entrez/query.fcgi?cmd=Retrieve&amp;db=pubmed&amp;dopt=Abstract&amp;list_uids=27491937">http://www.ncbi.nlm.nih.gov/entrez/query.fcgi?cmd=Retrieve&amp;db=pubmed&amp;dopt=Abstract&amp;list_uids=27491937</a>  6 Anticancer Agents Med Chem   Aug 2016 JOURNAL ARTICLE                                                                                                                                                                                                                                                                                                                                                                                                                                                                                                                                                                                                                                                        |
| mmp9   | mmp1     | <a href="http://www.ncbi.nlm.nih.gov/entrez/query.fcgi?cmd=Retrieve&amp;db=pubmed&amp;dopt=Abstract&amp;list_uids=27491937">http://www.ncbi.nlm.nih.gov/entrez/query.fcgi?cmd=Retrieve&amp;db=pubmed&amp;dopt=Abstract&amp;list_uids=27491937</a>  6 Anticancer Agents Med Chem   Aug 2016 JOURNAL ARTICLE                                                                                                                                                                                                                                                                                                                                                                                                                                                                                                                                                                                                                                                        |

|       |        |                                                                                                                                                                                                                                                                                                                                                                                                                                                                                                                                                                                                                                                                                                                                                                                                                                                                                              |
|-------|--------|----------------------------------------------------------------------------------------------------------------------------------------------------------------------------------------------------------------------------------------------------------------------------------------------------------------------------------------------------------------------------------------------------------------------------------------------------------------------------------------------------------------------------------------------------------------------------------------------------------------------------------------------------------------------------------------------------------------------------------------------------------------------------------------------------------------------------------------------------------------------------------------------|
| mmp9  | plau   | <a href="http://www.ncbi.nlm.nih.gov/entrez/query.fcgi?cmd=Retrieve&amp;db=pubmed&amp;dopt=Abstract&amp;list_uids=27377307">http://www.ncbi.nlm.nih.gov/entrez/query.fcgi?cmd=Retrieve&amp;db=pubmed&amp;dopt=Abstract&amp;list_uids=27377307</a>  6 Sci Rep 6   2016 Journal Article  <a href="http://www.ncbi.nlm.nih.gov/entrez/query.fcgi?cmd=Retrieve&amp;db=pubmed&amp;dopt=Abstract&amp;list_uids=27527140">http://www.ncbi.nlm.nih.gov/entrez/query.fcgi?cmd=Retrieve&amp;db=pubmed&amp;dopt=Abstract&amp;list_uids=27527140</a>  6 Molecules 21 8  2016 Journal Article                                                                                                                                                                                                                                                                                                             |
| mmp9  | ptk2   | <a href="http://www.ncbi.nlm.nih.gov/entrez/query.fcgi?cmd=Retrieve&amp;db=pubmed&amp;dopt=Abstract&amp;list_uids=27573547">http://www.ncbi.nlm.nih.gov/entrez/query.fcgi?cmd=Retrieve&amp;db=pubmed&amp;dopt=Abstract&amp;list_uids=27573547</a>  6 Int J Oncol 49 3 Sep 2016 Journal Article  <a href="http://www.ncbi.nlm.nih.gov/entrez/query.fcgi?cmd=Retrieve&amp;db=pubmed&amp;dopt=Abstract&amp;list_uids=27422337">http://www.ncbi.nlm.nih.gov/entrez/query.fcgi?cmd=Retrieve&amp;db=pubmed&amp;dopt=Abstract&amp;list_uids=27422337</a>  6 Bioorg Med Chem Lett 26 16 Aug 2016 Journal Article                                                                                                                                                                                                                                                                                     |
| mmp9  | timp2  | <a href="http://www.ncbi.nlm.nih.gov/entrez/query.fcgi?cmd=Retrieve&amp;db=pubmed&amp;dopt=Abstract&amp;list_uids=27589705">http://www.ncbi.nlm.nih.gov/entrez/query.fcgi?cmd=Retrieve&amp;db=pubmed&amp;dopt=Abstract&amp;list_uids=27589705</a>  6 Molecules 21 9  2016 Journal Article                                                                                                                                                                                                                                                                                                                                                                                                                                                                                                                                                                                                    |
| mmp9  | timp1  | <a href="http://www.ncbi.nlm.nih.gov/entrez/query.fcgi?cmd=Retrieve&amp;db=pubmed&amp;dopt=Abstract&amp;list_uids=27589705">http://www.ncbi.nlm.nih.gov/entrez/query.fcgi?cmd=Retrieve&amp;db=pubmed&amp;dopt=Abstract&amp;list_uids=27589705</a>  6 Molecules 21 9  2016 Journal Article  <a href="http://www.ncbi.nlm.nih.gov/entrez/query.fcgi?cmd=Retrieve&amp;db=pubmed&amp;dopt=Abstract&amp;list_uids=27596524">http://www.ncbi.nlm.nih.gov/entrez/query.fcgi?cmd=Retrieve&amp;db=pubmed&amp;dopt=Abstract&amp;list_uids=27596524</a>  6 Toxicol In Vitro   Sep 2016 JOURNAL ARTICLE  <a href="http://www.ncbi.nlm.nih.gov/entrez/query.fcgi?cmd=Retrieve&amp;db=pubmed&amp;dopt=Abstract&amp;list_uids=27476935">http://www.ncbi.nlm.nih.gov/entrez/query.fcgi?cmd=Retrieve&amp;db=pubmed&amp;dopt=Abstract&amp;list_uids=27476935</a>  6 Biol Pharm Bull 39 8  2016 Journal Article |
| mmp9  | pik3ca | <a href="http://www.ncbi.nlm.nih.gov/entrez/query.fcgi?cmd=Retrieve&amp;db=pubmed&amp;dopt=Abstract&amp;list_uids=27600360">http://www.ncbi.nlm.nih.gov/entrez/query.fcgi?cmd=Retrieve&amp;db=pubmed&amp;dopt=Abstract&amp;list_uids=27600360</a>  6 Cell Biol Int   Sep 2016 JOURNAL ARTICLE  <a href="http://www.ncbi.nlm.nih.gov/entrez/query.fcgi?cmd=Retrieve&amp;db=pubmed&amp;dopt=Abstract&amp;list_uids=27470348">http://www.ncbi.nlm.nih.gov/entrez/query.fcgi?cmd=Retrieve&amp;db=pubmed&amp;dopt=Abstract&amp;list_uids=27470348</a>  6 Biomed Pharmacother 82  Aug 2016 Journal Article                                                                                                                                                                                                                                                                                         |
| mmp9  | pten   | <a href="http://www.ncbi.nlm.nih.gov/entrez/query.fcgi?cmd=Retrieve&amp;db=pubmed&amp;dopt=Abstract&amp;list_uids=27600360">http://www.ncbi.nlm.nih.gov/entrez/query.fcgi?cmd=Retrieve&amp;db=pubmed&amp;dopt=Abstract&amp;list_uids=27600360</a>  6 Cell Biol Int   Sep 2016 JOURNAL ARTICLE                                                                                                                                                                                                                                                                                                                                                                                                                                                                                                                                                                                                |
| mmp9  | ahr    | <a href="http://www.ncbi.nlm.nih.gov/entrez/query.fcgi?cmd=Retrieve&amp;db=pubmed&amp;dopt=Abstract&amp;list_uids=27601158">http://www.ncbi.nlm.nih.gov/entrez/query.fcgi?cmd=Retrieve&amp;db=pubmed&amp;dopt=Abstract&amp;list_uids=27601158</a>  6 Int J Oncol   Aug 2016 JOURNAL ARTICLE                                                                                                                                                                                                                                                                                                                                                                                                                                                                                                                                                                                                  |
| mmp9  | myc    | <a href="http://www.ncbi.nlm.nih.gov/entrez/query.fcgi?cmd=Retrieve&amp;db=pubmed&amp;dopt=Abstract&amp;list_uids=27601158">http://www.ncbi.nlm.nih.gov/entrez/query.fcgi?cmd=Retrieve&amp;db=pubmed&amp;dopt=Abstract&amp;list_uids=27601158</a>  6 Int J Oncol   Aug 2016 JOURNAL ARTICLE                                                                                                                                                                                                                                                                                                                                                                                                                                                                                                                                                                                                  |
| ervk2 | yap1   | <a href="http://www.ncbi.nlm.nih.gov/entrez/query.fcgi?cmd=Retrieve&amp;db=pubmed&amp;dopt=Abstract&amp;list_uids=27399496">http://www.ncbi.nlm.nih.gov/entrez/query.fcgi?cmd=Retrieve&amp;db=pubmed&amp;dopt=Abstract&amp;list_uids=27399496</a>  6 Neurosurgery 63 Suppl 1  Aug 2016 Journal Article                                                                                                                                                                                                                                                                                                                                                                                                                                                                                                                                                                                       |
| ervk2 | ervwe1 | <a href="http://www.ncbi.nlm.nih.gov/entrez/query.fcgi?cmd=Retrieve&amp;db=pubmed&amp;dopt=Abstract&amp;list_uids=27557521">http://www.ncbi.nlm.nih.gov/entrez/query.fcgi?cmd=Retrieve&amp;db=pubmed&amp;dopt=Abstract&amp;list_uids=27557521</a>  6 Oncotarget   Aug 2016 JOURNAL ARTICLE                                                                                                                                                                                                                                                                                                                                                                                                                                                                                                                                                                                                   |
| ervk2 | rfxank | <a href="http://www.ncbi.nlm.nih.gov/entrez/query.fcgi?cmd=Retrieve&amp;db=pubmed&amp;dopt=Abstract&amp;list_uids=27578985">http://www.ncbi.nlm.nih.gov/entrez/query.fcgi?cmd=Retrieve&amp;db=pubmed&amp;dopt=Abstract&amp;list_uids=27578985</a>  6 Oncotargets Ther 9   2016 Journal Article                                                                                                                                                                                                                                                                                                                                                                                                                                                                                                                                                                                               |
| ervk2 | akt1   | <a href="http://www.ncbi.nlm.nih.gov/entrez/query.fcgi?cmd=Retrieve&amp;db=pubmed&amp;dopt=Abstract&amp;list_uids=27578985">http://www.ncbi.nlm.nih.gov/entrez/query.fcgi?cmd=Retrieve&amp;db=pubmed&amp;dopt=Abstract&amp;list_uids=27578985</a>  6 Oncotargets Ther 9   2016 Journal Article                                                                                                                                                                                                                                                                                                                                                                                                                                                                                                                                                                                               |
| ervk2 | pik3ca | <a href="http://www.ncbi.nlm.nih.gov/entrez/query.fcgi?cmd=Retrieve&amp;db=pubmed&amp;dopt=Abstract&amp;list_uids=27578985">http://www.ncbi.nlm.nih.gov/entrez/query.fcgi?cmd=Retrieve&amp;db=pubmed&amp;dopt=Abstract&amp;list_uids=27578985</a>  6 Oncotargets Ther 9   2016 Journal Article                                                                                                                                                                                                                                                                                                                                                                                                                                                                                                                                                                                               |

|       |           |                                                                                                                                                                                                                                                                                                                                                                                                                                                                                                                                                                                       |
|-------|-----------|---------------------------------------------------------------------------------------------------------------------------------------------------------------------------------------------------------------------------------------------------------------------------------------------------------------------------------------------------------------------------------------------------------------------------------------------------------------------------------------------------------------------------------------------------------------------------------------|
| ervk2 | pik3r2    | <a href="http://www.ncbi.nlm.nih.gov/entrez/query.fcgi?cmd=Retrieve&amp;db=pubmed&amp;dopt=Abstract&amp;list_uids=27578985">http://www.ncbi.nlm.nih.gov/entrez/query.fcgi?cmd=Retrieve&amp;db=pubmed&amp;dopt=Abstract&amp;list_uids=27578985</a>  6 Onco Targets Ther 9  2016 Journal Article                                                                                                                                                                                                                                                                                        |
| ervk2 | mirn126   | <a href="http://www.ncbi.nlm.nih.gov/entrez/query.fcgi?cmd=Retrieve&amp;db=pubmed&amp;dopt=Abstract&amp;list_uids=27578985">http://www.ncbi.nlm.nih.gov/entrez/query.fcgi?cmd=Retrieve&amp;db=pubmed&amp;dopt=Abstract&amp;list_uids=27578985</a>  6 Onco Targets Ther 9  2016 Journal Article                                                                                                                                                                                                                                                                                        |
| mapk8 | foxo1     | <a href="http://www.ncbi.nlm.nih.gov/entrez/query.fcgi?cmd=Retrieve&amp;db=pubmed&amp;dopt=Abstract&amp;list_uids=27268017">http://www.ncbi.nlm.nih.gov/entrez/query.fcgi?cmd=Retrieve&amp;db=pubmed&amp;dopt=Abstract&amp;list_uids=27268017</a>  6 BMC Gastroenterol 16 1  2016 Journal Article                                                                                                                                                                                                                                                                                     |
| mapk8 | rela      | <a href="http://www.ncbi.nlm.nih.gov/entrez/query.fcgi?cmd=Retrieve&amp;db=pubmed&amp;dopt=Abstract&amp;list_uids=27393618">http://www.ncbi.nlm.nih.gov/entrez/query.fcgi?cmd=Retrieve&amp;db=pubmed&amp;dopt=Abstract&amp;list_uids=27393618</a>  6 Breast Cancer Res Treat 158 3 Aug 2016 Journal Article                                                                                                                                                                                                                                                                           |
| mapk8 | nf-kappab | <a href="http://www.ncbi.nlm.nih.gov/entrez/query.fcgi?cmd=Retrieve&amp;db=pubmed&amp;dopt=Abstract&amp;list_uids=27393618">http://www.ncbi.nlm.nih.gov/entrez/query.fcgi?cmd=Retrieve&amp;db=pubmed&amp;dopt=Abstract&amp;list_uids=27393618</a>  6 Breast Cancer Res Treat 158 3 Aug 2016 Journal Article                                                                                                                                                                                                                                                                           |
| mapk8 | plau      | <a href="http://www.ncbi.nlm.nih.gov/entrez/query.fcgi?cmd=Retrieve&amp;db=pubmed&amp;dopt=Abstract&amp;list_uids=27527140">http://www.ncbi.nlm.nih.gov/entrez/query.fcgi?cmd=Retrieve&amp;db=pubmed&amp;dopt=Abstract&amp;list_uids=27527140</a>  6 Molecules 21 8  2016 Journal Article                                                                                                                                                                                                                                                                                             |
| mapk8 | mmp9      | <a href="http://www.ncbi.nlm.nih.gov/entrez/query.fcgi?cmd=Retrieve&amp;db=pubmed&amp;dopt=Abstract&amp;list_uids=27527140">http://www.ncbi.nlm.nih.gov/entrez/query.fcgi?cmd=Retrieve&amp;db=pubmed&amp;dopt=Abstract&amp;list_uids=27527140</a>  6 Molecules 21 8  2016 Journal Article  <a href="http://www.ncbi.nlm.nih.gov/entrez/query.fcgi?cmd=Retrieve&amp;db=pubmed&amp;dopt=Abstract&amp;list_uids=27367023">http://www.ncbi.nlm.nih.gov/entrez/query.fcgi?cmd=Retrieve&amp;db=pubmed&amp;dopt=Abstract&amp;list_uids=27367023</a>  6 Oncotarget  Jun 2016 JOURNAL ARTICLE  |
| mapk8 | akt1      | <a href="http://www.ncbi.nlm.nih.gov/entrez/query.fcgi?cmd=Retrieve&amp;db=pubmed&amp;dopt=Abstract&amp;list_uids=27527140">http://www.ncbi.nlm.nih.gov/entrez/query.fcgi?cmd=Retrieve&amp;db=pubmed&amp;dopt=Abstract&amp;list_uids=27527140</a>  6 Molecules 21 8  2016 Journal Article  <a href="http://www.ncbi.nlm.nih.gov/entrez/query.fcgi?cmd=Retrieve&amp;db=pubmed&amp;dopt=Abstract&amp;list_uids=27599909">http://www.ncbi.nlm.nih.gov/entrez/query.fcgi?cmd=Retrieve&amp;db=pubmed&amp;dopt=Abstract&amp;list_uids=27599909</a>  6 Mol Med Rep  Sep 2016 JOURNAL ARTICLE |
| mapk8 | stat3     | <a href="http://www.ncbi.nlm.nih.gov/entrez/query.fcgi?cmd=Retrieve&amp;db=pubmed&amp;dopt=Abstract&amp;list_uids=27599909">http://www.ncbi.nlm.nih.gov/entrez/query.fcgi?cmd=Retrieve&amp;db=pubmed&amp;dopt=Abstract&amp;list_uids=27599909</a>  6 Mol Med Rep  Sep 2016 JOURNAL ARTICLE                                                                                                                                                                                                                                                                                            |
| jun   | foxo1     | <a href="http://www.ncbi.nlm.nih.gov/entrez/query.fcgi?cmd=Retrieve&amp;db=pubmed&amp;dopt=Abstract&amp;list_uids=27268017">http://www.ncbi.nlm.nih.gov/entrez/query.fcgi?cmd=Retrieve&amp;db=pubmed&amp;dopt=Abstract&amp;list_uids=27268017</a>  6 BMC Gastroenterol 16 1  2016 Journal Article                                                                                                                                                                                                                                                                                     |
| jun   | axl       | <a href="http://www.ncbi.nlm.nih.gov/entrez/query.fcgi?cmd=Retrieve&amp;db=pubmed&amp;dopt=Abstract&amp;list_uids=27385093">http://www.ncbi.nlm.nih.gov/entrez/query.fcgi?cmd=Retrieve&amp;db=pubmed&amp;dopt=Abstract&amp;list_uids=27385093</a>  6 Oncotarget  Jul 2016 JOURNAL ARTICLE                                                                                                                                                                                                                                                                                             |
| jun   | atf2      | <a href="http://www.ncbi.nlm.nih.gov/entrez/query.fcgi?cmd=Retrieve&amp;db=pubmed&amp;dopt=Abstract&amp;list_uids=27385093">http://www.ncbi.nlm.nih.gov/entrez/query.fcgi?cmd=Retrieve&amp;db=pubmed&amp;dopt=Abstract&amp;list_uids=27385093</a>  6 Oncotarget  Jul 2016 JOURNAL ARTICLE                                                                                                                                                                                                                                                                                             |
| jun   | pcsk1     | <a href="http://www.ncbi.nlm.nih.gov/entrez/query.fcgi?cmd=Retrieve&amp;db=pubmed&amp;dopt=Abstract&amp;list_uids=27385093">http://www.ncbi.nlm.nih.gov/entrez/query.fcgi?cmd=Retrieve&amp;db=pubmed&amp;dopt=Abstract&amp;list_uids=27385093</a>  6 Oncotarget  Jul 2016 JOURNAL ARTICLE                                                                                                                                                                                                                                                                                             |
| jun   | plau      | <a href="http://www.ncbi.nlm.nih.gov/entrez/query.fcgi?cmd=Retrieve&amp;db=pubmed&amp;dopt=Abstract&amp;list_uids=27385093">http://www.ncbi.nlm.nih.gov/entrez/query.fcgi?cmd=Retrieve&amp;db=pubmed&amp;dopt=Abstract&amp;list_uids=27385093</a>  6 Oncotarget  Jul 2016 JOURNAL ARTICLE                                                                                                                                                                                                                                                                                             |
| jun   | cops5     | <a href="http://www.ncbi.nlm.nih.gov/entrez/query.fcgi?cmd=Retrieve&amp;db=pubmed&amp;dopt=Abstract&amp;list_uids=27412572">http://www.ncbi.nlm.nih.gov/entrez/query.fcgi?cmd=Retrieve&amp;db=pubmed&amp;dopt=Abstract&amp;list_uids=27412572</a>  6 Med Oncol 33 8 Aug 2016 Journal Article,Review                                                                                                                                                                                                                                                                                   |
| jun   | nf1       | <a href="http://www.ncbi.nlm.nih.gov/entrez/query.fcgi?cmd=Retrieve&amp;db=pubmed&amp;dopt=Abstract&amp;list_uids=27494896">http://www.ncbi.nlm.nih.gov/entrez/query.fcgi?cmd=Retrieve&amp;db=pubmed&amp;dopt=Abstract&amp;list_uids=27494896</a>  6 Oncotarget  Aug 2016 JOURNAL ARTICLE                                                                                                                                                                                                                                                                                             |

|        |         |                                                                                                                                                                                                                                                                                                                                                                                                                                                                                                                                                                                                                                                                                                                                                                                                                                                                                            |
|--------|---------|--------------------------------------------------------------------------------------------------------------------------------------------------------------------------------------------------------------------------------------------------------------------------------------------------------------------------------------------------------------------------------------------------------------------------------------------------------------------------------------------------------------------------------------------------------------------------------------------------------------------------------------------------------------------------------------------------------------------------------------------------------------------------------------------------------------------------------------------------------------------------------------------|
| jun    | rhoc    | <a href="http://www.ncbi.nlm.nih.gov/entrez/query.fcgi?cmd=Retrieve&amp;db=pubmed&amp;dopt=Abstract&amp;list_uids=27494896">http://www.ncbi.nlm.nih.gov/entrez/query.fcgi?cmd=Retrieve&amp;db=pubmed&amp;dopt=Abstract&amp;list_uids=27494896</a>  6 Oncotarget  Aug 2016 JOURNAL ARTICLE                                                                                                                                                                                                                                                                                                                                                                                                                                                                                                                                                                                                  |
| jun    | tnfsf13 | <a href="http://www.ncbi.nlm.nih.gov/entrez/query.fcgi?cmd=Retrieve&amp;db=pubmed&amp;dopt=Abstract&amp;list_uids=27529686">http://www.ncbi.nlm.nih.gov/entrez/query.fcgi?cmd=Retrieve&amp;db=pubmed&amp;dopt=Abstract&amp;list_uids=27529686</a>  6 Int J Cancer  Aug 2016 JOURNAL ARTICLE                                                                                                                                                                                                                                                                                                                                                                                                                                                                                                                                                                                                |
| jun    | hgf     | <a href="http://www.ncbi.nlm.nih.gov/entrez/query.fcgi?cmd=Retrieve&amp;db=pubmed&amp;dopt=Abstract&amp;list_uids=27529686">http://www.ncbi.nlm.nih.gov/entrez/query.fcgi?cmd=Retrieve&amp;db=pubmed&amp;dopt=Abstract&amp;list_uids=27529686</a>  6 Int J Cancer  Aug 2016 JOURNAL ARTICLE                                                                                                                                                                                                                                                                                                                                                                                                                                                                                                                                                                                                |
| jun    | slc9a1  | <a href="http://www.ncbi.nlm.nih.gov/entrez/query.fcgi?cmd=Retrieve&amp;db=pubmed&amp;dopt=Abstract&amp;list_uids=27529686">http://www.ncbi.nlm.nih.gov/entrez/query.fcgi?cmd=Retrieve&amp;db=pubmed&amp;dopt=Abstract&amp;list_uids=27529686</a>  6 Int J Cancer  Aug 2016 JOURNAL ARTICLE                                                                                                                                                                                                                                                                                                                                                                                                                                                                                                                                                                                                |
| jun    | mapk8   | <a href="http://www.ncbi.nlm.nih.gov/entrez/query.fcgi?cmd=Retrieve&amp;db=pubmed&amp;dopt=Abstract&amp;list_uids=27392951">http://www.ncbi.nlm.nih.gov/entrez/query.fcgi?cmd=Retrieve&amp;db=pubmed&amp;dopt=Abstract&amp;list_uids=27392951</a>  6 Target Oncol  Jul 2016 JOURNAL ARTICLE  <a href="http://www.ncbi.nlm.nih.gov/entrez/query.fcgi?cmd=Retrieve&amp;db=pubmed&amp;dopt=Abstract&amp;list_uids=27268017">http://www.ncbi.nlm.nih.gov/entrez/query.fcgi?cmd=Retrieve&amp;db=pubmed&amp;dopt=Abstract&amp;list_uids=27268017</a>  6 BMC Gastroenterol 16 1  2016 Journal Article  <a href="http://www.ncbi.nlm.nih.gov/entrez/query.fcgi?cmd=Retrieve&amp;db=pubmed&amp;dopt=Abstract&amp;list_uids=27565324">http://www.ncbi.nlm.nih.gov/entrez/query.fcgi?cmd=Retrieve&amp;db=pubmed&amp;dopt=Abstract&amp;list_uids=27565324</a>  6 Neoplasma  6 Aug 2016 JOURNAL ARTICLE |
| myst2  | suv39h1 | <a href="http://www.ncbi.nlm.nih.gov/entrez/query.fcgi?cmd=Retrieve&amp;db=pubmed&amp;dopt=Abstract&amp;list_uids=27270040">http://www.ncbi.nlm.nih.gov/entrez/query.fcgi?cmd=Retrieve&amp;db=pubmed&amp;dopt=Abstract&amp;list_uids=27270040</a>  6 Dev Cell 37 5 Jun 2016 Journal Article                                                                                                                                                                                                                                                                                                                                                                                                                                                                                                                                                                                                |
| ptpn11 | ifna1   | <a href="http://www.ncbi.nlm.nih.gov/entrez/query.fcgi?cmd=Retrieve&amp;db=pubmed&amp;dopt=Abstract&amp;list_uids=27270128">http://www.ncbi.nlm.nih.gov/entrez/query.fcgi?cmd=Retrieve&amp;db=pubmed&amp;dopt=Abstract&amp;list_uids=27270128</a>  6 Virus Res 222  Aug 2016 Journal Article                                                                                                                                                                                                                                                                                                                                                                                                                                                                                                                                                                                               |
| ptpn11 | ceacam1 | <a href="http://www.ncbi.nlm.nih.gov/entrez/query.fcgi?cmd=Retrieve&amp;db=pubmed&amp;dopt=Abstract&amp;list_uids=27572314">http://www.ncbi.nlm.nih.gov/entrez/query.fcgi?cmd=Retrieve&amp;db=pubmed&amp;dopt=Abstract&amp;list_uids=27572314</a>  6 Oncotarget  Aug 2016 JOURNAL ARTICLE                                                                                                                                                                                                                                                                                                                                                                                                                                                                                                                                                                                                  |
| tspan8 | hcc     | <a href="http://www.ncbi.nlm.nih.gov/entrez/query.fcgi?cmd=Retrieve&amp;db=pubmed&amp;dopt=Abstract&amp;list_uids=27339400">http://www.ncbi.nlm.nih.gov/entrez/query.fcgi?cmd=Retrieve&amp;db=pubmed&amp;dopt=Abstract&amp;list_uids=27339400</a>  6 FEBS Lett 590 16 Aug 2016 Letter  <a href="http://www.ncbi.nlm.nih.gov/entrez/query.fcgi?cmd=Retrieve&amp;db=pubmed&amp;dopt=Abstract&amp;list_uids=27270327">http://www.ncbi.nlm.nih.gov/entrez/query.fcgi?cmd=Retrieve&amp;db=pubmed&amp;dopt=Abstract&amp;list_uids=27270327</a>  6 Oncotarget  Jun 2016 JOURNAL ARTICLE                                                                                                                                                                                                                                                                                                           |
| tp53   | chek1   | <a href="http://www.ncbi.nlm.nih.gov/entrez/query.fcgi?cmd=Retrieve&amp;db=pubmed&amp;dopt=Abstract&amp;list_uids=27279256">http://www.ncbi.nlm.nih.gov/entrez/query.fcgi?cmd=Retrieve&amp;db=pubmed&amp;dopt=Abstract&amp;list_uids=27279256</a>  6 Int J Oncol 49 2 Aug 2016 Journal Article                                                                                                                                                                                                                                                                                                                                                                                                                                                                                                                                                                                             |
| tp53   | sparc   | <a href="http://www.ncbi.nlm.nih.gov/entrez/query.fcgi?cmd=Retrieve&amp;db=pubmed&amp;dopt=Abstract&amp;list_uids=27318148">http://www.ncbi.nlm.nih.gov/entrez/query.fcgi?cmd=Retrieve&amp;db=pubmed&amp;dopt=Abstract&amp;list_uids=27318148</a>  6 Gastroenterology 151 3 Sep 2016 Journal Article                                                                                                                                                                                                                                                                                                                                                                                                                                                                                                                                                                                       |
| tp53   | prkch   | <a href="http://www.ncbi.nlm.nih.gov/entrez/query.fcgi?cmd=Retrieve&amp;db=pubmed&amp;dopt=Abstract&amp;list_uids=27351203">http://www.ncbi.nlm.nih.gov/entrez/query.fcgi?cmd=Retrieve&amp;db=pubmed&amp;dopt=Abstract&amp;list_uids=27351203</a>  6 PLoS One 11 6  2016 Journal Article                                                                                                                                                                                                                                                                                                                                                                                                                                                                                                                                                                                                   |
| tp53   | s100a4  | <a href="http://www.ncbi.nlm.nih.gov/entrez/query.fcgi?cmd=Retrieve&amp;db=pubmed&amp;dopt=Abstract&amp;list_uids=27382312">http://www.ncbi.nlm.nih.gov/entrez/query.fcgi?cmd=Retrieve&amp;db=pubmed&amp;dopt=Abstract&amp;list_uids=27382312</a>  6 Oncotargets Ther 9   2016 Journal Article                                                                                                                                                                                                                                                                                                                                                                                                                                                                                                                                                                                             |
| tp53   | bax     | <a href="http://www.ncbi.nlm.nih.gov/entrez/query.fcgi?cmd=Retrieve&amp;db=pubmed&amp;dopt=Abstract&amp;list_uids=27421660">http://www.ncbi.nlm.nih.gov/entrez/query.fcgi?cmd=Retrieve&amp;db=pubmed&amp;dopt=Abstract&amp;list_uids=27421660</a>  6 Acta Biochim Biophys Sin (Shanghai) 48 8 Aug 2016 Journal Article                                                                                                                                                                                                                                                                                                                                                                                                                                                                                                                                                                     |
| tp53   | bcl2l1  | <a href="http://www.ncbi.nlm.nih.gov/entrez/query.fcgi?cmd=Retrieve&amp;db=pubmed&amp;dopt=Abstract&amp;list_uids=27421660">http://www.ncbi.nlm.nih.gov/entrez/query.fcgi?cmd=Retrieve&amp;db=pubmed&amp;dopt=Abstract&amp;list_uids=27421660</a>  6 Acta Biochim Biophys Sin (Shanghai) 48 8 Aug 2016 Journal Article                                                                                                                                                                                                                                                                                                                                                                                                                                                                                                                                                                     |
| tp53   | bcl2    | <a href="http://www.ncbi.nlm.nih.gov/entrez/query.fcgi?cmd=Retrieve&amp;db=pubmed&amp;dopt=Abstract&amp;list_uids=27421660">http://www.ncbi.nlm.nih.gov/entrez/query.fcgi?cmd=Retrieve&amp;db=pubmed&amp;dopt=Abstract&amp;list_uids=27421660</a>  6 Acta                                                                                                                                                                                                                                                                                                                                                                                                                                                                                                                                                                                                                                  |

|         |           |                                                                                                                                                                                                                                                                                                                                                                                                                                                                                                                                                                                                                 |
|---------|-----------|-----------------------------------------------------------------------------------------------------------------------------------------------------------------------------------------------------------------------------------------------------------------------------------------------------------------------------------------------------------------------------------------------------------------------------------------------------------------------------------------------------------------------------------------------------------------------------------------------------------------|
|         |           | Biochim Biophys Sin (Shanghai) 48 8 Aug 2016 Journal Article                                                                                                                                                                                                                                                                                                                                                                                                                                                                                                                                                    |
| tp53    | cdkn1a    | <a href="http://www.ncbi.nlm.nih.gov/entrez/query.fcgi?cmd=Retrieve&amp;db=pubmed&amp;dopt=Abstract&amp;list_uids=27421660">http://www.ncbi.nlm.nih.gov/entrez/query.fcgi?cmd=Retrieve&amp;db=pubmed&amp;dopt=Abstract&amp;list_uids=27421660</a>  6 Acta Biochim Biophys Sin (Shanghai) 48 8 Aug 2016 Journal Article  <a href="http://www.ncbi.nlm.nih.gov/entrez/query.fcgi?cmd=Retrieve&amp;db=pubmed&amp;dopt=Abstract&amp;list_uids=27351203">http://www.ncbi.nlm.nih.gov/entrez/query.fcgi?cmd=Retrieve&amp;db=pubmed&amp;dopt=Abstract&amp;list_uids=27351203</a>  6 PLoS One 11 6 2016 Journal Article |
| tp53    | ervk2     | <a href="http://www.ncbi.nlm.nih.gov/entrez/query.fcgi?cmd=Retrieve&amp;db=pubmed&amp;dopt=Abstract&amp;list_uids=27557521">http://www.ncbi.nlm.nih.gov/entrez/query.fcgi?cmd=Retrieve&amp;db=pubmed&amp;dopt=Abstract&amp;list_uids=27557521</a>  6 Oncotarget  Aug 2016 JOURNAL ARTICLE                                                                                                                                                                                                                                                                                                                       |
| jmjd1a  | tp53      | <a href="http://www.ncbi.nlm.nih.gov/entrez/query.fcgi?cmd=Retrieve&amp;db=pubmed&amp;dopt=Abstract&amp;list_uids=27270439">http://www.ncbi.nlm.nih.gov/entrez/query.fcgi?cmd=Retrieve&amp;db=pubmed&amp;dopt=Abstract&amp;list_uids=27270439</a>  6 Oncogene  Jun 2016 JOURNAL ARTICLE                                                                                                                                                                                                                                                                                                                         |
| prmt5   | wdr5      | <a href="http://www.ncbi.nlm.nih.gov/entrez/query.fcgi?cmd=Retrieve&amp;db=pubmed&amp;dopt=Abstract&amp;list_uids=27270440">http://www.ncbi.nlm.nih.gov/entrez/query.fcgi?cmd=Retrieve&amp;db=pubmed&amp;dopt=Abstract&amp;list_uids=27270440</a>  6 Oncogene  Jun 2016 JOURNAL ARTICLE                                                                                                                                                                                                                                                                                                                         |
| prmt5   | wdr77     | <a href="http://www.ncbi.nlm.nih.gov/entrez/query.fcgi?cmd=Retrieve&amp;db=pubmed&amp;dopt=Abstract&amp;list_uids=27270440">http://www.ncbi.nlm.nih.gov/entrez/query.fcgi?cmd=Retrieve&amp;db=pubmed&amp;dopt=Abstract&amp;list_uids=27270440</a>  6 Oncogene  Jun 2016 JOURNAL ARTICLE                                                                                                                                                                                                                                                                                                                         |
| map3k14 | mmp14     | <a href="http://www.ncbi.nlm.nih.gov/entrez/query.fcgi?cmd=Retrieve&amp;db=pubmed&amp;dopt=Abstract&amp;list_uids=27270613">http://www.ncbi.nlm.nih.gov/entrez/query.fcgi?cmd=Retrieve&amp;db=pubmed&amp;dopt=Abstract&amp;list_uids=27270613</a>  6 Oncogene 5 6 2016 Journal Article                                                                                                                                                                                                                                                                                                                          |
| mirn373 | stat3     | <a href="http://www.ncbi.nlm.nih.gov/entrez/query.fcgi?cmd=Retrieve&amp;db=pubmed&amp;dopt=Abstract&amp;list_uids=27271572">http://www.ncbi.nlm.nih.gov/entrez/query.fcgi?cmd=Retrieve&amp;db=pubmed&amp;dopt=Abstract&amp;list_uids=27271572</a>  6 PLoS One 11 6 2016 Journal Article                                                                                                                                                                                                                                                                                                                         |
| enox2   | pou3f2    | <a href="http://www.ncbi.nlm.nih.gov/entrez/query.fcgi?cmd=Retrieve&amp;db=pubmed&amp;dopt=Abstract&amp;list_uids=27271588">http://www.ncbi.nlm.nih.gov/entrez/query.fcgi?cmd=Retrieve&amp;db=pubmed&amp;dopt=Abstract&amp;list_uids=27271588</a>  6 Molecules 21 6 2016 Journal Article                                                                                                                                                                                                                                                                                                                        |
| cldn7   | zeb1      | <a href="http://www.ncbi.nlm.nih.gov/entrez/query.fcgi?cmd=Retrieve&amp;db=pubmed&amp;dopt=Abstract&amp;list_uids=27286256">http://www.ncbi.nlm.nih.gov/entrez/query.fcgi?cmd=Retrieve&amp;db=pubmed&amp;dopt=Abstract&amp;list_uids=27286256</a>  6 Oncotarget  Jun 2016 JOURNAL ARTICLE                                                                                                                                                                                                                                                                                                                       |
| cldn7   | tjp1      | <a href="http://www.ncbi.nlm.nih.gov/entrez/query.fcgi?cmd=Retrieve&amp;db=pubmed&amp;dopt=Abstract&amp;list_uids=27286256">http://www.ncbi.nlm.nih.gov/entrez/query.fcgi?cmd=Retrieve&amp;db=pubmed&amp;dopt=Abstract&amp;list_uids=27286256</a>  6 Oncotarget  Jun 2016 JOURNAL ARTICLE                                                                                                                                                                                                                                                                                                                       |
| msi2    | cldn7     | <a href="http://www.ncbi.nlm.nih.gov/entrez/query.fcgi?cmd=Retrieve&amp;db=pubmed&amp;dopt=Abstract&amp;list_uids=27274057">http://www.ncbi.nlm.nih.gov/entrez/query.fcgi?cmd=Retrieve&amp;db=pubmed&amp;dopt=Abstract&amp;list_uids=27274057</a>  6 Proc Natl Acad Sci U S A 113 25 Jun 2016 Journal Article                                                                                                                                                                                                                                                                                                   |
| msi2    | klf4      | <a href="http://www.ncbi.nlm.nih.gov/entrez/query.fcgi?cmd=Retrieve&amp;db=pubmed&amp;dopt=Abstract&amp;list_uids=27449499">http://www.ncbi.nlm.nih.gov/entrez/query.fcgi?cmd=Retrieve&amp;db=pubmed&amp;dopt=Abstract&amp;list_uids=27449499</a>  6 Clin Cancer Res  Jul 2016 JOURNAL ARTICLE                                                                                                                                                                                                                                                                                                                  |
| mapk14  | nf-kappab | <a href="http://www.ncbi.nlm.nih.gov/entrez/query.fcgi?cmd=Retrieve&amp;db=pubmed&amp;dopt=Abstract&amp;list_uids=27393618">http://www.ncbi.nlm.nih.gov/entrez/query.fcgi?cmd=Retrieve&amp;db=pubmed&amp;dopt=Abstract&amp;list_uids=27393618</a>  6 Breast Cancer Res Treat 158 3 Aug 2016 Journal Article                                                                                                                                                                                                                                                                                                     |
| mapk14  | pik3ca    | <a href="http://www.ncbi.nlm.nih.gov/entrez/query.fcgi?cmd=Retrieve&amp;db=pubmed&amp;dopt=Abstract&amp;list_uids=27394418">http://www.ncbi.nlm.nih.gov/entrez/query.fcgi?cmd=Retrieve&amp;db=pubmed&amp;dopt=Abstract&amp;list_uids=27394418</a>  6 Neurochem Res  Jul 2016 JOURNAL ARTICLE                                                                                                                                                                                                                                                                                                                    |
| mapk14  | snord87   | <a href="http://www.ncbi.nlm.nih.gov/entrez/query.fcgi?cmd=Retrieve&amp;db=pubmed&amp;dopt=Abstract&amp;list_uids=27394418">http://www.ncbi.nlm.nih.gov/entrez/query.fcgi?cmd=Retrieve&amp;db=pubmed&amp;dopt=Abstract&amp;list_uids=27394418</a>  6 Neurochem Res  Jul 2016 JOURNAL ARTICLE                                                                                                                                                                                                                                                                                                                    |
| mapk14  | itk       | <a href="http://www.ncbi.nlm.nih.gov/entrez/query.fcgi?cmd=Retrieve&amp;db=pubmed&amp;dopt=Abstract&amp;list_uids=27507215">http://www.ncbi.nlm.nih.gov/entrez/query.fcgi?cmd=Retrieve&amp;db=pubmed&amp;dopt=Abstract&amp;list_uids=27507215</a>  6 Biochem Biophys Res Commun 478 2 Sep 2016 Journal Article                                                                                                                                                                                                                                                                                                  |

|         |        |                                                                                                                                                                                                                                                                                                                                                                                                                                                                                                                                                                                                                                                                                                                                                                                                                                                                                                                                                                                                                                                                                                                                                                                                                                                                                                                                                                                                                                                                                                    |
|---------|--------|----------------------------------------------------------------------------------------------------------------------------------------------------------------------------------------------------------------------------------------------------------------------------------------------------------------------------------------------------------------------------------------------------------------------------------------------------------------------------------------------------------------------------------------------------------------------------------------------------------------------------------------------------------------------------------------------------------------------------------------------------------------------------------------------------------------------------------------------------------------------------------------------------------------------------------------------------------------------------------------------------------------------------------------------------------------------------------------------------------------------------------------------------------------------------------------------------------------------------------------------------------------------------------------------------------------------------------------------------------------------------------------------------------------------------------------------------------------------------------------------------|
| mapk14  | akt1   | <a href="http://www.ncbi.nlm.nih.gov/entrez/query.fcgi?cmd=Retrieve&amp;db=pubmed&amp;dopt=Abstract&amp;list_uids=27394418">http://www.ncbi.nlm.nih.gov/entrez/query.fcgi?cmd=Retrieve&amp;db=pubmed&amp;dopt=Abstract&amp;list_uids=27394418</a>  6 Neurochem Res  Jul 2016 JOURNAL ARTICLE  <a href="http://www.ncbi.nlm.nih.gov/entrez/query.fcgi?cmd=Retrieve&amp;db=pubmed&amp;dopt=Abstract&amp;list_uids=27507215">http://www.ncbi.nlm.nih.gov/entrez/query.fcgi?cmd=Retrieve&amp;db=pubmed&amp;dopt=Abstract&amp;list_uids=27507215</a>  6 Biochem Biophys Res Commun 478 2 Sep 2016 Journal Article                                                                                                                                                                                                                                                                                                                                                                                                                                                                                                                                                                                                                                                                                                                                                                                                                                                                                       |
| mapk14  | macc1  | <a href="http://www.ncbi.nlm.nih.gov/entrez/query.fcgi?cmd=Retrieve&amp;db=pubmed&amp;dopt=Abstract&amp;list_uids=27529686">http://www.ncbi.nlm.nih.gov/entrez/query.fcgi?cmd=Retrieve&amp;db=pubmed&amp;dopt=Abstract&amp;list_uids=27529686</a>  6 Int J Cancer  Aug 2016 JOURNAL ARTICLE                                                                                                                                                                                                                                                                                                                                                                                                                                                                                                                                                                                                                                                                                                                                                                                                                                                                                                                                                                                                                                                                                                                                                                                                        |
| mapk14  | mapk8  | <a href="http://www.ncbi.nlm.nih.gov/entrez/query.fcgi?cmd=Retrieve&amp;db=pubmed&amp;dopt=Abstract&amp;list_uids=27519288">http://www.ncbi.nlm.nih.gov/entrez/query.fcgi?cmd=Retrieve&amp;db=pubmed&amp;dopt=Abstract&amp;list_uids=27519288</a>  6 Toxicology 366-367  Aug 2016 JOURNAL ARTICLE  <a href="http://www.ncbi.nlm.nih.gov/entrez/query.fcgi?cmd=Retrieve&amp;db=pubmed&amp;dopt=Abstract&amp;list_uids=27366113">http://www.ncbi.nlm.nih.gov/entrez/query.fcgi?cmd=Retrieve&amp;db=pubmed&amp;dopt=Abstract&amp;list_uids=27366113</a>  6 Cancer Cell Int 16  2016 Journal Article  <a href="http://www.ncbi.nlm.nih.gov/entrez/query.fcgi?cmd=Retrieve&amp;db=pubmed&amp;dopt=Abstract&amp;list_uids=27565324">http://www.ncbi.nlm.nih.gov/entrez/query.fcgi?cmd=Retrieve&amp;db=pubmed&amp;dopt=Abstract&amp;list_uids=27565324</a>  6 Neoplasma  6 Aug 2016 JOURNAL ARTICLE  <a href="http://www.ncbi.nlm.nih.gov/entrez/query.fcgi?cmd=Retrieve&amp;db=pubmed&amp;dopt=Abstract&amp;list_uids=27393618">http://www.ncbi.nlm.nih.gov/entrez/query.fcgi?cmd=Retrieve&amp;db=pubmed&amp;dopt=Abstract&amp;list_uids=27393618</a>  6 Breast Cancer Res Treat 158 3 Aug 2016 Journal Article                                                                                                                                                                                                                                                                                          |
| mapk14  | jun    | <a href="http://www.ncbi.nlm.nih.gov/entrez/query.fcgi?cmd=Retrieve&amp;db=pubmed&amp;dopt=Abstract&amp;list_uids=27565324">http://www.ncbi.nlm.nih.gov/entrez/query.fcgi?cmd=Retrieve&amp;db=pubmed&amp;dopt=Abstract&amp;list_uids=27565324</a>  6 Neoplasma  6 Aug 2016 JOURNAL ARTICLE                                                                                                                                                                                                                                                                                                                                                                                                                                                                                                                                                                                                                                                                                                                                                                                                                                                                                                                                                                                                                                                                                                                                                                                                         |
| mapk14  | mapk3  | <a href="http://www.ncbi.nlm.nih.gov/entrez/query.fcgi?cmd=Retrieve&amp;db=pubmed&amp;dopt=Abstract&amp;list_uids=27366113">http://www.ncbi.nlm.nih.gov/entrez/query.fcgi?cmd=Retrieve&amp;db=pubmed&amp;dopt=Abstract&amp;list_uids=27366113</a>  6 Cancer Cell Int 16  2016 Journal Article  <a href="http://www.ncbi.nlm.nih.gov/entrez/query.fcgi?cmd=Retrieve&amp;db=pubmed&amp;dopt=Abstract&amp;list_uids=27565324">http://www.ncbi.nlm.nih.gov/entrez/query.fcgi?cmd=Retrieve&amp;db=pubmed&amp;dopt=Abstract&amp;list_uids=27565324</a>  6 Neoplasma  6 Aug 2016 JOURNAL ARTICLE  <a href="http://www.ncbi.nlm.nih.gov/entrez/query.fcgi?cmd=Retrieve&amp;db=pubmed&amp;dopt=Abstract&amp;list_uids=27393618">http://www.ncbi.nlm.nih.gov/entrez/query.fcgi?cmd=Retrieve&amp;db=pubmed&amp;dopt=Abstract&amp;list_uids=27393618</a>  6 Breast Cancer Res Treat 158 3 Aug 2016 Journal Article  <a href="http://www.ncbi.nlm.nih.gov/entrez/query.fcgi?cmd=Retrieve&amp;db=pubmed&amp;dopt=Abstract&amp;list_uids=27588409">http://www.ncbi.nlm.nih.gov/entrez/query.fcgi?cmd=Retrieve&amp;db=pubmed&amp;dopt=Abstract&amp;list_uids=27588409</a>  6 Oncotarget  Aug 2016 JOURNAL ARTICLE  <a href="http://www.ncbi.nlm.nih.gov/entrez/query.fcgi?cmd=Retrieve&amp;db=pubmed&amp;dopt=Abstract&amp;list_uids=27476935">http://www.ncbi.nlm.nih.gov/entrez/query.fcgi?cmd=Retrieve&amp;db=pubmed&amp;dopt=Abstract&amp;list_uids=27476935</a>  6 Biol Pharm Bull 39 8  2016 Journal Article |
| mirn375 | fzd8   | <a href="http://www.ncbi.nlm.nih.gov/entrez/query.fcgi?cmd=Retrieve&amp;db=pubmed&amp;dopt=Abstract&amp;list_uids=27276676">http://www.ncbi.nlm.nih.gov/entrez/query.fcgi?cmd=Retrieve&amp;db=pubmed&amp;dopt=Abstract&amp;list_uids=27276676</a>  6 Oncotarget  Jun 2016 JOURNAL ARTICLE                                                                                                                                                                                                                                                                                                                                                                                                                                                                                                                                                                                                                                                                                                                                                                                                                                                                                                                                                                                                                                                                                                                                                                                                          |
| eif2c2  | eif4e  | <a href="http://www.ncbi.nlm.nih.gov/entrez/query.fcgi?cmd=Retrieve&amp;db=pubmed&amp;dopt=Abstract&amp;list_uids=27276678">http://www.ncbi.nlm.nih.gov/entrez/query.fcgi?cmd=Retrieve&amp;db=pubmed&amp;dopt=Abstract&amp;list_uids=27276678</a>  6 Oncotarget  Jun 2016 JOURNAL ARTICLE                                                                                                                                                                                                                                                                                                                                                                                                                                                                                                                                                                                                                                                                                                                                                                                                                                                                                                                                                                                                                                                                                                                                                                                                          |
| uts2r   | eif4e  | <a href="http://www.ncbi.nlm.nih.gov/entrez/query.fcgi?cmd=Retrieve&amp;db=pubmed&amp;dopt=Abstract&amp;list_uids=27276678">http://www.ncbi.nlm.nih.gov/entrez/query.fcgi?cmd=Retrieve&amp;db=pubmed&amp;dopt=Abstract&amp;list_uids=27276678</a>  6 Oncotarget  Jun 2016 JOURNAL ARTICLE                                                                                                                                                                                                                                                                                                                                                                                                                                                                                                                                                                                                                                                                                                                                                                                                                                                                                                                                                                                                                                                                                                                                                                                                          |
| uts2r   | eif2c2 | <a href="http://www.ncbi.nlm.nih.gov/entrez/query.fcgi?cmd=Retrieve&amp;db=pubmed&amp;dopt=Abstract&amp;list_uids=27276678">http://www.ncbi.nlm.nih.gov/entrez/query.fcgi?cmd=Retrieve&amp;db=pubmed&amp;dopt=Abstract&amp;list_uids=27276678</a>  6 Oncotarget  Jun 2016 JOURNAL ARTICLE                                                                                                                                                                                                                                                                                                                                                                                                                                                                                                                                                                                                                                                                                                                                                                                                                                                                                                                                                                                                                                                                                                                                                                                                          |
| uts2r   | pdcd4  | <a href="http://www.ncbi.nlm.nih.gov/entrez/query.fcgi?cmd=Retrieve&amp;db=pubmed&amp;dopt=Abstract&amp;list_uids=27279541">http://www.ncbi.nlm.nih.gov/entrez/query.fcgi?cmd=Retrieve&amp;db=pubmed&amp;dopt=Abstract&amp;list_uids=27279541</a>  6 Sci Rep 6  2016 Journal Article                                                                                                                                                                                                                                                                                                                                                                                                                                                                                                                                                                                                                                                                                                                                                                                                                                                                                                                                                                                                                                                                                                                                                                                                               |

|        |         |                                                                                                                                                                                                                                                                                                       |
|--------|---------|-------------------------------------------------------------------------------------------------------------------------------------------------------------------------------------------------------------------------------------------------------------------------------------------------------|
| uts2r  | fut4    | <a href="http://www.ncbi.nlm.nih.gov/entrez/query.fcgi?cmd=Retrieve&amp;db=pubmed&amp;dopt=Abstract&amp;list_uids=27375041">http://www.ncbi.nlm.nih.gov/entrez/query.fcgi?cmd=Retrieve&amp;db=pubmed&amp;dopt=Abstract&amp;list_uids=27375041</a>  6 Oncol Rep 36 2 Aug 2016 Journal Article          |
| uts2r  | nostrin | <a href="http://www.ncbi.nlm.nih.gov/entrez/query.fcgi?cmd=Retrieve&amp;db=pubmed&amp;dopt=Abstract&amp;list_uids=27401251">http://www.ncbi.nlm.nih.gov/entrez/query.fcgi?cmd=Retrieve&amp;db=pubmed&amp;dopt=Abstract&amp;list_uids=27401251</a>  6 Clin Cancer Res   Jul 2016 JOURNAL ARTICLE       |
| uts2r  | sfrp1   | <a href="http://www.ncbi.nlm.nih.gov/entrez/query.fcgi?cmd=Retrieve&amp;db=pubmed&amp;dopt=Abstract&amp;list_uids=27459115">http://www.ncbi.nlm.nih.gov/entrez/query.fcgi?cmd=Retrieve&amp;db=pubmed&amp;dopt=Abstract&amp;list_uids=27459115</a>  6 Biomed Pharmacother 83  Jul 2016 JOURNAL ARTICLE |
| uts2r  | nrn1    | <a href="http://www.ncbi.nlm.nih.gov/entrez/query.fcgi?cmd=Retrieve&amp;db=pubmed&amp;dopt=Abstract&amp;list_uids=27471565">http://www.ncbi.nlm.nih.gov/entrez/query.fcgi?cmd=Retrieve&amp;db=pubmed&amp;dopt=Abstract&amp;list_uids=27471565</a>  6 J Cancer 7 11  2016 Journal Article              |
| pdc4   | rela    | <a href="http://www.ncbi.nlm.nih.gov/entrez/query.fcgi?cmd=Retrieve&amp;db=pubmed&amp;dopt=Abstract&amp;list_uids=27533779">http://www.ncbi.nlm.nih.gov/entrez/query.fcgi?cmd=Retrieve&amp;db=pubmed&amp;dopt=Abstract&amp;list_uids=27533779</a>  6 Mol Carcinog   Aug 2016 JOURNAL ARTICLE          |
| pdc4   | eif2ak3 | <a href="http://www.ncbi.nlm.nih.gov/entrez/query.fcgi?cmd=Retrieve&amp;db=pubmed&amp;dopt=Abstract&amp;list_uids=27533779">http://www.ncbi.nlm.nih.gov/entrez/query.fcgi?cmd=Retrieve&amp;db=pubmed&amp;dopt=Abstract&amp;list_uids=27533779</a>  6 Mol Carcinog   Aug 2016 JOURNAL ARTICLE          |
| pdc4   | ephb2   | <a href="http://www.ncbi.nlm.nih.gov/entrez/query.fcgi?cmd=Retrieve&amp;db=pubmed&amp;dopt=Abstract&amp;list_uids=27533779">http://www.ncbi.nlm.nih.gov/entrez/query.fcgi?cmd=Retrieve&amp;db=pubmed&amp;dopt=Abstract&amp;list_uids=27533779</a>  6 Mol Carcinog   Aug 2016 JOURNAL ARTICLE          |
| pdc4   | pten    | <a href="http://www.ncbi.nlm.nih.gov/entrez/query.fcgi?cmd=Retrieve&amp;db=pubmed&amp;dopt=Abstract&amp;list_uids=27533779">http://www.ncbi.nlm.nih.gov/entrez/query.fcgi?cmd=Retrieve&amp;db=pubmed&amp;dopt=Abstract&amp;list_uids=27533779</a>  6 Mol Carcinog   Aug 2016 JOURNAL ARTICLE          |
| pdc4   | bcl2    | <a href="http://www.ncbi.nlm.nih.gov/entrez/query.fcgi?cmd=Retrieve&amp;db=pubmed&amp;dopt=Abstract&amp;list_uids=27600360">http://www.ncbi.nlm.nih.gov/entrez/query.fcgi?cmd=Retrieve&amp;db=pubmed&amp;dopt=Abstract&amp;list_uids=27600360</a>  6 Cell Biol Int   Sep 2016 JOURNAL ARTICLE         |
| pdc4   | bax     | <a href="http://www.ncbi.nlm.nih.gov/entrez/query.fcgi?cmd=Retrieve&amp;db=pubmed&amp;dopt=Abstract&amp;list_uids=27600360">http://www.ncbi.nlm.nih.gov/entrez/query.fcgi?cmd=Retrieve&amp;db=pubmed&amp;dopt=Abstract&amp;list_uids=27600360</a>  6 Cell Biol Int   Sep 2016 JOURNAL ARTICLE         |
| hotair | pdc4    | <a href="http://www.ncbi.nlm.nih.gov/entrez/query.fcgi?cmd=Retrieve&amp;db=pubmed&amp;dopt=Abstract&amp;list_uids=27277755">http://www.ncbi.nlm.nih.gov/entrez/query.fcgi?cmd=Retrieve&amp;db=pubmed&amp;dopt=Abstract&amp;list_uids=27277755</a>  6 Int J Oncol 49 2 Aug 2016 Journal Article        |
| hotair | aof2    | <a href="http://www.ncbi.nlm.nih.gov/entrez/query.fcgi?cmd=Retrieve&amp;db=pubmed&amp;dopt=Abstract&amp;list_uids=27277755">http://www.ncbi.nlm.nih.gov/entrez/query.fcgi?cmd=Retrieve&amp;db=pubmed&amp;dopt=Abstract&amp;list_uids=27277755</a>  6 Int J Oncol 49 2 Aug 2016 Journal Article        |
| hotair | ezh2    | <a href="http://www.ncbi.nlm.nih.gov/entrez/query.fcgi?cmd=Retrieve&amp;db=pubmed&amp;dopt=Abstract&amp;list_uids=27277755">http://www.ncbi.nlm.nih.gov/entrez/query.fcgi?cmd=Retrieve&amp;db=pubmed&amp;dopt=Abstract&amp;list_uids=27277755</a>  6 Int J Oncol 49 2 Aug 2016 Journal Article        |
| hotair | hla-g   | <a href="http://www.ncbi.nlm.nih.gov/entrez/query.fcgi?cmd=Retrieve&amp;db=pubmed&amp;dopt=Abstract&amp;list_uids=27574106">http://www.ncbi.nlm.nih.gov/entrez/query.fcgi?cmd=Retrieve&amp;db=pubmed&amp;dopt=Abstract&amp;list_uids=27574106</a>  6 Int J Oncol 49 3 Sep 2016 Journal Article        |
| aof2   | pdc4    | <a href="http://www.ncbi.nlm.nih.gov/entrez/query.fcgi?cmd=Retrieve&amp;db=pubmed&amp;dopt=Abstract&amp;list_uids=27277755">http://www.ncbi.nlm.nih.gov/entrez/query.fcgi?cmd=Retrieve&amp;db=pubmed&amp;dopt=Abstract&amp;list_uids=27277755</a>  6 Int J Oncol 49 2 Aug 2016 Journal Article        |
| aof2   | itk     | <a href="http://www.ncbi.nlm.nih.gov/entrez/query.fcgi?cmd=Retrieve&amp;db=pubmed&amp;dopt=Abstract&amp;list_uids=27292636">http://www.ncbi.nlm.nih.gov/entrez/query.fcgi?cmd=Retrieve&amp;db=pubmed&amp;dopt=Abstract&amp;list_uids=27292636</a>  6 Cell Rep 15 12 Jun 2016 Journal Article          |
| ezh2   | pdc4    | <a href="http://www.ncbi.nlm.nih.gov/entrez/query.fcgi?cmd=Retrieve&amp;db=pubmed&amp;dopt=Abstract&amp;list_uids=27277755">http://www.ncbi.nlm.nih.gov/entrez/query.fcgi?cmd=Retrieve&amp;db=pubmed&amp;dopt=Abstract&amp;list_uids=27277755</a>  6 Int J Oncol 49 2 Aug 2016 Journal Article        |
| ezh2   | aof2    | <a href="http://www.ncbi.nlm.nih.gov/entrez/query.fcgi?cmd=Retrieve&amp;db=pubmed&amp;dopt=Abstract&amp;list_uids=27277755">http://www.ncbi.nlm.nih.gov/entrez/query.fcgi?cmd=Retrieve&amp;db=pubmed&amp;dopt=Abstract&amp;list_uids=27277755</a>  6 Int J Oncol 49 2 Aug 2016 Journal Article        |



|      |        |                                                                                                                                                                                                                                                                                                                                                                                                                                                                                                                                                                                               |
|------|--------|-----------------------------------------------------------------------------------------------------------------------------------------------------------------------------------------------------------------------------------------------------------------------------------------------------------------------------------------------------------------------------------------------------------------------------------------------------------------------------------------------------------------------------------------------------------------------------------------------|
| ezh2 | foxm1  | <a href="http://www.ncbi.nlm.nih.gov/entrez/query.fcgi?cmd=Retrieve&amp;db=pubmed&amp;dopt=Abstract&amp;list_uids=27303043">http://www.ncbi.nlm.nih.gov/entrez/query.fcgi?cmd=Retrieve&amp;db=pubmed&amp;dopt=Abstract&amp;list_uids=27303043</a>  6 Proc Natl Acad Sci U S A 113 26 Jun 2016 Journal Article                                                                                                                                                                                                                                                                                 |
| ezh2 | tam    | <a href="http://www.ncbi.nlm.nih.gov/entrez/query.fcgi?cmd=Retrieve&amp;db=pubmed&amp;dopt=Abstract&amp;list_uids=27436059">http://www.ncbi.nlm.nih.gov/entrez/query.fcgi?cmd=Retrieve&amp;db=pubmed&amp;dopt=Abstract&amp;list_uids=27436059</a>  6 Cell Biol Int  Jul 2016 JOURNAL ARTICLE                                                                                                                                                                                                                                                                                                  |
| ezh2 | akr1b1 | <a href="http://www.ncbi.nlm.nih.gov/entrez/query.fcgi?cmd=Retrieve&amp;db=pubmed&amp;dopt=Abstract&amp;list_uids=27436059">http://www.ncbi.nlm.nih.gov/entrez/query.fcgi?cmd=Retrieve&amp;db=pubmed&amp;dopt=Abstract&amp;list_uids=27436059</a>  6 Cell Biol Int  Jul 2016 JOURNAL ARTICLE                                                                                                                                                                                                                                                                                                  |
| art1 | itk    | <a href="http://www.ncbi.nlm.nih.gov/entrez/query.fcgi?cmd=Retrieve&amp;db=pubmed&amp;dopt=Abstract&amp;list_uids=27277835">http://www.ncbi.nlm.nih.gov/entrez/query.fcgi?cmd=Retrieve&amp;db=pubmed&amp;dopt=Abstract&amp;list_uids=27277835</a>  6 Int J Oncol 49 2 Aug 2016 Journal Article                                                                                                                                                                                                                                                                                                |
| rhoa | akt1   | <a href="http://www.ncbi.nlm.nih.gov/entrez/query.fcgi?cmd=Retrieve&amp;db=pubmed&amp;dopt=Abstract&amp;list_uids=27277835">http://www.ncbi.nlm.nih.gov/entrez/query.fcgi?cmd=Retrieve&amp;db=pubmed&amp;dopt=Abstract&amp;list_uids=27277835</a>  6 Int J Oncol 49 2 Aug 2016 Journal Article                                                                                                                                                                                                                                                                                                |
| rhoa | cdc42  | <a href="http://www.ncbi.nlm.nih.gov/entrez/query.fcgi?cmd=Retrieve&amp;db=pubmed&amp;dopt=Abstract&amp;list_uids=27340868">http://www.ncbi.nlm.nih.gov/entrez/query.fcgi?cmd=Retrieve&amp;db=pubmed&amp;dopt=Abstract&amp;list_uids=27340868</a>  6 Oncotarget  Jun 2016 JOURNAL ARTICLE                                                                                                                                                                                                                                                                                                     |
| rhoa | rac1   | <a href="http://www.ncbi.nlm.nih.gov/entrez/query.fcgi?cmd=Retrieve&amp;db=pubmed&amp;dopt=Abstract&amp;list_uids=27330411">http://www.ncbi.nlm.nih.gov/entrez/query.fcgi?cmd=Retrieve&amp;db=pubmed&amp;dopt=Abstract&amp;list_uids=27330411</a>  6 Cancer Cell Int 16  2016 Journal Article  <a href="http://www.ncbi.nlm.nih.gov/entrez/query.fcgi?cmd=Retrieve&amp;db=pubmed&amp;dopt=Abstract&amp;list_uids=27340868">http://www.ncbi.nlm.nih.gov/entrez/query.fcgi?cmd=Retrieve&amp;db=pubmed&amp;dopt=Abstract&amp;list_uids=27340868</a>  6 Oncotarget  Jun 2016 JOURNAL ARTICLE      |
| rhoa | ephb2  | <a href="http://www.ncbi.nlm.nih.gov/entrez/query.fcgi?cmd=Retrieve&amp;db=pubmed&amp;dopt=Abstract&amp;list_uids=27391444">http://www.ncbi.nlm.nih.gov/entrez/query.fcgi?cmd=Retrieve&amp;db=pubmed&amp;dopt=Abstract&amp;list_uids=27391444</a>  6 Oncotarget  Jul 2016 JOURNAL ARTICLE                                                                                                                                                                                                                                                                                                     |
| rhoa | mlc1   | <a href="http://www.ncbi.nlm.nih.gov/entrez/query.fcgi?cmd=Retrieve&amp;db=pubmed&amp;dopt=Abstract&amp;list_uids=27432222">http://www.ncbi.nlm.nih.gov/entrez/query.fcgi?cmd=Retrieve&amp;db=pubmed&amp;dopt=Abstract&amp;list_uids=27432222</a>  6 Mol Med Rep 14 3 Sep 2016 Journal Article                                                                                                                                                                                                                                                                                                |
| rhoa | myh14  | <a href="http://www.ncbi.nlm.nih.gov/entrez/query.fcgi?cmd=Retrieve&amp;db=pubmed&amp;dopt=Abstract&amp;list_uids=27432222">http://www.ncbi.nlm.nih.gov/entrez/query.fcgi?cmd=Retrieve&amp;db=pubmed&amp;dopt=Abstract&amp;list_uids=27432222</a>  6 Mol Med Rep 14 3 Sep 2016 Journal Article                                                                                                                                                                                                                                                                                                |
| rhoa | cxcr4  | <a href="http://www.ncbi.nlm.nih.gov/entrez/query.fcgi?cmd=Retrieve&amp;db=pubmed&amp;dopt=Abstract&amp;list_uids=27517626">http://www.ncbi.nlm.nih.gov/entrez/query.fcgi?cmd=Retrieve&amp;db=pubmed&amp;dopt=Abstract&amp;list_uids=27517626</a>  6 Oncotarget  Aug 2016 JOURNAL ARTICLE                                                                                                                                                                                                                                                                                                     |
| snx9 | src    | <a href="http://www.ncbi.nlm.nih.gov/entrez/query.fcgi?cmd=Retrieve&amp;db=pubmed&amp;dopt=Abstract&amp;list_uids=27278018">http://www.ncbi.nlm.nih.gov/entrez/query.fcgi?cmd=Retrieve&amp;db=pubmed&amp;dopt=Abstract&amp;list_uids=27278018</a>  6 J Cell Sci 129 14 Jul 2016 Journal Article                                                                                                                                                                                                                                                                                               |
| ros1 | decr1  | <a href="http://www.ncbi.nlm.nih.gov/entrez/query.fcgi?cmd=Retrieve&amp;db=pubmed&amp;dopt=Abstract&amp;list_uids=27315395">http://www.ncbi.nlm.nih.gov/entrez/query.fcgi?cmd=Retrieve&amp;db=pubmed&amp;dopt=Abstract&amp;list_uids=27315395</a>  6 Mol Oral Microbiol  Jun 2016 JOURNAL ARTICLE                                                                                                                                                                                                                                                                                             |
| ros1 | mapk14 | <a href="http://www.ncbi.nlm.nih.gov/entrez/query.fcgi?cmd=Retrieve&amp;db=pubmed&amp;dopt=Abstract&amp;list_uids=27366113">http://www.ncbi.nlm.nih.gov/entrez/query.fcgi?cmd=Retrieve&amp;db=pubmed&amp;dopt=Abstract&amp;list_uids=27366113</a>  6 Cancer Cell Int 16  2016 Journal Article  <a href="http://www.ncbi.nlm.nih.gov/entrez/query.fcgi?cmd=Retrieve&amp;db=pubmed&amp;dopt=Abstract&amp;list_uids=27278736">http://www.ncbi.nlm.nih.gov/entrez/query.fcgi?cmd=Retrieve&amp;db=pubmed&amp;dopt=Abstract&amp;list_uids=27278736</a>  6 Int J Oncol 49 2 Aug 2016 Journal Article |
| ros1 | mapk8  | <a href="http://www.ncbi.nlm.nih.gov/entrez/query.fcgi?cmd=Retrieve&amp;db=pubmed&amp;dopt=Abstract&amp;list_uids=27366113">http://www.ncbi.nlm.nih.gov/entrez/query.fcgi?cmd=Retrieve&amp;db=pubmed&amp;dopt=Abstract&amp;list_uids=27366113</a>  6 Cancer Cell Int 16  2016 Journal Article                                                                                                                                                                                                                                                                                                 |
| ros1 | mapk3  | <a href="http://www.ncbi.nlm.nih.gov/entrez/query.fcgi?cmd=Retrieve&amp;db=pubmed&amp;dopt=Abstract&amp;list_uids=27366113">http://www.ncbi.nlm.nih.gov/entrez/query.fcgi?cmd=Retrieve&amp;db=pubmed&amp;dopt=Abstract&amp;list_uids=27366113</a>  6 Cancer Cell Int 16  2016 Journal Article                                                                                                                                                                                                                                                                                                 |

|        |          |                                                                                                                                                                                                                                                                                                                                                                                                                                                                                                                                                                                                                                                                                                                                                                                                                                                                                           |
|--------|----------|-------------------------------------------------------------------------------------------------------------------------------------------------------------------------------------------------------------------------------------------------------------------------------------------------------------------------------------------------------------------------------------------------------------------------------------------------------------------------------------------------------------------------------------------------------------------------------------------------------------------------------------------------------------------------------------------------------------------------------------------------------------------------------------------------------------------------------------------------------------------------------------------|
| ros1   | sp1      | <a href="http://www.ncbi.nlm.nih.gov/entrez/query.fcgi?cmd=Retrieve&amp;db=pubmed&amp;dopt=Abstract&amp;list_uids=27416558">http://www.ncbi.nlm.nih.gov/entrez/query.fcgi?cmd=Retrieve&amp;db=pubmed&amp;dopt=Abstract&amp;list_uids=27416558</a>  6 Biomed Pharmacother 83  Jul 2016 JOURNAL ARTICLE                                                                                                                                                                                                                                                                                                                                                                                                                                                                                                                                                                                     |
| ros1   | prkaa1   | <a href="http://www.ncbi.nlm.nih.gov/entrez/query.fcgi?cmd=Retrieve&amp;db=pubmed&amp;dopt=Abstract&amp;list_uids=27416558">http://www.ncbi.nlm.nih.gov/entrez/query.fcgi?cmd=Retrieve&amp;db=pubmed&amp;dopt=Abstract&amp;list_uids=27416558</a>  6 Biomed Pharmacother 83  Jul 2016 JOURNAL ARTICLE                                                                                                                                                                                                                                                                                                                                                                                                                                                                                                                                                                                     |
| ros1   | aprt     | <a href="http://www.ncbi.nlm.nih.gov/entrez/query.fcgi?cmd=Retrieve&amp;db=pubmed&amp;dopt=Abstract&amp;list_uids=27416558">http://www.ncbi.nlm.nih.gov/entrez/query.fcgi?cmd=Retrieve&amp;db=pubmed&amp;dopt=Abstract&amp;list_uids=27416558</a>  6 Biomed Pharmacother 83  Jul 2016 JOURNAL ARTICLE                                                                                                                                                                                                                                                                                                                                                                                                                                                                                                                                                                                     |
| ros1   | vegfa    | <a href="http://www.ncbi.nlm.nih.gov/entrez/query.fcgi?cmd=Retrieve&amp;db=pubmed&amp;dopt=Abstract&amp;list_uids=27498749">http://www.ncbi.nlm.nih.gov/entrez/query.fcgi?cmd=Retrieve&amp;db=pubmed&amp;dopt=Abstract&amp;list_uids=27498749</a>  6 Int J Oncol   Aug 2016 JOURNAL ARTICLE                                                                                                                                                                                                                                                                                                                                                                                                                                                                                                                                                                                               |
| ros1   | ephb2    | <a href="http://www.ncbi.nlm.nih.gov/entrez/query.fcgi?cmd=Retrieve&amp;db=pubmed&amp;dopt=Abstract&amp;list_uids=27278736">http://www.ncbi.nlm.nih.gov/entrez/query.fcgi?cmd=Retrieve&amp;db=pubmed&amp;dopt=Abstract&amp;list_uids=27278736</a>  6 Int J Oncol 49 2 Aug 2016 Journal Article  <a href="http://www.ncbi.nlm.nih.gov/entrez/query.fcgi?cmd=Retrieve&amp;db=pubmed&amp;dopt=Abstract&amp;list_uids=27481258">http://www.ncbi.nlm.nih.gov/entrez/query.fcgi?cmd=Retrieve&amp;db=pubmed&amp;dopt=Abstract&amp;list_uids=27481258</a>  6 Lasers Med Sci   Aug 2016 JOURNAL ARTICLE  <a href="http://www.ncbi.nlm.nih.gov/entrez/query.fcgi?cmd=Retrieve&amp;db=pubmed&amp;dopt=Abstract&amp;list_uids=27572503">http://www.ncbi.nlm.nih.gov/entrez/query.fcgi?cmd=Retrieve&amp;db=pubmed&amp;dopt=Abstract&amp;list_uids=27572503</a>  6 Oncol Rep   Aug 2016 JOURNAL ARTICLE |
| ros1   | mmp9     | <a href="http://www.ncbi.nlm.nih.gov/entrez/query.fcgi?cmd=Retrieve&amp;db=pubmed&amp;dopt=Abstract&amp;list_uids=27481258">http://www.ncbi.nlm.nih.gov/entrez/query.fcgi?cmd=Retrieve&amp;db=pubmed&amp;dopt=Abstract&amp;list_uids=27481258</a>  6 Lasers Med Sci   Aug 2016 JOURNAL ARTICLE  <a href="http://www.ncbi.nlm.nih.gov/entrez/query.fcgi?cmd=Retrieve&amp;db=pubmed&amp;dopt=Abstract&amp;list_uids=27572503">http://www.ncbi.nlm.nih.gov/entrez/query.fcgi?cmd=Retrieve&amp;db=pubmed&amp;dopt=Abstract&amp;list_uids=27572503</a>  6 Oncol Rep   Aug 2016 JOURNAL ARTICLE                                                                                                                                                                                                                                                                                                 |
| ros1   | mmp2     | <a href="http://www.ncbi.nlm.nih.gov/entrez/query.fcgi?cmd=Retrieve&amp;db=pubmed&amp;dopt=Abstract&amp;list_uids=27481258">http://www.ncbi.nlm.nih.gov/entrez/query.fcgi?cmd=Retrieve&amp;db=pubmed&amp;dopt=Abstract&amp;list_uids=27481258</a>  6 Lasers Med Sci   Aug 2016 JOURNAL ARTICLE  <a href="http://www.ncbi.nlm.nih.gov/entrez/query.fcgi?cmd=Retrieve&amp;db=pubmed&amp;dopt=Abstract&amp;list_uids=27572503">http://www.ncbi.nlm.nih.gov/entrez/query.fcgi?cmd=Retrieve&amp;db=pubmed&amp;dopt=Abstract&amp;list_uids=27572503</a>  6 Oncol Rep   Aug 2016 JOURNAL ARTICLE                                                                                                                                                                                                                                                                                                 |
| slc2a1 | vegfa    | <a href="http://www.ncbi.nlm.nih.gov/entrez/query.fcgi?cmd=Retrieve&amp;db=pubmed&amp;dopt=Abstract&amp;list_uids=27409833">http://www.ncbi.nlm.nih.gov/entrez/query.fcgi?cmd=Retrieve&amp;db=pubmed&amp;dopt=Abstract&amp;list_uids=27409833</a>  6 Oncotarget   Jul 2016 JOURNAL ARTICLE                                                                                                                                                                                                                                                                                                                                                                                                                                                                                                                                                                                                |
| plau   | slc2a1   | <a href="http://www.ncbi.nlm.nih.gov/entrez/query.fcgi?cmd=Retrieve&amp;db=pubmed&amp;dopt=Abstract&amp;list_uids=27278736">http://www.ncbi.nlm.nih.gov/entrez/query.fcgi?cmd=Retrieve&amp;db=pubmed&amp;dopt=Abstract&amp;list_uids=27278736</a>  6 Int J Oncol 49 2 Aug 2016 Journal Article                                                                                                                                                                                                                                                                                                                                                                                                                                                                                                                                                                                            |
| plau   | fpr1     | <a href="http://www.ncbi.nlm.nih.gov/entrez/query.fcgi?cmd=Retrieve&amp;db=pubmed&amp;dopt=Abstract&amp;list_uids=27323409">http://www.ncbi.nlm.nih.gov/entrez/query.fcgi?cmd=Retrieve&amp;db=pubmed&amp;dopt=Abstract&amp;list_uids=27323409</a>  6 Oncotarget   Jun 2016 JOURNAL ARTICLE                                                                                                                                                                                                                                                                                                                                                                                                                                                                                                                                                                                                |
| plau   | pcsk1    | <a href="http://www.ncbi.nlm.nih.gov/entrez/query.fcgi?cmd=Retrieve&amp;db=pubmed&amp;dopt=Abstract&amp;list_uids=27385093">http://www.ncbi.nlm.nih.gov/entrez/query.fcgi?cmd=Retrieve&amp;db=pubmed&amp;dopt=Abstract&amp;list_uids=27385093</a>  6 Oncotarget   Jul 2016 JOURNAL ARTICLE                                                                                                                                                                                                                                                                                                                                                                                                                                                                                                                                                                                                |
| plau   | igf1r    | <a href="http://www.ncbi.nlm.nih.gov/entrez/query.fcgi?cmd=Retrieve&amp;db=pubmed&amp;dopt=Abstract&amp;list_uids=27502396">http://www.ncbi.nlm.nih.gov/entrez/query.fcgi?cmd=Retrieve&amp;db=pubmed&amp;dopt=Abstract&amp;list_uids=27502396</a>  6 BMC Cancer 16   2016 Journal Article                                                                                                                                                                                                                                                                                                                                                                                                                                                                                                                                                                                                 |
| plau   | serpine1 | <a href="http://www.ncbi.nlm.nih.gov/entrez/query.fcgi?cmd=Retrieve&amp;db=pubmed&amp;dopt=Abstract&amp;list_uids=27490118">http://www.ncbi.nlm.nih.gov/entrez/query.fcgi?cmd=Retrieve&amp;db=pubmed&amp;dopt=Abstract&amp;list_uids=27490118</a>  6 PLoS One 11 8  2016 Journal Article  <a href="http://www.ncbi.nlm.nih.gov/entrez/query.fcgi?cmd=Retrieve&amp;db=pubmed&amp;dopt=Abstract&amp;list_uids=27558262">http://www.ncbi.nlm.nih.gov/entrez/query.fcgi?cmd=Retrieve&amp;db=pubmed&amp;dopt=Abstract&amp;list_uids=27558262</a>  6 Contrast Media Mol Imaging   Aug 2016 JOURNAL                                                                                                                                                                                                                                                                                              |

|        |        |                                                                                                                                                                                                                                                                                                                                                                                                                                       |
|--------|--------|---------------------------------------------------------------------------------------------------------------------------------------------------------------------------------------------------------------------------------------------------------------------------------------------------------------------------------------------------------------------------------------------------------------------------------------|
|        |        | ARTICLE http://www.ncbi.nlm.nih.gov/entrez/query.fcgi?cmd=Retrieve&db=pubmed&dopt=Abstract&list_uids=27502396 6 BMC Cancer 16  2016 Journal Article                                                                                                                                                                                                                                                                                   |
| plau   | plaur  | http://www.ncbi.nlm.nih.gov/entrez/query.fcgi?cmd=Retrieve&db=pubmed&dopt=Abstract&list_uids=27323409 6 Oncotarget  Jun 2016 JOURNAL ARTICLE http://www.ncbi.nlm.nih.gov/entrez/query.fcgi?cmd=Retrieve&db=pubmed&dopt=Abstract&list_uids=27602956 6 Oncotarget  Sep 2016 JOURNAL ARTICLE http://www.ncbi.nlm.nih.gov/entrez/query.fcgi?cmd=Retrieve&db=pubmed&dopt=Abstract&list_uids=27502396 6 BMC Cancer 16  2016 Journal Article |
| na     | mapk14 | http://www.ncbi.nlm.nih.gov/entrez/query.fcgi?cmd=Retrieve&db=pubmed&dopt=Abstract&list_uids=27278736 6 Int J Oncol 49 2 Aug 2016 Journal Article                                                                                                                                                                                                                                                                                     |
| na     | ephb2  | http://www.ncbi.nlm.nih.gov/entrez/query.fcgi?cmd=Retrieve&db=pubmed&dopt=Abstract&list_uids=27278736 6 Int J Oncol 49 2 Aug 2016 Journal Article http://www.ncbi.nlm.nih.gov/entrez/query.fcgi?cmd=Retrieve&db=pubmed&dopt=Abstract&list_uids=27572503 6 Oncol Rep  Aug 2016 JOURNAL ARTICLE                                                                                                                                         |
| na     | mmp9   | http://www.ncbi.nlm.nih.gov/entrez/query.fcgi?cmd=Retrieve&db=pubmed&dopt=Abstract&list_uids=27572503 6 Oncol Rep  Aug 2016 JOURNAL ARTICLE                                                                                                                                                                                                                                                                                           |
| na     | mmp2   | http://www.ncbi.nlm.nih.gov/entrez/query.fcgi?cmd=Retrieve&db=pubmed&dopt=Abstract&list_uids=27572503 6 Oncol Rep  Aug 2016 JOURNAL ARTICLE                                                                                                                                                                                                                                                                                           |
| na     | ros1   | http://www.ncbi.nlm.nih.gov/entrez/query.fcgi?cmd=Retrieve&db=pubmed&dopt=Abstract&list_uids=27572503 6 Oncol Rep  Aug 2016 JOURNAL ARTICLE                                                                                                                                                                                                                                                                                           |
| axpc1  | pcsk1  | http://www.ncbi.nlm.nih.gov/entrez/query.fcgi?cmd=Retrieve&db=pubmed&dopt=Abstract&list_uids=27569589 6 Life Sci  Aug 2016 JOURNAL ARTICLE                                                                                                                                                                                                                                                                                            |
| lox12  | axpc1  | http://www.ncbi.nlm.nih.gov/entrez/query.fcgi?cmd=Retrieve&db=pubmed&dopt=Abstract&list_uids=27278788 6 J Hum Genet  Jun 2016 JOURNAL ARTICLE                                                                                                                                                                                                                                                                                         |
| bad    | chek1  | http://www.ncbi.nlm.nih.gov/entrez/query.fcgi?cmd=Retrieve&db=pubmed&dopt=Abstract&list_uids=27279256 6 Int J Oncol 49 2 Aug 2016 Journal Article                                                                                                                                                                                                                                                                                     |
| bad    | tp53   | http://www.ncbi.nlm.nih.gov/entrez/query.fcgi?cmd=Retrieve&db=pubmed&dopt=Abstract&list_uids=27279256 6 Int J Oncol 49 2 Aug 2016 Journal Article                                                                                                                                                                                                                                                                                     |
| twist1 | h2afx  | http://www.ncbi.nlm.nih.gov/entrez/query.fcgi?cmd=Retrieve&db=pubmed&dopt=Abstract&list_uids=27315462 6 Cell Cycle 15 18 Sep 2016 Journal Article                                                                                                                                                                                                                                                                                     |
| twist1 | uts2r  | http://www.ncbi.nlm.nih.gov/entrez/query.fcgi?cmd=Retrieve&db=pubmed&dopt=Abstract&list_uids=27460728 6 Eur Rev Med Pharmacol Sci 20 14 Jul 2016 Journal Article                                                                                                                                                                                                                                                                      |
| twist1 | fos    | http://www.ncbi.nlm.nih.gov/entrez/query.fcgi?cmd=Retrieve&db=pubmed&dopt=Abstract&list_uids=27524420 6 Oncogene  Aug 2016 JOURNAL ARTICLE                                                                                                                                                                                                                                                                                            |
| twist1 | ervk2  | http://www.ncbi.nlm.nih.gov/entrez/query.fcgi?cmd=Retrieve&db=pubmed&dopt=Abstract&list_uids=27524420 6 Oncogene  Aug 2016 JOURNAL ARTICLE                                                                                                                                                                                                                                                                                            |

|        |        |                                                                                                                                                                                                                                                                                                                                                                                                                                                                                                                                                                                                           |
|--------|--------|-----------------------------------------------------------------------------------------------------------------------------------------------------------------------------------------------------------------------------------------------------------------------------------------------------------------------------------------------------------------------------------------------------------------------------------------------------------------------------------------------------------------------------------------------------------------------------------------------------------|
| twist1 | itk    | <a href="http://www.ncbi.nlm.nih.gov/entrez/query.fcgi?cmd=Retrieve&amp;db=pubmed&amp;dopt=Abstract&amp;list_uids=27279287">http://www.ncbi.nlm.nih.gov/entrez/query.fcgi?cmd=Retrieve&amp;db=pubmed&amp;dopt=Abstract&amp;list_uids=27279287</a>  6 Oncol Rep 36 2 Aug 2016 Journal Article  <a href="http://www.ncbi.nlm.nih.gov/entrez/query.fcgi?cmd=Retrieve&amp;db=pubmed&amp;dopt=Abstract&amp;list_uids=27524420">http://www.ncbi.nlm.nih.gov/entrez/query.fcgi?cmd=Retrieve&amp;db=pubmed&amp;dopt=Abstract&amp;list_uids=27524420</a>  6 Oncogene   Aug 2016 JOURNAL ARTICLE                    |
| twist1 | foxa1  | <a href="http://www.ncbi.nlm.nih.gov/entrez/query.fcgi?cmd=Retrieve&amp;db=pubmed&amp;dopt=Abstract&amp;list_uids=27524420">http://www.ncbi.nlm.nih.gov/entrez/query.fcgi?cmd=Retrieve&amp;db=pubmed&amp;dopt=Abstract&amp;list_uids=27524420</a>  6 Oncogene   Aug 2016 JOURNAL ARTICLE                                                                                                                                                                                                                                                                                                                  |
| twist1 | magea4 | <a href="http://www.ncbi.nlm.nih.gov/entrez/query.fcgi?cmd=Retrieve&amp;db=pubmed&amp;dopt=Abstract&amp;list_uids=27533647">http://www.ncbi.nlm.nih.gov/entrez/query.fcgi?cmd=Retrieve&amp;db=pubmed&amp;dopt=Abstract&amp;list_uids=27533647</a>  6 Mol Carcinog   Aug 2016 JOURNAL ARTICLE                                                                                                                                                                                                                                                                                                              |
| foxm1  | twist1 | <a href="http://www.ncbi.nlm.nih.gov/entrez/query.fcgi?cmd=Retrieve&amp;db=pubmed&amp;dopt=Abstract&amp;list_uids=27279287">http://www.ncbi.nlm.nih.gov/entrez/query.fcgi?cmd=Retrieve&amp;db=pubmed&amp;dopt=Abstract&amp;list_uids=27279287</a>  6 Oncol Rep 36 2 Aug 2016 Journal Article                                                                                                                                                                                                                                                                                                              |
| smad4  | itk    | <a href="http://www.ncbi.nlm.nih.gov/entrez/query.fcgi?cmd=Retrieve&amp;db=pubmed&amp;dopt=Abstract&amp;list_uids=27279345">http://www.ncbi.nlm.nih.gov/entrez/query.fcgi?cmd=Retrieve&amp;db=pubmed&amp;dopt=Abstract&amp;list_uids=27279345</a>  6 Int J Oncol 49 2 Aug 2016 Journal Article                                                                                                                                                                                                                                                                                                            |
| smad4  | uts2r  | <a href="http://www.ncbi.nlm.nih.gov/entrez/query.fcgi?cmd=Retrieve&amp;db=pubmed&amp;dopt=Abstract&amp;list_uids=27279345">http://www.ncbi.nlm.nih.gov/entrez/query.fcgi?cmd=Retrieve&amp;db=pubmed&amp;dopt=Abstract&amp;list_uids=27279345</a>  6 Int J Oncol 49 2 Aug 2016 Journal Article  <a href="http://www.ncbi.nlm.nih.gov/entrez/query.fcgi?cmd=Retrieve&amp;db=pubmed&amp;dopt=Abstract&amp;list_uids=27286257">http://www.ncbi.nlm.nih.gov/entrez/query.fcgi?cmd=Retrieve&amp;db=pubmed&amp;dopt=Abstract&amp;list_uids=27286257</a>  6 Oncotarget   Jun 2016 JOURNAL ARTICLE                |
| smad4  | spp1   | <a href="http://www.ncbi.nlm.nih.gov/entrez/query.fcgi?cmd=Retrieve&amp;db=pubmed&amp;dopt=Abstract&amp;list_uids=27498705">http://www.ncbi.nlm.nih.gov/entrez/query.fcgi?cmd=Retrieve&amp;db=pubmed&amp;dopt=Abstract&amp;list_uids=27498705</a>  6 Oncol Rep   Aug 2016 JOURNAL ARTICLE                                                                                                                                                                                                                                                                                                                 |
| smad4  | lef1   | <a href="http://www.ncbi.nlm.nih.gov/entrez/query.fcgi?cmd=Retrieve&amp;db=pubmed&amp;dopt=Abstract&amp;list_uids=27595937">http://www.ncbi.nlm.nih.gov/entrez/query.fcgi?cmd=Retrieve&amp;db=pubmed&amp;dopt=Abstract&amp;list_uids=27595937</a>  6 Sci Rep 6   2016 Journal Article                                                                                                                                                                                                                                                                                                                     |
| smad4  | hpse   | <a href="http://www.ncbi.nlm.nih.gov/entrez/query.fcgi?cmd=Retrieve&amp;db=pubmed&amp;dopt=Abstract&amp;list_uids=27595937">http://www.ncbi.nlm.nih.gov/entrez/query.fcgi?cmd=Retrieve&amp;db=pubmed&amp;dopt=Abstract&amp;list_uids=27595937</a>  6 Sci Rep 6   2016 Journal Article                                                                                                                                                                                                                                                                                                                     |
| mapk7  | mapk8  | <a href="http://www.ncbi.nlm.nih.gov/entrez/query.fcgi?cmd=Retrieve&amp;db=pubmed&amp;dopt=Abstract&amp;list_uids=27279438">http://www.ncbi.nlm.nih.gov/entrez/query.fcgi?cmd=Retrieve&amp;db=pubmed&amp;dopt=Abstract&amp;list_uids=27279438</a>  6 Oncol Rep 36 2 Aug 2016 Journal Article                                                                                                                                                                                                                                                                                                              |
| rela   | hcc    | <a href="http://www.ncbi.nlm.nih.gov/entrez/query.fcgi?cmd=Retrieve&amp;db=pubmed&amp;dopt=Abstract&amp;list_uids=27486225">http://www.ncbi.nlm.nih.gov/entrez/query.fcgi?cmd=Retrieve&amp;db=pubmed&amp;dopt=Abstract&amp;list_uids=27486225</a>  6 Mol Cancer Ther   Aug 2016 JOURNAL ARTICLE                                                                                                                                                                                                                                                                                                           |
| rela   | macc1  | <a href="http://www.ncbi.nlm.nih.gov/entrez/query.fcgi?cmd=Retrieve&amp;db=pubmed&amp;dopt=Abstract&amp;list_uids=27529686">http://www.ncbi.nlm.nih.gov/entrez/query.fcgi?cmd=Retrieve&amp;db=pubmed&amp;dopt=Abstract&amp;list_uids=27529686</a>  6 Int J Cancer   Aug 2016 JOURNAL ARTICLE                                                                                                                                                                                                                                                                                                              |
| rela   | mapk14 | <a href="http://www.ncbi.nlm.nih.gov/entrez/query.fcgi?cmd=Retrieve&amp;db=pubmed&amp;dopt=Abstract&amp;list_uids=27529686">http://www.ncbi.nlm.nih.gov/entrez/query.fcgi?cmd=Retrieve&amp;db=pubmed&amp;dopt=Abstract&amp;list_uids=27529686</a>  6 Int J Cancer   Aug 2016 JOURNAL ARTICLE  <a href="http://www.ncbi.nlm.nih.gov/entrez/query.fcgi?cmd=Retrieve&amp;db=pubmed&amp;dopt=Abstract&amp;list_uids=27393618">http://www.ncbi.nlm.nih.gov/entrez/query.fcgi?cmd=Retrieve&amp;db=pubmed&amp;dopt=Abstract&amp;list_uids=27393618</a>  6 Breast Cancer Res Treat 158 3 Aug 2016 Journal Article |
| tlr4   | rela   | <a href="http://www.ncbi.nlm.nih.gov/entrez/query.fcgi?cmd=Retrieve&amp;db=pubmed&amp;dopt=Abstract&amp;list_uids=27279714">http://www.ncbi.nlm.nih.gov/entrez/query.fcgi?cmd=Retrieve&amp;db=pubmed&amp;dopt=Abstract&amp;list_uids=27279714</a>  6 Pharmacogn Mag 12 Suppl 2 May 2016 Journal Article                                                                                                                                                                                                                                                                                                   |
| tlr4   | irf6   | <a href="http://www.ncbi.nlm.nih.gov/entrez/query.fcgi?cmd=Retrieve&amp;db=pubmed&amp;dopt=Abstract&amp;list_uids=27409669">http://www.ncbi.nlm.nih.gov/entrez/query.fcgi?cmd=Retrieve&amp;db=pubmed&amp;dopt=Abstract&amp;list_uids=27409669</a>  6 Oncotarget   Jul 2016 JOURNAL ARTICLE                                                                                                                                                                                                                                                                                                                |

|         |         |                                                                                                                                                                                                                                                                                               |
|---------|---------|-----------------------------------------------------------------------------------------------------------------------------------------------------------------------------------------------------------------------------------------------------------------------------------------------|
| tlr4    | ly96    | <a href="http://www.ncbi.nlm.nih.gov/entrez/query.fcgi?cmd=Retrieve&amp;db=pubmed&amp;dopt=Abstract&amp;list_uids=27409669">http://www.ncbi.nlm.nih.gov/entrez/query.fcgi?cmd=Retrieve&amp;db=pubmed&amp;dopt=Abstract&amp;list_uids=27409669</a>  6 Oncotarget  Jul 2016 JOURNAL ARTICLE     |
| tlr4    | mapk14  | <a href="http://www.ncbi.nlm.nih.gov/entrez/query.fcgi?cmd=Retrieve&amp;db=pubmed&amp;dopt=Abstract&amp;list_uids=27446390">http://www.ncbi.nlm.nih.gov/entrez/query.fcgi?cmd=Retrieve&amp;db=pubmed&amp;dopt=Abstract&amp;list_uids=27446390</a>  6 Oncol Lett 12 2 Aug 2016 JOURNAL ARTICLE |
| tlr4    | map3k5  | <a href="http://www.ncbi.nlm.nih.gov/entrez/query.fcgi?cmd=Retrieve&amp;db=pubmed&amp;dopt=Abstract&amp;list_uids=27446390">http://www.ncbi.nlm.nih.gov/entrez/query.fcgi?cmd=Retrieve&amp;db=pubmed&amp;dopt=Abstract&amp;list_uids=27446390</a>  6 Oncol Lett 12 2 Aug 2016 JOURNAL ARTICLE |
| tlr4    | myd88   | <a href="http://www.ncbi.nlm.nih.gov/entrez/query.fcgi?cmd=Retrieve&amp;db=pubmed&amp;dopt=Abstract&amp;list_uids=27446390">http://www.ncbi.nlm.nih.gov/entrez/query.fcgi?cmd=Retrieve&amp;db=pubmed&amp;dopt=Abstract&amp;list_uids=27446390</a>  6 Oncol Lett 12 2 Aug 2016 JOURNAL ARTICLE |
| muc4    | ca9     | <a href="http://www.ncbi.nlm.nih.gov/entrez/query.fcgi?cmd=Retrieve&amp;db=pubmed&amp;dopt=Abstract&amp;list_uids=27283771">http://www.ncbi.nlm.nih.gov/entrez/query.fcgi?cmd=Retrieve&amp;db=pubmed&amp;dopt=Abstract&amp;list_uids=27283771</a>  6 Oncotarget  Jun 2016 JOURNAL ARTICLE     |
| muc4    | aicda   | <a href="http://www.ncbi.nlm.nih.gov/entrez/query.fcgi?cmd=Retrieve&amp;db=pubmed&amp;dopt=Abstract&amp;list_uids=27283771">http://www.ncbi.nlm.nih.gov/entrez/query.fcgi?cmd=Retrieve&amp;db=pubmed&amp;dopt=Abstract&amp;list_uids=27283771</a>  6 Oncotarget  Jun 2016 JOURNAL ARTICLE     |
| muc4    | 3.5.1.4 | <a href="http://www.ncbi.nlm.nih.gov/entrez/query.fcgi?cmd=Retrieve&amp;db=pubmed&amp;dopt=Abstract&amp;list_uids=27283771">http://www.ncbi.nlm.nih.gov/entrez/query.fcgi?cmd=Retrieve&amp;db=pubmed&amp;dopt=Abstract&amp;list_uids=27283771</a>  6 Oncotarget  Jun 2016 JOURNAL ARTICLE     |
| muc4    | eno3    | <a href="http://www.ncbi.nlm.nih.gov/entrez/query.fcgi?cmd=Retrieve&amp;db=pubmed&amp;dopt=Abstract&amp;list_uids=27283771">http://www.ncbi.nlm.nih.gov/entrez/query.fcgi?cmd=Retrieve&amp;db=pubmed&amp;dopt=Abstract&amp;list_uids=27283771</a>  6 Oncotarget  Jun 2016 JOURNAL ARTICLE     |
| muc1    | ca9     | <a href="http://www.ncbi.nlm.nih.gov/entrez/query.fcgi?cmd=Retrieve&amp;db=pubmed&amp;dopt=Abstract&amp;list_uids=27283771">http://www.ncbi.nlm.nih.gov/entrez/query.fcgi?cmd=Retrieve&amp;db=pubmed&amp;dopt=Abstract&amp;list_uids=27283771</a>  6 Oncotarget  Jun 2016 JOURNAL ARTICLE     |
| muc1    | aicda   | <a href="http://www.ncbi.nlm.nih.gov/entrez/query.fcgi?cmd=Retrieve&amp;db=pubmed&amp;dopt=Abstract&amp;list_uids=27283771">http://www.ncbi.nlm.nih.gov/entrez/query.fcgi?cmd=Retrieve&amp;db=pubmed&amp;dopt=Abstract&amp;list_uids=27283771</a>  6 Oncotarget  Jun 2016 JOURNAL ARTICLE     |
| muc1    | 3.5.1.4 | <a href="http://www.ncbi.nlm.nih.gov/entrez/query.fcgi?cmd=Retrieve&amp;db=pubmed&amp;dopt=Abstract&amp;list_uids=27283771">http://www.ncbi.nlm.nih.gov/entrez/query.fcgi?cmd=Retrieve&amp;db=pubmed&amp;dopt=Abstract&amp;list_uids=27283771</a>  6 Oncotarget  Jun 2016 JOURNAL ARTICLE     |
| muc1    | eno3    | <a href="http://www.ncbi.nlm.nih.gov/entrez/query.fcgi?cmd=Retrieve&amp;db=pubmed&amp;dopt=Abstract&amp;list_uids=27283771">http://www.ncbi.nlm.nih.gov/entrez/query.fcgi?cmd=Retrieve&amp;db=pubmed&amp;dopt=Abstract&amp;list_uids=27283771</a>  6 Oncotarget  Jun 2016 JOURNAL ARTICLE     |
| muc1    | muc4    | <a href="http://www.ncbi.nlm.nih.gov/entrez/query.fcgi?cmd=Retrieve&amp;db=pubmed&amp;dopt=Abstract&amp;list_uids=27283771">http://www.ncbi.nlm.nih.gov/entrez/query.fcgi?cmd=Retrieve&amp;db=pubmed&amp;dopt=Abstract&amp;list_uids=27283771</a>  6 Oncotarget  Jun 2016 JOURNAL ARTICLE     |
| aicda   | ca9     | <a href="http://www.ncbi.nlm.nih.gov/entrez/query.fcgi?cmd=Retrieve&amp;db=pubmed&amp;dopt=Abstract&amp;list_uids=27283771">http://www.ncbi.nlm.nih.gov/entrez/query.fcgi?cmd=Retrieve&amp;db=pubmed&amp;dopt=Abstract&amp;list_uids=27283771</a>  6 Oncotarget  Jun 2016 JOURNAL ARTICLE     |
| 3.5.1.4 | ca9     | <a href="http://www.ncbi.nlm.nih.gov/entrez/query.fcgi?cmd=Retrieve&amp;db=pubmed&amp;dopt=Abstract&amp;list_uids=27283771">http://www.ncbi.nlm.nih.gov/entrez/query.fcgi?cmd=Retrieve&amp;db=pubmed&amp;dopt=Abstract&amp;list_uids=27283771</a>  6 Oncotarget  Jun 2016 JOURNAL ARTICLE     |
| 3.5.1.4 | aicda   | <a href="http://www.ncbi.nlm.nih.gov/entrez/query.fcgi?cmd=Retrieve&amp;db=pubmed&amp;dopt=Abstract&amp;list_uids=27283771">http://www.ncbi.nlm.nih.gov/entrez/query.fcgi?cmd=Retrieve&amp;db=pubmed&amp;dopt=Abstract&amp;list_uids=27283771</a>  6 Oncotarget  Jun 2016 JOURNAL ARTICLE     |
| mlxip   | snord87 | <a href="http://www.ncbi.nlm.nih.gov/entrez/query.fcgi?cmd=Retrieve&amp;db=pubmed&amp;dopt=Abstract&amp;list_uids=27323092">http://www.ncbi.nlm.nih.gov/entrez/query.fcgi?cmd=Retrieve&amp;db=pubmed&amp;dopt=Abstract&amp;list_uids=27323092</a>  6 Genet Mol Res 15 2  2016 Journal Article |
| mlxip   | tp53    | <a href="http://www.ncbi.nlm.nih.gov/entrez/query.fcgi?cmd=Retrieve&amp;db=pubmed&amp;dopt=Abstract&amp;list_uids=27472451">http://www.ncbi.nlm.nih.gov/entrez/query.fcgi?cmd=Retrieve&amp;db=pubmed&amp;dopt=Abstract&amp;list_uids=27472451</a>  6 Med Sci Monit 22   2016 Journal Article  |

|        |          |                                                                                                                                                                                                                                                                                                       |
|--------|----------|-------------------------------------------------------------------------------------------------------------------------------------------------------------------------------------------------------------------------------------------------------------------------------------------------------|
| mlxip  | mirn132  | <a href="http://www.ncbi.nlm.nih.gov/entrez/query.fcgi?cmd=Retrieve&amp;db=pubmed&amp;dopt=Abstract&amp;list_uids=27522003">http://www.ncbi.nlm.nih.gov/entrez/query.fcgi?cmd=Retrieve&amp;db=pubmed&amp;dopt=Abstract&amp;list_uids=27522003</a>  6 Biomed Pharmacother 83  Aug 2016 JOURNAL ARTICLE |
| klf5   | mlxip    | <a href="http://www.ncbi.nlm.nih.gov/entrez/query.fcgi?cmd=Retrieve&amp;db=pubmed&amp;dopt=Abstract&amp;list_uids=27284339">http://www.ncbi.nlm.nih.gov/entrez/query.fcgi?cmd=Retrieve&amp;db=pubmed&amp;dopt=Abstract&amp;list_uids=27284339</a>  6 Exp Ther Med 11 6 Jun 2016 JOURNAL ARTICLE       |
| hulc   | itk      | <a href="http://www.ncbi.nlm.nih.gov/entrez/query.fcgi?cmd=Retrieve&amp;db=pubmed&amp;dopt=Abstract&amp;list_uids=27285757">http://www.ncbi.nlm.nih.gov/entrez/query.fcgi?cmd=Retrieve&amp;db=pubmed&amp;dopt=Abstract&amp;list_uids=27285757</a>  6 Oncotarget  Jun 2016 JOURNAL ARTICLE             |
| hulc   | hcc      | <a href="http://www.ncbi.nlm.nih.gov/entrez/query.fcgi?cmd=Retrieve&amp;db=pubmed&amp;dopt=Abstract&amp;list_uids=27285757">http://www.ncbi.nlm.nih.gov/entrez/query.fcgi?cmd=Retrieve&amp;db=pubmed&amp;dopt=Abstract&amp;list_uids=27285757</a>  6 Oncotarget  Jun 2016 JOURNAL ARTICLE             |
| hulc   | zeb1     | <a href="http://www.ncbi.nlm.nih.gov/entrez/query.fcgi?cmd=Retrieve&amp;db=pubmed&amp;dopt=Abstract&amp;list_uids=27285757">http://www.ncbi.nlm.nih.gov/entrez/query.fcgi?cmd=Retrieve&amp;db=pubmed&amp;dopt=Abstract&amp;list_uids=27285757</a>  6 Oncotarget  Jun 2016 JOURNAL ARTICLE             |
| hulc   | nkx2     | <a href="http://www.ncbi.nlm.nih.gov/entrez/query.fcgi?cmd=Retrieve&amp;db=pubmed&amp;dopt=Abstract&amp;list_uids=27496341">http://www.ncbi.nlm.nih.gov/entrez/query.fcgi?cmd=Retrieve&amp;db=pubmed&amp;dopt=Abstract&amp;list_uids=27496341</a>  6 Gene 592 1 Oct 2016 Journal Article              |
| zeb1   | mirn200b | <a href="http://www.ncbi.nlm.nih.gov/entrez/query.fcgi?cmd=Retrieve&amp;db=pubmed&amp;dopt=Abstract&amp;list_uids=27307751">http://www.ncbi.nlm.nih.gov/entrez/query.fcgi?cmd=Retrieve&amp;db=pubmed&amp;dopt=Abstract&amp;list_uids=27307751</a>  6 Oncotargets Ther 9  2016 Journal Article         |
| zeb1   | stat3    | <a href="http://www.ncbi.nlm.nih.gov/entrez/query.fcgi?cmd=Retrieve&amp;db=pubmed&amp;dopt=Abstract&amp;list_uids=27471397">http://www.ncbi.nlm.nih.gov/entrez/query.fcgi?cmd=Retrieve&amp;db=pubmed&amp;dopt=Abstract&amp;list_uids=27471397</a>  6 Oncotargets Ther 9  2016 Journal Article         |
| zeb1   | jak2     | <a href="http://www.ncbi.nlm.nih.gov/entrez/query.fcgi?cmd=Retrieve&amp;db=pubmed&amp;dopt=Abstract&amp;list_uids=27471397">http://www.ncbi.nlm.nih.gov/entrez/query.fcgi?cmd=Retrieve&amp;db=pubmed&amp;dopt=Abstract&amp;list_uids=27471397</a>  6 Oncotargets Ther 9  2016 Journal Article         |
| pbx3   | hcc      | <a href="http://www.ncbi.nlm.nih.gov/entrez/query.fcgi?cmd=Retrieve&amp;db=pubmed&amp;dopt=Abstract&amp;list_uids=27285759">http://www.ncbi.nlm.nih.gov/entrez/query.fcgi?cmd=Retrieve&amp;db=pubmed&amp;dopt=Abstract&amp;list_uids=27285759</a>  6 Oncotarget  Jun 2016 JOURNAL ARTICLE             |
| sfmbt1 | dcun1d1  | <a href="http://www.ncbi.nlm.nih.gov/entrez/query.fcgi?cmd=Retrieve&amp;db=pubmed&amp;dopt=Abstract&amp;list_uids=27285984">http://www.ncbi.nlm.nih.gov/entrez/query.fcgi?cmd=Retrieve&amp;db=pubmed&amp;dopt=Abstract&amp;list_uids=27285984</a>  6 Oncotarget  Jun 2016 JOURNAL ARTICLE             |
| prtn3  | dcun1d1  | <a href="http://www.ncbi.nlm.nih.gov/entrez/query.fcgi?cmd=Retrieve&amp;db=pubmed&amp;dopt=Abstract&amp;list_uids=27285984">http://www.ncbi.nlm.nih.gov/entrez/query.fcgi?cmd=Retrieve&amp;db=pubmed&amp;dopt=Abstract&amp;list_uids=27285984</a>  6 Oncotarget  Jun 2016 JOURNAL ARTICLE             |
| erbb2  | zeb1     | <a href="http://www.ncbi.nlm.nih.gov/entrez/query.fcgi?cmd=Retrieve&amp;db=pubmed&amp;dopt=Abstract&amp;list_uids=27286256">http://www.ncbi.nlm.nih.gov/entrez/query.fcgi?cmd=Retrieve&amp;db=pubmed&amp;dopt=Abstract&amp;list_uids=27286256</a>  6 Oncotarget  Jun 2016 JOURNAL ARTICLE             |
| erbb2  | tjp1     | <a href="http://www.ncbi.nlm.nih.gov/entrez/query.fcgi?cmd=Retrieve&amp;db=pubmed&amp;dopt=Abstract&amp;list_uids=27286256">http://www.ncbi.nlm.nih.gov/entrez/query.fcgi?cmd=Retrieve&amp;db=pubmed&amp;dopt=Abstract&amp;list_uids=27286256</a>  6 Oncotarget  Jun 2016 JOURNAL ARTICLE             |
| erbb2  | cldn7    | <a href="http://www.ncbi.nlm.nih.gov/entrez/query.fcgi?cmd=Retrieve&amp;db=pubmed&amp;dopt=Abstract&amp;list_uids=27286256">http://www.ncbi.nlm.nih.gov/entrez/query.fcgi?cmd=Retrieve&amp;db=pubmed&amp;dopt=Abstract&amp;list_uids=27286256</a>  6 Oncotarget  Jun 2016 JOURNAL ARTICLE             |
| erbb2  | ptk2     | <a href="http://www.ncbi.nlm.nih.gov/entrez/query.fcgi?cmd=Retrieve&amp;db=pubmed&amp;dopt=Abstract&amp;list_uids=27286256">http://www.ncbi.nlm.nih.gov/entrez/query.fcgi?cmd=Retrieve&amp;db=pubmed&amp;dopt=Abstract&amp;list_uids=27286256</a>  6 Oncotarget  Jun 2016 JOURNAL ARTICLE             |
| erbb2  | creb1    | <a href="http://www.ncbi.nlm.nih.gov/entrez/query.fcgi?cmd=Retrieve&amp;db=pubmed&amp;dopt=Abstract&amp;list_uids=27409833">http://www.ncbi.nlm.nih.gov/entrez/query.fcgi?cmd=Retrieve&amp;db=pubmed&amp;dopt=Abstract&amp;list_uids=27409833</a>  6 Oncotarget  Jul 2016 JOURNAL ARTICLE             |
| tjp1   | zeb1     | <a href="http://www.ncbi.nlm.nih.gov/entrez/query.fcgi?cmd=Retrieve&amp;db=pubmed&amp;dopt=Abstract&amp;list_uids=27286256">http://www.ncbi.nlm.nih.gov/entrez/query.fcgi?cmd=Retrieve&amp;db=pubmed&amp;dopt=Abstract&amp;list_uids=27286256</a>  6 Oncotarget  Jun 2016 JOURNAL ARTICLE             |

|       |        |                                                                                                                                                                                                                                                                                                                                                                                                                                                                                                                                                                                                               |
|-------|--------|---------------------------------------------------------------------------------------------------------------------------------------------------------------------------------------------------------------------------------------------------------------------------------------------------------------------------------------------------------------------------------------------------------------------------------------------------------------------------------------------------------------------------------------------------------------------------------------------------------------|
| cox8a | smad4  | <a href="http://www.ncbi.nlm.nih.gov/entrez/query.fcgi?cmd=Retrieve&amp;db=pubmed&amp;dopt=Abstract&amp;list_uids=27286257">http://www.ncbi.nlm.nih.gov/entrez/query.fcgi?cmd=Retrieve&amp;db=pubmed&amp;dopt=Abstract&amp;list_uids=27286257</a>  6 Oncotarget  Jun 2016 JOURNAL ARTICLE                                                                                                                                                                                                                                                                                                                     |
| cox8a | ptger4 | <a href="http://www.ncbi.nlm.nih.gov/entrez/query.fcgi?cmd=Retrieve&amp;db=pubmed&amp;dopt=Abstract&amp;list_uids=27301070">http://www.ncbi.nlm.nih.gov/entrez/query.fcgi?cmd=Retrieve&amp;db=pubmed&amp;dopt=Abstract&amp;list_uids=27301070</a>  6 Stem Cells 34 9 Sep 2016 Journal Article                                                                                                                                                                                                                                                                                                                 |
| cox8a | dbt    | <a href="http://www.ncbi.nlm.nih.gov/entrez/query.fcgi?cmd=Retrieve&amp;db=pubmed&amp;dopt=Abstract&amp;list_uids=27301070">http://www.ncbi.nlm.nih.gov/entrez/query.fcgi?cmd=Retrieve&amp;db=pubmed&amp;dopt=Abstract&amp;list_uids=27301070</a>  6 Stem Cells 34 9 Sep 2016 Journal Article                                                                                                                                                                                                                                                                                                                 |
| egfr  | ccnd1  | <a href="http://www.ncbi.nlm.nih.gov/entrez/query.fcgi?cmd=Retrieve&amp;db=pubmed&amp;dopt=Abstract&amp;list_uids=27364926">http://www.ncbi.nlm.nih.gov/entrez/query.fcgi?cmd=Retrieve&amp;db=pubmed&amp;dopt=Abstract&amp;list_uids=27364926</a>  6 Sci Rep 6  2016 Journal Article                                                                                                                                                                                                                                                                                                                          |
| egfr  | akt2   | <a href="http://www.ncbi.nlm.nih.gov/entrez/query.fcgi?cmd=Retrieve&amp;db=pubmed&amp;dopt=Abstract&amp;list_uids=27364926">http://www.ncbi.nlm.nih.gov/entrez/query.fcgi?cmd=Retrieve&amp;db=pubmed&amp;dopt=Abstract&amp;list_uids=27364926</a>  6 Sci Rep 6  2016 Journal Article                                                                                                                                                                                                                                                                                                                          |
| egfr  | igf1r  | <a href="http://www.ncbi.nlm.nih.gov/entrez/query.fcgi?cmd=Retrieve&amp;db=pubmed&amp;dopt=Abstract&amp;list_uids=27374103">http://www.ncbi.nlm.nih.gov/entrez/query.fcgi?cmd=Retrieve&amp;db=pubmed&amp;dopt=Abstract&amp;list_uids=27374103</a>  6 Oncotarget  Jun 2016 JOURNAL ARTICLE                                                                                                                                                                                                                                                                                                                     |
| egfr  | insr   | <a href="http://www.ncbi.nlm.nih.gov/entrez/query.fcgi?cmd=Retrieve&amp;db=pubmed&amp;dopt=Abstract&amp;list_uids=27374103">http://www.ncbi.nlm.nih.gov/entrez/query.fcgi?cmd=Retrieve&amp;db=pubmed&amp;dopt=Abstract&amp;list_uids=27374103</a>  6 Oncotarget  Jun 2016 JOURNAL ARTICLE                                                                                                                                                                                                                                                                                                                     |
| egfr  | akt1   | <a href="http://www.ncbi.nlm.nih.gov/entrez/query.fcgi?cmd=Retrieve&amp;db=pubmed&amp;dopt=Abstract&amp;list_uids=27317099">http://www.ncbi.nlm.nih.gov/entrez/query.fcgi?cmd=Retrieve&amp;db=pubmed&amp;dopt=Abstract&amp;list_uids=27317099</a>  6 J Exp Clin Cancer Res 35 1  2016 Journal Article  <a href="http://www.ncbi.nlm.nih.gov/entrez/query.fcgi?cmd=Retrieve&amp;db=pubmed&amp;dopt=Abstract&amp;list_uids=27510965">http://www.ncbi.nlm.nih.gov/entrez/query.fcgi?cmd=Retrieve&amp;db=pubmed&amp;dopt=Abstract&amp;list_uids=27510965</a>  6 Biomedicine (Taipei) 6 3 Jun 2016 Journal Article |
| egfr  | mmp9   | <a href="http://www.ncbi.nlm.nih.gov/entrez/query.fcgi?cmd=Retrieve&amp;db=pubmed&amp;dopt=Abstract&amp;list_uids=27573547">http://www.ncbi.nlm.nih.gov/entrez/query.fcgi?cmd=Retrieve&amp;db=pubmed&amp;dopt=Abstract&amp;list_uids=27573547</a>  6 Int J Oncol 49 3 Sep 2016 Journal Article                                                                                                                                                                                                                                                                                                                |
| egfr  | ddx6   | <a href="http://www.ncbi.nlm.nih.gov/entrez/query.fcgi?cmd=Retrieve&amp;db=pubmed&amp;dopt=Abstract&amp;list_uids=27609774">http://www.ncbi.nlm.nih.gov/entrez/query.fcgi?cmd=Retrieve&amp;db=pubmed&amp;dopt=Abstract&amp;list_uids=27609774</a>  6 FASEB J  Sep 2016 JOURNAL ARTICLE                                                                                                                                                                                                                                                                                                                        |
| egf   | rela   | <a href="http://www.ncbi.nlm.nih.gov/entrez/query.fcgi?cmd=Retrieve&amp;db=pubmed&amp;dopt=Abstract&amp;list_uids=27470348">http://www.ncbi.nlm.nih.gov/entrez/query.fcgi?cmd=Retrieve&amp;db=pubmed&amp;dopt=Abstract&amp;list_uids=27470348</a>  6 Biomed Pharmacother 82  Aug 2016 Journal Article                                                                                                                                                                                                                                                                                                         |
| egf   | mmp2   | <a href="http://www.ncbi.nlm.nih.gov/entrez/query.fcgi?cmd=Retrieve&amp;db=pubmed&amp;dopt=Abstract&amp;list_uids=27470348">http://www.ncbi.nlm.nih.gov/entrez/query.fcgi?cmd=Retrieve&amp;db=pubmed&amp;dopt=Abstract&amp;list_uids=27470348</a>  6 Biomed Pharmacother 82  Aug 2016 Journal Article                                                                                                                                                                                                                                                                                                         |
| egf   | pcna   | <a href="http://www.ncbi.nlm.nih.gov/entrez/query.fcgi?cmd=Retrieve&amp;db=pubmed&amp;dopt=Abstract&amp;list_uids=27470348">http://www.ncbi.nlm.nih.gov/entrez/query.fcgi?cmd=Retrieve&amp;db=pubmed&amp;dopt=Abstract&amp;list_uids=27470348</a>  6 Biomed Pharmacother 82  Aug 2016 Journal Article                                                                                                                                                                                                                                                                                                         |
| egf   | bcl2   | <a href="http://www.ncbi.nlm.nih.gov/entrez/query.fcgi?cmd=Retrieve&amp;db=pubmed&amp;dopt=Abstract&amp;list_uids=27470348">http://www.ncbi.nlm.nih.gov/entrez/query.fcgi?cmd=Retrieve&amp;db=pubmed&amp;dopt=Abstract&amp;list_uids=27470348</a>  6 Biomed Pharmacother 82  Aug 2016 Journal Article                                                                                                                                                                                                                                                                                                         |
| egf   | ptk2   | <a href="http://www.ncbi.nlm.nih.gov/entrez/query.fcgi?cmd=Retrieve&amp;db=pubmed&amp;dopt=Abstract&amp;list_uids=27573547">http://www.ncbi.nlm.nih.gov/entrez/query.fcgi?cmd=Retrieve&amp;db=pubmed&amp;dopt=Abstract&amp;list_uids=27573547</a>  6 Int J Oncol 49 3 Sep 2016 Journal Article                                                                                                                                                                                                                                                                                                                |
| egf   | mmp9   | <a href="http://www.ncbi.nlm.nih.gov/entrez/query.fcgi?cmd=Retrieve&amp;db=pubmed&amp;dopt=Abstract&amp;list_uids=27470348">http://www.ncbi.nlm.nih.gov/entrez/query.fcgi?cmd=Retrieve&amp;db=pubmed&amp;dopt=Abstract&amp;list_uids=27470348</a>  6 Biomed Pharmacother 82  Aug 2016 Journal Article  <a href="http://www.ncbi.nlm.nih.gov/entrez/query.fcgi?cmd=Retrieve&amp;db=pubmed&amp;dopt=Abstract&amp;list_uids=27573547">http://www.ncbi.nlm.nih.gov/entrez/query.fcgi?cmd=Retrieve&amp;db=pubmed&amp;dopt=Abstract&amp;list_uids=27573547</a>  6 Int J Oncol 49 3 Sep 2016 Journal Article         |

|       |       |                                                                                                                                                                                                                                                                                                                                                                                                                                                                                                                                                                                                                                                                                                                                                                                                                                                                                                                                                                                                                                                                                                                                                                                                   |
|-------|-------|---------------------------------------------------------------------------------------------------------------------------------------------------------------------------------------------------------------------------------------------------------------------------------------------------------------------------------------------------------------------------------------------------------------------------------------------------------------------------------------------------------------------------------------------------------------------------------------------------------------------------------------------------------------------------------------------------------------------------------------------------------------------------------------------------------------------------------------------------------------------------------------------------------------------------------------------------------------------------------------------------------------------------------------------------------------------------------------------------------------------------------------------------------------------------------------------------|
| egf   | egfr  | <a href="http://www.ncbi.nlm.nih.gov/entrez/query.fcgi?cmd=Retrieve&amp;db=pubmed&amp;dopt=Abstract&amp;list_uids=27609774">http://www.ncbi.nlm.nih.gov/entrez/query.fcgi?cmd=Retrieve&amp;db=pubmed&amp;dopt=Abstract&amp;list_uids=27609774</a>  6 FASEB J  Sep 2016 JOURNAL ARTICLE  <a href="http://www.ncbi.nlm.nih.gov/entrez/query.fcgi?cmd=Retrieve&amp;db=pubmed&amp;dopt=Abstract&amp;list_uids=27286795">http://www.ncbi.nlm.nih.gov/entrez/query.fcgi?cmd=Retrieve&amp;db=pubmed&amp;dopt=Abstract&amp;list_uids=27286795</a>  6 Neuro Oncol  Jun 2016 JOURNAL ARTICLE  <a href="http://www.ncbi.nlm.nih.gov/entrez/query.fcgi?cmd=Retrieve&amp;db=pubmed&amp;dopt=Abstract&amp;list_uids=27452449">http://www.ncbi.nlm.nih.gov/entrez/query.fcgi?cmd=Retrieve&amp;db=pubmed&amp;dopt=Abstract&amp;list_uids=27452449</a>  6 Cell Transplant  Jul 2016 JOURNAL ARTICLE                                                                                                                                                                                                                                                                                                                |
| cd34  | tfpi  | <a href="http://www.ncbi.nlm.nih.gov/entrez/query.fcgi?cmd=Retrieve&amp;db=pubmed&amp;dopt=Abstract&amp;list_uids=27352134">http://www.ncbi.nlm.nih.gov/entrez/query.fcgi?cmd=Retrieve&amp;db=pubmed&amp;dopt=Abstract&amp;list_uids=27352134</a>  6 PLoS One 11 6  2016 Journal Article                                                                                                                                                                                                                                                                                                                                                                                                                                                                                                                                                                                                                                                                                                                                                                                                                                                                                                          |
| prom1 | cd34  | <a href="http://www.ncbi.nlm.nih.gov/entrez/query.fcgi?cmd=Retrieve&amp;db=pubmed&amp;dopt=Abstract&amp;list_uids=27288104">http://www.ncbi.nlm.nih.gov/entrez/query.fcgi?cmd=Retrieve&amp;db=pubmed&amp;dopt=Abstract&amp;list_uids=27288104</a>  6 J Vasc Surg  Jun 2016 JOURNAL ARTICLE                                                                                                                                                                                                                                                                                                                                                                                                                                                                                                                                                                                                                                                                                                                                                                                                                                                                                                        |
| prom1 | stat6 | <a href="http://www.ncbi.nlm.nih.gov/entrez/query.fcgi?cmd=Retrieve&amp;db=pubmed&amp;dopt=Abstract&amp;list_uids=27533463">http://www.ncbi.nlm.nih.gov/entrez/query.fcgi?cmd=Retrieve&amp;db=pubmed&amp;dopt=Abstract&amp;list_uids=27533463</a>  6 Oncotarget  Aug 2016 JOURNAL ARTICLE                                                                                                                                                                                                                                                                                                                                                                                                                                                                                                                                                                                                                                                                                                                                                                                                                                                                                                         |
| prom1 | alcam | <a href="http://www.ncbi.nlm.nih.gov/entrez/query.fcgi?cmd=Retrieve&amp;db=pubmed&amp;dopt=Abstract&amp;list_uids=27533463">http://www.ncbi.nlm.nih.gov/entrez/query.fcgi?cmd=Retrieve&amp;db=pubmed&amp;dopt=Abstract&amp;list_uids=27533463</a>  6 Oncotarget  Aug 2016 JOURNAL ARTICLE                                                                                                                                                                                                                                                                                                                                                                                                                                                                                                                                                                                                                                                                                                                                                                                                                                                                                                         |
| kdr   | cd34  | <a href="http://www.ncbi.nlm.nih.gov/entrez/query.fcgi?cmd=Retrieve&amp;db=pubmed&amp;dopt=Abstract&amp;list_uids=27288104">http://www.ncbi.nlm.nih.gov/entrez/query.fcgi?cmd=Retrieve&amp;db=pubmed&amp;dopt=Abstract&amp;list_uids=27288104</a>  6 J Vasc Surg  Jun 2016 JOURNAL ARTICLE                                                                                                                                                                                                                                                                                                                                                                                                                                                                                                                                                                                                                                                                                                                                                                                                                                                                                                        |
| kdr   | prom1 | <a href="http://www.ncbi.nlm.nih.gov/entrez/query.fcgi?cmd=Retrieve&amp;db=pubmed&amp;dopt=Abstract&amp;list_uids=27288104">http://www.ncbi.nlm.nih.gov/entrez/query.fcgi?cmd=Retrieve&amp;db=pubmed&amp;dopt=Abstract&amp;list_uids=27288104</a>  6 J Vasc Surg  Jun 2016 JOURNAL ARTICLE                                                                                                                                                                                                                                                                                                                                                                                                                                                                                                                                                                                                                                                                                                                                                                                                                                                                                                        |
| kdr   | ros1  | <a href="http://www.ncbi.nlm.nih.gov/entrez/query.fcgi?cmd=Retrieve&amp;db=pubmed&amp;dopt=Abstract&amp;list_uids=27498749">http://www.ncbi.nlm.nih.gov/entrez/query.fcgi?cmd=Retrieve&amp;db=pubmed&amp;dopt=Abstract&amp;list_uids=27498749</a>  6 Int J Oncol  Aug 2016 JOURNAL ARTICLE                                                                                                                                                                                                                                                                                                                                                                                                                                                                                                                                                                                                                                                                                                                                                                                                                                                                                                        |
| kdr   | lect2 | <a href="http://www.ncbi.nlm.nih.gov/entrez/query.fcgi?cmd=Retrieve&amp;db=pubmed&amp;dopt=Abstract&amp;list_uids=27507763">http://www.ncbi.nlm.nih.gov/entrez/query.fcgi?cmd=Retrieve&amp;db=pubmed&amp;dopt=Abstract&amp;list_uids=27507763</a>  6 Sci Rep 6  2016 Journal Article                                                                                                                                                                                                                                                                                                                                                                                                                                                                                                                                                                                                                                                                                                                                                                                                                                                                                                              |
| kdr   | vegfa | <a href="http://www.ncbi.nlm.nih.gov/entrez/query.fcgi?cmd=Retrieve&amp;db=pubmed&amp;dopt=Abstract&amp;list_uids=27569654">http://www.ncbi.nlm.nih.gov/entrez/query.fcgi?cmd=Retrieve&amp;db=pubmed&amp;dopt=Abstract&amp;list_uids=27569654</a>  6 Cancer Lett 382 1 Aug 2016 JOURNAL ARTICLE  <a href="http://www.ncbi.nlm.nih.gov/entrez/query.fcgi?cmd=Retrieve&amp;db=pubmed&amp;dopt=Abstract&amp;list_uids=27297262">http://www.ncbi.nlm.nih.gov/entrez/query.fcgi?cmd=Retrieve&amp;db=pubmed&amp;dopt=Abstract&amp;list_uids=27297262</a>  6 Clin Exp Pharmacol Physiol 43 10 Oct 2016 Journal Article  <a href="http://www.ncbi.nlm.nih.gov/entrez/query.fcgi?cmd=Retrieve&amp;db=pubmed&amp;dopt=Abstract&amp;list_uids=27498749">http://www.ncbi.nlm.nih.gov/entrez/query.fcgi?cmd=Retrieve&amp;db=pubmed&amp;dopt=Abstract&amp;list_uids=27498749</a>  6 Int J Oncol  Aug 2016 JOURNAL ARTICLE  <a href="http://www.ncbi.nlm.nih.gov/entrez/query.fcgi?cmd=Retrieve&amp;db=pubmed&amp;dopt=Abstract&amp;list_uids=27507763">http://www.ncbi.nlm.nih.gov/entrez/query.fcgi?cmd=Retrieve&amp;db=pubmed&amp;dopt=Abstract&amp;list_uids=27507763</a>  6 Sci Rep 6  2016 Journal Article |
| kdr   | ephb2 | <a href="http://www.ncbi.nlm.nih.gov/entrez/query.fcgi?cmd=Retrieve&amp;db=pubmed&amp;dopt=Abstract&amp;list_uids=27569654">http://www.ncbi.nlm.nih.gov/entrez/query.fcgi?cmd=Retrieve&amp;db=pubmed&amp;dopt=Abstract&amp;list_uids=27569654</a>  6 Cancer Lett 382 1 Aug 2016 JOURNAL ARTICLE  <a href="http://www.ncbi.nlm.nih.gov/entrez/query.fcgi?cmd=Retrieve&amp;db=pubmed&amp;dopt=Abstract&amp;list_uids=27572273">http://www.ncbi.nlm.nih.gov/entrez/query.fcgi?cmd=Retrieve&amp;db=pubmed&amp;dopt=Abstract&amp;list_uids=27572273</a>  6 Int J Oncol 49 3 Sep 2016 Journal Article                                                                                                                                                                                                                                                                                                                                                                                                                                                                                                                                                                                                   |
| kdr   | zhx2  | <a href="http://www.ncbi.nlm.nih.gov/entrez/query.fcgi?cmd=Retrieve&amp;db=pubmed&amp;dopt=Abstract&amp;list_uids=27572273">http://www.ncbi.nlm.nih.gov/entrez/query.fcgi?cmd=Retrieve&amp;db=pubmed&amp;dopt=Abstract&amp;list_uids=27572273</a>  6 Int J Oncol 49 3 Sep 2016 Journal Article                                                                                                                                                                                                                                                                                                                                                                                                                                                                                                                                                                                                                                                                                                                                                                                                                                                                                                    |



|       |         |                                                                                                                                                                                                                                                                                                                                                                                                                                                                                                                                                                                                                 |
|-------|---------|-----------------------------------------------------------------------------------------------------------------------------------------------------------------------------------------------------------------------------------------------------------------------------------------------------------------------------------------------------------------------------------------------------------------------------------------------------------------------------------------------------------------------------------------------------------------------------------------------------------------|
| kdr   | akt1    | <a href="http://www.ncbi.nlm.nih.gov/entrez/query.fcgi?cmd=Retrieve&amp;db=pubmed&amp;dopt=Abstract&amp;list_uids=27572273">http://www.ncbi.nlm.nih.gov/entrez/query.fcgi?cmd=Retrieve&amp;db=pubmed&amp;dopt=Abstract&amp;list_uids=27572273</a>  6 Int J Oncol 49 3 Sep 2016 Journal Article  <a href="http://www.ncbi.nlm.nih.gov/entrez/query.fcgi?cmd=Retrieve&amp;db=pubmed&amp;dopt=Abstract&amp;list_uids=27297262">http://www.ncbi.nlm.nih.gov/entrez/query.fcgi?cmd=Retrieve&amp;db=pubmed&amp;dopt=Abstract&amp;list_uids=27297262</a>  6 Cl in Exp Pharmacol Physiol 43 10 Oct 2016 Journal Article |
| kdr   | pik3ca  | <a href="http://www.ncbi.nlm.nih.gov/entrez/query.fcgi?cmd=Retrieve&amp;db=pubmed&amp;dopt=Abstract&amp;list_uids=27572273">http://www.ncbi.nlm.nih.gov/entrez/query.fcgi?cmd=Retrieve&amp;db=pubmed&amp;dopt=Abstract&amp;list_uids=27572273</a>  6 Int J Oncol 49 3 Sep 2016 Journal Article                                                                                                                                                                                                                                                                                                                  |
| parp1 | cd34    | <a href="http://www.ncbi.nlm.nih.gov/entrez/query.fcgi?cmd=Retrieve&amp;db=pubmed&amp;dopt=Abstract&amp;list_uids=27288104">http://www.ncbi.nlm.nih.gov/entrez/query.fcgi?cmd=Retrieve&amp;db=pubmed&amp;dopt=Abstract&amp;list_uids=27288104</a>  6 J Vasc Surg  Jun 2016 JOURNAL ARTICLE                                                                                                                                                                                                                                                                                                                      |
| parp1 | prom1   | <a href="http://www.ncbi.nlm.nih.gov/entrez/query.fcgi?cmd=Retrieve&amp;db=pubmed&amp;dopt=Abstract&amp;list_uids=27288104">http://www.ncbi.nlm.nih.gov/entrez/query.fcgi?cmd=Retrieve&amp;db=pubmed&amp;dopt=Abstract&amp;list_uids=27288104</a>  6 J Vasc Surg  Jun 2016 JOURNAL ARTICLE                                                                                                                                                                                                                                                                                                                      |
| parp1 | kdr     | <a href="http://www.ncbi.nlm.nih.gov/entrez/query.fcgi?cmd=Retrieve&amp;db=pubmed&amp;dopt=Abstract&amp;list_uids=27288104">http://www.ncbi.nlm.nih.gov/entrez/query.fcgi?cmd=Retrieve&amp;db=pubmed&amp;dopt=Abstract&amp;list_uids=27288104</a>  6 J Vasc Surg  Jun 2016 JOURNAL ARTICLE                                                                                                                                                                                                                                                                                                                      |
| parp1 | bcl2l1  | <a href="http://www.ncbi.nlm.nih.gov/entrez/query.fcgi?cmd=Retrieve&amp;db=pubmed&amp;dopt=Abstract&amp;list_uids=27415751">http://www.ncbi.nlm.nih.gov/entrez/query.fcgi?cmd=Retrieve&amp;db=pubmed&amp;dopt=Abstract&amp;list_uids=27415751</a>  6 Cancer Biol Ther  Jul 2016 JOURNAL ARTICLE                                                                                                                                                                                                                                                                                                                 |
| parp1 | dym     | <a href="http://www.ncbi.nlm.nih.gov/entrez/query.fcgi?cmd=Retrieve&amp;db=pubmed&amp;dopt=Abstract&amp;list_uids=27614381">http://www.ncbi.nlm.nih.gov/entrez/query.fcgi?cmd=Retrieve&amp;db=pubmed&amp;dopt=Abstract&amp;list_uids=27614381</a>  6 Med Sci Monit 22  JOURNAL ARTICLE                                                                                                                                                                                                                                                                                                                          |
| stim1 | 3.6.1.8 | <a href="http://www.ncbi.nlm.nih.gov/entrez/query.fcgi?cmd=Retrieve&amp;db=pubmed&amp;dopt=Abstract&amp;list_uids=27291153">http://www.ncbi.nlm.nih.gov/entrez/query.fcgi?cmd=Retrieve&amp;db=pubmed&amp;dopt=Abstract&amp;list_uids=27291153</a>  6 Biochem Biophys Res Commun 477 1 Aug 2016 Journal Article                                                                                                                                                                                                                                                                                                  |
| stim1 | macc1   | <a href="http://www.ncbi.nlm.nih.gov/entrez/query.fcgi?cmd=Retrieve&amp;db=pubmed&amp;dopt=Abstract&amp;list_uids=27431311">http://www.ncbi.nlm.nih.gov/entrez/query.fcgi?cmd=Retrieve&amp;db=pubmed&amp;dopt=Abstract&amp;list_uids=27431311</a>  6 Cancer Lett 381 1 Oct 2016 Journal Article                                                                                                                                                                                                                                                                                                                 |
| orai1 | 3.6.1.8 | <a href="http://www.ncbi.nlm.nih.gov/entrez/query.fcgi?cmd=Retrieve&amp;db=pubmed&amp;dopt=Abstract&amp;list_uids=27291153">http://www.ncbi.nlm.nih.gov/entrez/query.fcgi?cmd=Retrieve&amp;db=pubmed&amp;dopt=Abstract&amp;list_uids=27291153</a>  6 Biochem Biophys Res Commun 477 1 Aug 2016 Journal Article                                                                                                                                                                                                                                                                                                  |
| orai1 | macc1   | <a href="http://www.ncbi.nlm.nih.gov/entrez/query.fcgi?cmd=Retrieve&amp;db=pubmed&amp;dopt=Abstract&amp;list_uids=27431311">http://www.ncbi.nlm.nih.gov/entrez/query.fcgi?cmd=Retrieve&amp;db=pubmed&amp;dopt=Abstract&amp;list_uids=27431311</a>  6 Cancer Lett 381 1 Oct 2016 Journal Article                                                                                                                                                                                                                                                                                                                 |
| orai1 | stim1   | <a href="http://www.ncbi.nlm.nih.gov/entrez/query.fcgi?cmd=Retrieve&amp;db=pubmed&amp;dopt=Abstract&amp;list_uids=27291153">http://www.ncbi.nlm.nih.gov/entrez/query.fcgi?cmd=Retrieve&amp;db=pubmed&amp;dopt=Abstract&amp;list_uids=27291153</a>  6 Biochem Biophys Res Commun 477 1 Aug 2016 Journal Article  <a href="http://www.ncbi.nlm.nih.gov/entrez/query.fcgi?cmd=Retrieve&amp;db=pubmed&amp;dopt=Abstract&amp;list_uids=27431311">http://www.ncbi.nlm.nih.gov/entrez/query.fcgi?cmd=Retrieve&amp;db=pubmed&amp;dopt=Abstract&amp;list_uids=27431311</a>  6 Cancer Lett 381 1 Oct 2016 Journal Article |
| rhd   | 3.6.1.8 | <a href="http://www.ncbi.nlm.nih.gov/entrez/query.fcgi?cmd=Retrieve&amp;db=pubmed&amp;dopt=Abstract&amp;list_uids=27291153">http://www.ncbi.nlm.nih.gov/entrez/query.fcgi?cmd=Retrieve&amp;db=pubmed&amp;dopt=Abstract&amp;list_uids=27291153</a>  6 Biochem Biophys Res Commun 477 1 Aug 2016 Journal Article                                                                                                                                                                                                                                                                                                  |
| rhd   | stim1   | <a href="http://www.ncbi.nlm.nih.gov/entrez/query.fcgi?cmd=Retrieve&amp;db=pubmed&amp;dopt=Abstract&amp;list_uids=27291153">http://www.ncbi.nlm.nih.gov/entrez/query.fcgi?cmd=Retrieve&amp;db=pubmed&amp;dopt=Abstract&amp;list_uids=27291153</a>  6 Biochem Biophys Res Commun 477 1 Aug 2016 Journal Article                                                                                                                                                                                                                                                                                                  |
| rhd   | orai1   | <a href="http://www.ncbi.nlm.nih.gov/entrez/query.fcgi?cmd=Retrieve&amp;db=pubmed&amp;dopt=Abstract&amp;list_uids=27291153">http://www.ncbi.nlm.nih.gov/entrez/query.fcgi?cmd=Retrieve&amp;db=pubmed&amp;dopt=Abstract&amp;list_uids=27291153</a>  6 Biochem Biophys Res Commun 477 1 Aug 2016 Journal Article                                                                                                                                                                                                                                                                                                  |
| actin | hcc     | <a href="http://www.ncbi.nlm.nih.gov/entrez/query.fcgi?cmd=Retrieve&amp;db=pubmed&amp;dopt=Abstract&amp;list_uids=27459117">http://www.ncbi.nlm.nih.gov/entrez/query.fcgi?cmd=Retrieve&amp;db=pubmed&amp;dopt=Abstract&amp;list_uids=27459117</a>  6 Biomed Pharmacother 83 Jul 2016 JOURNAL ARTICLE                                                                                                                                                                                                                                                                                                            |

|       |         |                                                                                                                                                                                                                                                                                                                                                                                                                                                                                                                                                                                           |
|-------|---------|-------------------------------------------------------------------------------------------------------------------------------------------------------------------------------------------------------------------------------------------------------------------------------------------------------------------------------------------------------------------------------------------------------------------------------------------------------------------------------------------------------------------------------------------------------------------------------------------|
| actin | id1     | <a href="http://www.ncbi.nlm.nih.gov/entrez/query.fcgi?cmd=Retrieve&amp;db=pubmed&amp;dopt=Abstract&amp;list_uids=27459117">http://www.ncbi.nlm.nih.gov/entrez/query.fcgi?cmd=Retrieve&amp;db=pubmed&amp;dopt=Abstract&amp;list_uids=27459117</a>  6 Biomed Pharmacother 83  Jul 2016 JOURNAL ARTICLE                                                                                                                                                                                                                                                                                     |
| actin | pfn1    | <a href="http://www.ncbi.nlm.nih.gov/entrez/query.fcgi?cmd=Retrieve&amp;db=pubmed&amp;dopt=Abstract&amp;list_uids=27494863">http://www.ncbi.nlm.nih.gov/entrez/query.fcgi?cmd=Retrieve&amp;db=pubmed&amp;dopt=Abstract&amp;list_uids=27494863</a>  6 Oncotarget  Aug 2016 JOURNAL ARTICLE                                                                                                                                                                                                                                                                                                 |
| actin | ppa1    | <a href="http://www.ncbi.nlm.nih.gov/entrez/query.fcgi?cmd=Retrieve&amp;db=pubmed&amp;dopt=Abstract&amp;list_uids=27608898">http://www.ncbi.nlm.nih.gov/entrez/query.fcgi?cmd=Retrieve&amp;db=pubmed&amp;dopt=Abstract&amp;list_uids=27608898</a>  6 Eur Rev Med Pharmacol Sci 20 16 Aug 2016 Journal Article                                                                                                                                                                                                                                                                             |
| actin | phactr4 | <a href="http://www.ncbi.nlm.nih.gov/entrez/query.fcgi?cmd=Retrieve&amp;db=pubmed&amp;dopt=Abstract&amp;list_uids=27608898">http://www.ncbi.nlm.nih.gov/entrez/query.fcgi?cmd=Retrieve&amp;db=pubmed&amp;dopt=Abstract&amp;list_uids=27608898</a>  6 Eur Rev Med Pharmacol Sci 20 16 Aug 2016 Journal Article                                                                                                                                                                                                                                                                             |
| trpv4 | actin   | <a href="http://www.ncbi.nlm.nih.gov/entrez/query.fcgi?cmd=Retrieve&amp;db=pubmed&amp;dopt=Abstract&amp;list_uids=27291497">http://www.ncbi.nlm.nih.gov/entrez/query.fcgi?cmd=Retrieve&amp;db=pubmed&amp;dopt=Abstract&amp;list_uids=27291497</a>  6 Sci Rep 6  2016 Journal Article                                                                                                                                                                                                                                                                                                      |
| smad2 | hcc     | <a href="http://www.ncbi.nlm.nih.gov/entrez/query.fcgi?cmd=Retrieve&amp;db=pubmed&amp;dopt=Abstract&amp;list_uids=27292026">http://www.ncbi.nlm.nih.gov/entrez/query.fcgi?cmd=Retrieve&amp;db=pubmed&amp;dopt=Abstract&amp;list_uids=27292026</a>  6 Neoplasia a 18 6 Jun 2016 Journal Article                                                                                                                                                                                                                                                                                            |
| smad2 | stat3   | <a href="http://www.ncbi.nlm.nih.gov/entrez/query.fcgi?cmd=Retrieve&amp;db=pubmed&amp;dopt=Abstract&amp;list_uids=27292026">http://www.ncbi.nlm.nih.gov/entrez/query.fcgi?cmd=Retrieve&amp;db=pubmed&amp;dopt=Abstract&amp;list_uids=27292026</a>  6 Neoplasia a 18 6 Jun 2016 Journal Article                                                                                                                                                                                                                                                                                            |
| smad2 | jak1    | <a href="http://www.ncbi.nlm.nih.gov/entrez/query.fcgi?cmd=Retrieve&amp;db=pubmed&amp;dopt=Abstract&amp;list_uids=27292026">http://www.ncbi.nlm.nih.gov/entrez/query.fcgi?cmd=Retrieve&amp;db=pubmed&amp;dopt=Abstract&amp;list_uids=27292026</a>  6 Neoplasia a 18 6 Jun 2016 Journal Article                                                                                                                                                                                                                                                                                            |
| smad2 | kitlg   | <a href="http://www.ncbi.nlm.nih.gov/entrez/query.fcgi?cmd=Retrieve&amp;db=pubmed&amp;dopt=Abstract&amp;list_uids=27292026">http://www.ncbi.nlm.nih.gov/entrez/query.fcgi?cmd=Retrieve&amp;db=pubmed&amp;dopt=Abstract&amp;list_uids=27292026</a>  6 Neoplasia a 18 6 Jun 2016 Journal Article                                                                                                                                                                                                                                                                                            |
| smad2 | tnfsf13 | <a href="http://www.ncbi.nlm.nih.gov/entrez/query.fcgi?cmd=Retrieve&amp;db=pubmed&amp;dopt=Abstract&amp;list_uids=27292026">http://www.ncbi.nlm.nih.gov/entrez/query.fcgi?cmd=Retrieve&amp;db=pubmed&amp;dopt=Abstract&amp;list_uids=27292026</a>  6 Neoplasia a 18 6 Jun 2016 Journal Article                                                                                                                                                                                                                                                                                            |
| smad2 | timp3   | <a href="http://www.ncbi.nlm.nih.gov/entrez/query.fcgi?cmd=Retrieve&amp;db=pubmed&amp;dopt=Abstract&amp;list_uids=27383203">http://www.ncbi.nlm.nih.gov/entrez/query.fcgi?cmd=Retrieve&amp;db=pubmed&amp;dopt=Abstract&amp;list_uids=27383203</a>  6 Cell Physiol Biochem 39 2  2016 Journal Article                                                                                                                                                                                                                                                                                      |
| smad2 | ski     | <a href="http://www.ncbi.nlm.nih.gov/entrez/query.fcgi?cmd=Retrieve&amp;db=pubmed&amp;dopt=Abstract&amp;list_uids=27473823">http://www.ncbi.nlm.nih.gov/entrez/query.fcgi?cmd=Retrieve&amp;db=pubmed&amp;dopt=Abstract&amp;list_uids=27473823</a>  6 Cancer Lett 381 1 Oct 2016 Journal Article                                                                                                                                                                                                                                                                                           |
| smad2 | snord87 | <a href="http://www.ncbi.nlm.nih.gov/entrez/query.fcgi?cmd=Retrieve&amp;db=pubmed&amp;dopt=Abstract&amp;list_uids=27574009">http://www.ncbi.nlm.nih.gov/entrez/query.fcgi?cmd=Retrieve&amp;db=pubmed&amp;dopt=Abstract&amp;list_uids=27574009</a>  6 Oncol Rep  Aug 2016 JOURNAL ARTICLE                                                                                                                                                                                                                                                                                                  |
| smad2 | smad7   | <a href="http://www.ncbi.nlm.nih.gov/entrez/query.fcgi?cmd=Retrieve&amp;db=pubmed&amp;dopt=Abstract&amp;list_uids=27473823">http://www.ncbi.nlm.nih.gov/entrez/query.fcgi?cmd=Retrieve&amp;db=pubmed&amp;dopt=Abstract&amp;list_uids=27473823</a>  6 Cancer Lett 381 1 Oct 2016 Journal Article  <a href="http://www.ncbi.nlm.nih.gov/entrez/query.fcgi?cmd=Retrieve&amp;db=pubmed&amp;dopt=Abstract&amp;list_uids=27574009">http://www.ncbi.nlm.nih.gov/entrez/query.fcgi?cmd=Retrieve&amp;db=pubmed&amp;dopt=Abstract&amp;list_uids=27574009</a>  6 Oncol Rep  Aug 2016 JOURNAL ARTICLE |
| kitlg | hcc     | <a href="http://www.ncbi.nlm.nih.gov/entrez/query.fcgi?cmd=Retrieve&amp;db=pubmed&amp;dopt=Abstract&amp;list_uids=27292026">http://www.ncbi.nlm.nih.gov/entrez/query.fcgi?cmd=Retrieve&amp;db=pubmed&amp;dopt=Abstract&amp;list_uids=27292026</a>  6 Neoplasia a 18 6 Jun 2016 Journal Article                                                                                                                                                                                                                                                                                            |
| kitlg | stat3   | <a href="http://www.ncbi.nlm.nih.gov/entrez/query.fcgi?cmd=Retrieve&amp;db=pubmed&amp;dopt=Abstract&amp;list_uids=27292026">http://www.ncbi.nlm.nih.gov/entrez/query.fcgi?cmd=Retrieve&amp;db=pubmed&amp;dopt=Abstract&amp;list_uids=27292026</a>  6 Neoplasia a 18 6 Jun 2016 Journal Article                                                                                                                                                                                                                                                                                            |
| kitlg | jak1    | <a href="http://www.ncbi.nlm.nih.gov/entrez/query.fcgi?cmd=Retrieve&amp;db=pubmed&amp;dopt=Abstract&amp;list_uids=27292026">http://www.ncbi.nlm.nih.gov/entrez/query.fcgi?cmd=Retrieve&amp;db=pubmed&amp;dopt=Abstract&amp;list_uids=27292026</a>  6 Neoplasia a 18 6 Jun 2016 Journal Article                                                                                                                                                                                                                                                                                            |

|         |       |                                                                                                                                                                                                                                                                                                     |
|---------|-------|-----------------------------------------------------------------------------------------------------------------------------------------------------------------------------------------------------------------------------------------------------------------------------------------------------|
| tnfsf13 | stat3 | <a href="http://www.ncbi.nlm.nih.gov/entrez/query.fcgi?cmd=Retrieve&amp;db=pubmed&amp;dopt=Abstract&amp;list_uids=27292026">http://www.ncbi.nlm.nih.gov/entrez/query.fcgi?cmd=Retrieve&amp;db=pubmed&amp;dopt=Abstract&amp;list_uids=27292026</a>  6 Neoplasia 18 6 Jun 2016 Journal Article        |
| tnfsf13 | jak1  | <a href="http://www.ncbi.nlm.nih.gov/entrez/query.fcgi?cmd=Retrieve&amp;db=pubmed&amp;dopt=Abstract&amp;list_uids=27292026">http://www.ncbi.nlm.nih.gov/entrez/query.fcgi?cmd=Retrieve&amp;db=pubmed&amp;dopt=Abstract&amp;list_uids=27292026</a>  6 Neoplasia 18 6 Jun 2016 Journal Article        |
| tnfsf13 | kitlg | <a href="http://www.ncbi.nlm.nih.gov/entrez/query.fcgi?cmd=Retrieve&amp;db=pubmed&amp;dopt=Abstract&amp;list_uids=27292026">http://www.ncbi.nlm.nih.gov/entrez/query.fcgi?cmd=Retrieve&amp;db=pubmed&amp;dopt=Abstract&amp;list_uids=27292026</a>  6 Neoplasia 18 6 Jun 2016 Journal Article        |
| tnfsf13 | scaf1 | <a href="http://www.ncbi.nlm.nih.gov/entrez/query.fcgi?cmd=Retrieve&amp;db=pubmed&amp;dopt=Abstract&amp;list_uids=27367025">http://www.ncbi.nlm.nih.gov/entrez/query.fcgi?cmd=Retrieve&amp;db=pubmed&amp;dopt=Abstract&amp;list_uids=27367025</a>  6 Oncotarget  Jun 2016 JOURNAL ARTICLE           |
| tnfsf13 | mmp9  | <a href="http://www.ncbi.nlm.nih.gov/entrez/query.fcgi?cmd=Retrieve&amp;db=pubmed&amp;dopt=Abstract&amp;list_uids=27452283">http://www.ncbi.nlm.nih.gov/entrez/query.fcgi?cmd=Retrieve&amp;db=pubmed&amp;dopt=Abstract&amp;list_uids=27452283</a>  6 Bioorg Med Chem 24 18 Sep 2016 Journal Article |
| tnfsf13 | mmp2  | <a href="http://www.ncbi.nlm.nih.gov/entrez/query.fcgi?cmd=Retrieve&amp;db=pubmed&amp;dopt=Abstract&amp;list_uids=27452283">http://www.ncbi.nlm.nih.gov/entrez/query.fcgi?cmd=Retrieve&amp;db=pubmed&amp;dopt=Abstract&amp;list_uids=27452283</a>  6 Bioorg Med Chem 24 18 Sep 2016 Journal Article |
| tnfsf13 | tek   | <a href="http://www.ncbi.nlm.nih.gov/entrez/query.fcgi?cmd=Retrieve&amp;db=pubmed&amp;dopt=Abstract&amp;list_uids=27519652">http://www.ncbi.nlm.nih.gov/entrez/query.fcgi?cmd=Retrieve&amp;db=pubmed&amp;dopt=Abstract&amp;list_uids=27519652</a>  6 J Invest Dermatol  Aug 2016 JOURNAL ARTICLE    |
| tnfsf13 | darc  | <a href="http://www.ncbi.nlm.nih.gov/entrez/query.fcgi?cmd=Retrieve&amp;db=pubmed&amp;dopt=Abstract&amp;list_uids=27555313">http://www.ncbi.nlm.nih.gov/entrez/query.fcgi?cmd=Retrieve&amp;db=pubmed&amp;dopt=Abstract&amp;list_uids=27555313</a>  6 MBio 7 4 2016 Journal Article                  |
| tnfsf13 | il6   | <a href="http://www.ncbi.nlm.nih.gov/entrez/query.fcgi?cmd=Retrieve&amp;db=pubmed&amp;dopt=Abstract&amp;list_uids=27558278">http://www.ncbi.nlm.nih.gov/entrez/query.fcgi?cmd=Retrieve&amp;db=pubmed&amp;dopt=Abstract&amp;list_uids=27558278</a>  6 J Periodontal Res  Aug 2016 JOURNAL ARTICLE    |
| tnfsf13 | il8   | <a href="http://www.ncbi.nlm.nih.gov/entrez/query.fcgi?cmd=Retrieve&amp;db=pubmed&amp;dopt=Abstract&amp;list_uids=27558278">http://www.ncbi.nlm.nih.gov/entrez/query.fcgi?cmd=Retrieve&amp;db=pubmed&amp;dopt=Abstract&amp;list_uids=27558278</a>  6 J Periodontal Res  Aug 2016 JOURNAL ARTICLE    |
| tnfsf13 | ccl20 | <a href="http://www.ncbi.nlm.nih.gov/entrez/query.fcgi?cmd=Retrieve&amp;db=pubmed&amp;dopt=Abstract&amp;list_uids=27558278">http://www.ncbi.nlm.nih.gov/entrez/query.fcgi?cmd=Retrieve&amp;db=pubmed&amp;dopt=Abstract&amp;list_uids=27558278</a>  6 J Periodontal Res  Aug 2016 JOURNAL ARTICLE    |
| soat1   | stat3 | <a href="http://www.ncbi.nlm.nih.gov/entrez/query.fcgi?cmd=Retrieve&amp;db=pubmed&amp;dopt=Abstract&amp;list_uids=27292260">http://www.ncbi.nlm.nih.gov/entrez/query.fcgi?cmd=Retrieve&amp;db=pubmed&amp;dopt=Abstract&amp;list_uids=27292260</a>  6 Oncogene  Jun 2016 JOURNAL ARTICLE             |
| myst1   | itk   | <a href="http://www.ncbi.nlm.nih.gov/entrez/query.fcgi?cmd=Retrieve&amp;db=pubmed&amp;dopt=Abstract&amp;list_uids=27292636">http://www.ncbi.nlm.nih.gov/entrez/query.fcgi?cmd=Retrieve&amp;db=pubmed&amp;dopt=Abstract&amp;list_uids=27292636</a>  6 Cell Rep 15 12 Jun 2016 Journal Article        |
| myst1   | aof2  | <a href="http://www.ncbi.nlm.nih.gov/entrez/query.fcgi?cmd=Retrieve&amp;db=pubmed&amp;dopt=Abstract&amp;list_uids=27292636">http://www.ncbi.nlm.nih.gov/entrez/query.fcgi?cmd=Retrieve&amp;db=pubmed&amp;dopt=Abstract&amp;list_uids=27292636</a>  6 Cell Rep 15 12 Jun 2016 Journal Article        |
| yap1    | smad2 | <a href="http://www.ncbi.nlm.nih.gov/entrez/query.fcgi?cmd=Retrieve&amp;db=pubmed&amp;dopt=Abstract&amp;list_uids=27292796">http://www.ncbi.nlm.nih.gov/entrez/query.fcgi?cmd=Retrieve&amp;db=pubmed&amp;dopt=Abstract&amp;list_uids=27292796</a>  6 Mol Cell 63 1 Jul 2016 Journal Article         |
| yap1    | hras  | <a href="http://www.ncbi.nlm.nih.gov/entrez/query.fcgi?cmd=Retrieve&amp;db=pubmed&amp;dopt=Abstract&amp;list_uids=27380321">http://www.ncbi.nlm.nih.gov/entrez/query.fcgi?cmd=Retrieve&amp;db=pubmed&amp;dopt=Abstract&amp;list_uids=27380321</a>  6 Nat Chem Biol 12 9 Sep 2016 Journal Article    |
| yap1    | itk   | <a href="http://www.ncbi.nlm.nih.gov/entrez/query.fcgi?cmd=Retrieve&amp;db=pubmed&amp;dopt=Abstract&amp;list_uids=27432214">http://www.ncbi.nlm.nih.gov/entrez/query.fcgi?cmd=Retrieve&amp;db=pubmed&amp;dopt=Abstract&amp;list_uids=27432214</a>  6 Oncol Rep 36 3 Sep 2016 Journal Article        |
| rassf1  | smad2 | <a href="http://www.ncbi.nlm.nih.gov/entrez/query.fcgi?cmd=Retrieve&amp;db=pubmed&amp;dopt=Abstract&amp;list_uids=27292796">http://www.ncbi.nlm.nih.gov/entrez/query.fcgi?cmd=Retrieve&amp;db=pubmed&amp;dopt=Abstract&amp;list_uids=27292796</a>  6 Mol Cell 63 1 Jul 2016 Journal Article         |

|        |       |                                                                                                                                                                                                                                                                                                                                         |
|--------|-------|-----------------------------------------------------------------------------------------------------------------------------------------------------------------------------------------------------------------------------------------------------------------------------------------------------------------------------------------|
| rassf1 | yap1  | <a href="http://www.ncbi.nlm.nih.gov/entrez/query.fcgi?cmd=Retrieve&amp;db=pubmed&amp;dopt=Abstract&amp;list_uids=27292796">http://www.ncbi.nlm.nih.gov/entrez/query.fcgi?cmd=Retrieve&amp;db=pubmed&amp;dopt=Abstract&amp;list_uids=27292796</a>  6 Mol Cell 63 1 Jul 2016 Journal Article                                             |
| rassf1 | itch  | <a href="http://www.ncbi.nlm.nih.gov/entrez/query.fcgi?cmd=Retrieve&amp;db=pubmed&amp;dopt=Abstract&amp;list_uids=27292796">http://www.ncbi.nlm.nih.gov/entrez/query.fcgi?cmd=Retrieve&amp;db=pubmed&amp;dopt=Abstract&amp;list_uids=27292796</a>  6 Mol Cell 63 1 Jul 2016 Journal Article                                             |
| rassf1 | uts2r | <a href="http://www.ncbi.nlm.nih.gov/entrez/query.fcgi?cmd=Retrieve&amp;db=pubmed&amp;dopt=Abstract&amp;list_uids=27600004">http://www.ncbi.nlm.nih.gov/entrez/query.fcgi?cmd=Retrieve&amp;db=pubmed&amp;dopt=Abstract&amp;list_uids=27600004</a>  6 Zhong Nan Da Xue Xue Bao Yi Xue Ban 41 8 Aug 2016 English Abstract,Journal Article |
| bcar1  | ddr1  | <a href="http://www.ncbi.nlm.nih.gov/entrez/query.fcgi?cmd=Retrieve&amp;db=pubmed&amp;dopt=Abstract&amp;list_uids=27293031">http://www.ncbi.nlm.nih.gov/entrez/query.fcgi?cmd=Retrieve&amp;db=pubmed&amp;dopt=Abstract&amp;list_uids=27293031</a>  6 Sci Rep 6   2016 Journal Article                                                   |
| bcar1  | abl1  | <a href="http://www.ncbi.nlm.nih.gov/entrez/query.fcgi?cmd=Retrieve&amp;db=pubmed&amp;dopt=Abstract&amp;list_uids=27293031">http://www.ncbi.nlm.nih.gov/entrez/query.fcgi?cmd=Retrieve&amp;db=pubmed&amp;dopt=Abstract&amp;list_uids=27293031</a>  6 Sci Rep 6   2016 Journal Article                                                   |
| bcar1  | pxn   | <a href="http://www.ncbi.nlm.nih.gov/entrez/query.fcgi?cmd=Retrieve&amp;db=pubmed&amp;dopt=Abstract&amp;list_uids=27293031">http://www.ncbi.nlm.nih.gov/entrez/query.fcgi?cmd=Retrieve&amp;db=pubmed&amp;dopt=Abstract&amp;list_uids=27293031</a>  6 Sci Rep 6   2016 Journal Article                                                   |
| bcar1  | ptk2  | <a href="http://www.ncbi.nlm.nih.gov/entrez/query.fcgi?cmd=Retrieve&amp;db=pubmed&amp;dopt=Abstract&amp;list_uids=27293031">http://www.ncbi.nlm.nih.gov/entrez/query.fcgi?cmd=Retrieve&amp;db=pubmed&amp;dopt=Abstract&amp;list_uids=27293031</a>  6 Sci Rep 6   2016 Journal Article                                                   |
| ddr1   | ephb2 | <a href="http://www.ncbi.nlm.nih.gov/entrez/query.fcgi?cmd=Retrieve&amp;db=pubmed&amp;dopt=Abstract&amp;list_uids=27391444">http://www.ncbi.nlm.nih.gov/entrez/query.fcgi?cmd=Retrieve&amp;db=pubmed&amp;dopt=Abstract&amp;list_uids=27391444</a>  6 Oncotarget   Jul 2016 JOURNAL ARTICLE                                              |
| ddr1   | rhoa  | <a href="http://www.ncbi.nlm.nih.gov/entrez/query.fcgi?cmd=Retrieve&amp;db=pubmed&amp;dopt=Abstract&amp;list_uids=27391444">http://www.ncbi.nlm.nih.gov/entrez/query.fcgi?cmd=Retrieve&amp;db=pubmed&amp;dopt=Abstract&amp;list_uids=27391444</a>  6 Oncotarget   Jul 2016 JOURNAL ARTICLE                                              |
| abl1   | ddr1  | <a href="http://www.ncbi.nlm.nih.gov/entrez/query.fcgi?cmd=Retrieve&amp;db=pubmed&amp;dopt=Abstract&amp;list_uids=27293031">http://www.ncbi.nlm.nih.gov/entrez/query.fcgi?cmd=Retrieve&amp;db=pubmed&amp;dopt=Abstract&amp;list_uids=27293031</a>  6 Sci Rep 6   2016 Journal Article                                                   |
| sox2   | setd2 | <a href="http://www.ncbi.nlm.nih.gov/entrez/query.fcgi?cmd=Retrieve&amp;db=pubmed&amp;dopt=Abstract&amp;list_uids=27294000">http://www.ncbi.nlm.nih.gov/entrez/query.fcgi?cmd=Retrieve&amp;db=pubmed&amp;dopt=Abstract&amp;list_uids=27294000</a>  6 Am J Cancer Res 6 5  2016 Journal Article                                          |
| sox2   | stat3 | <a href="http://www.ncbi.nlm.nih.gov/entrez/query.fcgi?cmd=Retrieve&amp;db=pubmed&amp;dopt=Abstract&amp;list_uids=27472461">http://www.ncbi.nlm.nih.gov/entrez/query.fcgi?cmd=Retrieve&amp;db=pubmed&amp;dopt=Abstract&amp;list_uids=27472461</a>  6 Oncotarget   Jul 2016 JOURNAL ARTICLE                                              |
| dap    | kdr   | <a href="http://www.ncbi.nlm.nih.gov/entrez/query.fcgi?cmd=Retrieve&amp;db=pubmed&amp;dopt=Abstract&amp;list_uids=27297262">http://www.ncbi.nlm.nih.gov/entrez/query.fcgi?cmd=Retrieve&amp;db=pubmed&amp;dopt=Abstract&amp;list_uids=27297262</a>  6 Clin Exp Pharmacol Physiol 43 10 Oct 2016 Journal Article                          |
| dap    | akt1  | <a href="http://www.ncbi.nlm.nih.gov/entrez/query.fcgi?cmd=Retrieve&amp;db=pubmed&amp;dopt=Abstract&amp;list_uids=27297262">http://www.ncbi.nlm.nih.gov/entrez/query.fcgi?cmd=Retrieve&amp;db=pubmed&amp;dopt=Abstract&amp;list_uids=27297262</a>  6 Clin Exp Pharmacol Physiol 43 10 Oct 2016 Journal Article                          |
| dap    | mapk3 | <a href="http://www.ncbi.nlm.nih.gov/entrez/query.fcgi?cmd=Retrieve&amp;db=pubmed&amp;dopt=Abstract&amp;list_uids=27297262">http://www.ncbi.nlm.nih.gov/entrez/query.fcgi?cmd=Retrieve&amp;db=pubmed&amp;dopt=Abstract&amp;list_uids=27297262</a>  6 Clin Exp Pharmacol Physiol 43 10 Oct 2016 Journal Article                          |
| dap    | ptk2  | <a href="http://www.ncbi.nlm.nih.gov/entrez/query.fcgi?cmd=Retrieve&amp;db=pubmed&amp;dopt=Abstract&amp;list_uids=27297262">http://www.ncbi.nlm.nih.gov/entrez/query.fcgi?cmd=Retrieve&amp;db=pubmed&amp;dopt=Abstract&amp;list_uids=27297262</a>  6 Clin Exp Pharmacol Physiol 43 10 Oct 2016 Journal Article                          |
| dap    | src   | <a href="http://www.ncbi.nlm.nih.gov/entrez/query.fcgi?cmd=Retrieve&amp;db=pubmed&amp;dopt=Abstract&amp;list_uids=27297262">http://www.ncbi.nlm.nih.gov/entrez/query.fcgi?cmd=Retrieve&amp;db=pubmed&amp;dopt=Abstract&amp;list_uids=27297262</a>  6 Clin Exp Pharmacol Physiol 43 10 Oct 2016 Journal Article                          |
| dap    | vegfa | <a href="http://www.ncbi.nlm.nih.gov/entrez/query.fcgi?cmd=Retrieve&amp;db=pubmed&amp;dopt=Abstract&amp;list_uids=27297262">http://www.ncbi.nlm.nih.gov/entrez/query.fcgi?cmd=Retrieve&amp;db=pubmed&amp;dopt=Abstract&amp;list_uids=27297262</a>  6 Clin Exp Pharmacol Physiol 43 10 Oct 2016 Journal Article                          |

|        |        |                                                                                                                                                                                                                                                                                                                |
|--------|--------|----------------------------------------------------------------------------------------------------------------------------------------------------------------------------------------------------------------------------------------------------------------------------------------------------------------|
| dap    | krit1  | <a href="http://www.ncbi.nlm.nih.gov/entrez/query.fcgi?cmd=Retrieve&amp;db=pubmed&amp;dopt=Abstract&amp;list_uids=27297262">http://www.ncbi.nlm.nih.gov/entrez/query.fcgi?cmd=Retrieve&amp;db=pubmed&amp;dopt=Abstract&amp;list_uids=27297262</a>  6 Clin Exp Pharmacol Physiol 43 10 Oct 2016 Journal Article |
| dap    | rara   | <a href="http://www.ncbi.nlm.nih.gov/entrez/query.fcgi?cmd=Retrieve&amp;db=pubmed&amp;dopt=Abstract&amp;list_uids=27297262">http://www.ncbi.nlm.nih.gov/entrez/query.fcgi?cmd=Retrieve&amp;db=pubmed&amp;dopt=Abstract&amp;list_uids=27297262</a>  6 Clin Exp Pharmacol Physiol 43 10 Oct 2016 Journal Article |
| dap    | fas    | <a href="http://www.ncbi.nlm.nih.gov/entrez/query.fcgi?cmd=Retrieve&amp;db=pubmed&amp;dopt=Abstract&amp;list_uids=27415751">http://www.ncbi.nlm.nih.gov/entrez/query.fcgi?cmd=Retrieve&amp;db=pubmed&amp;dopt=Abstract&amp;list_uids=27415751</a>  6 Cancer Biol Ther   Jul 2016 JOURNAL ARTICLE               |
| dap    | stat3  | <a href="http://www.ncbi.nlm.nih.gov/entrez/query.fcgi?cmd=Retrieve&amp;db=pubmed&amp;dopt=Abstract&amp;list_uids=27415751">http://www.ncbi.nlm.nih.gov/entrez/query.fcgi?cmd=Retrieve&amp;db=pubmed&amp;dopt=Abstract&amp;list_uids=27415751</a>  6 Cancer Biol Ther   Jul 2016 JOURNAL ARTICLE               |
| rara   | krit1  | <a href="http://www.ncbi.nlm.nih.gov/entrez/query.fcgi?cmd=Retrieve&amp;db=pubmed&amp;dopt=Abstract&amp;list_uids=27297262">http://www.ncbi.nlm.nih.gov/entrez/query.fcgi?cmd=Retrieve&amp;db=pubmed&amp;dopt=Abstract&amp;list_uids=27297262</a>  6 Clin Exp Pharmacol Physiol 43 10 Oct 2016 Journal Article |
| ptger4 | ccl21  | <a href="http://www.ncbi.nlm.nih.gov/entrez/query.fcgi?cmd=Retrieve&amp;db=pubmed&amp;dopt=Abstract&amp;list_uids=27301070">http://www.ncbi.nlm.nih.gov/entrez/query.fcgi?cmd=Retrieve&amp;db=pubmed&amp;dopt=Abstract&amp;list_uids=27301070</a>  6 Stem Cells 34 9 Sep 2016 Journal Article                  |
| ptgs2  | ccl21  | <a href="http://www.ncbi.nlm.nih.gov/entrez/query.fcgi?cmd=Retrieve&amp;db=pubmed&amp;dopt=Abstract&amp;list_uids=27301070">http://www.ncbi.nlm.nih.gov/entrez/query.fcgi?cmd=Retrieve&amp;db=pubmed&amp;dopt=Abstract&amp;list_uids=27301070</a>  6 Stem Cells 34 9 Sep 2016 Journal Article                  |
| ptgs2  | akt1   | <a href="http://www.ncbi.nlm.nih.gov/entrez/query.fcgi?cmd=Retrieve&amp;db=pubmed&amp;dopt=Abstract&amp;list_uids=27301070">http://www.ncbi.nlm.nih.gov/entrez/query.fcgi?cmd=Retrieve&amp;db=pubmed&amp;dopt=Abstract&amp;list_uids=27301070</a>  6 Stem Cells 34 9 Sep 2016 Journal Article                  |
| ptgs2  | pik3ca | <a href="http://www.ncbi.nlm.nih.gov/entrez/query.fcgi?cmd=Retrieve&amp;db=pubmed&amp;dopt=Abstract&amp;list_uids=27301070">http://www.ncbi.nlm.nih.gov/entrez/query.fcgi?cmd=Retrieve&amp;db=pubmed&amp;dopt=Abstract&amp;list_uids=27301070</a>  6 Stem Cells 34 9 Sep 2016 Journal Article                  |
| ptgs2  | ptger4 | <a href="http://www.ncbi.nlm.nih.gov/entrez/query.fcgi?cmd=Retrieve&amp;db=pubmed&amp;dopt=Abstract&amp;list_uids=27301070">http://www.ncbi.nlm.nih.gov/entrez/query.fcgi?cmd=Retrieve&amp;db=pubmed&amp;dopt=Abstract&amp;list_uids=27301070</a>  6 Stem Cells 34 9 Sep 2016 Journal Article                  |
| ptgs2  | tp53   | <a href="http://www.ncbi.nlm.nih.gov/entrez/query.fcgi?cmd=Retrieve&amp;db=pubmed&amp;dopt=Abstract&amp;list_uids=27314294">http://www.ncbi.nlm.nih.gov/entrez/query.fcgi?cmd=Retrieve&amp;db=pubmed&amp;dopt=Abstract&amp;list_uids=27314294</a>  6 Cancer Biomark 17 1 Jun 2016 Journal Article              |
| ptgs2  | apc    | <a href="http://www.ncbi.nlm.nih.gov/entrez/query.fcgi?cmd=Retrieve&amp;db=pubmed&amp;dopt=Abstract&amp;list_uids=27314294">http://www.ncbi.nlm.nih.gov/entrez/query.fcgi?cmd=Retrieve&amp;db=pubmed&amp;dopt=Abstract&amp;list_uids=27314294</a>  6 Cancer Biomark 17 1 Jun 2016 Journal Article              |
| ptgs2  | fos    | <a href="http://www.ncbi.nlm.nih.gov/entrez/query.fcgi?cmd=Retrieve&amp;db=pubmed&amp;dopt=Abstract&amp;list_uids=27530354">http://www.ncbi.nlm.nih.gov/entrez/query.fcgi?cmd=Retrieve&amp;db=pubmed&amp;dopt=Abstract&amp;list_uids=27530354</a>  6 J Nat Med   Aug 2016 JOURNAL ARTICLE                      |
| dbt    | ptger4 | <a href="http://www.ncbi.nlm.nih.gov/entrez/query.fcgi?cmd=Retrieve&amp;db=pubmed&amp;dopt=Abstract&amp;list_uids=27301070">http://www.ncbi.nlm.nih.gov/entrez/query.fcgi?cmd=Retrieve&amp;db=pubmed&amp;dopt=Abstract&amp;list_uids=27301070</a>  6 Stem Cells 34 9 Sep 2016 Journal Article                  |
| akt2   | ccnd1  | <a href="http://www.ncbi.nlm.nih.gov/entrez/query.fcgi?cmd=Retrieve&amp;db=pubmed&amp;dopt=Abstract&amp;list_uids=27364926">http://www.ncbi.nlm.nih.gov/entrez/query.fcgi?cmd=Retrieve&amp;db=pubmed&amp;dopt=Abstract&amp;list_uids=27364926</a>  6 Sci Rep 6   2016 Journal Article                          |
| eed    | foxm1  | <a href="http://www.ncbi.nlm.nih.gov/entrez/query.fcgi?cmd=Retrieve&amp;db=pubmed&amp;dopt=Abstract&amp;list_uids=27303043">http://www.ncbi.nlm.nih.gov/entrez/query.fcgi?cmd=Retrieve&amp;db=pubmed&amp;dopt=Abstract&amp;list_uids=27303043</a>  6 Proc Natl Acad Sci U S A 113 26 Jun 2016 Journal Article  |
| eed    | ezh2   | <a href="http://www.ncbi.nlm.nih.gov/entrez/query.fcgi?cmd=Retrieve&amp;db=pubmed&amp;dopt=Abstract&amp;list_uids=27303043">http://www.ncbi.nlm.nih.gov/entrez/query.fcgi?cmd=Retrieve&amp;db=pubmed&amp;dopt=Abstract&amp;list_uids=27303043</a>  6 Proc Natl Acad Sci U S A 113 26 Jun 2016 Journal Article  |
| suz12  | foxm1  | <a href="http://www.ncbi.nlm.nih.gov/entrez/query.fcgi?cmd=Retrieve&amp;db=pubmed&amp;dopt=Abstract&amp;list_uids=27303043">http://www.ncbi.nlm.nih.gov/entrez/query.fcgi?cmd=Retrieve&amp;db=pubmed&amp;dopt=Abstract&amp;list_uids=27303043</a>  6 Proc Natl Acad Sci U S A 113 26 Jun 2016 Journal Article  |

|          |       |                                                                                                                                                                                                                                                                                                               |
|----------|-------|---------------------------------------------------------------------------------------------------------------------------------------------------------------------------------------------------------------------------------------------------------------------------------------------------------------|
| suz12    | ezh2  | <a href="http://www.ncbi.nlm.nih.gov/entrez/query.fcgi?cmd=Retrieve&amp;db=pubmed&amp;dopt=Abstract&amp;list_uids=27303043">http://www.ncbi.nlm.nih.gov/entrez/query.fcgi?cmd=Retrieve&amp;db=pubmed&amp;dopt=Abstract&amp;list_uids=27303043</a>  6 Proc Natl Acad Sci U S A 113 26 Jun 2016 Journal Article |
| suz12    | eed   | <a href="http://www.ncbi.nlm.nih.gov/entrez/query.fcgi?cmd=Retrieve&amp;db=pubmed&amp;dopt=Abstract&amp;list_uids=27303043">http://www.ncbi.nlm.nih.gov/entrez/query.fcgi?cmd=Retrieve&amp;db=pubmed&amp;dopt=Abstract&amp;list_uids=27303043</a>  6 Proc Natl Acad Sci U S A 113 26 Jun 2016 Journal Article |
| vip      | egfr  | <a href="http://www.ncbi.nlm.nih.gov/entrez/query.fcgi?cmd=Retrieve&amp;db=pubmed&amp;dopt=Abstract&amp;list_uids=27303300">http://www.ncbi.nlm.nih.gov/entrez/query.fcgi?cmd=Retrieve&amp;db=pubmed&amp;dopt=Abstract&amp;list_uids=27303300</a>  6 Front Pharmacol 7   2016 Journal Article                 |
| adcyp1   | egfr  | <a href="http://www.ncbi.nlm.nih.gov/entrez/query.fcgi?cmd=Retrieve&amp;db=pubmed&amp;dopt=Abstract&amp;list_uids=27303300">http://www.ncbi.nlm.nih.gov/entrez/query.fcgi?cmd=Retrieve&amp;db=pubmed&amp;dopt=Abstract&amp;list_uids=27303300</a>  6 Front Pharmacol 7   2016 Journal Article                 |
| adcyp1   | vip   | <a href="http://www.ncbi.nlm.nih.gov/entrez/query.fcgi?cmd=Retrieve&amp;db=pubmed&amp;dopt=Abstract&amp;list_uids=27303300">http://www.ncbi.nlm.nih.gov/entrez/query.fcgi?cmd=Retrieve&amp;db=pubmed&amp;dopt=Abstract&amp;list_uids=27303300</a>  6 Front Pharmacol 7   2016 Journal Article                 |
| vdac1    | tlr2  | <a href="http://www.ncbi.nlm.nih.gov/entrez/query.fcgi?cmd=Retrieve&amp;db=pubmed&amp;dopt=Abstract&amp;list_uids=27373686">http://www.ncbi.nlm.nih.gov/entrez/query.fcgi?cmd=Retrieve&amp;db=pubmed&amp;dopt=Abstract&amp;list_uids=27373686</a>  6 Microbes Infect   Jul 2016 JOURNAL ARTICLE               |
| atp8a2   | vdac1 | <a href="http://www.ncbi.nlm.nih.gov/entrez/query.fcgi?cmd=Retrieve&amp;db=pubmed&amp;dopt=Abstract&amp;list_uids=27304056">http://www.ncbi.nlm.nih.gov/entrez/query.fcgi?cmd=Retrieve&amp;db=pubmed&amp;dopt=Abstract&amp;list_uids=27304056</a>  6 Oncotarget   Jun 2016 JOURNAL ARTICLE                    |
| atp8a2   | abce1 | <a href="http://www.ncbi.nlm.nih.gov/entrez/query.fcgi?cmd=Retrieve&amp;db=pubmed&amp;dopt=Abstract&amp;list_uids=27314749">http://www.ncbi.nlm.nih.gov/entrez/query.fcgi?cmd=Retrieve&amp;db=pubmed&amp;dopt=Abstract&amp;list_uids=27314749</a>  6 Mol Med Rep 14 2 Aug 2016 Journal Article                |
| postn    | stat3 | <a href="http://www.ncbi.nlm.nih.gov/entrez/query.fcgi?cmd=Retrieve&amp;db=pubmed&amp;dopt=Abstract&amp;list_uids=27307601">http://www.ncbi.nlm.nih.gov/entrez/query.fcgi?cmd=Retrieve&amp;db=pubmed&amp;dopt=Abstract&amp;list_uids=27307601</a>  6 Mol Cancer Ther 15 9 Sep 2016 Journal Article            |
| postn    | vegfa | <a href="http://www.ncbi.nlm.nih.gov/entrez/query.fcgi?cmd=Retrieve&amp;db=pubmed&amp;dopt=Abstract&amp;list_uids=27307601">http://www.ncbi.nlm.nih.gov/entrez/query.fcgi?cmd=Retrieve&amp;db=pubmed&amp;dopt=Abstract&amp;list_uids=27307601</a>  6 Mol Cancer Ther 15 9 Sep 2016 Journal Article            |
| postn    | itk   | <a href="http://www.ncbi.nlm.nih.gov/entrez/query.fcgi?cmd=Retrieve&amp;db=pubmed&amp;dopt=Abstract&amp;list_uids=27307601">http://www.ncbi.nlm.nih.gov/entrez/query.fcgi?cmd=Retrieve&amp;db=pubmed&amp;dopt=Abstract&amp;list_uids=27307601</a>  6 Mol Cancer Ther 15 9 Sep 2016 Journal Article            |
| mirn200b | ldha  | <a href="http://www.ncbi.nlm.nih.gov/entrez/query.fcgi?cmd=Retrieve&amp;db=pubmed&amp;dopt=Abstract&amp;list_uids=27374173">http://www.ncbi.nlm.nih.gov/entrez/query.fcgi?cmd=Retrieve&amp;db=pubmed&amp;dopt=Abstract&amp;list_uids=27374173</a>  6 Oncotarget   Jun 2016 JOURNAL ARTICLE                    |
| cdc42    | pak7  | <a href="http://www.ncbi.nlm.nih.gov/entrez/query.fcgi?cmd=Retrieve&amp;db=pubmed&amp;dopt=Abstract&amp;list_uids=27323857">http://www.ncbi.nlm.nih.gov/entrez/query.fcgi?cmd=Retrieve&amp;db=pubmed&amp;dopt=Abstract&amp;list_uids=27323857</a>  6 Oncotarget   Jun 2016 JOURNAL ARTICLE                    |
| cdc42    | akt1  | <a href="http://www.ncbi.nlm.nih.gov/entrez/query.fcgi?cmd=Retrieve&amp;db=pubmed&amp;dopt=Abstract&amp;list_uids=27323857">http://www.ncbi.nlm.nih.gov/entrez/query.fcgi?cmd=Retrieve&amp;db=pubmed&amp;dopt=Abstract&amp;list_uids=27323857</a>  6 Oncotarget   Jun 2016 JOURNAL ARTICLE                    |
| cdc42    | mmp9  | <a href="http://www.ncbi.nlm.nih.gov/entrez/query.fcgi?cmd=Retrieve&amp;db=pubmed&amp;dopt=Abstract&amp;list_uids=27367023">http://www.ncbi.nlm.nih.gov/entrez/query.fcgi?cmd=Retrieve&amp;db=pubmed&amp;dopt=Abstract&amp;list_uids=27367023</a>  6 Oncotarget   Jun 2016 JOURNAL ARTICLE                    |
| cdc42    | mapk8 | <a href="http://www.ncbi.nlm.nih.gov/entrez/query.fcgi?cmd=Retrieve&amp;db=pubmed&amp;dopt=Abstract&amp;list_uids=27367023">http://www.ncbi.nlm.nih.gov/entrez/query.fcgi?cmd=Retrieve&amp;db=pubmed&amp;dopt=Abstract&amp;list_uids=27367023</a>  6 Oncotarget   Jun 2016 JOURNAL ARTICLE                    |
| cdc42    | cd47  | <a href="http://www.ncbi.nlm.nih.gov/entrez/query.fcgi?cmd=Retrieve&amp;db=pubmed&amp;dopt=Abstract&amp;list_uids=27411490">http://www.ncbi.nlm.nih.gov/entrez/query.fcgi?cmd=Retrieve&amp;db=pubmed&amp;dopt=Abstract&amp;list_uids=27411490</a>  6 Sci Rep 6   2016 Journal Article                         |
| cdc42    | ptk2  | <a href="http://www.ncbi.nlm.nih.gov/entrez/query.fcgi?cmd=Retrieve&amp;db=pubmed&amp;dopt=Abstract&amp;list_uids=27486972">http://www.ncbi.nlm.nih.gov/entrez/query.fcgi?cmd=Retrieve&amp;db=pubmed&amp;dopt=Abstract&amp;list_uids=27486972</a>  6 Oncotarget   Jul 2016 JOURNAL ARTICLE                    |

|         |        |                                                                                                                                                                                                                                                                                                                                                                                                                                                                                                                                                                                                                                                                                                                                                                                                                                                                                                                                                                                                                                                                                                                                                                                                                                                                                                                                                                                                                                                                                                                                                                                                                                                                                                                                                                                                |
|---------|--------|------------------------------------------------------------------------------------------------------------------------------------------------------------------------------------------------------------------------------------------------------------------------------------------------------------------------------------------------------------------------------------------------------------------------------------------------------------------------------------------------------------------------------------------------------------------------------------------------------------------------------------------------------------------------------------------------------------------------------------------------------------------------------------------------------------------------------------------------------------------------------------------------------------------------------------------------------------------------------------------------------------------------------------------------------------------------------------------------------------------------------------------------------------------------------------------------------------------------------------------------------------------------------------------------------------------------------------------------------------------------------------------------------------------------------------------------------------------------------------------------------------------------------------------------------------------------------------------------------------------------------------------------------------------------------------------------------------------------------------------------------------------------------------------------|
| cdc42   | iqgap1 | <a href="http://www.ncbi.nlm.nih.gov/entrez/query.fcgi?cmd=Retrieve&amp;db=pubmed&amp;dopt=Abstract&amp;list_uids=27486972">http://www.ncbi.nlm.nih.gov/entrez/query.fcgi?cmd=Retrieve&amp;db=pubmed&amp;dopt=Abstract&amp;list_uids=27486972</a>  6 Oncotarget  Jul 2016 JOURNAL ARTICLE                                                                                                                                                                                                                                                                                                                                                                                                                                                                                                                                                                                                                                                                                                                                                                                                                                                                                                                                                                                                                                                                                                                                                                                                                                                                                                                                                                                                                                                                                                      |
| arhgap1 | cdc42  | <a href="http://www.ncbi.nlm.nih.gov/entrez/query.fcgi?cmd=Retrieve&amp;db=pubmed&amp;dopt=Abstract&amp;list_uids=27311480">http://www.ncbi.nlm.nih.gov/entrez/query.fcgi?cmd=Retrieve&amp;db=pubmed&amp;dopt=Abstract&amp;list_uids=27311480</a>  6 J Cell Sci 129 15 Aug 2016 Journal Article                                                                                                                                                                                                                                                                                                                                                                                                                                                                                                                                                                                                                                                                                                                                                                                                                                                                                                                                                                                                                                                                                                                                                                                                                                                                                                                                                                                                                                                                                                |
| il6     | jak2   | <a href="http://www.ncbi.nlm.nih.gov/entrez/query.fcgi?cmd=Retrieve&amp;db=pubmed&amp;dopt=Abstract&amp;list_uids=27471397">http://www.ncbi.nlm.nih.gov/entrez/query.fcgi?cmd=Retrieve&amp;db=pubmed&amp;dopt=Abstract&amp;list_uids=27471397</a>  6 Onco Targets Ther 9   2016 Journal Article                                                                                                                                                                                                                                                                                                                                                                                                                                                                                                                                                                                                                                                                                                                                                                                                                                                                                                                                                                                                                                                                                                                                                                                                                                                                                                                                                                                                                                                                                                |
| il6     | mmp1   | <a href="http://www.ncbi.nlm.nih.gov/entrez/query.fcgi?cmd=Retrieve&amp;db=pubmed&amp;dopt=Abstract&amp;list_uids=27566200">http://www.ncbi.nlm.nih.gov/entrez/query.fcgi?cmd=Retrieve&amp;db=pubmed&amp;dopt=Abstract&amp;list_uids=27566200</a>  6 J Ethnopharmacol   Aug 2016 JOURNAL ARTICLE                                                                                                                                                                                                                                                                                                                                                                                                                                                                                                                                                                                                                                                                                                                                                                                                                                                                                                                                                                                                                                                                                                                                                                                                                                                                                                                                                                                                                                                                                               |
| il6     | hcc    | <a href="http://www.ncbi.nlm.nih.gov/entrez/query.fcgi?cmd=Retrieve&amp;db=pubmed&amp;dopt=Abstract&amp;list_uids=27608898">http://www.ncbi.nlm.nih.gov/entrez/query.fcgi?cmd=Retrieve&amp;db=pubmed&amp;dopt=Abstract&amp;list_uids=27608898</a>  6 Eur Rev Med Pharmacol Sci 20 16 Aug 2016 Journal Article                                                                                                                                                                                                                                                                                                                                                                                                                                                                                                                                                                                                                                                                                                                                                                                                                                                                                                                                                                                                                                                                                                                                                                                                                                                                                                                                                                                                                                                                                  |
| il6     | stat3  | <a href="http://www.ncbi.nlm.nih.gov/entrez/query.fcgi?cmd=Retrieve&amp;db=pubmed&amp;dopt=Abstract&amp;list_uids=27608898">http://www.ncbi.nlm.nih.gov/entrez/query.fcgi?cmd=Retrieve&amp;db=pubmed&amp;dopt=Abstract&amp;list_uids=27608898</a>  6 Eur Rev Med Pharmacol Sci 20 16 Aug 2016 Journal Article  <a href="http://www.ncbi.nlm.nih.gov/entrez/query.fcgi?cmd=Retrieve&amp;db=pubmed&amp;dopt=Abstract&amp;list_uids=27471397">http://www.ncbi.nlm.nih.gov/entrez/query.fcgi?cmd=Retrieve&amp;db=pubmed&amp;dopt=Abstract&amp;list_uids=27471397</a>  6 Onco Targets Ther 9   2016 Journal Article  <a href="http://www.ncbi.nlm.nih.gov/entrez/query.fcgi?cmd=Retrieve&amp;db=pubmed&amp;dopt=Abstract&amp;list_uids=27384401">http://www.ncbi.nlm.nih.gov/entrez/query.fcgi?cmd=Retrieve&amp;db=pubmed&amp;dopt=Abstract&amp;list_uids=27384401</a>  6 Sci Rep 6   2016 Journal Article  <a href="http://www.ncbi.nlm.nih.gov/entrez/query.fcgi?cmd=Retrieve&amp;db=pubmed&amp;dopt=Abstract&amp;list_uids=27566200">http://www.ncbi.nlm.nih.gov/entrez/query.fcgi?cmd=Retrieve&amp;db=pubmed&amp;dopt=Abstract&amp;list_uids=27566200</a>  6 J Ethnopharmacol   Aug 2016 JOURNAL ARTICLE  <a href="http://www.ncbi.nlm.nih.gov/entrez/query.fcgi?cmd=Retrieve&amp;db=pubmed&amp;dopt=Abstract&amp;list_uids=27510094">http://www.ncbi.nlm.nih.gov/entrez/query.fcgi?cmd=Retrieve&amp;db=pubmed&amp;dopt=Abstract&amp;list_uids=27510094</a>  6 Oncol Rep   Aug 2016 JOURNAL ARTICLE  <a href="http://www.ncbi.nlm.nih.gov/entrez/query.fcgi?cmd=Retrieve&amp;db=pubmed&amp;dopt=Abstract&amp;list_uids=27602757">http://www.ncbi.nlm.nih.gov/entrez/query.fcgi?cmd=Retrieve&amp;db=pubmed&amp;dopt=Abstract&amp;list_uids=27602757</a>  6 Oncotarget   Sep 2016 JOURNAL ARTICLE |
| il6     | mmp2   | <a href="http://www.ncbi.nlm.nih.gov/entrez/query.fcgi?cmd=Retrieve&amp;db=pubmed&amp;dopt=Abstract&amp;list_uids=27613828">http://www.ncbi.nlm.nih.gov/entrez/query.fcgi?cmd=Retrieve&amp;db=pubmed&amp;dopt=Abstract&amp;list_uids=27613828</a>  6 Oncotarget  Aug 2016 JOURNAL ARTICLE                                                                                                                                                                                                                                                                                                                                                                                                                                                                                                                                                                                                                                                                                                                                                                                                                                                                                                                                                                                                                                                                                                                                                                                                                                                                                                                                                                                                                                                                                                      |
| il6     | mmp14  | <a href="http://www.ncbi.nlm.nih.gov/entrez/query.fcgi?cmd=Retrieve&amp;db=pubmed&amp;dopt=Abstract&amp;list_uids=27613828">http://www.ncbi.nlm.nih.gov/entrez/query.fcgi?cmd=Retrieve&amp;db=pubmed&amp;dopt=Abstract&amp;list_uids=27613828</a>  6 Oncotarget  Aug 2016 JOURNAL ARTICLE                                                                                                                                                                                                                                                                                                                                                                                                                                                                                                                                                                                                                                                                                                                                                                                                                                                                                                                                                                                                                                                                                                                                                                                                                                                                                                                                                                                                                                                                                                      |
| spp1    | il8    | <a href="http://www.ncbi.nlm.nih.gov/entrez/query.fcgi?cmd=Retrieve&amp;db=pubmed&amp;dopt=Abstract&amp;list_uids=27312487">http://www.ncbi.nlm.nih.gov/entrez/query.fcgi?cmd=Retrieve&amp;db=pubmed&amp;dopt=Abstract&amp;list_uids=27312487</a>  6 Tumour Biol   Jun 2016 JOURNAL ARTICLE                                                                                                                                                                                                                                                                                                                                                                                                                                                                                                                                                                                                                                                                                                                                                                                                                                                                                                                                                                                                                                                                                                                                                                                                                                                                                                                                                                                                                                                                                                    |
| spp1    | il6    | <a href="http://www.ncbi.nlm.nih.gov/entrez/query.fcgi?cmd=Retrieve&amp;db=pubmed&amp;dopt=Abstract&amp;list_uids=27312487">http://www.ncbi.nlm.nih.gov/entrez/query.fcgi?cmd=Retrieve&amp;db=pubmed&amp;dopt=Abstract&amp;list_uids=27312487</a>  6 Tumour Biol   Jun 2016 JOURNAL ARTICLE                                                                                                                                                                                                                                                                                                                                                                                                                                                                                                                                                                                                                                                                                                                                                                                                                                                                                                                                                                                                                                                                                                                                                                                                                                                                                                                                                                                                                                                                                                    |
| spp1    | cd34   | <a href="http://www.ncbi.nlm.nih.gov/entrez/query.fcgi?cmd=Retrieve&amp;db=pubmed&amp;dopt=Abstract&amp;list_uids=27489587">http://www.ncbi.nlm.nih.gov/entrez/query.fcgi?cmd=Retrieve&amp;db=pubmed&amp;dopt=Abstract&amp;list_uids=27489587</a>  6 Int J Hematol Oncol Stem Cell Res 10 3 Jul 2016 Journal Article                                                                                                                                                                                                                                                                                                                                                                                                                                                                                                                                                                                                                                                                                                                                                                                                                                                                                                                                                                                                                                                                                                                                                                                                                                                                                                                                                                                                                                                                           |
| spp1    | cd38   | <a href="http://www.ncbi.nlm.nih.gov/entrez/query.fcgi?cmd=Retrieve&amp;db=pubmed&amp;dopt=Abstract&amp;list_uids=27489587">http://www.ncbi.nlm.nih.gov/entrez/query.fcgi?cmd=Retrieve&amp;db=pubmed&amp;dopt=Abstract&amp;list_uids=27489587</a>  6 Int J Hematol Oncol Stem Cell Res 10 3 Jul 2016 Journal Article                                                                                                                                                                                                                                                                                                                                                                                                                                                                                                                                                                                                                                                                                                                                                                                                                                                                                                                                                                                                                                                                                                                                                                                                                                                                                                                                                                                                                                                                           |
| sirt1   | sox2   | <a href="http://www.ncbi.nlm.nih.gov/entrez/query.fcgi?cmd=Retrieve&amp;db=pubmed&amp;dopt=Abstract&amp;list_uids=27312708">http://www.ncbi.nlm.nih.gov/entrez/query.fcgi?cmd=Retrieve&amp;db=pubmed&amp;dopt=Abstract&amp;list_uids=27312708</a>  6 Hepatology 64 3 Sep 2016 Journal Article                                                                                                                                                                                                                                                                                                                                                                                                                                                                                                                                                                                                                                                                                                                                                                                                                                                                                                                                                                                                                                                                                                                                                                                                                                                                                                                                                                                                                                                                                                  |

|        |        |                                                                                                                                                                                                                                                                                                       |
|--------|--------|-------------------------------------------------------------------------------------------------------------------------------------------------------------------------------------------------------------------------------------------------------------------------------------------------------|
| dicer1 | hcc    | <a href="http://www.ncbi.nlm.nih.gov/entrez/query.fcgi?cmd=Retrieve&amp;db=pubmed&amp;dopt=Abstract&amp;list_uids=27313724">http://www.ncbi.nlm.nih.gov/entrez/query.fcgi?cmd=Retrieve&amp;db=pubmed&amp;dopt=Abstract&amp;list_uids=27313724</a>  6 Oncol Lett 11 6 Jun 2016 JOURNAL ARTICLE         |
| afp    | hcc    | <a href="http://www.ncbi.nlm.nih.gov/entrez/query.fcgi?cmd=Retrieve&amp;db=pubmed&amp;dopt=Abstract&amp;list_uids=27313784">http://www.ncbi.nlm.nih.gov/entrez/query.fcgi?cmd=Retrieve&amp;db=pubmed&amp;dopt=Abstract&amp;list_uids=27313784</a>  6 J Cancer 7 8 2016 Journal Article                |
| cxcr4  | hcc    | <a href="http://www.ncbi.nlm.nih.gov/entrez/query.fcgi?cmd=Retrieve&amp;db=pubmed&amp;dopt=Abstract&amp;list_uids=27313784">http://www.ncbi.nlm.nih.gov/entrez/query.fcgi?cmd=Retrieve&amp;db=pubmed&amp;dopt=Abstract&amp;list_uids=27313784</a>  6 J Cancer 7 8 2016 Journal Article                |
| cxcr4  | afp    | <a href="http://www.ncbi.nlm.nih.gov/entrez/query.fcgi?cmd=Retrieve&amp;db=pubmed&amp;dopt=Abstract&amp;list_uids=27313784">http://www.ncbi.nlm.nih.gov/entrez/query.fcgi?cmd=Retrieve&amp;db=pubmed&amp;dopt=Abstract&amp;list_uids=27313784</a>  6 J Cancer 7 8 2016 Journal Article                |
| apc    | tp53   | <a href="http://www.ncbi.nlm.nih.gov/entrez/query.fcgi?cmd=Retrieve&amp;db=pubmed&amp;dopt=Abstract&amp;list_uids=27314294">http://www.ncbi.nlm.nih.gov/entrez/query.fcgi?cmd=Retrieve&amp;db=pubmed&amp;dopt=Abstract&amp;list_uids=27314294</a>  6 Cancer Biomark 17 1 Jun 2016 Journal Article     |
| ifi27  | cdkn1b | <a href="http://www.ncbi.nlm.nih.gov/entrez/query.fcgi?cmd=Retrieve&amp;db=pubmed&amp;dopt=Abstract&amp;list_uids=27591936">http://www.ncbi.nlm.nih.gov/entrez/query.fcgi?cmd=Retrieve&amp;db=pubmed&amp;dopt=Abstract&amp;list_uids=27591936</a>  6 Cancer Lett   Aug 2016 JOURNAL ARTICLE           |
| abce1  | ifi27  | <a href="http://www.ncbi.nlm.nih.gov/entrez/query.fcgi?cmd=Retrieve&amp;db=pubmed&amp;dopt=Abstract&amp;list_uids=27314749">http://www.ncbi.nlm.nih.gov/entrez/query.fcgi?cmd=Retrieve&amp;db=pubmed&amp;dopt=Abstract&amp;list_uids=27314749</a>  6 Mol Med Rep 14 2 Aug 2016 Journal Article        |
| decr1  | ephb2  | <a href="http://www.ncbi.nlm.nih.gov/entrez/query.fcgi?cmd=Retrieve&amp;db=pubmed&amp;dopt=Abstract&amp;list_uids=27315395">http://www.ncbi.nlm.nih.gov/entrez/query.fcgi?cmd=Retrieve&amp;db=pubmed&amp;dopt=Abstract&amp;list_uids=27315395</a>  6 Mol Oral Microbiol   Jun 2016 JOURNAL ARTICLE    |
| cav1   | ephb2  | <a href="http://www.ncbi.nlm.nih.gov/entrez/query.fcgi?cmd=Retrieve&amp;db=pubmed&amp;dopt=Abstract&amp;list_uids=27315395">http://www.ncbi.nlm.nih.gov/entrez/query.fcgi?cmd=Retrieve&amp;db=pubmed&amp;dopt=Abstract&amp;list_uids=27315395</a>  6 Mol Oral Microbiol   Jun 2016 JOURNAL ARTICLE    |
| cav1   | decr1  | <a href="http://www.ncbi.nlm.nih.gov/entrez/query.fcgi?cmd=Retrieve&amp;db=pubmed&amp;dopt=Abstract&amp;list_uids=27315395">http://www.ncbi.nlm.nih.gov/entrez/query.fcgi?cmd=Retrieve&amp;db=pubmed&amp;dopt=Abstract&amp;list_uids=27315395</a>  6 Mol Oral Microbiol   Jun 2016 JOURNAL ARTICLE    |
| h2afx  | zeb1   | <a href="http://www.ncbi.nlm.nih.gov/entrez/query.fcgi?cmd=Retrieve&amp;db=pubmed&amp;dopt=Abstract&amp;list_uids=27315462">http://www.ncbi.nlm.nih.gov/entrez/query.fcgi?cmd=Retrieve&amp;db=pubmed&amp;dopt=Abstract&amp;list_uids=27315462</a>  6 Cell Cycle 15 18 Sep 2016 Journal Article        |
| h2afx  | itk    | <a href="http://www.ncbi.nlm.nih.gov/entrez/query.fcgi?cmd=Retrieve&amp;db=pubmed&amp;dopt=Abstract&amp;list_uids=27315462">http://www.ncbi.nlm.nih.gov/entrez/query.fcgi?cmd=Retrieve&amp;db=pubmed&amp;dopt=Abstract&amp;list_uids=27315462</a>  6 Cell Cycle 15 18 Sep 2016 Journal Article        |
| kras   | sparc  | <a href="http://www.ncbi.nlm.nih.gov/entrez/query.fcgi?cmd=Retrieve&amp;db=pubmed&amp;dopt=Abstract&amp;list_uids=27318148">http://www.ncbi.nlm.nih.gov/entrez/query.fcgi?cmd=Retrieve&amp;db=pubmed&amp;dopt=Abstract&amp;list_uids=27318148</a>  6 Gastroent erology 151 3 Sep 2016 Journal Article |
| kras   | tp53   | <a href="http://www.ncbi.nlm.nih.gov/entrez/query.fcgi?cmd=Retrieve&amp;db=pubmed&amp;dopt=Abstract&amp;list_uids=27318148">http://www.ncbi.nlm.nih.gov/entrez/query.fcgi?cmd=Retrieve&amp;db=pubmed&amp;dopt=Abstract&amp;list_uids=27318148</a>  6 Gastroent erology 151 3 Sep 2016 Journal Article |
| etv1   | sparc  | <a href="http://www.ncbi.nlm.nih.gov/entrez/query.fcgi?cmd=Retrieve&amp;db=pubmed&amp;dopt=Abstract&amp;list_uids=27318148">http://www.ncbi.nlm.nih.gov/entrez/query.fcgi?cmd=Retrieve&amp;db=pubmed&amp;dopt=Abstract&amp;list_uids=27318148</a>  6 Gastroent erology 151 3 Sep 2016 Journal Article |
| etv1   | tp53   | <a href="http://www.ncbi.nlm.nih.gov/entrez/query.fcgi?cmd=Retrieve&amp;db=pubmed&amp;dopt=Abstract&amp;list_uids=27318148">http://www.ncbi.nlm.nih.gov/entrez/query.fcgi?cmd=Retrieve&amp;db=pubmed&amp;dopt=Abstract&amp;list_uids=27318148</a>  6 Gastroent erology 151 3 Sep 2016 Journal Article |
| etv1   | kras   | <a href="http://www.ncbi.nlm.nih.gov/entrez/query.fcgi?cmd=Retrieve&amp;db=pubmed&amp;dopt=Abstract&amp;list_uids=27318148">http://www.ncbi.nlm.nih.gov/entrez/query.fcgi?cmd=Retrieve&amp;db=pubmed&amp;dopt=Abstract&amp;list_uids=27318148</a>  6 Gastroent erology 151 3 Sep 2016 Journal Article |
| has2   | sparc  | <a href="http://www.ncbi.nlm.nih.gov/entrez/query.fcgi?cmd=Retrieve&amp;db=pubmed&amp;dopt=Abstract&amp;list_uids=27318148">http://www.ncbi.nlm.nih.gov/entrez/query.fcgi?cmd=Retrieve&amp;db=pubmed&amp;dopt=Abstract&amp;list_uids=27318148</a>  6 Gastroent erology 151 3 Sep 2016 Journal Article |



|         |         |                                                                                                                                                                                                                                                                                                                                                                    |
|---------|---------|--------------------------------------------------------------------------------------------------------------------------------------------------------------------------------------------------------------------------------------------------------------------------------------------------------------------------------------------------------------------|
| has2    | tp53    | <a href="http://www.ncbi.nlm.nih.gov/entrez/query.fcgi?cmd=Retrieve&amp;db=pubmed&amp;dopt=Abstract&amp;list_uids=27318148">http://www.ncbi.nlm.nih.gov/entrez/query.fcgi?cmd=Retrieve&amp;db=pubmed&amp;dopt=Abstract&amp;list_uids=27318148</a>  6 Gastroenterology 151 3 Sep 2016 Journal Article                                                               |
| has2    | kras    | <a href="http://www.ncbi.nlm.nih.gov/entrez/query.fcgi?cmd=Retrieve&amp;db=pubmed&amp;dopt=Abstract&amp;list_uids=27318148">http://www.ncbi.nlm.nih.gov/entrez/query.fcgi?cmd=Retrieve&amp;db=pubmed&amp;dopt=Abstract&amp;list_uids=27318148</a>  6 Gastroenterology 151 3 Sep 2016 Journal Article                                                               |
| has2    | etv1    | <a href="http://www.ncbi.nlm.nih.gov/entrez/query.fcgi?cmd=Retrieve&amp;db=pubmed&amp;dopt=Abstract&amp;list_uids=27318148">http://www.ncbi.nlm.nih.gov/entrez/query.fcgi?cmd=Retrieve&amp;db=pubmed&amp;dopt=Abstract&amp;list_uids=27318148</a>  6 Gastroenterology 151 3 Sep 2016 Journal Article                                                               |
| pc-3    | rac1    | <a href="http://www.ncbi.nlm.nih.gov/entrez/query.fcgi?cmd=Retrieve&amp;db=pubmed&amp;dopt=Abstract&amp;list_uids=27320871">http://www.ncbi.nlm.nih.gov/entrez/query.fcgi?cmd=Retrieve&amp;db=pubmed&amp;dopt=Abstract&amp;list_uids=27320871</a>  6 Nan Fang Yi Ke Da Xue Xue Bao 36 6 Jun 2016 English Abstract,Journal Article,Research Support, Non-U.S. Gov't |
| pc-3    | dgcr14  | <a href="http://www.ncbi.nlm.nih.gov/entrez/query.fcgi?cmd=Retrieve&amp;db=pubmed&amp;dopt=Abstract&amp;list_uids=27446413">http://www.ncbi.nlm.nih.gov/entrez/query.fcgi?cmd=Retrieve&amp;db=pubmed&amp;dopt=Abstract&amp;list_uids=27446413</a>  6 Oncol Lett 12 2 Aug 2016 JOURNAL ARTICLE                                                                      |
| arf6    | pc-3    | <a href="http://www.ncbi.nlm.nih.gov/entrez/query.fcgi?cmd=Retrieve&amp;db=pubmed&amp;dopt=Abstract&amp;list_uids=27320871">http://www.ncbi.nlm.nih.gov/entrez/query.fcgi?cmd=Retrieve&amp;db=pubmed&amp;dopt=Abstract&amp;list_uids=27320871</a>  6 Nan Fang Yi Ke Da Xue Xue Bao 36 6 Jun 2016 English Abstract,Journal Article,Research Support, Non-U.S. Gov't |
| snord87 | pik3ca  | <a href="http://www.ncbi.nlm.nih.gov/entrez/query.fcgi?cmd=Retrieve&amp;db=pubmed&amp;dopt=Abstract&amp;list_uids=27394418">http://www.ncbi.nlm.nih.gov/entrez/query.fcgi?cmd=Retrieve&amp;db=pubmed&amp;dopt=Abstract&amp;list_uids=27394418</a>  6 Neurochem Res   Jul 2016 JOURNAL ARTICLE                                                                      |
| snord87 | mirn195 | <a href="http://www.ncbi.nlm.nih.gov/entrez/query.fcgi?cmd=Retrieve&amp;db=pubmed&amp;dopt=Abstract&amp;list_uids=27574009">http://www.ncbi.nlm.nih.gov/entrez/query.fcgi?cmd=Retrieve&amp;db=pubmed&amp;dopt=Abstract&amp;list_uids=27574009</a>  6 Oncol Rep   Aug 2016 JOURNAL ARTICLE                                                                          |
| snord87 | mirn204 | <a href="http://www.ncbi.nlm.nih.gov/entrez/query.fcgi?cmd=Retrieve&amp;db=pubmed&amp;dopt=Abstract&amp;list_uids=27588402">http://www.ncbi.nlm.nih.gov/entrez/query.fcgi?cmd=Retrieve&amp;db=pubmed&amp;dopt=Abstract&amp;list_uids=27588402</a>  6 Oncotarget   Aug 2016 JOURNAL ARTICLE                                                                         |
| psip1   | snord87 | <a href="http://www.ncbi.nlm.nih.gov/entrez/query.fcgi?cmd=Retrieve&amp;db=pubmed&amp;dopt=Abstract&amp;list_uids=27320882">http://www.ncbi.nlm.nih.gov/entrez/query.fcgi?cmd=Retrieve&amp;db=pubmed&amp;dopt=Abstract&amp;list_uids=27320882</a>  6 Nan Fang Yi Ke Da Xue Xue Bao 36 6 Jun 2016 English Abstract,Journal Article,Research Support, Non-U.S. Gov't |
| sfrs1   | snord87 | <a href="http://www.ncbi.nlm.nih.gov/entrez/query.fcgi?cmd=Retrieve&amp;db=pubmed&amp;dopt=Abstract&amp;list_uids=27320882">http://www.ncbi.nlm.nih.gov/entrez/query.fcgi?cmd=Retrieve&amp;db=pubmed&amp;dopt=Abstract&amp;list_uids=27320882</a>  6 Nan Fang Yi Ke Da Xue Xue Bao 36 6 Jun 2016 English Abstract,Journal Article,Research Support, Non-U.S. Gov't |
| sfrs1   | psip1   | <a href="http://www.ncbi.nlm.nih.gov/entrez/query.fcgi?cmd=Retrieve&amp;db=pubmed&amp;dopt=Abstract&amp;list_uids=27320882">http://www.ncbi.nlm.nih.gov/entrez/query.fcgi?cmd=Retrieve&amp;db=pubmed&amp;dopt=Abstract&amp;list_uids=27320882</a>  6 Nan Fang Yi Ke Da Xue Xue Bao 36 6 Jun 2016 English Abstract,Journal Article,Research Support, Non-U.S. Gov't |
| ifrd1   | snord87 | <a href="http://www.ncbi.nlm.nih.gov/entrez/query.fcgi?cmd=Retrieve&amp;db=pubmed&amp;dopt=Abstract&amp;list_uids=27320882">http://www.ncbi.nlm.nih.gov/entrez/query.fcgi?cmd=Retrieve&amp;db=pubmed&amp;dopt=Abstract&amp;list_uids=27320882</a>  6 Nan Fang Yi Ke Da Xue Xue Bao 36 6 Jun 2016 English Abstract,Journal Article,Research Support, Non-U.S. Gov't |
| ifrd1   | psip1   | <a href="http://www.ncbi.nlm.nih.gov/entrez/query.fcgi?cmd=Retrieve&amp;db=pubmed&amp;dopt=Abstract&amp;list_uids=27320882">http://www.ncbi.nlm.nih.gov/entrez/query.fcgi?cmd=Retrieve&amp;db=pubmed&amp;dopt=Abstract&amp;list_uids=27320882</a>  6 Nan Fang Yi Ke Da Xue Xue Bao 36 6 Jun 2016 English Abstract,Journal Article,Research Support, Non-U.S. Gov't |
| ifrd1   | sfrs1   | <a href="http://www.ncbi.nlm.nih.gov/entrez/query.fcgi?cmd=Retrieve&amp;db=pubmed&amp;dopt=Abstract&amp;list_uids=27320882">http://www.ncbi.nlm.nih.gov/entrez/query.fcgi?cmd=Retrieve&amp;db=pubmed&amp;dopt=Abstract&amp;list_uids=27320882</a>  6 Nan Fang Yi Ke Da Xue Xue Bao 36 6 Jun 2016 English Abstract,Journal Article,Research Support, Non-U.S. Gov't |
| il10    | hla-e   | <a href="http://www.ncbi.nlm.nih.gov/entrez/query.fcgi?cmd=Retrieve&amp;db=pubmed&amp;dopt=Abstract&amp;list_uids=27322426">http://www.ncbi.nlm.nih.gov/entrez/query.fcgi?cmd=Retrieve&amp;db=pubmed&amp;dopt=Abstract&amp;list_uids=27322426</a>  6 Oncotarget et   Jun 2016 JOURNAL ARTICLE                                                                      |
| fbx120  | ephb2   | <a href="http://www.ncbi.nlm.nih.gov/entrez/query.fcgi?cmd=Retrieve&amp;db=pubmed&amp;dopt=Abstract&amp;list_uids=27322511">http://www.ncbi.nlm.nih.gov/entrez/query.fcgi?cmd=Retrieve&amp;db=pubmed&amp;dopt=Abstract&amp;list_uids=27322511</a>  6 Environ Toxicol   Jun 2016 JOURNAL ARTICLE                                                                    |
| plaur   | fpr1    | <a href="http://www.ncbi.nlm.nih.gov/entrez/query.fcgi?cmd=Retrieve&amp;db=pubmed&amp;dopt=Abstract&amp;list_uids=27323409">http://www.ncbi.nlm.nih.gov/entrez/query.fcgi?cmd=Retrieve&amp;db=pubmed&amp;dopt=Abstract&amp;list_uids=27323409</a>  6 Oncotarget et   Jun 2016 JOURNAL ARTICLE                                                                      |

|        |           |                                                                                                                                                                                                                                                                                                                        |
|--------|-----------|------------------------------------------------------------------------------------------------------------------------------------------------------------------------------------------------------------------------------------------------------------------------------------------------------------------------|
| plaur  | igf1r     | <a href="http://www.ncbi.nlm.nih.gov/entrez/query.fcgi?cmd=Retrieve&amp;db=pubmed&amp;dopt=Abstract&amp;list_uids=27502396">http://www.ncbi.nlm.nih.gov/entrez/query.fcgi?cmd=Retrieve&amp;db=pubmed&amp;dopt=Abstract&amp;list_uids=27502396</a>  6 BMC Cancer 16  2016 Journal Article                               |
| plaur  | serpine 1 | <a href="http://www.ncbi.nlm.nih.gov/entrez/query.fcgi?cmd=Retrieve&amp;db=pubmed&amp;dopt=Abstract&amp;list_uids=27502396">http://www.ncbi.nlm.nih.gov/entrez/query.fcgi?cmd=Retrieve&amp;db=pubmed&amp;dopt=Abstract&amp;list_uids=27502396</a>  6 BMC Cancer 16  2016 Journal Article                               |
| plaur  | akt1      | <a href="http://www.ncbi.nlm.nih.gov/entrez/query.fcgi?cmd=Retrieve&amp;db=pubmed&amp;dopt=Abstract&amp;list_uids=27602956">http://www.ncbi.nlm.nih.gov/entrez/query.fcgi?cmd=Retrieve&amp;db=pubmed&amp;dopt=Abstract&amp;list_uids=27602956</a>  6 Oncotarget  Sep 2016 JOURNAL ARTICLE                              |
| plaur  | pik3ca    | <a href="http://www.ncbi.nlm.nih.gov/entrez/query.fcgi?cmd=Retrieve&amp;db=pubmed&amp;dopt=Abstract&amp;list_uids=27602956">http://www.ncbi.nlm.nih.gov/entrez/query.fcgi?cmd=Retrieve&amp;db=pubmed&amp;dopt=Abstract&amp;list_uids=27602956</a>  6 Oncotarget  Sep 2016 JOURNAL ARTICLE                              |
| tug1   | xrcc1     | <a href="http://www.ncbi.nlm.nih.gov/entrez/query.fcgi?cmd=Retrieve&amp;db=pubmed&amp;dopt=Abstract&amp;list_uids=27323757">http://www.ncbi.nlm.nih.gov/entrez/query.fcgi?cmd=Retrieve&amp;db=pubmed&amp;dopt=Abstract&amp;list_uids=27323757</a>  6 J Mol Histol 47 4 Aug 2016 Journal Article                        |
| tes    | mapk1 4   | <a href="http://www.ncbi.nlm.nih.gov/entrez/query.fcgi?cmd=Retrieve&amp;db=pubmed&amp;dopt=Abstract&amp;list_uids=27323777">http://www.ncbi.nlm.nih.gov/entrez/query.fcgi?cmd=Retrieve&amp;db=pubmed&amp;dopt=Abstract&amp;list_uids=27323777</a>  6 Oncotarget  Jun 2016 JOURNAL ARTICLE                              |
| pak7   | itk       | <a href="http://www.ncbi.nlm.nih.gov/entrez/query.fcgi?cmd=Retrieve&amp;db=pubmed&amp;dopt=Abstract&amp;list_uids=27323857">http://www.ncbi.nlm.nih.gov/entrez/query.fcgi?cmd=Retrieve&amp;db=pubmed&amp;dopt=Abstract&amp;list_uids=27323857</a>  6 Oncotarget  Jun 2016 JOURNAL ARTICLE                              |
| cdkn1a | pak7      | <a href="http://www.ncbi.nlm.nih.gov/entrez/query.fcgi?cmd=Retrieve&amp;db=pubmed&amp;dopt=Abstract&amp;list_uids=27323857">http://www.ncbi.nlm.nih.gov/entrez/query.fcgi?cmd=Retrieve&amp;db=pubmed&amp;dopt=Abstract&amp;list_uids=27323857</a>  6 Oncotarget  Jun 2016 JOURNAL ARTICLE                              |
| cdkn1a | akt1      | <a href="http://www.ncbi.nlm.nih.gov/entrez/query.fcgi?cmd=Retrieve&amp;db=pubmed&amp;dopt=Abstract&amp;list_uids=27323857">http://www.ncbi.nlm.nih.gov/entrez/query.fcgi?cmd=Retrieve&amp;db=pubmed&amp;dopt=Abstract&amp;list_uids=27323857</a>  6 Oncotarget  Jun 2016 JOURNAL ARTICLE                              |
| cdkn1a | cdc42     | <a href="http://www.ncbi.nlm.nih.gov/entrez/query.fcgi?cmd=Retrieve&amp;db=pubmed&amp;dopt=Abstract&amp;list_uids=27323857">http://www.ncbi.nlm.nih.gov/entrez/query.fcgi?cmd=Retrieve&amp;db=pubmed&amp;dopt=Abstract&amp;list_uids=27323857</a>  6 Oncotarget  Jun 2016 JOURNAL ARTICLE                              |
| cdkn1a | prkch     | <a href="http://www.ncbi.nlm.nih.gov/entrez/query.fcgi?cmd=Retrieve&amp;db=pubmed&amp;dopt=Abstract&amp;list_uids=27351203">http://www.ncbi.nlm.nih.gov/entrez/query.fcgi?cmd=Retrieve&amp;db=pubmed&amp;dopt=Abstract&amp;list_uids=27351203</a>  6 PLoS One 11 6  2016 Journal Article                               |
| cdkn1a | bax       | <a href="http://www.ncbi.nlm.nih.gov/entrez/query.fcgi?cmd=Retrieve&amp;db=pubmed&amp;dopt=Abstract&amp;list_uids=27421660">http://www.ncbi.nlm.nih.gov/entrez/query.fcgi?cmd=Retrieve&amp;db=pubmed&amp;dopt=Abstract&amp;list_uids=27421660</a>  6 Acta Biochim Biophys Sin (Shanghai) 48 8 Aug 2016 Journal Article |
| cdkn1a | bcl2l1    | <a href="http://www.ncbi.nlm.nih.gov/entrez/query.fcgi?cmd=Retrieve&amp;db=pubmed&amp;dopt=Abstract&amp;list_uids=27421660">http://www.ncbi.nlm.nih.gov/entrez/query.fcgi?cmd=Retrieve&amp;db=pubmed&amp;dopt=Abstract&amp;list_uids=27421660</a>  6 Acta Biochim Biophys Sin (Shanghai) 48 8 Aug 2016 Journal Article |
| cdkn1a | bcl2      | <a href="http://www.ncbi.nlm.nih.gov/entrez/query.fcgi?cmd=Retrieve&amp;db=pubmed&amp;dopt=Abstract&amp;list_uids=27421660">http://www.ncbi.nlm.nih.gov/entrez/query.fcgi?cmd=Retrieve&amp;db=pubmed&amp;dopt=Abstract&amp;list_uids=27421660</a>  6 Acta Biochim Biophys Sin (Shanghai) 48 8 Aug 2016 Journal Article |
| cdkn1a | pak1      | <a href="http://www.ncbi.nlm.nih.gov/entrez/query.fcgi?cmd=Retrieve&amp;db=pubmed&amp;dopt=Abstract&amp;list_uids=27430434">http://www.ncbi.nlm.nih.gov/entrez/query.fcgi?cmd=Retrieve&amp;db=pubmed&amp;dopt=Abstract&amp;list_uids=27430434</a>  6 Mol Med Rep 14 3 Sep 2016 Journal Article                         |
| cdkn1a | rbp2      | <a href="http://www.ncbi.nlm.nih.gov/entrez/query.fcgi?cmd=Retrieve&amp;db=pubmed&amp;dopt=Abstract&amp;list_uids=27548814">http://www.ncbi.nlm.nih.gov/entrez/query.fcgi?cmd=Retrieve&amp;db=pubmed&amp;dopt=Abstract&amp;list_uids=27548814</a>  6 Oncogenesis 5 8  2016 Journal Article                             |
| cdkn1a | cdkn1c    | <a href="http://www.ncbi.nlm.nih.gov/entrez/query.fcgi?cmd=Retrieve&amp;db=pubmed&amp;dopt=Abstract&amp;list_uids=27548814">http://www.ncbi.nlm.nih.gov/entrez/query.fcgi?cmd=Retrieve&amp;db=pubmed&amp;dopt=Abstract&amp;list_uids=27548814</a>  6 Oncogenesis 5 8  2016 Journal Article                             |
| cdkn1a | ifi27     | <a href="http://www.ncbi.nlm.nih.gov/entrez/query.fcgi?cmd=Retrieve&amp;db=pubmed&amp;dopt=Abstract&amp;list_uids=27377307">http://www.ncbi.nlm.nih.gov/entrez/query.fcgi?cmd=Retrieve&amp;db=pubmed&amp;dopt=Abstract&amp;list_uids=27377307</a>  6 Sci Rep 6   2016 Journal                                          |

|          |           |                                                                                                                                                                                                                                                                                                               |
|----------|-----------|---------------------------------------------------------------------------------------------------------------------------------------------------------------------------------------------------------------------------------------------------------------------------------------------------------------|
|          |           | Article  <a href="http://www.ncbi.nlm.nih.gov/entrez/query.fcgi?cmd=Retrieve&amp;db=pubmed&amp;dopt=Abstract&amp;list_uids=27569589">http://www.ncbi.nlm.nih.gov/entrez/query.fcgi?cmd=Retrieve&amp;db=pubmed&amp;dopt=Abstract&amp;list_uids=27569589</a>  6 Life Sci  Aug 2016 JOURNAL ARTICLE              |
| il8rb    | mmp9      | <a href="http://www.ncbi.nlm.nih.gov/entrez/query.fcgi?cmd=Retrieve&amp;db=pubmed&amp;dopt=Abstract&amp;list_uids=27324095">http://www.ncbi.nlm.nih.gov/entrez/query.fcgi?cmd=Retrieve&amp;db=pubmed&amp;dopt=Abstract&amp;list_uids=27324095</a>  6 Placenta 43 Jul 2016 Journal Article                     |
| il8rb    | mmp2      | <a href="http://www.ncbi.nlm.nih.gov/entrez/query.fcgi?cmd=Retrieve&amp;db=pubmed&amp;dopt=Abstract&amp;list_uids=27324095">http://www.ncbi.nlm.nih.gov/entrez/query.fcgi?cmd=Retrieve&amp;db=pubmed&amp;dopt=Abstract&amp;list_uids=27324095</a>  6 Placenta 43 Jul 2016 Journal Article                     |
| il8rb    | akt1      | <a href="http://www.ncbi.nlm.nih.gov/entrez/query.fcgi?cmd=Retrieve&amp;db=pubmed&amp;dopt=Abstract&amp;list_uids=27324095">http://www.ncbi.nlm.nih.gov/entrez/query.fcgi?cmd=Retrieve&amp;db=pubmed&amp;dopt=Abstract&amp;list_uids=27324095</a>  6 Placenta 43 Jul 2016 Journal Article                     |
| il8rb    | msc       | <a href="http://www.ncbi.nlm.nih.gov/entrez/query.fcgi?cmd=Retrieve&amp;db=pubmed&amp;dopt=Abstract&amp;list_uids=27374099">http://www.ncbi.nlm.nih.gov/entrez/query.fcgi?cmd=Retrieve&amp;db=pubmed&amp;dopt=Abstract&amp;list_uids=27374099</a>  6 Oncotarget  Jun 2016 JOURNAL ARTICLE                     |
| hdac1    | bcl9      | <a href="http://www.ncbi.nlm.nih.gov/entrez/query.fcgi?cmd=Retrieve&amp;db=pubmed&amp;dopt=Abstract&amp;list_uids=27324116">http://www.ncbi.nlm.nih.gov/entrez/query.fcgi?cmd=Retrieve&amp;db=pubmed&amp;dopt=Abstract&amp;list_uids=27324116</a>  6 Cancer Sci  Jun 2016 JOURNAL ARTICLE                     |
| hdac1    | tmprss11d | <a href="http://www.ncbi.nlm.nih.gov/entrez/query.fcgi?cmd=Retrieve&amp;db=pubmed&amp;dopt=Abstract&amp;list_uids=27429844">http://www.ncbi.nlm.nih.gov/entrez/query.fcgi?cmd=Retrieve&amp;db=pubmed&amp;dopt=Abstract&amp;list_uids=27429844</a>  6 Am J Cancer Res 6 6  2016 Journal Article                |
| hdac1    | hdac8     | <a href="http://www.ncbi.nlm.nih.gov/entrez/query.fcgi?cmd=Retrieve&amp;db=pubmed&amp;dopt=Abstract&amp;list_uids=27429844">http://www.ncbi.nlm.nih.gov/entrez/query.fcgi?cmd=Retrieve&amp;db=pubmed&amp;dopt=Abstract&amp;list_uids=27429844</a>  6 Am J Cancer Res 6 6  2016 Journal Article                |
| hdac1    | hdac3     | <a href="http://www.ncbi.nlm.nih.gov/entrez/query.fcgi?cmd=Retrieve&amp;db=pubmed&amp;dopt=Abstract&amp;list_uids=27429844">http://www.ncbi.nlm.nih.gov/entrez/query.fcgi?cmd=Retrieve&amp;db=pubmed&amp;dopt=Abstract&amp;list_uids=27429844</a>  6 Am J Cancer Res 6 6  2016 Journal Article                |
| hdac1    | hdac2     | <a href="http://www.ncbi.nlm.nih.gov/entrez/query.fcgi?cmd=Retrieve&amp;db=pubmed&amp;dopt=Abstract&amp;list_uids=27429844">http://www.ncbi.nlm.nih.gov/entrez/query.fcgi?cmd=Retrieve&amp;db=pubmed&amp;dopt=Abstract&amp;list_uids=27429844</a>  6 Am J Cancer Res 6 6  2016 Journal Article                |
| 1.4.1.20 | bcl9      | <a href="http://www.ncbi.nlm.nih.gov/entrez/query.fcgi?cmd=Retrieve&amp;db=pubmed&amp;dopt=Abstract&amp;list_uids=27324116">http://www.ncbi.nlm.nih.gov/entrez/query.fcgi?cmd=Retrieve&amp;db=pubmed&amp;dopt=Abstract&amp;list_uids=27324116</a>  6 Cancer Sci  Jun 2016 JOURNAL ARTICLE                     |
| 1.4.1.20 | hdac1     | <a href="http://www.ncbi.nlm.nih.gov/entrez/query.fcgi?cmd=Retrieve&amp;db=pubmed&amp;dopt=Abstract&amp;list_uids=27324116">http://www.ncbi.nlm.nih.gov/entrez/query.fcgi?cmd=Retrieve&amp;db=pubmed&amp;dopt=Abstract&amp;list_uids=27324116</a>  6 Cancer Sci  Jun 2016 JOURNAL ARTICLE                     |
| 1.4.1.20 | pygo2     | <a href="http://www.ncbi.nlm.nih.gov/entrez/query.fcgi?cmd=Retrieve&amp;db=pubmed&amp;dopt=Abstract&amp;list_uids=27324116">http://www.ncbi.nlm.nih.gov/entrez/query.fcgi?cmd=Retrieve&amp;db=pubmed&amp;dopt=Abstract&amp;list_uids=27324116</a>  6 Cancer Sci  Jun 2016 JOURNAL ARTICLE                     |
| pygo2    | bcl9      | <a href="http://www.ncbi.nlm.nih.gov/entrez/query.fcgi?cmd=Retrieve&amp;db=pubmed&amp;dopt=Abstract&amp;list_uids=27324116">http://www.ncbi.nlm.nih.gov/entrez/query.fcgi?cmd=Retrieve&amp;db=pubmed&amp;dopt=Abstract&amp;list_uids=27324116</a>  6 Cancer Sci  Jun 2016 JOURNAL ARTICLE                     |
| pygo2    | hdac1     | <a href="http://www.ncbi.nlm.nih.gov/entrez/query.fcgi?cmd=Retrieve&amp;db=pubmed&amp;dopt=Abstract&amp;list_uids=27324116">http://www.ncbi.nlm.nih.gov/entrez/query.fcgi?cmd=Retrieve&amp;db=pubmed&amp;dopt=Abstract&amp;list_uids=27324116</a>  6 Cancer Sci  Jun 2016 JOURNAL ARTICLE                     |
| lats1    | yap1      | <a href="http://www.ncbi.nlm.nih.gov/entrez/query.fcgi?cmd=Retrieve&amp;db=pubmed&amp;dopt=Abstract&amp;list_uids=27325643">http://www.ncbi.nlm.nih.gov/entrez/query.fcgi?cmd=Retrieve&amp;db=pubmed&amp;dopt=Abstract&amp;list_uids=27325643</a>  6 Cancer Res 76 13 Jul 2016 Journal Article                |
| ctbs     | hla-g     | <a href="http://www.ncbi.nlm.nih.gov/entrez/query.fcgi?cmd=Retrieve&amp;db=pubmed&amp;dopt=Abstract&amp;list_uids=27325764">http://www.ncbi.nlm.nih.gov/entrez/query.fcgi?cmd=Retrieve&amp;db=pubmed&amp;dopt=Abstract&amp;list_uids=27325764</a>  6 Proc Natl Acad Sci U S A 113 27 Jul 2016 Journal Article |
| cd8a     | rln2      | <a href="http://www.ncbi.nlm.nih.gov/entrez/query.fcgi?cmd=Retrieve&amp;db=pubmed&amp;dopt=Abstract&amp;list_uids=27467944">http://www.ncbi.nlm.nih.gov/entrez/query.fcgi?cmd=Retrieve&amp;db=pubmed&amp;dopt=Abstract&amp;list_uids=27467944</a>  6 Oncoimmunology 5 5 May 2016 Journal Article              |

|         |         |                                                                                                                                                                                                                                                                                                                                                       |
|---------|---------|-------------------------------------------------------------------------------------------------------------------------------------------------------------------------------------------------------------------------------------------------------------------------------------------------------------------------------------------------------|
| cd4     | cd8a    | <a href="http://www.ncbi.nlm.nih.gov/entrez/query.fcgi?cmd=Retrieve&amp;db=pubmed&amp;dopt=Abstract&amp;list_uids=27328524">http://www.ncbi.nlm.nih.gov/entrez/query.fcgi?cmd=Retrieve&amp;db=pubmed&amp;dopt=Abstract&amp;list_uids=27328524</a>  6 Roum Arch Microbiol Immunol 74 3-4  2015 Journal Article,Research Support, Non-U.S. Gov't,Review |
| mirn19a | rhob    | <a href="http://www.ncbi.nlm.nih.gov/entrez/query.fcgi?cmd=Retrieve&amp;db=pubmed&amp;dopt=Abstract&amp;list_uids=27329239">http://www.ncbi.nlm.nih.gov/entrez/query.fcgi?cmd=Retrieve&amp;db=pubmed&amp;dopt=Abstract&amp;list_uids=27329239</a>  6 Neurosci Lett 628  Aug 2016 Journal Article                                                      |
| cd276   | mirn187 | <a href="http://www.ncbi.nlm.nih.gov/entrez/query.fcgi?cmd=Retrieve&amp;db=pubmed&amp;dopt=Abstract&amp;list_uids=27329595">http://www.ncbi.nlm.nih.gov/entrez/query.fcgi?cmd=Retrieve&amp;db=pubmed&amp;dopt=Abstract&amp;list_uids=27329595</a>  6 Oncotarget  Jun 2016 JOURNAL ARTICLE                                                             |
| slc16a4 | cma1    | <a href="http://www.ncbi.nlm.nih.gov/entrez/query.fcgi?cmd=Retrieve&amp;db=pubmed&amp;dopt=Abstract&amp;list_uids=27331625">http://www.ncbi.nlm.nih.gov/entrez/query.fcgi?cmd=Retrieve&amp;db=pubmed&amp;dopt=Abstract&amp;list_uids=27331625</a>  6 Oncotarget  Jun 2016 JOURNAL ARTICLE                                                             |
| cma1    | cltc    | <a href="http://www.ncbi.nlm.nih.gov/entrez/query.fcgi?cmd=Retrieve&amp;db=pubmed&amp;dopt=Abstract&amp;list_uids=27331625">http://www.ncbi.nlm.nih.gov/entrez/query.fcgi?cmd=Retrieve&amp;db=pubmed&amp;dopt=Abstract&amp;list_uids=27331625</a>  6 Oncotarget  Jun 2016 JOURNAL ARTICLE                                                             |
| cr1     | tnfsf13 | <a href="http://www.ncbi.nlm.nih.gov/entrez/query.fcgi?cmd=Retrieve&amp;db=pubmed&amp;dopt=Abstract&amp;list_uids=27333049">http://www.ncbi.nlm.nih.gov/entrez/query.fcgi?cmd=Retrieve&amp;db=pubmed&amp;dopt=Abstract&amp;list_uids=27333049</a>  6 EBioMedicine 9  Jul 2016 Journal Article                                                         |
| lamc2   | cdx2    | <a href="http://www.ncbi.nlm.nih.gov/entrez/query.fcgi?cmd=Retrieve&amp;db=pubmed&amp;dopt=Abstract&amp;list_uids=27333824">http://www.ncbi.nlm.nih.gov/entrez/query.fcgi?cmd=Retrieve&amp;db=pubmed&amp;dopt=Abstract&amp;list_uids=27333824</a>  6 J Cell Biochem  Jun 2016 JOURNAL ARTICLE                                                         |
| lbx1    | cdx2    | <a href="http://www.ncbi.nlm.nih.gov/entrez/query.fcgi?cmd=Retrieve&amp;db=pubmed&amp;dopt=Abstract&amp;list_uids=27333824">http://www.ncbi.nlm.nih.gov/entrez/query.fcgi?cmd=Retrieve&amp;db=pubmed&amp;dopt=Abstract&amp;list_uids=27333824</a>  6 J Cell Biochem  Jun 2016 JOURNAL ARTICLE                                                         |
| lbx1    | zeb2    | <a href="http://www.ncbi.nlm.nih.gov/entrez/query.fcgi?cmd=Retrieve&amp;db=pubmed&amp;dopt=Abstract&amp;list_uids=27347142">http://www.ncbi.nlm.nih.gov/entrez/query.fcgi?cmd=Retrieve&amp;db=pubmed&amp;dopt=Abstract&amp;list_uids=27347142</a>  6 Oncol Lett 12 1 Jul 2016 JOURNAL ARTICLE                                                         |
| lbx1    | itk     | <a href="http://www.ncbi.nlm.nih.gov/entrez/query.fcgi?cmd=Retrieve&amp;db=pubmed&amp;dopt=Abstract&amp;list_uids=27500490">http://www.ncbi.nlm.nih.gov/entrez/query.fcgi?cmd=Retrieve&amp;db=pubmed&amp;dopt=Abstract&amp;list_uids=27500490</a>  6 J Clin Invest 126 9 Sep 2016 Journal Article                                                     |
| lbx1    | zeb1    | <a href="http://www.ncbi.nlm.nih.gov/entrez/query.fcgi?cmd=Retrieve&amp;db=pubmed&amp;dopt=Abstract&amp;list_uids=27500490">http://www.ncbi.nlm.nih.gov/entrez/query.fcgi?cmd=Retrieve&amp;db=pubmed&amp;dopt=Abstract&amp;list_uids=27500490</a>  6 J Clin Invest 126 9 Sep 2016 Journal Article                                                     |
| ccr5    | atp8a2  | <a href="http://www.ncbi.nlm.nih.gov/entrez/query.fcgi?cmd=Retrieve&amp;db=pubmed&amp;dopt=Abstract&amp;list_uids=27335323">http://www.ncbi.nlm.nih.gov/entrez/query.fcgi?cmd=Retrieve&amp;db=pubmed&amp;dopt=Abstract&amp;list_uids=27335323</a>  6 Open Biol 6 6 Jun 2016 Journal Article                                                           |
| cc15    | atp8a2  | <a href="http://www.ncbi.nlm.nih.gov/entrez/query.fcgi?cmd=Retrieve&amp;db=pubmed&amp;dopt=Abstract&amp;list_uids=27335323">http://www.ncbi.nlm.nih.gov/entrez/query.fcgi?cmd=Retrieve&amp;db=pubmed&amp;dopt=Abstract&amp;list_uids=27335323</a>  6 Open Biol 6 6 Jun 2016 Journal Article                                                           |
| cc15    | frap1   | <a href="http://www.ncbi.nlm.nih.gov/entrez/query.fcgi?cmd=Retrieve&amp;db=pubmed&amp;dopt=Abstract&amp;list_uids=27335323">http://www.ncbi.nlm.nih.gov/entrez/query.fcgi?cmd=Retrieve&amp;db=pubmed&amp;dopt=Abstract&amp;list_uids=27335323</a>  6 Open Biol 6 6 Jun 2016 Journal Article                                                           |
| cc15    | ccr5    | <a href="http://www.ncbi.nlm.nih.gov/entrez/query.fcgi?cmd=Retrieve&amp;db=pubmed&amp;dopt=Abstract&amp;list_uids=27335323">http://www.ncbi.nlm.nih.gov/entrez/query.fcgi?cmd=Retrieve&amp;db=pubmed&amp;dopt=Abstract&amp;list_uids=27335323</a>  6 Open Biol 6 6 Jun 2016 Journal Article                                                           |
| nupr1   | hcc     | <a href="http://www.ncbi.nlm.nih.gov/entrez/query.fcgi?cmd=Retrieve&amp;db=pubmed&amp;dopt=Abstract&amp;list_uids=27336713">http://www.ncbi.nlm.nih.gov/entrez/query.fcgi?cmd=Retrieve&amp;db=pubmed&amp;dopt=Abstract&amp;list_uids=27336713</a>  6 Cell Death Dis 7 6  2016 Journal Article                                                         |
| runx2   | hcc     | <a href="http://www.ncbi.nlm.nih.gov/entrez/query.fcgi?cmd=Retrieve&amp;db=pubmed&amp;dopt=Abstract&amp;list_uids=27336713">http://www.ncbi.nlm.nih.gov/entrez/query.fcgi?cmd=Retrieve&amp;db=pubmed&amp;dopt=Abstract&amp;list_uids=27336713</a>  6 Cell Death Dis 7 6  2016 Journal Article                                                         |
| runx2   | nupr1   | <a href="http://www.ncbi.nlm.nih.gov/entrez/query.fcgi?cmd=Retrieve&amp;db=pubmed&amp;dopt=Abstract&amp;list_uids=27336713">http://www.ncbi.nlm.nih.gov/entrez/query.fcgi?cmd=Retrieve&amp;db=pubmed&amp;dopt=Abstract&amp;list_uids=27336713</a>  6 Cell Death Dis 7 6  2016 Journal Article                                                         |

|      |         |                                                                                                                                                                                                                                                                                                                                                                                                                                                                                                                                                                                                                                                                                                                                                                                                                                                                                                                                                                                                                                                                                                                                                                                                          |
|------|---------|----------------------------------------------------------------------------------------------------------------------------------------------------------------------------------------------------------------------------------------------------------------------------------------------------------------------------------------------------------------------------------------------------------------------------------------------------------------------------------------------------------------------------------------------------------------------------------------------------------------------------------------------------------------------------------------------------------------------------------------------------------------------------------------------------------------------------------------------------------------------------------------------------------------------------------------------------------------------------------------------------------------------------------------------------------------------------------------------------------------------------------------------------------------------------------------------------------|
| ier3 | hcc     | <a href="http://www.ncbi.nlm.nih.gov/entrez/query.fcgi?cmd=Retrieve&amp;db=pubmed&amp;dopt=Abstract&amp;list_uids=27336713">http://www.ncbi.nlm.nih.gov/entrez/query.fcgi?cmd=Retrieve&amp;db=pubmed&amp;dopt=Abstract&amp;list_uids=27336713</a>  6 Cell Death Dis 7 6  2016 Journal Article                                                                                                                                                                                                                                                                                                                                                                                                                                                                                                                                                                                                                                                                                                                                                                                                                                                                                                            |
| relb | hcc     | <a href="http://www.ncbi.nlm.nih.gov/entrez/query.fcgi?cmd=Retrieve&amp;db=pubmed&amp;dopt=Abstract&amp;list_uids=27336713">http://www.ncbi.nlm.nih.gov/entrez/query.fcgi?cmd=Retrieve&amp;db=pubmed&amp;dopt=Abstract&amp;list_uids=27336713</a>  6 Cell Death Dis 7 6  2016 Journal Article                                                                                                                                                                                                                                                                                                                                                                                                                                                                                                                                                                                                                                                                                                                                                                                                                                                                                                            |
| relb | ier3    | <a href="http://www.ncbi.nlm.nih.gov/entrez/query.fcgi?cmd=Retrieve&amp;db=pubmed&amp;dopt=Abstract&amp;list_uids=27336713">http://www.ncbi.nlm.nih.gov/entrez/query.fcgi?cmd=Retrieve&amp;db=pubmed&amp;dopt=Abstract&amp;list_uids=27336713</a>  6 Cell Death Dis 7 6  2016 Journal Article                                                                                                                                                                                                                                                                                                                                                                                                                                                                                                                                                                                                                                                                                                                                                                                                                                                                                                            |
| pten | bax     | <a href="http://www.ncbi.nlm.nih.gov/entrez/query.fcgi?cmd=Retrieve&amp;db=pubmed&amp;dopt=Abstract&amp;list_uids=27421660">http://www.ncbi.nlm.nih.gov/entrez/query.fcgi?cmd=Retrieve&amp;db=pubmed&amp;dopt=Abstract&amp;list_uids=27421660</a>  6 Acta Biochim Biophys Sin (Shanghai) 48 8 Aug 2016 Journal Article                                                                                                                                                                                                                                                                                                                                                                                                                                                                                                                                                                                                                                                                                                                                                                                                                                                                                   |
| pten | bcl2l1  | <a href="http://www.ncbi.nlm.nih.gov/entrez/query.fcgi?cmd=Retrieve&amp;db=pubmed&amp;dopt=Abstract&amp;list_uids=27421660">http://www.ncbi.nlm.nih.gov/entrez/query.fcgi?cmd=Retrieve&amp;db=pubmed&amp;dopt=Abstract&amp;list_uids=27421660</a>  6 Acta Biochim Biophys Sin (Shanghai) 48 8 Aug 2016 Journal Article                                                                                                                                                                                                                                                                                                                                                                                                                                                                                                                                                                                                                                                                                                                                                                                                                                                                                   |
| pten | bcl2    | <a href="http://www.ncbi.nlm.nih.gov/entrez/query.fcgi?cmd=Retrieve&amp;db=pubmed&amp;dopt=Abstract&amp;list_uids=27421660">http://www.ncbi.nlm.nih.gov/entrez/query.fcgi?cmd=Retrieve&amp;db=pubmed&amp;dopt=Abstract&amp;list_uids=27421660</a>  6 Acta Biochim Biophys Sin (Shanghai) 48 8 Aug 2016 Journal Article                                                                                                                                                                                                                                                                                                                                                                                                                                                                                                                                                                                                                                                                                                                                                                                                                                                                                   |
| pten | cdkn1a  | <a href="http://www.ncbi.nlm.nih.gov/entrez/query.fcgi?cmd=Retrieve&amp;db=pubmed&amp;dopt=Abstract&amp;list_uids=27421660">http://www.ncbi.nlm.nih.gov/entrez/query.fcgi?cmd=Retrieve&amp;db=pubmed&amp;dopt=Abstract&amp;list_uids=27421660</a>  6 Acta Biochim Biophys Sin (Shanghai) 48 8 Aug 2016 Journal Article                                                                                                                                                                                                                                                                                                                                                                                                                                                                                                                                                                                                                                                                                                                                                                                                                                                                                   |
| pten | tp53    | <a href="http://www.ncbi.nlm.nih.gov/entrez/query.fcgi?cmd=Retrieve&amp;db=pubmed&amp;dopt=Abstract&amp;list_uids=27421660">http://www.ncbi.nlm.nih.gov/entrez/query.fcgi?cmd=Retrieve&amp;db=pubmed&amp;dopt=Abstract&amp;list_uids=27421660</a>  6 Acta Biochim Biophys Sin (Shanghai) 48 8 Aug 2016 Journal Article  <a href="http://www.ncbi.nlm.nih.gov/entrez/query.fcgi?cmd=Retrieve&amp;db=pubmed&amp;dopt=Abstract&amp;list_uids=27499479">http://www.ncbi.nlm.nih.gov/entrez/query.fcgi?cmd=Retrieve&amp;db=pubmed&amp;dopt=Abstract&amp;list_uids=27499479</a>  6 Int J Oncol   Aug 2016 JOURNAL ARTICLE                                                                                                                                                                                                                                                                                                                                                                                                                                                                                                                                                                                      |
| pten | frap1   | <a href="http://www.ncbi.nlm.nih.gov/entrez/query.fcgi?cmd=Retrieve&amp;db=pubmed&amp;dopt=Abstract&amp;list_uids=27499479">http://www.ncbi.nlm.nih.gov/entrez/query.fcgi?cmd=Retrieve&amp;db=pubmed&amp;dopt=Abstract&amp;list_uids=27499479</a>  6 Int J Oncol   Aug 2016 JOURNAL ARTICLE                                                                                                                                                                                                                                                                                                                                                                                                                                                                                                                                                                                                                                                                                                                                                                                                                                                                                                              |
| pten | mdm2    | <a href="http://www.ncbi.nlm.nih.gov/entrez/query.fcgi?cmd=Retrieve&amp;db=pubmed&amp;dopt=Abstract&amp;list_uids=27499479">http://www.ncbi.nlm.nih.gov/entrez/query.fcgi?cmd=Retrieve&amp;db=pubmed&amp;dopt=Abstract&amp;list_uids=27499479</a>  6 Int J Oncol   Aug 2016 JOURNAL ARTICLE                                                                                                                                                                                                                                                                                                                                                                                                                                                                                                                                                                                                                                                                                                                                                                                                                                                                                                              |
| pten | rela    | <a href="http://www.ncbi.nlm.nih.gov/entrez/query.fcgi?cmd=Retrieve&amp;db=pubmed&amp;dopt=Abstract&amp;list_uids=27533779">http://www.ncbi.nlm.nih.gov/entrez/query.fcgi?cmd=Retrieve&amp;db=pubmed&amp;dopt=Abstract&amp;list_uids=27533779</a>  6 Mol Carcinog   Aug 2016 JOURNAL ARTICLE                                                                                                                                                                                                                                                                                                                                                                                                                                                                                                                                                                                                                                                                                                                                                                                                                                                                                                             |
| pten | eif2ak3 | <a href="http://www.ncbi.nlm.nih.gov/entrez/query.fcgi?cmd=Retrieve&amp;db=pubmed&amp;dopt=Abstract&amp;list_uids=27533779">http://www.ncbi.nlm.nih.gov/entrez/query.fcgi?cmd=Retrieve&amp;db=pubmed&amp;dopt=Abstract&amp;list_uids=27533779</a>  6 Mol Carcinog   Aug 2016 JOURNAL ARTICLE                                                                                                                                                                                                                                                                                                                                                                                                                                                                                                                                                                                                                                                                                                                                                                                                                                                                                                             |
| pten | ephb2   | <a href="http://www.ncbi.nlm.nih.gov/entrez/query.fcgi?cmd=Retrieve&amp;db=pubmed&amp;dopt=Abstract&amp;list_uids=27533779">http://www.ncbi.nlm.nih.gov/entrez/query.fcgi?cmd=Retrieve&amp;db=pubmed&amp;dopt=Abstract&amp;list_uids=27533779</a>  6 Mol Carcinog   Aug 2016 JOURNAL ARTICLE                                                                                                                                                                                                                                                                                                                                                                                                                                                                                                                                                                                                                                                                                                                                                                                                                                                                                                             |
| pten | akt1    | <a href="http://www.ncbi.nlm.nih.gov/entrez/query.fcgi?cmd=Retrieve&amp;db=pubmed&amp;dopt=Abstract&amp;list_uids=27600360">http://www.ncbi.nlm.nih.gov/entrez/query.fcgi?cmd=Retrieve&amp;db=pubmed&amp;dopt=Abstract&amp;list_uids=27600360</a>  6 Cell Biol Int   Sep 2016 JOURNAL ARTICLE  <a href="http://www.ncbi.nlm.nih.gov/entrez/query.fcgi?cmd=Retrieve&amp;db=pubmed&amp;dopt=Abstract&amp;list_uids=27446408">http://www.ncbi.nlm.nih.gov/entrez/query.fcgi?cmd=Retrieve&amp;db=pubmed&amp;dopt=Abstract&amp;list_uids=27446408</a>  6 Oncol Lett 12 2 Aug 2016 JOURNAL ARTICLE  <a href="http://www.ncbi.nlm.nih.gov/entrez/query.fcgi?cmd=Retrieve&amp;db=pubmed&amp;dopt=Abstract&amp;list_uids=27499479">http://www.ncbi.nlm.nih.gov/entrez/query.fcgi?cmd=Retrieve&amp;db=pubmed&amp;dopt=Abstract&amp;list_uids=27499479</a>  6 Int J Oncol   Aug 2016 JOURNAL ARTICLE  <a href="http://www.ncbi.nlm.nih.gov/entrez/query.fcgi?cmd=Retrieve&amp;db=pubmed&amp;dopt=Abstract&amp;list_uids=27383307">http://www.ncbi.nlm.nih.gov/entrez/query.fcgi?cmd=Retrieve&amp;db=pubmed&amp;dopt=Abstract&amp;list_uids=27383307</a>  6 Eur Rev Med Pharmacol Sci 20 12 Jun 2016 Journal Article |

|         |        |                                                                                                                                                                                                                                                                                                                                                                                                                                                                                                                                                                                                                                                                                                                                                                                                                                                                                                            |
|---------|--------|------------------------------------------------------------------------------------------------------------------------------------------------------------------------------------------------------------------------------------------------------------------------------------------------------------------------------------------------------------------------------------------------------------------------------------------------------------------------------------------------------------------------------------------------------------------------------------------------------------------------------------------------------------------------------------------------------------------------------------------------------------------------------------------------------------------------------------------------------------------------------------------------------------|
| pten    | pik3ca | <a href="http://www.ncbi.nlm.nih.gov/entrez/query.fcgi?cmd=Retrieve&amp;db=pubmed&amp;dopt=Abstract&amp;list_uids=27600360">http://www.ncbi.nlm.nih.gov/entrez/query.fcgi?cmd=Retrieve&amp;db=pubmed&amp;dopt=Abstract&amp;list_uids=27600360</a>  6 Cell Biol Int  Sep 2016 JOURNAL ARTICLE  <a href="http://www.ncbi.nlm.nih.gov/entrez/query.fcgi?cmd=Retrieve&amp;db=pubmed&amp;dopt=Abstract&amp;list_uids=27446408">http://www.ncbi.nlm.nih.gov/entrez/query.fcgi?cmd=Retrieve&amp;db=pubmed&amp;dopt=Abstract&amp;list_uids=27446408</a>  6 Oncol Lett 12 2 Aug 2016 JOURNAL ARTICLE  <a href="http://www.ncbi.nlm.nih.gov/entrez/query.fcgi?cmd=Retrieve&amp;db=pubmed&amp;dopt=Abstract&amp;list_uids=27383307">http://www.ncbi.nlm.nih.gov/entrez/query.fcgi?cmd=Retrieve&amp;db=pubmed&amp;dopt=Abstract&amp;list_uids=27383307</a>  6 Eur Rev Med Pharmacol Sci 20 12 Jun 2016 Journal Article |
| mirn214 | pten   | <a href="http://www.ncbi.nlm.nih.gov/entrez/query.fcgi?cmd=Retrieve&amp;db=pubmed&amp;dopt=Abstract&amp;list_uids=27339596">http://www.ncbi.nlm.nih.gov/entrez/query.fcgi?cmd=Retrieve&amp;db=pubmed&amp;dopt=Abstract&amp;list_uids=27339596</a>  6 Clin Res Hepatol Gastroenterol  Jun 2016 JOURNAL ARTICLE                                                                                                                                                                                                                                                                                                                                                                                                                                                                                                                                                                                              |
| eif3h   | hcc    | <a href="http://www.ncbi.nlm.nih.gov/entrez/query.fcgi?cmd=Retrieve&amp;db=pubmed&amp;dopt=Abstract&amp;list_uids=27340783">http://www.ncbi.nlm.nih.gov/entrez/query.fcgi?cmd=Retrieve&amp;db=pubmed&amp;dopt=Abstract&amp;list_uids=27340783</a>  6 Oncotarget  Jun 2016 JOURNAL ARTICLE                                                                                                                                                                                                                                                                                                                                                                                                                                                                                                                                                                                                                  |
| pou5f1  | jun    | <a href="http://www.ncbi.nlm.nih.gov/entrez/query.fcgi?cmd=Retrieve&amp;db=pubmed&amp;dopt=Abstract&amp;list_uids=27341307">http://www.ncbi.nlm.nih.gov/entrez/query.fcgi?cmd=Retrieve&amp;db=pubmed&amp;dopt=Abstract&amp;list_uids=27341307</a>  6 Stem Cells  Jun 2016 JOURNAL ARTICLE                                                                                                                                                                                                                                                                                                                                                                                                                                                                                                                                                                                                                  |
| pou5f1  | stat3  | <a href="http://www.ncbi.nlm.nih.gov/entrez/query.fcgi?cmd=Retrieve&amp;db=pubmed&amp;dopt=Abstract&amp;list_uids=27472461">http://www.ncbi.nlm.nih.gov/entrez/query.fcgi?cmd=Retrieve&amp;db=pubmed&amp;dopt=Abstract&amp;list_uids=27472461</a>  6 Oncotarget  Jul 2016 JOURNAL ARTICLE                                                                                                                                                                                                                                                                                                                                                                                                                                                                                                                                                                                                                  |
| pou5f1  | sox2   | <a href="http://www.ncbi.nlm.nih.gov/entrez/query.fcgi?cmd=Retrieve&amp;db=pubmed&amp;dopt=Abstract&amp;list_uids=27472461">http://www.ncbi.nlm.nih.gov/entrez/query.fcgi?cmd=Retrieve&amp;db=pubmed&amp;dopt=Abstract&amp;list_uids=27472461</a>  6 Oncotarget  Jul 2016 JOURNAL ARTICLE                                                                                                                                                                                                                                                                                                                                                                                                                                                                                                                                                                                                                  |
| vcp     | stat3  | <a href="http://www.ncbi.nlm.nih.gov/entrez/query.fcgi?cmd=Retrieve&amp;db=pubmed&amp;dopt=Abstract&amp;list_uids=27344168">http://www.ncbi.nlm.nih.gov/entrez/query.fcgi?cmd=Retrieve&amp;db=pubmed&amp;dopt=Abstract&amp;list_uids=27344168</a>  6 Mol Cell Biochem 418 1-2 Jul 2016 Journal Article                                                                                                                                                                                                                                                                                                                                                                                                                                                                                                                                                                                                     |
| gabpa   | ngo1   | <a href="http://www.ncbi.nlm.nih.gov/entrez/query.fcgi?cmd=Retrieve&amp;db=pubmed&amp;dopt=Abstract&amp;list_uids=27459794">http://www.ncbi.nlm.nih.gov/entrez/query.fcgi?cmd=Retrieve&amp;db=pubmed&amp;dopt=Abstract&amp;list_uids=27459794</a>  6 Wei Sheng Yan Jiu 45 3 May 2016 English Abstract,Journal Article                                                                                                                                                                                                                                                                                                                                                                                                                                                                                                                                                                                      |
| gabpa   | hbe1   | <a href="http://www.ncbi.nlm.nih.gov/entrez/query.fcgi?cmd=Retrieve&amp;db=pubmed&amp;dopt=Abstract&amp;list_uids=27459794">http://www.ncbi.nlm.nih.gov/entrez/query.fcgi?cmd=Retrieve&amp;db=pubmed&amp;dopt=Abstract&amp;list_uids=27459794</a>  6 Wei Sheng Yan Jiu 45 3 May 2016 English Abstract,Journal Article                                                                                                                                                                                                                                                                                                                                                                                                                                                                                                                                                                                      |
| keap1   | gabpa  | <a href="http://www.ncbi.nlm.nih.gov/entrez/query.fcgi?cmd=Retrieve&amp;db=pubmed&amp;dopt=Abstract&amp;list_uids=27346396">http://www.ncbi.nlm.nih.gov/entrez/query.fcgi?cmd=Retrieve&amp;db=pubmed&amp;dopt=Abstract&amp;list_uids=27346396</a>  6 Zhonghua Zhong Liu Za Zhi 38 6 Jun 2016 English Abstract,Journal Article                                                                                                                                                                                                                                                                                                                                                                                                                                                                                                                                                                              |
| cct4    | gabpa  | <a href="http://www.ncbi.nlm.nih.gov/entrez/query.fcgi?cmd=Retrieve&amp;db=pubmed&amp;dopt=Abstract&amp;list_uids=27346396">http://www.ncbi.nlm.nih.gov/entrez/query.fcgi?cmd=Retrieve&amp;db=pubmed&amp;dopt=Abstract&amp;list_uids=27346396</a>  6 Zhonghua Zhong Liu Za Zhi 38 6 Jun 2016 English Abstract,Journal Article                                                                                                                                                                                                                                                                                                                                                                                                                                                                                                                                                                              |
| cct4    | keap1  | <a href="http://www.ncbi.nlm.nih.gov/entrez/query.fcgi?cmd=Retrieve&amp;db=pubmed&amp;dopt=Abstract&amp;list_uids=27346396">http://www.ncbi.nlm.nih.gov/entrez/query.fcgi?cmd=Retrieve&amp;db=pubmed&amp;dopt=Abstract&amp;list_uids=27346396</a>  6 Zhonghua Zhong Liu Za Zhi 38 6 Jun 2016 English Abstract,Journal Article                                                                                                                                                                                                                                                                                                                                                                                                                                                                                                                                                                              |
| sp1     | slc2a3 | <a href="http://www.ncbi.nlm.nih.gov/entrez/query.fcgi?cmd=Retrieve&amp;db=pubmed&amp;dopt=Abstract&amp;list_uids=27347112">http://www.ncbi.nlm.nih.gov/entrez/query.fcgi?cmd=Retrieve&amp;db=pubmed&amp;dopt=Abstract&amp;list_uids=27347112</a>  6 Oncol Lett 12 1 Jul 2016 JOURNAL ARTICLE                                                                                                                                                                                                                                                                                                                                                                                                                                                                                                                                                                                                              |
| sp1     | mmp9   | <a href="http://www.ncbi.nlm.nih.gov/entrez/query.fcgi?cmd=Retrieve&amp;db=pubmed&amp;dopt=Abstract&amp;list_uids=27573859">http://www.ncbi.nlm.nih.gov/entrez/query.fcgi?cmd=Retrieve&amp;db=pubmed&amp;dopt=Abstract&amp;list_uids=27573859</a>  6 Oncol Rep  Aug 2016 JOURNAL ARTICLE                                                                                                                                                                                                                                                                                                                                                                                                                                                                                                                                                                                                                   |
| ogt     | mgea5  | <a href="http://www.ncbi.nlm.nih.gov/entrez/query.fcgi?cmd=Retrieve&amp;db=pubmed&amp;dopt=Abstract&amp;list_uids=27347182">http://www.ncbi.nlm.nih.gov/entrez/query.fcgi?cmd=Retrieve&amp;db=pubmed&amp;dopt=Abstract&amp;list_uids=27347182</a>  6 Oncol Lett 12 1 Jul 2016 JOURNAL ARTICLE                                                                                                                                                                                                                                                                                                                                                                                                                                                                                                                                                                                                              |
| ogt     | ephb2  | <a href="http://www.ncbi.nlm.nih.gov/entrez/query.fcgi?cmd=Retrieve&amp;db=pubmed&amp;dopt=Abstract&amp;list_uids=27542217">http://www.ncbi.nlm.nih.gov/entrez/query.fcgi?cmd=Retrieve&amp;db=pubmed&amp;dopt=Abstract&amp;list_uids=27542217</a>  6 Oncotarget  Aug 2016 JOURNAL ARTICLE                                                                                                                                                                                                                                                                                                                                                                                                                                                                                                                                                                                                                  |

|         |          |                                                                                                                                                                                                                                                                                                                                                                                                                                                                                                                                                                                      |
|---------|----------|--------------------------------------------------------------------------------------------------------------------------------------------------------------------------------------------------------------------------------------------------------------------------------------------------------------------------------------------------------------------------------------------------------------------------------------------------------------------------------------------------------------------------------------------------------------------------------------|
| ogt     | cdk2     | <a href="http://www.ncbi.nlm.nih.gov/entrez/query.fcgi?cmd=Retrieve&amp;db=pubmed&amp;dopt=Abstract&amp;list_uids=27542217">http://www.ncbi.nlm.nih.gov/entrez/query.fcgi?cmd=Retrieve&amp;db=pubmed&amp;dopt=Abstract&amp;list_uids=27542217</a>  6 Oncotarget  Aug 2016 JOURNAL ARTICLE                                                                                                                                                                                                                                                                                            |
| mirn26b | mirn26a1 | <a href="http://www.ncbi.nlm.nih.gov/entrez/query.fcgi?cmd=Retrieve&amp;db=pubmed&amp;dopt=Abstract&amp;list_uids=27347306">http://www.ncbi.nlm.nih.gov/entrez/query.fcgi?cmd=Retrieve&amp;db=pubmed&amp;dopt=Abstract&amp;list_uids=27347306</a>  6 Am J Transl Res 8 5  2016 Journal Article                                                                                                                                                                                                                                                                                       |
| traf5   | mirn26a1 | <a href="http://www.ncbi.nlm.nih.gov/entrez/query.fcgi?cmd=Retrieve&amp;db=pubmed&amp;dopt=Abstract&amp;list_uids=27347306">http://www.ncbi.nlm.nih.gov/entrez/query.fcgi?cmd=Retrieve&amp;db=pubmed&amp;dopt=Abstract&amp;list_uids=27347306</a>  6 Am J Transl Res 8 5  2016 Journal Article                                                                                                                                                                                                                                                                                       |
| traf5   | mirn26b  | <a href="http://www.ncbi.nlm.nih.gov/entrez/query.fcgi?cmd=Retrieve&amp;db=pubmed&amp;dopt=Abstract&amp;list_uids=27347306">http://www.ncbi.nlm.nih.gov/entrez/query.fcgi?cmd=Retrieve&amp;db=pubmed&amp;dopt=Abstract&amp;list_uids=27347306</a>  6 Am J Transl Res 8 5  2016 Journal Article                                                                                                                                                                                                                                                                                       |
| atm     | smad2    | <a href="http://www.ncbi.nlm.nih.gov/entrez/query.fcgi?cmd=Retrieve&amp;db=pubmed&amp;dopt=Abstract&amp;list_uids=27347327">http://www.ncbi.nlm.nih.gov/entrez/query.fcgi?cmd=Retrieve&amp;db=pubmed&amp;dopt=Abstract&amp;list_uids=27347327</a>  6 Am J Transl Res 8 5  2016 Journal Article                                                                                                                                                                                                                                                                                       |
| s100a4  | mmp2     | <a href="http://www.ncbi.nlm.nih.gov/entrez/query.fcgi?cmd=Retrieve&amp;db=pubmed&amp;dopt=Abstract&amp;list_uids=27347327">http://www.ncbi.nlm.nih.gov/entrez/query.fcgi?cmd=Retrieve&amp;db=pubmed&amp;dopt=Abstract&amp;list_uids=27347327</a>  6 Am J Transl Res 8 5  2016 Journal Article                                                                                                                                                                                                                                                                                       |
| rassf10 | mmp2     | <a href="http://www.ncbi.nlm.nih.gov/entrez/query.fcgi?cmd=Retrieve&amp;db=pubmed&amp;dopt=Abstract&amp;list_uids=27348267">http://www.ncbi.nlm.nih.gov/entrez/query.fcgi?cmd=Retrieve&amp;db=pubmed&amp;dopt=Abstract&amp;list_uids=27348267</a>  6 Oncogenesis 5 6  2016 Journal Article                                                                                                                                                                                                                                                                                           |
| rassf10 | mapk14   | <a href="http://www.ncbi.nlm.nih.gov/entrez/query.fcgi?cmd=Retrieve&amp;db=pubmed&amp;dopt=Abstract&amp;list_uids=27348267">http://www.ncbi.nlm.nih.gov/entrez/query.fcgi?cmd=Retrieve&amp;db=pubmed&amp;dopt=Abstract&amp;list_uids=27348267</a>  6 Oncogenesis 5 6  2016 Journal Article                                                                                                                                                                                                                                                                                           |
| rassf10 | hcc      | <a href="http://www.ncbi.nlm.nih.gov/entrez/query.fcgi?cmd=Retrieve&amp;db=pubmed&amp;dopt=Abstract&amp;list_uids=27348267">http://www.ncbi.nlm.nih.gov/entrez/query.fcgi?cmd=Retrieve&amp;db=pubmed&amp;dopt=Abstract&amp;list_uids=27348267</a>  6 Oncogenesis 5 6  2016 Journal Article                                                                                                                                                                                                                                                                                           |
| rrm2    | akt1     | <a href="http://www.ncbi.nlm.nih.gov/entrez/query.fcgi?cmd=Retrieve&amp;db=pubmed&amp;dopt=Abstract&amp;list_uids=27348973">http://www.ncbi.nlm.nih.gov/entrez/query.fcgi?cmd=Retrieve&amp;db=pubmed&amp;dopt=Abstract&amp;list_uids=27348973</a>  6 Pharmazie 71 5 May 2016 Journal Article,Research Support, Non-U.S. Gov't                                                                                                                                                                                                                                                        |
| commd7  | mmp2     | <a href="http://www.ncbi.nlm.nih.gov/entrez/query.fcgi?cmd=Retrieve&amp;db=pubmed&amp;dopt=Abstract&amp;list_uids=27350032">http://www.ncbi.nlm.nih.gov/entrez/query.fcgi?cmd=Retrieve&amp;db=pubmed&amp;dopt=Abstract&amp;list_uids=27350032</a>  6 Mol Carcinog  Jun 2016 JOURNAL ARTICLE                                                                                                                                                                                                                                                                                          |
| commd7  | bax      | <a href="http://www.ncbi.nlm.nih.gov/entrez/query.fcgi?cmd=Retrieve&amp;db=pubmed&amp;dopt=Abstract&amp;list_uids=27350032">http://www.ncbi.nlm.nih.gov/entrez/query.fcgi?cmd=Retrieve&amp;db=pubmed&amp;dopt=Abstract&amp;list_uids=27350032</a>  6 Mol Carcinog  Jun 2016 JOURNAL ARTICLE                                                                                                                                                                                                                                                                                          |
| commd7  | bcl2     | <a href="http://www.ncbi.nlm.nih.gov/entrez/query.fcgi?cmd=Retrieve&amp;db=pubmed&amp;dopt=Abstract&amp;list_uids=27350032">http://www.ncbi.nlm.nih.gov/entrez/query.fcgi?cmd=Retrieve&amp;db=pubmed&amp;dopt=Abstract&amp;list_uids=27350032</a>  6 Mol Carcinog  Jun 2016 JOURNAL ARTICLE                                                                                                                                                                                                                                                                                          |
| bax     | bid      | <a href="http://www.ncbi.nlm.nih.gov/entrez/query.fcgi?cmd=Retrieve&amp;db=pubmed&amp;dopt=Abstract&amp;list_uids=27366113">http://www.ncbi.nlm.nih.gov/entrez/query.fcgi?cmd=Retrieve&amp;db=pubmed&amp;dopt=Abstract&amp;list_uids=27366113</a>  6 Cancer Cell Int 16   2016 Journal Article                                                                                                                                                                                                                                                                                       |
| bax     | eya1     | <a href="http://www.ncbi.nlm.nih.gov/entrez/query.fcgi?cmd=Retrieve&amp;db=pubmed&amp;dopt=Abstract&amp;list_uids=27531778">http://www.ncbi.nlm.nih.gov/entrez/query.fcgi?cmd=Retrieve&amp;db=pubmed&amp;dopt=Abstract&amp;list_uids=27531778</a>  6 Zhongguo Shi Yan Xue Ye Xue Za Zhi 24 4 Aug 2016 English Abstract,Journal Article                                                                                                                                                                                                                                               |
| bax     | parp1    | <a href="http://www.ncbi.nlm.nih.gov/entrez/query.fcgi?cmd=Retrieve&amp;db=pubmed&amp;dopt=Abstract&amp;list_uids=27580587">http://www.ncbi.nlm.nih.gov/entrez/query.fcgi?cmd=Retrieve&amp;db=pubmed&amp;dopt=Abstract&amp;list_uids=27580587</a>  6 Biofactor s  Sep 2016 JOURNAL ARTICLE                                                                                                                                                                                                                                                                                           |
| bax     | bcl2     | <a href="http://www.ncbi.nlm.nih.gov/entrez/query.fcgi?cmd=Retrieve&amp;db=pubmed&amp;dopt=Abstract&amp;list_uids=27429843">http://www.ncbi.nlm.nih.gov/entrez/query.fcgi?cmd=Retrieve&amp;db=pubmed&amp;dopt=Abstract&amp;list_uids=27429843</a>  6 Am J Cancer Res 6 6  2016 Journal Article  <a href="http://www.ncbi.nlm.nih.gov/entrez/query.fcgi?cmd=Retrieve&amp;db=pubmed&amp;dopt=Abstract&amp;list_uids=27600360">http://www.ncbi.nlm.nih.gov/entrez/query.fcgi?cmd=Retrieve&amp;db=pubmed&amp;dopt=Abstract&amp;list_uids=27600360</a>  6 Cell Biol Int  Sep 2016 JOURNAL |

|       |        |                                                                                                                                                                                                                                                                                                                                                                                                                                                                                                                                                                                                                                                                                                                                                                                                                                                                                                                                                                                                                                                                                                                                                                                                                                                                                                                                                                                                                                                                                                                                                                                                                                                                                                                                                                                                                                                                                                                                                                                                                                                                                                                                                                                                                                                                                                                                                                                                                                                                                             |
|-------|--------|---------------------------------------------------------------------------------------------------------------------------------------------------------------------------------------------------------------------------------------------------------------------------------------------------------------------------------------------------------------------------------------------------------------------------------------------------------------------------------------------------------------------------------------------------------------------------------------------------------------------------------------------------------------------------------------------------------------------------------------------------------------------------------------------------------------------------------------------------------------------------------------------------------------------------------------------------------------------------------------------------------------------------------------------------------------------------------------------------------------------------------------------------------------------------------------------------------------------------------------------------------------------------------------------------------------------------------------------------------------------------------------------------------------------------------------------------------------------------------------------------------------------------------------------------------------------------------------------------------------------------------------------------------------------------------------------------------------------------------------------------------------------------------------------------------------------------------------------------------------------------------------------------------------------------------------------------------------------------------------------------------------------------------------------------------------------------------------------------------------------------------------------------------------------------------------------------------------------------------------------------------------------------------------------------------------------------------------------------------------------------------------------------------------------------------------------------------------------------------------------|
|       |        | <p>ARTICLE <a href="http://www.ncbi.nlm.nih.gov/entrez/query.fcgi?cmd=Retrieve&amp;db=pubmed&amp;dopt=Abstract&amp;list_uids=27565846">http://www.ncbi.nlm.nih.gov/entrez/query.fcgi?cmd=Retrieve&amp;db=pubmed&amp;dopt=Abstract&amp;list_uids=27565846</a> 6 Biomed Pharmacother 83  Aug 2016 JOURNAL</p> <p>ARTICLE <a href="http://www.ncbi.nlm.nih.gov/entrez/query.fcgi?cmd=Retrieve&amp;db=pubmed&amp;dopt=Abstract&amp;list_uids=27366113">http://www.ncbi.nlm.nih.gov/entrez/query.fcgi?cmd=Retrieve&amp;db=pubmed&amp;dopt=Abstract&amp;list_uids=27366113</a> 6 Cancer Cell Int 16   2016 Journal Article <a href="http://www.ncbi.nlm.nih.gov/entrez/query.fcgi?cmd=Retrieve&amp;db=pubmed&amp;dopt=Abstract&amp;list_uids=27350032">http://www.ncbi.nlm.nih.gov/entrez/query.fcgi?cmd=Retrieve&amp;db=pubmed&amp;dopt=Abstract&amp;list_uids=27350032</a> 6 Mol Carcinog   Jun 2016 JOURNAL</p> <p>ARTICLE <a href="http://www.ncbi.nlm.nih.gov/entrez/query.fcgi?cmd=Retrieve&amp;db=pubmed&amp;dopt=Abstract&amp;list_uids=27421660">http://www.ncbi.nlm.nih.gov/entrez/query.fcgi?cmd=Retrieve&amp;db=pubmed&amp;dopt=Abstract&amp;list_uids=27421660</a> 6 Acta Biochim Biophys Sin (Shanghai) 48 8 Aug 2016 Journal Article <a href="http://www.ncbi.nlm.nih.gov/entrez/query.fcgi?cmd=Retrieve&amp;db=pubmed&amp;dopt=Abstract&amp;list_uids=27531778">http://www.ncbi.nlm.nih.gov/entrez/query.fcgi?cmd=Retrieve&amp;db=pubmed&amp;dopt=Abstract&amp;list_uids=27531778</a> 6 Zhongguo Shi Yan Xue Ye Xue Za Zhi 24 4 Aug 2016 English Abstract,Journal Article <a href="http://www.ncbi.nlm.nih.gov/entrez/query.fcgi?cmd=Retrieve&amp;db=pubmed&amp;dopt=Abstract&amp;list_uids=27470369">http://www.ncbi.nlm.nih.gov/entrez/query.fcgi?cmd=Retrieve&amp;db=pubmed&amp;dopt=Abstract&amp;list_uids=27470369</a> 6 Biomed Pharmacother 82  Aug 2016 Journal Article <a href="http://www.ncbi.nlm.nih.gov/entrez/query.fcgi?cmd=Retrieve&amp;db=pubmed&amp;dopt=Abstract&amp;list_uids=27470358">http://www.ncbi.nlm.nih.gov/entrez/query.fcgi?cmd=Retrieve&amp;db=pubmed&amp;dopt=Abstract&amp;list_uids=27470358</a> 6 Biomed Pharmacother 82  Aug 2016 Journal Article <a href="http://www.ncbi.nlm.nih.gov/entrez/query.fcgi?cmd=Retrieve&amp;db=pubmed&amp;dopt=Abstract&amp;list_uids=27580587">http://www.ncbi.nlm.nih.gov/entrez/query.fcgi?cmd=Retrieve&amp;db=pubmed&amp;dopt=Abstract&amp;list_uids=27580587</a> 6 Biofactors   Sep 2016 JOURNAL ARTICLE</p> |
| bcl2  | bid    | <a href="http://www.ncbi.nlm.nih.gov/entrez/query.fcgi?cmd=Retrieve&amp;db=pubmed&amp;dopt=Abstract&amp;list_uids=27366113">http://www.ncbi.nlm.nih.gov/entrez/query.fcgi?cmd=Retrieve&amp;db=pubmed&amp;dopt=Abstract&amp;list_uids=27366113</a>  6 Cancer Cell Int 16   2016 Journal Article                                                                                                                                                                                                                                                                                                                                                                                                                                                                                                                                                                                                                                                                                                                                                                                                                                                                                                                                                                                                                                                                                                                                                                                                                                                                                                                                                                                                                                                                                                                                                                                                                                                                                                                                                                                                                                                                                                                                                                                                                                                                                                                                                                                              |
| bcl2  | vegfa  | <a href="http://www.ncbi.nlm.nih.gov/entrez/query.fcgi?cmd=Retrieve&amp;db=pubmed&amp;dopt=Abstract&amp;list_uids=27415751">http://www.ncbi.nlm.nih.gov/entrez/query.fcgi?cmd=Retrieve&amp;db=pubmed&amp;dopt=Abstract&amp;list_uids=27415751</a>  6 Cancer Biol Ther   Jul 2016 JOURNAL ARTICLE                                                                                                                                                                                                                                                                                                                                                                                                                                                                                                                                                                                                                                                                                                                                                                                                                                                                                                                                                                                                                                                                                                                                                                                                                                                                                                                                                                                                                                                                                                                                                                                                                                                                                                                                                                                                                                                                                                                                                                                                                                                                                                                                                                                            |
| bcl2  | bcl2l1 | <p><a href="http://www.ncbi.nlm.nih.gov/entrez/query.fcgi?cmd=Retrieve&amp;db=pubmed&amp;dopt=Abstract&amp;list_uids=27415751">http://www.ncbi.nlm.nih.gov/entrez/query.fcgi?cmd=Retrieve&amp;db=pubmed&amp;dopt=Abstract&amp;list_uids=27415751</a> 6 Cancer Biol Ther   Jul 2016 JOURNAL</p> <p>ARTICLE <a href="http://www.ncbi.nlm.nih.gov/entrez/query.fcgi?cmd=Retrieve&amp;db=pubmed&amp;dopt=Abstract&amp;list_uids=27421660">http://www.ncbi.nlm.nih.gov/entrez/query.fcgi?cmd=Retrieve&amp;db=pubmed&amp;dopt=Abstract&amp;list_uids=27421660</a> 6 Acta Biochim Biophys Sin (Shanghai) 48 8 Aug 2016 Journal Article</p>                                                                                                                                                                                                                                                                                                                                                                                                                                                                                                                                                                                                                                                                                                                                                                                                                                                                                                                                                                                                                                                                                                                                                                                                                                                                                                                                                                                                                                                                                                                                                                                                                                                                                                                                                                                                                                                         |
| bcl2  | mmp9   | <a href="http://www.ncbi.nlm.nih.gov/entrez/query.fcgi?cmd=Retrieve&amp;db=pubmed&amp;dopt=Abstract&amp;list_uids=27470348">http://www.ncbi.nlm.nih.gov/entrez/query.fcgi?cmd=Retrieve&amp;db=pubmed&amp;dopt=Abstract&amp;list_uids=27470348</a>  6 Biomed Pharmacother 82  Aug 2016 Journal Article                                                                                                                                                                                                                                                                                                                                                                                                                                                                                                                                                                                                                                                                                                                                                                                                                                                                                                                                                                                                                                                                                                                                                                                                                                                                                                                                                                                                                                                                                                                                                                                                                                                                                                                                                                                                                                                                                                                                                                                                                                                                                                                                                                                       |
| bcl2  | mmp2   | <a href="http://www.ncbi.nlm.nih.gov/entrez/query.fcgi?cmd=Retrieve&amp;db=pubmed&amp;dopt=Abstract&amp;list_uids=27470348">http://www.ncbi.nlm.nih.gov/entrez/query.fcgi?cmd=Retrieve&amp;db=pubmed&amp;dopt=Abstract&amp;list_uids=27470348</a>  6 Biomed Pharmacother 82  Aug 2016 Journal Article                                                                                                                                                                                                                                                                                                                                                                                                                                                                                                                                                                                                                                                                                                                                                                                                                                                                                                                                                                                                                                                                                                                                                                                                                                                                                                                                                                                                                                                                                                                                                                                                                                                                                                                                                                                                                                                                                                                                                                                                                                                                                                                                                                                       |
| bcl2  | pcna   | <a href="http://www.ncbi.nlm.nih.gov/entrez/query.fcgi?cmd=Retrieve&amp;db=pubmed&amp;dopt=Abstract&amp;list_uids=27470348">http://www.ncbi.nlm.nih.gov/entrez/query.fcgi?cmd=Retrieve&amp;db=pubmed&amp;dopt=Abstract&amp;list_uids=27470348</a>  6 Biomed Pharmacother 82  Aug 2016 Journal Article                                                                                                                                                                                                                                                                                                                                                                                                                                                                                                                                                                                                                                                                                                                                                                                                                                                                                                                                                                                                                                                                                                                                                                                                                                                                                                                                                                                                                                                                                                                                                                                                                                                                                                                                                                                                                                                                                                                                                                                                                                                                                                                                                                                       |
| bcl2  | parp1  | <a href="http://www.ncbi.nlm.nih.gov/entrez/query.fcgi?cmd=Retrieve&amp;db=pubmed&amp;dopt=Abstract&amp;list_uids=27580587">http://www.ncbi.nlm.nih.gov/entrez/query.fcgi?cmd=Retrieve&amp;db=pubmed&amp;dopt=Abstract&amp;list_uids=27580587</a>  6 Biofactors   Sep 2016 JOURNAL ARTICLE                                                                                                                                                                                                                                                                                                                                                                                                                                                                                                                                                                                                                                                                                                                                                                                                                                                                                                                                                                                                                                                                                                                                                                                                                                                                                                                                                                                                                                                                                                                                                                                                                                                                                                                                                                                                                                                                                                                                                                                                                                                                                                                                                                                                  |
| prkch | uts2r  | <a href="http://www.ncbi.nlm.nih.gov/entrez/query.fcgi?cmd=Retrieve&amp;db=pubmed&amp;dopt=Abstract&amp;list_uids=27351203">http://www.ncbi.nlm.nih.gov/entrez/query.fcgi?cmd=Retrieve&amp;db=pubmed&amp;dopt=Abstract&amp;list_uids=27351203</a>  6 PLoS One 11 6  2016 Journal Article                                                                                                                                                                                                                                                                                                                                                                                                                                                                                                                                                                                                                                                                                                                                                                                                                                                                                                                                                                                                                                                                                                                                                                                                                                                                                                                                                                                                                                                                                                                                                                                                                                                                                                                                                                                                                                                                                                                                                                                                                                                                                                                                                                                                    |
| ednra | uts2r  | <a href="http://www.ncbi.nlm.nih.gov/entrez/query.fcgi?cmd=Retrieve&amp;db=pubmed&amp;dopt=Abstract&amp;list_uids=27351203">http://www.ncbi.nlm.nih.gov/entrez/query.fcgi?cmd=Retrieve&amp;db=pubmed&amp;dopt=Abstract&amp;list_uids=27351203</a>  6 PLoS One 11 6  2016 Journal Article                                                                                                                                                                                                                                                                                                                                                                                                                                                                                                                                                                                                                                                                                                                                                                                                                                                                                                                                                                                                                                                                                                                                                                                                                                                                                                                                                                                                                                                                                                                                                                                                                                                                                                                                                                                                                                                                                                                                                                                                                                                                                                                                                                                                    |



|         |        |                                                                                                                                                                                                                                                                                                                                      |
|---------|--------|--------------------------------------------------------------------------------------------------------------------------------------------------------------------------------------------------------------------------------------------------------------------------------------------------------------------------------------|
| ednra   | prkch  | <a href="http://www.ncbi.nlm.nih.gov/entrez/query.fcgi?cmd=Retrieve&amp;db=pubmed&amp;dopt=Abstract&amp;list_uids=27351203">http://www.ncbi.nlm.nih.gov/entrez/query.fcgi?cmd=Retrieve&amp;db=pubmed&amp;dopt=Abstract&amp;list_uids=27351203</a>  6 PLoS One 11 6 2016 Journal Article                                              |
| il17a   | stat3  | <a href="http://www.ncbi.nlm.nih.gov/entrez/query.fcgi?cmd=Retrieve&amp;db=pubmed&amp;dopt=Abstract&amp;list_uids=27353107">http://www.ncbi.nlm.nih.gov/entrez/query.fcgi?cmd=Retrieve&amp;db=pubmed&amp;dopt=Abstract&amp;list_uids=27353107</a>  6 Zhonghua Wei Chang Wai Ke Za Zhi 19 6 Jun 2016 English Abstract,Journal Article |
| hspb1   | hcc    | <a href="http://www.ncbi.nlm.nih.gov/entrez/query.fcgi?cmd=Retrieve&amp;db=pubmed&amp;dopt=Abstract&amp;list_uids=27354654">http://www.ncbi.nlm.nih.gov/entrez/query.fcgi?cmd=Retrieve&amp;db=pubmed&amp;dopt=Abstract&amp;list_uids=27354654</a>  6 Anticancer Res 36 7 Jul 2016 Journal Article                                    |
| ccr4    | mmp13  | <a href="http://www.ncbi.nlm.nih.gov/entrez/query.fcgi?cmd=Retrieve&amp;db=pubmed&amp;dopt=Abstract&amp;list_uids=27356745">http://www.ncbi.nlm.nih.gov/entrez/query.fcgi?cmd=Retrieve&amp;db=pubmed&amp;dopt=Abstract&amp;list_uids=27356745</a>  6 Oncotarget  Jun 2016 JOURNAL ARTICLE                                            |
| ccr4    | ephb2  | <a href="http://www.ncbi.nlm.nih.gov/entrez/query.fcgi?cmd=Retrieve&amp;db=pubmed&amp;dopt=Abstract&amp;list_uids=27356745">http://www.ncbi.nlm.nih.gov/entrez/query.fcgi?cmd=Retrieve&amp;db=pubmed&amp;dopt=Abstract&amp;list_uids=27356745</a>  6 Oncotarget  Jun 2016 JOURNAL ARTICLE                                            |
| opcml   | jag1   | <a href="http://www.ncbi.nlm.nih.gov/entrez/query.fcgi?cmd=Retrieve&amp;db=pubmed&amp;dopt=Abstract&amp;list_uids=27358143">http://www.ncbi.nlm.nih.gov/entrez/query.fcgi?cmd=Retrieve&amp;db=pubmed&amp;dopt=Abstract&amp;list_uids=27358143</a>  6 J Biol Regul Homeost Agents 30 2  2016 Journal Article                          |
| adamts5 | timp3  | <a href="http://www.ncbi.nlm.nih.gov/entrez/query.fcgi?cmd=Retrieve&amp;db=pubmed&amp;dopt=Abstract&amp;list_uids=27359117">http://www.ncbi.nlm.nih.gov/entrez/query.fcgi?cmd=Retrieve&amp;db=pubmed&amp;dopt=Abstract&amp;list_uids=27359117</a>  6 Pathobiology 83 6  2016 Journal Article                                         |
| fut1    | cxcr4  | <a href="http://www.ncbi.nlm.nih.gov/entrez/query.fcgi?cmd=Retrieve&amp;db=pubmed&amp;dopt=Abstract&amp;list_uids=27362846">http://www.ncbi.nlm.nih.gov/entrez/query.fcgi?cmd=Retrieve&amp;db=pubmed&amp;dopt=Abstract&amp;list_uids=27362846</a>  6 PLoS One 11 6  2016 Journal Article                                             |
| abl2    | vegfa  | <a href="http://www.ncbi.nlm.nih.gov/entrez/query.fcgi?cmd=Retrieve&amp;db=pubmed&amp;dopt=Abstract&amp;list_uids=27363017">http://www.ncbi.nlm.nih.gov/entrez/query.fcgi?cmd=Retrieve&amp;db=pubmed&amp;dopt=Abstract&amp;list_uids=27363017</a>  6 Oncotarget  May 2016 JOURNAL ARTICLE                                            |
| abl2    | mmp2   | <a href="http://www.ncbi.nlm.nih.gov/entrez/query.fcgi?cmd=Retrieve&amp;db=pubmed&amp;dopt=Abstract&amp;list_uids=27363017">http://www.ncbi.nlm.nih.gov/entrez/query.fcgi?cmd=Retrieve&amp;db=pubmed&amp;dopt=Abstract&amp;list_uids=27363017</a>  6 Oncotarget  May 2016 JOURNAL ARTICLE                                            |
| arg2    | vegfa  | <a href="http://www.ncbi.nlm.nih.gov/entrez/query.fcgi?cmd=Retrieve&amp;db=pubmed&amp;dopt=Abstract&amp;list_uids=27363017">http://www.ncbi.nlm.nih.gov/entrez/query.fcgi?cmd=Retrieve&amp;db=pubmed&amp;dopt=Abstract&amp;list_uids=27363017</a>  6 Oncotarget  May 2016 JOURNAL ARTICLE                                            |
| arg2    | abl2   | <a href="http://www.ncbi.nlm.nih.gov/entrez/query.fcgi?cmd=Retrieve&amp;db=pubmed&amp;dopt=Abstract&amp;list_uids=27363017">http://www.ncbi.nlm.nih.gov/entrez/query.fcgi?cmd=Retrieve&amp;db=pubmed&amp;dopt=Abstract&amp;list_uids=27363017</a>  6 Oncotarget  May 2016 JOURNAL ARTICLE                                            |
| arg2    | mmp2   | <a href="http://www.ncbi.nlm.nih.gov/entrez/query.fcgi?cmd=Retrieve&amp;db=pubmed&amp;dopt=Abstract&amp;list_uids=27363017">http://www.ncbi.nlm.nih.gov/entrez/query.fcgi?cmd=Retrieve&amp;db=pubmed&amp;dopt=Abstract&amp;list_uids=27363017</a>  6 Oncotarget  May 2016 JOURNAL ARTICLE                                            |
| mmp11   | rab27a | <a href="http://www.ncbi.nlm.nih.gov/entrez/query.fcgi?cmd=Retrieve&amp;db=pubmed&amp;dopt=Abstract&amp;list_uids=27364572">http://www.ncbi.nlm.nih.gov/entrez/query.fcgi?cmd=Retrieve&amp;db=pubmed&amp;dopt=Abstract&amp;list_uids=27364572</a>  6 Cancer Gene Ther 23 8 Aug 2016 Journal Article                                  |
| mirn145 | rab27a | <a href="http://www.ncbi.nlm.nih.gov/entrez/query.fcgi?cmd=Retrieve&amp;db=pubmed&amp;dopt=Abstract&amp;list_uids=27364572">http://www.ncbi.nlm.nih.gov/entrez/query.fcgi?cmd=Retrieve&amp;db=pubmed&amp;dopt=Abstract&amp;list_uids=27364572</a>  6 Cancer Gene Ther 23 8 Aug 2016 Journal Article                                  |
| mirn145 | mmp11  | <a href="http://www.ncbi.nlm.nih.gov/entrez/query.fcgi?cmd=Retrieve&amp;db=pubmed&amp;dopt=Abstract&amp;list_uids=27364572">http://www.ncbi.nlm.nih.gov/entrez/query.fcgi?cmd=Retrieve&amp;db=pubmed&amp;dopt=Abstract&amp;list_uids=27364572</a>  6 Cancer Gene Ther 23 8 Aug 2016 Journal Article                                  |
| mirn145 | muc13  | <a href="http://www.ncbi.nlm.nih.gov/entrez/query.fcgi?cmd=Retrieve&amp;db=pubmed&amp;dopt=Abstract&amp;list_uids=27507554">http://www.ncbi.nlm.nih.gov/entrez/query.fcgi?cmd=Retrieve&amp;db=pubmed&amp;dopt=Abstract&amp;list_uids=27507554</a>  6 J Gastrointest Surg  Aug 2016 JOURNAL ARTICLE                                   |
| mirn145 | muc3a  | <a href="http://www.ncbi.nlm.nih.gov/entrez/query.fcgi?cmd=Retrieve&amp;db=pubmed&amp;dopt=Abstract&amp;list_uids=27507554">http://www.ncbi.nlm.nih.gov/entrez/query.fcgi?cmd=Retrieve&amp;db=pubmed&amp;dopt=Abstract&amp;list_uids=27507554</a>  6 J Gastrointest Surg  Aug 2016 JOURNAL ARTICLE                                   |

|       |         |                                                                                                                                                                                                                                                                                                          |
|-------|---------|----------------------------------------------------------------------------------------------------------------------------------------------------------------------------------------------------------------------------------------------------------------------------------------------------------|
| dnmbp | ros1    | <a href="http://www.ncbi.nlm.nih.gov/entrez/query.fcgi?cmd=Retrieve&amp;db=pubmed&amp;dopt=Abstract&amp;list_uids=27366113">http://www.ncbi.nlm.nih.gov/entrez/query.fcgi?cmd=Retrieve&amp;db=pubmed&amp;dopt=Abstract&amp;list_uids=27366113</a>  6 Cancer Cell Int 16  2016 Journal Article            |
| tpt1  | mmp9    | <a href="http://www.ncbi.nlm.nih.gov/entrez/query.fcgi?cmd=Retrieve&amp;db=pubmed&amp;dopt=Abstract&amp;list_uids=27367023">http://www.ncbi.nlm.nih.gov/entrez/query.fcgi?cmd=Retrieve&amp;db=pubmed&amp;dopt=Abstract&amp;list_uids=27367023</a>  6 Oncotarget  Jun 2016 JOURNAL ARTICLE                |
| tpt1  | mapk8   | <a href="http://www.ncbi.nlm.nih.gov/entrez/query.fcgi?cmd=Retrieve&amp;db=pubmed&amp;dopt=Abstract&amp;list_uids=27367023">http://www.ncbi.nlm.nih.gov/entrez/query.fcgi?cmd=Retrieve&amp;db=pubmed&amp;dopt=Abstract&amp;list_uids=27367023</a>  6 Oncotarget  Jun 2016 JOURNAL ARTICLE                |
| tpt1  | cdc42   | <a href="http://www.ncbi.nlm.nih.gov/entrez/query.fcgi?cmd=Retrieve&amp;db=pubmed&amp;dopt=Abstract&amp;list_uids=27367023">http://www.ncbi.nlm.nih.gov/entrez/query.fcgi?cmd=Retrieve&amp;db=pubmed&amp;dopt=Abstract&amp;list_uids=27367023</a>  6 Oncotarget  Jun 2016 JOURNAL ARTICLE                |
| scaf1 | stat6   | <a href="http://www.ncbi.nlm.nih.gov/entrez/query.fcgi?cmd=Retrieve&amp;db=pubmed&amp;dopt=Abstract&amp;list_uids=27367025">http://www.ncbi.nlm.nih.gov/entrez/query.fcgi?cmd=Retrieve&amp;db=pubmed&amp;dopt=Abstract&amp;list_uids=27367025</a>  6 Oncotarget  Jun 2016 JOURNAL ARTICLE                |
| scaf1 | stat3   | <a href="http://www.ncbi.nlm.nih.gov/entrez/query.fcgi?cmd=Retrieve&amp;db=pubmed&amp;dopt=Abstract&amp;list_uids=27367025">http://www.ncbi.nlm.nih.gov/entrez/query.fcgi?cmd=Retrieve&amp;db=pubmed&amp;dopt=Abstract&amp;list_uids=27367025</a>  6 Oncotarget  Jun 2016 JOURNAL ARTICLE                |
| scaf1 | tam     | <a href="http://www.ncbi.nlm.nih.gov/entrez/query.fcgi?cmd=Retrieve&amp;db=pubmed&amp;dopt=Abstract&amp;list_uids=27367025">http://www.ncbi.nlm.nih.gov/entrez/query.fcgi?cmd=Retrieve&amp;db=pubmed&amp;dopt=Abstract&amp;list_uids=27367025</a>  6 Oncotarget  Jun 2016 JOURNAL ARTICLE                |
| hspa4 | scaf1   | <a href="http://www.ncbi.nlm.nih.gov/entrez/query.fcgi?cmd=Retrieve&amp;db=pubmed&amp;dopt=Abstract&amp;list_uids=27367025">http://www.ncbi.nlm.nih.gov/entrez/query.fcgi?cmd=Retrieve&amp;db=pubmed&amp;dopt=Abstract&amp;list_uids=27367025</a>  6 Oncotarget  Jun 2016 JOURNAL ARTICLE                |
| hspa4 | tnfsf13 | <a href="http://www.ncbi.nlm.nih.gov/entrez/query.fcgi?cmd=Retrieve&amp;db=pubmed&amp;dopt=Abstract&amp;list_uids=27367025">http://www.ncbi.nlm.nih.gov/entrez/query.fcgi?cmd=Retrieve&amp;db=pubmed&amp;dopt=Abstract&amp;list_uids=27367025</a>  6 Oncotarget  Jun 2016 JOURNAL ARTICLE                |
| stat6 | zeb1    | <a href="http://www.ncbi.nlm.nih.gov/entrez/query.fcgi?cmd=Retrieve&amp;db=pubmed&amp;dopt=Abstract&amp;list_uids=27533463">http://www.ncbi.nlm.nih.gov/entrez/query.fcgi?cmd=Retrieve&amp;db=pubmed&amp;dopt=Abstract&amp;list_uids=27533463</a>  6 Oncotarget  Aug 2016 JOURNAL ARTICLE                |
| stat6 | itk     | <a href="http://www.ncbi.nlm.nih.gov/entrez/query.fcgi?cmd=Retrieve&amp;db=pubmed&amp;dopt=Abstract&amp;list_uids=27533463">http://www.ncbi.nlm.nih.gov/entrez/query.fcgi?cmd=Retrieve&amp;db=pubmed&amp;dopt=Abstract&amp;list_uids=27533463</a>  6 Oncotarget  Aug 2016 JOURNAL ARTICLE                |
| stat6 | il13    | <a href="http://www.ncbi.nlm.nih.gov/entrez/query.fcgi?cmd=Retrieve&amp;db=pubmed&amp;dopt=Abstract&amp;list_uids=27533463">http://www.ncbi.nlm.nih.gov/entrez/query.fcgi?cmd=Retrieve&amp;db=pubmed&amp;dopt=Abstract&amp;list_uids=27533463</a>  6 Oncotarget  Aug 2016 JOURNAL ARTICLE                |
| tam   | stat6   | <a href="http://www.ncbi.nlm.nih.gov/entrez/query.fcgi?cmd=Retrieve&amp;db=pubmed&amp;dopt=Abstract&amp;list_uids=27367025">http://www.ncbi.nlm.nih.gov/entrez/query.fcgi?cmd=Retrieve&amp;db=pubmed&amp;dopt=Abstract&amp;list_uids=27367025</a>  6 Oncotarget  Jun 2016 JOURNAL ARTICLE                |
| tam   | stat3   | <a href="http://www.ncbi.nlm.nih.gov/entrez/query.fcgi?cmd=Retrieve&amp;db=pubmed&amp;dopt=Abstract&amp;list_uids=27367025">http://www.ncbi.nlm.nih.gov/entrez/query.fcgi?cmd=Retrieve&amp;db=pubmed&amp;dopt=Abstract&amp;list_uids=27367025</a>  6 Oncotarget  Jun 2016 JOURNAL ARTICLE                |
| tlr2  | tnfsf13 | <a href="http://www.ncbi.nlm.nih.gov/entrez/query.fcgi?cmd=Retrieve&amp;db=pubmed&amp;dopt=Abstract&amp;list_uids=27368535">http://www.ncbi.nlm.nih.gov/entrez/query.fcgi?cmd=Retrieve&amp;db=pubmed&amp;dopt=Abstract&amp;list_uids=27368535</a>  6 Fish Shellfish Immunol 56  Sep 2016 Journal Article |
| tlr2  | slc6a4  | <a href="http://www.ncbi.nlm.nih.gov/entrez/query.fcgi?cmd=Retrieve&amp;db=pubmed&amp;dopt=Abstract&amp;list_uids=27488594">http://www.ncbi.nlm.nih.gov/entrez/query.fcgi?cmd=Retrieve&amp;db=pubmed&amp;dopt=Abstract&amp;list_uids=27488594</a>  6 Microb Ecol  Aug 2016 JOURNAL ARTICLE               |
| tlr2  | tlr10   | <a href="http://www.ncbi.nlm.nih.gov/entrez/query.fcgi?cmd=Retrieve&amp;db=pubmed&amp;dopt=Abstract&amp;list_uids=27488594">http://www.ncbi.nlm.nih.gov/entrez/query.fcgi?cmd=Retrieve&amp;db=pubmed&amp;dopt=Abstract&amp;list_uids=27488594</a>  6 Microb Ecol  Aug 2016 JOURNAL ARTICLE               |
| tlr1  | tnfsf13 | <a href="http://www.ncbi.nlm.nih.gov/entrez/query.fcgi?cmd=Retrieve&amp;db=pubmed&amp;dopt=Abstract&amp;list_uids=27368535">http://www.ncbi.nlm.nih.gov/entrez/query.fcgi?cmd=Retrieve&amp;db=pubmed&amp;dopt=Abstract&amp;list_uids=27368535</a>  6 Fish Shellfish Immunol 56  Sep 2016 Journal Article |

|        |         |                                                                                                                                                                                                                                                                                                                               |
|--------|---------|-------------------------------------------------------------------------------------------------------------------------------------------------------------------------------------------------------------------------------------------------------------------------------------------------------------------------------|
| tlr1   | tlr2    | <a href="http://www.ncbi.nlm.nih.gov/entrez/query.fcgi?cmd=Retrieve&amp;db=pubmed&amp;dopt=Abstract&amp;list_uids=27368535">http://www.ncbi.nlm.nih.gov/entrez/query.fcgi?cmd=Retrieve&amp;db=pubmed&amp;dopt=Abstract&amp;list_uids=27368535</a>  6 Fish Shellfish Immunol 56  Sep 2016 JOURNAL ARTICLE                      |
| mmp15  | itk     | <a href="http://www.ncbi.nlm.nih.gov/entrez/query.fcgi?cmd=Retrieve&amp;db=pubmed&amp;dopt=Abstract&amp;list_uids=27374080">http://www.ncbi.nlm.nih.gov/entrez/query.fcgi?cmd=Retrieve&amp;db=pubmed&amp;dopt=Abstract&amp;list_uids=27374080</a>  6 Oncotarget  Jun 2016 JOURNAL ARTICLE                                     |
| il8ra  | msc     | <a href="http://www.ncbi.nlm.nih.gov/entrez/query.fcgi?cmd=Retrieve&amp;db=pubmed&amp;dopt=Abstract&amp;list_uids=27374099">http://www.ncbi.nlm.nih.gov/entrez/query.fcgi?cmd=Retrieve&amp;db=pubmed&amp;dopt=Abstract&amp;list_uids=27374099</a>  6 Oncotarget  Jun 2016 JOURNAL ARTICLE                                     |
| il8ra  | il8rb   | <a href="http://www.ncbi.nlm.nih.gov/entrez/query.fcgi?cmd=Retrieve&amp;db=pubmed&amp;dopt=Abstract&amp;list_uids=27374099">http://www.ncbi.nlm.nih.gov/entrez/query.fcgi?cmd=Retrieve&amp;db=pubmed&amp;dopt=Abstract&amp;list_uids=27374099</a>  6 Oncotarget  Jun 2016 JOURNAL ARTICLE                                     |
| il8ra  | il6     | <a href="http://www.ncbi.nlm.nih.gov/entrez/query.fcgi?cmd=Retrieve&amp;db=pubmed&amp;dopt=Abstract&amp;list_uids=27558278">http://www.ncbi.nlm.nih.gov/entrez/query.fcgi?cmd=Retrieve&amp;db=pubmed&amp;dopt=Abstract&amp;list_uids=27558278</a>  6 J Periodontal Res   Aug 2016 JOURNAL ARTICLE                             |
| il8ra  | il8     | <a href="http://www.ncbi.nlm.nih.gov/entrez/query.fcgi?cmd=Retrieve&amp;db=pubmed&amp;dopt=Abstract&amp;list_uids=27558278">http://www.ncbi.nlm.nih.gov/entrez/query.fcgi?cmd=Retrieve&amp;db=pubmed&amp;dopt=Abstract&amp;list_uids=27558278</a>  6 J Periodontal Res   Aug 2016 JOURNAL ARTICLE                             |
| il8ra  | ccl20   | <a href="http://www.ncbi.nlm.nih.gov/entrez/query.fcgi?cmd=Retrieve&amp;db=pubmed&amp;dopt=Abstract&amp;list_uids=27558278">http://www.ncbi.nlm.nih.gov/entrez/query.fcgi?cmd=Retrieve&amp;db=pubmed&amp;dopt=Abstract&amp;list_uids=27558278</a>  6 J Periodontal Res   Aug 2016 JOURNAL ARTICLE                             |
| il8ra  | tnfsf13 | <a href="http://www.ncbi.nlm.nih.gov/entrez/query.fcgi?cmd=Retrieve&amp;db=pubmed&amp;dopt=Abstract&amp;list_uids=27558278">http://www.ncbi.nlm.nih.gov/entrez/query.fcgi?cmd=Retrieve&amp;db=pubmed&amp;dopt=Abstract&amp;list_uids=27558278</a>  6 J Periodontal Res   Aug 2016 JOURNAL ARTICLE                             |
| igf1r  | mirn182 | <a href="http://www.ncbi.nlm.nih.gov/entrez/query.fcgi?cmd=Retrieve&amp;db=pubmed&amp;dopt=Abstract&amp;list_uids=27468875">http://www.ncbi.nlm.nih.gov/entrez/query.fcgi?cmd=Retrieve&amp;db=pubmed&amp;dopt=Abstract&amp;list_uids=27468875</a>  6 Neoplasma 63 5 Jul 2016 JOURNAL ARTICLE                                  |
| igf1r  | pik3ca  | <a href="http://www.ncbi.nlm.nih.gov/entrez/query.fcgi?cmd=Retrieve&amp;db=pubmed&amp;dopt=Abstract&amp;list_uids=27531475">http://www.ncbi.nlm.nih.gov/entrez/query.fcgi?cmd=Retrieve&amp;db=pubmed&amp;dopt=Abstract&amp;list_uids=27531475</a>  6 Zhonghua Zhong Liu Za Zhi 38 8 Aug 2016 English Abstract,Journal Article |
| insr   | igf1r   | <a href="http://www.ncbi.nlm.nih.gov/entrez/query.fcgi?cmd=Retrieve&amp;db=pubmed&amp;dopt=Abstract&amp;list_uids=27374103">http://www.ncbi.nlm.nih.gov/entrez/query.fcgi?cmd=Retrieve&amp;db=pubmed&amp;dopt=Abstract&amp;list_uids=27374103</a>  6 Oncotarget  Jun 2016 JOURNAL ARTICLE                                     |
| erbb4  | igf1r   | <a href="http://www.ncbi.nlm.nih.gov/entrez/query.fcgi?cmd=Retrieve&amp;db=pubmed&amp;dopt=Abstract&amp;list_uids=27374103">http://www.ncbi.nlm.nih.gov/entrez/query.fcgi?cmd=Retrieve&amp;db=pubmed&amp;dopt=Abstract&amp;list_uids=27374103</a>  6 Oncotarget  Jun 2016 JOURNAL ARTICLE                                     |
| erbb4  | insr    | <a href="http://www.ncbi.nlm.nih.gov/entrez/query.fcgi?cmd=Retrieve&amp;db=pubmed&amp;dopt=Abstract&amp;list_uids=27374103">http://www.ncbi.nlm.nih.gov/entrez/query.fcgi?cmd=Retrieve&amp;db=pubmed&amp;dopt=Abstract&amp;list_uids=27374103</a>  6 Oncotarget  Jun 2016 JOURNAL ARTICLE                                     |
| erbb4  | egfr    | <a href="http://www.ncbi.nlm.nih.gov/entrez/query.fcgi?cmd=Retrieve&amp;db=pubmed&amp;dopt=Abstract&amp;list_uids=27374103">http://www.ncbi.nlm.nih.gov/entrez/query.fcgi?cmd=Retrieve&amp;db=pubmed&amp;dopt=Abstract&amp;list_uids=27374103</a>  6 Oncotarget  Jun 2016 JOURNAL ARTICLE                                     |
| pdgfrb | pdgfb   | <a href="http://www.ncbi.nlm.nih.gov/entrez/query.fcgi?cmd=Retrieve&amp;db=pubmed&amp;dopt=Abstract&amp;list_uids=27374103">http://www.ncbi.nlm.nih.gov/entrez/query.fcgi?cmd=Retrieve&amp;db=pubmed&amp;dopt=Abstract&amp;list_uids=27374103</a>  6 Oncotarget  Jun 2016 JOURNAL ARTICLE                                     |
| pdgfrb | ptk2    | <a href="http://www.ncbi.nlm.nih.gov/entrez/query.fcgi?cmd=Retrieve&amp;db=pubmed&amp;dopt=Abstract&amp;list_uids=27374103">http://www.ncbi.nlm.nih.gov/entrez/query.fcgi?cmd=Retrieve&amp;db=pubmed&amp;dopt=Abstract&amp;list_uids=27374103</a>  6 Oncotarget  Jun 2016 JOURNAL ARTICLE                                     |
| colla1 | pdgfb   | <a href="http://www.ncbi.nlm.nih.gov/entrez/query.fcgi?cmd=Retrieve&amp;db=pubmed&amp;dopt=Abstract&amp;list_uids=27374103">http://www.ncbi.nlm.nih.gov/entrez/query.fcgi?cmd=Retrieve&amp;db=pubmed&amp;dopt=Abstract&amp;list_uids=27374103</a>  6 Oncotarget  Jun 2016 JOURNAL ARTICLE                                     |
| agrp   | ephb2   | <a href="http://www.ncbi.nlm.nih.gov/entrez/query.fcgi?cmd=Retrieve&amp;db=pubmed&amp;dopt=Abstract&amp;list_uids=27374177">http://www.ncbi.nlm.nih.gov/entrez/query.fcgi?cmd=Retrieve&amp;db=pubmed&amp;dopt=Abstract&amp;list_uids=27374177</a>  6 Oncotarget  Jun 2016 JOURNAL ARTICLE                                     |

|         |         |                                                                                                                                                                                                                                                                                                                          |
|---------|---------|--------------------------------------------------------------------------------------------------------------------------------------------------------------------------------------------------------------------------------------------------------------------------------------------------------------------------|
| agrp    | akt1    | <a href="http://www.ncbi.nlm.nih.gov/entrez/query.fcgi?cmd=Retrieve&amp;db=pubmed&amp;dopt=Abstract&amp;list_uids=27374177">http://www.ncbi.nlm.nih.gov/entrez/query.fcgi?cmd=Retrieve&amp;db=pubmed&amp;dopt=Abstract&amp;list_uids=27374177</a>  6 Oncotarget  Jun 2016 JOURNAL ARTICLE                                |
| art3    | ephb2   | <a href="http://www.ncbi.nlm.nih.gov/entrez/query.fcgi?cmd=Retrieve&amp;db=pubmed&amp;dopt=Abstract&amp;list_uids=27374177">http://www.ncbi.nlm.nih.gov/entrez/query.fcgi?cmd=Retrieve&amp;db=pubmed&amp;dopt=Abstract&amp;list_uids=27374177</a>  6 Oncotarget  Jun 2016 JOURNAL ARTICLE                                |
| art3    | akt1    | <a href="http://www.ncbi.nlm.nih.gov/entrez/query.fcgi?cmd=Retrieve&amp;db=pubmed&amp;dopt=Abstract&amp;list_uids=27374177">http://www.ncbi.nlm.nih.gov/entrez/query.fcgi?cmd=Retrieve&amp;db=pubmed&amp;dopt=Abstract&amp;list_uids=27374177</a>  6 Oncotarget  Jun 2016 JOURNAL ARTICLE                                |
| nkd2    | ervk2   | <a href="http://www.ncbi.nlm.nih.gov/entrez/query.fcgi?cmd=Retrieve&amp;db=pubmed&amp;dopt=Abstract&amp;list_uids=27374455">http://www.ncbi.nlm.nih.gov/entrez/query.fcgi?cmd=Retrieve&amp;db=pubmed&amp;dopt=Abstract&amp;list_uids=27374455</a>  6 J Thorac Oncol  Jun 2016 JOURNAL ARTICLE                            |
| ceacam5 | ceacam3 | <a href="http://www.ncbi.nlm.nih.gov/entrez/query.fcgi?cmd=Retrieve&amp;db=pubmed&amp;dopt=Abstract&amp;list_uids=27376801">http://www.ncbi.nlm.nih.gov/entrez/query.fcgi?cmd=Retrieve&amp;db=pubmed&amp;dopt=Abstract&amp;list_uids=27376801</a>  6 J Huazhong Univ Sci Technolog Med Sci 36 3 Jun 2016 Journal Article |
| ptx3    | plau    | <a href="http://www.ncbi.nlm.nih.gov/entrez/query.fcgi?cmd=Retrieve&amp;db=pubmed&amp;dopt=Abstract&amp;list_uids=27377307">http://www.ncbi.nlm.nih.gov/entrez/query.fcgi?cmd=Retrieve&amp;db=pubmed&amp;dopt=Abstract&amp;list_uids=27377307</a>  6 Sci Rep 6  2016 Journal Article                                     |
| ptx3    | mmp9    | <a href="http://www.ncbi.nlm.nih.gov/entrez/query.fcgi?cmd=Retrieve&amp;db=pubmed&amp;dopt=Abstract&amp;list_uids=27377307">http://www.ncbi.nlm.nih.gov/entrez/query.fcgi?cmd=Retrieve&amp;db=pubmed&amp;dopt=Abstract&amp;list_uids=27377307</a>  6 Sci Rep 6  2016 Journal Article                                     |
| ptx3    | mmp2    | <a href="http://www.ncbi.nlm.nih.gov/entrez/query.fcgi?cmd=Retrieve&amp;db=pubmed&amp;dopt=Abstract&amp;list_uids=27377307">http://www.ncbi.nlm.nih.gov/entrez/query.fcgi?cmd=Retrieve&amp;db=pubmed&amp;dopt=Abstract&amp;list_uids=27377307</a>  6 Sci Rep 6  2016 Journal Article                                     |
| ptx3    | ifi27   | <a href="http://www.ncbi.nlm.nih.gov/entrez/query.fcgi?cmd=Retrieve&amp;db=pubmed&amp;dopt=Abstract&amp;list_uids=27377307">http://www.ncbi.nlm.nih.gov/entrez/query.fcgi?cmd=Retrieve&amp;db=pubmed&amp;dopt=Abstract&amp;list_uids=27377307</a>  6 Sci Rep 6  2016 Journal Article                                     |
| ptx3    | cdkn1a  | <a href="http://www.ncbi.nlm.nih.gov/entrez/query.fcgi?cmd=Retrieve&amp;db=pubmed&amp;dopt=Abstract&amp;list_uids=27377307">http://www.ncbi.nlm.nih.gov/entrez/query.fcgi?cmd=Retrieve&amp;db=pubmed&amp;dopt=Abstract&amp;list_uids=27377307</a>  6 Sci Rep 6  2016 Journal Article                                     |
| ptx3    | cdc25c  | <a href="http://www.ncbi.nlm.nih.gov/entrez/query.fcgi?cmd=Retrieve&amp;db=pubmed&amp;dopt=Abstract&amp;list_uids=27377307">http://www.ncbi.nlm.nih.gov/entrez/query.fcgi?cmd=Retrieve&amp;db=pubmed&amp;dopt=Abstract&amp;list_uids=27377307</a>  6 Sci Rep 6  2016 Journal Article                                     |
| ptx3    | cdc2    | <a href="http://www.ncbi.nlm.nih.gov/entrez/query.fcgi?cmd=Retrieve&amp;db=pubmed&amp;dopt=Abstract&amp;list_uids=27377307">http://www.ncbi.nlm.nih.gov/entrez/query.fcgi?cmd=Retrieve&amp;db=pubmed&amp;dopt=Abstract&amp;list_uids=27377307</a>  6 Sci Rep 6  2016 Journal Article                                     |
| cdc25c  | ifi27   | <a href="http://www.ncbi.nlm.nih.gov/entrez/query.fcgi?cmd=Retrieve&amp;db=pubmed&amp;dopt=Abstract&amp;list_uids=27377307">http://www.ncbi.nlm.nih.gov/entrez/query.fcgi?cmd=Retrieve&amp;db=pubmed&amp;dopt=Abstract&amp;list_uids=27377307</a>  6 Sci Rep 6  2016 Journal Article                                     |
| cdc25c  | cdkn1a  | <a href="http://www.ncbi.nlm.nih.gov/entrez/query.fcgi?cmd=Retrieve&amp;db=pubmed&amp;dopt=Abstract&amp;list_uids=27377307">http://www.ncbi.nlm.nih.gov/entrez/query.fcgi?cmd=Retrieve&amp;db=pubmed&amp;dopt=Abstract&amp;list_uids=27377307</a>  6 Sci Rep 6  2016 Journal Article                                     |
| cdc2    | ifi27   | <a href="http://www.ncbi.nlm.nih.gov/entrez/query.fcgi?cmd=Retrieve&amp;db=pubmed&amp;dopt=Abstract&amp;list_uids=27377307">http://www.ncbi.nlm.nih.gov/entrez/query.fcgi?cmd=Retrieve&amp;db=pubmed&amp;dopt=Abstract&amp;list_uids=27377307</a>  6 Sci Rep 6  2016 Journal Article                                     |
| cdc2    | cdkn1a  | <a href="http://www.ncbi.nlm.nih.gov/entrez/query.fcgi?cmd=Retrieve&amp;db=pubmed&amp;dopt=Abstract&amp;list_uids=27377307">http://www.ncbi.nlm.nih.gov/entrez/query.fcgi?cmd=Retrieve&amp;db=pubmed&amp;dopt=Abstract&amp;list_uids=27377307</a>  6 Sci Rep 6  2016 Journal Article                                     |
| cdc2    | cdc25c  | <a href="http://www.ncbi.nlm.nih.gov/entrez/query.fcgi?cmd=Retrieve&amp;db=pubmed&amp;dopt=Abstract&amp;list_uids=27377307">http://www.ncbi.nlm.nih.gov/entrez/query.fcgi?cmd=Retrieve&amp;db=pubmed&amp;dopt=Abstract&amp;list_uids=27377307</a>  6 Sci Rep 6  2016 Journal Article                                     |
| cdc2    | wee1    | <a href="http://www.ncbi.nlm.nih.gov/entrez/query.fcgi?cmd=Retrieve&amp;db=pubmed&amp;dopt=Abstract&amp;list_uids=27501501">http://www.ncbi.nlm.nih.gov/entrez/query.fcgi?cmd=Retrieve&amp;db=pubmed&amp;dopt=Abstract&amp;list_uids=27501501</a>  6 Biomed Pharmacother 83  Aug 2016 JOURNAL ARTICLE                    |

|        |       |                                                                                                                                                                                                                                                                                                  |
|--------|-------|--------------------------------------------------------------------------------------------------------------------------------------------------------------------------------------------------------------------------------------------------------------------------------------------------|
| scrib  | hras  | <a href="http://www.ncbi.nlm.nih.gov/entrez/query.fcgi?cmd=Retrieve&amp;db=pubmed&amp;dopt=Abstract&amp;list_uids=27380321">http://www.ncbi.nlm.nih.gov/entrez/query.fcgi?cmd=Retrieve&amp;db=pubmed&amp;dopt=Abstract&amp;list_uids=27380321</a>  6 Nat Chem Biol 12 9 Sep 2016 Journal Article |
| scrib  | yap1  | <a href="http://www.ncbi.nlm.nih.gov/entrez/query.fcgi?cmd=Retrieve&amp;db=pubmed&amp;dopt=Abstract&amp;list_uids=27380321">http://www.ncbi.nlm.nih.gov/entrez/query.fcgi?cmd=Retrieve&amp;db=pubmed&amp;dopt=Abstract&amp;list_uids=27380321</a>  6 Nat Chem Biol 12 9 Sep 2016 Journal Article |
| zdhhc7 | hras  | <a href="http://www.ncbi.nlm.nih.gov/entrez/query.fcgi?cmd=Retrieve&amp;db=pubmed&amp;dopt=Abstract&amp;list_uids=27380321">http://www.ncbi.nlm.nih.gov/entrez/query.fcgi?cmd=Retrieve&amp;db=pubmed&amp;dopt=Abstract&amp;list_uids=27380321</a>  6 Nat Chem Biol 12 9 Sep 2016 Journal Article |
| zdhhc7 | yap1  | <a href="http://www.ncbi.nlm.nih.gov/entrez/query.fcgi?cmd=Retrieve&amp;db=pubmed&amp;dopt=Abstract&amp;list_uids=27380321">http://www.ncbi.nlm.nih.gov/entrez/query.fcgi?cmd=Retrieve&amp;db=pubmed&amp;dopt=Abstract&amp;list_uids=27380321</a>  6 Nat Chem Biol 12 9 Sep 2016 Journal Article |
| zdhhc7 | scrib | <a href="http://www.ncbi.nlm.nih.gov/entrez/query.fcgi?cmd=Retrieve&amp;db=pubmed&amp;dopt=Abstract&amp;list_uids=27380321">http://www.ncbi.nlm.nih.gov/entrez/query.fcgi?cmd=Retrieve&amp;db=pubmed&amp;dopt=Abstract&amp;list_uids=27380321</a>  6 Nat Chem Biol 12 9 Sep 2016 Journal Article |
| bmp1   | paep  | <a href="http://www.ncbi.nlm.nih.gov/entrez/query.fcgi?cmd=Retrieve&amp;db=pubmed&amp;dopt=Abstract&amp;list_uids=27384474">http://www.ncbi.nlm.nih.gov/entrez/query.fcgi?cmd=Retrieve&amp;db=pubmed&amp;dopt=Abstract&amp;list_uids=27384474</a>  6 Oncotarget  Feb 2016 JOURNAL ARTICLE        |
| sohlh2 | il8   | <a href="http://www.ncbi.nlm.nih.gov/entrez/query.fcgi?cmd=Retrieve&amp;db=pubmed&amp;dopt=Abstract&amp;list_uids=27384482">http://www.ncbi.nlm.nih.gov/entrez/query.fcgi?cmd=Retrieve&amp;db=pubmed&amp;dopt=Abstract&amp;list_uids=27384482</a>  6 Oncotarget  Jun 2016 JOURNAL ARTICLE        |
| sohlh2 | itk   | <a href="http://www.ncbi.nlm.nih.gov/entrez/query.fcgi?cmd=Retrieve&amp;db=pubmed&amp;dopt=Abstract&amp;list_uids=27384482">http://www.ncbi.nlm.nih.gov/entrez/query.fcgi?cmd=Retrieve&amp;db=pubmed&amp;dopt=Abstract&amp;list_uids=27384482</a>  6 Oncotarget  Jun 2016 JOURNAL ARTICLE        |
| fos    | axl   | <a href="http://www.ncbi.nlm.nih.gov/entrez/query.fcgi?cmd=Retrieve&amp;db=pubmed&amp;dopt=Abstract&amp;list_uids=27385093">http://www.ncbi.nlm.nih.gov/entrez/query.fcgi?cmd=Retrieve&amp;db=pubmed&amp;dopt=Abstract&amp;list_uids=27385093</a>  6 Oncotarget  Jul 2016 JOURNAL ARTICLE        |
| fos    | pcsk1 | <a href="http://www.ncbi.nlm.nih.gov/entrez/query.fcgi?cmd=Retrieve&amp;db=pubmed&amp;dopt=Abstract&amp;list_uids=27385093">http://www.ncbi.nlm.nih.gov/entrez/query.fcgi?cmd=Retrieve&amp;db=pubmed&amp;dopt=Abstract&amp;list_uids=27385093</a>  6 Oncotarget  Jul 2016 JOURNAL ARTICLE        |
| fos    | plau  | <a href="http://www.ncbi.nlm.nih.gov/entrez/query.fcgi?cmd=Retrieve&amp;db=pubmed&amp;dopt=Abstract&amp;list_uids=27385093">http://www.ncbi.nlm.nih.gov/entrez/query.fcgi?cmd=Retrieve&amp;db=pubmed&amp;dopt=Abstract&amp;list_uids=27385093</a>  6 Oncotarget  Jul 2016 JOURNAL ARTICLE        |
| fos    | jund  | <a href="http://www.ncbi.nlm.nih.gov/entrez/query.fcgi?cmd=Retrieve&amp;db=pubmed&amp;dopt=Abstract&amp;list_uids=27385093">http://www.ncbi.nlm.nih.gov/entrez/query.fcgi?cmd=Retrieve&amp;db=pubmed&amp;dopt=Abstract&amp;list_uids=27385093</a>  6 Oncotarget  Jul 2016 JOURNAL ARTICLE        |
| fos    | fosl2 | <a href="http://www.ncbi.nlm.nih.gov/entrez/query.fcgi?cmd=Retrieve&amp;db=pubmed&amp;dopt=Abstract&amp;list_uids=27604827">http://www.ncbi.nlm.nih.gov/entrez/query.fcgi?cmd=Retrieve&amp;db=pubmed&amp;dopt=Abstract&amp;list_uids=27604827</a>  6 Prostate  Sep 2016 JOURNAL ARTICLE          |
| fos    | fosl1 | <a href="http://www.ncbi.nlm.nih.gov/entrez/query.fcgi?cmd=Retrieve&amp;db=pubmed&amp;dopt=Abstract&amp;list_uids=27604827">http://www.ncbi.nlm.nih.gov/entrez/query.fcgi?cmd=Retrieve&amp;db=pubmed&amp;dopt=Abstract&amp;list_uids=27604827</a>  6 Prostate  Sep 2016 JOURNAL ARTICLE          |
| fos    | fosb  | <a href="http://www.ncbi.nlm.nih.gov/entrez/query.fcgi?cmd=Retrieve&amp;db=pubmed&amp;dopt=Abstract&amp;list_uids=27604827">http://www.ncbi.nlm.nih.gov/entrez/query.fcgi?cmd=Retrieve&amp;db=pubmed&amp;dopt=Abstract&amp;list_uids=27604827</a>  6 Prostate  Sep 2016 JOURNAL ARTICLE          |
| fos    | jund  | <a href="http://www.ncbi.nlm.nih.gov/entrez/query.fcgi?cmd=Retrieve&amp;db=pubmed&amp;dopt=Abstract&amp;list_uids=27604827">http://www.ncbi.nlm.nih.gov/entrez/query.fcgi?cmd=Retrieve&amp;db=pubmed&amp;dopt=Abstract&amp;list_uids=27604827</a>  6 Prostate  Sep 2016 JOURNAL ARTICLE          |
| fos    | junb  | <a href="http://www.ncbi.nlm.nih.gov/entrez/query.fcgi?cmd=Retrieve&amp;db=pubmed&amp;dopt=Abstract&amp;list_uids=27604827">http://www.ncbi.nlm.nih.gov/entrez/query.fcgi?cmd=Retrieve&amp;db=pubmed&amp;dopt=Abstract&amp;list_uids=27604827</a>  6 Prostate  Sep 2016 JOURNAL ARTICLE          |
| atf2   | axl   | <a href="http://www.ncbi.nlm.nih.gov/entrez/query.fcgi?cmd=Retrieve&amp;db=pubmed&amp;dopt=Abstract&amp;list_uids=27385093">http://www.ncbi.nlm.nih.gov/entrez/query.fcgi?cmd=Retrieve&amp;db=pubmed&amp;dopt=Abstract&amp;list_uids=27385093</a>  6 Oncotarget  Jul 2016 JOURNAL ARTICLE        |

|         |         |                                                                                                                                                                                                                                                                                                    |
|---------|---------|----------------------------------------------------------------------------------------------------------------------------------------------------------------------------------------------------------------------------------------------------------------------------------------------------|
| atf2    | fos     | <a href="http://www.ncbi.nlm.nih.gov/entrez/query.fcgi?cmd=Retrieve&amp;db=pubmed&amp;dopt=Abstract&amp;list_uids=27385093">http://www.ncbi.nlm.nih.gov/entrez/query.fcgi?cmd=Retrieve&amp;db=pubmed&amp;dopt=Abstract&amp;list_uids=27385093</a>  6 Oncotarget  Jul 2016 JOURNAL ARTICLE          |
| atf2    | snord87 | <a href="http://www.ncbi.nlm.nih.gov/entrez/query.fcgi?cmd=Retrieve&amp;db=pubmed&amp;dopt=Abstract&amp;list_uids=27588402">http://www.ncbi.nlm.nih.gov/entrez/query.fcgi?cmd=Retrieve&amp;db=pubmed&amp;dopt=Abstract&amp;list_uids=27588402</a>  6 Oncotarget  Aug 2016 JOURNAL ARTICLE          |
| tmprss4 | pcsk1   | <a href="http://www.ncbi.nlm.nih.gov/entrez/query.fcgi?cmd=Retrieve&amp;db=pubmed&amp;dopt=Abstract&amp;list_uids=27385093">http://www.ncbi.nlm.nih.gov/entrez/query.fcgi?cmd=Retrieve&amp;db=pubmed&amp;dopt=Abstract&amp;list_uids=27385093</a>  6 Oncotarget  Jul 2016 JOURNAL ARTICLE          |
| tmprss4 | plau    | <a href="http://www.ncbi.nlm.nih.gov/entrez/query.fcgi?cmd=Retrieve&amp;db=pubmed&amp;dopt=Abstract&amp;list_uids=27385093">http://www.ncbi.nlm.nih.gov/entrez/query.fcgi?cmd=Retrieve&amp;db=pubmed&amp;dopt=Abstract&amp;list_uids=27385093</a>  6 Oncotarget  Jul 2016 JOURNAL ARTICLE          |
| tmprss4 | jun     | <a href="http://www.ncbi.nlm.nih.gov/entrez/query.fcgi?cmd=Retrieve&amp;db=pubmed&amp;dopt=Abstract&amp;list_uids=27385093">http://www.ncbi.nlm.nih.gov/entrez/query.fcgi?cmd=Retrieve&amp;db=pubmed&amp;dopt=Abstract&amp;list_uids=27385093</a>  6 Oncotarget  Jul 2016 JOURNAL ARTICLE          |
| tmprss4 | itk     | <a href="http://www.ncbi.nlm.nih.gov/entrez/query.fcgi?cmd=Retrieve&amp;db=pubmed&amp;dopt=Abstract&amp;list_uids=27385093">http://www.ncbi.nlm.nih.gov/entrez/query.fcgi?cmd=Retrieve&amp;db=pubmed&amp;dopt=Abstract&amp;list_uids=27385093</a>  6 Oncotarget  Jul 2016 JOURNAL ARTICLE          |
| tmprss4 | fos     | <a href="http://www.ncbi.nlm.nih.gov/entrez/query.fcgi?cmd=Retrieve&amp;db=pubmed&amp;dopt=Abstract&amp;list_uids=27385093">http://www.ncbi.nlm.nih.gov/entrez/query.fcgi?cmd=Retrieve&amp;db=pubmed&amp;dopt=Abstract&amp;list_uids=27385093</a>  6 Oncotarget  Jul 2016 JOURNAL ARTICLE          |
| pcsk1   | ifi27   | <a href="http://www.ncbi.nlm.nih.gov/entrez/query.fcgi?cmd=Retrieve&amp;db=pubmed&amp;dopt=Abstract&amp;list_uids=27569589">http://www.ncbi.nlm.nih.gov/entrez/query.fcgi?cmd=Retrieve&amp;db=pubmed&amp;dopt=Abstract&amp;list_uids=27569589</a>  6 Life Sci  Aug 2016 JOURNAL ARTICLE            |
| pcsk1   | cdkn1a  | <a href="http://www.ncbi.nlm.nih.gov/entrez/query.fcgi?cmd=Retrieve&amp;db=pubmed&amp;dopt=Abstract&amp;list_uids=27569589">http://www.ncbi.nlm.nih.gov/entrez/query.fcgi?cmd=Retrieve&amp;db=pubmed&amp;dopt=Abstract&amp;list_uids=27569589</a>  6 Life Sci  Aug 2016 JOURNAL ARTICLE            |
| nampt   | xrcc1   | <a href="http://www.ncbi.nlm.nih.gov/entrez/query.fcgi?cmd=Retrieve&amp;db=pubmed&amp;dopt=Abstract&amp;list_uids=27390344">http://www.ncbi.nlm.nih.gov/entrez/query.fcgi?cmd=Retrieve&amp;db=pubmed&amp;dopt=Abstract&amp;list_uids=27390344</a>  6 Mol Cancer Ther 15 9 Sep 2016 Journal Article |
| nampt   | pak4    | <a href="http://www.ncbi.nlm.nih.gov/entrez/query.fcgi?cmd=Retrieve&amp;db=pubmed&amp;dopt=Abstract&amp;list_uids=27390344">http://www.ncbi.nlm.nih.gov/entrez/query.fcgi?cmd=Retrieve&amp;db=pubmed&amp;dopt=Abstract&amp;list_uids=27390344</a>  6 Mol Cancer Ther 15 9 Sep 2016 Journal Article |
| naprt1  | nampt   | <a href="http://www.ncbi.nlm.nih.gov/entrez/query.fcgi?cmd=Retrieve&amp;db=pubmed&amp;dopt=Abstract&amp;list_uids=27390344">http://www.ncbi.nlm.nih.gov/entrez/query.fcgi?cmd=Retrieve&amp;db=pubmed&amp;dopt=Abstract&amp;list_uids=27390344</a>  6 Mol Cancer Ther 15 9 Sep 2016 Journal Article |
| naprt1  | xrcc1   | <a href="http://www.ncbi.nlm.nih.gov/entrez/query.fcgi?cmd=Retrieve&amp;db=pubmed&amp;dopt=Abstract&amp;list_uids=27390344">http://www.ncbi.nlm.nih.gov/entrez/query.fcgi?cmd=Retrieve&amp;db=pubmed&amp;dopt=Abstract&amp;list_uids=27390344</a>  6 Mol Cancer Ther 15 9 Sep 2016 Journal Article |
| pak4    | myc     | <a href="http://www.ncbi.nlm.nih.gov/entrez/query.fcgi?cmd=Retrieve&amp;db=pubmed&amp;dopt=Abstract&amp;list_uids=27390344">http://www.ncbi.nlm.nih.gov/entrez/query.fcgi?cmd=Retrieve&amp;db=pubmed&amp;dopt=Abstract&amp;list_uids=27390344</a>  6 Mol Cancer Ther 15 9 Sep 2016 Journal Article |
| pak4    | xrcc1   | <a href="http://www.ncbi.nlm.nih.gov/entrez/query.fcgi?cmd=Retrieve&amp;db=pubmed&amp;dopt=Abstract&amp;list_uids=27390344">http://www.ncbi.nlm.nih.gov/entrez/query.fcgi?cmd=Retrieve&amp;db=pubmed&amp;dopt=Abstract&amp;list_uids=27390344</a>  6 Mol Cancer Ther 15 9 Sep 2016 Journal Article |
| ctgf    | plau    | <a href="http://www.ncbi.nlm.nih.gov/entrez/query.fcgi?cmd=Retrieve&amp;db=pubmed&amp;dopt=Abstract&amp;list_uids=27391090">http://www.ncbi.nlm.nih.gov/entrez/query.fcgi?cmd=Retrieve&amp;db=pubmed&amp;dopt=Abstract&amp;list_uids=27391090</a>  6 PLoS One 11 7  2016 Journal Article           |
| ctgf    | mapk14  | <a href="http://www.ncbi.nlm.nih.gov/entrez/query.fcgi?cmd=Retrieve&amp;db=pubmed&amp;dopt=Abstract&amp;list_uids=27403934">http://www.ncbi.nlm.nih.gov/entrez/query.fcgi?cmd=Retrieve&amp;db=pubmed&amp;dopt=Abstract&amp;list_uids=27403934</a>  6 Cancer Sci  Jul 2016 JOURNAL ARTICLE          |
| ccl2    | plau    | <a href="http://www.ncbi.nlm.nih.gov/entrez/query.fcgi?cmd=Retrieve&amp;db=pubmed&amp;dopt=Abstract&amp;list_uids=27391090">http://www.ncbi.nlm.nih.gov/entrez/query.fcgi?cmd=Retrieve&amp;db=pubmed&amp;dopt=Abstract&amp;list_uids=27391090</a>  6 PLoS One 11 7  2016 Journal Article           |

|           |           |                                                                                                                                                                                                                                                                                                             |
|-----------|-----------|-------------------------------------------------------------------------------------------------------------------------------------------------------------------------------------------------------------------------------------------------------------------------------------------------------------|
| ccl2      | ctgf      | <a href="http://www.ncbi.nlm.nih.gov/entrez/query.fcgi?cmd=Retrieve&amp;db=pubmed&amp;dopt=Abstract&amp;list_uids=27391090">http://www.ncbi.nlm.nih.gov/entrez/query.fcgi?cmd=Retrieve&amp;db=pubmed&amp;dopt=Abstract&amp;list_uids=27391090</a>  6 PLoS One 11 7  2016 Journal Article                    |
| ccl2      | rela      | <a href="http://www.ncbi.nlm.nih.gov/entrez/query.fcgi?cmd=Retrieve&amp;db=pubmed&amp;dopt=Abstract&amp;list_uids=27486225">http://www.ncbi.nlm.nih.gov/entrez/query.fcgi?cmd=Retrieve&amp;db=pubmed&amp;dopt=Abstract&amp;list_uids=27486225</a>  6 Mol Cancer Ther  Aug 2016 JOURNAL ARTICLE              |
| mmp1      | plau      | <a href="http://www.ncbi.nlm.nih.gov/entrez/query.fcgi?cmd=Retrieve&amp;db=pubmed&amp;dopt=Abstract&amp;list_uids=27391090">http://www.ncbi.nlm.nih.gov/entrez/query.fcgi?cmd=Retrieve&amp;db=pubmed&amp;dopt=Abstract&amp;list_uids=27391090</a>  6 PLoS One 11 7  2016 Journal Article                    |
| mmp1      | ctgf      | <a href="http://www.ncbi.nlm.nih.gov/entrez/query.fcgi?cmd=Retrieve&amp;db=pubmed&amp;dopt=Abstract&amp;list_uids=27391090">http://www.ncbi.nlm.nih.gov/entrez/query.fcgi?cmd=Retrieve&amp;db=pubmed&amp;dopt=Abstract&amp;list_uids=27391090</a>  6 PLoS One 11 7  2016 Journal Article                    |
| mmp1      | ccl2      | <a href="http://www.ncbi.nlm.nih.gov/entrez/query.fcgi?cmd=Retrieve&amp;db=pubmed&amp;dopt=Abstract&amp;list_uids=27391090">http://www.ncbi.nlm.nih.gov/entrez/query.fcgi?cmd=Retrieve&amp;db=pubmed&amp;dopt=Abstract&amp;list_uids=27391090</a>  6 PLoS One 11 7  2016 Journal Article                    |
| mmp1      | mmp13     | <a href="http://www.ncbi.nlm.nih.gov/entrez/query.fcgi?cmd=Retrieve&amp;db=pubmed&amp;dopt=Abstract&amp;list_uids=27491937">http://www.ncbi.nlm.nih.gov/entrez/query.fcgi?cmd=Retrieve&amp;db=pubmed&amp;dopt=Abstract&amp;list_uids=27491937</a>  6 Anticancer Agents Med Chem  Aug 2016 JOURNAL ARTICLE   |
| mmp1      | mmp8      | <a href="http://www.ncbi.nlm.nih.gov/entrez/query.fcgi?cmd=Retrieve&amp;db=pubmed&amp;dopt=Abstract&amp;list_uids=27491937">http://www.ncbi.nlm.nih.gov/entrez/query.fcgi?cmd=Retrieve&amp;db=pubmed&amp;dopt=Abstract&amp;list_uids=27491937</a>  6 Anticancer Agents Med Chem  Aug 2016 JOURNAL ARTICLE   |
| prame     | plau      | <a href="http://www.ncbi.nlm.nih.gov/entrez/query.fcgi?cmd=Retrieve&amp;db=pubmed&amp;dopt=Abstract&amp;list_uids=27391090">http://www.ncbi.nlm.nih.gov/entrez/query.fcgi?cmd=Retrieve&amp;db=pubmed&amp;dopt=Abstract&amp;list_uids=27391090</a>  6 PLoS One 11 7  2016 Journal Article                    |
| prame     | ctgf      | <a href="http://www.ncbi.nlm.nih.gov/entrez/query.fcgi?cmd=Retrieve&amp;db=pubmed&amp;dopt=Abstract&amp;list_uids=27391090">http://www.ncbi.nlm.nih.gov/entrez/query.fcgi?cmd=Retrieve&amp;db=pubmed&amp;dopt=Abstract&amp;list_uids=27391090</a>  6 PLoS One 11 7  2016 Journal Article                    |
| prame     | ccl2      | <a href="http://www.ncbi.nlm.nih.gov/entrez/query.fcgi?cmd=Retrieve&amp;db=pubmed&amp;dopt=Abstract&amp;list_uids=27391090">http://www.ncbi.nlm.nih.gov/entrez/query.fcgi?cmd=Retrieve&amp;db=pubmed&amp;dopt=Abstract&amp;list_uids=27391090</a>  6 PLoS One 11 7  2016 Journal Article                    |
| prame     | mmp1      | <a href="http://www.ncbi.nlm.nih.gov/entrez/query.fcgi?cmd=Retrieve&amp;db=pubmed&amp;dopt=Abstract&amp;list_uids=27391090">http://www.ncbi.nlm.nih.gov/entrez/query.fcgi?cmd=Retrieve&amp;db=pubmed&amp;dopt=Abstract&amp;list_uids=27391090</a>  6 PLoS One 11 7  2016 Journal Article                    |
| nf-kappab | rela      | <a href="http://www.ncbi.nlm.nih.gov/entrez/query.fcgi?cmd=Retrieve&amp;db=pubmed&amp;dopt=Abstract&amp;list_uids=27393618">http://www.ncbi.nlm.nih.gov/entrez/query.fcgi?cmd=Retrieve&amp;db=pubmed&amp;dopt=Abstract&amp;list_uids=27393618</a>  6 Breast Cancer Res Treat 158 3 Aug 2016 Journal Article |
| dusp4     | rela      | <a href="http://www.ncbi.nlm.nih.gov/entrez/query.fcgi?cmd=Retrieve&amp;db=pubmed&amp;dopt=Abstract&amp;list_uids=27393618">http://www.ncbi.nlm.nih.gov/entrez/query.fcgi?cmd=Retrieve&amp;db=pubmed&amp;dopt=Abstract&amp;list_uids=27393618</a>  6 Breast Cancer Res Treat 158 3 Aug 2016 Journal Article |
| dusp4     | nf-kappab | <a href="http://www.ncbi.nlm.nih.gov/entrez/query.fcgi?cmd=Retrieve&amp;db=pubmed&amp;dopt=Abstract&amp;list_uids=27393618">http://www.ncbi.nlm.nih.gov/entrez/query.fcgi?cmd=Retrieve&amp;db=pubmed&amp;dopt=Abstract&amp;list_uids=27393618</a>  6 Breast Cancer Res Treat 158 3 Aug 2016 Journal Article |
| dusp4     | mapk8     | <a href="http://www.ncbi.nlm.nih.gov/entrez/query.fcgi?cmd=Retrieve&amp;db=pubmed&amp;dopt=Abstract&amp;list_uids=27393618">http://www.ncbi.nlm.nih.gov/entrez/query.fcgi?cmd=Retrieve&amp;db=pubmed&amp;dopt=Abstract&amp;list_uids=27393618</a>  6 Breast Cancer Res Treat 158 3 Aug 2016 Journal Article |
| dusp4     | mapk14    | <a href="http://www.ncbi.nlm.nih.gov/entrez/query.fcgi?cmd=Retrieve&amp;db=pubmed&amp;dopt=Abstract&amp;list_uids=27393618">http://www.ncbi.nlm.nih.gov/entrez/query.fcgi?cmd=Retrieve&amp;db=pubmed&amp;dopt=Abstract&amp;list_uids=27393618</a>  6 Breast Cancer Res Treat 158 3 Aug 2016 Journal Article |
| dusp4     | mapk3     | <a href="http://www.ncbi.nlm.nih.gov/entrez/query.fcgi?cmd=Retrieve&amp;db=pubmed&amp;dopt=Abstract&amp;list_uids=27393618">http://www.ncbi.nlm.nih.gov/entrez/query.fcgi?cmd=Retrieve&amp;db=pubmed&amp;dopt=Abstract&amp;list_uids=27393618</a>  6 Breast Cancer Res Treat 158 3 Aug 2016 Journal Article |
| notch1    | mmp9      | <a href="http://www.ncbi.nlm.nih.gov/entrez/query.fcgi?cmd=Retrieve&amp;db=pubmed&amp;dopt=Abstract&amp;list_uids=27398151">http://www.ncbi.nlm.nih.gov/entrez/query.fcgi?cmd=Retrieve&amp;db=pubmed&amp;dopt=Abstract&amp;list_uids=27398151</a>  6 Am J Transl Res 8 6  2016 Journal Article              |

|         |         |                                                                                                                                                                                                                                                                                                                                         |
|---------|---------|-----------------------------------------------------------------------------------------------------------------------------------------------------------------------------------------------------------------------------------------------------------------------------------------------------------------------------------------|
| notch1  | gsc     | <a href="http://www.ncbi.nlm.nih.gov/entrez/query.fcgi?cmd=Retrieve&amp;db=pubmed&amp;dopt=Abstract&amp;list_uids=27472461">http://www.ncbi.nlm.nih.gov/entrez/query.fcgi?cmd=Retrieve&amp;db=pubmed&amp;dopt=Abstract&amp;list_uids=27472461</a>  6 Oncotarget  Jul 2016 JOURNAL ARTICLE                                               |
| notch1  | rbpj    | <a href="http://www.ncbi.nlm.nih.gov/entrez/query.fcgi?cmd=Retrieve&amp;db=pubmed&amp;dopt=Abstract&amp;list_uids=27472461">http://www.ncbi.nlm.nih.gov/entrez/query.fcgi?cmd=Retrieve&amp;db=pubmed&amp;dopt=Abstract&amp;list_uids=27472461</a>  6 Oncotarget  Jul 2016 JOURNAL ARTICLE                                               |
| notch1  | myc     | <a href="http://www.ncbi.nlm.nih.gov/entrez/query.fcgi?cmd=Retrieve&amp;db=pubmed&amp;dopt=Abstract&amp;list_uids=27472461">http://www.ncbi.nlm.nih.gov/entrez/query.fcgi?cmd=Retrieve&amp;db=pubmed&amp;dopt=Abstract&amp;list_uids=27472461</a>  6 Oncotarget  Jul 2016 JOURNAL ARTICLE                                               |
| notch1  | dll1    | <a href="http://www.ncbi.nlm.nih.gov/entrez/query.fcgi?cmd=Retrieve&amp;db=pubmed&amp;dopt=Abstract&amp;list_uids=27472461">http://www.ncbi.nlm.nih.gov/entrez/query.fcgi?cmd=Retrieve&amp;db=pubmed&amp;dopt=Abstract&amp;list_uids=27472461</a>  6 Oncotarget  Jul 2016 JOURNAL ARTICLE                                               |
| mirn143 | ctgf    | <a href="http://www.ncbi.nlm.nih.gov/entrez/query.fcgi?cmd=Retrieve&amp;db=pubmed&amp;dopt=Abstract&amp;list_uids=27398154">http://www.ncbi.nlm.nih.gov/entrez/query.fcgi?cmd=Retrieve&amp;db=pubmed&amp;dopt=Abstract&amp;list_uids=27398154</a>  6 Am J Transl Res 8 6  2016 Journal Article                                          |
| mirn221 | nostrin | <a href="http://www.ncbi.nlm.nih.gov/entrez/query.fcgi?cmd=Retrieve&amp;db=pubmed&amp;dopt=Abstract&amp;list_uids=27401251">http://www.ncbi.nlm.nih.gov/entrez/query.fcgi?cmd=Retrieve&amp;db=pubmed&amp;dopt=Abstract&amp;list_uids=27401251</a>  6 Clin Cancer Res  Jul 2016 JOURNAL ARTICLE                                          |
| mirn221 | uts2r   | <a href="http://www.ncbi.nlm.nih.gov/entrez/query.fcgi?cmd=Retrieve&amp;db=pubmed&amp;dopt=Abstract&amp;list_uids=27401251">http://www.ncbi.nlm.nih.gov/entrez/query.fcgi?cmd=Retrieve&amp;db=pubmed&amp;dopt=Abstract&amp;list_uids=27401251</a>  6 Clin Cancer Res  Jul 2016 JOURNAL ARTICLE                                          |
| cyld    | na      | <a href="http://www.ncbi.nlm.nih.gov/entrez/query.fcgi?cmd=Retrieve&amp;db=pubmed&amp;dopt=Abstract&amp;list_uids=27405163">http://www.ncbi.nlm.nih.gov/entrez/query.fcgi?cmd=Retrieve&amp;db=pubmed&amp;dopt=Abstract&amp;list_uids=27405163</a>  6 Yao Xue Xue Bao 51 1 Jan 2016 English Abstract,Journal Article                     |
| ly96    | irf6    | <a href="http://www.ncbi.nlm.nih.gov/entrez/query.fcgi?cmd=Retrieve&amp;db=pubmed&amp;dopt=Abstract&amp;list_uids=27409669">http://www.ncbi.nlm.nih.gov/entrez/query.fcgi?cmd=Retrieve&amp;db=pubmed&amp;dopt=Abstract&amp;list_uids=27409669</a>  6 Oncotarget  Jul 2016 JOURNAL ARTICLE                                               |
| nr0b1   | ly96    | <a href="http://www.ncbi.nlm.nih.gov/entrez/query.fcgi?cmd=Retrieve&amp;db=pubmed&amp;dopt=Abstract&amp;list_uids=27409669">http://www.ncbi.nlm.nih.gov/entrez/query.fcgi?cmd=Retrieve&amp;db=pubmed&amp;dopt=Abstract&amp;list_uids=27409669</a>  6 Oncotarget  Jul 2016 JOURNAL ARTICLE                                               |
| col2a1  | ly96    | <a href="http://www.ncbi.nlm.nih.gov/entrez/query.fcgi?cmd=Retrieve&amp;db=pubmed&amp;dopt=Abstract&amp;list_uids=27409669">http://www.ncbi.nlm.nih.gov/entrez/query.fcgi?cmd=Retrieve&amp;db=pubmed&amp;dopt=Abstract&amp;list_uids=27409669</a>  6 Oncotarget  Jul 2016 JOURNAL ARTICLE                                               |
| col2a1  | nr0b1   | <a href="http://www.ncbi.nlm.nih.gov/entrez/query.fcgi?cmd=Retrieve&amp;db=pubmed&amp;dopt=Abstract&amp;list_uids=27409669">http://www.ncbi.nlm.nih.gov/entrez/query.fcgi?cmd=Retrieve&amp;db=pubmed&amp;dopt=Abstract&amp;list_uids=27409669</a>  6 Oncotarget  Jul 2016 JOURNAL ARTICLE                                               |
| creb1   | cdkn1b  | <a href="http://www.ncbi.nlm.nih.gov/entrez/query.fcgi?cmd=Retrieve&amp;db=pubmed&amp;dopt=Abstract&amp;list_uids=27591936">http://www.ncbi.nlm.nih.gov/entrez/query.fcgi?cmd=Retrieve&amp;db=pubmed&amp;dopt=Abstract&amp;list_uids=27591936</a>  6 Cancer Lett  Aug 2016 JOURNAL ARTICLE                                              |
| creb1   | ifi27   | <a href="http://www.ncbi.nlm.nih.gov/entrez/query.fcgi?cmd=Retrieve&amp;db=pubmed&amp;dopt=Abstract&amp;list_uids=27591936">http://www.ncbi.nlm.nih.gov/entrez/query.fcgi?cmd=Retrieve&amp;db=pubmed&amp;dopt=Abstract&amp;list_uids=27591936</a>  6 Cancer Lett  Aug 2016 JOURNAL ARTICLE                                              |
| taz     | wwtr1   | <a href="http://www.ncbi.nlm.nih.gov/entrez/query.fcgi?cmd=Retrieve&amp;db=pubmed&amp;dopt=Abstract&amp;list_uids=27412635">http://www.ncbi.nlm.nih.gov/entrez/query.fcgi?cmd=Retrieve&amp;db=pubmed&amp;dopt=Abstract&amp;list_uids=27412635</a>  6 Protein Cell 7 8 Aug 2016 Journal Article,Review                                   |
| epha2   | hcc     | <a href="http://www.ncbi.nlm.nih.gov/entrez/query.fcgi?cmd=Retrieve&amp;db=pubmed&amp;dopt=Abstract&amp;list_uids=27412940">http://www.ncbi.nlm.nih.gov/entrez/query.fcgi?cmd=Retrieve&amp;db=pubmed&amp;dopt=Abstract&amp;list_uids=27412940</a>  6 Xi Bao Yu Fen Zi Mian Yi Xue Za Zhi 32 8 Aug 2016 English Abstract,Journal Article |
| mirn141 | hcc     | <a href="http://www.ncbi.nlm.nih.gov/entrez/query.fcgi?cmd=Retrieve&amp;db=pubmed&amp;dopt=Abstract&amp;list_uids=27412940">http://www.ncbi.nlm.nih.gov/entrez/query.fcgi?cmd=Retrieve&amp;db=pubmed&amp;dopt=Abstract&amp;list_uids=27412940</a>  6 Xi Bao Yu Fen Zi Mian Yi Xue Za Zhi 32 8 Aug 2016 English Abstract,Journal Article |
| mirn141 | epha2   | <a href="http://www.ncbi.nlm.nih.gov/entrez/query.fcgi?cmd=Retrieve&amp;db=pubmed&amp;dopt=Abstract&amp;list_uids=27412940">http://www.ncbi.nlm.nih.gov/entrez/query.fcgi?cmd=Retrieve&amp;db=pubmed&amp;dopt=Abstract&amp;list_uids=27412940</a>  6 Xi Bao Yu Fen Zi Mian Yi Xue Za Zhi 32 8 Aug 2016 English Abstract,Journal Article |



|        |           |                                                                                                                                                                                                                                                                                                                        |
|--------|-----------|------------------------------------------------------------------------------------------------------------------------------------------------------------------------------------------------------------------------------------------------------------------------------------------------------------------------|
| fas    | vegfa     | <a href="http://www.ncbi.nlm.nih.gov/entrez/query.fcgi?cmd=Retrieve&amp;db=pubmed&amp;dopt=Abstract&amp;list_uids=27415751">http://www.ncbi.nlm.nih.gov/entrez/query.fcgi?cmd=Retrieve&amp;db=pubmed&amp;dopt=Abstract&amp;list_uids=27415751</a>  6 Cancer Biol Ther  Jul 2016 JOURNAL ARTICLE                        |
| fas    | bcl2      | <a href="http://www.ncbi.nlm.nih.gov/entrez/query.fcgi?cmd=Retrieve&amp;db=pubmed&amp;dopt=Abstract&amp;list_uids=27415751">http://www.ncbi.nlm.nih.gov/entrez/query.fcgi?cmd=Retrieve&amp;db=pubmed&amp;dopt=Abstract&amp;list_uids=27415751</a>  6 Cancer Biol Ther  Jul 2016 JOURNAL ARTICLE                        |
| fas    | bcl2l1    | <a href="http://www.ncbi.nlm.nih.gov/entrez/query.fcgi?cmd=Retrieve&amp;db=pubmed&amp;dopt=Abstract&amp;list_uids=27415751">http://www.ncbi.nlm.nih.gov/entrez/query.fcgi?cmd=Retrieve&amp;db=pubmed&amp;dopt=Abstract&amp;list_uids=27415751</a>  6 Cancer Biol Ther  Jul 2016 JOURNAL ARTICLE                        |
| fas    | myc       | <a href="http://www.ncbi.nlm.nih.gov/entrez/query.fcgi?cmd=Retrieve&amp;db=pubmed&amp;dopt=Abstract&amp;list_uids=27415751">http://www.ncbi.nlm.nih.gov/entrez/query.fcgi?cmd=Retrieve&amp;db=pubmed&amp;dopt=Abstract&amp;list_uids=27415751</a>  6 Cancer Biol Ther  Jul 2016 JOURNAL ARTICLE                        |
| fas    | stat3     | <a href="http://www.ncbi.nlm.nih.gov/entrez/query.fcgi?cmd=Retrieve&amp;db=pubmed&amp;dopt=Abstract&amp;list_uids=27415751">http://www.ncbi.nlm.nih.gov/entrez/query.fcgi?cmd=Retrieve&amp;db=pubmed&amp;dopt=Abstract&amp;list_uids=27415751</a>  6 Cancer Biol Ther  Jul 2016 JOURNAL ARTICLE                        |
| bcl2l1 | vegfa     | <a href="http://www.ncbi.nlm.nih.gov/entrez/query.fcgi?cmd=Retrieve&amp;db=pubmed&amp;dopt=Abstract&amp;list_uids=27415751">http://www.ncbi.nlm.nih.gov/entrez/query.fcgi?cmd=Retrieve&amp;db=pubmed&amp;dopt=Abstract&amp;list_uids=27415751</a>  6 Cancer Biol Ther  Jul 2016 JOURNAL ARTICLE                        |
| bcl2l1 | bax       | <a href="http://www.ncbi.nlm.nih.gov/entrez/query.fcgi?cmd=Retrieve&amp;db=pubmed&amp;dopt=Abstract&amp;list_uids=27421660">http://www.ncbi.nlm.nih.gov/entrez/query.fcgi?cmd=Retrieve&amp;db=pubmed&amp;dopt=Abstract&amp;list_uids=27421660</a>  6 Acta Biochim Biophys Sin (Shanghai) 48 8 Aug 2016 Journal Article |
| prkaa1 | sp1       | <a href="http://www.ncbi.nlm.nih.gov/entrez/query.fcgi?cmd=Retrieve&amp;db=pubmed&amp;dopt=Abstract&amp;list_uids=27416558">http://www.ncbi.nlm.nih.gov/entrez/query.fcgi?cmd=Retrieve&amp;db=pubmed&amp;dopt=Abstract&amp;list_uids=27416558</a>  6 Biomed Pharmacother 83  Jul 2016 JOURNAL ARTICLE                  |
| aprt   | sp1       | <a href="http://www.ncbi.nlm.nih.gov/entrez/query.fcgi?cmd=Retrieve&amp;db=pubmed&amp;dopt=Abstract&amp;list_uids=27416558">http://www.ncbi.nlm.nih.gov/entrez/query.fcgi?cmd=Retrieve&amp;db=pubmed&amp;dopt=Abstract&amp;list_uids=27416558</a>  6 Biomed Pharmacother 83  Jul 2016 JOURNAL ARTICLE                  |
| aprt   | prkaa1    | <a href="http://www.ncbi.nlm.nih.gov/entrez/query.fcgi?cmd=Retrieve&amp;db=pubmed&amp;dopt=Abstract&amp;list_uids=27416558">http://www.ncbi.nlm.nih.gov/entrez/query.fcgi?cmd=Retrieve&amp;db=pubmed&amp;dopt=Abstract&amp;list_uids=27416558</a>  6 Biomed Pharmacother 83  Jul 2016 JOURNAL ARTICLE                  |
| dnmt1  | sp1       | <a href="http://www.ncbi.nlm.nih.gov/entrez/query.fcgi?cmd=Retrieve&amp;db=pubmed&amp;dopt=Abstract&amp;list_uids=27416558">http://www.ncbi.nlm.nih.gov/entrez/query.fcgi?cmd=Retrieve&amp;db=pubmed&amp;dopt=Abstract&amp;list_uids=27416558</a>  6 Biomed Pharmacother 83  Jul 2016 JOURNAL ARTICLE                  |
| dnmt1  | prkaa1    | <a href="http://www.ncbi.nlm.nih.gov/entrez/query.fcgi?cmd=Retrieve&amp;db=pubmed&amp;dopt=Abstract&amp;list_uids=27416558">http://www.ncbi.nlm.nih.gov/entrez/query.fcgi?cmd=Retrieve&amp;db=pubmed&amp;dopt=Abstract&amp;list_uids=27416558</a>  6 Biomed Pharmacother 83  Jul 2016 JOURNAL ARTICLE                  |
| dnmt1  | aprt      | <a href="http://www.ncbi.nlm.nih.gov/entrez/query.fcgi?cmd=Retrieve&amp;db=pubmed&amp;dopt=Abstract&amp;list_uids=27416558">http://www.ncbi.nlm.nih.gov/entrez/query.fcgi?cmd=Retrieve&amp;db=pubmed&amp;dopt=Abstract&amp;list_uids=27416558</a>  6 Biomed Pharmacother 83  Jul 2016 JOURNAL ARTICLE                  |
| dnmt1  | ros1      | <a href="http://www.ncbi.nlm.nih.gov/entrez/query.fcgi?cmd=Retrieve&amp;db=pubmed&amp;dopt=Abstract&amp;list_uids=27416558">http://www.ncbi.nlm.nih.gov/entrez/query.fcgi?cmd=Retrieve&amp;db=pubmed&amp;dopt=Abstract&amp;list_uids=27416558</a>  6 Biomed Pharmacother 83  Jul 2016 JOURNAL ARTICLE                  |
| hdac9  | tmprss11d | <a href="http://www.ncbi.nlm.nih.gov/entrez/query.fcgi?cmd=Retrieve&amp;db=pubmed&amp;dopt=Abstract&amp;list_uids=27429844">http://www.ncbi.nlm.nih.gov/entrez/query.fcgi?cmd=Retrieve&amp;db=pubmed&amp;dopt=Abstract&amp;list_uids=27429844</a>  6 Am J Cancer Res 6 6  2016 Journal Article                         |
| hdac9  | hdac8     | <a href="http://www.ncbi.nlm.nih.gov/entrez/query.fcgi?cmd=Retrieve&amp;db=pubmed&amp;dopt=Abstract&amp;list_uids=27429844">http://www.ncbi.nlm.nih.gov/entrez/query.fcgi?cmd=Retrieve&amp;db=pubmed&amp;dopt=Abstract&amp;list_uids=27429844</a>  6 Am J Cancer Res 6 6  2016 Journal Article                         |
| hdac9  | hdac3     | <a href="http://www.ncbi.nlm.nih.gov/entrez/query.fcgi?cmd=Retrieve&amp;db=pubmed&amp;dopt=Abstract&amp;list_uids=27429844">http://www.ncbi.nlm.nih.gov/entrez/query.fcgi?cmd=Retrieve&amp;db=pubmed&amp;dopt=Abstract&amp;list_uids=27429844</a>  6 Am J Cancer Res 6 6  2016 Journal Article                         |
| hdac9  | hdac2     | <a href="http://www.ncbi.nlm.nih.gov/entrez/query.fcgi?cmd=Retrieve&amp;db=pubmed&amp;dopt=Abstract&amp;list_uids=27429844">http://www.ncbi.nlm.nih.gov/entrez/query.fcgi?cmd=Retrieve&amp;db=pubmed&amp;dopt=Abstract&amp;list_uids=27429844</a>  6 Am J Cancer Res 6 6  2016 Journal Article                         |

|         |         |                                                                                                                                                                                                                                                                                                                        |
|---------|---------|------------------------------------------------------------------------------------------------------------------------------------------------------------------------------------------------------------------------------------------------------------------------------------------------------------------------|
| hdac9   | hdac1   | <a href="http://www.ncbi.nlm.nih.gov/entrez/query.fcgi?cmd=Retrieve&amp;db=pubmed&amp;dopt=Abstract&amp;list_uids=27429844">http://www.ncbi.nlm.nih.gov/entrez/query.fcgi?cmd=Retrieve&amp;db=pubmed&amp;dopt=Abstract&amp;list_uids=27429844</a>  6 Am J Cancer Res 6 6 2016 Journal Article                          |
| hdac9   | prdx2   | <a href="http://www.ncbi.nlm.nih.gov/entrez/query.fcgi?cmd=Retrieve&amp;db=pubmed&amp;dopt=Abstract&amp;list_uids=27507059">http://www.ncbi.nlm.nih.gov/entrez/query.fcgi?cmd=Retrieve&amp;db=pubmed&amp;dopt=Abstract&amp;list_uids=27507059</a>  6 Oncotarget  Aug 2016 JOURNAL ARTICLE                              |
| prex1   | hdac9   | <a href="http://www.ncbi.nlm.nih.gov/entrez/query.fcgi?cmd=Retrieve&amp;db=pubmed&amp;dopt=Abstract&amp;list_uids=27418645">http://www.ncbi.nlm.nih.gov/entrez/query.fcgi?cmd=Retrieve&amp;db=pubmed&amp;dopt=Abstract&amp;list_uids=27418645</a>  6 Mol Cancer Res  Jul 2016 JOURNAL ARTICLE                          |
| prex1   | cdc42   | <a href="http://www.ncbi.nlm.nih.gov/entrez/query.fcgi?cmd=Retrieve&amp;db=pubmed&amp;dopt=Abstract&amp;list_uids=27418645">http://www.ncbi.nlm.nih.gov/entrez/query.fcgi?cmd=Retrieve&amp;db=pubmed&amp;dopt=Abstract&amp;list_uids=27418645</a>  6 Mol Cancer Res  Jul 2016 JOURNAL ARTICLE                          |
| prex1   | rac1    | <a href="http://www.ncbi.nlm.nih.gov/entrez/query.fcgi?cmd=Retrieve&amp;db=pubmed&amp;dopt=Abstract&amp;list_uids=27418645">http://www.ncbi.nlm.nih.gov/entrez/query.fcgi?cmd=Retrieve&amp;db=pubmed&amp;dopt=Abstract&amp;list_uids=27418645</a>  6 Mol Cancer Res  Jul 2016 JOURNAL ARTICLE                          |
| prex1   | ephb2   | <a href="http://www.ncbi.nlm.nih.gov/entrez/query.fcgi?cmd=Retrieve&amp;db=pubmed&amp;dopt=Abstract&amp;list_uids=27418645">http://www.ncbi.nlm.nih.gov/entrez/query.fcgi?cmd=Retrieve&amp;db=pubmed&amp;dopt=Abstract&amp;list_uids=27418645</a>  6 Mol Cancer Res  Jul 2016 JOURNAL ARTICLE                          |
| cic     | tspan8  | <a href="http://www.ncbi.nlm.nih.gov/entrez/query.fcgi?cmd=Retrieve&amp;db=pubmed&amp;dopt=Abstract&amp;list_uids=27419629">http://www.ncbi.nlm.nih.gov/entrez/query.fcgi?cmd=Retrieve&amp;db=pubmed&amp;dopt=Abstract&amp;list_uids=27419629</a>  6 Oncotarget  Jul 2016 JOURNAL ARTICLE                              |
| cic     | cd44    | <a href="http://www.ncbi.nlm.nih.gov/entrez/query.fcgi?cmd=Retrieve&amp;db=pubmed&amp;dopt=Abstract&amp;list_uids=27419629">http://www.ncbi.nlm.nih.gov/entrez/query.fcgi?cmd=Retrieve&amp;db=pubmed&amp;dopt=Abstract&amp;list_uids=27419629</a>  6 Oncotarget  Jul 2016 JOURNAL ARTICLE                              |
| tsc1    | frap1   | <a href="http://www.ncbi.nlm.nih.gov/entrez/query.fcgi?cmd=Retrieve&amp;db=pubmed&amp;dopt=Abstract&amp;list_uids=27421126">http://www.ncbi.nlm.nih.gov/entrez/query.fcgi?cmd=Retrieve&amp;db=pubmed&amp;dopt=Abstract&amp;list_uids=27421126</a>  6 Wiad Lek 69 2 Pt 1 2016 English Abstract,Journal Article          |
| tsc1    | slc12a3 | <a href="http://www.ncbi.nlm.nih.gov/entrez/query.fcgi?cmd=Retrieve&amp;db=pubmed&amp;dopt=Abstract&amp;list_uids=27421126">http://www.ncbi.nlm.nih.gov/entrez/query.fcgi?cmd=Retrieve&amp;db=pubmed&amp;dopt=Abstract&amp;list_uids=27421126</a>  6 Wiad Lek 69 2 Pt 1 2016 English Abstract,Journal Article          |
| slc12a3 | frap1   | <a href="http://www.ncbi.nlm.nih.gov/entrez/query.fcgi?cmd=Retrieve&amp;db=pubmed&amp;dopt=Abstract&amp;list_uids=27421126">http://www.ncbi.nlm.nih.gov/entrez/query.fcgi?cmd=Retrieve&amp;db=pubmed&amp;dopt=Abstract&amp;list_uids=27421126</a>  6 Wiad Lek 69 2 Pt 1 2016 English Abstract,Journal Article          |
| ing4    | bax     | <a href="http://www.ncbi.nlm.nih.gov/entrez/query.fcgi?cmd=Retrieve&amp;db=pubmed&amp;dopt=Abstract&amp;list_uids=27421660">http://www.ncbi.nlm.nih.gov/entrez/query.fcgi?cmd=Retrieve&amp;db=pubmed&amp;dopt=Abstract&amp;list_uids=27421660</a>  6 Acta Biochim Biophys Sin (Shanghai) 48 8 Aug 2016 Journal Article |
| ing4    | bcl2l1  | <a href="http://www.ncbi.nlm.nih.gov/entrez/query.fcgi?cmd=Retrieve&amp;db=pubmed&amp;dopt=Abstract&amp;list_uids=27421660">http://www.ncbi.nlm.nih.gov/entrez/query.fcgi?cmd=Retrieve&amp;db=pubmed&amp;dopt=Abstract&amp;list_uids=27421660</a>  6 Acta Biochim Biophys Sin (Shanghai) 48 8 Aug 2016 Journal Article |
| ing4    | bcl2    | <a href="http://www.ncbi.nlm.nih.gov/entrez/query.fcgi?cmd=Retrieve&amp;db=pubmed&amp;dopt=Abstract&amp;list_uids=27421660">http://www.ncbi.nlm.nih.gov/entrez/query.fcgi?cmd=Retrieve&amp;db=pubmed&amp;dopt=Abstract&amp;list_uids=27421660</a>  6 Acta Biochim Biophys Sin (Shanghai) 48 8 Aug 2016 Journal Article |
| ing4    | cdkn1a  | <a href="http://www.ncbi.nlm.nih.gov/entrez/query.fcgi?cmd=Retrieve&amp;db=pubmed&amp;dopt=Abstract&amp;list_uids=27421660">http://www.ncbi.nlm.nih.gov/entrez/query.fcgi?cmd=Retrieve&amp;db=pubmed&amp;dopt=Abstract&amp;list_uids=27421660</a>  6 Acta Biochim Biophys Sin (Shanghai) 48 8 Aug 2016 Journal Article |
| ing4    | tp53    | <a href="http://www.ncbi.nlm.nih.gov/entrez/query.fcgi?cmd=Retrieve&amp;db=pubmed&amp;dopt=Abstract&amp;list_uids=27421660">http://www.ncbi.nlm.nih.gov/entrez/query.fcgi?cmd=Retrieve&amp;db=pubmed&amp;dopt=Abstract&amp;list_uids=27421660</a>  6 Acta Biochim Biophys Sin (Shanghai) 48 8 Aug 2016 Journal Article |
| ing4    | pten    | <a href="http://www.ncbi.nlm.nih.gov/entrez/query.fcgi?cmd=Retrieve&amp;db=pubmed&amp;dopt=Abstract&amp;list_uids=27421660">http://www.ncbi.nlm.nih.gov/entrez/query.fcgi?cmd=Retrieve&amp;db=pubmed&amp;dopt=Abstract&amp;list_uids=27421660</a>  6 Acta Biochim Biophys Sin (Shanghai) 48 8 Aug 2016 Journal Article |
| il13    | alcam   | <a href="http://www.ncbi.nlm.nih.gov/entrez/query.fcgi?cmd=Retrieve&amp;db=pubmed&amp;dopt=Abstract&amp;list_uids=27533463">http://www.ncbi.nlm.nih.gov/entrez/query.fcgi?cmd=Retrieve&amp;db=pubmed&amp;dopt=Abstract&amp;list_uids=27533463</a>  6 Oncotarget  Aug 2016 JOURNAL ARTICLE                              |

|       |          |                                                                                                                                                                                                                                                                                                               |
|-------|----------|---------------------------------------------------------------------------------------------------------------------------------------------------------------------------------------------------------------------------------------------------------------------------------------------------------------|
| il13  | prom1    | <a href="http://www.ncbi.nlm.nih.gov/entrez/query.fcgi?cmd=Retrieve&amp;db=pubmed&amp;dopt=Abstract&amp;list_uids=27533463">http://www.ncbi.nlm.nih.gov/entrez/query.fcgi?cmd=Retrieve&amp;db=pubmed&amp;dopt=Abstract&amp;list_uids=27533463</a>  6 Oncotarget  Aug 2016 JOURNAL ARTICLE                     |
| il13  | cd44     | <a href="http://www.ncbi.nlm.nih.gov/entrez/query.fcgi?cmd=Retrieve&amp;db=pubmed&amp;dopt=Abstract&amp;list_uids=27533463">http://www.ncbi.nlm.nih.gov/entrez/query.fcgi?cmd=Retrieve&amp;db=pubmed&amp;dopt=Abstract&amp;list_uids=27533463</a>  6 Oncotarget  Aug 2016 JOURNAL ARTICLE                     |
| il13  | nanog    | <a href="http://www.ncbi.nlm.nih.gov/entrez/query.fcgi?cmd=Retrieve&amp;db=pubmed&amp;dopt=Abstract&amp;list_uids=27533463">http://www.ncbi.nlm.nih.gov/entrez/query.fcgi?cmd=Retrieve&amp;db=pubmed&amp;dopt=Abstract&amp;list_uids=27533463</a>  6 Oncotarget  Aug 2016 JOURNAL ARTICLE                     |
| il13  | zeb1     | <a href="http://www.ncbi.nlm.nih.gov/entrez/query.fcgi?cmd=Retrieve&amp;db=pubmed&amp;dopt=Abstract&amp;list_uids=27533463">http://www.ncbi.nlm.nih.gov/entrez/query.fcgi?cmd=Retrieve&amp;db=pubmed&amp;dopt=Abstract&amp;list_uids=27533463</a>  6 Oncotarget  Aug 2016 JOURNAL ARTICLE                     |
| il13  | itk      | <a href="http://www.ncbi.nlm.nih.gov/entrez/query.fcgi?cmd=Retrieve&amp;db=pubmed&amp;dopt=Abstract&amp;list_uids=27533463">http://www.ncbi.nlm.nih.gov/entrez/query.fcgi?cmd=Retrieve&amp;db=pubmed&amp;dopt=Abstract&amp;list_uids=27533463</a>  6 Oncotarget  Aug 2016 JOURNAL ARTICLE                     |
| il13  | phgdh    | <a href="http://www.ncbi.nlm.nih.gov/entrez/query.fcgi?cmd=Retrieve&amp;db=pubmed&amp;dopt=Abstract&amp;list_uids=27593106">http://www.ncbi.nlm.nih.gov/entrez/query.fcgi?cmd=Retrieve&amp;db=pubmed&amp;dopt=Abstract&amp;list_uids=27593106</a>  6 J Hepatol  Sep 2016 JOURNAL ARTICLE                      |
| il13  | fbn2     | <a href="http://www.ncbi.nlm.nih.gov/entrez/query.fcgi?cmd=Retrieve&amp;db=pubmed&amp;dopt=Abstract&amp;list_uids=27593106">http://www.ncbi.nlm.nih.gov/entrez/query.fcgi?cmd=Retrieve&amp;db=pubmed&amp;dopt=Abstract&amp;list_uids=27593106</a>  6 J Hepatol  Sep 2016 JOURNAL ARTICLE                      |
| il13  | il34     | <a href="http://www.ncbi.nlm.nih.gov/entrez/query.fcgi?cmd=Retrieve&amp;db=pubmed&amp;dopt=Abstract&amp;list_uids=27593106">http://www.ncbi.nlm.nih.gov/entrez/query.fcgi?cmd=Retrieve&amp;db=pubmed&amp;dopt=Abstract&amp;list_uids=27593106</a>  6 J Hepatol  Sep 2016 JOURNAL ARTICLE                      |
| zfp36 | il13     | <a href="http://www.ncbi.nlm.nih.gov/entrez/query.fcgi?cmd=Retrieve&amp;db=pubmed&amp;dopt=Abstract&amp;list_uids=27424080">http://www.ncbi.nlm.nih.gov/entrez/query.fcgi?cmd=Retrieve&amp;db=pubmed&amp;dopt=Abstract&amp;list_uids=27424080</a>  6 Int Immunopharmacol 39  Oct 2016 Journal Article         |
| zfp36 | frap1    | <a href="http://www.ncbi.nlm.nih.gov/entrez/query.fcgi?cmd=Retrieve&amp;db=pubmed&amp;dopt=Abstract&amp;list_uids=27424080">http://www.ncbi.nlm.nih.gov/entrez/query.fcgi?cmd=Retrieve&amp;db=pubmed&amp;dopt=Abstract&amp;list_uids=27424080</a>  6 Int Immunopharmacol 39  Oct 2016 Journal Article         |
| zfp36 | akt1     | <a href="http://www.ncbi.nlm.nih.gov/entrez/query.fcgi?cmd=Retrieve&amp;db=pubmed&amp;dopt=Abstract&amp;list_uids=27424080">http://www.ncbi.nlm.nih.gov/entrez/query.fcgi?cmd=Retrieve&amp;db=pubmed&amp;dopt=Abstract&amp;list_uids=27424080</a>  6 Int Immunopharmacol 39  Oct 2016 Journal Article         |
| zfp36 | pik3ca   | <a href="http://www.ncbi.nlm.nih.gov/entrez/query.fcgi?cmd=Retrieve&amp;db=pubmed&amp;dopt=Abstract&amp;list_uids=27424080">http://www.ncbi.nlm.nih.gov/entrez/query.fcgi?cmd=Retrieve&amp;db=pubmed&amp;dopt=Abstract&amp;list_uids=27424080</a>  6 Int Immunopharmacol 39  Oct 2016 Journal Article         |
| uca1  | bcatenin | <a href="http://www.ncbi.nlm.nih.gov/entrez/query.fcgi?cmd=Retrieve&amp;db=pubmed&amp;dopt=Abstract&amp;list_uids=27424981">http://www.ncbi.nlm.nih.gov/entrez/query.fcgi?cmd=Retrieve&amp;db=pubmed&amp;dopt=Abstract&amp;list_uids=27424981</a>  6 Eur Rev Med Pharmacol Sci 20 13 Jul 2016 Journal Article |
| uca1  | itk      | <a href="http://www.ncbi.nlm.nih.gov/entrez/query.fcgi?cmd=Retrieve&amp;db=pubmed&amp;dopt=Abstract&amp;list_uids=27424981">http://www.ncbi.nlm.nih.gov/entrez/query.fcgi?cmd=Retrieve&amp;db=pubmed&amp;dopt=Abstract&amp;list_uids=27424981</a>  6 Eur Rev Med Pharmacol Sci 20 13 Jul 2016 Journal Article |
| uca1  | cdkn1b   | <a href="http://www.ncbi.nlm.nih.gov/entrez/query.fcgi?cmd=Retrieve&amp;db=pubmed&amp;dopt=Abstract&amp;list_uids=27591936">http://www.ncbi.nlm.nih.gov/entrez/query.fcgi?cmd=Retrieve&amp;db=pubmed&amp;dopt=Abstract&amp;list_uids=27591936</a>  6 Cancer Lett  Aug 2016 JOURNAL ARTICLE                    |
| uca1  | ifi27    | <a href="http://www.ncbi.nlm.nih.gov/entrez/query.fcgi?cmd=Retrieve&amp;db=pubmed&amp;dopt=Abstract&amp;list_uids=27591936">http://www.ncbi.nlm.nih.gov/entrez/query.fcgi?cmd=Retrieve&amp;db=pubmed&amp;dopt=Abstract&amp;list_uids=27591936</a>  6 Cancer Lett  Aug 2016 JOURNAL ARTICLE                    |
| uca1  | creb1    | <a href="http://www.ncbi.nlm.nih.gov/entrez/query.fcgi?cmd=Retrieve&amp;db=pubmed&amp;dopt=Abstract&amp;list_uids=27591936">http://www.ncbi.nlm.nih.gov/entrez/query.fcgi?cmd=Retrieve&amp;db=pubmed&amp;dopt=Abstract&amp;list_uids=27591936</a>  6 Cancer Lett  Aug 2016 JOURNAL ARTICLE                    |
| hmgb1 | il10     | <a href="http://www.ncbi.nlm.nih.gov/entrez/query.fcgi?cmd=Retrieve&amp;db=pubmed&amp;dopt=Abstract&amp;list_uids=27426915">http://www.ncbi.nlm.nih.gov/entrez/query.fcgi?cmd=Retrieve&amp;db=pubmed&amp;dopt=Abstract&amp;list_uids=27426915</a>  6 Sci Rep 6  2016 Journal Article                          |

|         |               |                                                                                                                                                                                                                                                                                                                                                                                                                                                                                                                                                                                               |
|---------|---------------|-----------------------------------------------------------------------------------------------------------------------------------------------------------------------------------------------------------------------------------------------------------------------------------------------------------------------------------------------------------------------------------------------------------------------------------------------------------------------------------------------------------------------------------------------------------------------------------------------|
| hdac8   | tmprss<br>11d | <a href="http://www.ncbi.nlm.nih.gov/entrez/query.fcgi?cmd=Retrieve&amp;db=pubmed&amp;dopt=Abstract&amp;list_uids=27429844">http://www.ncbi.nlm.nih.gov/entrez/query.fcgi?cmd=Retrieve&amp;db=pubmed&amp;dopt=Abstract&amp;list_uids=27429844</a>  6 Am J Cancer Res 6 6 2016 Journal Article                                                                                                                                                                                                                                                                                                 |
| hdac3   | tmprss<br>11d | <a href="http://www.ncbi.nlm.nih.gov/entrez/query.fcgi?cmd=Retrieve&amp;db=pubmed&amp;dopt=Abstract&amp;list_uids=27429844">http://www.ncbi.nlm.nih.gov/entrez/query.fcgi?cmd=Retrieve&amp;db=pubmed&amp;dopt=Abstract&amp;list_uids=27429844</a>  6 Am J Cancer Res 6 6 2016 Journal Article                                                                                                                                                                                                                                                                                                 |
| hdac3   | hdac8         | <a href="http://www.ncbi.nlm.nih.gov/entrez/query.fcgi?cmd=Retrieve&amp;db=pubmed&amp;dopt=Abstract&amp;list_uids=27429844">http://www.ncbi.nlm.nih.gov/entrez/query.fcgi?cmd=Retrieve&amp;db=pubmed&amp;dopt=Abstract&amp;list_uids=27429844</a>  6 Am J Cancer Res 6 6 2016 Journal Article                                                                                                                                                                                                                                                                                                 |
| hdac2   | tmprss<br>11d | <a href="http://www.ncbi.nlm.nih.gov/entrez/query.fcgi?cmd=Retrieve&amp;db=pubmed&amp;dopt=Abstract&amp;list_uids=27429844">http://www.ncbi.nlm.nih.gov/entrez/query.fcgi?cmd=Retrieve&amp;db=pubmed&amp;dopt=Abstract&amp;list_uids=27429844</a>  6 Am J Cancer Res 6 6 2016 Journal Article                                                                                                                                                                                                                                                                                                 |
| hdac2   | hdac8         | <a href="http://www.ncbi.nlm.nih.gov/entrez/query.fcgi?cmd=Retrieve&amp;db=pubmed&amp;dopt=Abstract&amp;list_uids=27429844">http://www.ncbi.nlm.nih.gov/entrez/query.fcgi?cmd=Retrieve&amp;db=pubmed&amp;dopt=Abstract&amp;list_uids=27429844</a>  6 Am J Cancer Res 6 6 2016 Journal Article                                                                                                                                                                                                                                                                                                 |
| hdac2   | hdac3         | <a href="http://www.ncbi.nlm.nih.gov/entrez/query.fcgi?cmd=Retrieve&amp;db=pubmed&amp;dopt=Abstract&amp;list_uids=27429844">http://www.ncbi.nlm.nih.gov/entrez/query.fcgi?cmd=Retrieve&amp;db=pubmed&amp;dopt=Abstract&amp;list_uids=27429844</a>  6 Am J Cancer Res 6 6 2016 Journal Article                                                                                                                                                                                                                                                                                                 |
| mirn223 | itk           | <a href="http://www.ncbi.nlm.nih.gov/entrez/query.fcgi?cmd=Retrieve&amp;db=pubmed&amp;dopt=Abstract&amp;list_uids=27429851">http://www.ncbi.nlm.nih.gov/entrez/query.fcgi?cmd=Retrieve&amp;db=pubmed&amp;dopt=Abstract&amp;list_uids=27429851</a>  6 Am J Cancer Res 6 6 2016 Journal Article                                                                                                                                                                                                                                                                                                 |
| chrna4  | akt1          | <a href="http://www.ncbi.nlm.nih.gov/entrez/query.fcgi?cmd=Retrieve&amp;db=pubmed&amp;dopt=Abstract&amp;list_uids=27424921">http://www.ncbi.nlm.nih.gov/entrez/query.fcgi?cmd=Retrieve&amp;db=pubmed&amp;dopt=Abstract&amp;list_uids=27424921</a>  6 Biochim Biophys Acta 1860 11 Pt A Nov 2016 Journal Article                                                                                                                                                                                                                                                                               |
| eif2ak3 | rela          | <a href="http://www.ncbi.nlm.nih.gov/entrez/query.fcgi?cmd=Retrieve&amp;db=pubmed&amp;dopt=Abstract&amp;list_uids=27533779">http://www.ncbi.nlm.nih.gov/entrez/query.fcgi?cmd=Retrieve&amp;db=pubmed&amp;dopt=Abstract&amp;list_uids=27533779</a>  6 Mol Carcinog   Aug 2016 JOURNAL ARTICLE                                                                                                                                                                                                                                                                                                  |
| eif2ak3 | ephb2         | <a href="http://www.ncbi.nlm.nih.gov/entrez/query.fcgi?cmd=Retrieve&amp;db=pubmed&amp;dopt=Abstract&amp;list_uids=27533779">http://www.ncbi.nlm.nih.gov/entrez/query.fcgi?cmd=Retrieve&amp;db=pubmed&amp;dopt=Abstract&amp;list_uids=27533779</a>  6 Mol Carcinog   Aug 2016 JOURNAL ARTICLE  <a href="http://www.ncbi.nlm.nih.gov/entrez/query.fcgi?cmd=Retrieve&amp;db=pubmed&amp;dopt=Abstract&amp;list_uids=27572503">http://www.ncbi.nlm.nih.gov/entrez/query.fcgi?cmd=Retrieve&amp;db=pubmed&amp;dopt=Abstract&amp;list_uids=27572503</a>  6 Oncol Rep   Aug 2016 JOURNAL ARTICLE       |
| eif2ak3 | na            | <a href="http://www.ncbi.nlm.nih.gov/entrez/query.fcgi?cmd=Retrieve&amp;db=pubmed&amp;dopt=Abstract&amp;list_uids=27572503">http://www.ncbi.nlm.nih.gov/entrez/query.fcgi?cmd=Retrieve&amp;db=pubmed&amp;dopt=Abstract&amp;list_uids=27572503</a>  6 Oncol Rep   Aug 2016 JOURNAL ARTICLE                                                                                                                                                                                                                                                                                                     |
| fgfr2   | eif2ak3       | <a href="http://www.ncbi.nlm.nih.gov/entrez/query.fcgi?cmd=Retrieve&amp;db=pubmed&amp;dopt=Abstract&amp;list_uids=27430377">http://www.ncbi.nlm.nih.gov/entrez/query.fcgi?cmd=Retrieve&amp;db=pubmed&amp;dopt=Abstract&amp;list_uids=27430377</a>  6 Oncol Rep 36 3 Sep 2016 Journal Article                                                                                                                                                                                                                                                                                                  |
| nudt6   | eif2ak3       | <a href="http://www.ncbi.nlm.nih.gov/entrez/query.fcgi?cmd=Retrieve&amp;db=pubmed&amp;dopt=Abstract&amp;list_uids=27430377">http://www.ncbi.nlm.nih.gov/entrez/query.fcgi?cmd=Retrieve&amp;db=pubmed&amp;dopt=Abstract&amp;list_uids=27430377</a>  6 Oncol Rep 36 3 Sep 2016 Journal Article                                                                                                                                                                                                                                                                                                  |
| nudt6   | fgfr2         | <a href="http://www.ncbi.nlm.nih.gov/entrez/query.fcgi?cmd=Retrieve&amp;db=pubmed&amp;dopt=Abstract&amp;list_uids=27430377">http://www.ncbi.nlm.nih.gov/entrez/query.fcgi?cmd=Retrieve&amp;db=pubmed&amp;dopt=Abstract&amp;list_uids=27430377</a>  6 Oncol Rep 36 3 Sep 2016 Journal Article                                                                                                                                                                                                                                                                                                  |
| sfn     | pcsk1         | <a href="http://www.ncbi.nlm.nih.gov/entrez/query.fcgi?cmd=Retrieve&amp;db=pubmed&amp;dopt=Abstract&amp;list_uids=27430422">http://www.ncbi.nlm.nih.gov/entrez/query.fcgi?cmd=Retrieve&amp;db=pubmed&amp;dopt=Abstract&amp;list_uids=27430422</a>  6 Oncol Rep 36 3 Sep 2016 Journal Article                                                                                                                                                                                                                                                                                                  |
| macc1   | itk           | <a href="http://www.ncbi.nlm.nih.gov/entrez/query.fcgi?cmd=Retrieve&amp;db=pubmed&amp;dopt=Abstract&amp;list_uids=27492459">http://www.ncbi.nlm.nih.gov/entrez/query.fcgi?cmd=Retrieve&amp;db=pubmed&amp;dopt=Abstract&amp;list_uids=27492459</a>  6 Tumour Biol   Aug 2016 JOURNAL ARTICLE  <a href="http://www.ncbi.nlm.nih.gov/entrez/query.fcgi?cmd=Retrieve&amp;db=pubmed&amp;dopt=Abstract&amp;list_uids=27488539">http://www.ncbi.nlm.nih.gov/entrez/query.fcgi?cmd=Retrieve&amp;db=pubmed&amp;dopt=Abstract&amp;list_uids=27488539</a>  6 Biosci Trends 10 4 Sep 2016 Journal Article |

|         |         |                                                                                                                                                                                                                                                                                                                 |
|---------|---------|-----------------------------------------------------------------------------------------------------------------------------------------------------------------------------------------------------------------------------------------------------------------------------------------------------------------|
| maccl   | cyr61   | <a href="http://www.ncbi.nlm.nih.gov/entrez/query.fcgi?cmd=Retrieve&amp;db=pubmed&amp;dopt=Abstract&amp;list_uids=27492459">http://www.ncbi.nlm.nih.gov/entrez/query.fcgi?cmd=Retrieve&amp;db=pubmed&amp;dopt=Abstract&amp;list_uids=27492459</a>  6 Tumour Biol   Aug 2016 JOURNAL ARTICLE                     |
| maccl   | tnfsf13 | <a href="http://www.ncbi.nlm.nih.gov/entrez/query.fcgi?cmd=Retrieve&amp;db=pubmed&amp;dopt=Abstract&amp;list_uids=27529686">http://www.ncbi.nlm.nih.gov/entrez/query.fcgi?cmd=Retrieve&amp;db=pubmed&amp;dopt=Abstract&amp;list_uids=27529686</a>  6 Int J Cancer   Aug 2016 JOURNAL ARTICLE                    |
| maccl   | hgf     | <a href="http://www.ncbi.nlm.nih.gov/entrez/query.fcgi?cmd=Retrieve&amp;db=pubmed&amp;dopt=Abstract&amp;list_uids=27529686">http://www.ncbi.nlm.nih.gov/entrez/query.fcgi?cmd=Retrieve&amp;db=pubmed&amp;dopt=Abstract&amp;list_uids=27529686</a>  6 Int J Cancer   Aug 2016 JOURNAL ARTICLE                    |
| maccl   | jun     | <a href="http://www.ncbi.nlm.nih.gov/entrez/query.fcgi?cmd=Retrieve&amp;db=pubmed&amp;dopt=Abstract&amp;list_uids=27529686">http://www.ncbi.nlm.nih.gov/entrez/query.fcgi?cmd=Retrieve&amp;db=pubmed&amp;dopt=Abstract&amp;list_uids=27529686</a>  6 Int J Cancer   Aug 2016 JOURNAL ARTICLE                    |
| maccl   | slc9a1  | <a href="http://www.ncbi.nlm.nih.gov/entrez/query.fcgi?cmd=Retrieve&amp;db=pubmed&amp;dopt=Abstract&amp;list_uids=27529686">http://www.ncbi.nlm.nih.gov/entrez/query.fcgi?cmd=Retrieve&amp;db=pubmed&amp;dopt=Abstract&amp;list_uids=27529686</a>  6 Int J Cancer   Aug 2016 JOURNAL ARTICLE                    |
| ang     | ace     | <a href="http://www.ncbi.nlm.nih.gov/entrez/query.fcgi?cmd=Retrieve&amp;db=pubmed&amp;dopt=Abstract&amp;list_uids=27431603">http://www.ncbi.nlm.nih.gov/entrez/query.fcgi?cmd=Retrieve&amp;db=pubmed&amp;dopt=Abstract&amp;list_uids=27431603</a>  6 Biochim Biophys Acta 1860 11 Pt A Nov 2016 Journal Article |
| ang     | mas1    | <a href="http://www.ncbi.nlm.nih.gov/entrez/query.fcgi?cmd=Retrieve&amp;db=pubmed&amp;dopt=Abstract&amp;list_uids=27431603">http://www.ncbi.nlm.nih.gov/entrez/query.fcgi?cmd=Retrieve&amp;db=pubmed&amp;dopt=Abstract&amp;list_uids=27431603</a>  6 Biochim Biophys Acta 1860 11 Pt A Nov 2016 Journal Article |
| myh14   | mlc1    | <a href="http://www.ncbi.nlm.nih.gov/entrez/query.fcgi?cmd=Retrieve&amp;db=pubmed&amp;dopt=Abstract&amp;list_uids=27432222">http://www.ncbi.nlm.nih.gov/entrez/query.fcgi?cmd=Retrieve&amp;db=pubmed&amp;dopt=Abstract&amp;list_uids=27432222</a>  6 Mol Med Rep 14 3 Sep 2016 Journal Article                  |
| gfap    | pax3    | <a href="http://www.ncbi.nlm.nih.gov/entrez/query.fcgi?cmd=Retrieve&amp;db=pubmed&amp;dopt=Abstract&amp;list_uids=27432276">http://www.ncbi.nlm.nih.gov/entrez/query.fcgi?cmd=Retrieve&amp;db=pubmed&amp;dopt=Abstract&amp;list_uids=27432276</a>  6 Oncol Rep 36 3 Sep 2016 Journal Article                    |
| pcna    | mmp9    | <a href="http://www.ncbi.nlm.nih.gov/entrez/query.fcgi?cmd=Retrieve&amp;db=pubmed&amp;dopt=Abstract&amp;list_uids=27470348">http://www.ncbi.nlm.nih.gov/entrez/query.fcgi?cmd=Retrieve&amp;db=pubmed&amp;dopt=Abstract&amp;list_uids=27470348</a>  6 Biomed Pharmacother 82   Aug 2016 Journal Article          |
| pcna    | mmp2    | <a href="http://www.ncbi.nlm.nih.gov/entrez/query.fcgi?cmd=Retrieve&amp;db=pubmed&amp;dopt=Abstract&amp;list_uids=27470348">http://www.ncbi.nlm.nih.gov/entrez/query.fcgi?cmd=Retrieve&amp;db=pubmed&amp;dopt=Abstract&amp;list_uids=27470348</a>  6 Biomed Pharmacother 82   Aug 2016 Journal Article          |
| pcna    | cdk2    | <a href="http://www.ncbi.nlm.nih.gov/entrez/query.fcgi?cmd=Retrieve&amp;db=pubmed&amp;dopt=Abstract&amp;list_uids=27582508">http://www.ncbi.nlm.nih.gov/entrez/query.fcgi?cmd=Retrieve&amp;db=pubmed&amp;dopt=Abstract&amp;list_uids=27582508</a>  6 Biosci Rep   Aug 2016 JOURNAL ARTICLE                      |
| cap1    | pcna    | <a href="http://www.ncbi.nlm.nih.gov/entrez/query.fcgi?cmd=Retrieve&amp;db=pubmed&amp;dopt=Abstract&amp;list_uids=27432289">http://www.ncbi.nlm.nih.gov/entrez/query.fcgi?cmd=Retrieve&amp;db=pubmed&amp;dopt=Abstract&amp;list_uids=27432289</a>  6 Oncol Rep 36 3 Sep 2016 Journal Article                    |
| mirn206 | twf1    | <a href="http://www.ncbi.nlm.nih.gov/entrez/query.fcgi?cmd=Retrieve&amp;db=pubmed&amp;dopt=Abstract&amp;list_uids=27435395">http://www.ncbi.nlm.nih.gov/entrez/query.fcgi?cmd=Retrieve&amp;db=pubmed&amp;dopt=Abstract&amp;list_uids=27435395</a>  6 Clin Cancer Res   Jul 2016 JOURNAL ARTICLE                 |
| il11    | twf1    | <a href="http://www.ncbi.nlm.nih.gov/entrez/query.fcgi?cmd=Retrieve&amp;db=pubmed&amp;dopt=Abstract&amp;list_uids=27435395">http://www.ncbi.nlm.nih.gov/entrez/query.fcgi?cmd=Retrieve&amp;db=pubmed&amp;dopt=Abstract&amp;list_uids=27435395</a>  6 Clin Cancer Res   Jul 2016 JOURNAL ARTICLE                 |
| il11    | mirn206 | <a href="http://www.ncbi.nlm.nih.gov/entrez/query.fcgi?cmd=Retrieve&amp;db=pubmed&amp;dopt=Abstract&amp;list_uids=27435395">http://www.ncbi.nlm.nih.gov/entrez/query.fcgi?cmd=Retrieve&amp;db=pubmed&amp;dopt=Abstract&amp;list_uids=27435395</a>  6 Clin Cancer Res   Jul 2016 JOURNAL ARTICLE                 |
| srf     | twf1    | <a href="http://www.ncbi.nlm.nih.gov/entrez/query.fcgi?cmd=Retrieve&amp;db=pubmed&amp;dopt=Abstract&amp;list_uids=27435395">http://www.ncbi.nlm.nih.gov/entrez/query.fcgi?cmd=Retrieve&amp;db=pubmed&amp;dopt=Abstract&amp;list_uids=27435395</a>  6 Clin Cancer Res   Jul 2016 JOURNAL ARTICLE                 |
| srf     | mirn206 | <a href="http://www.ncbi.nlm.nih.gov/entrez/query.fcgi?cmd=Retrieve&amp;db=pubmed&amp;dopt=Abstract&amp;list_uids=27435395">http://www.ncbi.nlm.nih.gov/entrez/query.fcgi?cmd=Retrieve&amp;db=pubmed&amp;dopt=Abstract&amp;list_uids=27435395</a>  6 Clin Cancer Res   Jul 2016 JOURNAL ARTICLE                 |

|          |          |                                                                                                                                                                                                                                                                                                 |
|----------|----------|-------------------------------------------------------------------------------------------------------------------------------------------------------------------------------------------------------------------------------------------------------------------------------------------------|
| srf      | il11     | <a href="http://www.ncbi.nlm.nih.gov/entrez/query.fcgi?cmd=Retrieve&amp;db=pubmed&amp;dopt=Abstract&amp;list_uids=27435395">http://www.ncbi.nlm.nih.gov/entrez/query.fcgi?cmd=Retrieve&amp;db=pubmed&amp;dopt=Abstract&amp;list_uids=27435395</a>  6 Clin Cancer Res  Jul 2016 JOURNAL ARTICLE  |
| mk11     | twf1     | <a href="http://www.ncbi.nlm.nih.gov/entrez/query.fcgi?cmd=Retrieve&amp;db=pubmed&amp;dopt=Abstract&amp;list_uids=27435395">http://www.ncbi.nlm.nih.gov/entrez/query.fcgi?cmd=Retrieve&amp;db=pubmed&amp;dopt=Abstract&amp;list_uids=27435395</a>  6 Clin Cancer Res  Jul 2016 JOURNAL ARTICLE  |
| mk11     | mirn206  | <a href="http://www.ncbi.nlm.nih.gov/entrez/query.fcgi?cmd=Retrieve&amp;db=pubmed&amp;dopt=Abstract&amp;list_uids=27435395">http://www.ncbi.nlm.nih.gov/entrez/query.fcgi?cmd=Retrieve&amp;db=pubmed&amp;dopt=Abstract&amp;list_uids=27435395</a>  6 Clin Cancer Res  Jul 2016 JOURNAL ARTICLE  |
| mk11     | srf      | <a href="http://www.ncbi.nlm.nih.gov/entrez/query.fcgi?cmd=Retrieve&amp;db=pubmed&amp;dopt=Abstract&amp;list_uids=27435395">http://www.ncbi.nlm.nih.gov/entrez/query.fcgi?cmd=Retrieve&amp;db=pubmed&amp;dopt=Abstract&amp;list_uids=27435395</a>  6 Clin Cancer Res  Jul 2016 JOURNAL ARTICLE  |
| mk11     | il11     | <a href="http://www.ncbi.nlm.nih.gov/entrez/query.fcgi?cmd=Retrieve&amp;db=pubmed&amp;dopt=Abstract&amp;list_uids=27435395">http://www.ncbi.nlm.nih.gov/entrez/query.fcgi?cmd=Retrieve&amp;db=pubmed&amp;dopt=Abstract&amp;list_uids=27435395</a>  6 Clin Cancer Res  Jul 2016 JOURNAL ARTICLE  |
| akr1b1   | tam      | <a href="http://www.ncbi.nlm.nih.gov/entrez/query.fcgi?cmd=Retrieve&amp;db=pubmed&amp;dopt=Abstract&amp;list_uids=27436059">http://www.ncbi.nlm.nih.gov/entrez/query.fcgi?cmd=Retrieve&amp;db=pubmed&amp;dopt=Abstract&amp;list_uids=27436059</a>  6 Cell Biol Int  Jul 2016 JOURNAL ARTICLE    |
| rps19    | nmt1     | <a href="http://www.ncbi.nlm.nih.gov/entrez/query.fcgi?cmd=Retrieve&amp;db=pubmed&amp;dopt=Abstract&amp;list_uids=27438140">http://www.ncbi.nlm.nih.gov/entrez/query.fcgi?cmd=Retrieve&amp;db=pubmed&amp;dopt=Abstract&amp;list_uids=27438140</a>  6 Oncotarget  Jul 2016 JOURNAL ARTICLE       |
| bpp      | mtm1     | <a href="http://www.ncbi.nlm.nih.gov/entrez/query.fcgi?cmd=Retrieve&amp;db=pubmed&amp;dopt=Abstract&amp;list_uids=27442266">http://www.ncbi.nlm.nih.gov/entrez/query.fcgi?cmd=Retrieve&amp;db=pubmed&amp;dopt=Abstract&amp;list_uids=27442266</a>  6 PLoS One 11 7  2016 Journal Article        |
| serpinb3 | camp     | <a href="http://www.ncbi.nlm.nih.gov/entrez/query.fcgi?cmd=Retrieve&amp;db=pubmed&amp;dopt=Abstract&amp;list_uids=27588122">http://www.ncbi.nlm.nih.gov/entrez/query.fcgi?cmd=Retrieve&amp;db=pubmed&amp;dopt=Abstract&amp;list_uids=27588122</a>  6 Oncol Lett 12 3 Sep 2016 JOURNAL ARTICLE   |
| lct      | serpinb3 | <a href="http://www.ncbi.nlm.nih.gov/entrez/query.fcgi?cmd=Retrieve&amp;db=pubmed&amp;dopt=Abstract&amp;list_uids=27446348">http://www.ncbi.nlm.nih.gov/entrez/query.fcgi?cmd=Retrieve&amp;db=pubmed&amp;dopt=Abstract&amp;list_uids=27446348</a>  6 Exp Ther Med 12 2 Aug 2016 JOURNAL ARTICLE |
| mtss1    | serpinb3 | <a href="http://www.ncbi.nlm.nih.gov/entrez/query.fcgi?cmd=Retrieve&amp;db=pubmed&amp;dopt=Abstract&amp;list_uids=27446348">http://www.ncbi.nlm.nih.gov/entrez/query.fcgi?cmd=Retrieve&amp;db=pubmed&amp;dopt=Abstract&amp;list_uids=27446348</a>  6 Exp Ther Med 12 2 Aug 2016 JOURNAL ARTICLE |
| mtss1    | lct      | <a href="http://www.ncbi.nlm.nih.gov/entrez/query.fcgi?cmd=Retrieve&amp;db=pubmed&amp;dopt=Abstract&amp;list_uids=27446348">http://www.ncbi.nlm.nih.gov/entrez/query.fcgi?cmd=Retrieve&amp;db=pubmed&amp;dopt=Abstract&amp;list_uids=27446348</a>  6 Exp Ther Med 12 2 Aug 2016 JOURNAL ARTICLE |
| mtss1    | ptk2     | <a href="http://www.ncbi.nlm.nih.gov/entrez/query.fcgi?cmd=Retrieve&amp;db=pubmed&amp;dopt=Abstract&amp;list_uids=27446348">http://www.ncbi.nlm.nih.gov/entrez/query.fcgi?cmd=Retrieve&amp;db=pubmed&amp;dopt=Abstract&amp;list_uids=27446348</a>  6 Exp Ther Med 12 2 Aug 2016 JOURNAL ARTICLE |
| map3k5   | mapk14   | <a href="http://www.ncbi.nlm.nih.gov/entrez/query.fcgi?cmd=Retrieve&amp;db=pubmed&amp;dopt=Abstract&amp;list_uids=27446390">http://www.ncbi.nlm.nih.gov/entrez/query.fcgi?cmd=Retrieve&amp;db=pubmed&amp;dopt=Abstract&amp;list_uids=27446390</a>  6 Oncol Lett 12 2 Aug 2016 JOURNAL ARTICLE   |
| myd88    | mapk14   | <a href="http://www.ncbi.nlm.nih.gov/entrez/query.fcgi?cmd=Retrieve&amp;db=pubmed&amp;dopt=Abstract&amp;list_uids=27446390">http://www.ncbi.nlm.nih.gov/entrez/query.fcgi?cmd=Retrieve&amp;db=pubmed&amp;dopt=Abstract&amp;list_uids=27446390</a>  6 Oncol Lett 12 2 Aug 2016 JOURNAL ARTICLE   |
| myd88    | map3k5   | <a href="http://www.ncbi.nlm.nih.gov/entrez/query.fcgi?cmd=Retrieve&amp;db=pubmed&amp;dopt=Abstract&amp;list_uids=27446390">http://www.ncbi.nlm.nih.gov/entrez/query.fcgi?cmd=Retrieve&amp;db=pubmed&amp;dopt=Abstract&amp;list_uids=27446390</a>  6 Oncol Lett 12 2 Aug 2016 JOURNAL ARTICLE   |
| prex2    | pten     | <a href="http://www.ncbi.nlm.nih.gov/entrez/query.fcgi?cmd=Retrieve&amp;db=pubmed&amp;dopt=Abstract&amp;list_uids=27446408">http://www.ncbi.nlm.nih.gov/entrez/query.fcgi?cmd=Retrieve&amp;db=pubmed&amp;dopt=Abstract&amp;list_uids=27446408</a>  6 Oncol Lett 12 2 Aug 2016 JOURNAL ARTICLE   |
| prex2    | pik3ca   | <a href="http://www.ncbi.nlm.nih.gov/entrez/query.fcgi?cmd=Retrieve&amp;db=pubmed&amp;dopt=Abstract&amp;list_uids=27446408">http://www.ncbi.nlm.nih.gov/entrez/query.fcgi?cmd=Retrieve&amp;db=pubmed&amp;dopt=Abstract&amp;list_uids=27446408</a>  6 Oncol Lett 12 2 Aug 2016 JOURNAL ARTICLE   |

|          |         |                                                                                                                                                                                                                                                                                                       |
|----------|---------|-------------------------------------------------------------------------------------------------------------------------------------------------------------------------------------------------------------------------------------------------------------------------------------------------------|
| dlc1     | hcc     | <a href="http://www.ncbi.nlm.nih.gov/entrez/query.fcgi?cmd=Retrieve&amp;db=pubmed&amp;dopt=Abstract&amp;list_uids=27446476">http://www.ncbi.nlm.nih.gov/entrez/query.fcgi?cmd=Retrieve&amp;db=pubmed&amp;dopt=Abstract&amp;list_uids=27446476</a>  6 Oncol Lett 12 2 Aug 2016 JOURNAL ARTICLE         |
| dlc1     | rhoa    | <a href="http://www.ncbi.nlm.nih.gov/entrez/query.fcgi?cmd=Retrieve&amp;db=pubmed&amp;dopt=Abstract&amp;list_uids=27446476">http://www.ncbi.nlm.nih.gov/entrez/query.fcgi?cmd=Retrieve&amp;db=pubmed&amp;dopt=Abstract&amp;list_uids=27446476</a>  6 Oncol Lett 12 2 Aug 2016 JOURNAL ARTICLE         |
| slurp1   | tp53    | <a href="http://www.ncbi.nlm.nih.gov/entrez/query.fcgi?cmd=Retrieve&amp;db=pubmed&amp;dopt=Abstract&amp;list_uids=27447121">http://www.ncbi.nlm.nih.gov/entrez/query.fcgi?cmd=Retrieve&amp;db=pubmed&amp;dopt=Abstract&amp;list_uids=27447121</a>  6 Biomed Pharmacother 83  Jul 2016 JOURNAL ARTICLE |
| cdkn2a   | tp53    | <a href="http://www.ncbi.nlm.nih.gov/entrez/query.fcgi?cmd=Retrieve&amp;db=pubmed&amp;dopt=Abstract&amp;list_uids=27447534">http://www.ncbi.nlm.nih.gov/entrez/query.fcgi?cmd=Retrieve&amp;db=pubmed&amp;dopt=Abstract&amp;list_uids=27447534</a>  6 J Pathol   Jul 2016 JOURNAL ARTICLE              |
| braf     | pik3ca  | <a href="http://www.ncbi.nlm.nih.gov/entrez/query.fcgi?cmd=Retrieve&amp;db=pubmed&amp;dopt=Abstract&amp;list_uids=27448973">http://www.ncbi.nlm.nih.gov/entrez/query.fcgi?cmd=Retrieve&amp;db=pubmed&amp;dopt=Abstract&amp;list_uids=27448973</a>  6 Oncotarget   Jul 2016 JOURNAL ARTICLE            |
| usp14    | uts2r   | <a href="http://www.ncbi.nlm.nih.gov/entrez/query.fcgi?cmd=Retrieve&amp;db=pubmed&amp;dopt=Abstract&amp;list_uids=27448976">http://www.ncbi.nlm.nih.gov/entrez/query.fcgi?cmd=Retrieve&amp;db=pubmed&amp;dopt=Abstract&amp;list_uids=27448976</a>  6 Oncotarget   Jul 2016 JOURNAL ARTICLE            |
| c9orf140 | eif2ak3 | <a href="http://www.ncbi.nlm.nih.gov/entrez/query.fcgi?cmd=Retrieve&amp;db=pubmed&amp;dopt=Abstract&amp;list_uids=27449033">http://www.ncbi.nlm.nih.gov/entrez/query.fcgi?cmd=Retrieve&amp;db=pubmed&amp;dopt=Abstract&amp;list_uids=27449033</a>  6 Tumour Biol   Jul 2016 JOURNAL ARTICLE           |
| vav3     | wnk1    | <a href="http://www.ncbi.nlm.nih.gov/entrez/query.fcgi?cmd=Retrieve&amp;db=pubmed&amp;dopt=Abstract&amp;list_uids=27453460">http://www.ncbi.nlm.nih.gov/entrez/query.fcgi?cmd=Retrieve&amp;db=pubmed&amp;dopt=Abstract&amp;list_uids=27453460</a>  6 Pancreatology   Jul 2016 JOURNAL ARTICLE         |
| vav3     | akt1    | <a href="http://www.ncbi.nlm.nih.gov/entrez/query.fcgi?cmd=Retrieve&amp;db=pubmed&amp;dopt=Abstract&amp;list_uids=27453460">http://www.ncbi.nlm.nih.gov/entrez/query.fcgi?cmd=Retrieve&amp;db=pubmed&amp;dopt=Abstract&amp;list_uids=27453460</a>  6 Pancreatology   Jul 2016 JOURNAL ARTICLE         |
| vav3     | rac1    | <a href="http://www.ncbi.nlm.nih.gov/entrez/query.fcgi?cmd=Retrieve&amp;db=pubmed&amp;dopt=Abstract&amp;list_uids=27453460">http://www.ncbi.nlm.nih.gov/entrez/query.fcgi?cmd=Retrieve&amp;db=pubmed&amp;dopt=Abstract&amp;list_uids=27453460</a>  6 Pancreatology   Jul 2016 JOURNAL ARTICLE         |
| mirn34a  | hmgb1   | <a href="http://www.ncbi.nlm.nih.gov/entrez/query.fcgi?cmd=Retrieve&amp;db=pubmed&amp;dopt=Abstract&amp;list_uids=27456356">http://www.ncbi.nlm.nih.gov/entrez/query.fcgi?cmd=Retrieve&amp;db=pubmed&amp;dopt=Abstract&amp;list_uids=27456356</a>  6 Tumour Biol   Jul 2016 JOURNAL ARTICLE           |
| sox9     | tgfb    | <a href="http://www.ncbi.nlm.nih.gov/entrez/query.fcgi?cmd=Retrieve&amp;db=pubmed&amp;dopt=Abstract&amp;list_uids=27457505">http://www.ncbi.nlm.nih.gov/entrez/query.fcgi?cmd=Retrieve&amp;db=pubmed&amp;dopt=Abstract&amp;list_uids=27457505</a>  6 Sci Rep 6   2016 Journal Article                 |
| sox9     | itk     | <a href="http://www.ncbi.nlm.nih.gov/entrez/query.fcgi?cmd=Retrieve&amp;db=pubmed&amp;dopt=Abstract&amp;list_uids=27457505">http://www.ncbi.nlm.nih.gov/entrez/query.fcgi?cmd=Retrieve&amp;db=pubmed&amp;dopt=Abstract&amp;list_uids=27457505</a>  6 Sci Rep 6   2016 Journal Article                 |
| hcfclr1  | akt1    | <a href="http://www.ncbi.nlm.nih.gov/entrez/query.fcgi?cmd=Retrieve&amp;db=pubmed&amp;dopt=Abstract&amp;list_uids=27458096">http://www.ncbi.nlm.nih.gov/entrez/query.fcgi?cmd=Retrieve&amp;db=pubmed&amp;dopt=Abstract&amp;list_uids=27458096</a>  6 Oncol Res 24 3  2016 Journal Article             |
| hcfclr1  | pik3ca  | <a href="http://www.ncbi.nlm.nih.gov/entrez/query.fcgi?cmd=Retrieve&amp;db=pubmed&amp;dopt=Abstract&amp;list_uids=27458096">http://www.ncbi.nlm.nih.gov/entrez/query.fcgi?cmd=Retrieve&amp;db=pubmed&amp;dopt=Abstract&amp;list_uids=27458096</a>  6 Oncol Res 24 3  2016 Journal Article             |
| pftk1    | myc     | <a href="http://www.ncbi.nlm.nih.gov/entrez/query.fcgi?cmd=Retrieve&amp;db=pubmed&amp;dopt=Abstract&amp;list_uids=27458099">http://www.ncbi.nlm.nih.gov/entrez/query.fcgi?cmd=Retrieve&amp;db=pubmed&amp;dopt=Abstract&amp;list_uids=27458099</a>  6 Oncol Res 24 3  2016 Journal Article             |
| tsc2     | ephb2   | <a href="http://www.ncbi.nlm.nih.gov/entrez/query.fcgi?cmd=Retrieve&amp;db=pubmed&amp;dopt=Abstract&amp;list_uids=27458154">http://www.ncbi.nlm.nih.gov/entrez/query.fcgi?cmd=Retrieve&amp;db=pubmed&amp;dopt=Abstract&amp;list_uids=27458154</a>  6 Oncotarget   Jul 2016 JOURNAL ARTICLE            |
| capza1   | src     | <a href="http://www.ncbi.nlm.nih.gov/entrez/query.fcgi?cmd=Retrieve&amp;db=pubmed&amp;dopt=Abstract&amp;list_uids=27458171">http://www.ncbi.nlm.nih.gov/entrez/query.fcgi?cmd=Retrieve&amp;db=pubmed&amp;dopt=Abstract&amp;list_uids=27458171</a>  6 Oncotarget   Jul 2016 JOURNAL ARTICLE            |

|         |        |                                                                                                                                                                                                                                                                                                                       |
|---------|--------|-----------------------------------------------------------------------------------------------------------------------------------------------------------------------------------------------------------------------------------------------------------------------------------------------------------------------|
| capza1  | jak1   | <a href="http://www.ncbi.nlm.nih.gov/entrez/query.fcgi?cmd=Retrieve&amp;db=pubmed&amp;dopt=Abstract&amp;list_uids=27458171">http://www.ncbi.nlm.nih.gov/entrez/query.fcgi?cmd=Retrieve&amp;db=pubmed&amp;dopt=Abstract&amp;list_uids=27458171</a>  6 Oncotarget  Jul 2016 JOURNAL ARTICLE                             |
| capza1  | stat3  | <a href="http://www.ncbi.nlm.nih.gov/entrez/query.fcgi?cmd=Retrieve&amp;db=pubmed&amp;dopt=Abstract&amp;list_uids=27458171">http://www.ncbi.nlm.nih.gov/entrez/query.fcgi?cmd=Retrieve&amp;db=pubmed&amp;dopt=Abstract&amp;list_uids=27458171</a>  6 Oncotarget  Jul 2016 JOURNAL ARTICLE                             |
| id1     | hcc    | <a href="http://www.ncbi.nlm.nih.gov/entrez/query.fcgi?cmd=Retrieve&amp;db=pubmed&amp;dopt=Abstract&amp;list_uids=27459117">http://www.ncbi.nlm.nih.gov/entrez/query.fcgi?cmd=Retrieve&amp;db=pubmed&amp;dopt=Abstract&amp;list_uids=27459117</a>  6 Biomed Pharmacother 83  Jul 2016 JOURNAL ARTICLE                 |
| id1     | sgcb   | <a href="http://www.ncbi.nlm.nih.gov/entrez/query.fcgi?cmd=Retrieve&amp;db=pubmed&amp;dopt=Abstract&amp;list_uids=27466488">http://www.ncbi.nlm.nih.gov/entrez/query.fcgi?cmd=Retrieve&amp;db=pubmed&amp;dopt=Abstract&amp;list_uids=27466488</a>  6 Anticancer Res 36 8 Aug 2016 Journal Article                     |
| hbe1    | nqo1   | <a href="http://www.ncbi.nlm.nih.gov/entrez/query.fcgi?cmd=Retrieve&amp;db=pubmed&amp;dopt=Abstract&amp;list_uids=27459794">http://www.ncbi.nlm.nih.gov/entrez/query.fcgi?cmd=Retrieve&amp;db=pubmed&amp;dopt=Abstract&amp;list_uids=27459794</a>  6 Wei Sheng Yan Jiu 45 3 May 2016 English Abstract,Journal Article |
| hmox1   | nqo1   | <a href="http://www.ncbi.nlm.nih.gov/entrez/query.fcgi?cmd=Retrieve&amp;db=pubmed&amp;dopt=Abstract&amp;list_uids=27459794">http://www.ncbi.nlm.nih.gov/entrez/query.fcgi?cmd=Retrieve&amp;db=pubmed&amp;dopt=Abstract&amp;list_uids=27459794</a>  6 Wei Sheng Yan Jiu 45 3 May 2016 English Abstract,Journal Article |
| hmox1   | hbe1   | <a href="http://www.ncbi.nlm.nih.gov/entrez/query.fcgi?cmd=Retrieve&amp;db=pubmed&amp;dopt=Abstract&amp;list_uids=27459794">http://www.ncbi.nlm.nih.gov/entrez/query.fcgi?cmd=Retrieve&amp;db=pubmed&amp;dopt=Abstract&amp;list_uids=27459794</a>  6 Wei Sheng Yan Jiu 45 3 May 2016 English Abstract,Journal Article |
| hmox1   | gabpa  | <a href="http://www.ncbi.nlm.nih.gov/entrez/query.fcgi?cmd=Retrieve&amp;db=pubmed&amp;dopt=Abstract&amp;list_uids=27459794">http://www.ncbi.nlm.nih.gov/entrez/query.fcgi?cmd=Retrieve&amp;db=pubmed&amp;dopt=Abstract&amp;list_uids=27459794</a>  6 Wei Sheng Yan Jiu 45 3 May 2016 English Abstract,Journal Article |
| rplp0p2 | dld    | <a href="http://www.ncbi.nlm.nih.gov/entrez/query.fcgi?cmd=Retrieve&amp;db=pubmed&amp;dopt=Abstract&amp;list_uids=27460542">http://www.ncbi.nlm.nih.gov/entrez/query.fcgi?cmd=Retrieve&amp;db=pubmed&amp;dopt=Abstract&amp;list_uids=27460542</a>  6 Oncol Rep 36 3 Sep 2016 Journal Article                          |
| mirn33a | uts2r  | <a href="http://www.ncbi.nlm.nih.gov/entrez/query.fcgi?cmd=Retrieve&amp;db=pubmed&amp;dopt=Abstract&amp;list_uids=27460728">http://www.ncbi.nlm.nih.gov/entrez/query.fcgi?cmd=Retrieve&amp;db=pubmed&amp;dopt=Abstract&amp;list_uids=27460728</a>  6 Eur Rev Med Pharmacol Sci 20 14 Jul 2016 Journal Article         |
| mirn33a | twist1 | <a href="http://www.ncbi.nlm.nih.gov/entrez/query.fcgi?cmd=Retrieve&amp;db=pubmed&amp;dopt=Abstract&amp;list_uids=27460728">http://www.ncbi.nlm.nih.gov/entrez/query.fcgi?cmd=Retrieve&amp;db=pubmed&amp;dopt=Abstract&amp;list_uids=27460728</a>  6 Eur Rev Med Pharmacol Sci 20 14 Jul 2016 Journal Article         |
| glipr1  | gde1   | <a href="http://www.ncbi.nlm.nih.gov/entrez/query.fcgi?cmd=Retrieve&amp;db=pubmed&amp;dopt=Abstract&amp;list_uids=27460987">http://www.ncbi.nlm.nih.gov/entrez/query.fcgi?cmd=Retrieve&amp;db=pubmed&amp;dopt=Abstract&amp;list_uids=27460987</a>  6 Oncol Rep 36 3 Sep 2016 Journal Article                          |
| mecp2   | cldn6  | <a href="http://www.ncbi.nlm.nih.gov/entrez/query.fcgi?cmd=Retrieve&amp;db=pubmed&amp;dopt=Abstract&amp;list_uids=27461117">http://www.ncbi.nlm.nih.gov/entrez/query.fcgi?cmd=Retrieve&amp;db=pubmed&amp;dopt=Abstract&amp;list_uids=27461117</a>  6 J Exp Clin Cancer Res 35 1  2016 Journal Article                 |
| cldn6   | prdx2  | <a href="http://www.ncbi.nlm.nih.gov/entrez/query.fcgi?cmd=Retrieve&amp;db=pubmed&amp;dopt=Abstract&amp;list_uids=27461117">http://www.ncbi.nlm.nih.gov/entrez/query.fcgi?cmd=Retrieve&amp;db=pubmed&amp;dopt=Abstract&amp;list_uids=27461117</a>  6 J Exp Clin Cancer Res 35 1  2016 Journal Article                 |
| prdx2   | mecp2  | <a href="http://www.ncbi.nlm.nih.gov/entrez/query.fcgi?cmd=Retrieve&amp;db=pubmed&amp;dopt=Abstract&amp;list_uids=27461117">http://www.ncbi.nlm.nih.gov/entrez/query.fcgi?cmd=Retrieve&amp;db=pubmed&amp;dopt=Abstract&amp;list_uids=27461117</a>  6 J Exp Clin Cancer Res 35 1  2016 Journal Article                 |
| msmb    | cldn6  | <a href="http://www.ncbi.nlm.nih.gov/entrez/query.fcgi?cmd=Retrieve&amp;db=pubmed&amp;dopt=Abstract&amp;list_uids=27461117">http://www.ncbi.nlm.nih.gov/entrez/query.fcgi?cmd=Retrieve&amp;db=pubmed&amp;dopt=Abstract&amp;list_uids=27461117</a>  6 J Exp Clin Cancer Res 35 1  2016 Journal Article                 |
| mirn451 | hcc    | <a href="http://www.ncbi.nlm.nih.gov/entrez/query.fcgi?cmd=Retrieve&amp;db=pubmed&amp;dopt=Abstract&amp;list_uids=27461244">http://www.ncbi.nlm.nih.gov/entrez/query.fcgi?cmd=Retrieve&amp;db=pubmed&amp;dopt=Abstract&amp;list_uids=27461244</a>  6 Oncol Rep 36 3 Sep 2016 Journal Article                          |
| wwp2    | atp2c1 | <a href="http://www.ncbi.nlm.nih.gov/entrez/query.fcgi?cmd=Retrieve&amp;db=pubmed&amp;dopt=Abstract&amp;list_uids=27462019">http://www.ncbi.nlm.nih.gov/entrez/query.fcgi?cmd=Retrieve&amp;db=pubmed&amp;dopt=Abstract&amp;list_uids=27462019</a>  6 Biochem Biophys Res Commun   Jul 2016 JOURNAL ARTICLE            |



|         |        |                                                                                                                                                                                                                                                                                                     |
|---------|--------|-----------------------------------------------------------------------------------------------------------------------------------------------------------------------------------------------------------------------------------------------------------------------------------------------------|
| s100a8  | hcc    | <a href="http://www.ncbi.nlm.nih.gov/entrez/query.fcgi?cmd=Retrieve&amp;db=pubmed&amp;dopt=Abstract&amp;list_uids=27462864">http://www.ncbi.nlm.nih.gov/entrez/query.fcgi?cmd=Retrieve&amp;db=pubmed&amp;dopt=Abstract&amp;list_uids=27462864</a>  6 Oncotarget  Jul 2016 JOURNAL ARTICLE           |
| socs2   | hcc    | <a href="http://www.ncbi.nlm.nih.gov/entrez/query.fcgi?cmd=Retrieve&amp;db=pubmed&amp;dopt=Abstract&amp;list_uids=27465557">http://www.ncbi.nlm.nih.gov/entrez/query.fcgi?cmd=Retrieve&amp;db=pubmed&amp;dopt=Abstract&amp;list_uids=27465557</a>  6 Tumour Biol  Jul 2016 JOURNAL ARTICLE          |
| sgcb    | jag1   | <a href="http://www.ncbi.nlm.nih.gov/entrez/query.fcgi?cmd=Retrieve&amp;db=pubmed&amp;dopt=Abstract&amp;list_uids=27542217">http://www.ncbi.nlm.nih.gov/entrez/query.fcgi?cmd=Retrieve&amp;db=pubmed&amp;dopt=Abstract&amp;list_uids=27542217</a>  6 Oncotarget  Aug 2016 JOURNAL ARTICLE           |
| tdgf1   | rln2   | <a href="http://www.ncbi.nlm.nih.gov/entrez/query.fcgi?cmd=Retrieve&amp;db=pubmed&amp;dopt=Abstract&amp;list_uids=27467944">http://www.ncbi.nlm.nih.gov/entrez/query.fcgi?cmd=Retrieve&amp;db=pubmed&amp;dopt=Abstract&amp;list_uids=27467944</a>  6 Oncoimmunology 5 5 May 2016 Journal Article    |
| tdgf1   | cd8a   | <a href="http://www.ncbi.nlm.nih.gov/entrez/query.fcgi?cmd=Retrieve&amp;db=pubmed&amp;dopt=Abstract&amp;list_uids=27467944">http://www.ncbi.nlm.nih.gov/entrez/query.fcgi?cmd=Retrieve&amp;db=pubmed&amp;dopt=Abstract&amp;list_uids=27467944</a>  6 Oncoimmunology 5 5 May 2016 Journal Article    |
| itgb2   | itgam  | <a href="http://www.ncbi.nlm.nih.gov/entrez/query.fcgi?cmd=Retrieve&amp;db=pubmed&amp;dopt=Abstract&amp;list_uids=27468683">http://www.ncbi.nlm.nih.gov/entrez/query.fcgi?cmd=Retrieve&amp;db=pubmed&amp;dopt=Abstract&amp;list_uids=27468683</a>  6 Microbiology Immunol  Jul 2016 JOURNAL ARTICLE |
| itgal   | itgam  | <a href="http://www.ncbi.nlm.nih.gov/entrez/query.fcgi?cmd=Retrieve&amp;db=pubmed&amp;dopt=Abstract&amp;list_uids=27468683">http://www.ncbi.nlm.nih.gov/entrez/query.fcgi?cmd=Retrieve&amp;db=pubmed&amp;dopt=Abstract&amp;list_uids=27468683</a>  6 Microbiology Immunol  Jul 2016 JOURNAL ARTICLE |
| itgal   | itgb2  | <a href="http://www.ncbi.nlm.nih.gov/entrez/query.fcgi?cmd=Retrieve&amp;db=pubmed&amp;dopt=Abstract&amp;list_uids=27468683">http://www.ncbi.nlm.nih.gov/entrez/query.fcgi?cmd=Retrieve&amp;db=pubmed&amp;dopt=Abstract&amp;list_uids=27468683</a>  6 Microbiology Immunol  Jul 2016 JOURNAL ARTICLE |
| plg     | nhs    | <a href="http://www.ncbi.nlm.nih.gov/entrez/query.fcgi?cmd=Retrieve&amp;db=pubmed&amp;dopt=Abstract&amp;list_uids=27468683">http://www.ncbi.nlm.nih.gov/entrez/query.fcgi?cmd=Retrieve&amp;db=pubmed&amp;dopt=Abstract&amp;list_uids=27468683</a>  6 Microbiology Immunol  Jul 2016 JOURNAL ARTICLE |
| mirn433 | notch1 | <a href="http://www.ncbi.nlm.nih.gov/entrez/query.fcgi?cmd=Retrieve&amp;db=pubmed&amp;dopt=Abstract&amp;list_uids=27468873">http://www.ncbi.nlm.nih.gov/entrez/query.fcgi?cmd=Retrieve&amp;db=pubmed&amp;dopt=Abstract&amp;list_uids=27468873</a>  6 Neoplasma 63 5 Jul 2016 JOURNAL ARTICLE        |
| cbl     | grb2   | <a href="http://www.ncbi.nlm.nih.gov/entrez/query.fcgi?cmd=Retrieve&amp;db=pubmed&amp;dopt=Abstract&amp;list_uids=27472394">http://www.ncbi.nlm.nih.gov/entrez/query.fcgi?cmd=Retrieve&amp;db=pubmed&amp;dopt=Abstract&amp;list_uids=27472394</a>  6 Oncotarget  Jul 2016 JOURNAL ARTICLE           |
| cbl     | src    | <a href="http://www.ncbi.nlm.nih.gov/entrez/query.fcgi?cmd=Retrieve&amp;db=pubmed&amp;dopt=Abstract&amp;list_uids=27472394">http://www.ncbi.nlm.nih.gov/entrez/query.fcgi?cmd=Retrieve&amp;db=pubmed&amp;dopt=Abstract&amp;list_uids=27472394</a>  6 Oncotarget  Jul 2016 JOURNAL ARTICLE           |
| cbl     | ptk2   | <a href="http://www.ncbi.nlm.nih.gov/entrez/query.fcgi?cmd=Retrieve&amp;db=pubmed&amp;dopt=Abstract&amp;list_uids=27472394">http://www.ncbi.nlm.nih.gov/entrez/query.fcgi?cmd=Retrieve&amp;db=pubmed&amp;dopt=Abstract&amp;list_uids=27472394</a>  6 Oncotarget  Jul 2016 JOURNAL ARTICLE           |
| mirn122 | tp53   | <a href="http://www.ncbi.nlm.nih.gov/entrez/query.fcgi?cmd=Retrieve&amp;db=pubmed&amp;dopt=Abstract&amp;list_uids=27472451">http://www.ncbi.nlm.nih.gov/entrez/query.fcgi?cmd=Retrieve&amp;db=pubmed&amp;dopt=Abstract&amp;list_uids=27472451</a>  6 Med Sci Monit 22  2016 Journal Article         |
| mirn122 | uts2r  | <a href="http://www.ncbi.nlm.nih.gov/entrez/query.fcgi?cmd=Retrieve&amp;db=pubmed&amp;dopt=Abstract&amp;list_uids=27508026">http://www.ncbi.nlm.nih.gov/entrez/query.fcgi?cmd=Retrieve&amp;db=pubmed&amp;dopt=Abstract&amp;list_uids=27508026</a>  6 Am J Transl Res 8 7  2016 Journal Article      |
| mirn122 | vegfc  | <a href="http://www.ncbi.nlm.nih.gov/entrez/query.fcgi?cmd=Retrieve&amp;db=pubmed&amp;dopt=Abstract&amp;list_uids=27508026">http://www.ncbi.nlm.nih.gov/entrez/query.fcgi?cmd=Retrieve&amp;db=pubmed&amp;dopt=Abstract&amp;list_uids=27508026</a>  6 Am J Transl Res 8 7  2016 Journal Article      |
| rbpj    | gsc    | <a href="http://www.ncbi.nlm.nih.gov/entrez/query.fcgi?cmd=Retrieve&amp;db=pubmed&amp;dopt=Abstract&amp;list_uids=27472461">http://www.ncbi.nlm.nih.gov/entrez/query.fcgi?cmd=Retrieve&amp;db=pubmed&amp;dopt=Abstract&amp;list_uids=27472461</a>  6 Oncotarget  Jul 2016 JOURNAL ARTICLE           |
| sdcbp   | dll1   | <a href="http://www.ncbi.nlm.nih.gov/entrez/query.fcgi?cmd=Retrieve&amp;db=pubmed&amp;dopt=Abstract&amp;list_uids=27472461">http://www.ncbi.nlm.nih.gov/entrez/query.fcgi?cmd=Retrieve&amp;db=pubmed&amp;dopt=Abstract&amp;list_uids=27472461</a>  6 Oncotarget  Jul 2016 JOURNAL ARTICLE           |

|          |         |                                                                                                                                                                                                                                                                                                 |
|----------|---------|-------------------------------------------------------------------------------------------------------------------------------------------------------------------------------------------------------------------------------------------------------------------------------------------------|
| sdcbp    | notch1  | <a href="http://www.ncbi.nlm.nih.gov/entrez/query.fcgi?cmd=Retrieve&amp;db=pubmed&amp;dopt=Abstract&amp;list_uids=27472461">http://www.ncbi.nlm.nih.gov/entrez/query.fcgi?cmd=Retrieve&amp;db=pubmed&amp;dopt=Abstract&amp;list_uids=27472461</a>  6 Oncotarget  Jul 2016 JOURNAL ARTICLE       |
| sdcbp    | stat3   | <a href="http://www.ncbi.nlm.nih.gov/entrez/query.fcgi?cmd=Retrieve&amp;db=pubmed&amp;dopt=Abstract&amp;list_uids=27472461">http://www.ncbi.nlm.nih.gov/entrez/query.fcgi?cmd=Retrieve&amp;db=pubmed&amp;dopt=Abstract&amp;list_uids=27472461</a>  6 Oncotarget  Jul 2016 JOURNAL ARTICLE       |
| sdcbp    | sox2    | <a href="http://www.ncbi.nlm.nih.gov/entrez/query.fcgi?cmd=Retrieve&amp;db=pubmed&amp;dopt=Abstract&amp;list_uids=27472461">http://www.ncbi.nlm.nih.gov/entrez/query.fcgi?cmd=Retrieve&amp;db=pubmed&amp;dopt=Abstract&amp;list_uids=27472461</a>  6 Oncotarget  Jul 2016 JOURNAL ARTICLE       |
| sdcbp    | pou5f1  | <a href="http://www.ncbi.nlm.nih.gov/entrez/query.fcgi?cmd=Retrieve&amp;db=pubmed&amp;dopt=Abstract&amp;list_uids=27472461">http://www.ncbi.nlm.nih.gov/entrez/query.fcgi?cmd=Retrieve&amp;db=pubmed&amp;dopt=Abstract&amp;list_uids=27472461</a>  6 Oncotarget  Jul 2016 JOURNAL ARTICLE       |
| sdcbp    | nanog   | <a href="http://www.ncbi.nlm.nih.gov/entrez/query.fcgi?cmd=Retrieve&amp;db=pubmed&amp;dopt=Abstract&amp;list_uids=27472461">http://www.ncbi.nlm.nih.gov/entrez/query.fcgi?cmd=Retrieve&amp;db=pubmed&amp;dopt=Abstract&amp;list_uids=27472461</a>  6 Oncotarget  Jul 2016 JOURNAL ARTICLE       |
| nanog    | stat3   | <a href="http://www.ncbi.nlm.nih.gov/entrez/query.fcgi?cmd=Retrieve&amp;db=pubmed&amp;dopt=Abstract&amp;list_uids=27472461">http://www.ncbi.nlm.nih.gov/entrez/query.fcgi?cmd=Retrieve&amp;db=pubmed&amp;dopt=Abstract&amp;list_uids=27472461</a>  6 Oncotarget  Jul 2016 JOURNAL ARTICLE       |
| nanog    | sox2    | <a href="http://www.ncbi.nlm.nih.gov/entrez/query.fcgi?cmd=Retrieve&amp;db=pubmed&amp;dopt=Abstract&amp;list_uids=27472461">http://www.ncbi.nlm.nih.gov/entrez/query.fcgi?cmd=Retrieve&amp;db=pubmed&amp;dopt=Abstract&amp;list_uids=27472461</a>  6 Oncotarget  Jul 2016 JOURNAL ARTICLE       |
| nanog    | pou5f1  | <a href="http://www.ncbi.nlm.nih.gov/entrez/query.fcgi?cmd=Retrieve&amp;db=pubmed&amp;dopt=Abstract&amp;list_uids=27472461">http://www.ncbi.nlm.nih.gov/entrez/query.fcgi?cmd=Retrieve&amp;db=pubmed&amp;dopt=Abstract&amp;list_uids=27472461</a>  6 Oncotarget  Jul 2016 JOURNAL ARTICLE       |
| nanog    | stat6   | <a href="http://www.ncbi.nlm.nih.gov/entrez/query.fcgi?cmd=Retrieve&amp;db=pubmed&amp;dopt=Abstract&amp;list_uids=27533463">http://www.ncbi.nlm.nih.gov/entrez/query.fcgi?cmd=Retrieve&amp;db=pubmed&amp;dopt=Abstract&amp;list_uids=27533463</a>  6 Oncotarget  Aug 2016 JOURNAL ARTICLE       |
| nanog    | alcam   | <a href="http://www.ncbi.nlm.nih.gov/entrez/query.fcgi?cmd=Retrieve&amp;db=pubmed&amp;dopt=Abstract&amp;list_uids=27533463">http://www.ncbi.nlm.nih.gov/entrez/query.fcgi?cmd=Retrieve&amp;db=pubmed&amp;dopt=Abstract&amp;list_uids=27533463</a>  6 Oncotarget  Aug 2016 JOURNAL ARTICLE       |
| nanog    | prom1   | <a href="http://www.ncbi.nlm.nih.gov/entrez/query.fcgi?cmd=Retrieve&amp;db=pubmed&amp;dopt=Abstract&amp;list_uids=27533463">http://www.ncbi.nlm.nih.gov/entrez/query.fcgi?cmd=Retrieve&amp;db=pubmed&amp;dopt=Abstract&amp;list_uids=27533463</a>  6 Oncotarget  Aug 2016 JOURNAL ARTICLE       |
| nanog    | cd44    | <a href="http://www.ncbi.nlm.nih.gov/entrez/query.fcgi?cmd=Retrieve&amp;db=pubmed&amp;dopt=Abstract&amp;list_uids=27533463">http://www.ncbi.nlm.nih.gov/entrez/query.fcgi?cmd=Retrieve&amp;db=pubmed&amp;dopt=Abstract&amp;list_uids=27533463</a>  6 Oncotarget  Aug 2016 JOURNAL ARTICLE       |
| smad7    | ski     | <a href="http://www.ncbi.nlm.nih.gov/entrez/query.fcgi?cmd=Retrieve&amp;db=pubmed&amp;dopt=Abstract&amp;list_uids=27473823">http://www.ncbi.nlm.nih.gov/entrez/query.fcgi?cmd=Retrieve&amp;db=pubmed&amp;dopt=Abstract&amp;list_uids=27473823</a>  6 Cancer Lett 381 1 Oct 2016 Journal Article |
| smad7    | snord87 | <a href="http://www.ncbi.nlm.nih.gov/entrez/query.fcgi?cmd=Retrieve&amp;db=pubmed&amp;dopt=Abstract&amp;list_uids=27574009">http://www.ncbi.nlm.nih.gov/entrez/query.fcgi?cmd=Retrieve&amp;db=pubmed&amp;dopt=Abstract&amp;list_uids=27574009</a>  6 Oncol Rep  Aug 2016 JOURNAL ARTICLE        |
| 2.6.1.77 | mapk14  | <a href="http://www.ncbi.nlm.nih.gov/entrez/query.fcgi?cmd=Retrieve&amp;db=pubmed&amp;dopt=Abstract&amp;list_uids=27476935">http://www.ncbi.nlm.nih.gov/entrez/query.fcgi?cmd=Retrieve&amp;db=pubmed&amp;dopt=Abstract&amp;list_uids=27476935</a>  6 Biol Pharm Bull 39 8  2016 Journal Article |
| 2.6.1.77 | ephb2   | <a href="http://www.ncbi.nlm.nih.gov/entrez/query.fcgi?cmd=Retrieve&amp;db=pubmed&amp;dopt=Abstract&amp;list_uids=27476935">http://www.ncbi.nlm.nih.gov/entrez/query.fcgi?cmd=Retrieve&amp;db=pubmed&amp;dopt=Abstract&amp;list_uids=27476935</a>  6 Biol Pharm Bull 39 8  2016 Journal Article |
| tesc     | itk     | <a href="http://www.ncbi.nlm.nih.gov/entrez/query.fcgi?cmd=Retrieve&amp;db=pubmed&amp;dopt=Abstract&amp;list_uids=27485112">http://www.ncbi.nlm.nih.gov/entrez/query.fcgi?cmd=Retrieve&amp;db=pubmed&amp;dopt=Abstract&amp;list_uids=27485112</a>  6 Tumour Biol  Aug 2016 JOURNAL ARTICLE      |
| nr0b2    | rela    | <a href="http://www.ncbi.nlm.nih.gov/entrez/query.fcgi?cmd=Retrieve&amp;db=pubmed&amp;dopt=Abstract&amp;list_uids=27486225">http://www.ncbi.nlm.nih.gov/entrez/query.fcgi?cmd=Retrieve&amp;db=pubmed&amp;dopt=Abstract&amp;list_uids=27486225</a>  6 Mol Cancer Ther  Aug 2016 JOURNAL ARTICLE  |

|          |        |                                                                                                                                                                                                                                                                                                                      |
|----------|--------|----------------------------------------------------------------------------------------------------------------------------------------------------------------------------------------------------------------------------------------------------------------------------------------------------------------------|
| nr0b2    | ccl2   | <a href="http://www.ncbi.nlm.nih.gov/entrez/query.fcgi?cmd=Retrieve&amp;db=pubmed&amp;dopt=Abstract&amp;list_uids=27486225">http://www.ncbi.nlm.nih.gov/entrez/query.fcgi?cmd=Retrieve&amp;db=pubmed&amp;dopt=Abstract&amp;list_uids=27486225</a>  6 Mol Cancer Ther   Aug 2016 JOURNAL ARTICLE                      |
| nr0b2    | hcc    | <a href="http://www.ncbi.nlm.nih.gov/entrez/query.fcgi?cmd=Retrieve&amp;db=pubmed&amp;dopt=Abstract&amp;list_uids=27486225">http://www.ncbi.nlm.nih.gov/entrez/query.fcgi?cmd=Retrieve&amp;db=pubmed&amp;dopt=Abstract&amp;list_uids=27486225</a>  6 Mol Cancer Ther   Aug 2016 JOURNAL ARTICLE                      |
| spock1   | pcsk1  | <a href="http://www.ncbi.nlm.nih.gov/entrez/query.fcgi?cmd=Retrieve&amp;db=pubmed&amp;dopt=Abstract&amp;list_uids=27486308">http://www.ncbi.nlm.nih.gov/entrez/query.fcgi?cmd=Retrieve&amp;db=pubmed&amp;dopt=Abstract&amp;list_uids=27486308</a>  6 Drug Des Devel Ther 10   2016 Journal Article                   |
| tyro3    | mertk  | <a href="http://www.ncbi.nlm.nih.gov/entrez/query.fcgi?cmd=Retrieve&amp;db=pubmed&amp;dopt=Abstract&amp;list_uids=27486820">http://www.ncbi.nlm.nih.gov/entrez/query.fcgi?cmd=Retrieve&amp;db=pubmed&amp;dopt=Abstract&amp;list_uids=27486820</a>  6 Oncotarget   Jul 2016 JOURNAL ARTICLE                           |
| c16orf74 | ppp3ca | <a href="http://www.ncbi.nlm.nih.gov/entrez/query.fcgi?cmd=Retrieve&amp;db=pubmed&amp;dopt=Abstract&amp;list_uids=27486884">http://www.ncbi.nlm.nih.gov/entrez/query.fcgi?cmd=Retrieve&amp;db=pubmed&amp;dopt=Abstract&amp;list_uids=27486884</a>  6 Oncotarget   Jul 2016 JOURNAL ARTICLE                           |
| ctcf     | suz12  | <a href="http://www.ncbi.nlm.nih.gov/entrez/query.fcgi?cmd=Retrieve&amp;db=pubmed&amp;dopt=Abstract&amp;list_uids=27486969">http://www.ncbi.nlm.nih.gov/entrez/query.fcgi?cmd=Retrieve&amp;db=pubmed&amp;dopt=Abstract&amp;list_uids=27486969</a>  6 Oncotarget   Jul 2016 JOURNAL ARTICLE                           |
| igf2     | suz12  | <a href="http://www.ncbi.nlm.nih.gov/entrez/query.fcgi?cmd=Retrieve&amp;db=pubmed&amp;dopt=Abstract&amp;list_uids=27486969">http://www.ncbi.nlm.nih.gov/entrez/query.fcgi?cmd=Retrieve&amp;db=pubmed&amp;dopt=Abstract&amp;list_uids=27486969</a>  6 Oncotarget   Jul 2016 JOURNAL ARTICLE                           |
| igf2     | ctcf   | <a href="http://www.ncbi.nlm.nih.gov/entrez/query.fcgi?cmd=Retrieve&amp;db=pubmed&amp;dopt=Abstract&amp;list_uids=27486969">http://www.ncbi.nlm.nih.gov/entrez/query.fcgi?cmd=Retrieve&amp;db=pubmed&amp;dopt=Abstract&amp;list_uids=27486969</a>  6 Oncotarget   Jul 2016 JOURNAL ARTICLE                           |
| iqgap1   | ptk2   | <a href="http://www.ncbi.nlm.nih.gov/entrez/query.fcgi?cmd=Retrieve&amp;db=pubmed&amp;dopt=Abstract&amp;list_uids=27486972">http://www.ncbi.nlm.nih.gov/entrez/query.fcgi?cmd=Retrieve&amp;db=pubmed&amp;dopt=Abstract&amp;list_uids=27486972</a>  6 Oncotarget   Jul 2016 JOURNAL ARTICLE                           |
| npc1     | itk    | <a href="http://www.ncbi.nlm.nih.gov/entrez/query.fcgi?cmd=Retrieve&amp;db=pubmed&amp;dopt=Abstract&amp;list_uids=27584792">http://www.ncbi.nlm.nih.gov/entrez/query.fcgi?cmd=Retrieve&amp;db=pubmed&amp;dopt=Abstract&amp;list_uids=27584792</a>  6 Cell Death Dis 7 9  2016 Journal Article                        |
| pla2g7   | npc1   | <a href="http://www.ncbi.nlm.nih.gov/entrez/query.fcgi?cmd=Retrieve&amp;db=pubmed&amp;dopt=Abstract&amp;list_uids=27487154">http://www.ncbi.nlm.nih.gov/entrez/query.fcgi?cmd=Retrieve&amp;db=pubmed&amp;dopt=Abstract&amp;list_uids=27487154</a>  6 Oncotarget   Aug 2016 JOURNAL ARTICLE                           |
| tlr10    | slc6a4 | <a href="http://www.ncbi.nlm.nih.gov/entrez/query.fcgi?cmd=Retrieve&amp;db=pubmed&amp;dopt=Abstract&amp;list_uids=27488594">http://www.ncbi.nlm.nih.gov/entrez/query.fcgi?cmd=Retrieve&amp;db=pubmed&amp;dopt=Abstract&amp;list_uids=27488594</a>  6 Microb Ecol   Aug 2016 JOURNAL ARTICLE                          |
| nek3     | mapk3  | <a href="http://www.ncbi.nlm.nih.gov/entrez/query.fcgi?cmd=Retrieve&amp;db=pubmed&amp;dopt=Abstract&amp;list_uids=27489110">http://www.ncbi.nlm.nih.gov/entrez/query.fcgi?cmd=Retrieve&amp;db=pubmed&amp;dopt=Abstract&amp;list_uids=27489110</a>  6 J Biol Chem   Aug 2016 JOURNAL ARTICLE                          |
| nek3     | actin  | <a href="http://www.ncbi.nlm.nih.gov/entrez/query.fcgi?cmd=Retrieve&amp;db=pubmed&amp;dopt=Abstract&amp;list_uids=27489110">http://www.ncbi.nlm.nih.gov/entrez/query.fcgi?cmd=Retrieve&amp;db=pubmed&amp;dopt=Abstract&amp;list_uids=27489110</a>  6 J Biol Chem   Aug 2016 JOURNAL ARTICLE                          |
| prl      | actin  | <a href="http://www.ncbi.nlm.nih.gov/entrez/query.fcgi?cmd=Retrieve&amp;db=pubmed&amp;dopt=Abstract&amp;list_uids=27489110">http://www.ncbi.nlm.nih.gov/entrez/query.fcgi?cmd=Retrieve&amp;db=pubmed&amp;dopt=Abstract&amp;list_uids=27489110</a>  6 J Biol Chem   Aug 2016 JOURNAL ARTICLE                          |
| prl      | nek3   | <a href="http://www.ncbi.nlm.nih.gov/entrez/query.fcgi?cmd=Retrieve&amp;db=pubmed&amp;dopt=Abstract&amp;list_uids=27489110">http://www.ncbi.nlm.nih.gov/entrez/query.fcgi?cmd=Retrieve&amp;db=pubmed&amp;dopt=Abstract&amp;list_uids=27489110</a>  6 J Biol Chem   Aug 2016 JOURNAL ARTICLE                          |
| cd38     | cd34   | <a href="http://www.ncbi.nlm.nih.gov/entrez/query.fcgi?cmd=Retrieve&amp;db=pubmed&amp;dopt=Abstract&amp;list_uids=27489587">http://www.ncbi.nlm.nih.gov/entrez/query.fcgi?cmd=Retrieve&amp;db=pubmed&amp;dopt=Abstract&amp;list_uids=27489587</a>  6 Int J Hematol Oncol Stem Cell Res 10 3 Jul 2016 Journal Article |
| anxa4    | rela   | <a href="http://www.ncbi.nlm.nih.gov/entrez/query.fcgi?cmd=Retrieve&amp;db=pubmed&amp;dopt=Abstract&amp;list_uids=27491820">http://www.ncbi.nlm.nih.gov/entrez/query.fcgi?cmd=Retrieve&amp;db=pubmed&amp;dopt=Abstract&amp;list_uids=27491820</a>  6 Sci Rep 6   2016 Journal Article                                |

|         |         |                                                                                                                                                                                                                                                                                                            |
|---------|---------|------------------------------------------------------------------------------------------------------------------------------------------------------------------------------------------------------------------------------------------------------------------------------------------------------------|
| mmp8    | mmp13   | <a href="http://www.ncbi.nlm.nih.gov/entrez/query.fcgi?cmd=Retrieve&amp;db=pubmed&amp;dopt=Abstract&amp;list_uids=27491937">http://www.ncbi.nlm.nih.gov/entrez/query.fcgi?cmd=Retrieve&amp;db=pubmed&amp;dopt=Abstract&amp;list_uids=27491937</a>  6 Anticancer Agents Med Chem   Aug 2016 JOURNAL ARTICLE |
| cyr61   | itk     | <a href="http://www.ncbi.nlm.nih.gov/entrez/query.fcgi?cmd=Retrieve&amp;db=pubmed&amp;dopt=Abstract&amp;list_uids=27492459">http://www.ncbi.nlm.nih.gov/entrez/query.fcgi?cmd=Retrieve&amp;db=pubmed&amp;dopt=Abstract&amp;list_uids=27492459</a>  6 Tumour Biol   Aug 2016 JOURNAL ARTICLE                |
| cd24    | vegfa   | <a href="http://www.ncbi.nlm.nih.gov/entrez/query.fcgi?cmd=Retrieve&amp;db=pubmed&amp;dopt=Abstract&amp;list_uids=27494878">http://www.ncbi.nlm.nih.gov/entrez/query.fcgi?cmd=Retrieve&amp;db=pubmed&amp;dopt=Abstract&amp;list_uids=27494878</a>  6 Oncotarget   Aug 2016 JOURNAL ARTICLE                 |
| cd24    | stat3   | <a href="http://www.ncbi.nlm.nih.gov/entrez/query.fcgi?cmd=Retrieve&amp;db=pubmed&amp;dopt=Abstract&amp;list_uids=27494878">http://www.ncbi.nlm.nih.gov/entrez/query.fcgi?cmd=Retrieve&amp;db=pubmed&amp;dopt=Abstract&amp;list_uids=27494878</a>  6 Oncotarget   Aug 2016 JOURNAL ARTICLE                 |
| cd24    | hsp90a1 | <a href="http://www.ncbi.nlm.nih.gov/entrez/query.fcgi?cmd=Retrieve&amp;db=pubmed&amp;dopt=Abstract&amp;list_uids=27494878">http://www.ncbi.nlm.nih.gov/entrez/query.fcgi?cmd=Retrieve&amp;db=pubmed&amp;dopt=Abstract&amp;list_uids=27494878</a>  6 Oncotarget   Aug 2016 JOURNAL ARTICLE                 |
| nf1     | mirn10b | <a href="http://www.ncbi.nlm.nih.gov/entrez/query.fcgi?cmd=Retrieve&amp;db=pubmed&amp;dopt=Abstract&amp;list_uids=27494896">http://www.ncbi.nlm.nih.gov/entrez/query.fcgi?cmd=Retrieve&amp;db=pubmed&amp;dopt=Abstract&amp;list_uids=27494896</a>  6 Oncotarget   Aug 2016 JOURNAL ARTICLE                 |
| nf1     | rhoc    | <a href="http://www.ncbi.nlm.nih.gov/entrez/query.fcgi?cmd=Retrieve&amp;db=pubmed&amp;dopt=Abstract&amp;list_uids=27494896">http://www.ncbi.nlm.nih.gov/entrez/query.fcgi?cmd=Retrieve&amp;db=pubmed&amp;dopt=Abstract&amp;list_uids=27494896</a>  6 Oncotarget   Aug 2016 JOURNAL ARTICLE                 |
| rhoc    | mirn10b | <a href="http://www.ncbi.nlm.nih.gov/entrez/query.fcgi?cmd=Retrieve&amp;db=pubmed&amp;dopt=Abstract&amp;list_uids=27494896">http://www.ncbi.nlm.nih.gov/entrez/query.fcgi?cmd=Retrieve&amp;db=pubmed&amp;dopt=Abstract&amp;list_uids=27494896</a>  6 Oncotarget   Aug 2016 JOURNAL ARTICLE                 |
| mirn10b | jun     | <a href="http://www.ncbi.nlm.nih.gov/entrez/query.fcgi?cmd=Retrieve&amp;db=pubmed&amp;dopt=Abstract&amp;list_uids=27494896">http://www.ncbi.nlm.nih.gov/entrez/query.fcgi?cmd=Retrieve&amp;db=pubmed&amp;dopt=Abstract&amp;list_uids=27494896</a>  6 Oncotarget   Aug 2016 JOURNAL ARTICLE                 |
| mirn10b | pten    | <a href="http://www.ncbi.nlm.nih.gov/entrez/query.fcgi?cmd=Retrieve&amp;db=pubmed&amp;dopt=Abstract&amp;list_uids=27569213">http://www.ncbi.nlm.nih.gov/entrez/query.fcgi?cmd=Retrieve&amp;db=pubmed&amp;dopt=Abstract&amp;list_uids=27569213</a>  6 Cancer Res   Aug 2016 JOURNAL ARTICLE                 |
| mirn10b | dyrk1a  | <a href="http://www.ncbi.nlm.nih.gov/entrez/query.fcgi?cmd=Retrieve&amp;db=pubmed&amp;dopt=Abstract&amp;list_uids=27569213">http://www.ncbi.nlm.nih.gov/entrez/query.fcgi?cmd=Retrieve&amp;db=pubmed&amp;dopt=Abstract&amp;list_uids=27569213</a>  6 Cancer Res   Aug 2016 JOURNAL ARTICLE                 |
| mirn10b | tbx5    | <a href="http://www.ncbi.nlm.nih.gov/entrez/query.fcgi?cmd=Retrieve&amp;db=pubmed&amp;dopt=Abstract&amp;list_uids=27569213">http://www.ncbi.nlm.nih.gov/entrez/query.fcgi?cmd=Retrieve&amp;db=pubmed&amp;dopt=Abstract&amp;list_uids=27569213</a>  6 Cancer Res   Aug 2016 JOURNAL ARTICLE                 |
| rcbtb1  | glp-1   | <a href="http://www.ncbi.nlm.nih.gov/entrez/query.fcgi?cmd=Retrieve&amp;db=pubmed&amp;dopt=Abstract&amp;list_uids=27496641">http://www.ncbi.nlm.nih.gov/entrez/query.fcgi?cmd=Retrieve&amp;db=pubmed&amp;dopt=Abstract&amp;list_uids=27496641</a>  6 Mol Cell Endocrinol 436   Aug 2016 JOURNAL ARTICLE    |
| mirn140 | adam9   | <a href="http://www.ncbi.nlm.nih.gov/entrez/query.fcgi?cmd=Retrieve&amp;db=pubmed&amp;dopt=Abstract&amp;list_uids=27498787">http://www.ncbi.nlm.nih.gov/entrez/query.fcgi?cmd=Retrieve&amp;db=pubmed&amp;dopt=Abstract&amp;list_uids=27498787</a>  6 Oncol Rep   Aug 2016 JOURNAL ARTICLE                  |
| map3k2  | mirn186 | <a href="http://www.ncbi.nlm.nih.gov/entrez/query.fcgi?cmd=Retrieve&amp;db=pubmed&amp;dopt=Abstract&amp;list_uids=27498924">http://www.ncbi.nlm.nih.gov/entrez/query.fcgi?cmd=Retrieve&amp;db=pubmed&amp;dopt=Abstract&amp;list_uids=27498924</a>  6 Int J Oncol   Jul 2016 JOURNAL ARTICLE                |
| mirn107 | akt1    | <a href="http://www.ncbi.nlm.nih.gov/entrez/query.fcgi?cmd=Retrieve&amp;db=pubmed&amp;dopt=Abstract&amp;list_uids=27498977">http://www.ncbi.nlm.nih.gov/entrez/query.fcgi?cmd=Retrieve&amp;db=pubmed&amp;dopt=Abstract&amp;list_uids=27498977</a>  6 Int J Oncol   Jul 2016 JOURNAL ARTICLE                |
| mirn107 | pik3ca  | <a href="http://www.ncbi.nlm.nih.gov/entrez/query.fcgi?cmd=Retrieve&amp;db=pubmed&amp;dopt=Abstract&amp;list_uids=27498977">http://www.ncbi.nlm.nih.gov/entrez/query.fcgi?cmd=Retrieve&amp;db=pubmed&amp;dopt=Abstract&amp;list_uids=27498977</a>  6 Int J Oncol   Jul 2016 JOURNAL ARTICLE                |
| bdnf    | mirn107 | <a href="http://www.ncbi.nlm.nih.gov/entrez/query.fcgi?cmd=Retrieve&amp;db=pubmed&amp;dopt=Abstract&amp;list_uids=27498977">http://www.ncbi.nlm.nih.gov/entrez/query.fcgi?cmd=Retrieve&amp;db=pubmed&amp;dopt=Abstract&amp;list_uids=27498977</a>  6 Int J Oncol   Jul 2016 JOURNAL ARTICLE                |

|       |        |                                                                                                                                                                                                                                                                                                                |
|-------|--------|----------------------------------------------------------------------------------------------------------------------------------------------------------------------------------------------------------------------------------------------------------------------------------------------------------------|
| bdnf  | akt1   | <a href="http://www.ncbi.nlm.nih.gov/entrez/query.fcgi?cmd=Retrieve&amp;db=pubmed&amp;dopt=Abstract&amp;list_uids=27498977">http://www.ncbi.nlm.nih.gov/entrez/query.fcgi?cmd=Retrieve&amp;db=pubmed&amp;dopt=Abstract&amp;list_uids=27498977</a>  6 Int J Oncol   Jul 2016 JOURNAL ARTICLE                    |
| bdnf  | pik3ca | <a href="http://www.ncbi.nlm.nih.gov/entrez/query.fcgi?cmd=Retrieve&amp;db=pubmed&amp;dopt=Abstract&amp;list_uids=27498977">http://www.ncbi.nlm.nih.gov/entrez/query.fcgi?cmd=Retrieve&amp;db=pubmed&amp;dopt=Abstract&amp;list_uids=27498977</a>  6 Int J Oncol   Jul 2016 JOURNAL ARTICLE                    |
| mdm2  | tp53   | <a href="http://www.ncbi.nlm.nih.gov/entrez/query.fcgi?cmd=Retrieve&amp;db=pubmed&amp;dopt=Abstract&amp;list_uids=27499479">http://www.ncbi.nlm.nih.gov/entrez/query.fcgi?cmd=Retrieve&amp;db=pubmed&amp;dopt=Abstract&amp;list_uids=27499479</a>  6 Int J Oncol   Aug 2016 JOURNAL ARTICLE                    |
| mdm2  | frap1  | <a href="http://www.ncbi.nlm.nih.gov/entrez/query.fcgi?cmd=Retrieve&amp;db=pubmed&amp;dopt=Abstract&amp;list_uids=27499479">http://www.ncbi.nlm.nih.gov/entrez/query.fcgi?cmd=Retrieve&amp;db=pubmed&amp;dopt=Abstract&amp;list_uids=27499479</a>  6 Int J Oncol   Aug 2016 JOURNAL ARTICLE                    |
| pdgfd | itk    | <a href="http://www.ncbi.nlm.nih.gov/entrez/query.fcgi?cmd=Retrieve&amp;db=pubmed&amp;dopt=Abstract&amp;list_uids=27507215">http://www.ncbi.nlm.nih.gov/entrez/query.fcgi?cmd=Retrieve&amp;db=pubmed&amp;dopt=Abstract&amp;list_uids=27507215</a>  6 Biochem Biophys Res Commun 478 2 Sep 2016 Journal Article |
| pdgfd | ephb2  | <a href="http://www.ncbi.nlm.nih.gov/entrez/query.fcgi?cmd=Retrieve&amp;db=pubmed&amp;dopt=Abstract&amp;list_uids=27507215">http://www.ncbi.nlm.nih.gov/entrez/query.fcgi?cmd=Retrieve&amp;db=pubmed&amp;dopt=Abstract&amp;list_uids=27507215</a>  6 Biochem Biophys Res Commun 478 2 Sep 2016 Journal Article |
| pdgfd | akt1   | <a href="http://www.ncbi.nlm.nih.gov/entrez/query.fcgi?cmd=Retrieve&amp;db=pubmed&amp;dopt=Abstract&amp;list_uids=27507215">http://www.ncbi.nlm.nih.gov/entrez/query.fcgi?cmd=Retrieve&amp;db=pubmed&amp;dopt=Abstract&amp;list_uids=27507215</a>  6 Biochem Biophys Res Commun 478 2 Sep 2016 Journal Article |
| pdgfd | mapk14 | <a href="http://www.ncbi.nlm.nih.gov/entrez/query.fcgi?cmd=Retrieve&amp;db=pubmed&amp;dopt=Abstract&amp;list_uids=27507215">http://www.ncbi.nlm.nih.gov/entrez/query.fcgi?cmd=Retrieve&amp;db=pubmed&amp;dopt=Abstract&amp;list_uids=27507215</a>  6 Biochem Biophys Res Commun 478 2 Sep 2016 Journal Article |
| muc3a | muc13  | <a href="http://www.ncbi.nlm.nih.gov/entrez/query.fcgi?cmd=Retrieve&amp;db=pubmed&amp;dopt=Abstract&amp;list_uids=27507554">http://www.ncbi.nlm.nih.gov/entrez/query.fcgi?cmd=Retrieve&amp;db=pubmed&amp;dopt=Abstract&amp;list_uids=27507554</a>  6 J Gastrointest Surg   Aug 2016 JOURNAL ARTICLE            |
| lect2 | akt1   | <a href="http://www.ncbi.nlm.nih.gov/entrez/query.fcgi?cmd=Retrieve&amp;db=pubmed&amp;dopt=Abstract&amp;list_uids=27507763">http://www.ncbi.nlm.nih.gov/entrez/query.fcgi?cmd=Retrieve&amp;db=pubmed&amp;dopt=Abstract&amp;list_uids=27507763</a>  6 Sci Rep 6   2016 Journal Article                          |
| lect2 | vegfa  | <a href="http://www.ncbi.nlm.nih.gov/entrez/query.fcgi?cmd=Retrieve&amp;db=pubmed&amp;dopt=Abstract&amp;list_uids=27507763">http://www.ncbi.nlm.nih.gov/entrez/query.fcgi?cmd=Retrieve&amp;db=pubmed&amp;dopt=Abstract&amp;list_uids=27507763</a>  6 Sci Rep 6   2016 Journal Article                          |
| lect2 | hcc    | <a href="http://www.ncbi.nlm.nih.gov/entrez/query.fcgi?cmd=Retrieve&amp;db=pubmed&amp;dopt=Abstract&amp;list_uids=27507763">http://www.ncbi.nlm.nih.gov/entrez/query.fcgi?cmd=Retrieve&amp;db=pubmed&amp;dopt=Abstract&amp;list_uids=27507763</a>  6 Sci Rep 6   2016 Journal Article                          |
| vegfc | uts2r  | <a href="http://www.ncbi.nlm.nih.gov/entrez/query.fcgi?cmd=Retrieve&amp;db=pubmed&amp;dopt=Abstract&amp;list_uids=27508026">http://www.ncbi.nlm.nih.gov/entrez/query.fcgi?cmd=Retrieve&amp;db=pubmed&amp;dopt=Abstract&amp;list_uids=27508026</a>  6 Am J Transl Res 8 7  2016 Journal Article                 |
| ppa1  | hcc    | <a href="http://www.ncbi.nlm.nih.gov/entrez/query.fcgi?cmd=Retrieve&amp;db=pubmed&amp;dopt=Abstract&amp;list_uids=27509921">http://www.ncbi.nlm.nih.gov/entrez/query.fcgi?cmd=Retrieve&amp;db=pubmed&amp;dopt=Abstract&amp;list_uids=27509921</a>  6 Oncol Rep   Aug 2016 JOURNAL ARTICLE                      |
| ppa1  | akt1   | <a href="http://www.ncbi.nlm.nih.gov/entrez/query.fcgi?cmd=Retrieve&amp;db=pubmed&amp;dopt=Abstract&amp;list_uids=27509921">http://www.ncbi.nlm.nih.gov/entrez/query.fcgi?cmd=Retrieve&amp;db=pubmed&amp;dopt=Abstract&amp;list_uids=27509921</a>  6 Oncol Rep   Aug 2016 JOURNAL ARTICLE                      |
| nek2  | hcc    | <a href="http://www.ncbi.nlm.nih.gov/entrez/query.fcgi?cmd=Retrieve&amp;db=pubmed&amp;dopt=Abstract&amp;list_uids=27509921">http://www.ncbi.nlm.nih.gov/entrez/query.fcgi?cmd=Retrieve&amp;db=pubmed&amp;dopt=Abstract&amp;list_uids=27509921</a>  6 Oncol Rep   Aug 2016 JOURNAL ARTICLE                      |
| nek2  | akt1   | <a href="http://www.ncbi.nlm.nih.gov/entrez/query.fcgi?cmd=Retrieve&amp;db=pubmed&amp;dopt=Abstract&amp;list_uids=27509921">http://www.ncbi.nlm.nih.gov/entrez/query.fcgi?cmd=Retrieve&amp;db=pubmed&amp;dopt=Abstract&amp;list_uids=27509921</a>  6 Oncol Rep   Aug 2016 JOURNAL ARTICLE                      |
| nek2  | ppa1   | <a href="http://www.ncbi.nlm.nih.gov/entrez/query.fcgi?cmd=Retrieve&amp;db=pubmed&amp;dopt=Abstract&amp;list_uids=27509921">http://www.ncbi.nlm.nih.gov/entrez/query.fcgi?cmd=Retrieve&amp;db=pubmed&amp;dopt=Abstract&amp;list_uids=27509921</a>  6 Oncol Rep   Aug 2016 JOURNAL ARTICLE                      |

|         |          |                                                                                                                                                                                                                                                                                                               |
|---------|----------|---------------------------------------------------------------------------------------------------------------------------------------------------------------------------------------------------------------------------------------------------------------------------------------------------------------|
| il6r    | il6      | <a href="http://www.ncbi.nlm.nih.gov/entrez/query.fcgi?cmd=Retrieve&amp;db=pubmed&amp;dopt=Abstract&amp;list_uids=27510094">http://www.ncbi.nlm.nih.gov/entrez/query.fcgi?cmd=Retrieve&amp;db=pubmed&amp;dopt=Abstract&amp;list_uids=27510094</a>  6 Oncol Rep  Aug 2016 JOURNAL ARTICLE                      |
| mfi2    | foxp4    | <a href="http://www.ncbi.nlm.nih.gov/entrez/query.fcgi?cmd=Retrieve&amp;db=pubmed&amp;dopt=Abstract&amp;list_uids=27513470">http://www.ncbi.nlm.nih.gov/entrez/query.fcgi?cmd=Retrieve&amp;db=pubmed&amp;dopt=Abstract&amp;list_uids=27513470</a>  6 Oncol Rep  Aug 2016 JOURNAL ARTICLE                      |
| vcan    | il10     | <a href="http://www.ncbi.nlm.nih.gov/entrez/query.fcgi?cmd=Retrieve&amp;db=pubmed&amp;dopt=Abstract&amp;list_uids=27513864">http://www.ncbi.nlm.nih.gov/entrez/query.fcgi?cmd=Retrieve&amp;db=pubmed&amp;dopt=Abstract&amp;list_uids=27513864</a>  6 PLoS One 11 8  2016 Journal Article                      |
| cd80    | il10     | <a href="http://www.ncbi.nlm.nih.gov/entrez/query.fcgi?cmd=Retrieve&amp;db=pubmed&amp;dopt=Abstract&amp;list_uids=27513864">http://www.ncbi.nlm.nih.gov/entrez/query.fcgi?cmd=Retrieve&amp;db=pubmed&amp;dopt=Abstract&amp;list_uids=27513864</a>  6 PLoS One 11 8  2016 Journal Article                      |
| cd80    | vcan     | <a href="http://www.ncbi.nlm.nih.gov/entrez/query.fcgi?cmd=Retrieve&amp;db=pubmed&amp;dopt=Abstract&amp;list_uids=27513864">http://www.ncbi.nlm.nih.gov/entrez/query.fcgi?cmd=Retrieve&amp;db=pubmed&amp;dopt=Abstract&amp;list_uids=27513864</a>  6 PLoS One 11 8  2016 Journal Article                      |
| il1b    | il10     | <a href="http://www.ncbi.nlm.nih.gov/entrez/query.fcgi?cmd=Retrieve&amp;db=pubmed&amp;dopt=Abstract&amp;list_uids=27513864">http://www.ncbi.nlm.nih.gov/entrez/query.fcgi?cmd=Retrieve&amp;db=pubmed&amp;dopt=Abstract&amp;list_uids=27513864</a>  6 PLoS One 11 8  2016 Journal Article                      |
| il1b    | vcan     | <a href="http://www.ncbi.nlm.nih.gov/entrez/query.fcgi?cmd=Retrieve&amp;db=pubmed&amp;dopt=Abstract&amp;list_uids=27513864">http://www.ncbi.nlm.nih.gov/entrez/query.fcgi?cmd=Retrieve&amp;db=pubmed&amp;dopt=Abstract&amp;list_uids=27513864</a>  6 PLoS One 11 8  2016 Journal Article                      |
| il1b    | cd80     | <a href="http://www.ncbi.nlm.nih.gov/entrez/query.fcgi?cmd=Retrieve&amp;db=pubmed&amp;dopt=Abstract&amp;list_uids=27513864">http://www.ncbi.nlm.nih.gov/entrez/query.fcgi?cmd=Retrieve&amp;db=pubmed&amp;dopt=Abstract&amp;list_uids=27513864</a>  6 PLoS One 11 8  2016 Journal Article                      |
| il1b    | il8      | <a href="http://www.ncbi.nlm.nih.gov/entrez/query.fcgi?cmd=Retrieve&amp;db=pubmed&amp;dopt=Abstract&amp;list_uids=27513864">http://www.ncbi.nlm.nih.gov/entrez/query.fcgi?cmd=Retrieve&amp;db=pubmed&amp;dopt=Abstract&amp;list_uids=27513864</a>  6 PLoS One 11 8  2016 Journal Article                      |
| mirn126 | cxcr4    | <a href="http://www.ncbi.nlm.nih.gov/entrez/query.fcgi?cmd=Retrieve&amp;db=pubmed&amp;dopt=Abstract&amp;list_uids=27517626">http://www.ncbi.nlm.nih.gov/entrez/query.fcgi?cmd=Retrieve&amp;db=pubmed&amp;dopt=Abstract&amp;list_uids=27517626</a>  6 Oncotarget  Aug 2016 JOURNAL ARTICLE                     |
| mirn126 | rhoa     | <a href="http://www.ncbi.nlm.nih.gov/entrez/query.fcgi?cmd=Retrieve&amp;db=pubmed&amp;dopt=Abstract&amp;list_uids=27517626">http://www.ncbi.nlm.nih.gov/entrez/query.fcgi?cmd=Retrieve&amp;db=pubmed&amp;dopt=Abstract&amp;list_uids=27517626</a>  6 Oncotarget  Aug 2016 JOURNAL ARTICLE                     |
| mirn126 | uts2r    | <a href="http://www.ncbi.nlm.nih.gov/entrez/query.fcgi?cmd=Retrieve&amp;db=pubmed&amp;dopt=Abstract&amp;list_uids=27578985">http://www.ncbi.nlm.nih.gov/entrez/query.fcgi?cmd=Retrieve&amp;db=pubmed&amp;dopt=Abstract&amp;list_uids=27578985</a>  6 Oncotargets Ther 9   2016 Journal Article                |
| mirn126 | mirn216a | <a href="http://www.ncbi.nlm.nih.gov/entrez/query.fcgi?cmd=Retrieve&amp;db=pubmed&amp;dopt=Abstract&amp;list_uids=27578985">http://www.ncbi.nlm.nih.gov/entrez/query.fcgi?cmd=Retrieve&amp;db=pubmed&amp;dopt=Abstract&amp;list_uids=27578985</a>  6 Oncotargets Ther 9   2016 Journal Article                |
| mirn126 | akt1     | <a href="http://www.ncbi.nlm.nih.gov/entrez/query.fcgi?cmd=Retrieve&amp;db=pubmed&amp;dopt=Abstract&amp;list_uids=27578985">http://www.ncbi.nlm.nih.gov/entrez/query.fcgi?cmd=Retrieve&amp;db=pubmed&amp;dopt=Abstract&amp;list_uids=27578985</a>  6 Oncotargets Ther 9   2016 Journal Article                |
| mirn126 | pik3ca   | <a href="http://www.ncbi.nlm.nih.gov/entrez/query.fcgi?cmd=Retrieve&amp;db=pubmed&amp;dopt=Abstract&amp;list_uids=27578985">http://www.ncbi.nlm.nih.gov/entrez/query.fcgi?cmd=Retrieve&amp;db=pubmed&amp;dopt=Abstract&amp;list_uids=27578985</a>  6 Oncotargets Ther 9   2016 Journal Article                |
| mirn126 | pik3r2   | <a href="http://www.ncbi.nlm.nih.gov/entrez/query.fcgi?cmd=Retrieve&amp;db=pubmed&amp;dopt=Abstract&amp;list_uids=27578985">http://www.ncbi.nlm.nih.gov/entrez/query.fcgi?cmd=Retrieve&amp;db=pubmed&amp;dopt=Abstract&amp;list_uids=27578985</a>  6 Oncotargets Ther 9   2016 Journal Article                |
| mirn126 | rfxank   | <a href="http://www.ncbi.nlm.nih.gov/entrez/query.fcgi?cmd=Retrieve&amp;db=pubmed&amp;dopt=Abstract&amp;list_uids=27578985">http://www.ncbi.nlm.nih.gov/entrez/query.fcgi?cmd=Retrieve&amp;db=pubmed&amp;dopt=Abstract&amp;list_uids=27578985</a>  6 Oncotargets Ther 9   2016 Journal Article                |
| mirn126 | gata4    | <a href="http://www.ncbi.nlm.nih.gov/entrez/query.fcgi?cmd=Retrieve&amp;db=pubmed&amp;dopt=Abstract&amp;list_uids=27598297">http://www.ncbi.nlm.nih.gov/entrez/query.fcgi?cmd=Retrieve&amp;db=pubmed&amp;dopt=Abstract&amp;list_uids=27598297</a>  6 Artif Cells Nanomed Biotechnol  Sep 2016 JOURNAL ARTICLE |

|           |         |                                                                                                                                                                                                                                                                                                              |
|-----------|---------|--------------------------------------------------------------------------------------------------------------------------------------------------------------------------------------------------------------------------------------------------------------------------------------------------------------|
| smad3     | mapk14  | <a href="http://www.ncbi.nlm.nih.gov/entrez/query.fcgi?cmd=Retrieve&amp;db=pubmed&amp;dopt=Abstract&amp;list_uids=27519288">http://www.ncbi.nlm.nih.gov/entrez/query.fcgi?cmd=Retrieve&amp;db=pubmed&amp;dopt=Abstract&amp;list_uids=27519288</a>  6 Toxicology 366-367  Aug 2016 JOURNAL ARTICLE            |
| smad3     | mapk8   | <a href="http://www.ncbi.nlm.nih.gov/entrez/query.fcgi?cmd=Retrieve&amp;db=pubmed&amp;dopt=Abstract&amp;list_uids=27519288">http://www.ncbi.nlm.nih.gov/entrez/query.fcgi?cmd=Retrieve&amp;db=pubmed&amp;dopt=Abstract&amp;list_uids=27519288</a>  6 Toxicology 366-367  Aug 2016 JOURNAL ARTICLE            |
| ahr       | smad3   | <a href="http://www.ncbi.nlm.nih.gov/entrez/query.fcgi?cmd=Retrieve&amp;db=pubmed&amp;dopt=Abstract&amp;list_uids=27519288">http://www.ncbi.nlm.nih.gov/entrez/query.fcgi?cmd=Retrieve&amp;db=pubmed&amp;dopt=Abstract&amp;list_uids=27519288</a>  6 Toxicology 366-367  Aug 2016 JOURNAL ARTICLE            |
| ahr       | cyp1a1  | <a href="http://www.ncbi.nlm.nih.gov/entrez/query.fcgi?cmd=Retrieve&amp;db=pubmed&amp;dopt=Abstract&amp;list_uids=27519288">http://www.ncbi.nlm.nih.gov/entrez/query.fcgi?cmd=Retrieve&amp;db=pubmed&amp;dopt=Abstract&amp;list_uids=27519288</a>  6 Toxicology 366-367  Aug 2016 JOURNAL ARTICLE            |
| ahr       | ephb2   | <a href="http://www.ncbi.nlm.nih.gov/entrez/query.fcgi?cmd=Retrieve&amp;db=pubmed&amp;dopt=Abstract&amp;list_uids=27601158">http://www.ncbi.nlm.nih.gov/entrez/query.fcgi?cmd=Retrieve&amp;db=pubmed&amp;dopt=Abstract&amp;list_uids=27601158</a>  6 Int J Oncol   Aug 2016 JOURNAL ARTICLE                  |
| mirnlet7b | e2f2    | <a href="http://www.ncbi.nlm.nih.gov/entrez/query.fcgi?cmd=Retrieve&amp;db=pubmed&amp;dopt=Abstract&amp;list_uids=27520092">http://www.ncbi.nlm.nih.gov/entrez/query.fcgi?cmd=Retrieve&amp;db=pubmed&amp;dopt=Abstract&amp;list_uids=27520092</a>  6 J Physiol Biochem   Aug 2016 JOURNAL ARTICLE            |
| dclk1     | zeb1    | <a href="http://www.ncbi.nlm.nih.gov/entrez/query.fcgi?cmd=Retrieve&amp;db=pubmed&amp;dopt=Abstract&amp;list_uids=27520310">http://www.ncbi.nlm.nih.gov/entrez/query.fcgi?cmd=Retrieve&amp;db=pubmed&amp;dopt=Abstract&amp;list_uids=27520310</a>  6 J Cancer Res Clin Oncol 142 10 Oct 2016 Journal Article |
| dclk1     | itk     | <a href="http://www.ncbi.nlm.nih.gov/entrez/query.fcgi?cmd=Retrieve&amp;db=pubmed&amp;dopt=Abstract&amp;list_uids=27520310">http://www.ncbi.nlm.nih.gov/entrez/query.fcgi?cmd=Retrieve&amp;db=pubmed&amp;dopt=Abstract&amp;list_uids=27520310</a>  6 J Cancer Res Clin Oncol 142 10 Oct 2016 Journal Article |
| mirn132   | ttk     | <a href="http://www.ncbi.nlm.nih.gov/entrez/query.fcgi?cmd=Retrieve&amp;db=pubmed&amp;dopt=Abstract&amp;list_uids=27522003">http://www.ncbi.nlm.nih.gov/entrez/query.fcgi?cmd=Retrieve&amp;db=pubmed&amp;dopt=Abstract&amp;list_uids=27522003</a>  6 Biomed Pharmacother 83  Aug 2016 JOURNAL ARTICLE        |
| mirn132   | itk     | <a href="http://www.ncbi.nlm.nih.gov/entrez/query.fcgi?cmd=Retrieve&amp;db=pubmed&amp;dopt=Abstract&amp;list_uids=27527117">http://www.ncbi.nlm.nih.gov/entrez/query.fcgi?cmd=Retrieve&amp;db=pubmed&amp;dopt=Abstract&amp;list_uids=27527117</a>  6 Prostate   Aug 2016 JOURNAL ARTICLE                     |
| hlf       | ttk     | <a href="http://www.ncbi.nlm.nih.gov/entrez/query.fcgi?cmd=Retrieve&amp;db=pubmed&amp;dopt=Abstract&amp;list_uids=27522003">http://www.ncbi.nlm.nih.gov/entrez/query.fcgi?cmd=Retrieve&amp;db=pubmed&amp;dopt=Abstract&amp;list_uids=27522003</a>  6 Biomed Pharmacother 83  Aug 2016 JOURNAL ARTICLE        |
| hlf       | mirn132 | <a href="http://www.ncbi.nlm.nih.gov/entrez/query.fcgi?cmd=Retrieve&amp;db=pubmed&amp;dopt=Abstract&amp;list_uids=27522003">http://www.ncbi.nlm.nih.gov/entrez/query.fcgi?cmd=Retrieve&amp;db=pubmed&amp;dopt=Abstract&amp;list_uids=27522003</a>  6 Biomed Pharmacother 83  Aug 2016 JOURNAL ARTICLE        |
| foxa1     | fos     | <a href="http://www.ncbi.nlm.nih.gov/entrez/query.fcgi?cmd=Retrieve&amp;db=pubmed&amp;dopt=Abstract&amp;list_uids=27524420">http://www.ncbi.nlm.nih.gov/entrez/query.fcgi?cmd=Retrieve&amp;db=pubmed&amp;dopt=Abstract&amp;list_uids=27524420</a>  6 Oncogene   Aug 2016 JOURNAL ARTICLE                     |
| foxa1     | ervk2   | <a href="http://www.ncbi.nlm.nih.gov/entrez/query.fcgi?cmd=Retrieve&amp;db=pubmed&amp;dopt=Abstract&amp;list_uids=27524420">http://www.ncbi.nlm.nih.gov/entrez/query.fcgi?cmd=Retrieve&amp;db=pubmed&amp;dopt=Abstract&amp;list_uids=27524420</a>  6 Oncogene   Aug 2016 JOURNAL ARTICLE                     |
| foxa1     | itk     | <a href="http://www.ncbi.nlm.nih.gov/entrez/query.fcgi?cmd=Retrieve&amp;db=pubmed&amp;dopt=Abstract&amp;list_uids=27524420">http://www.ncbi.nlm.nih.gov/entrez/query.fcgi?cmd=Retrieve&amp;db=pubmed&amp;dopt=Abstract&amp;list_uids=27524420</a>  6 Oncogene   Aug 2016 JOURNAL ARTICLE                     |
| foxa1     | akap13  | <a href="http://www.ncbi.nlm.nih.gov/entrez/query.fcgi?cmd=Retrieve&amp;db=pubmed&amp;dopt=Abstract&amp;list_uids=27524420">http://www.ncbi.nlm.nih.gov/entrez/query.fcgi?cmd=Retrieve&amp;db=pubmed&amp;dopt=Abstract&amp;list_uids=27524420</a>  6 Oncogene   Aug 2016 JOURNAL ARTICLE                     |
| akap13    | itk     | <a href="http://www.ncbi.nlm.nih.gov/entrez/query.fcgi?cmd=Retrieve&amp;db=pubmed&amp;dopt=Abstract&amp;list_uids=27524420">http://www.ncbi.nlm.nih.gov/entrez/query.fcgi?cmd=Retrieve&amp;db=pubmed&amp;dopt=Abstract&amp;list_uids=27524420</a>  6 Oncogene   Aug 2016 JOURNAL ARTICLE                     |
| akap13    | twist1  | <a href="http://www.ncbi.nlm.nih.gov/entrez/query.fcgi?cmd=Retrieve&amp;db=pubmed&amp;dopt=Abstract&amp;list_uids=27524420">http://www.ncbi.nlm.nih.gov/entrez/query.fcgi?cmd=Retrieve&amp;db=pubmed&amp;dopt=Abstract&amp;list_uids=27524420</a>  6 Oncogene   Aug 2016 JOURNAL ARTICLE                     |

|           |         |                                                                                                                                                                                                                                                                                                                                         |
|-----------|---------|-----------------------------------------------------------------------------------------------------------------------------------------------------------------------------------------------------------------------------------------------------------------------------------------------------------------------------------------|
| cda       | hpd     | <a href="http://www.ncbi.nlm.nih.gov/entrez/query.fcgi?cmd=Retrieve&amp;db=pubmed&amp;dopt=Abstract&amp;list_uids=27527502">http://www.ncbi.nlm.nih.gov/entrez/query.fcgi?cmd=Retrieve&amp;db=pubmed&amp;dopt=Abstract&amp;list_uids=27527502</a>  6 BMC Genomics 17 1  2016 Journal Article                                            |
| slc9a1    | tnfsf13 | <a href="http://www.ncbi.nlm.nih.gov/entrez/query.fcgi?cmd=Retrieve&amp;db=pubmed&amp;dopt=Abstract&amp;list_uids=27529686">http://www.ncbi.nlm.nih.gov/entrez/query.fcgi?cmd=Retrieve&amp;db=pubmed&amp;dopt=Abstract&amp;list_uids=27529686</a>  6 Int J Cancer   Aug 2016 JOURNAL ARTICLE                                            |
| slc9a1    | hgf     | <a href="http://www.ncbi.nlm.nih.gov/entrez/query.fcgi?cmd=Retrieve&amp;db=pubmed&amp;dopt=Abstract&amp;list_uids=27529686">http://www.ncbi.nlm.nih.gov/entrez/query.fcgi?cmd=Retrieve&amp;db=pubmed&amp;dopt=Abstract&amp;list_uids=27529686</a>  6 Int J Cancer   Aug 2016 JOURNAL ARTICLE                                            |
| hgf       | tnfsf13 | <a href="http://www.ncbi.nlm.nih.gov/entrez/query.fcgi?cmd=Retrieve&amp;db=pubmed&amp;dopt=Abstract&amp;list_uids=27529686">http://www.ncbi.nlm.nih.gov/entrez/query.fcgi?cmd=Retrieve&amp;db=pubmed&amp;dopt=Abstract&amp;list_uids=27529686</a>  6 Int J Cancer   Aug 2016 JOURNAL ARTICLE                                            |
| angptl1   | itk     | <a href="http://www.ncbi.nlm.nih.gov/entrez/query.fcgi?cmd=Retrieve&amp;db=pubmed&amp;dopt=Abstract&amp;list_uids=27530187">http://www.ncbi.nlm.nih.gov/entrez/query.fcgi?cmd=Retrieve&amp;db=pubmed&amp;dopt=Abstract&amp;list_uids=27530187</a>  6 Hepatolo gy   Aug 2016 JOURNAL ARTICLE                                             |
| angptl1   | hcc     | <a href="http://www.ncbi.nlm.nih.gov/entrez/query.fcgi?cmd=Retrieve&amp;db=pubmed&amp;dopt=Abstract&amp;list_uids=27530187">http://www.ncbi.nlm.nih.gov/entrez/query.fcgi?cmd=Retrieve&amp;db=pubmed&amp;dopt=Abstract&amp;list_uids=27530187</a>  6 Hepatolo gy   Aug 2016 JOURNAL ARTICLE                                             |
| angptl1   | egr1    | <a href="http://www.ncbi.nlm.nih.gov/entrez/query.fcgi?cmd=Retrieve&amp;db=pubmed&amp;dopt=Abstract&amp;list_uids=27530187">http://www.ncbi.nlm.nih.gov/entrez/query.fcgi?cmd=Retrieve&amp;db=pubmed&amp;dopt=Abstract&amp;list_uids=27530187</a>  6 Hepatolo gy   Aug 2016 JOURNAL ARTICLE                                             |
| angptl1   | akt1    | <a href="http://www.ncbi.nlm.nih.gov/entrez/query.fcgi?cmd=Retrieve&amp;db=pubmed&amp;dopt=Abstract&amp;list_uids=27530187">http://www.ncbi.nlm.nih.gov/entrez/query.fcgi?cmd=Retrieve&amp;db=pubmed&amp;dopt=Abstract&amp;list_uids=27530187</a>  6 Hepatolo gy   Aug 2016 JOURNAL ARTICLE                                             |
| angptl1   | ephb2   | <a href="http://www.ncbi.nlm.nih.gov/entrez/query.fcgi?cmd=Retrieve&amp;db=pubmed&amp;dopt=Abstract&amp;list_uids=27530187">http://www.ncbi.nlm.nih.gov/entrez/query.fcgi?cmd=Retrieve&amp;db=pubmed&amp;dopt=Abstract&amp;list_uids=27530187</a>  6 Hepatolo gy   Aug 2016 JOURNAL ARTICLE                                             |
| angptl1   | met     | <a href="http://www.ncbi.nlm.nih.gov/entrez/query.fcgi?cmd=Retrieve&amp;db=pubmed&amp;dopt=Abstract&amp;list_uids=27530187">http://www.ncbi.nlm.nih.gov/entrez/query.fcgi?cmd=Retrieve&amp;db=pubmed&amp;dopt=Abstract&amp;list_uids=27530187</a>  6 Hepatolo gy   Aug 2016 JOURNAL ARTICLE                                             |
| eya1      | bcl2    | <a href="http://www.ncbi.nlm.nih.gov/entrez/query.fcgi?cmd=Retrieve&amp;db=pubmed&amp;dopt=Abstract&amp;list_uids=27531778">http://www.ncbi.nlm.nih.gov/entrez/query.fcgi?cmd=Retrieve&amp;db=pubmed&amp;dopt=Abstract&amp;list_uids=27531778</a>  6 Zhonggu o Shi Yan Xue Ye Xue Za Zhi 24 4 Aug 2016 English Abstract,Journal Article |
| kcnn4     | tp53    | <a href="http://www.ncbi.nlm.nih.gov/entrez/query.fcgi?cmd=Retrieve&amp;db=pubmed&amp;dopt=Abstract&amp;list_uids=27531900">http://www.ncbi.nlm.nih.gov/entrez/query.fcgi?cmd=Retrieve&amp;db=pubmed&amp;dopt=Abstract&amp;list_uids=27531900</a>  6 Oncotarg et   Aug 2016 JOURNAL ARTICLE                                             |
| dyrk2     | tyr     | <a href="http://www.ncbi.nlm.nih.gov/entrez/query.fcgi?cmd=Retrieve&amp;db=pubmed&amp;dopt=Abstract&amp;list_uids=27532268">http://www.ncbi.nlm.nih.gov/entrez/query.fcgi?cmd=Retrieve&amp;db=pubmed&amp;dopt=Abstract&amp;list_uids=27532268</a>  6 PLoS One 11 8  2016 Journal Article                                                |
| mirn146 b | irak1   | <a href="http://www.ncbi.nlm.nih.gov/entrez/query.fcgi?cmd=Retrieve&amp;db=pubmed&amp;dopt=Abstract&amp;list_uids=27533309">http://www.ncbi.nlm.nih.gov/entrez/query.fcgi?cmd=Retrieve&amp;db=pubmed&amp;dopt=Abstract&amp;list_uids=27533309</a>  6 J Clin Endocrinol Metab   Aug 2016 JOURNAL ARTICLE                                 |
| mirn146 b | f9      | <a href="http://www.ncbi.nlm.nih.gov/entrez/query.fcgi?cmd=Retrieve&amp;db=pubmed&amp;dopt=Abstract&amp;list_uids=27533309">http://www.ncbi.nlm.nih.gov/entrez/query.fcgi?cmd=Retrieve&amp;db=pubmed&amp;dopt=Abstract&amp;list_uids=27533309</a>  6 J Clin Endocrinol Metab   Aug 2016 JOURNAL ARTICLE                                 |
| f9        | irak1   | <a href="http://www.ncbi.nlm.nih.gov/entrez/query.fcgi?cmd=Retrieve&amp;db=pubmed&amp;dopt=Abstract&amp;list_uids=27533309">http://www.ncbi.nlm.nih.gov/entrez/query.fcgi?cmd=Retrieve&amp;db=pubmed&amp;dopt=Abstract&amp;list_uids=27533309</a>  6 J Clin Endocrinol Metab   Aug 2016 JOURNAL ARTICLE                                 |
| gli1      | itk     | <a href="http://www.ncbi.nlm.nih.gov/entrez/query.fcgi?cmd=Retrieve&amp;db=pubmed&amp;dopt=Abstract&amp;list_uids=27533453">http://www.ncbi.nlm.nih.gov/entrez/query.fcgi?cmd=Retrieve&amp;db=pubmed&amp;dopt=Abstract&amp;list_uids=27533453</a>  6 Oncotarg et   Aug 2016 JOURNAL ARTICLE                                             |
| smo       | gli1    | <a href="http://www.ncbi.nlm.nih.gov/entrez/query.fcgi?cmd=Retrieve&amp;db=pubmed&amp;dopt=Abstract&amp;list_uids=27533453">http://www.ncbi.nlm.nih.gov/entrez/query.fcgi?cmd=Retrieve&amp;db=pubmed&amp;dopt=Abstract&amp;list_uids=27533453</a>  6 Oncotarg et   Aug 2016 JOURNAL ARTICLE                                             |



|        |         |                                                                                                                                                                                                                                                                                              |
|--------|---------|----------------------------------------------------------------------------------------------------------------------------------------------------------------------------------------------------------------------------------------------------------------------------------------------|
| shh    | gli1    | <a href="http://www.ncbi.nlm.nih.gov/entrez/query.fcgi?cmd=Retrieve&amp;db=pubmed&amp;dopt=Abstract&amp;list_uids=27533453">http://www.ncbi.nlm.nih.gov/entrez/query.fcgi?cmd=Retrieve&amp;db=pubmed&amp;dopt=Abstract&amp;list_uids=27533453</a>  6 Oncotarget  Aug 2016 JOURNAL ARTICLE    |
| shh    | smo     | <a href="http://www.ncbi.nlm.nih.gov/entrez/query.fcgi?cmd=Retrieve&amp;db=pubmed&amp;dopt=Abstract&amp;list_uids=27533453">http://www.ncbi.nlm.nih.gov/entrez/query.fcgi?cmd=Retrieve&amp;db=pubmed&amp;dopt=Abstract&amp;list_uids=27533453</a>  6 Oncotarget  Aug 2016 JOURNAL ARTICLE    |
| alcam  | stat6   | <a href="http://www.ncbi.nlm.nih.gov/entrez/query.fcgi?cmd=Retrieve&amp;db=pubmed&amp;dopt=Abstract&amp;list_uids=27533463">http://www.ncbi.nlm.nih.gov/entrez/query.fcgi?cmd=Retrieve&amp;db=pubmed&amp;dopt=Abstract&amp;list_uids=27533463</a>  6 Oncotarget  Aug 2016 JOURNAL ARTICLE    |
| fut8   | hcc     | <a href="http://www.ncbi.nlm.nih.gov/entrez/query.fcgi?cmd=Retrieve&amp;db=pubmed&amp;dopt=Abstract&amp;list_uids=27533464">http://www.ncbi.nlm.nih.gov/entrez/query.fcgi?cmd=Retrieve&amp;db=pubmed&amp;dopt=Abstract&amp;list_uids=27533464</a>  6 Oncotarget  Aug 2016 JOURNAL ARTICLE    |
| spry1  | rela    | <a href="http://www.ncbi.nlm.nih.gov/entrez/query.fcgi?cmd=Retrieve&amp;db=pubmed&amp;dopt=Abstract&amp;list_uids=27533779">http://www.ncbi.nlm.nih.gov/entrez/query.fcgi?cmd=Retrieve&amp;db=pubmed&amp;dopt=Abstract&amp;list_uids=27533779</a>  6 Mol Carcinog  Aug 2016 JOURNAL ARTICLE  |
| spry1  | eif2ak3 | <a href="http://www.ncbi.nlm.nih.gov/entrez/query.fcgi?cmd=Retrieve&amp;db=pubmed&amp;dopt=Abstract&amp;list_uids=27533779">http://www.ncbi.nlm.nih.gov/entrez/query.fcgi?cmd=Retrieve&amp;db=pubmed&amp;dopt=Abstract&amp;list_uids=27533779</a>  6 Mol Carcinog  Aug 2016 JOURNAL ARTICLE  |
| spry1  | ephb2   | <a href="http://www.ncbi.nlm.nih.gov/entrez/query.fcgi?cmd=Retrieve&amp;db=pubmed&amp;dopt=Abstract&amp;list_uids=27533779">http://www.ncbi.nlm.nih.gov/entrez/query.fcgi?cmd=Retrieve&amp;db=pubmed&amp;dopt=Abstract&amp;list_uids=27533779</a>  6 Mol Carcinog  Aug 2016 JOURNAL ARTICLE  |
| spry1  | pten    | <a href="http://www.ncbi.nlm.nih.gov/entrez/query.fcgi?cmd=Retrieve&amp;db=pubmed&amp;dopt=Abstract&amp;list_uids=27533779">http://www.ncbi.nlm.nih.gov/entrez/query.fcgi?cmd=Retrieve&amp;db=pubmed&amp;dopt=Abstract&amp;list_uids=27533779</a>  6 Mol Carcinog  Aug 2016 JOURNAL ARTICLE  |
| spry1  | pdc4    | <a href="http://www.ncbi.nlm.nih.gov/entrez/query.fcgi?cmd=Retrieve&amp;db=pubmed&amp;dopt=Abstract&amp;list_uids=27533779">http://www.ncbi.nlm.nih.gov/entrez/query.fcgi?cmd=Retrieve&amp;db=pubmed&amp;dopt=Abstract&amp;list_uids=27533779</a>  6 Mol Carcinog  Aug 2016 JOURNAL ARTICLE  |
| mirn21 | rela    | <a href="http://www.ncbi.nlm.nih.gov/entrez/query.fcgi?cmd=Retrieve&amp;db=pubmed&amp;dopt=Abstract&amp;list_uids=27533779">http://www.ncbi.nlm.nih.gov/entrez/query.fcgi?cmd=Retrieve&amp;db=pubmed&amp;dopt=Abstract&amp;list_uids=27533779</a>  6 Mol Carcinog  Aug 2016 JOURNAL ARTICLE  |
| mirn21 | eif2ak3 | <a href="http://www.ncbi.nlm.nih.gov/entrez/query.fcgi?cmd=Retrieve&amp;db=pubmed&amp;dopt=Abstract&amp;list_uids=27533779">http://www.ncbi.nlm.nih.gov/entrez/query.fcgi?cmd=Retrieve&amp;db=pubmed&amp;dopt=Abstract&amp;list_uids=27533779</a>  6 Mol Carcinog  Aug 2016 JOURNAL ARTICLE  |
| mirn21 | ephb2   | <a href="http://www.ncbi.nlm.nih.gov/entrez/query.fcgi?cmd=Retrieve&amp;db=pubmed&amp;dopt=Abstract&amp;list_uids=27533779">http://www.ncbi.nlm.nih.gov/entrez/query.fcgi?cmd=Retrieve&amp;db=pubmed&amp;dopt=Abstract&amp;list_uids=27533779</a>  6 Mol Carcinog  Aug 2016 JOURNAL ARTICLE  |
| mirn21 | spry1   | <a href="http://www.ncbi.nlm.nih.gov/entrez/query.fcgi?cmd=Retrieve&amp;db=pubmed&amp;dopt=Abstract&amp;list_uids=27533779">http://www.ncbi.nlm.nih.gov/entrez/query.fcgi?cmd=Retrieve&amp;db=pubmed&amp;dopt=Abstract&amp;list_uids=27533779</a>  6 Mol Carcinog  Aug 2016 JOURNAL ARTICLE  |
| mirn21 | mmp9    | <a href="http://www.ncbi.nlm.nih.gov/entrez/query.fcgi?cmd=Retrieve&amp;db=pubmed&amp;dopt=Abstract&amp;list_uids=27600360">http://www.ncbi.nlm.nih.gov/entrez/query.fcgi?cmd=Retrieve&amp;db=pubmed&amp;dopt=Abstract&amp;list_uids=27600360</a>  6 Cell Biol Int  Sep 2016 JOURNAL ARTICLE |
| mirn21 | mmp2    | <a href="http://www.ncbi.nlm.nih.gov/entrez/query.fcgi?cmd=Retrieve&amp;db=pubmed&amp;dopt=Abstract&amp;list_uids=27600360">http://www.ncbi.nlm.nih.gov/entrez/query.fcgi?cmd=Retrieve&amp;db=pubmed&amp;dopt=Abstract&amp;list_uids=27600360</a>  6 Cell Biol Int  Sep 2016 JOURNAL ARTICLE |
| mirn21 | bcl2    | <a href="http://www.ncbi.nlm.nih.gov/entrez/query.fcgi?cmd=Retrieve&amp;db=pubmed&amp;dopt=Abstract&amp;list_uids=27600360">http://www.ncbi.nlm.nih.gov/entrez/query.fcgi?cmd=Retrieve&amp;db=pubmed&amp;dopt=Abstract&amp;list_uids=27600360</a>  6 Cell Biol Int  Sep 2016 JOURNAL ARTICLE |
| mirn21 | bax     | <a href="http://www.ncbi.nlm.nih.gov/entrez/query.fcgi?cmd=Retrieve&amp;db=pubmed&amp;dopt=Abstract&amp;list_uids=27600360">http://www.ncbi.nlm.nih.gov/entrez/query.fcgi?cmd=Retrieve&amp;db=pubmed&amp;dopt=Abstract&amp;list_uids=27600360</a>  6 Cell Biol Int  Sep 2016 JOURNAL ARTICLE |
| mirn21 | pdc4    | <a href="http://www.ncbi.nlm.nih.gov/entrez/query.fcgi?cmd=Retrieve&amp;db=pubmed&amp;dopt=Abstract&amp;list_uids=27600360">http://www.ncbi.nlm.nih.gov/entrez/query.fcgi?cmd=Retrieve&amp;db=pubmed&amp;dopt=Abstract&amp;list_uids=27600360</a>  6 Cell Biol Int  Sep 2016 JOURNAL         |

|         |        |                                                                                                                                                                                                                                                                                                                                                                                                                                                                                                                                                                                             |
|---------|--------|---------------------------------------------------------------------------------------------------------------------------------------------------------------------------------------------------------------------------------------------------------------------------------------------------------------------------------------------------------------------------------------------------------------------------------------------------------------------------------------------------------------------------------------------------------------------------------------------|
|         |        | ARTICLE  <a href="http://www.ncbi.nlm.nih.gov/entrez/query.fcgi?cmd=Retrieve&amp;db=pubmed&amp;dopt=Abstract&amp;list_uids=27533779">http://www.ncbi.nlm.nih.gov/entrez/query.fcgi?cmd=Retrieve&amp;db=pubmed&amp;dopt=Abstract&amp;list_uids=27533779</a>  6 Mol Carcinog   Aug 2016 JOURNAL ARTICLE                                                                                                                                                                                                                                                                                       |
| mirn21  | akt1   | <a href="http://www.ncbi.nlm.nih.gov/entrez/query.fcgi?cmd=Retrieve&amp;db=pubmed&amp;dopt=Abstract&amp;list_uids=27600360">http://www.ncbi.nlm.nih.gov/entrez/query.fcgi?cmd=Retrieve&amp;db=pubmed&amp;dopt=Abstract&amp;list_uids=27600360</a>  6 Cell Biol Int   Sep 2016 JOURNAL ARTICLE                                                                                                                                                                                                                                                                                               |
| mirn21  | pik3ca | <a href="http://www.ncbi.nlm.nih.gov/entrez/query.fcgi?cmd=Retrieve&amp;db=pubmed&amp;dopt=Abstract&amp;list_uids=27600360">http://www.ncbi.nlm.nih.gov/entrez/query.fcgi?cmd=Retrieve&amp;db=pubmed&amp;dopt=Abstract&amp;list_uids=27600360</a>  6 Cell Biol Int   Sep 2016 JOURNAL ARTICLE                                                                                                                                                                                                                                                                                               |
| mirn21  | pten   | <a href="http://www.ncbi.nlm.nih.gov/entrez/query.fcgi?cmd=Retrieve&amp;db=pubmed&amp;dopt=Abstract&amp;list_uids=27600360">http://www.ncbi.nlm.nih.gov/entrez/query.fcgi?cmd=Retrieve&amp;db=pubmed&amp;dopt=Abstract&amp;list_uids=27600360</a>  6 Cell Biol Int   Sep 2016 JOURNAL ARTICLE  <a href="http://www.ncbi.nlm.nih.gov/entrez/query.fcgi?cmd=Retrieve&amp;db=pubmed&amp;dopt=Abstract&amp;list_uids=27533779">http://www.ncbi.nlm.nih.gov/entrez/query.fcgi?cmd=Retrieve&amp;db=pubmed&amp;dopt=Abstract&amp;list_uids=27533779</a>  6 Mol Carcinog   Aug 2016 JOURNAL ARTICLE |
| nfatc2  | mdm2   | <a href="http://www.ncbi.nlm.nih.gov/entrez/query.fcgi?cmd=Retrieve&amp;db=pubmed&amp;dopt=Abstract&amp;list_uids=27533941">http://www.ncbi.nlm.nih.gov/entrez/query.fcgi?cmd=Retrieve&amp;db=pubmed&amp;dopt=Abstract&amp;list_uids=27533941</a>  6 J Biomed Res 30 4 Jul 2016 Journal Article                                                                                                                                                                                                                                                                                             |
| mirn144 | hcc    | <a href="http://www.ncbi.nlm.nih.gov/entrez/query.fcgi?cmd=Retrieve&amp;db=pubmed&amp;dopt=Abstract&amp;list_uids=27536132">http://www.ncbi.nlm.nih.gov/entrez/query.fcgi?cmd=Retrieve&amp;db=pubmed&amp;dopt=Abstract&amp;list_uids=27536132</a>  6 Onco Targets Ther 9   2016 Journal Article                                                                                                                                                                                                                                                                                             |
| fat     | vhl    | <a href="http://www.ncbi.nlm.nih.gov/entrez/query.fcgi?cmd=Retrieve&amp;db=pubmed&amp;dopt=Abstract&amp;list_uids=27536856">http://www.ncbi.nlm.nih.gov/entrez/query.fcgi?cmd=Retrieve&amp;db=pubmed&amp;dopt=Abstract&amp;list_uids=27536856</a>  6 Int J Cancer   Aug 2016 JOURNAL ARTICLE                                                                                                                                                                                                                                                                                                |
| mirn23a | st7l   | <a href="http://www.ncbi.nlm.nih.gov/entrez/query.fcgi?cmd=Retrieve&amp;db=pubmed&amp;dopt=Abstract&amp;list_uids=27537390">http://www.ncbi.nlm.nih.gov/entrez/query.fcgi?cmd=Retrieve&amp;db=pubmed&amp;dopt=Abstract&amp;list_uids=27537390</a>  6 Br J Cancer 115 6 Sep 2016 Journal Article                                                                                                                                                                                                                                                                                             |
| etv4    | erbb2  | <a href="http://www.ncbi.nlm.nih.gov/entrez/query.fcgi?cmd=Retrieve&amp;db=pubmed&amp;dopt=Abstract&amp;list_uids=27537398">http://www.ncbi.nlm.nih.gov/entrez/query.fcgi?cmd=Retrieve&amp;db=pubmed&amp;dopt=Abstract&amp;list_uids=27537398</a>  6 Anticancer Drugs   Aug 2016 JOURNAL ARTICLE                                                                                                                                                                                                                                                                                            |
| cmtm3   | pcsk1  | <a href="http://www.ncbi.nlm.nih.gov/entrez/query.fcgi?cmd=Retrieve&amp;db=pubmed&amp;dopt=Abstract&amp;list_uids=27538134">http://www.ncbi.nlm.nih.gov/entrez/query.fcgi?cmd=Retrieve&amp;db=pubmed&amp;dopt=Abstract&amp;list_uids=27538134</a>  6 Beijing Da Xue Xue Bao 48 1 Feb 2016 English Abstract,Journal Article                                                                                                                                                                                                                                                                  |
| cdk2    | ephb2  | <a href="http://www.ncbi.nlm.nih.gov/entrez/query.fcgi?cmd=Retrieve&amp;db=pubmed&amp;dopt=Abstract&amp;list_uids=27542217">http://www.ncbi.nlm.nih.gov/entrez/query.fcgi?cmd=Retrieve&amp;db=pubmed&amp;dopt=Abstract&amp;list_uids=27542217</a>  6 Oncotarget   Aug 2016 JOURNAL ARTICLE                                                                                                                                                                                                                                                                                                  |
| stk11   | atp8a2 | <a href="http://www.ncbi.nlm.nih.gov/entrez/query.fcgi?cmd=Retrieve&amp;db=pubmed&amp;dopt=Abstract&amp;list_uids=27546620">http://www.ncbi.nlm.nih.gov/entrez/query.fcgi?cmd=Retrieve&amp;db=pubmed&amp;dopt=Abstract&amp;list_uids=27546620</a>  6 Oncogene   Aug 2016 JOURNAL ARTICLE                                                                                                                                                                                                                                                                                                    |
| sdhd    | tlr2   | <a href="http://www.ncbi.nlm.nih.gov/entrez/query.fcgi?cmd=Retrieve&amp;db=pubmed&amp;dopt=Abstract&amp;list_uids=27548027">http://www.ncbi.nlm.nih.gov/entrez/query.fcgi?cmd=Retrieve&amp;db=pubmed&amp;dopt=Abstract&amp;list_uids=27548027</a>  6 ACS Chem Biol   Sep 2016 JOURNAL ARTICLE                                                                                                                                                                                                                                                                                               |
| pgls    | tlr2   | <a href="http://www.ncbi.nlm.nih.gov/entrez/query.fcgi?cmd=Retrieve&amp;db=pubmed&amp;dopt=Abstract&amp;list_uids=27548027">http://www.ncbi.nlm.nih.gov/entrez/query.fcgi?cmd=Retrieve&amp;db=pubmed&amp;dopt=Abstract&amp;list_uids=27548027</a>  6 ACS Chem Biol   Sep 2016 JOURNAL ARTICLE                                                                                                                                                                                                                                                                                               |
| cdkn1c  | rbp2   | <a href="http://www.ncbi.nlm.nih.gov/entrez/query.fcgi?cmd=Retrieve&amp;db=pubmed&amp;dopt=Abstract&amp;list_uids=27548814">http://www.ncbi.nlm.nih.gov/entrez/query.fcgi?cmd=Retrieve&amp;db=pubmed&amp;dopt=Abstract&amp;list_uids=27548814</a>  6 Oncogene 5 8  2016 Journal Article                                                                                                                                                                                                                                                                                                     |
| cox7a2l | cox8a  | <a href="http://www.ncbi.nlm.nih.gov/entrez/query.fcgi?cmd=Retrieve&amp;db=pubmed&amp;dopt=Abstract&amp;list_uids=27550821">http://www.ncbi.nlm.nih.gov/entrez/query.fcgi?cmd=Retrieve&amp;db=pubmed&amp;dopt=Abstract&amp;list_uids=27550821</a>  6 Sci Rep 6   2016 Journal Article                                                                                                                                                                                                                                                                                                       |
| bap1    | lct    | <a href="http://www.ncbi.nlm.nih.gov/entrez/query.fcgi?cmd=Retrieve&amp;db=pubmed&amp;dopt=Abstract&amp;list_uids=27553041">http://www.ncbi.nlm.nih.gov/entrez/query.fcgi?cmd=Retrieve&amp;db=pubmed&amp;dopt=Abstract&amp;list_uids=27553041</a>  6 BMC Cancer 16 1  2016 Journal Article                                                                                                                                                                                                                                                                                                  |

|            |           |                                                                                                                                                                                                                                                                                                      |
|------------|-----------|------------------------------------------------------------------------------------------------------------------------------------------------------------------------------------------------------------------------------------------------------------------------------------------------------|
| tbx3       | itk       | <a href="http://www.ncbi.nlm.nih.gov/entrez/query.fcgi?cmd=Retrieve&amp;db=pubmed&amp;dopt=Abstract&amp;list_uids=27553355">http://www.ncbi.nlm.nih.gov/entrez/query.fcgi?cmd=Retrieve&amp;db=pubmed&amp;dopt=Abstract&amp;list_uids=27553355</a>  6 Virchows Arch   Aug 2016 JOURNAL ARTICLE        |
| bcs1l      | erbb2     | <a href="http://www.ncbi.nlm.nih.gov/entrez/query.fcgi?cmd=Retrieve&amp;db=pubmed&amp;dopt=Abstract&amp;list_uids=27553713">http://www.ncbi.nlm.nih.gov/entrez/query.fcgi?cmd=Retrieve&amp;db=pubmed&amp;dopt=Abstract&amp;list_uids=27553713</a>  6 Int J Cancer   Aug 2016 REVIEW, JOURNAL ARTICLE |
| ephb4      | icam1     | <a href="http://www.ncbi.nlm.nih.gov/entrez/query.fcgi?cmd=Retrieve&amp;db=pubmed&amp;dopt=Abstract&amp;list_uids=27553867">http://www.ncbi.nlm.nih.gov/entrez/query.fcgi?cmd=Retrieve&amp;db=pubmed&amp;dopt=Abstract&amp;list_uids=27553867</a>  6 Am J Reprod Immunol   Aug 2016 JOURNAL ARTICLE  |
| ephb4      | stat1     | <a href="http://www.ncbi.nlm.nih.gov/entrez/query.fcgi?cmd=Retrieve&amp;db=pubmed&amp;dopt=Abstract&amp;list_uids=27553867">http://www.ncbi.nlm.nih.gov/entrez/query.fcgi?cmd=Retrieve&amp;db=pubmed&amp;dopt=Abstract&amp;list_uids=27553867</a>  6 Am J Reprod Immunol   Aug 2016 JOURNAL ARTICLE  |
| epha1      | ephb4     | <a href="http://www.ncbi.nlm.nih.gov/entrez/query.fcgi?cmd=Retrieve&amp;db=pubmed&amp;dopt=Abstract&amp;list_uids=27553867">http://www.ncbi.nlm.nih.gov/entrez/query.fcgi?cmd=Retrieve&amp;db=pubmed&amp;dopt=Abstract&amp;list_uids=27553867</a>  6 Am J Reprod Immunol   Aug 2016 JOURNAL ARTICLE  |
| dbp        | tnfsf13   | <a href="http://www.ncbi.nlm.nih.gov/entrez/query.fcgi?cmd=Retrieve&amp;db=pubmed&amp;dopt=Abstract&amp;list_uids=27555313">http://www.ncbi.nlm.nih.gov/entrez/query.fcgi?cmd=Retrieve&amp;db=pubmed&amp;dopt=Abstract&amp;list_uids=27555313</a>  6 MBio 7 4 2016 Journal Article                   |
| dbp        | darc      | <a href="http://www.ncbi.nlm.nih.gov/entrez/query.fcgi?cmd=Retrieve&amp;db=pubmed&amp;dopt=Abstract&amp;list_uids=27555313">http://www.ncbi.nlm.nih.gov/entrez/query.fcgi?cmd=Retrieve&amp;db=pubmed&amp;dopt=Abstract&amp;list_uids=27555313</a>  6 MBio 7 4 2016 Journal Article                   |
| ebna1bp2   | darc      | <a href="http://www.ncbi.nlm.nih.gov/entrez/query.fcgi?cmd=Retrieve&amp;db=pubmed&amp;dopt=Abstract&amp;list_uids=27555313">http://www.ncbi.nlm.nih.gov/entrez/query.fcgi?cmd=Retrieve&amp;db=pubmed&amp;dopt=Abstract&amp;list_uids=27555313</a>  6 MBio 7 4 2016 Journal Article                   |
| ebna1bp2   | tfrc      | <a href="http://www.ncbi.nlm.nih.gov/entrez/query.fcgi?cmd=Retrieve&amp;db=pubmed&amp;dopt=Abstract&amp;list_uids=27555313">http://www.ncbi.nlm.nih.gov/entrez/query.fcgi?cmd=Retrieve&amp;db=pubmed&amp;dopt=Abstract&amp;list_uids=27555313</a>  6 MBio 7 4 2016 Journal Article                   |
| ebna1bp2   | tnfsf13   | <a href="http://www.ncbi.nlm.nih.gov/entrez/query.fcgi?cmd=Retrieve&amp;db=pubmed&amp;dopt=Abstract&amp;list_uids=27555313">http://www.ncbi.nlm.nih.gov/entrez/query.fcgi?cmd=Retrieve&amp;db=pubmed&amp;dopt=Abstract&amp;list_uids=27555313</a>  6 MBio 7 4 2016 Journal Article                   |
| ebna1bp2   | dbp       | <a href="http://www.ncbi.nlm.nih.gov/entrez/query.fcgi?cmd=Retrieve&amp;db=pubmed&amp;dopt=Abstract&amp;list_uids=27555313">http://www.ncbi.nlm.nih.gov/entrez/query.fcgi?cmd=Retrieve&amp;db=pubmed&amp;dopt=Abstract&amp;list_uids=27555313</a>  6 MBio 7 4 2016 Journal Article                   |
| icam2      | ephb2     | <a href="http://www.ncbi.nlm.nih.gov/entrez/query.fcgi?cmd=Retrieve&amp;db=pubmed&amp;dopt=Abstract&amp;list_uids=27556181">http://www.ncbi.nlm.nih.gov/entrez/query.fcgi?cmd=Retrieve&amp;db=pubmed&amp;dopt=Abstract&amp;list_uids=27556181</a>  6 Oncotarget   Aug 2016 JOURNAL ARTICLE           |
| icam2      | tp53      | <a href="http://www.ncbi.nlm.nih.gov/entrez/query.fcgi?cmd=Retrieve&amp;db=pubmed&amp;dopt=Abstract&amp;list_uids=27556181">http://www.ncbi.nlm.nih.gov/entrez/query.fcgi?cmd=Retrieve&amp;db=pubmed&amp;dopt=Abstract&amp;list_uids=27556181</a>  6 Oncotarget   Aug 2016 JOURNAL ARTICLE           |
| ets2       | frap1     | <a href="http://www.ncbi.nlm.nih.gov/entrez/query.fcgi?cmd=Retrieve&amp;db=pubmed&amp;dopt=Abstract&amp;list_uids=27556183">http://www.ncbi.nlm.nih.gov/entrez/query.fcgi?cmd=Retrieve&amp;db=pubmed&amp;dopt=Abstract&amp;list_uids=27556183</a>  6 Oncotarget   Aug 2016 JOURNAL ARTICLE           |
| ncrna00084 | gsc       | <a href="http://www.ncbi.nlm.nih.gov/entrez/query.fcgi?cmd=Retrieve&amp;db=pubmed&amp;dopt=Abstract&amp;list_uids=27556696">http://www.ncbi.nlm.nih.gov/entrez/query.fcgi?cmd=Retrieve&amp;db=pubmed&amp;dopt=Abstract&amp;list_uids=27556696</a>  6 Oncotarget   Aug 2016 JOURNAL ARTICLE           |
| ncrna00084 | mirnlet7e | <a href="http://www.ncbi.nlm.nih.gov/entrez/query.fcgi?cmd=Retrieve&amp;db=pubmed&amp;dopt=Abstract&amp;list_uids=27556696">http://www.ncbi.nlm.nih.gov/entrez/query.fcgi?cmd=Retrieve&amp;db=pubmed&amp;dopt=Abstract&amp;list_uids=27556696</a>  6 Oncotarget   Aug 2016 JOURNAL ARTICLE           |
| tnfaip8l2  | vegfa     | <a href="http://www.ncbi.nlm.nih.gov/entrez/query.fcgi?cmd=Retrieve&amp;db=pubmed&amp;dopt=Abstract&amp;list_uids=27556698">http://www.ncbi.nlm.nih.gov/entrez/query.fcgi?cmd=Retrieve&amp;db=pubmed&amp;dopt=Abstract&amp;list_uids=27556698</a>  6 Oncotarget   Aug 2016 JOURNAL ARTICLE           |
| tnfaip8l2  | rac1      | <a href="http://www.ncbi.nlm.nih.gov/entrez/query.fcgi?cmd=Retrieve&amp;db=pubmed&amp;dopt=Abstract&amp;list_uids=27556698">http://www.ncbi.nlm.nih.gov/entrez/query.fcgi?cmd=Retrieve&amp;db=pubmed&amp;dopt=Abstract&amp;list_uids=27556698</a>  6 Oncotarget   Aug 2016 JOURNAL ARTICLE           |

|        |          |                                                                                                                                                                                                                                                                                                          |
|--------|----------|----------------------------------------------------------------------------------------------------------------------------------------------------------------------------------------------------------------------------------------------------------------------------------------------------------|
| rhoh   | mmp9     | <a href="http://www.ncbi.nlm.nih.gov/entrez/query.fcgi?cmd=Retrieve&amp;db=pubmed&amp;dopt=Abstract&amp;list_uids=27556699">http://www.ncbi.nlm.nih.gov/entrez/query.fcgi?cmd=Retrieve&amp;db=pubmed&amp;dopt=Abstract&amp;list_uids=27556699</a>  6 Oncotarget  Aug 2016 JOURNAL ARTICLE                |
| 6-Sep  | ephb2    | <a href="http://www.ncbi.nlm.nih.gov/entrez/query.fcgi?cmd=Retrieve&amp;db=pubmed&amp;dopt=Abstract&amp;list_uids=27557506">http://www.ncbi.nlm.nih.gov/entrez/query.fcgi?cmd=Retrieve&amp;db=pubmed&amp;dopt=Abstract&amp;list_uids=27557506</a>  6 Oncotarget  Aug 2016 JOURNAL ARTICLE                |
| cdk5   | ervk2    | <a href="http://www.ncbi.nlm.nih.gov/entrez/query.fcgi?cmd=Retrieve&amp;db=pubmed&amp;dopt=Abstract&amp;list_uids=27557521">http://www.ncbi.nlm.nih.gov/entrez/query.fcgi?cmd=Retrieve&amp;db=pubmed&amp;dopt=Abstract&amp;list_uids=27557521</a>  6 Oncotarget  Aug 2016 JOURNAL ARTICLE                |
| cdk5   | tp53     | <a href="http://www.ncbi.nlm.nih.gov/entrez/query.fcgi?cmd=Retrieve&amp;db=pubmed&amp;dopt=Abstract&amp;list_uids=27557521">http://www.ncbi.nlm.nih.gov/entrez/query.fcgi?cmd=Retrieve&amp;db=pubmed&amp;dopt=Abstract&amp;list_uids=27557521</a>  6 Oncotarget  Aug 2016 JOURNAL ARTICLE                |
| max    | myc      | <a href="http://www.ncbi.nlm.nih.gov/entrez/query.fcgi?cmd=Retrieve&amp;db=pubmed&amp;dopt=Abstract&amp;list_uids=27557535">http://www.ncbi.nlm.nih.gov/entrez/query.fcgi?cmd=Retrieve&amp;db=pubmed&amp;dopt=Abstract&amp;list_uids=27557535</a>  6 Recent Results Cancer Res 207  2016 Journal Article |
| adsl   | defb103a | <a href="http://www.ncbi.nlm.nih.gov/entrez/query.fcgi?cmd=Retrieve&amp;db=pubmed&amp;dopt=Abstract&amp;list_uids=27558278">http://www.ncbi.nlm.nih.gov/entrez/query.fcgi?cmd=Retrieve&amp;db=pubmed&amp;dopt=Abstract&amp;list_uids=27558278</a>  6 J Periodontal Res  Aug 2016 JOURNAL ARTICLE         |
| adsl   | il6      | <a href="http://www.ncbi.nlm.nih.gov/entrez/query.fcgi?cmd=Retrieve&amp;db=pubmed&amp;dopt=Abstract&amp;list_uids=27558278">http://www.ncbi.nlm.nih.gov/entrez/query.fcgi?cmd=Retrieve&amp;db=pubmed&amp;dopt=Abstract&amp;list_uids=27558278</a>  6 J Periodontal Res  Aug 2016 JOURNAL ARTICLE         |
| adsl   | il8      | <a href="http://www.ncbi.nlm.nih.gov/entrez/query.fcgi?cmd=Retrieve&amp;db=pubmed&amp;dopt=Abstract&amp;list_uids=27558278">http://www.ncbi.nlm.nih.gov/entrez/query.fcgi?cmd=Retrieve&amp;db=pubmed&amp;dopt=Abstract&amp;list_uids=27558278</a>  6 J Periodontal Res  Aug 2016 JOURNAL ARTICLE         |
| adsl   | ccl20    | <a href="http://www.ncbi.nlm.nih.gov/entrez/query.fcgi?cmd=Retrieve&amp;db=pubmed&amp;dopt=Abstract&amp;list_uids=27558278">http://www.ncbi.nlm.nih.gov/entrez/query.fcgi?cmd=Retrieve&amp;db=pubmed&amp;dopt=Abstract&amp;list_uids=27558278</a>  6 J Periodontal Res  Aug 2016 JOURNAL ARTICLE         |
| adsl   | tnfsf13  | <a href="http://www.ncbi.nlm.nih.gov/entrez/query.fcgi?cmd=Retrieve&amp;db=pubmed&amp;dopt=Abstract&amp;list_uids=27558278">http://www.ncbi.nlm.nih.gov/entrez/query.fcgi?cmd=Retrieve&amp;db=pubmed&amp;dopt=Abstract&amp;list_uids=27558278</a>  6 J Periodontal Res  Aug 2016 JOURNAL ARTICLE         |
| adsl   | il8ra    | <a href="http://www.ncbi.nlm.nih.gov/entrez/query.fcgi?cmd=Retrieve&amp;db=pubmed&amp;dopt=Abstract&amp;list_uids=27558278">http://www.ncbi.nlm.nih.gov/entrez/query.fcgi?cmd=Retrieve&amp;db=pubmed&amp;dopt=Abstract&amp;list_uids=27558278</a>  6 J Periodontal Res  Aug 2016 JOURNAL ARTICLE         |
| adsl   | cxcl11   | <a href="http://www.ncbi.nlm.nih.gov/entrez/query.fcgi?cmd=Retrieve&amp;db=pubmed&amp;dopt=Abstract&amp;list_uids=27558278">http://www.ncbi.nlm.nih.gov/entrez/query.fcgi?cmd=Retrieve&amp;db=pubmed&amp;dopt=Abstract&amp;list_uids=27558278</a>  6 J Periodontal Res  Aug 2016 JOURNAL ARTICLE         |
| ccl20  | il6      | <a href="http://www.ncbi.nlm.nih.gov/entrez/query.fcgi?cmd=Retrieve&amp;db=pubmed&amp;dopt=Abstract&amp;list_uids=27558278">http://www.ncbi.nlm.nih.gov/entrez/query.fcgi?cmd=Retrieve&amp;db=pubmed&amp;dopt=Abstract&amp;list_uids=27558278</a>  6 J Periodontal Res  Aug 2016 JOURNAL ARTICLE         |
| ccl20  | il8      | <a href="http://www.ncbi.nlm.nih.gov/entrez/query.fcgi?cmd=Retrieve&amp;db=pubmed&amp;dopt=Abstract&amp;list_uids=27558278">http://www.ncbi.nlm.nih.gov/entrez/query.fcgi?cmd=Retrieve&amp;db=pubmed&amp;dopt=Abstract&amp;list_uids=27558278</a>  6 J Periodontal Res  Aug 2016 JOURNAL ARTICLE         |
| cxcl11 | il6      | <a href="http://www.ncbi.nlm.nih.gov/entrez/query.fcgi?cmd=Retrieve&amp;db=pubmed&amp;dopt=Abstract&amp;list_uids=27558278">http://www.ncbi.nlm.nih.gov/entrez/query.fcgi?cmd=Retrieve&amp;db=pubmed&amp;dopt=Abstract&amp;list_uids=27558278</a>  6 J Periodontal Res  Aug 2016 JOURNAL ARTICLE         |
| cxcl11 | il8      | <a href="http://www.ncbi.nlm.nih.gov/entrez/query.fcgi?cmd=Retrieve&amp;db=pubmed&amp;dopt=Abstract&amp;list_uids=27558278">http://www.ncbi.nlm.nih.gov/entrez/query.fcgi?cmd=Retrieve&amp;db=pubmed&amp;dopt=Abstract&amp;list_uids=27558278</a>  6 J Periodontal Res  Aug 2016 JOURNAL ARTICLE         |
| cxcl11 | ccl20    | <a href="http://www.ncbi.nlm.nih.gov/entrez/query.fcgi?cmd=Retrieve&amp;db=pubmed&amp;dopt=Abstract&amp;list_uids=27558278">http://www.ncbi.nlm.nih.gov/entrez/query.fcgi?cmd=Retrieve&amp;db=pubmed&amp;dopt=Abstract&amp;list_uids=27558278</a>  6 J Periodontal Res  Aug 2016 JOURNAL ARTICLE         |
| cxcl11 | tnfsf13  | <a href="http://www.ncbi.nlm.nih.gov/entrez/query.fcgi?cmd=Retrieve&amp;db=pubmed&amp;dopt=Abstract&amp;list_uids=27558278">http://www.ncbi.nlm.nih.gov/entrez/query.fcgi?cmd=Retrieve&amp;db=pubmed&amp;dopt=Abstract&amp;list_uids=27558278</a>  6 J Periodontal Res  Aug 2016 JOURNAL ARTICLE         |

|         |        |                                                                                                                                                                                                                                                                                                        |
|---------|--------|--------------------------------------------------------------------------------------------------------------------------------------------------------------------------------------------------------------------------------------------------------------------------------------------------------|
| cxcl11  | il8ra  | <a href="http://www.ncbi.nlm.nih.gov/entrez/query.fcgi?cmd=Retrieve&amp;db=pubmed&amp;dopt=Abstract&amp;list_uids=27558278">http://www.ncbi.nlm.nih.gov/entrez/query.fcgi?cmd=Retrieve&amp;db=pubmed&amp;dopt=Abstract&amp;list_uids=27558278</a>  6 J Periodontal Res   Aug 2016 JOURNAL ARTICLE      |
| foxc2   | itk    | <a href="http://www.ncbi.nlm.nih.gov/entrez/query.fcgi?cmd=Retrieve&amp;db=pubmed&amp;dopt=Abstract&amp;list_uids=27562816">http://www.ncbi.nlm.nih.gov/entrez/query.fcgi?cmd=Retrieve&amp;db=pubmed&amp;dopt=Abstract&amp;list_uids=27562816</a>  6 Cell Physiol Biochem 39 3  2016 Journal Article   |
| nanogp8 | frap1  | <a href="http://www.ncbi.nlm.nih.gov/entrez/query.fcgi?cmd=Retrieve&amp;db=pubmed&amp;dopt=Abstract&amp;list_uids=27563247">http://www.ncbi.nlm.nih.gov/entrez/query.fcgi?cmd=Retrieve&amp;db=pubmed&amp;dopt=Abstract&amp;list_uids=27563247</a>  6 Onco Targets Ther 9   2016 Journal Article        |
| nanogp8 | akt1   | <a href="http://www.ncbi.nlm.nih.gov/entrez/query.fcgi?cmd=Retrieve&amp;db=pubmed&amp;dopt=Abstract&amp;list_uids=27563247">http://www.ncbi.nlm.nih.gov/entrez/query.fcgi?cmd=Retrieve&amp;db=pubmed&amp;dopt=Abstract&amp;list_uids=27563247</a>  6 Onco Targets Ther 9   2016 Journal Article        |
| malat1  | mirn22 | <a href="http://www.ncbi.nlm.nih.gov/entrez/query.fcgi?cmd=Retrieve&amp;db=pubmed&amp;dopt=Abstract&amp;list_uids=27564100">http://www.ncbi.nlm.nih.gov/entrez/query.fcgi?cmd=Retrieve&amp;db=pubmed&amp;dopt=Abstract&amp;list_uids=27564100</a>  6 Oncotarget   Aug 2016 JOURNAL ARTICLE             |
| malat1  | mapk8  | <a href="http://www.ncbi.nlm.nih.gov/entrez/query.fcgi?cmd=Retrieve&amp;db=pubmed&amp;dopt=Abstract&amp;list_uids=27565324">http://www.ncbi.nlm.nih.gov/entrez/query.fcgi?cmd=Retrieve&amp;db=pubmed&amp;dopt=Abstract&amp;list_uids=27565324</a>  6 Neoplasma  6 Aug 2016 JOURNAL ARTICLE             |
| malat1  | mapk14 | <a href="http://www.ncbi.nlm.nih.gov/entrez/query.fcgi?cmd=Retrieve&amp;db=pubmed&amp;dopt=Abstract&amp;list_uids=27565324">http://www.ncbi.nlm.nih.gov/entrez/query.fcgi?cmd=Retrieve&amp;db=pubmed&amp;dopt=Abstract&amp;list_uids=27565324</a>  6 Neoplasma  6 Aug 2016 JOURNAL ARTICLE             |
| malat1  | mapk3  | <a href="http://www.ncbi.nlm.nih.gov/entrez/query.fcgi?cmd=Retrieve&amp;db=pubmed&amp;dopt=Abstract&amp;list_uids=27565324">http://www.ncbi.nlm.nih.gov/entrez/query.fcgi?cmd=Retrieve&amp;db=pubmed&amp;dopt=Abstract&amp;list_uids=27565324</a>  6 Neoplasma  6 Aug 2016 JOURNAL ARTICLE             |
| malat1  | map2k1 | <a href="http://www.ncbi.nlm.nih.gov/entrez/query.fcgi?cmd=Retrieve&amp;db=pubmed&amp;dopt=Abstract&amp;list_uids=27565324">http://www.ncbi.nlm.nih.gov/entrez/query.fcgi?cmd=Retrieve&amp;db=pubmed&amp;dopt=Abstract&amp;list_uids=27565324</a>  6 Neoplasma  6 Aug 2016 JOURNAL ARTICLE             |
| malat1  | tgfb1  | <a href="http://www.ncbi.nlm.nih.gov/entrez/query.fcgi?cmd=Retrieve&amp;db=pubmed&amp;dopt=Abstract&amp;list_uids=27565324">http://www.ncbi.nlm.nih.gov/entrez/query.fcgi?cmd=Retrieve&amp;db=pubmed&amp;dopt=Abstract&amp;list_uids=27565324</a>  6 Neoplasma  6 Aug 2016 JOURNAL ARTICLE             |
| map2k1  | mapk8  | <a href="http://www.ncbi.nlm.nih.gov/entrez/query.fcgi?cmd=Retrieve&amp;db=pubmed&amp;dopt=Abstract&amp;list_uids=27565324">http://www.ncbi.nlm.nih.gov/entrez/query.fcgi?cmd=Retrieve&amp;db=pubmed&amp;dopt=Abstract&amp;list_uids=27565324</a>  6 Neoplasma  6 Aug 2016 JOURNAL ARTICLE             |
| map2k1  | jun    | <a href="http://www.ncbi.nlm.nih.gov/entrez/query.fcgi?cmd=Retrieve&amp;db=pubmed&amp;dopt=Abstract&amp;list_uids=27565324">http://www.ncbi.nlm.nih.gov/entrez/query.fcgi?cmd=Retrieve&amp;db=pubmed&amp;dopt=Abstract&amp;list_uids=27565324</a>  6 Neoplasma  6 Aug 2016 JOURNAL ARTICLE             |
| map2k1  | mapk14 | <a href="http://www.ncbi.nlm.nih.gov/entrez/query.fcgi?cmd=Retrieve&amp;db=pubmed&amp;dopt=Abstract&amp;list_uids=27565324">http://www.ncbi.nlm.nih.gov/entrez/query.fcgi?cmd=Retrieve&amp;db=pubmed&amp;dopt=Abstract&amp;list_uids=27565324</a>  6 Neoplasma  6 Aug 2016 JOURNAL ARTICLE             |
| map2k1  | mapk3  | <a href="http://www.ncbi.nlm.nih.gov/entrez/query.fcgi?cmd=Retrieve&amp;db=pubmed&amp;dopt=Abstract&amp;list_uids=27565324">http://www.ncbi.nlm.nih.gov/entrez/query.fcgi?cmd=Retrieve&amp;db=pubmed&amp;dopt=Abstract&amp;list_uids=27565324</a>  6 Neoplasma  6 Aug 2016 JOURNAL ARTICLE             |
| recql   | itk    | <a href="http://www.ncbi.nlm.nih.gov/entrez/query.fcgi?cmd=Retrieve&amp;db=pubmed&amp;dopt=Abstract&amp;list_uids=27565844">http://www.ncbi.nlm.nih.gov/entrez/query.fcgi?cmd=Retrieve&amp;db=pubmed&amp;dopt=Abstract&amp;list_uids=27565844</a>  6 Biomed Pharmacother 83   Aug 2016 JOURNAL ARTICLE |
| rhag    | mmp1   | <a href="http://www.ncbi.nlm.nih.gov/entrez/query.fcgi?cmd=Retrieve&amp;db=pubmed&amp;dopt=Abstract&amp;list_uids=27566200">http://www.ncbi.nlm.nih.gov/entrez/query.fcgi?cmd=Retrieve&amp;db=pubmed&amp;dopt=Abstract&amp;list_uids=27566200</a>  6 J Ethnopharmacol   Aug 2016 JOURNAL ARTICLE       |
| rhag    | stat3  | <a href="http://www.ncbi.nlm.nih.gov/entrez/query.fcgi?cmd=Retrieve&amp;db=pubmed&amp;dopt=Abstract&amp;list_uids=27566200">http://www.ncbi.nlm.nih.gov/entrez/query.fcgi?cmd=Retrieve&amp;db=pubmed&amp;dopt=Abstract&amp;list_uids=27566200</a>  6 J Ethnopharmacol   Aug 2016 JOURNAL ARTICLE       |
| rhag    | il6    | <a href="http://www.ncbi.nlm.nih.gov/entrez/query.fcgi?cmd=Retrieve&amp;db=pubmed&amp;dopt=Abstract&amp;list_uids=27566200">http://www.ncbi.nlm.nih.gov/entrez/query.fcgi?cmd=Retrieve&amp;db=pubmed&amp;dopt=Abstract&amp;list_uids=27566200</a>  6 J Ethnopharmacol   Aug 2016 JOURNAL ARTICLE       |

|        |        |                                                                                                                                                                                                                                                                                                      |
|--------|--------|------------------------------------------------------------------------------------------------------------------------------------------------------------------------------------------------------------------------------------------------------------------------------------------------------|
| dyrk1a | pten   | <a href="http://www.ncbi.nlm.nih.gov/entrez/query.fcgi?cmd=Retrieve&amp;db=pubmed&amp;dopt=Abstract&amp;list_uids=27569213">http://www.ncbi.nlm.nih.gov/entrez/query.fcgi?cmd=Retrieve&amp;db=pubmed&amp;dopt=Abstract&amp;list_uids=27569213</a>  6 Cancer Res   Aug 2016 JOURNAL ARTICLE           |
| tbx5   | pten   | <a href="http://www.ncbi.nlm.nih.gov/entrez/query.fcgi?cmd=Retrieve&amp;db=pubmed&amp;dopt=Abstract&amp;list_uids=27569213">http://www.ncbi.nlm.nih.gov/entrez/query.fcgi?cmd=Retrieve&amp;db=pubmed&amp;dopt=Abstract&amp;list_uids=27569213</a>  6 Cancer Res   Aug 2016 JOURNAL ARTICLE           |
| tbx5   | dyrk1a | <a href="http://www.ncbi.nlm.nih.gov/entrez/query.fcgi?cmd=Retrieve&amp;db=pubmed&amp;dopt=Abstract&amp;list_uids=27569213">http://www.ncbi.nlm.nih.gov/entrez/query.fcgi?cmd=Retrieve&amp;db=pubmed&amp;dopt=Abstract&amp;list_uids=27569213</a>  6 Cancer Res   Aug 2016 JOURNAL ARTICLE           |
| cd40   | akt1   | <a href="http://www.ncbi.nlm.nih.gov/entrez/query.fcgi?cmd=Retrieve&amp;db=pubmed&amp;dopt=Abstract&amp;list_uids=27569589">http://www.ncbi.nlm.nih.gov/entrez/query.fcgi?cmd=Retrieve&amp;db=pubmed&amp;dopt=Abstract&amp;list_uids=27569589</a>  6 Life Sci   Aug 2016 JOURNAL ARTICLE             |
| cd40   | pik3ca | <a href="http://www.ncbi.nlm.nih.gov/entrez/query.fcgi?cmd=Retrieve&amp;db=pubmed&amp;dopt=Abstract&amp;list_uids=27569589">http://www.ncbi.nlm.nih.gov/entrez/query.fcgi?cmd=Retrieve&amp;db=pubmed&amp;dopt=Abstract&amp;list_uids=27569589</a>  6 Life Sci   Aug 2016 JOURNAL ARTICLE             |
| nfkb1  | akt1   | <a href="http://www.ncbi.nlm.nih.gov/entrez/query.fcgi?cmd=Retrieve&amp;db=pubmed&amp;dopt=Abstract&amp;list_uids=27569589">http://www.ncbi.nlm.nih.gov/entrez/query.fcgi?cmd=Retrieve&amp;db=pubmed&amp;dopt=Abstract&amp;list_uids=27569589</a>  6 Life Sci   Aug 2016 JOURNAL ARTICLE             |
| nfkb1  | pik3ca | <a href="http://www.ncbi.nlm.nih.gov/entrez/query.fcgi?cmd=Retrieve&amp;db=pubmed&amp;dopt=Abstract&amp;list_uids=27569589">http://www.ncbi.nlm.nih.gov/entrez/query.fcgi?cmd=Retrieve&amp;db=pubmed&amp;dopt=Abstract&amp;list_uids=27569589</a>  6 Life Sci   Aug 2016 JOURNAL ARTICLE             |
| nfkb1  | cd40   | <a href="http://www.ncbi.nlm.nih.gov/entrez/query.fcgi?cmd=Retrieve&amp;db=pubmed&amp;dopt=Abstract&amp;list_uids=27569589">http://www.ncbi.nlm.nih.gov/entrez/query.fcgi?cmd=Retrieve&amp;db=pubmed&amp;dopt=Abstract&amp;list_uids=27569589</a>  6 Life Sci   Aug 2016 JOURNAL ARTICLE             |
| mt1jp  | phgdh  | <a href="http://www.ncbi.nlm.nih.gov/entrez/query.fcgi?cmd=Retrieve&amp;db=pubmed&amp;dopt=Abstract&amp;list_uids=27569900">http://www.ncbi.nlm.nih.gov/entrez/query.fcgi?cmd=Retrieve&amp;db=pubmed&amp;dopt=Abstract&amp;list_uids=27569900</a>  6 Biochim Biophys Acta   Aug 2016 JOURNAL ARTICLE |
| fbn2   | phgdh  | <a href="http://www.ncbi.nlm.nih.gov/entrez/query.fcgi?cmd=Retrieve&amp;db=pubmed&amp;dopt=Abstract&amp;list_uids=27593106">http://www.ncbi.nlm.nih.gov/entrez/query.fcgi?cmd=Retrieve&amp;db=pubmed&amp;dopt=Abstract&amp;list_uids=27593106</a>  6 J Hepatol   Sep 2016 JOURNAL ARTICLE            |
| xiap   | fbn2   | <a href="http://www.ncbi.nlm.nih.gov/entrez/query.fcgi?cmd=Retrieve&amp;db=pubmed&amp;dopt=Abstract&amp;list_uids=27571770">http://www.ncbi.nlm.nih.gov/entrez/query.fcgi?cmd=Retrieve&amp;db=pubmed&amp;dopt=Abstract&amp;list_uids=27571770</a>  6 Sci Rep 6   2016 Journal Article                |
| tacc3  | timp1  | <a href="http://www.ncbi.nlm.nih.gov/entrez/query.fcgi?cmd=Retrieve&amp;db=pubmed&amp;dopt=Abstract&amp;list_uids=27572091">http://www.ncbi.nlm.nih.gov/entrez/query.fcgi?cmd=Retrieve&amp;db=pubmed&amp;dopt=Abstract&amp;list_uids=27572091</a>  6 Mol Med Rep   Aug 2016 JOURNAL ARTICLE          |
| tacc3  | akt1   | <a href="http://www.ncbi.nlm.nih.gov/entrez/query.fcgi?cmd=Retrieve&amp;db=pubmed&amp;dopt=Abstract&amp;list_uids=27572091">http://www.ncbi.nlm.nih.gov/entrez/query.fcgi?cmd=Retrieve&amp;db=pubmed&amp;dopt=Abstract&amp;list_uids=27572091</a>  6 Mol Med Rep   Aug 2016 JOURNAL ARTICLE          |
| tacc3  | pik3ca | <a href="http://www.ncbi.nlm.nih.gov/entrez/query.fcgi?cmd=Retrieve&amp;db=pubmed&amp;dopt=Abstract&amp;list_uids=27572091">http://www.ncbi.nlm.nih.gov/entrez/query.fcgi?cmd=Retrieve&amp;db=pubmed&amp;dopt=Abstract&amp;list_uids=27572091</a>  6 Mol Med Rep   Aug 2016 JOURNAL ARTICLE          |
| zhx2   | ephb2  | <a href="http://www.ncbi.nlm.nih.gov/entrez/query.fcgi?cmd=Retrieve&amp;db=pubmed&amp;dopt=Abstract&amp;list_uids=27572273">http://www.ncbi.nlm.nih.gov/entrez/query.fcgi?cmd=Retrieve&amp;db=pubmed&amp;dopt=Abstract&amp;list_uids=27572273</a>  6 Int J Oncol 49 3 Sep 2016 Journal Article       |
| larp6  | ephb2  | <a href="http://www.ncbi.nlm.nih.gov/entrez/query.fcgi?cmd=Retrieve&amp;db=pubmed&amp;dopt=Abstract&amp;list_uids=27572273">http://www.ncbi.nlm.nih.gov/entrez/query.fcgi?cmd=Retrieve&amp;db=pubmed&amp;dopt=Abstract&amp;list_uids=27572273</a>  6 Int J Oncol 49 3 Sep 2016 Journal Article       |
| larp6  | zhx2   | <a href="http://www.ncbi.nlm.nih.gov/entrez/query.fcgi?cmd=Retrieve&amp;db=pubmed&amp;dopt=Abstract&amp;list_uids=27572273">http://www.ncbi.nlm.nih.gov/entrez/query.fcgi?cmd=Retrieve&amp;db=pubmed&amp;dopt=Abstract&amp;list_uids=27572273</a>  6 Int J Oncol 49 3 Sep 2016 Journal Article       |
| larp6  | akt1   | <a href="http://www.ncbi.nlm.nih.gov/entrez/query.fcgi?cmd=Retrieve&amp;db=pubmed&amp;dopt=Abstract&amp;list_uids=27572273">http://www.ncbi.nlm.nih.gov/entrez/query.fcgi?cmd=Retrieve&amp;db=pubmed&amp;dopt=Abstract&amp;list_uids=27572273</a>  6 Int J Oncol 49 3 Sep 2016 Journal Article       |

|         |         |                                                                                                                                                                                                                                                                                                |
|---------|---------|------------------------------------------------------------------------------------------------------------------------------------------------------------------------------------------------------------------------------------------------------------------------------------------------|
| larp6   | pik3ca  | <a href="http://www.ncbi.nlm.nih.gov/entrez/query.fcgi?cmd=Retrieve&amp;db=pubmed&amp;dopt=Abstract&amp;list_uids=27572273">http://www.ncbi.nlm.nih.gov/entrez/query.fcgi?cmd=Retrieve&amp;db=pubmed&amp;dopt=Abstract&amp;list_uids=27572273</a>  6 Int J Oncol 49 3 Sep 2016 Journal Article |
| larp6   | kdr     | <a href="http://www.ncbi.nlm.nih.gov/entrez/query.fcgi?cmd=Retrieve&amp;db=pubmed&amp;dopt=Abstract&amp;list_uids=27572273">http://www.ncbi.nlm.nih.gov/entrez/query.fcgi?cmd=Retrieve&amp;db=pubmed&amp;dopt=Abstract&amp;list_uids=27572273</a>  6 Int J Oncol 49 3 Sep 2016 Journal Article |
| mirn195 | ephb2   | <a href="http://www.ncbi.nlm.nih.gov/entrez/query.fcgi?cmd=Retrieve&amp;db=pubmed&amp;dopt=Abstract&amp;list_uids=27572273">http://www.ncbi.nlm.nih.gov/entrez/query.fcgi?cmd=Retrieve&amp;db=pubmed&amp;dopt=Abstract&amp;list_uids=27572273</a>  6 Int J Oncol 49 3 Sep 2016 Journal Article |
| mirn195 | zhx2    | <a href="http://www.ncbi.nlm.nih.gov/entrez/query.fcgi?cmd=Retrieve&amp;db=pubmed&amp;dopt=Abstract&amp;list_uids=27572273">http://www.ncbi.nlm.nih.gov/entrez/query.fcgi?cmd=Retrieve&amp;db=pubmed&amp;dopt=Abstract&amp;list_uids=27572273</a>  6 Int J Oncol 49 3 Sep 2016 Journal Article |
| mirn195 | akt1    | <a href="http://www.ncbi.nlm.nih.gov/entrez/query.fcgi?cmd=Retrieve&amp;db=pubmed&amp;dopt=Abstract&amp;list_uids=27572273">http://www.ncbi.nlm.nih.gov/entrez/query.fcgi?cmd=Retrieve&amp;db=pubmed&amp;dopt=Abstract&amp;list_uids=27572273</a>  6 Int J Oncol 49 3 Sep 2016 Journal Article |
| mirn195 | pik3ca  | <a href="http://www.ncbi.nlm.nih.gov/entrez/query.fcgi?cmd=Retrieve&amp;db=pubmed&amp;dopt=Abstract&amp;list_uids=27572273">http://www.ncbi.nlm.nih.gov/entrez/query.fcgi?cmd=Retrieve&amp;db=pubmed&amp;dopt=Abstract&amp;list_uids=27572273</a>  6 Int J Oncol 49 3 Sep 2016 Journal Article |
| mirn195 | kdr     | <a href="http://www.ncbi.nlm.nih.gov/entrez/query.fcgi?cmd=Retrieve&amp;db=pubmed&amp;dopt=Abstract&amp;list_uids=27572273">http://www.ncbi.nlm.nih.gov/entrez/query.fcgi?cmd=Retrieve&amp;db=pubmed&amp;dopt=Abstract&amp;list_uids=27572273</a>  6 Int J Oncol 49 3 Sep 2016 Journal Article |
| mirn195 | larp6   | <a href="http://www.ncbi.nlm.nih.gov/entrez/query.fcgi?cmd=Retrieve&amp;db=pubmed&amp;dopt=Abstract&amp;list_uids=27572273">http://www.ncbi.nlm.nih.gov/entrez/query.fcgi?cmd=Retrieve&amp;db=pubmed&amp;dopt=Abstract&amp;list_uids=27572273</a>  6 Int J Oncol 49 3 Sep 2016 Journal Article |
| mirn195 | smad7   | <a href="http://www.ncbi.nlm.nih.gov/entrez/query.fcgi?cmd=Retrieve&amp;db=pubmed&amp;dopt=Abstract&amp;list_uids=27574009">http://www.ncbi.nlm.nih.gov/entrez/query.fcgi?cmd=Retrieve&amp;db=pubmed&amp;dopt=Abstract&amp;list_uids=27574009</a>  6 Oncol Rep   Aug 2016 JOURNAL ARTICLE      |
| mirn195 | smad2   | <a href="http://www.ncbi.nlm.nih.gov/entrez/query.fcgi?cmd=Retrieve&amp;db=pubmed&amp;dopt=Abstract&amp;list_uids=27574009">http://www.ncbi.nlm.nih.gov/entrez/query.fcgi?cmd=Retrieve&amp;db=pubmed&amp;dopt=Abstract&amp;list_uids=27574009</a>  6 Oncol Rep   Aug 2016 JOURNAL ARTICLE      |
| setdb2  | me3     | <a href="http://www.ncbi.nlm.nih.gov/entrez/query.fcgi?cmd=Retrieve&amp;db=pubmed&amp;dopt=Abstract&amp;list_uids=27572307">http://www.ncbi.nlm.nih.gov/entrez/query.fcgi?cmd=Retrieve&amp;db=pubmed&amp;dopt=Abstract&amp;list_uids=27572307</a>  6 Oncotarget   Aug 2016 JOURNAL ARTICLE     |
| ceacam1 | bat2    | <a href="http://www.ncbi.nlm.nih.gov/entrez/query.fcgi?cmd=Retrieve&amp;db=pubmed&amp;dopt=Abstract&amp;list_uids=27572314">http://www.ncbi.nlm.nih.gov/entrez/query.fcgi?cmd=Retrieve&amp;db=pubmed&amp;dopt=Abstract&amp;list_uids=27572314</a>  6 Oncotarget   Aug 2016 JOURNAL ARTICLE     |
| ceacam1 | itk     | <a href="http://www.ncbi.nlm.nih.gov/entrez/query.fcgi?cmd=Retrieve&amp;db=pubmed&amp;dopt=Abstract&amp;list_uids=27572314">http://www.ncbi.nlm.nih.gov/entrez/query.fcgi?cmd=Retrieve&amp;db=pubmed&amp;dopt=Abstract&amp;list_uids=27572314</a>  6 Oncotarget   Aug 2016 JOURNAL ARTICLE     |
| gsn     | soat1   | <a href="http://www.ncbi.nlm.nih.gov/entrez/query.fcgi?cmd=Retrieve&amp;db=pubmed&amp;dopt=Abstract&amp;list_uids=27573444">http://www.ncbi.nlm.nih.gov/entrez/query.fcgi?cmd=Retrieve&amp;db=pubmed&amp;dopt=Abstract&amp;list_uids=27573444</a>  6 Mol Med Rep   Aug 2016 JOURNAL ARTICLE    |
| mirn23b | mirn27b | <a href="http://www.ncbi.nlm.nih.gov/entrez/query.fcgi?cmd=Retrieve&amp;db=pubmed&amp;dopt=Abstract&amp;list_uids=27573718">http://www.ncbi.nlm.nih.gov/entrez/query.fcgi?cmd=Retrieve&amp;db=pubmed&amp;dopt=Abstract&amp;list_uids=27573718</a>  6 Int J Oncol 49 3 Sep 2016 Journal Article |
| cdk6    | mmp9    | <a href="http://www.ncbi.nlm.nih.gov/entrez/query.fcgi?cmd=Retrieve&amp;db=pubmed&amp;dopt=Abstract&amp;list_uids=27573859">http://www.ncbi.nlm.nih.gov/entrez/query.fcgi?cmd=Retrieve&amp;db=pubmed&amp;dopt=Abstract&amp;list_uids=27573859</a>  6 Oncol Rep   Aug 2016 JOURNAL ARTICLE      |
| cdk6    | sp1     | <a href="http://www.ncbi.nlm.nih.gov/entrez/query.fcgi?cmd=Retrieve&amp;db=pubmed&amp;dopt=Abstract&amp;list_uids=27573859">http://www.ncbi.nlm.nih.gov/entrez/query.fcgi?cmd=Retrieve&amp;db=pubmed&amp;dopt=Abstract&amp;list_uids=27573859</a>  6 Oncol Rep   Aug 2016 JOURNAL ARTICLE      |
| cpi1    | spi1    | <a href="http://www.ncbi.nlm.nih.gov/entrez/query.fcgi?cmd=Retrieve&amp;db=pubmed&amp;dopt=Abstract&amp;list_uids=27573929">http://www.ncbi.nlm.nih.gov/entrez/query.fcgi?cmd=Retrieve&amp;db=pubmed&amp;dopt=Abstract&amp;list_uids=27573929</a>  6 Curr Pharm Des   Aug 2016 JOURNAL ARTICLE |

|         |          |                                                                                                                                                                                                                                                                                                 |
|---------|----------|-------------------------------------------------------------------------------------------------------------------------------------------------------------------------------------------------------------------------------------------------------------------------------------------------|
| sox1    | sall4    | <a href="http://www.ncbi.nlm.nih.gov/entrez/query.fcgi?cmd=Retrieve&amp;db=pubmed&amp;dopt=Abstract&amp;list_uids=27576349">http://www.ncbi.nlm.nih.gov/entrez/query.fcgi?cmd=Retrieve&amp;db=pubmed&amp;dopt=Abstract&amp;list_uids=27576349</a>  6 Gene  Aug 2016 JOURNAL ARTICLE             |
| angpt2  | frap1    | <a href="http://www.ncbi.nlm.nih.gov/entrez/query.fcgi?cmd=Retrieve&amp;db=pubmed&amp;dopt=Abstract&amp;list_uids=27577856">http://www.ncbi.nlm.nih.gov/entrez/query.fcgi?cmd=Retrieve&amp;db=pubmed&amp;dopt=Abstract&amp;list_uids=27577856</a>  6 J Pathol   Aug 2016 JOURNAL ARTICLE        |
| angpt2  | mirn100  | <a href="http://www.ncbi.nlm.nih.gov/entrez/query.fcgi?cmd=Retrieve&amp;db=pubmed&amp;dopt=Abstract&amp;list_uids=27577856">http://www.ncbi.nlm.nih.gov/entrez/query.fcgi?cmd=Retrieve&amp;db=pubmed&amp;dopt=Abstract&amp;list_uids=27577856</a>  6 J Pathol   Aug 2016 JOURNAL ARTICLE        |
| mirn100 | frap1    | <a href="http://www.ncbi.nlm.nih.gov/entrez/query.fcgi?cmd=Retrieve&amp;db=pubmed&amp;dopt=Abstract&amp;list_uids=27577856">http://www.ncbi.nlm.nih.gov/entrez/query.fcgi?cmd=Retrieve&amp;db=pubmed&amp;dopt=Abstract&amp;list_uids=27577856</a>  6 J Pathol   Aug 2016 JOURNAL ARTICLE        |
| rfxank  | mirn216a | <a href="http://www.ncbi.nlm.nih.gov/entrez/query.fcgi?cmd=Retrieve&amp;db=pubmed&amp;dopt=Abstract&amp;list_uids=27578985">http://www.ncbi.nlm.nih.gov/entrez/query.fcgi?cmd=Retrieve&amp;db=pubmed&amp;dopt=Abstract&amp;list_uids=27578985</a>  6 Onco Targets Ther 9   2016 Journal Article |
| rfxank  | akt1     | <a href="http://www.ncbi.nlm.nih.gov/entrez/query.fcgi?cmd=Retrieve&amp;db=pubmed&amp;dopt=Abstract&amp;list_uids=27578985">http://www.ncbi.nlm.nih.gov/entrez/query.fcgi?cmd=Retrieve&amp;db=pubmed&amp;dopt=Abstract&amp;list_uids=27578985</a>  6 Onco Targets Ther 9   2016 Journal Article |
| rfxank  | pik3ca   | <a href="http://www.ncbi.nlm.nih.gov/entrez/query.fcgi?cmd=Retrieve&amp;db=pubmed&amp;dopt=Abstract&amp;list_uids=27578985">http://www.ncbi.nlm.nih.gov/entrez/query.fcgi?cmd=Retrieve&amp;db=pubmed&amp;dopt=Abstract&amp;list_uids=27578985</a>  6 Onco Targets Ther 9   2016 Journal Article |
| rfxank  | pik3r2   | <a href="http://www.ncbi.nlm.nih.gov/entrez/query.fcgi?cmd=Retrieve&amp;db=pubmed&amp;dopt=Abstract&amp;list_uids=27578985">http://www.ncbi.nlm.nih.gov/entrez/query.fcgi?cmd=Retrieve&amp;db=pubmed&amp;dopt=Abstract&amp;list_uids=27578985</a>  6 Onco Targets Ther 9   2016 Journal Article |
| pik3r2  | uts2r    | <a href="http://www.ncbi.nlm.nih.gov/entrez/query.fcgi?cmd=Retrieve&amp;db=pubmed&amp;dopt=Abstract&amp;list_uids=27578985">http://www.ncbi.nlm.nih.gov/entrez/query.fcgi?cmd=Retrieve&amp;db=pubmed&amp;dopt=Abstract&amp;list_uids=27578985</a>  6 Onco Targets Ther 9   2016 Journal Article |
| pik3r2  | mirn216a | <a href="http://www.ncbi.nlm.nih.gov/entrez/query.fcgi?cmd=Retrieve&amp;db=pubmed&amp;dopt=Abstract&amp;list_uids=27578985">http://www.ncbi.nlm.nih.gov/entrez/query.fcgi?cmd=Retrieve&amp;db=pubmed&amp;dopt=Abstract&amp;list_uids=27578985</a>  6 Onco Targets Ther 9   2016 Journal Article |
| pik3r2  | akt1     | <a href="http://www.ncbi.nlm.nih.gov/entrez/query.fcgi?cmd=Retrieve&amp;db=pubmed&amp;dopt=Abstract&amp;list_uids=27578985">http://www.ncbi.nlm.nih.gov/entrez/query.fcgi?cmd=Retrieve&amp;db=pubmed&amp;dopt=Abstract&amp;list_uids=27578985</a>  6 Onco Targets Ther 9   2016 Journal Article |
| pik3r2  | pik3ca   | <a href="http://www.ncbi.nlm.nih.gov/entrez/query.fcgi?cmd=Retrieve&amp;db=pubmed&amp;dopt=Abstract&amp;list_uids=27578985">http://www.ncbi.nlm.nih.gov/entrez/query.fcgi?cmd=Retrieve&amp;db=pubmed&amp;dopt=Abstract&amp;list_uids=27578985</a>  6 Onco Targets Ther 9   2016 Journal Article |
| id2     | tcf4     | <a href="http://www.ncbi.nlm.nih.gov/entrez/query.fcgi?cmd=Retrieve&amp;db=pubmed&amp;dopt=Abstract&amp;list_uids=27580028">http://www.ncbi.nlm.nih.gov/entrez/query.fcgi?cmd=Retrieve&amp;db=pubmed&amp;dopt=Abstract&amp;list_uids=27580028</a>  6 Nature   Aug 2016 JOURNAL ARTICLE          |
| sox12   | cdk2     | <a href="http://www.ncbi.nlm.nih.gov/entrez/query.fcgi?cmd=Retrieve&amp;db=pubmed&amp;dopt=Abstract&amp;list_uids=27582508">http://www.ncbi.nlm.nih.gov/entrez/query.fcgi?cmd=Retrieve&amp;db=pubmed&amp;dopt=Abstract&amp;list_uids=27582508</a>  6 Biosci Rep   Aug 2016 JOURNAL ARTICLE      |
| sox12   | pcna     | <a href="http://www.ncbi.nlm.nih.gov/entrez/query.fcgi?cmd=Retrieve&amp;db=pubmed&amp;dopt=Abstract&amp;list_uids=27582508">http://www.ncbi.nlm.nih.gov/entrez/query.fcgi?cmd=Retrieve&amp;db=pubmed&amp;dopt=Abstract&amp;list_uids=27582508</a>  6 Biosci Rep   Aug 2016 JOURNAL ARTICLE      |
| mirn25  | malat1   | <a href="http://www.ncbi.nlm.nih.gov/entrez/query.fcgi?cmd=Retrieve&amp;db=pubmed&amp;dopt=Abstract&amp;list_uids=27584791">http://www.ncbi.nlm.nih.gov/entrez/query.fcgi?cmd=Retrieve&amp;db=pubmed&amp;dopt=Abstract&amp;list_uids=27584791</a>  6 Cell Death Dis 7 9  2016 Journal Article   |
| rbm24   | malat1   | <a href="http://www.ncbi.nlm.nih.gov/entrez/query.fcgi?cmd=Retrieve&amp;db=pubmed&amp;dopt=Abstract&amp;list_uids=27584791">http://www.ncbi.nlm.nih.gov/entrez/query.fcgi?cmd=Retrieve&amp;db=pubmed&amp;dopt=Abstract&amp;list_uids=27584791</a>  6 Cell Death Dis 7 9  2016 Journal Article   |
| rbm24   | mirn25   | <a href="http://www.ncbi.nlm.nih.gov/entrez/query.fcgi?cmd=Retrieve&amp;db=pubmed&amp;dopt=Abstract&amp;list_uids=27584791">http://www.ncbi.nlm.nih.gov/entrez/query.fcgi?cmd=Retrieve&amp;db=pubmed&amp;dopt=Abstract&amp;list_uids=27584791</a>  6 Cell Death Dis 7 9  2016 Journal Article   |



|           |          |                                                                                                                                                                                                                                                                                                   |
|-----------|----------|---------------------------------------------------------------------------------------------------------------------------------------------------------------------------------------------------------------------------------------------------------------------------------------------------|
| rbm24     | npc1     | <a href="http://www.ncbi.nlm.nih.gov/entrez/query.fcgi?cmd=Retrieve&amp;db=pubmed&amp;dopt=Abstract&amp;list_uids=27584791">http://www.ncbi.nlm.nih.gov/entrez/query.fcgi?cmd=Retrieve&amp;db=pubmed&amp;dopt=Abstract&amp;list_uids=27584791</a>  6 Cell Death Dis 7 9  2016 JOURNAL ARTICLE     |
| loc553103 | itk      | <a href="http://www.ncbi.nlm.nih.gov/entrez/query.fcgi?cmd=Retrieve&amp;db=pubmed&amp;dopt=Abstract&amp;list_uids=27584792">http://www.ncbi.nlm.nih.gov/entrez/query.fcgi?cmd=Retrieve&amp;db=pubmed&amp;dopt=Abstract&amp;list_uids=27584792</a>  6 Cell Death Dis 7 9  2016 JOURNAL ARTICLE     |
| camp      | csda     | <a href="http://www.ncbi.nlm.nih.gov/entrez/query.fcgi?cmd=Retrieve&amp;db=pubmed&amp;dopt=Abstract&amp;list_uids=27588122">http://www.ncbi.nlm.nih.gov/entrez/query.fcgi?cmd=Retrieve&amp;db=pubmed&amp;dopt=Abstract&amp;list_uids=27588122</a>  6 Oncol Lett 12 3 Sep 2016 JOURNAL ARTICLE     |
| csda      | serpinb3 | <a href="http://www.ncbi.nlm.nih.gov/entrez/query.fcgi?cmd=Retrieve&amp;db=pubmed&amp;dopt=Abstract&amp;list_uids=27588122">http://www.ncbi.nlm.nih.gov/entrez/query.fcgi?cmd=Retrieve&amp;db=pubmed&amp;dopt=Abstract&amp;list_uids=27588122</a>  6 Oncol Lett 12 3 Sep 2016 JOURNAL ARTICLE     |
| mirn204   | atf2     | <a href="http://www.ncbi.nlm.nih.gov/entrez/query.fcgi?cmd=Retrieve&amp;db=pubmed&amp;dopt=Abstract&amp;list_uids=27588402">http://www.ncbi.nlm.nih.gov/entrez/query.fcgi?cmd=Retrieve&amp;db=pubmed&amp;dopt=Abstract&amp;list_uids=27588402</a>  6 Oncotarget   Aug 2016 JOURNAL ARTICLE        |
| lepr      | ephb2    | <a href="http://www.ncbi.nlm.nih.gov/entrez/query.fcgi?cmd=Retrieve&amp;db=pubmed&amp;dopt=Abstract&amp;list_uids=27588409">http://www.ncbi.nlm.nih.gov/entrez/query.fcgi?cmd=Retrieve&amp;db=pubmed&amp;dopt=Abstract&amp;list_uids=27588409</a>  6 Oncotarget   Aug 2016 JOURNAL ARTICLE        |
| lepr      | mapk14   | <a href="http://www.ncbi.nlm.nih.gov/entrez/query.fcgi?cmd=Retrieve&amp;db=pubmed&amp;dopt=Abstract&amp;list_uids=27588409">http://www.ncbi.nlm.nih.gov/entrez/query.fcgi?cmd=Retrieve&amp;db=pubmed&amp;dopt=Abstract&amp;list_uids=27588409</a>  6 Oncotarget   Aug 2016 JOURNAL ARTICLE        |
| st6gal1   | pc-3     | <a href="http://www.ncbi.nlm.nih.gov/entrez/query.fcgi?cmd=Retrieve&amp;db=pubmed&amp;dopt=Abstract&amp;list_uids=27588482">http://www.ncbi.nlm.nih.gov/entrez/query.fcgi?cmd=Retrieve&amp;db=pubmed&amp;dopt=Abstract&amp;list_uids=27588482</a>  6 Oncotarget   Aug 2016 JOURNAL ARTICLE        |
| il34      | phgdh    | <a href="http://www.ncbi.nlm.nih.gov/entrez/query.fcgi?cmd=Retrieve&amp;db=pubmed&amp;dopt=Abstract&amp;list_uids=27593106">http://www.ncbi.nlm.nih.gov/entrez/query.fcgi?cmd=Retrieve&amp;db=pubmed&amp;dopt=Abstract&amp;list_uids=27593106</a>  6 J Hepatol   Sep 2016 JOURNAL ARTICLE         |
| il34      | fbn2     | <a href="http://www.ncbi.nlm.nih.gov/entrez/query.fcgi?cmd=Retrieve&amp;db=pubmed&amp;dopt=Abstract&amp;list_uids=27593106">http://www.ncbi.nlm.nih.gov/entrez/query.fcgi?cmd=Retrieve&amp;db=pubmed&amp;dopt=Abstract&amp;list_uids=27593106</a>  6 J Hepatol   Sep 2016 JOURNAL ARTICLE         |
| csf1r     | mrc1     | <a href="http://www.ncbi.nlm.nih.gov/entrez/query.fcgi?cmd=Retrieve&amp;db=pubmed&amp;dopt=Abstract&amp;list_uids=27593106">http://www.ncbi.nlm.nih.gov/entrez/query.fcgi?cmd=Retrieve&amp;db=pubmed&amp;dopt=Abstract&amp;list_uids=27593106</a>  6 J Hepatol   Sep 2016 JOURNAL ARTICLE         |
| cd68      | mrc1     | <a href="http://www.ncbi.nlm.nih.gov/entrez/query.fcgi?cmd=Retrieve&amp;db=pubmed&amp;dopt=Abstract&amp;list_uids=27593106">http://www.ncbi.nlm.nih.gov/entrez/query.fcgi?cmd=Retrieve&amp;db=pubmed&amp;dopt=Abstract&amp;list_uids=27593106</a>  6 J Hepatol   Sep 2016 JOURNAL ARTICLE         |
| cd68      | csf1r    | <a href="http://www.ncbi.nlm.nih.gov/entrez/query.fcgi?cmd=Retrieve&amp;db=pubmed&amp;dopt=Abstract&amp;list_uids=27593106">http://www.ncbi.nlm.nih.gov/entrez/query.fcgi?cmd=Retrieve&amp;db=pubmed&amp;dopt=Abstract&amp;list_uids=27593106</a>  6 J Hepatol   Sep 2016 JOURNAL ARTICLE         |
| hpse      | lef1     | <a href="http://www.ncbi.nlm.nih.gov/entrez/query.fcgi?cmd=Retrieve&amp;db=pubmed&amp;dopt=Abstract&amp;list_uids=27595937">http://www.ncbi.nlm.nih.gov/entrez/query.fcgi?cmd=Retrieve&amp;db=pubmed&amp;dopt=Abstract&amp;list_uids=27595937</a>  6 Sci Rep 6   2016 JOURNAL ARTICLE             |
| slamf7    | egf      | <a href="http://www.ncbi.nlm.nih.gov/entrez/query.fcgi?cmd=Retrieve&amp;db=pubmed&amp;dopt=Abstract&amp;list_uids=27598237">http://www.ncbi.nlm.nih.gov/entrez/query.fcgi?cmd=Retrieve&amp;db=pubmed&amp;dopt=Abstract&amp;list_uids=27598237</a>  6 Eur J Med Chem 124  Aug 2016 JOURNAL ARTICLE |
| ppm1h     | itk      | <a href="http://www.ncbi.nlm.nih.gov/entrez/query.fcgi?cmd=Retrieve&amp;db=pubmed&amp;dopt=Abstract&amp;list_uids=27599670">http://www.ncbi.nlm.nih.gov/entrez/query.fcgi?cmd=Retrieve&amp;db=pubmed&amp;dopt=Abstract&amp;list_uids=27599670</a>  6 Oncol Rep   Sep 2016 JOURNAL ARTICLE         |
| znf395    | akt1     | <a href="http://www.ncbi.nlm.nih.gov/entrez/query.fcgi?cmd=Retrieve&amp;db=pubmed&amp;dopt=Abstract&amp;list_uids=27599909">http://www.ncbi.nlm.nih.gov/entrez/query.fcgi?cmd=Retrieve&amp;db=pubmed&amp;dopt=Abstract&amp;list_uids=27599909</a>  6 Mol Med Rep   Sep 2016 JOURNAL ARTICLE       |
| znf395    | stat3    | <a href="http://www.ncbi.nlm.nih.gov/entrez/query.fcgi?cmd=Retrieve&amp;db=pubmed&amp;dopt=Abstract&amp;list_uids=27599909">http://www.ncbi.nlm.nih.gov/entrez/query.fcgi?cmd=Retrieve&amp;db=pubmed&amp;dopt=Abstract&amp;list_uids=27599909</a>  6 Mol Med Rep   Sep 2016 JOURNAL ARTICLE       |

|        |        |                                                                                                                                                                                                                                                                                                |
|--------|--------|------------------------------------------------------------------------------------------------------------------------------------------------------------------------------------------------------------------------------------------------------------------------------------------------|
| znf395 | mapk8  | <a href="http://www.ncbi.nlm.nih.gov/entrez/query.fcgi?cmd=Retrieve&amp;db=pubmed&amp;dopt=Abstract&amp;list_uids=27599909">http://www.ncbi.nlm.nih.gov/entrez/query.fcgi?cmd=Retrieve&amp;db=pubmed&amp;dopt=Abstract&amp;list_uids=27599909</a>  6 Mol Med Rep   Sep 2016 JOURNAL ARTICLE    |
| app    | akt1   | <a href="http://www.ncbi.nlm.nih.gov/entrez/query.fcgi?cmd=Retrieve&amp;db=pubmed&amp;dopt=Abstract&amp;list_uids=27599909">http://www.ncbi.nlm.nih.gov/entrez/query.fcgi?cmd=Retrieve&amp;db=pubmed&amp;dopt=Abstract&amp;list_uids=27599909</a>  6 Mol Med Rep   Sep 2016 JOURNAL ARTICLE    |
| app    | stat3  | <a href="http://www.ncbi.nlm.nih.gov/entrez/query.fcgi?cmd=Retrieve&amp;db=pubmed&amp;dopt=Abstract&amp;list_uids=27599909">http://www.ncbi.nlm.nih.gov/entrez/query.fcgi?cmd=Retrieve&amp;db=pubmed&amp;dopt=Abstract&amp;list_uids=27599909</a>  6 Mol Med Rep   Sep 2016 JOURNAL ARTICLE    |
| app    | mapk8  | <a href="http://www.ncbi.nlm.nih.gov/entrez/query.fcgi?cmd=Retrieve&amp;db=pubmed&amp;dopt=Abstract&amp;list_uids=27599909">http://www.ncbi.nlm.nih.gov/entrez/query.fcgi?cmd=Retrieve&amp;db=pubmed&amp;dopt=Abstract&amp;list_uids=27599909</a>  6 Mol Med Rep   Sep 2016 JOURNAL ARTICLE    |
| app    | znf395 | <a href="http://www.ncbi.nlm.nih.gov/entrez/query.fcgi?cmd=Retrieve&amp;db=pubmed&amp;dopt=Abstract&amp;list_uids=27599909">http://www.ncbi.nlm.nih.gov/entrez/query.fcgi?cmd=Retrieve&amp;db=pubmed&amp;dopt=Abstract&amp;list_uids=27599909</a>  6 Mol Med Rep   Sep 2016 JOURNAL ARTICLE    |
| tarbp2 | akt1   | <a href="http://www.ncbi.nlm.nih.gov/entrez/query.fcgi?cmd=Retrieve&amp;db=pubmed&amp;dopt=Abstract&amp;list_uids=27599909">http://www.ncbi.nlm.nih.gov/entrez/query.fcgi?cmd=Retrieve&amp;db=pubmed&amp;dopt=Abstract&amp;list_uids=27599909</a>  6 Mol Med Rep   Sep 2016 JOURNAL ARTICLE    |
| tarbp2 | stat3  | <a href="http://www.ncbi.nlm.nih.gov/entrez/query.fcgi?cmd=Retrieve&amp;db=pubmed&amp;dopt=Abstract&amp;list_uids=27599909">http://www.ncbi.nlm.nih.gov/entrez/query.fcgi?cmd=Retrieve&amp;db=pubmed&amp;dopt=Abstract&amp;list_uids=27599909</a>  6 Mol Med Rep   Sep 2016 JOURNAL ARTICLE    |
| tarbp2 | mapk8  | <a href="http://www.ncbi.nlm.nih.gov/entrez/query.fcgi?cmd=Retrieve&amp;db=pubmed&amp;dopt=Abstract&amp;list_uids=27599909">http://www.ncbi.nlm.nih.gov/entrez/query.fcgi?cmd=Retrieve&amp;db=pubmed&amp;dopt=Abstract&amp;list_uids=27599909</a>  6 Mol Med Rep   Sep 2016 JOURNAL ARTICLE    |
| tarbp2 | znf395 | <a href="http://www.ncbi.nlm.nih.gov/entrez/query.fcgi?cmd=Retrieve&amp;db=pubmed&amp;dopt=Abstract&amp;list_uids=27599909">http://www.ncbi.nlm.nih.gov/entrez/query.fcgi?cmd=Retrieve&amp;db=pubmed&amp;dopt=Abstract&amp;list_uids=27599909</a>  6 Mol Med Rep   Sep 2016 JOURNAL ARTICLE    |
| tarbp2 | app    | <a href="http://www.ncbi.nlm.nih.gov/entrez/query.fcgi?cmd=Retrieve&amp;db=pubmed&amp;dopt=Abstract&amp;list_uids=27599909">http://www.ncbi.nlm.nih.gov/entrez/query.fcgi?cmd=Retrieve&amp;db=pubmed&amp;dopt=Abstract&amp;list_uids=27599909</a>  6 Mol Med Rep   Sep 2016 JOURNAL ARTICLE    |
| tar    | tarbp2 | <a href="http://www.ncbi.nlm.nih.gov/entrez/query.fcgi?cmd=Retrieve&amp;db=pubmed&amp;dopt=Abstract&amp;list_uids=27599909">http://www.ncbi.nlm.nih.gov/entrez/query.fcgi?cmd=Retrieve&amp;db=pubmed&amp;dopt=Abstract&amp;list_uids=27599909</a>  6 Mol Med Rep   Sep 2016 JOURNAL ARTICLE    |
| hoxa7  | hcc    | <a href="http://www.ncbi.nlm.nih.gov/entrez/query.fcgi?cmd=Retrieve&amp;db=pubmed&amp;dopt=Abstract&amp;list_uids=27600149">http://www.ncbi.nlm.nih.gov/entrez/query.fcgi?cmd=Retrieve&amp;db=pubmed&amp;dopt=Abstract&amp;list_uids=27600149</a>  6 Mol Cancer 15 1  2016 Journal Article     |
| mitf   | mmp13  | <a href="http://www.ncbi.nlm.nih.gov/entrez/query.fcgi?cmd=Retrieve&amp;db=pubmed&amp;dopt=Abstract&amp;list_uids=27600927">http://www.ncbi.nlm.nih.gov/entrez/query.fcgi?cmd=Retrieve&amp;db=pubmed&amp;dopt=Abstract&amp;list_uids=27600927</a>  6 J Dermatol Sci   Jun 2016 JOURNAL ARTICLE |
| mitf   | mmp14  | <a href="http://www.ncbi.nlm.nih.gov/entrez/query.fcgi?cmd=Retrieve&amp;db=pubmed&amp;dopt=Abstract&amp;list_uids=27600927">http://www.ncbi.nlm.nih.gov/entrez/query.fcgi?cmd=Retrieve&amp;db=pubmed&amp;dopt=Abstract&amp;list_uids=27600927</a>  6 J Dermatol Sci   Jun 2016 JOURNAL ARTICLE |
| mitf   | mmp2   | <a href="http://www.ncbi.nlm.nih.gov/entrez/query.fcgi?cmd=Retrieve&amp;db=pubmed&amp;dopt=Abstract&amp;list_uids=27600927">http://www.ncbi.nlm.nih.gov/entrez/query.fcgi?cmd=Retrieve&amp;db=pubmed&amp;dopt=Abstract&amp;list_uids=27600927</a>  6 J Dermatol Sci   Jun 2016 JOURNAL ARTICLE |
| mitf   | hnf4a  | <a href="http://www.ncbi.nlm.nih.gov/entrez/query.fcgi?cmd=Retrieve&amp;db=pubmed&amp;dopt=Abstract&amp;list_uids=27600927">http://www.ncbi.nlm.nih.gov/entrez/query.fcgi?cmd=Retrieve&amp;db=pubmed&amp;dopt=Abstract&amp;list_uids=27600927</a>  6 J Dermatol Sci   Jun 2016 JOURNAL ARTICLE |
| phb2   | ephb2  | <a href="http://www.ncbi.nlm.nih.gov/entrez/query.fcgi?cmd=Retrieve&amp;db=pubmed&amp;dopt=Abstract&amp;list_uids=27601158">http://www.ncbi.nlm.nih.gov/entrez/query.fcgi?cmd=Retrieve&amp;db=pubmed&amp;dopt=Abstract&amp;list_uids=27601158</a>  6 Int J Oncol   Aug 2016 JOURNAL ARTICLE    |
| phb2   | ahr    | <a href="http://www.ncbi.nlm.nih.gov/entrez/query.fcgi?cmd=Retrieve&amp;db=pubmed&amp;dopt=Abstract&amp;list_uids=27601158">http://www.ncbi.nlm.nih.gov/entrez/query.fcgi?cmd=Retrieve&amp;db=pubmed&amp;dopt=Abstract&amp;list_uids=27601158</a>  6 Int J Oncol   Aug 2016 JOURNAL ARTICLE    |

|         |         |                                                                                                                                                                                                                                                                                               |
|---------|---------|-----------------------------------------------------------------------------------------------------------------------------------------------------------------------------------------------------------------------------------------------------------------------------------------------|
| phb2    | myc     | <a href="http://www.ncbi.nlm.nih.gov/entrez/query.fcgi?cmd=Retrieve&amp;db=pubmed&amp;dopt=Abstract&amp;list_uids=27601158">http://www.ncbi.nlm.nih.gov/entrez/query.fcgi?cmd=Retrieve&amp;db=pubmed&amp;dopt=Abstract&amp;list_uids=27601158</a>  6 Int J Oncol   Aug 2016 JOURNAL ARTICLE   |
| phb2    | mmp9    | <a href="http://www.ncbi.nlm.nih.gov/entrez/query.fcgi?cmd=Retrieve&amp;db=pubmed&amp;dopt=Abstract&amp;list_uids=27601158">http://www.ncbi.nlm.nih.gov/entrez/query.fcgi?cmd=Retrieve&amp;db=pubmed&amp;dopt=Abstract&amp;list_uids=27601158</a>  6 Int J Oncol   Aug 2016 JOURNAL ARTICLE   |
| wnt5a   | mapk8   | <a href="http://www.ncbi.nlm.nih.gov/entrez/query.fcgi?cmd=Retrieve&amp;db=pubmed&amp;dopt=Abstract&amp;list_uids=27602114">http://www.ncbi.nlm.nih.gov/entrez/query.fcgi?cmd=Retrieve&amp;db=pubmed&amp;dopt=Abstract&amp;list_uids=27602114</a>  6 Oncol Lett 12 3 Sep 2016 JOURNAL ARTICLE |
| wnt5a   | mmp2    | <a href="http://www.ncbi.nlm.nih.gov/entrez/query.fcgi?cmd=Retrieve&amp;db=pubmed&amp;dopt=Abstract&amp;list_uids=27602114">http://www.ncbi.nlm.nih.gov/entrez/query.fcgi?cmd=Retrieve&amp;db=pubmed&amp;dopt=Abstract&amp;list_uids=27602114</a>  6 Oncol Lett 12 3 Sep 2016 JOURNAL ARTICLE |
| ulbp2   | adam10  | <a href="http://www.ncbi.nlm.nih.gov/entrez/query.fcgi?cmd=Retrieve&amp;db=pubmed&amp;dopt=Abstract&amp;list_uids=27602753">http://www.ncbi.nlm.nih.gov/entrez/query.fcgi?cmd=Retrieve&amp;db=pubmed&amp;dopt=Abstract&amp;list_uids=27602753</a>  6 Oncotarget   Sep 2016 JOURNAL ARTICLE    |
| mia     | adam10  | <a href="http://www.ncbi.nlm.nih.gov/entrez/query.fcgi?cmd=Retrieve&amp;db=pubmed&amp;dopt=Abstract&amp;list_uids=27602753">http://www.ncbi.nlm.nih.gov/entrez/query.fcgi?cmd=Retrieve&amp;db=pubmed&amp;dopt=Abstract&amp;list_uids=27602753</a>  6 Oncotarget   Sep 2016 JOURNAL ARTICLE    |
| hmga1   | mirn222 | <a href="http://www.ncbi.nlm.nih.gov/entrez/query.fcgi?cmd=Retrieve&amp;db=pubmed&amp;dopt=Abstract&amp;list_uids=27602961">http://www.ncbi.nlm.nih.gov/entrez/query.fcgi?cmd=Retrieve&amp;db=pubmed&amp;dopt=Abstract&amp;list_uids=27602961</a>  6 Oncotarget   Sep 2016 JOURNAL ARTICLE    |
| hmga1   | ppp2r2a | <a href="http://www.ncbi.nlm.nih.gov/entrez/query.fcgi?cmd=Retrieve&amp;db=pubmed&amp;dopt=Abstract&amp;list_uids=27602961">http://www.ncbi.nlm.nih.gov/entrez/query.fcgi?cmd=Retrieve&amp;db=pubmed&amp;dopt=Abstract&amp;list_uids=27602961</a>  6 Oncotarget   Sep 2016 JOURNAL ARTICLE    |
| hmga1   | akt1    | <a href="http://www.ncbi.nlm.nih.gov/entrez/query.fcgi?cmd=Retrieve&amp;db=pubmed&amp;dopt=Abstract&amp;list_uids=27602961">http://www.ncbi.nlm.nih.gov/entrez/query.fcgi?cmd=Retrieve&amp;db=pubmed&amp;dopt=Abstract&amp;list_uids=27602961</a>  6 Oncotarget   Sep 2016 JOURNAL ARTICLE    |
| il24    | ppp2r2a | <a href="http://www.ncbi.nlm.nih.gov/entrez/query.fcgi?cmd=Retrieve&amp;db=pubmed&amp;dopt=Abstract&amp;list_uids=27602961">http://www.ncbi.nlm.nih.gov/entrez/query.fcgi?cmd=Retrieve&amp;db=pubmed&amp;dopt=Abstract&amp;list_uids=27602961</a>  6 Oncotarget   Sep 2016 JOURNAL ARTICLE    |
| il24    | mirn222 | <a href="http://www.ncbi.nlm.nih.gov/entrez/query.fcgi?cmd=Retrieve&amp;db=pubmed&amp;dopt=Abstract&amp;list_uids=27602961">http://www.ncbi.nlm.nih.gov/entrez/query.fcgi?cmd=Retrieve&amp;db=pubmed&amp;dopt=Abstract&amp;list_uids=27602961</a>  6 Oncotarget   Sep 2016 JOURNAL ARTICLE    |
| il24    | hmga1   | <a href="http://www.ncbi.nlm.nih.gov/entrez/query.fcgi?cmd=Retrieve&amp;db=pubmed&amp;dopt=Abstract&amp;list_uids=27602961">http://www.ncbi.nlm.nih.gov/entrez/query.fcgi?cmd=Retrieve&amp;db=pubmed&amp;dopt=Abstract&amp;list_uids=27602961</a>  6 Oncotarget   Sep 2016 JOURNAL ARTICLE    |
| il24    | akt1    | <a href="http://www.ncbi.nlm.nih.gov/entrez/query.fcgi?cmd=Retrieve&amp;db=pubmed&amp;dopt=Abstract&amp;list_uids=27602961">http://www.ncbi.nlm.nih.gov/entrez/query.fcgi?cmd=Retrieve&amp;db=pubmed&amp;dopt=Abstract&amp;list_uids=27602961</a>  6 Oncotarget   Sep 2016 JOURNAL ARTICLE    |
| mirn222 | ppp2r2a | <a href="http://www.ncbi.nlm.nih.gov/entrez/query.fcgi?cmd=Retrieve&amp;db=pubmed&amp;dopt=Abstract&amp;list_uids=27602961">http://www.ncbi.nlm.nih.gov/entrez/query.fcgi?cmd=Retrieve&amp;db=pubmed&amp;dopt=Abstract&amp;list_uids=27602961</a>  6 Oncotarget   Sep 2016 JOURNAL ARTICLE    |
| fosl1   | fosl2   | <a href="http://www.ncbi.nlm.nih.gov/entrez/query.fcgi?cmd=Retrieve&amp;db=pubmed&amp;dopt=Abstract&amp;list_uids=27604827">http://www.ncbi.nlm.nih.gov/entrez/query.fcgi?cmd=Retrieve&amp;db=pubmed&amp;dopt=Abstract&amp;list_uids=27604827</a>  6 Prostate   Sep 2016 JOURNAL ARTICLE      |
| fosb    | fosl2   | <a href="http://www.ncbi.nlm.nih.gov/entrez/query.fcgi?cmd=Retrieve&amp;db=pubmed&amp;dopt=Abstract&amp;list_uids=27604827">http://www.ncbi.nlm.nih.gov/entrez/query.fcgi?cmd=Retrieve&amp;db=pubmed&amp;dopt=Abstract&amp;list_uids=27604827</a>  6 Prostate   Sep 2016 JOURNAL ARTICLE      |
| fosb    | fosl1   | <a href="http://www.ncbi.nlm.nih.gov/entrez/query.fcgi?cmd=Retrieve&amp;db=pubmed&amp;dopt=Abstract&amp;list_uids=27604827">http://www.ncbi.nlm.nih.gov/entrez/query.fcgi?cmd=Retrieve&amp;db=pubmed&amp;dopt=Abstract&amp;list_uids=27604827</a>  6 Prostate   Sep 2016 JOURNAL ARTICLE      |
| jund    | fosl2   | <a href="http://www.ncbi.nlm.nih.gov/entrez/query.fcgi?cmd=Retrieve&amp;db=pubmed&amp;dopt=Abstract&amp;list_uids=27604827">http://www.ncbi.nlm.nih.gov/entrez/query.fcgi?cmd=Retrieve&amp;db=pubmed&amp;dopt=Abstract&amp;list_uids=27604827</a>  6 Prostate   Sep 2016 JOURNAL ARTICLE      |

|         |              |                                                                                                                                                                                                                                                                                                                  |
|---------|--------------|------------------------------------------------------------------------------------------------------------------------------------------------------------------------------------------------------------------------------------------------------------------------------------------------------------------|
| jund    | fosl1        | <a href="http://www.ncbi.nlm.nih.gov/entrez/query.fcgi?cmd=Retrieve&amp;db=pubmed&amp;dopt=Abstract&amp;list_uids=27604827">http://www.ncbi.nlm.nih.gov/entrez/query.fcgi?cmd=Retrieve&amp;db=pubmed&amp;dopt=Abstract&amp;list_uids=27604827</a>  6 Prostate  <br>Sep 2016 JOURNAL ARTICLE                      |
| jund    | fosb         | <a href="http://www.ncbi.nlm.nih.gov/entrez/query.fcgi?cmd=Retrieve&amp;db=pubmed&amp;dopt=Abstract&amp;list_uids=27604827">http://www.ncbi.nlm.nih.gov/entrez/query.fcgi?cmd=Retrieve&amp;db=pubmed&amp;dopt=Abstract&amp;list_uids=27604827</a>  6 Prostate  <br>Sep 2016 JOURNAL ARTICLE                      |
| junb    | fosl2        | <a href="http://www.ncbi.nlm.nih.gov/entrez/query.fcgi?cmd=Retrieve&amp;db=pubmed&amp;dopt=Abstract&amp;list_uids=27604827">http://www.ncbi.nlm.nih.gov/entrez/query.fcgi?cmd=Retrieve&amp;db=pubmed&amp;dopt=Abstract&amp;list_uids=27604827</a>  6 Prostate  <br>Sep 2016 JOURNAL ARTICLE                      |
| junb    | fosl1        | <a href="http://www.ncbi.nlm.nih.gov/entrez/query.fcgi?cmd=Retrieve&amp;db=pubmed&amp;dopt=Abstract&amp;list_uids=27604827">http://www.ncbi.nlm.nih.gov/entrez/query.fcgi?cmd=Retrieve&amp;db=pubmed&amp;dopt=Abstract&amp;list_uids=27604827</a>  6 Prostate  <br>Sep 2016 JOURNAL ARTICLE                      |
| junb    | fosb         | <a href="http://www.ncbi.nlm.nih.gov/entrez/query.fcgi?cmd=Retrieve&amp;db=pubmed&amp;dopt=Abstract&amp;list_uids=27604827">http://www.ncbi.nlm.nih.gov/entrez/query.fcgi?cmd=Retrieve&amp;db=pubmed&amp;dopt=Abstract&amp;list_uids=27604827</a>  6 Prostate  <br>Sep 2016 JOURNAL ARTICLE                      |
| junb    | jund         | <a href="http://www.ncbi.nlm.nih.gov/entrez/query.fcgi?cmd=Retrieve&amp;db=pubmed&amp;dopt=Abstract&amp;list_uids=27604827">http://www.ncbi.nlm.nih.gov/entrez/query.fcgi?cmd=Retrieve&amp;db=pubmed&amp;dopt=Abstract&amp;list_uids=27604827</a>  6 Prostate  <br>Sep 2016 JOURNAL ARTICLE                      |
| stat5a  | akt1         | <a href="http://www.ncbi.nlm.nih.gov/entrez/query.fcgi?cmd=Retrieve&amp;db=pubmed&amp;dopt=Abstract&amp;list_uids=27605043">http://www.ncbi.nlm.nih.gov/entrez/query.fcgi?cmd=Retrieve&amp;db=pubmed&amp;dopt=Abstract&amp;list_uids=27605043</a>  6 Sci<br>Rep 6  2016 Journal Article                          |
| ctd     | 4.1.2.1<br>3 | <a href="http://www.ncbi.nlm.nih.gov/entrez/query.fcgi?cmd=Retrieve&amp;db=pubmed&amp;dopt=Abstract&amp;list_uids=27607074">http://www.ncbi.nlm.nih.gov/entrez/query.fcgi?cmd=Retrieve&amp;db=pubmed&amp;dopt=Abstract&amp;list_uids=27607074</a>  6 PLoS<br>One 11 9  2016 Journal Article                      |
| ctd     | trap         | <a href="http://www.ncbi.nlm.nih.gov/entrez/query.fcgi?cmd=Retrieve&amp;db=pubmed&amp;dopt=Abstract&amp;list_uids=27607074">http://www.ncbi.nlm.nih.gov/entrez/query.fcgi?cmd=Retrieve&amp;db=pubmed&amp;dopt=Abstract&amp;list_uids=27607074</a>  6 PLoS<br>One 11 9  2016 Journal Article                      |
| rhce    | 4.1.2.1<br>3 | <a href="http://www.ncbi.nlm.nih.gov/entrez/query.fcgi?cmd=Retrieve&amp;db=pubmed&amp;dopt=Abstract&amp;list_uids=27607074">http://www.ncbi.nlm.nih.gov/entrez/query.fcgi?cmd=Retrieve&amp;db=pubmed&amp;dopt=Abstract&amp;list_uids=27607074</a>  6 PLoS<br>One 11 9  2016 Journal Article                      |
| trap    | 4.1.2.1<br>3 | <a href="http://www.ncbi.nlm.nih.gov/entrez/query.fcgi?cmd=Retrieve&amp;db=pubmed&amp;dopt=Abstract&amp;list_uids=27607074">http://www.ncbi.nlm.nih.gov/entrez/query.fcgi?cmd=Retrieve&amp;db=pubmed&amp;dopt=Abstract&amp;list_uids=27607074</a>  6 PLoS<br>One 11 9  2016 Journal Article                      |
| nos2    | s100a4       | <a href="http://www.ncbi.nlm.nih.gov/entrez/query.fcgi?cmd=Retrieve&amp;db=pubmed&amp;dopt=Abstract&amp;list_uids=27608331">http://www.ncbi.nlm.nih.gov/entrez/query.fcgi?cmd=Retrieve&amp;db=pubmed&amp;dopt=Abstract&amp;list_uids=27608331</a>  6 Photoche<br>m Photobiol   Sep 2016 JOURNAL ARTICLE          |
| phactr4 | hcc          | <a href="http://www.ncbi.nlm.nih.gov/entrez/query.fcgi?cmd=Retrieve&amp;db=pubmed&amp;dopt=Abstract&amp;list_uids=27608898">http://www.ncbi.nlm.nih.gov/entrez/query.fcgi?cmd=Retrieve&amp;db=pubmed&amp;dopt=Abstract&amp;list_uids=27608898</a>  6 Eur Rev<br>Med Pharmacol Sci 20 16 Aug 2016 Journal Article |
| phactr4 | ppa1         | <a href="http://www.ncbi.nlm.nih.gov/entrez/query.fcgi?cmd=Retrieve&amp;db=pubmed&amp;dopt=Abstract&amp;list_uids=27608898">http://www.ncbi.nlm.nih.gov/entrez/query.fcgi?cmd=Retrieve&amp;db=pubmed&amp;dopt=Abstract&amp;list_uids=27608898</a>  6 Eur Rev<br>Med Pharmacol Sci 20 16 Aug 2016 Journal Article |
| phactr4 | stat3        | <a href="http://www.ncbi.nlm.nih.gov/entrez/query.fcgi?cmd=Retrieve&amp;db=pubmed&amp;dopt=Abstract&amp;list_uids=27608898">http://www.ncbi.nlm.nih.gov/entrez/query.fcgi?cmd=Retrieve&amp;db=pubmed&amp;dopt=Abstract&amp;list_uids=27608898</a>  6 Eur Rev<br>Med Pharmacol Sci 20 16 Aug 2016 Journal Article |
| phactr4 | il6          | <a href="http://www.ncbi.nlm.nih.gov/entrez/query.fcgi?cmd=Retrieve&amp;db=pubmed&amp;dopt=Abstract&amp;list_uids=27608898">http://www.ncbi.nlm.nih.gov/entrez/query.fcgi?cmd=Retrieve&amp;db=pubmed&amp;dopt=Abstract&amp;list_uids=27608898</a>  6 Eur Rev<br>Med Pharmacol Sci 20 16 Aug 2016 Journal Article |
| ddx6    | egf          | <a href="http://www.ncbi.nlm.nih.gov/entrez/query.fcgi?cmd=Retrieve&amp;db=pubmed&amp;dopt=Abstract&amp;list_uids=27609774">http://www.ncbi.nlm.nih.gov/entrez/query.fcgi?cmd=Retrieve&amp;db=pubmed&amp;dopt=Abstract&amp;list_uids=27609774</a>  6 FASEB<br>J   Sep 2016 JOURNAL ARTICLE                       |
| anxa1   | itk          | <a href="http://www.ncbi.nlm.nih.gov/entrez/query.fcgi?cmd=Retrieve&amp;db=pubmed&amp;dopt=Abstract&amp;list_uids=27612479">http://www.ncbi.nlm.nih.gov/entrez/query.fcgi?cmd=Retrieve&amp;db=pubmed&amp;dopt=Abstract&amp;list_uids=27612479</a>  6 Tumour<br>Biol   Sep 2016 JOURNAL ARTICLE                   |

|        |       |                                                                                                                                                                                                                                                                                                   |
|--------|-------|---------------------------------------------------------------------------------------------------------------------------------------------------------------------------------------------------------------------------------------------------------------------------------------------------|
| mamld1 | smug1 | <a href="http://www.ncbi.nlm.nih.gov/entrez/query.fcgi?cmd=Retrieve&amp;db=pubmed&amp;dopt=Abstract&amp;list_uids=27613996">http://www.ncbi.nlm.nih.gov/entrez/query.fcgi?cmd=Retrieve&amp;db=pubmed&amp;dopt=Abstract&amp;list_uids=27613996</a>  6 Br Med Bull  Sep 2016 REVIEW,JOURNAL ARTICLE |
|--------|-------|---------------------------------------------------------------------------------------------------------------------------------------------------------------------------------------------------------------------------------------------------------------------------------------------------|

#### List of invasion-associated proteins identified using GLAD4U

| Rank | Gene ID | Gene symbol | Specie       | Score    |
|------|---------|-------------|--------------|----------|
| 1    | 4318    | MMP9        | Homo sapiens | 306.2129 |
| 2    | 4313    | MMP2        | Homo sapiens | 259.7701 |
| 3    | 999     | CDH1        | Homo sapiens | 189.38   |
| 4    | 4323    | MMP14       | Homo sapiens | 121.2408 |
| 5    | 682     | BSG         | Homo sapiens | 103.4729 |
| 6    | 4233    | MET         | Homo sapiens | 97.85923 |
| 7    | 6615    | SNAI1       | Homo sapiens | 81.93426 |
| 8    | 5328    | PLAU        | Homo sapiens | 79.41798 |
| 9    | 5329    | PLAUR       | Homo sapiens | 57.47993 |
| 10   | 6591    | SNAI2       | Homo sapiens | 55.29275 |
| 11   | 5747    | PTK2        | Homo sapiens | 54.31059 |
| 12   | 10855   | HPSE        | Homo sapiens | 53.13603 |
| 13   | 960     | CD44        | Homo sapiens | 52.70118 |
| 14   | 7074    | TIAM1       | Homo sapiens | 52.15575 |
| 15   | 7291    | TWIST1      | Homo sapiens | 50.8607  |

|    |        |          |              |          |
|----|--------|----------|--------------|----------|
| 16 | 8434   | RECK     | Homo sapiens | 47.77837 |
| 17 | 5268   | SERPINB5 | Homo sapiens | 45.28517 |
| 18 | 4312   | MMP1     | Homo sapiens | 45.05728 |
| 19 | 4316   | MMP7     | Homo sapiens | 44.68947 |
| 20 | 6935   | ZEB1     | Homo sapiens | 44.40258 |
| 21 | 3688   | ITGB1    | Homo sapiens | 43.46699 |
| 22 | 1499   | CTNNB1   | Homo sapiens | 42.20405 |
| 23 | 6275   | S100A4   | Homo sapiens | 40.96154 |
| 24 | 406937 | MIR145   | Homo sapiens | 38.99991 |
| 25 | 406991 | MIR21    | Homo sapiens | 37.38722 |
| 26 | 5879   | RAC1     | Homo sapiens | 36.44673 |
| 27 | 92140  | MTDH     | Homo sapiens | 36.32073 |
| 28 | 7852   | CXCR4    | Homo sapiens | 35.27336 |
| 29 | 3091   | HIF1A    | Homo sapiens | 35.15325 |
| 30 | 7077   | TIMP2    | Homo sapiens | 33.38051 |
| 31 | 389    | RHOC     | Homo sapiens | 32.12575 |
| 32 | 6624   | FSCN1    | Homo sapiens | 30.56068 |
| 33 | 10630  | PDPN     | Homo sapiens | 30.48908 |
| 34 | 6696   | SPP1     | Homo sapiens | 30.11507 |
| 35 | 7430   | EZR      | Homo sapiens | 29.41737 |
| 36 | 387    | RHOA     | Homo sapiens | 26.8353  |
| 37 | 11156  | PTP4A3   | Homo sapiens | 26.36996 |
| 38 | 7424   | VEGFC    | Homo sapiens | 26.35193 |
| 39 | 2305   | FOXM1    | Homo sapiens | 26.09057 |
| 40 | 3082   | HGF      | Homo sapiens | 26.00846 |
| 41 | 9839   | ZEB2     | Homo sapiens | 25.61254 |
| 42 | 1000   | CDH2     | Homo sapiens | 25.47979 |
| 43 | 3918   | LAMC2    | Homo sapiens | 25.09343 |
| 44 | 2017   | CTTN     | Homo sapiens | 23.94507 |
| 45 | 6774   | STAT3    | Homo sapiens | 23.86445 |

|    |           |          |              |          |
|----|-----------|----------|--------------|----------|
| 46 | 406903    | MIR10B   | Homo sapiens | 23.51674 |
| 47 | 9112      | MTA1     | Homo sapiens | 22.86938 |
| 48 | 6387      | CXCL12   | Homo sapiens | 22.62813 |
| 49 | 5743      | PTGS2    | Homo sapiens | 21.97044 |
| 50 | 4830      | NME1     | Homo sapiens | 21.95506 |
| 51 | 3685      | ITGAV    | Homo sapiens | 21.94147 |
| 52 | 3611      | ILK      | Homo sapiens | 21.79725 |
| 53 | 7076      | TIMP1    | Homo sapiens | 21.58898 |
| 54 | 2191      | FAP      | Homo sapiens | 21.08628 |
| 55 | 100124700 | HOTAIR   | Homo sapiens | 20.63441 |
| 56 | 5037      | PEBP1    | Homo sapiens | 20.23388 |
| 57 | 3814      | KISS1    | Homo sapiens | 20.03252 |
| 58 | 6678      | SPARC    | Homo sapiens | 19.49895 |
| 59 | 207       | AKT1     | Homo sapiens | 19.3308  |
| 60 | 2146      | EZH2     | Homo sapiens | 19.02944 |
| 61 | 5728      | PTEN     | Homo sapiens | 18.98822 |
| 62 | 977       | CD151    | Homo sapiens | 18.95758 |
| 63 | 2064      | ERBB2    | Homo sapiens | 17.95825 |
| 64 | 3678      | ITGA5    | Homo sapiens | 17.88653 |
| 65 | 558       | AXL      | Homo sapiens | 17.80712 |
| 66 | 1956      | EGFR     | Homo sapiens | 17.74661 |
| 67 | 406985    | MIR200C  | Homo sapiens | 17.50817 |
| 68 | 6093      | ROCK1    | Homo sapiens | 17.28745 |
| 69 | 4322      | MMP13    | Homo sapiens | 17.27934 |
| 70 | 407000    | MIR218-1 | Homo sapiens | 17.16913 |
| 71 | 407040    | MIR34A   | Homo sapiens | 17.07468 |
| 72 | 3675      | ITGA3    | Homo sapiens | 16.88695 |
| 73 | 407035    | MIR31    | Homo sapiens | 16.75173 |
| 74 | 7980      | TFPI2    | Homo sapiens | 15.92418 |
| 75 | 3691      | ITGB4    | Homo sapiens | 15.33351 |

|     |           |           |              |          |
|-----|-----------|-----------|--------------|----------|
| 76  | 27250     | PDCD4     | Homo sapiens | 14.97916 |
| 77  | 7422      | VEGFA     | Homo sapiens | 14.68825 |
| 78  | 4486      | MST1R     | Homo sapiens | 14.55795 |
| 79  | 6714      | SRC       | Homo sapiens | 14.54304 |
| 80  | 7431      | VIM       | Homo sapiens | 14.38527 |
| 81  | 346389    | MACC1     | Homo sapiens | 14.18072 |
| 82  | 56547     | MMP26     | Homo sapiens | 14.16503 |
| 83  | 2113      | ETS1      | Homo sapiens | 14.09341 |
| 84  | 406984    | MIR200B   | Homo sapiens | 14.00377 |
| 85  | 4739      | NEDD9     | Homo sapiens | 14.00338 |
| 86  | 406983    | MIR200A   | Homo sapiens | 13.92346 |
| 87  | 4851      | NOTCH1    | Homo sapiens | 13.80669 |
| 88  | 2735      | GLI1      | Homo sapiens | 13.75057 |
| 89  | 10631     | POSTN     | Homo sapiens | 13.58019 |
| 90  | 100133941 | CD24      | Homo sapiens | 13.56305 |
| 91  | 7474      | WNT5A     | Homo sapiens | 13.51644 |
| 92  | 1500      | CTNND1    | Homo sapiens | 13.39048 |
| 93  | 3655      | ITGA6     | Homo sapiens | 13.32952 |
| 94  | 1969      | EPHA2     | Homo sapiens | 13.27697 |
| 95  | 406913    | MIR126    | Homo sapiens | 12.76673 |
| 96  | 4017      | LOXL2     | Homo sapiens | 12.70852 |
| 97  | 3068      | HDGF      | Homo sapiens | 12.69243 |
| 98  | 11279     | KLF8      | Homo sapiens | 12.56066 |
| 99  | 1236      | CCR7      | Homo sapiens | 12.55289 |
| 100 | 2118      | ETV4      | Homo sapiens | 12.21893 |
| 101 | 100642175 | SPRY4-IT1 | Homo sapiens | 12.08939 |
| 102 | 4582      | MUC1      | Homo sapiens | 12.04041 |
| 103 | 407026    | MIR29C    | Homo sapiens | 11.83173 |
| 104 | 857       | CAV1      | Homo sapiens | 11.78358 |
| 105 | 6768      | ST14      | Homo sapiens | 11.64284 |



|     |        |          |              |          |
|-----|--------|----------|--------------|----------|
| 106 | 3732   | CD82     | Homo sapiens | 11.53079 |
| 107 | 4015   | LOX      | Homo sapiens | 11.38205 |
| 108 | 406958 | MIR182   | Homo sapiens | 11.35229 |
| 109 | 7040   | TGFB1    | Homo sapiens | 11.15337 |
| 110 | 10397  | NDRG1    | Homo sapiens | 11.06278 |
| 111 | 378938 | MALAT1   | Homo sapiens | 10.86058 |
| 112 | 3480   | IGF1R    | Homo sapiens | 10.83799 |
| 113 | 442904 | MIR335   | Homo sapiens | 10.81866 |
| 114 | 10810  | WASF3    | Homo sapiens | 10.81866 |
| 115 | 115908 | CTHRC1   | Homo sapiens | 10.38023 |
| 116 | 1508   | CTSB     | Homo sapiens | 10.37263 |
| 117 | 5829   | PXN      | Homo sapiens | 10.34036 |
| 118 | 4314   | MMP3     | Homo sapiens | 10.27504 |
| 119 | 3984   | LIMK1    | Homo sapiens | 10.26033 |
| 120 | 56649  | TMPRSS4  | Homo sapiens | 10.19158 |
| 121 | 407011 | MIR23B   | Homo sapiens | 10.15155 |
| 122 | 5058   | PAK1     | Homo sapiens | 10.07164 |
| 123 | 768    | CA9      | Homo sapiens | 9.984308 |
| 124 | 406933 | MIR141   | Homo sapiens | 9.969517 |
| 125 | 2149   | F2R      | Homo sapiens | 9.866804 |
| 126 | 3897   | L1CAM    | Homo sapiens | 9.780317 |
| 127 | 407009 | MIR224   | Homo sapiens | 9.645644 |
| 128 | 574447 | MIR146B  | Homo sapiens | 9.391292 |
| 129 | 406987 | MIR204   | Homo sapiens | 9.252239 |
| 130 | 7078   | TIMP3    | Homo sapiens | 9.241503 |
| 131 | 4288   | MKI67    | Homo sapiens | 9.118286 |
| 132 | 4162   | MCAM     | Homo sapiens | 9.081684 |
| 133 | 406893 | MIR101-1 | Homo sapiens | 8.798243 |
| 134 | 57007  | ACKR3    | Homo sapiens | 8.753263 |
| 135 | 976    | ADGRE5   | Homo sapiens | 8.687883 |

|     |        |          |              |          |
|-----|--------|----------|--------------|----------|
| 136 | 118856 | MMP21    | Homo sapiens | 8.492416 |
| 137 | 406907 | MIR124-1 | Homo sapiens | 8.490562 |
| 138 | 673    | BRAF     | Homo sapiens | 8.353496 |
| 139 | 3397   | ID1      | Homo sapiens | 8.349009 |
| 140 | 998    | CDC42    | Homo sapiens | 8.328811 |
| 141 | 406959 | MIR183   | Homo sapiens | 8.325047 |
| 142 | 84634  | KISS1R   | Homo sapiens | 8.319463 |
| 143 | 407006 | MIR221   | Homo sapiens | 8.31054  |
| 144 | 9891   | NUAK1    | Homo sapiens | 8.200702 |
| 145 | 9564   | BCAR1    | Homo sapiens | 8.18904  |
| 146 | 9076   | CLDN1    | Homo sapiens | 8.151938 |
| 147 | 406935 | MIR143   | Homo sapiens | 8.023444 |
| 148 | 4325   | MMP16    | Homo sapiens | 7.95668  |
| 149 | 9788   | MTSS1    | Homo sapiens | 7.95668  |
| 150 | 6382   | SDC1     | Homo sapiens | 7.893165 |
| 151 | 406922 | MIR133A1 | Homo sapiens | 7.840345 |
| 152 | 406986 | MIR203A  | Homo sapiens | 7.836954 |
| 153 | 4249   | MGAT5    | Homo sapiens | 7.836181 |
| 154 | 4838   | NODAL    | Homo sapiens | 7.79663  |
| 155 | 406936 | MIR144   | Homo sapiens | 7.676461 |
| 156 | 1015   | CDH17    | Homo sapiens | 7.540654 |
| 157 | 406996 | MIR214   | Homo sapiens | 7.525747 |
| 158 | 8754   | ADAM9    | Homo sapiens | 7.525747 |
| 159 | 4072   | EPCAM    | Homo sapiens | 7.40065  |
| 160 | 1950   | EGF      | Homo sapiens | 7.37619  |
| 161 | 442890 | MIR133B  | Homo sapiens | 7.303364 |
| 162 | 648    | BMI1     | Homo sapiens | 7.273169 |
| 163 | 6286   | S100P    | Homo sapiens | 7.101097 |
| 164 | 407014 | MIR25    | Homo sapiens | 7.079069 |
| 165 | 407007 | MIR222   | Homo sapiens | 7.041421 |

|     |        |          |              |          |
|-----|--------|----------|--------------|----------|
| 166 | 55704  | CCDC88A  | Homo sapiens | 7.006685 |
| 167 | 4790   | NFKB1    | Homo sapiens | 6.968999 |
| 168 | 2115   | ETV1     | Homo sapiens | 6.958557 |
| 169 | 4320   | MMP11    | Homo sapiens | 6.912997 |
| 170 | 406931 | MIR139   | Homo sapiens | 6.862791 |
| 171 | 57447  | NDRG2    | Homo sapiens | 6.861141 |
| 172 | 407024 | MIR29B1  | Homo sapiens | 6.821348 |
| 173 | 302    | ANXA2    | Homo sapiens | 6.79961  |
| 174 | 406929 | MIR138-1 | Homo sapiens | 6.725651 |
| 175 | 406988 | MIR205   | Homo sapiens | 6.68752  |
| 176 | 8061   | FOSL1    | Homo sapiens | 6.68752  |
| 177 | 574456 | MIR497   | Homo sapiens | 6.634509 |
| 178 | 214    | ALCAM    | Homo sapiens | 6.465377 |
| 179 | 390    | RND3     | Homo sapiens | 6.38016  |
| 180 | 6868   | ADAM17   | Homo sapiens | 6.376775 |
| 181 | 574411 | MIR451A  | Homo sapiens | 6.289733 |
| 182 | 6304   | SATB1    | Homo sapiens | 6.266575 |
| 183 | 780    | DDR1     | Homo sapiens | 6.252663 |
| 184 | 406947 | MIR155   | Homo sapiens | 6.250332 |
| 185 | 117581 | TWIST2   | Homo sapiens | 6.226705 |
| 186 | 8614   | STC2     | Homo sapiens | 6.127878 |
| 187 | 406999 | MIR217   | Homo sapiens | 6.119768 |
| 188 | 406969 | MIR194-1 | Homo sapiens | 6.119768 |
| 189 | 2050   | EPHB4    | Homo sapiens | 6.013755 |
| 190 | 406989 | MIR206   | Homo sapiens | 5.947932 |
| 191 | 50807  | ASAP1    | Homo sapiens | 5.937972 |
| 192 | 94234  | FOXQ1    | Homo sapiens | 5.927381 |
| 193 | 494324 | MIR375   | Homo sapiens | 5.856482 |
| 194 | 3956   | LGALS1   | Homo sapiens | 5.841407 |
| 195 | 8842   | PROM1    | Homo sapiens | 5.837365 |

|     |        |         |              |          |
|-----|--------|---------|--------------|----------|
| 196 | 9314   | KLF4    | Homo sapiens | 5.789629 |
| 197 | 4319   | MMP10   | Homo sapiens | 5.756291 |
| 198 | 634    | CEACAM1 | Homo sapiens | 5.693478 |
| 199 | 9922   | IQSEC1  | Homo sapiens | 5.683466 |
| 200 | 1793   | DOCK1   | Homo sapiens | 5.647817 |
| 201 | 174    | AFP     | Homo sapiens | 5.55101  |
| 202 | 3589   | IL11    | Homo sapiens | 5.497617 |
| 203 | 407015 | MIR26A1 | Homo sapiens | 5.449901 |
| 204 | 406993 | MIR211  | Homo sapiens | 5.439844 |
| 205 | 407050 | MIR93   | Homo sapiens | 5.422545 |
| 206 | 10276  | NET1    | Homo sapiens | 5.402262 |
| 207 | 406901 | MIR107  | Homo sapiens | 5.402262 |
| 208 | 5584   | PRKCI   | Homo sapiens | 5.391294 |
| 209 | 864    | RUNX3   | Homo sapiens | 5.381679 |
| 210 | 2335   | FN1     | Homo sapiens | 5.370334 |
| 211 | 10395  | DLC1    | Homo sapiens | 5.331209 |
| 212 | 80381  | CD276   | Homo sapiens | 5.323485 |
| 213 | 10763  | NES     | Homo sapiens | 5.282806 |
| 214 | 128209 | KLF17   | Homo sapiens | 5.277343 |
| 215 | 407010 | MIR23A  | Homo sapiens | 5.266445 |
| 216 | 406900 | MIR106B | Homo sapiens | 5.266445 |
| 217 | 64866  | CDCP1   | Homo sapiens | 5.266445 |
| 218 | 25803  | SPDEF   | Homo sapiens | 5.225041 |
| 219 | 9475   | ROCK2   | Homo sapiens | 5.14174  |
| 220 | 4089   | SMAD4   | Homo sapiens | 5.086116 |
| 221 | 406902 | MIR10A  | Homo sapiens | 5.050012 |
| 222 | 11080  | DNAJB4  | Homo sapiens | 5.050012 |
| 223 | 1400   | CRMP1   | Homo sapiens | 5.050012 |
| 224 | 3371   | TNC     | Homo sapiens | 5.005495 |
| 225 | 27022  | FOXD3   | Homo sapiens | 4.980562 |

|     |        |          |              |          |
|-----|--------|----------|--------------|----------|
| 226 | 2119   | ETV5     | Homo sapiens | 4.974341 |
| 227 | 4915   | NTRK2    | Homo sapiens | 4.963022 |
| 228 | 1001   | CDH3     | Homo sapiens | 4.957899 |
| 229 | 407001 | MIR218-2 | Homo sapiens | 4.844367 |
| 230 | 10413  | YAP1     | Homo sapiens | 4.827238 |
| 231 | 8091   | HMGA2    | Homo sapiens | 4.803443 |
| 232 | 407021 | MIR29A   | Homo sapiens | 4.786356 |
| 233 | 406943 | MIR152   | Homo sapiens | 4.777404 |
| 234 | 406976 | MIR199A1 | Homo sapiens | 4.771018 |
| 235 | 23705  | CADM1    | Homo sapiens | 4.765346 |
| 236 | 1364   | CLDN4    | Homo sapiens | 4.7412   |
| 237 | 822    | CAPG     | Homo sapiens | 4.691926 |
| 238 | 5595   | MAPK3    | Homo sapiens | 4.650426 |
| 239 | 723788 | MIG7     | Homo sapiens | 4.649835 |
| 240 | 442918 | MIR373   | Homo sapiens | 4.60389  |
| 241 | 64083  | GOLPH3   | Homo sapiens | 4.601471 |
| 242 | 6548   | SLC9A1   | Homo sapiens | 4.59431  |
| 243 | 6659   | SOX4     | Homo sapiens | 4.59385  |
| 244 | 10298  | PAK4     | Homo sapiens | 4.59385  |
| 245 | 6623   | SNCG     | Homo sapiens | 4.543499 |
| 246 | 407029 | MIR30A   | Homo sapiens | 4.518419 |
| 247 | 102    | ADAM10   | Homo sapiens | 4.512039 |
| 248 | 554210 | MIR429   | Homo sapiens | 4.508486 |
| 249 | 9644   | SH3PXD2A | Homo sapiens | 4.508486 |
| 250 | 57650  | KIAA1524 | Homo sapiens | 4.493878 |
| 251 | 9166   | EBAG9    | Homo sapiens | 4.489103 |
| 252 | 406982 | MIR20A   | Homo sapiens | 4.489103 |
| 253 | 406925 | MIR135A1 | Homo sapiens | 4.475803 |
| 254 | 406971 | MIR195   | Homo sapiens | 4.463543 |
| 255 | 397    | ARHGDIB  | Homo sapiens | 4.458293 |

|     |        |           |              |          |
|-----|--------|-----------|--------------|----------|
| 256 | 3236   | HOXD10    | Homo sapiens | 4.44983  |
| 257 | 574434 | MIR410    | Homo sapiens | 4.441607 |
| 258 | 1012   | CDH13     | Homo sapiens | 4.438936 |
| 259 | 407055 | MIR99A    | Homo sapiens | 4.416415 |
| 260 | 2185   | PTK2B     | Homo sapiens | 4.398556 |
| 261 | 3880   | KRT19     | Homo sapiens | 4.397005 |
| 262 | 114793 | FMNL2     | Homo sapiens | 4.364401 |
| 263 | 6692   | SPINT1    | Homo sapiens | 4.331723 |
| 264 | 51330  | TNFRSF12A | Homo sapiens | 4.330851 |
| 265 | 3921   | RPSA      | Homo sapiens | 4.311075 |
| 266 | 388    | RHOB      | Homo sapiens | 4.258058 |
| 267 | 9048   | ARTN      | Homo sapiens | 4.257955 |
| 268 | 3694   | ITGB6     | Homo sapiens | 4.229513 |
| 269 | 406940 | MIR148A   | Homo sapiens | 4.228797 |
| 270 | 407043 | MIR7-1    | Homo sapiens | 4.226964 |
| 271 | 6657   | SOX2      | Homo sapiens | 4.212101 |
| 272 | 3373   | HYAL1     | Homo sapiens | 4.205571 |
| 273 | 407042 | MIR34C    | Homo sapiens | 4.205571 |
| 274 | 5168   | ENPP2     | Homo sapiens | 4.174488 |
| 275 | 442891 | MIR135B   | Homo sapiens | 4.156082 |
| 276 | 3958   | LGALS3    | Homo sapiens | 4.147597 |
| 277 | 208    | AKT2      | Homo sapiens | 4.136138 |
| 278 | 406979 | MIR19A    | Homo sapiens | 4.087835 |
| 279 | 10553  | HTATIP2   | Homo sapiens | 4.087835 |
| 280 | 57575  | PCDH10    | Homo sapiens | 4.077736 |
| 281 | 494327 | MIR378A   | Homo sapiens | 4.077736 |
| 282 | 25855  | BRMS1     | Homo sapiens | 4.067349 |
| 283 | 3925   | STMN1     | Homo sapiens | 4.049145 |
| 284 | 84299  | MIEN1     | Homo sapiens | 4.042094 |
| 285 | 80310  | PDGFD     | Homo sapiens | 4.020866 |

|     |        |           |              |          |
|-----|--------|-----------|--------------|----------|
| 286 | 6997   | TDGF1     | Homo sapiens | 4.015414 |
| 287 | 84740  | AFAP1-AS1 | Homo sapiens | 4.005745 |
| 288 | 1748   | DLX4      | Homo sapiens | 3.999665 |
| 289 | 406961 | MIR185    | Homo sapiens | 3.999665 |
| 290 | 81839  | VANGL1    | Homo sapiens | 3.96474  |
| 291 | 1474   | CST6      | Homo sapiens | 3.923957 |
| 292 | 10643  | IGF2BP3   | Homo sapiens | 3.923015 |
| 293 | 55740  | ENAH      | Homo sapiens | 3.914209 |
| 294 | 7057   | THBS1     | Homo sapiens | 3.895798 |
| 295 | 64754  | SMYD3     | Homo sapiens | 3.891772 |
| 296 | 4904   | YBX1      | Homo sapiens | 3.889852 |
| 297 | 7593   | MZF1      | Homo sapiens | 3.874696 |
| 298 | 3914   | LAMB3     | Homo sapiens | 3.864893 |
| 299 | 406910 | MIR125A   | Homo sapiens | 3.8574   |
| 300 | 51162  | EGFL7     | Homo sapiens | 3.850493 |
| 301 | 2797   | GNRH2     | Homo sapiens | 3.829518 |
| 302 | 407004 | MIR22     | Homo sapiens | 3.803362 |
| 303 | 574455 | MIR193B   | Homo sapiens | 3.78807  |
| 304 | 407037 | MIR320A   | Homo sapiens | 3.78807  |
| 305 | 694    | BTG1      | Homo sapiens | 3.779162 |
| 306 | 9122   | SLC16A4   | Homo sapiens | 3.709309 |
| 307 | 7033   | TFF3      | Homo sapiens | 3.708979 |
| 308 | 5054   | SERPINE1  | Homo sapiens | 3.700701 |
| 309 | 3037   | HAS2      | Homo sapiens | 3.698391 |
| 310 | 9547   | CXCL14    | Homo sapiens | 3.647394 |
| 311 | 8190   | MIA       | Homo sapiens | 3.642492 |
| 312 | 9232   | PTTG1     | Homo sapiens | 3.641644 |
| 313 | 5918   | RARRES1   | Homo sapiens | 3.605704 |
| 314 | 332    | BIRC5     | Homo sapiens | 3.602816 |
| 315 | 4921   | DDR2      | Homo sapiens | 3.59735  |

|     |        |           |              |          |
|-----|--------|-----------|--------------|----------|
| 316 | 11082  | ESM1      | Homo sapiens | 3.576969 |
| 317 | 7764   | ZNF217    | Homo sapiens | 3.576969 |
| 318 | 6386   | SDCBP     | Homo sapiens | 3.56011  |
| 319 | 10232  | MSLN      | Homo sapiens | 3.558373 |
| 320 | 693210 | MIR625    | Homo sapiens | 3.553478 |
| 321 | 2048   | EPHB2     | Homo sapiens | 3.539078 |
| 322 | 406955 | MIR181B1  | Homo sapiens | 3.513208 |
| 323 | 27076  | LYPD3     | Homo sapiens | 3.509775 |
| 324 | 442906 | MIR338    | Homo sapiens | 3.509775 |
| 325 | 406909 | MIR124-3  | Homo sapiens | 3.509775 |
| 326 | 3491   | CYR61     | Homo sapiens | 3.478649 |
| 327 | 3324   | HSP90AA2P | Homo sapiens | 3.418244 |
| 328 | 1398   | CRK       | Homo sapiens | 3.410513 |
| 329 | 407008 | MIR223    | Homo sapiens | 3.404658 |
| 330 | 6469   | SHH       | Homo sapiens | 3.403953 |
| 331 | 3696   | ITGB8     | Homo sapiens | 3.399161 |
| 332 | 382    | ARF6      | Homo sapiens | 3.397028 |
| 333 | 55272  | IMP3      | Homo sapiens | 3.390667 |
| 334 | 664616 | MIR487B   | Homo sapiens | 3.369587 |
| 335 | 407027 | MIR301A   | Homo sapiens | 3.36702  |
| 336 | 2995   | GYPC      | Homo sapiens | 3.329054 |
| 337 | 406972 | MIR196A1  | Homo sapiens | 3.329054 |
| 338 | 29956  | CERS2     | Homo sapiens | 3.329054 |
| 339 | 3934   | LCN2      | Homo sapiens | 3.316045 |
| 340 | 51147  | ING4      | Homo sapiens | 3.31562  |
| 341 | 5594   | MAPK1     | Homo sapiens | 3.312473 |
| 342 | 2078   | ERG       | Homo sapiens | 3.310772 |
| 343 | 406892 | MIR100    | Homo sapiens | 3.278626 |
| 344 | 1045   | CDX2      | Homo sapiens | 3.273383 |
| 345 | 406914 | MIR127    | Homo sapiens | 3.254939 |



|     |        |          |              |          |
|-----|--------|----------|--------------|----------|
| 346 | 374    | AREG     | Homo sapiens | 3.24908  |
| 347 | 406920 | MIR130B  | Homo sapiens | 3.247044 |
| 348 | 3161   | HMMR     | Homo sapiens | 3.228197 |
| 349 | 1366   | CLDN7    | Homo sapiens | 3.228197 |
| 350 | 407053 | MIR96    | Homo sapiens | 3.218286 |
| 351 | 1009   | CDH11    | Homo sapiens | 3.218286 |
| 352 | 3249   | HPN      | Homo sapiens | 3.218286 |
| 353 | 83998  | REG4     | Homo sapiens | 3.218286 |
| 354 | 10979  | FERMT2   | Homo sapiens | 3.218286 |
| 355 | 406954 | MIR181A2 | Homo sapiens | 3.195422 |
| 356 | 7216   | TRO      | Homo sapiens | 3.195422 |
| 357 | 8826   | IQGAP1   | Homo sapiens | 3.189224 |
| 358 | 2277   | FIGF     | Homo sapiens | 3.186696 |
| 359 | 25805  | BAMBI    | Homo sapiens | 3.166797 |
| 360 | 407012 | MIR24-1  | Homo sapiens | 3.16363  |
| 361 | 406941 | MIR149   | Homo sapiens | 3.16363  |
| 362 | 406894 | MIR101-2 | Homo sapiens | 3.149685 |
| 363 | 23213  | SULF1    | Homo sapiens | 3.137625 |
| 364 | 2303   | FOXC2    | Homo sapiens | 3.137625 |
| 365 | 22943  | DKK1     | Homo sapiens | 3.127957 |
| 366 | 1839   | HBEGF    | Homo sapiens | 3.123133 |
| 367 | 60672  | MIIP     | Homo sapiens | 3.058553 |
| 368 | 406904 | MIR1-1   | Homo sapiens | 3.0582   |
| 369 | 25794  | FSCN2    | Homo sapiens | 3.050544 |
| 370 | 442917 | MIR372   | Homo sapiens | 3.050544 |
| 371 | 8626   | TP63     | Homo sapiens | 3.042269 |
| 372 | 360    | AQP3     | Homo sapiens | 3.027719 |
| 373 | 7471   | WNT1     | Homo sapiens | 3.015178 |
| 374 | 407019 | MIR27B   | Homo sapiens | 3.009794 |
| 375 | 23566  | LPAR3    | Homo sapiens | 3.009794 |

|     |           |          |              |          |
|-----|-----------|----------|--------------|----------|
| 376 | 8838      | WISP3    | Homo sapiens | 3.009794 |
| 377 | 2736      | GLI2     | Homo sapiens | 2.992129 |
| 378 | 5587      | PRKD1    | Homo sapiens | 2.988826 |
| 379 | 5290      | PIK3CA   | Homo sapiens | 2.977318 |
| 380 | 1514      | CTSL     | Homo sapiens | 2.97562  |
| 381 | 9043      | SPAG9    | Homo sapiens | 2.957626 |
| 382 | 1902      | LPAR1    | Homo sapiens | 2.956111 |
| 383 | 56287     | GKN1     | Homo sapiens | 2.944613 |
| 384 | 574506    | MIR503   | Homo sapiens | 2.944613 |
| 385 | 494326    | MIR377   | Homo sapiens | 2.92478  |
| 386 | 100126333 | MIR708   | Homo sapiens | 2.92478  |
| 387 | 2202      | EFEMP1   | Homo sapiens | 2.922451 |
| 388 | 290       | ANPEP    | Homo sapiens | 2.921374 |
| 389 | 406995    | MIR181A1 | Homo sapiens | 2.90905  |
| 390 | 4585      | MUC4     | Homo sapiens | 2.905419 |
| 391 | 101101692 | HELLPAR  | Homo sapiens | 2.900425 |
| 392 | 3309      | HSPA5    | Homo sapiens | 2.893508 |
| 393 | 2532      | ACKR1    | Homo sapiens | 2.890059 |
| 394 | 5732      | PTGER2   | Homo sapiens | 2.890059 |
| 395 | 3146      | HMGB1    | Homo sapiens | 2.871603 |
| 396 | 406997    | MIR215   | Homo sapiens | 2.868259 |
| 397 | 79444     | BIRC7    | Homo sapiens | 2.854708 |
| 398 | 860       | RUNX2    | Homo sapiens | 2.847517 |
| 399 | 5731      | PTGER1   | Homo sapiens | 2.839745 |
| 400 | 3910      | LAMA4    | Homo sapiens | 2.839745 |
| 401 | 2065      | ERBB3    | Homo sapiens | 2.83248  |
| 402 | 7049      | TGFBR3   | Homo sapiens | 2.828583 |
| 403 | 396       | ARHGDIA  | Homo sapiens | 2.828583 |
| 404 | 5909      | RAP1GAP  | Homo sapiens | 2.815119 |
| 405 | 574511    | MIR506   | Homo sapiens | 2.80242  |

|     |        |          |              |          |
|-----|--------|----------|--------------|----------|
| 406 | 406944 | MIR153-1 | Homo sapiens | 2.80242  |
| 407 | 3911   | LAMA5    | Homo sapiens | 2.796483 |
| 408 | 1942   | EFNA1    | Homo sapiens | 2.790416 |
| 409 | 6695   | SPOCK1   | Homo sapiens | 2.784143 |
| 410 | 2022   | ENG      | Homo sapiens | 2.766126 |
| 411 | 406928 | MIR137   | Homo sapiens | 2.75087  |
| 412 | 406977 | MIR199A2 | Homo sapiens | 2.746291 |
| 413 | 2852   | GPER1    | Homo sapiens | 2.720425 |
| 414 | 4478   | MSN      | Homo sapiens | 2.714684 |
| 415 | 3159   | HMGA1    | Homo sapiens | 2.70453  |
| 416 | 406924 | MIR134   | Homo sapiens | 2.704171 |
| 417 | 206338 | LVRN     | Homo sapiens | 2.689804 |
| 418 | 574413 | MIR409   | Homo sapiens | 2.689804 |
| 419 | 406930 | MIR138-2 | Homo sapiens | 2.689804 |
| 420 | 7803   | PTP4A1   | Homo sapiens | 2.68324  |
| 421 | 724025 | MIR655   | Homo sapiens | 2.6608   |
| 422 | 5734   | PTGER4   | Homo sapiens | 2.630793 |
| 423 | 51754  | TMEM8B   | Homo sapiens | 2.627999 |
| 424 | 157310 | PEBP4    | Homo sapiens | 2.627999 |
| 425 | 11178  | LZTS1    | Homo sapiens | 2.627999 |
| 426 | 406899 | MIR106A  | Homo sapiens | 2.625301 |
| 427 | 407018 | MIR27A   | Homo sapiens | 2.601615 |
| 428 | 6241   | RRM2     | Homo sapiens | 2.599595 |
| 429 | 4856   | NOV      | Homo sapiens | 2.599595 |
| 430 | 407036 | MIR32    | Homo sapiens | 2.585605 |
| 431 | 406946 | MIR154   | Homo sapiens | 2.585605 |
| 432 | 29775  | CARD10   | Homo sapiens | 2.567801 |
| 433 | 5294   | PIK3CG   | Homo sapiens | 2.561318 |
| 434 | 8549   | LGR5     | Homo sapiens | 2.558574 |
| 435 | 4311   | MME      | Homo sapiens | 2.548481 |

|     |           |          |              |          |
|-----|-----------|----------|--------------|----------|
| 436 | 9181      | ARHGEF2  | Homo sapiens | 2.527854 |
| 437 | 1365      | CLDN3    | Homo sapiens | 2.527854 |
| 438 | 51176     | LEF1     | Homo sapiens | 2.510096 |
| 439 | 574030    | MIR362   | Homo sapiens | 2.496305 |
| 440 | 84513     | PLPP5    | Homo sapiens | 2.496305 |
| 441 | 26018     | LRIG1    | Homo sapiens | 2.492804 |
| 442 | 7031      | TFF1     | Homo sapiens | 2.489443 |
| 443 | 84651     | SPINK7   | Homo sapiens | 2.48875  |
| 444 | 100033819 | MIR675   | Homo sapiens | 2.48875  |
| 445 | 2012      | EMP1     | Homo sapiens | 2.485881 |
| 446 | 10103     | TSPAN1   | Homo sapiens | 2.485881 |
| 447 | 1890      | TYMP     | Homo sapiens | 2.47975  |
| 448 | 4321      | MMP12    | Homo sapiens | 2.47975  |
| 449 | 928       | CD9      | Homo sapiens | 2.46684  |
| 450 | 27122     | DKK3     | Homo sapiens | 2.464062 |
| 451 | 362       | AQP5     | Homo sapiens | 2.458538 |
| 452 | 406912    | MIR125B2 | Homo sapiens | 2.458269 |
| 453 | 8839      | WISP2    | Homo sapiens | 2.458269 |
| 454 | 574452    | MIR494   | Homo sapiens | 2.458269 |
| 455 | 102723099 | GHET1    | Homo sapiens | 2.433694 |
| 456 | 10163     | WASF2    | Homo sapiens | 2.424752 |
| 457 | 5768      | QSOX1    | Homo sapiens | 2.406051 |
| 458 | 6493      | SIM2     | Homo sapiens | 2.406051 |
| 459 | 9170      | LPAR2    | Homo sapiens | 2.404497 |
| 460 | 6862      | T        | Homo sapiens | 2.404497 |
| 461 | 442909    | MIR342   | Homo sapiens | 2.39836  |
| 462 | 2150      | F2RL1    | Homo sapiens | 2.388111 |
| 463 | 407041    | MIR34B   | Homo sapiens | 2.361921 |
| 464 | 5284      | PIGR     | Homo sapiens | 2.358851 |
| 465 | 56998     | CTNNBIP1 | Homo sapiens | 2.358851 |

|     |        |          |              |          |
|-----|--------|----------|--------------|----------|
| 466 | 406968 | MIR193A  | Homo sapiens | 2.355758 |
| 467 | 406890 | MIRLET7G | Homo sapiens | 2.355758 |
| 468 | 57111  | RAB25    | Homo sapiens | 2.35542  |
| 469 | 9902   | MRC2     | Homo sapiens | 2.35542  |
| 470 | 406970 | MIR194-2 | Homo sapiens | 2.352978 |
| 471 | 693215 | MIR630   | Homo sapiens | 2.352978 |
| 472 | 2296   | FOXC1    | Homo sapiens | 2.344331 |
| 473 | 9219   | MTA2     | Homo sapiens | 2.344331 |
| 474 | 406911 | MIR125B1 | Homo sapiens | 2.326711 |
| 475 | 9353   | SLIT2    | Homo sapiens | 2.320722 |
| 476 | 10653  | SPINT2   | Homo sapiens | 2.320345 |
| 477 | 574453 | MIR495   | Homo sapiens | 2.313706 |
| 478 | 56667  | MUC13    | Homo sapiens | 2.313706 |
| 479 | 11149  | BVES     | Homo sapiens | 2.313706 |
| 480 | 4092   | SMAD7    | Homo sapiens | 2.289219 |
| 481 | 1803   | DPP4     | Homo sapiens | 2.275142 |
| 482 | 79923  | NANOG    | Homo sapiens | 2.261687 |
| 483 | 1495   | CTNNA1   | Homo sapiens | 2.241021 |
| 484 | 5364   | PLXNB1   | Homo sapiens | 2.24005  |
| 485 | 7481   | WNT11    | Homo sapiens | 2.236009 |
| 486 | 4324   | MMP15    | Homo sapiens | 2.236009 |
| 487 | 406966 | MIR191   | Homo sapiens | 2.236009 |
| 488 | 407044 | MIR7-2   | Homo sapiens | 2.234175 |
| 489 | 10551  | AGR2     | Homo sapiens | 2.233378 |
| 490 | 374907 | B3GNT8   | Homo sapiens | 2.226227 |
| 491 | 286205 | SCAI     | Homo sapiens | 2.226227 |
| 492 | 51079  | NDUFA13  | Homo sapiens | 2.223516 |
| 493 | 9077   | DIRAS3   | Homo sapiens | 2.212309 |
| 494 | 5754   | PTK7     | Homo sapiens | 2.212309 |
| 495 | 406992 | MIR210   | Homo sapiens | 2.203982 |

|     |           |          |              |          |
|-----|-----------|----------|--------------|----------|
| 496 | 1462      | VCAN     | Homo sapiens | 2.194625 |
| 497 | 10006     | ABI1     | Homo sapiens | 2.18995  |
| 498 | 599       | BCL2L2   | Homo sapiens | 2.18995  |
| 499 | 6370      | CCL25    | Homo sapiens | 2.179604 |
| 500 | 9423      | NTN1     | Homo sapiens | 2.173615 |
| 501 | 8099      | CDK2AP1  | Homo sapiens | 2.167311 |
| 502 | 23326     | USP22    | Homo sapiens | 2.163347 |
| 503 | 652995    | UCA1     | Homo sapiens | 2.159247 |
| 504 | 407045    | MIR7-3   | Homo sapiens | 2.159247 |
| 505 | 101669767 | SCHLAP1  | Homo sapiens | 2.143023 |
| 506 | 3673      | ITGA2    | Homo sapiens | 2.134016 |
| 507 | 2034      | EPAS1    | Homo sapiens | 2.132863 |
| 508 | 4583      | MUC2     | Homo sapiens | 2.126938 |
| 509 | 406994    | MIR212   | Homo sapiens | 2.12532  |
| 510 | 406884    | MIRLET7B | Homo sapiens | 2.123566 |
| 511 | 10803     | CCR9     | Homo sapiens | 2.123566 |
| 512 | 5641      | LGMN     | Homo sapiens | 2.123566 |
| 513 | 7113      | TMPRSS2  | Homo sapiens | 2.12029  |
| 514 | 693175    | MIR590   | Homo sapiens | 2.112819 |
| 515 | 101867536 | PRNCR1   | Homo sapiens | 2.112819 |
| 516 | 5045      | FURIN    | Homo sapiens | 2.109984 |
| 517 | 23568     | ARL2BP   | Homo sapiens | 2.088478 |
| 518 | 26136     | TES      | Homo sapiens | 2.08102  |
| 519 | 6667      | SP1      | Homo sapiens | 2.080739 |
| 520 | 406915    | MIR128-1 | Homo sapiens | 2.073028 |
| 521 | 56648     | EIF5A2   | Homo sapiens | 2.073028 |
| 522 | 9037      | SEMA5A   | Homo sapiens | 2.073028 |
| 523 | 60495     | HPSE2    | Homo sapiens | 2.073028 |
| 524 | 2444      | FRK      | Homo sapiens | 2.073028 |
| 525 | 6374      | CXCL5    | Homo sapiens | 2.059598 |

|     |        |          |              |          |
|-----|--------|----------|--------------|----------|
| 526 | 2994   | GYPB     | Homo sapiens | 2.039622 |
| 527 | 25937  | WWTR1    | Homo sapiens | 2.031097 |
| 528 | 5460   | POU5F1   | Homo sapiens | 2.030623 |
| 529 | 6525   | SMTN     | Homo sapiens | 2.022612 |
| 530 | 3590   | IL11RA   | Homo sapiens | 2.022612 |
| 531 | 27121  | DKK4     | Homo sapiens | 2.021484 |
| 532 | 64101  | LRRC4    | Homo sapiens | 2.021484 |
| 533 | 7162   | TPBG     | Homo sapiens | 2.021484 |
| 534 | 406918 | MIR129-2 | Homo sapiens | 2.021484 |
| 535 | 407047 | MIR9-2   | Homo sapiens | 2.021484 |
| 536 | 1602   | DACH1    | Homo sapiens | 2.019785 |
| 537 | 8840   | WISP1    | Homo sapiens | 2.019785 |
| 538 | 2919   | CXCL1    | Homo sapiens | 2.01948  |
| 539 | 3791   | KDR      | Homo sapiens | 2.010623 |
| 540 | 50859  | SPOCK3   | Homo sapiens | 2.010382 |
| 541 | 55200  | PLEKHG6  | Homo sapiens | 2.010382 |
| 542 | 494330 | MIR381   | Homo sapiens | 2.010382 |
| 543 | 946    | SIGLEC6  | Homo sapiens | 2.010382 |
| 544 | 442907 | MIR339   | Homo sapiens | 2.010382 |





### List of invadopodia-associated proteins identified using ALS

| Protein name | Aliases                                                                                               | Specie       |
|--------------|-------------------------------------------------------------------------------------------------------|--------------|
| snx9         | sh3pxd3a snx9 mst155 mstp155 sh3px1 wisp                                                              | Homo sapiens |
| wipf2        | wipf2 wich wire                                                                                       | Homo sapiens |
| pdgfb        | pdgf-b flj12858 pdgfb pdgf2 c-sis sis ssv                                                             | Homo sapiens |
| erbb2        | erbb2 her2 her-2 cd340 neu ngl tkr1 her-2/neu                                                         | Homo sapiens |
| glyat        | acgnat gat glyat                                                                                      | Homo sapiens |
| tom1l1       | tom1l1 ok/kns-cl.3 srcasm                                                                             | Homo sapiens |
| tollip       | flj33531 tollip il-1racpip                                                                            | Homo sapiens |
| gdi1         | gdi1 gdil ophn2 xap-4 mrx48 mrx41 rabgdia rabgd1a flj41411 gdi-1                                      | Homo sapiens |
| agfg1        | hrb rab rip mgc116940 mgc116938 dkfzp686i15205 agfg1                                                  | Homo sapiens |
| kiss1r       | gpr54 hot7t175 kiss1r axor12                                                                          | Homo sapiens |
| inf2         | mgc13251 c14orf151 c14orf173 inf2 flj22056 pp9484 dkfzp762a0214                                       | Homo sapiens |
| skap2        | skap-hom mgc33304 prap ra70 skap55r saps skap2 mgc10411 scap2                                         | Homo sapiens |
| s100b        | nef s100beta s100b                                                                                    | Homo sapiens |
| fgr          | c-fgr fgr mgc75096 src2 p58c-fgr p55c-fgr flj43153 c-src2                                             | Homo sapiens |
| abi2         | aip-1 ssh3bp2 abi2b abi-2 ablb3 abi2 argbpia argbpib                                                  | Homo sapiens |
| abi3         | ssh3bp3 abi-3 abi3 nesh                                                                               | Homo sapiens |
| rela         | mgc131774 rela p65 nfkb3                                                                              | Homo sapiens |
| foxa2        | hnf3b tcf3b foxa2 mgc19807                                                                            | Homo sapiens |
| cdx2         | cdx-3 cdx3 cdx2                                                                                       | Homo sapiens |
| nkx2-1       | titf1 nkx2a tcf-1 nkx2-1 nkx2.1 bhc tebp nk-2                                                         | Homo sapiens |
| zeb1         | areb6 zeb1 nil-2-a zfhx1a bzip zeb mgc133261 delta-ef1 tcf8 nil-2a zfhep nil2a                        | Homo sapiens |
| erlin2       | mgc87072 spfh2 erlin-2 c8orf2 erlin2                                                                  | Homo sapiens |
| 3.5.1.4      | deaminase acylamidase 3.5.1.4 fatty acylamidase acylase amidase n-acetylaminohydrolase amidohydrolase | Homo sapiens |
| prl          | prl                                                                                                   | Homo sapiens |
| jak2         | jtk10 jak2                                                                                            | Homo sapiens |
| cdk5rap1     | hspe167 c42 cdk5rap1.4 cdk5rap1.3 cdk5rap1 c20orf34 cgi-05                                            | Homo sapiens |
| cdk5r2       | p39nck5ai nck5ai p39 cdk5r2                                                                           | Homo sapiens |

|          |                                                                                  |              |
|----------|----------------------------------------------------------------------------------|--------------|
| psmc6    | psmc6 cadp44 p42 p44 sug2 mgc12520                                               | Homo sapiens |
| cd40     | mgc9013 p50 cdw40 tnfrsf5 cd40                                                   | Homo sapiens |
| cd80     | cd28lg cd28lg1 cd80 lab7                                                         | Homo sapiens |
| cd86     | mgc34413 cd28lg2 b7-2 b70 cd86 lab72                                             | Homo sapiens |
| tlr4     | cd284 tlr-4 tlr4 toll armd10 htoll                                               | Homo sapiens |
| sp1      | sp1 sp-1                                                                         | Homo sapiens |
| rchy1    | arnip znf363 harnip rchy1 dkfzp586c1620 pro1996 rnf199 pirh2 chimp               | Homo sapiens |
| siah1    | siah-1a humsiah hsiah1 siah1 siah-1                                              | Homo sapiens |
| bmp1     | pcolc pcp-2 pcp tld bmp1 flj44432                                                | Homo sapiens |
| synj1    | synj1 inpp5g                                                                     | Homo sapiens |
| akt3     | pkbg pkb-gamma akt3 dkfzp434n0250 stk-2 rac-pk-gamma rac-gamma prkb              | Homo sapiens |
| akt2     | pkbb akt2 rac-beta pkbbeta prkbb                                                 | Homo sapiens |
| foxo3    | af6q21 foxo3 foxo2 foxo3a dkfzp781a0677 fkhr11p2 fkhr11 mgc31925 mgc12739        | Homo sapiens |
| slc9a3r1 | slc9a3r1 nphlop2 ebp50 nherf1 nherf                                              | Homo sapiens |
| serpinb3 | scca-pd serpinb3 t4-a scc scca-1 scca1 hst1196                                   | Homo sapiens |
| btik     | at mgc126261 mgc126262 imd1 atk bpb btik sla psctk1 agmx1                        | Homo sapiens |
| stim1    | gok d11s4896e stim1                                                              | Homo sapiens |
| orai1    | tmem142a flj14466 orai1 orat1 cracm1                                             | Homo sapiens |
| mylk     | dkfzp686i10125 mylk1 smmlck flj12216 krp mstp083 mlck1 mlck mlck108 mlck210 mylk | Homo sapiens |
| clic1    | g6 ncc27 clic1                                                                   | Homo sapiens |
| fut1     | hh fut1 hsc                                                                      | Homo sapiens |
| ctns     | ctns-lsb ctns pqlc4                                                              | Homo sapiens |
| mirn21   | mir-21 mir21 mirna21 mirn21 hsa-mir-21                                           | Homo sapiens |
| adamts4  | adamts-4 adamts-2 admp-1 kiaa0688 adamts4                                        | Homo sapiens |
| ca5a     | ca5 cav ca5a cava                                                                | Homo sapiens |
| rap1b    | ral1b rap1b k-rev dkfzp586h0723                                                  | Homo sapiens |
| ptk7     | ptk7 cck4                                                                        | Homo sapiens |
| podxl    | pclp podxl gp200 mgc138240                                                       | Homo sapiens |
| smad2    | mgc34440 hmad-2 madh2 madr2 mgc22139 jv18 jv18-1 smad2                           | Homo sapiens |
| hcc      | hcc                                                                              | Homo sapiens |

|          |                                                                                         |              |
|----------|-----------------------------------------------------------------------------------------|--------------|
| pak1     | pak1 pakalpha mgc130001 mgc130000                                                       | Homo sapiens |
| tp63     | ofc8 shfm4 tp53cp ket lms p51 rhs tp53l tp73l tp63 b(p51a) b(p51b) p53cp eec3 p73l p73h | Homo sapiens |
| dmd      | dxs164 dxs142 dxs230 dxs239 dxs270 dxs272 dxs268 dxs269 dxs206 bmd dmd cmd3b            | Homo sapiens |
| bmpr1a   | acvrlk3 10q23del cd292 alk3 bmpr1a                                                      | Homo sapiens |
| bmpr1b   | alk-6 alk6 bmpr1b cdw293                                                                | Homo sapiens |
| bmpr2    | bmpr2 bmpr3 t-alk pph1 bmpr-ii flj41585 bmr2 brk-3 flj76945                             | Homo sapiens |
| smad4    | madh4 jip dpc4 smad4                                                                    | Homo sapiens |
| pdlim5   | l9 enh lim pdlim5 enh1                                                                  | Homo sapiens |
| serpinb2 | pai2 serpinb2 planh2 hst1201 pai-2                                                      | Homo sapiens |
| nts      | nn nmn-125 nts nt/n nts1                                                                | Homo sapiens |
| akr1c4   | 3-alpha-hsd c11 dd4 mgc22581 chdr akr1c4 hakra                                          | Homo sapiens |
| stx12    | stx14 stx13 stx12 mgc51957                                                              | Homo sapiens |
| vav1     | vav vav1                                                                                | Homo sapiens |
| mdm2     | hdm2 hdmx mdm2 mgc71221                                                                 | Homo sapiens |
| skp2     | mgc1366 skp2 fbx11 fbl1 flb1                                                            | Homo sapiens |
| arap3    | arap3 flj21065 centd3 drag1                                                             | Homo sapiens |
| ogt      | ogt mgc22921 o-glcnac hrnt1 flj23071                                                    | Homo sapiens |
| mlc1     | vl lvm mlc mlc1 kiaa0027                                                                | Homo sapiens |
| gmpr     | gmpr gmpr1                                                                              | Homo sapiens |
| fhod1    | fhod1 fhos                                                                              | Homo sapiens |
| muc1     | h23ag cd227 pem pum mam6 muc1                                                           | Homo sapiens |
| xrcc1    | xrcc1 rcc                                                                               | Homo sapiens |
| sts      | es arsc1 asc sts arsc ssdd                                                              | Homo sapiens |
| btg2     | tis21 mgc126063 mgc126064 btg2                                                          | Homo sapiens |
| scn5a    | hbdb iccd hh1 ivf sss1 cdcd2 cmd1e pfhb1 cmpd2 nav1.5 lqt3 scn5a                        | Homo sapiens |
| bsg      | m6 ok 5f7 cd147 bsg tcsf emmprin                                                        | Homo sapiens |
| comp     | psach mgc131819 mgc149768 comp thbs5 edm1 epd1                                          | Homo sapiens |
| nsmaf    | nsmaf fan                                                                               | Homo sapiens |
| braf     | mgc126806 rafb1 braf braf1 flj95109 b-raf1 mgc138284                                    | Homo sapiens |
| swap70   | hspc321 swap70 swap-70 kiaa0640 flj39540                                                | Homo sapiens |

|         |                                                                           |              |
|---------|---------------------------------------------------------------------------|--------------|
| pstpip2 | mgc34175 pstpip2 mayp                                                     | Homo sapiens |
| tbx1    | tbx1c tga tbx1 cafs cthm vcfs dorv                                        | Homo sapiens |
| smad3   | dkfzp586n0721 hspc193 dkfzp686j10186 mgc60396 madh3 hst17436 jv15-2 smad3 | Homo sapiens |
| epgn    | algv3072 epg pro9904 epigen flj75542 epgn                                 | Homo sapiens |
| hmbs    | pbg-d pbgd hmbs ups                                                       | Homo sapiens |
| tnfsf11 | opgl rankl optb2 cd254 trance hrankl2 tnfsf11                             | Homo sapiens |
| nfatc1  | nfatc1 nf-atc nfat2 nfatc mgc138448                                       | Homo sapiens |
| adamts1 | kiaa1346 adamts-1 c3-c5 meth1 adamts1                                     | Homo sapiens |
| ptpn11  | mgc14433 ptp2c ptpn11 cfc ns1 btp3 ptp-1d shp2 sh-ptp3 sh-ptp2            | Homo sapiens |
| hmmr    | ihabp hmmr cd168 rhamm mgc119495 mgc119494                                | Homo sapiens |
| lsp1    | pp52 lsp1 wp34                                                            | Homo sapiens |
| slit2   | slit-2 flj14420 slil3 slit2                                               | Homo sapiens |
| robo1   | dutt1 mgc131599 sax3 mgc133277 flj21882 robo1                             | Homo sapiens |
| npl     | npl c112 mgc61869 mgc149582 c1orf13 npl1                                  | Homo sapiens |
| vangl2  | kiaa1215 stb1 stbm vangl2 stbm1 ltap mgc119404 mgc119403                  | Homo sapiens |
| tfap2a  | tfap2a ap-2 bofs tfap2 ap2tf                                              | Homo sapiens |
| ctsb    | apps cpsb ctsb                                                            | Homo sapiens |
| inpp1   | ship2 inpp1                                                               | Homo sapiens |
| rhog    | mgc125836 mgc125835 rhog arhg                                             | Homo sapiens |
| hgf     | hgfb hpta hgf f-tcf                                                       | Homo sapiens |
| chrna4  | ebn bfnc chrna4 nacra4 flj95812 ebn1 nachr nachra4                        | Homo sapiens |
| il10    | mgc126451 mgc126450 il10 il-10 il10a tgif csif                            | Homo sapiens |
| cdkn1a  | cap20 p21cip1 p21 sdi1 cdkn1 cip1 mda-6 waf1 cdkn1a                       | Homo sapiens |
| tgm2    | gnah g-alpha-h tg2 tgc tgm2                                               | Homo sapiens |
| tgm1    | li icr2 ktg li1 tgk tgm1 tgase                                            | Homo sapiens |
| asf1a   | asf1a hspc146 dkfzp547e2110 cia cgi-98                                    | Homo sapiens |
| pik3r1  | grb1 p85-alpha p85 pik3r1                                                 | Homo sapiens |
| exoc7   | flj46415 yj1085w 2-5-3p dkfzp686j04253 flj40965 ex070 exo70p exoc7 exo70  | Homo sapiens |
| neurog1 | neurod3 neurog1 a.k.a aka math4c bhlha6 ngn1                              | Homo sapiens |
| tgfb1i1 | tgfb1i1 ara55 tsc-5 hic5 hic-5                                            | Homo sapiens |

|         |                                                                              |              |
|---------|------------------------------------------------------------------------------|--------------|
| laspl   | laspl mln50 laspl                                                            | Homo sapiens |
| flna    | flna fln1 opd1 opd2 fln fmd abpx mns opd dkfzp434p031 abp-280 nhbp           | Homo sapiens |
| kras    | c-k-ras rask2 ki-ras kras2 kras1 k-ras4b k-ras4a k-ras2a k-ras2b ns3 kras    | Homo sapiens |
| ralb    | ralb                                                                         | Homo sapiens |
| ralbp1  | ralbp1 rlip76                                                                | Homo sapiens |
| exoc2   | flj11026 sec5 sec5l1 exoc2 sec5p                                             | Homo sapiens |
| exoc8   | exo84p exoc8 exo84 sec84                                                     | Homo sapiens |
| fas     | alps1a fas apt1 tnfrsf6 cd95 fastm apo-1 fas1                                | Homo sapiens |
| tyr     | shep3 tyr oca1a ocaia                                                        | Homo sapiens |
| mt1a    | mt1 mtc mt1a mt1s mgc32848                                                   | Homo sapiens |
| igf2    | c11orf43 insigf igf2 flj22066 pp9974 flj44734                                | Homo sapiens |
| actb    | actb ps1tp5bp1                                                               | Homo sapiens |
| pten    | pten1 pten bzs mmac1 mgc11227 mham                                           | Homo sapiens |
| mapk4   | mapk4 p63mapk erk4 erk3 prkm4                                                | Homo sapiens |
| hspb1   | hmn2b dkfzp586p1322 srp27 hs.76067 cmt2f hsp28 hsp27 hsp25 hspb1             | Homo sapiens |
| tagln   | tagln tagln1 ws3-10 sm22 dkfzp686p11128                                      | Homo sapiens |
| prkaa1  | mgc33776 ampk ampka1 mgc57364 prkaa1                                         | Homo sapiens |
| acaca   | acaca acc acac acc1 acca                                                     | Homo sapiens |
| pc-3    | pc-3 psmp                                                                    | Homo sapiens |
| canx    | flj26570 ip90 cnx p90 canx                                                   | Homo sapiens |
| rps6ka1 | mapkapk1a rsk1 rsk rps6ka1                                                   | Homo sapiens |
| hras    | n-ras rash1 c-bas/has hras c-ha-ras1 k-ras c-h-ras ctlo hras1 hamsv h-rasidx | Homo sapiens |
| myo10   | mgc131988 myo10 flj21066 flj22268 flj43256 kiaa0799 flj10639                 | Homo sapiens |
| mbtps1  | pcsk8 s1p ski-1 mgc138712 mgc138711 mbtps1 kiaa0091                          | Homo sapiens |
| rock1   | p160rock mgc131603 pro0435 mgc43611 rock1                                    | Homo sapiens |
| lpar1   | gpcr26 rec.1.3 mrec1.3 edg-2 lpar1 lpa1 edg2 vzg1 vzg-1                      | Homo sapiens |
| dnajb7  | dnajb7 hsc3 dj5 mgc138340 hsc-3                                              | Homo sapiens |
| egfr    | erbb1 her1 mena egfr pig61 erbb                                              | Homo sapiens |
| tsg101  | tsg10 tsg101 vps23                                                           | Homo sapiens |
| vps4a   | flj22197 vps4 vps4a vps4-1                                                   | Homo sapiens |

|         |                                                                                       |              |
|---------|---------------------------------------------------------------------------------------|--------------|
| cdk5    | pssalre cdk5                                                                          | Homo sapiens |
| pdgfrb  | jtk12 pdgfrb pdgfr1 pdgf-r-beta cd140b pdgfr                                          | Homo sapiens |
| dio3    | d3 dioiii d-3 5diii txdi3 dio3                                                        | Homo sapiens |
| pdk1    | pdk1                                                                                  | Homo sapiens |
| prkg1   | dkfzp686k042 pgk pkg prkgr1b cgki flj36117 cgki-beta prkg1b cgki-alpha prkg1 mgc71944 | Homo sapiens |
| vasp    | vasp                                                                                  | Homo sapiens |
| rln2    | h2 ba12d24.1.1 ba12d24.1.2 rlxh2 rln2                                                 | Homo sapiens |
| timp4   | timp4                                                                                 | Homo sapiens |
| twist1  | twist1 bpes3 bpes2 bhlha38 scs twist                                                  | Homo sapiens |
| itk     | mgc126257 mgc126258 emt itk lyk                                                       | Homo sapiens |
| arhgef2 | dkfzp547p1516 gef-h1 gef lfp40 arhgef2 dkfzp547l106 gefhl kiaa0651                    | Homo sapiens |
| afap112 | xb130 kiaa1914 afap112                                                                | Homo sapiens |
| atp8a2  | ib atp8a2 atpib dkfzp434b1913 atp ml-1                                                | Homo sapiens |
| mirn206 | mir206 mirna206 mirn206 mir-206                                                       | Homo sapiens |
| map2k5  | hst17454 map2k5 mapkk5 mek5 prkmk5                                                    | Homo sapiens |
| axpc1   | pcarp pca axpc1                                                                       | Homo sapiens |
| mapk7   | mapk7 bmk1 erk5 prkm7                                                                 | Homo sapiens |
| rgnef   | kiaa1998 flj21817 rgnef dkfzp686p12164                                                | Homo sapiens |
| tp53    | trp53 flj92943 p53 tp53 lfs1                                                          | Homo sapiens |
| etv5    | erm etv5                                                                              | Homo sapiens |
| hdac9   | hdac9 hdac hdp dkfzp779k1053 hdac9fl hd7 hdac7b hdac9b mitr kiaa0744                  | Homo sapiens |
| prdx2   | nkefb prx2 tsa tdpx1 mgc4104 prdx2 prxii                                              | Homo sapiens |
| tjp1    | dkfzp686m05161 zo-1 mgc133289 tjp1                                                    | Homo sapiens |
| creb1   | mgc9284 creb1 creb                                                                    | Homo sapiens |
| s100p   | mig9 s100p                                                                            | Homo sapiens |
| ptger4  | mgc126583 ptger4 ep4 ep4r                                                             | Homo sapiens |
| limk1   | limk limk1                                                                            | Homo sapiens |
| frap1   | frap raft1 rapt1 frap1 frap2 mtor flj44809                                            | Homo sapiens |
| grb2    | grb2 egfrbp-grb2 ash grb3-3 mst084 mstp084                                            | Homo sapiens |
| nme1    | gaad ndpka awd ndpk-a nm23-h1 nm23 nme1                                               | Homo sapiens |

|         |                                                                                      |              |
|---------|--------------------------------------------------------------------------------------|--------------|
| sgsm3   | dkfzp761d051 sgsm3 rusc3 map rutbc3                                                  | Homo sapiens |
| decr1   | decr1 decr nadph                                                                     | Homo sapiens |
| noxo1   | snx28 sh3pxd5 p41nox p41nox p41noxa mgc20258 noxo1 p41nox                            | Homo sapiens |
| pvr1    | ofc7 pvrr higr hvec cd111 ed4 pvrr1 pvr1 mgc16207 pr sk-12 nectin-1 mgc142031 clped1 | Homo sapiens |
| ros1    | c-ros-1 ros1 ros mcf3                                                                | Homo sapiens |
| itpr1   | ip3r itpr1 sca16 sca15 ip3r1 insp3r1                                                 | Homo sapiens |
| mrvi1   | irag mrvi1 jaw11                                                                     | Homo sapiens |
| kif5b   | kif5b kns kinh kns1 ukhc                                                             | Homo sapiens |
| kif3a   | kif3a                                                                                | Homo sapiens |
| kif3b   | hh0048 kif3b kiaa0359                                                                | Homo sapiens |
| nedd9   | hef1 cas-1 cass2 nedd9 cas2 casl dj49g10.2 dj761i2.1                                 | Homo sapiens |
| enpp2   | lysopld autotaxin flj26803 pdnp2 atx-x atx pd-ialpha enpp2 npp2                      | Homo sapiens |
| rapgef3 | bcm910 mgc21410 camp-gefi rapgef3 hsu79275 epac epac1                                | Homo sapiens |
| aprt    | mgc125856 mgc125857 dkfzp686d13177 amp aprt mgc129961                                | Homo sapiens |
| hspg2   | plc sja sjs sjs1 hspg2 prcan                                                         | Homo sapiens |
| ccr7    | cmkbr7 cd197 blr2 ccr7 cdw197 ebi1                                                   | Homo sapiens |
| mapk14  | rk sapk2a csbp1 csbp2 csbp1 p38 p38alpha mapk14 prkm14 prkm15 mx12 exip              | Homo sapiens |
| golga2  | mgc20672 golga2 gm130                                                                | Homo sapiens |
| grasp   | grasp tamalin                                                                        | Homo sapiens |
| cav1    | vip21 cav-1 cav1 mstp085                                                             | Homo sapiens |
| abi1    | ssh3bp1 abi-1 ssh3bp abi1 e3b1 nap1bp                                                | Homo sapiens |
| id1     | id id1 bhlhb24                                                                       | Homo sapiens |
| nox3    | gp91-3 nox3                                                                          | Homo sapiens |
| cybb    | gp91-1 cgd gp91phox p91-phox cybb gp91-phox nox2                                     | Homo sapiens |
| nox4    | kox-1 kox renox nox4                                                                 | Homo sapiens |
| actn4   | fsgs dkfzp686k23158 actinin-4 actn4 fsgs1                                            | Homo sapiens |
| ifi27   | isg12a isg12 p27 fam14d ifi27                                                        | Homo sapiens |
| cdkn1b  | p27kip1 cdkn4 kip1 men4 men1b cdkn1b                                                 | Homo sapiens |
| nck1    | nck nckalpha nck1 mgc12668                                                           | Homo sapiens |
| nck2    | grb4 nckbeta nck2                                                                    | Homo sapiens |

|            |                                                                                                                                                                                                                        |              |
|------------|------------------------------------------------------------------------------------------------------------------------------------------------------------------------------------------------------------------------|--------------|
| ror2       | bdb ror2 ntrkr2 bdb1 mgc163394                                                                                                                                                                                         | Homo sapiens |
| ncf1       | sh3pxd1a ncf1a p47phox noxo2 ncf1                                                                                                                                                                                      | Homo sapiens |
| rbl2       | flj26459 rbl2 rb2 p130                                                                                                                                                                                                 | Homo sapiens |
| wnt1       | wnt-1 int1 wnt1                                                                                                                                                                                                        | Homo sapiens |
| il6st      | gp130-raps il6r-beta cd130 il6st gp130 cdw130                                                                                                                                                                          | Homo sapiens |
| jun        | c-jun ap1 jun                                                                                                                                                                                                          | Homo sapiens |
| stat3      | hies mgc16063 flj20882 aprf stat3                                                                                                                                                                                      | Homo sapiens |
| 3.6.1.8    | adenosine triphosphate pyrophosphatase atpase atp diphosphohydrolase [ambiguous] atp pyrophosphatase 3.6.1.8 atp diphosphatase                                                                                         | Homo sapiens |
| erbb3      | p45-serbb3 lccs2 erbb3-s erbb3 her3 mda-bf-1 mgc88033 erbb-3 p180-erbb3 c-erbb-3 p85-serbb3 c-erbb3                                                                                                                    | Homo sapiens |
| erbb4      | erbb4 her4 p180erbb4 mgc138404                                                                                                                                                                                         | Homo sapiens |
| nrg1       | ggf2 hrg1 hrga ggf hgl ndf aria smdf nrg-1 nrg1                                                                                                                                                                        | Homo sapiens |
| mapk9      | jnk2b jnk2a jnk-55 sapk mapk9 jnk2 p54asapk jnk2alpha jnk2beta p54a prkm9                                                                                                                                              | Homo sapiens |
| mapk8      | jnk21b1/2 jnk1a2 jnk mapk8 jnk1 sapk1 prkm8                                                                                                                                                                            | Homo sapiens |
| wdtc1      | wdtc1 rp11-4k3__a.1 kiaa1037 adp                                                                                                                                                                                       | Homo sapiens |
| dynammin-2 | dynammin-2 dynammin2                                                                                                                                                                                                   | Homo sapiens |
| fnbp1      | mgc126804 fnbp1 fbp17                                                                                                                                                                                                  | Homo sapiens |
| col9a1     | col9a1 flj40263 med edm6 dj14911.1.2                                                                                                                                                                                   | Homo sapiens |
| gli2       | gli2 hpe9 thp2 thp1 thp-1                                                                                                                                                                                              | Homo sapiens |
| scn8a      | ceriii pn4 nav1.6 scn8a nach6                                                                                                                                                                                          | Homo sapiens |
| csf1       | m-csf csf1 mcsf mgc31930                                                                                                                                                                                               | Homo sapiens |
| rhov       | hg28k cdc4211 rhov arhu wrch1 fj646b12.2 dj646b12.2 flj10616                                                                                                                                                           | Homo sapiens |
| mif        | glif mif mmif                                                                                                                                                                                                          | Homo sapiens |
| slurp1     | mdm anup ly6ls slurp1                                                                                                                                                                                                  | Homo sapiens |
| prkd1      | pkcm pkc-mu pkd prkcm prkd1                                                                                                                                                                                            | Homo sapiens |
| egf        | egf homg4 urg                                                                                                                                                                                                          | Homo sapiens |
| lpa        | lp lpa ak38 apoa                                                                                                                                                                                                       | Homo sapiens |
| 3.1.4.3    | 3.1.4.3 clostridium oedematiens beta- and gamma-toxins clostridium welchii alpha-toxin lipophosphodiesterase i lipophosphodiesterase c lecithinase c phospholipase c heat-labile hemolysin phosphatidase c alpha-toxin | Homo sapiens |
| fzd4       | fz-4 fzd4 fze4 gpcr mgc34390 cd344 fzd4s                                                                                                                                                                               | Homo sapiens |



|          |                                                                                          |              |
|----------|------------------------------------------------------------------------------------------|--------------|
| tktl1    | tktl1 tkr tkl2                                                                           | Homo sapiens |
| npy6r    | pp2 y2b npy6r npy1rl                                                                     | Homo sapiens |
| git1     | git1                                                                                     | Homo sapiens |
| vegfa    | vpf vegfa vegfa mgc70609 vegfa                                                           | Homo sapiens |
| bcar1    | crkas cass1 p130cas cas1 bcar1                                                           | Homo sapiens |
| cse1l    | xpo2 cse1l cas mgc117283 cse1 mgc130037 mgc130036                                        | Homo sapiens |
| hsp90b2p | hspep2 hsgrp94b hsp90b2p hsp tra1p1 grp94b grp94p1                                       | Homo sapiens |
| hspa4    | ry hs24/p52 mgc131852 hsp70ry apg-2 hsp70 hspa4                                          | Homo sapiens |
| hsp90b1  | gp96 grp94 hsp90b1 tra1 ecgp                                                             | Homo sapiens |
| iqgap1   | iqgap1 sar1 humorfa01 kiaa0051 p195                                                      | Homo sapiens |
| arf1     | arf1                                                                                     | Homo sapiens |
| arf5     | arf5                                                                                     | Homo sapiens |
| rhoq     | tc10a rhoq rasl7a arhq tc10                                                              | Homo sapiens |
| rhoj     | tc10b mgc34777 flj14445 rhoj rasl7b tcl arhj                                             | Homo sapiens |
| ptpro    | glepp1 ptpu2 ptpro ptp-u2                                                                | Homo sapiens |
| reg1a    | psps1 psps icrf ptp reg1a mgc12447                                                       | Homo sapiens |
| ptpn6    | hptp1c ptpn6 hcp shp-1 ptp-1c shp1 shp-1l sh-ptp1                                        | Homo sapiens |
| spp1     | eta-1 opn spp1 bspi mgc110940                                                            | Homo sapiens |
| pcsk1    | pcsk1 pc1 pc3 spc3 nec1                                                                  | Homo sapiens |
| mmp19    | rasi-1 mmp-19 mmp18 mmp19                                                                | Homo sapiens |
| mmp1     | clg mmp1 mmp-1                                                                           | Homo sapiens |
| mapk1    | p42mapk p41 mapk2 mapk1 erk2 ert1 prkm2 prkm1 p41mapk                                    | Homo sapiens |
| mrc1     | cd206 clec13d mmr mrc1                                                                   | Homo sapiens |
| ly75     | dec-205 cd205 clec13b gp200-mr6 ly75                                                     | Homo sapiens |
| cdkn2a   | p16ink4a ink4 arf mlm p14 p16 p19 p16ink4 cdk4i cdkn2 tp16 p14arf cmm2 ink4a mts1 cdkn2a | Homo sapiens |
| rasa1    | rasa1 pkws cm-avm rasa dkfzp434n071 gap p120rasgap rasgap cmavm p120gap                  | Homo sapiens |
| adrb2    | adrb2r b2ar bar adrb2r adrb2 beta2ar                                                     | Homo sapiens |
| clathrin | clathrin-hc clathrin                                                                     | Homo sapiens |
| cd2ap    | cd2ap cms dkfzp586h0519                                                                  | Homo sapiens |
| stat5a   | stat5a stat5                                                                             | Homo sapiens |

|           |                                                                                      |              |
|-----------|--------------------------------------------------------------------------------------|--------------|
| ifng      | ifngamma ifng ifg ifi ifn-gamma ifn gamma                                            | Homo sapiens |
| bcr       | bcr-abl1 d22s11 all bcr cml phl flj16453 bcr1 d22s662                                | Homo sapiens |
| actr3     | actr3 arp3                                                                           | Homo sapiens |
| bcatenin  | bcatenin beta catenin beta-catenin                                                   | Homo sapiens |
| hnf4a     | hnf4 hnf4a tcf14 tcf hnf4a9 hnf4a8 hnf4a7 nr2a1 mody nr2a21 flj39654 mody1           | Homo sapiens |
| cad       | cad                                                                                  | Homo sapiens |
| arhgdia   | arhgdia mgc117248 gdia1 rhogdi rhogdi-1                                              | Homo sapiens |
| fermt2    | unc112b kind2 mig-2 flj34213 unc112 plekhc1 mig2 flj44462 fermt2 dkfzp686g11125      | Homo sapiens |
| ilk       | dkfzp686f1765 ilk p59                                                                | Homo sapiens |
| sos1      | ggf1 sos-1 gingf ns4 sos1                                                            | Homo sapiens |
| eps8      | eps8                                                                                 | Homo sapiens |
| irf6      | ofc6 irf6 lps pit pps vws                                                            | Homo sapiens |
| mrxs5     | mrxs5 pgs                                                                            | Homo sapiens |
| tnfa      | tnfalpha tumor-necrosis-factor-alpha tnfa tnf-alpha tnf alpha                        | Homo sapiens |
| nf-kappab | nf-kappab nfkappab nf-kappa b nfkb nfkappa b                                         | Homo sapiens |
| cxcl12    | scyb12 pbsf tlsf-a tlsf-b sdf-1b cxcl12 tpar1 sdf1b sdf1a                            | Homo sapiens |
| cxcr4     | hsy3rr hm89 npyy3r cd184 d2s201e lestr lcr1 npy3r npylr cxcr4 whim fb22              | Homo sapiens |
| mapk3     | mgc20180 p44mapk hs44kdap mapk3 p44erk1 humker1a erk1 prkm3                          | Homo sapiens |
| fos       | c-fos fos ap-1                                                                       | Homo sapiens |
| timp1     | flj90373 timp1 epa hci timp-1 timp clgi                                              | Homo sapiens |
| tgfb      | tgf-beta tgfbeta tgfb                                                                | Homo sapiens |
| vcam1     | vcam-1 dkfzp779g2333 vcam1 cd106 mgc99561 incam-100                                  | Homo sapiens |
| ptprd     | ptpd ptprd hptp hptpd r-ptp-delta hptp-delta mgc119753 mgc119752 mgc119751 mgc119750 | Homo sapiens |
| grlf1     | grf-1 grlf1 kiaa1722 p190a p190rhogap mgc10745 p190-a                                | Homo sapiens |
| dym       | flj90130 dmc dym smc flj20071                                                        | Homo sapiens |
| uts2r     | gpr14 utr utr2 uts2r                                                                 | Homo sapiens |
| cd44      | in hcell ecmr-iii pgp1 cspg8 lhr cdw44 cd44 mgc10468 mc56 mdu3 mdu2 mic4 mutch-i     | Homo sapiens |
| brap      | imp rnf52 brap brap2                                                                 | Homo sapiens |
| sdf1      | sdf-1alpha sdf-1a sdf1 sdf1-alpha sdf-1                                              | Homo sapiens |
| mkks      | hmcs mks bbs6 mkks                                                                   | Homo sapiens |

|          |                                                                                                |              |
|----------|------------------------------------------------------------------------------------------------|--------------|
| gp6      | gpvi gp6 mgc138168                                                                             | Homo sapiens |
| tat      | tat                                                                                            | Homo sapiens |
| 3.6.4.1  | actomyosin myosin atpase 3.6.4.1                                                               | Homo sapiens |
| trpm7    | trpm7 trp-plik flj25718 flj20117 chak ltrpc7 chak1                                             | Homo sapiens |
| myh14    | kiaa2034 myh14 mhc16 dfna4 myosin flj13881 fp17425 dkfzp667a1311 nmhc-ii-c flj43092            | Homo sapiens |
| hsp90aa1 | flj31884 hsp90aa1 hsp89a hsp90a hsp90n hspn hspcal4 hspcal1 lap2 hsp89 hsp86 hsp90 hspca hspc1 | Homo sapiens |
| bhlhb5   | beta3 tnrc20 bhlhe22 bhlhb5 cag185                                                             | Homo sapiens |
| actr2    | actr2 arp2                                                                                     | Homo sapiens |
| afap1    | afap flj56849 afap1 afap-110                                                                   | Homo sapiens |
| pkca     | pkca pkc alpha pkc-alpha pkcalpha                                                              | Homo sapiens |
| ephb2    | pcbc mgc87492 hek5 drt erk tyro5 epht3 ephb2                                                   | Homo sapiens |
| mtg1     | rp11-108k14.2 gtp gtpbp7 mtg1                                                                  | Homo sapiens |
| pik3ca   | pi3k mgc142161 mgc142163 pi3-k pik3ca p110-alpha                                               | Homo sapiens |
| akt1     | pkb-alpha rac-alpha akt akt1 rac mgc99656 prkba                                                | Homo sapiens |
| icam1    | icam-1 bb2 icam1 p3.58 cd54                                                                    | Homo sapiens |
| tnfsf13  | tall2 unq383 pro715 cd256 trdl-1 april tnfsf13 ligand                                          | Homo sapiens |
| dynamin  | dynamin dynamin-1 dynamin1                                                                     | Homo sapiens |
| plau     | plau atf upa urk u-pa urokinase                                                                | Homo sapiens |
| plaur    | plaur cd87 upar urkr                                                                           | Homo sapiens |
| slco6a1  | oatp6a1 gst oatpy slco6a1 mgc26949                                                             | Homo sapiens |
| crkl     | crkl                                                                                           | Homo sapiens |
| tnf      | tnfsf2 dif tnf                                                                                 | Homo sapiens |
| syk      | syk flj37489 flj25043 dkfzp313n1010                                                            | Homo sapiens |
| timp2    | timp2 timp-2 csc-21k                                                                           | Homo sapiens |
| lyn      | flj26625 lyn jtk8                                                                              | Homo sapiens |
| arhgap1  | cdc42gap arhgap1 rhogap1 rhogap p50rhogap                                                      | Homo sapiens |
| cntnap1  | cntnap1 caspr cntnap p190 nrxn4                                                                | Homo sapiens |
| mmp2     | tbe-1 clg4a clg4 mmp-ii mmp2 mona mmp-2                                                        | Homo sapiens |
| il2ra    | il-2ralpha tcgfr il2r il-2r il2ra cd25                                                         | Homo sapiens |
| lox      | lox mgc105112                                                                                  | Homo sapiens |

|       |                                                                                              |              |
|-------|----------------------------------------------------------------------------------------------|--------------|
| itgb2 | lcamb itgb2 cd18 mfl7 mfi7                                                                   | Homo sapiens |
| actin | actin                                                                                        | Homo sapiens |
| pkc   | pkc dyt10                                                                                    | Homo sapiens |
| rhoc  | h9 mgc1448 rhoc h-9 mgc61427 arhc arh9 rhoh9                                                 | Homo sapiens |
| il2   | lymphokine il-2 il2 tcgf                                                                     | Homo sapiens |
| il1b  | il-1 il1b il1f2 il1beta il1-beta il1 beta il-1 beta il-1beta                                 | Homo sapiens |
| cyld  | flj31664 hspc057 eac mft sbs tem flj20180 cdmt uspl2 cyld mft1 kiaa0849 flj78684 cyldi cyld1 | Homo sapiens |
| mmrn1 | ecm mmrn mmrn1 emilin4 gpia*                                                                 | Homo sapiens |

## List of invadopodia-related publications identified using ALS

| Source | Target | PubMed entry                                                                                                                                                                                                                                                                                                                                                                                                                                                                                                                                                                                                                                                                                                                                                                                                                                                                                                                                                                                                                                                                                                                                                                                                                                                                                                                             |
|--------|--------|------------------------------------------------------------------------------------------------------------------------------------------------------------------------------------------------------------------------------------------------------------------------------------------------------------------------------------------------------------------------------------------------------------------------------------------------------------------------------------------------------------------------------------------------------------------------------------------------------------------------------------------------------------------------------------------------------------------------------------------------------------------------------------------------------------------------------------------------------------------------------------------------------------------------------------------------------------------------------------------------------------------------------------------------------------------------------------------------------------------------------------------------------------------------------------------------------------------------------------------------------------------------------------------------------------------------------------------|
| tyrp1  | mmrn1  | <a href="http://www.ncbi.nlm.nih.gov/entrez/query.fcgi?cmd=Retrieve&amp;db=pubmed&amp;dopt=Abstract&amp;list_uids=27591737">http://www.ncbi.nlm.nih.gov/entrez/query.fcgi?cmd=Retrieve&amp;db=pubmed&amp;dopt=Abstract&amp;list_uids=27591737</a>  6 J Cell Physiol   Sep 2016 JOURNAL ARTICLE                                                                                                                                                                                                                                                                                                                                                                                                                                                                                                                                                                                                                                                                                                                                                                                                                                                                                                                                                                                                                                           |
| tyrp1  | actin  | <a href="http://www.ncbi.nlm.nih.gov/entrez/query.fcgi?cmd=Retrieve&amp;db=pubmed&amp;dopt=Abstract&amp;list_uids=27591737">http://www.ncbi.nlm.nih.gov/entrez/query.fcgi?cmd=Retrieve&amp;db=pubmed&amp;dopt=Abstract&amp;list_uids=27591737</a>  6 J Cell Physiol   Sep 2016 JOURNAL ARTICLE                                                                                                                                                                                                                                                                                                                                                                                                                                                                                                                                                                                                                                                                                                                                                                                                                                                                                                                                                                                                                                           |
| mmrn1  | actin  | <a href="http://www.ncbi.nlm.nih.gov/entrez/query.fcgi?cmd=Retrieve&amp;db=pubmed&amp;dopt=Abstract&amp;list_uids=27591737">http://www.ncbi.nlm.nih.gov/entrez/query.fcgi?cmd=Retrieve&amp;db=pubmed&amp;dopt=Abstract&amp;list_uids=27591737</a>  6 J Cell Physiol   Sep 2016 JOURNAL ARTICLE  <a href="http://www.ncbi.nlm.nih.gov/entrez/query.fcgi?cmd=Retrieve&amp;db=pubmed&amp;dopt=Abstract&amp;list_uids=25081617">http://www.ncbi.nlm.nih.gov/entrez/query.fcgi?cmd=Retrieve&amp;db=pubmed&amp;dopt=Abstract&amp;list_uids=25081617</a>  6 Prog Mol Biol Transl Sci 126   2014 Journal Article,Research Support, Non-U.S. Gov't,Review  <a href="http://www.ncbi.nlm.nih.gov/entrez/query.fcgi?cmd=Retrieve&amp;db=pubmed&amp;dopt=Abstract&amp;list_uids=25918420">http://www.ncbi.nlm.nih.gov/entrez/query.fcgi?cmd=Retrieve&amp;db=pubmed&amp;dopt=Abstract&amp;list_uids=25918420</a>  6 Proc Natl Acad Sci U S A 112 19 May 2015 Journal Article,Research Support, N.I.H., Intramural  <a href="http://www.ncbi.nlm.nih.gov/entrez/query.fcgi?cmd=Retrieve&amp;db=pubmed&amp;dopt=Abstract&amp;list_uids=25549589">http://www.ncbi.nlm.nih.gov/entrez/query.fcgi?cmd=Retrieve&amp;db=pubmed&amp;dopt=Abstract&amp;list_uids=25549589</a>  6 Matrix Biol 42  Mar 2015 Journal Article,Research Support, N.I.H., Extramural |
| lims1  | nck2   | <a href="http://www.ncbi.nlm.nih.gov/entrez/query.fcgi?cmd=Retrieve&amp;db=pubmed&amp;dopt=Abstract&amp;list_uids=27590440">http://www.ncbi.nlm.nih.gov/entrez/query.fcgi?cmd=Retrieve&amp;db=pubmed&amp;dopt=Abstract&amp;list_uids=27590440</a>  6 Gene   Aug 2016 REVIEW,JOURNAL ARTICLE                                                                                                                                                                                                                                                                                                                                                                                                                                                                                                                                                                                                                                                                                                                                                                                                                                                                                                                                                                                                                                              |
| lims1  | ilk    | <a href="http://www.ncbi.nlm.nih.gov/entrez/query.fcgi?cmd=Retrieve&amp;db=pubmed&amp;dopt=Abstract&amp;list_uids=27590440">http://www.ncbi.nlm.nih.gov/entrez/query.fcgi?cmd=Retrieve&amp;db=pubmed&amp;dopt=Abstract&amp;list_uids=27590440</a>  6 Gene   Aug 2016 REVIEW,JOURNAL ARTICLE  <a href="http://www.ncbi.nlm.nih.gov/entrez/query.fcgi?cmd=Retrieve&amp;db=pubmed&amp;dopt=Abstract&amp;list_uids=23383235">http://www.ncbi.nlm.nih.gov/entrez/query.fcgi?cmd=Retrieve&amp;db=pubmed&amp;dopt=Abstract&amp;list_uids=23383235</a>  6 PLoS One 8 1  2013 Journal Article,Research Support, N.I.H., Extramural  <a href="http://www.ncbi.nlm.nih.gov/entrez/query.fcgi?cmd=Retrieve&amp;db=pubmed&amp;dopt=Abstract&amp;list_uids=25482629">http://www.ncbi.nlm.nih.gov/entrez/query.fcgi?cmd=Retrieve&amp;db=pubmed&amp;dopt=Abstract&amp;list_uids=25482629</a>  6 Cell Adh Migr 9 3  2015 Journal Article,Research Support, U.S. Gov't, Non-P.H.S.                                                                                                                                                                                                                                                                                                                                                                         |
| lims1  | ipp    | <a href="http://www.ncbi.nlm.nih.gov/entrez/query.fcgi?cmd=Retrieve&amp;db=pubmed&amp;dopt=Abstract&amp;list_uids=27590440">http://www.ncbi.nlm.nih.gov/entrez/query.fcgi?cmd=Retrieve&amp;db=pubmed&amp;dopt=Abstract&amp;list_uids=27590440</a>  6 Gene   Aug 2016 REVIEW,JOURNAL ARTICLE  <a href="http://www.ncbi.nlm.nih.gov/entrez/query.fcgi?cmd=Retrieve&amp;db=pubmed&amp;dopt=Abstract&amp;list_uids=23383235">http://www.ncbi.nlm.nih.gov/entrez/query.fcgi?cmd=Retrieve&amp;db=pubmed&amp;dopt=Abstract&amp;list_uids=23383235</a>  6 PLoS One 8 1  2013 Journal Article,Research Support, N.I.H., Extramural  <a href="http://www.ncbi.nlm.nih.gov/entrez/query.fcgi?cmd=Retrieve&amp;db=pubmed&amp;dopt=Abstract&amp;list_uids=25482629">http://www.ncbi.nlm.nih.gov/entrez/query.fcgi?cmd=Retrieve&amp;db=pubmed&amp;dopt=Abstract&amp;list_uids=25482629</a>  6 Cell Adh Migr 9 3  2015 Journal Article,Research Support, U.S. Gov't, Non-P.H.S.                                                                                                                                                                                                                                                                                                                                                                         |
| nck2   | ilk    | <a href="http://www.ncbi.nlm.nih.gov/entrez/query.fcgi?cmd=Retrieve&amp;db=pubmed&amp;dopt=Abstract&amp;list_uids=27590440">http://www.ncbi.nlm.nih.gov/entrez/query.fcgi?cmd=Retrieve&amp;db=pubmed&amp;dopt=Abstract&amp;list_uids=27590440</a>  6 Gene   Aug 2016 REVIEW,JOURNAL ARTICLE                                                                                                                                                                                                                                                                                                                                                                                                                                                                                                                                                                                                                                                                                                                                                                                                                                                                                                                                                                                                                                              |
| nck2   | ipp    | <a href="http://www.ncbi.nlm.nih.gov/entrez/query.fcgi?cmd=Retrieve&amp;db=pubmed&amp;dopt=Abstract&amp;list_uids=27590440">http://www.ncbi.nlm.nih.gov/entrez/query.fcgi?cmd=Retrieve&amp;db=pubmed&amp;dopt=Abstract&amp;list_uids=27590440</a>  6 Gene   Aug 2016 REVIEW,JOURNAL ARTICLE                                                                                                                                                                                                                                                                                                                                                                                                                                                                                                                                                                                                                                                                                                                                                                                                                                                                                                                                                                                                                                              |
| ilk    | ipp    | <a href="http://www.ncbi.nlm.nih.gov/entrez/query.fcgi?cmd=Retrieve&amp;db=pubmed&amp;dopt=Abstract&amp;list_uids=27590440">http://www.ncbi.nlm.nih.gov/entrez/query.fcgi?cmd=Retrieve&amp;db=pubmed&amp;dopt=Abstract&amp;list_uids=27590440</a>  6 Gene   Aug 2016 REVIEW,JOURNAL ARTICLE  <a href="http://www.ncbi.nlm.nih.gov/entrez/query.fcgi?cmd=Retrieve&amp;db=pubmed&amp;dopt=Abstract&amp;list_uids=23383235">http://www.ncbi.nlm.nih.gov/entrez/query.fcgi?cmd=Retrieve&amp;db=pubmed&amp;dopt=Abstract&amp;list_uids=23383235</a>                                                                                                                                                                                                                                                                                                                                                                                                                                                                                                                                                                                                                                                                                                                                                                                           |

|      |        |                                                                                                                                                                                                                                                                                                                                                                                                                                                                                                                                                                                                                                                                                                                                                                                                                                                                                                                                                                                                                                                                                                                                                                                                                                                                                                                                                                                                                                                     |
|------|--------|-----------------------------------------------------------------------------------------------------------------------------------------------------------------------------------------------------------------------------------------------------------------------------------------------------------------------------------------------------------------------------------------------------------------------------------------------------------------------------------------------------------------------------------------------------------------------------------------------------------------------------------------------------------------------------------------------------------------------------------------------------------------------------------------------------------------------------------------------------------------------------------------------------------------------------------------------------------------------------------------------------------------------------------------------------------------------------------------------------------------------------------------------------------------------------------------------------------------------------------------------------------------------------------------------------------------------------------------------------------------------------------------------------------------------------------------------------|
|      |        | 6 PLoS One 8 1 2013 Journal Article,Research Support, N.I.H., Extramural http://www.ncbi.nlm.nih.gov/entrez/query.fcgi?cmd=Retrieve&db=pubmed&dopt=Abstract&list_uids=25482629 6 Cell Adh Migr 9 3 2015 Journal Article,Research Support, U.S. Gov't, Non-P.H.S.                                                                                                                                                                                                                                                                                                                                                                                                                                                                                                                                                                                                                                                                                                                                                                                                                                                                                                                                                                                                                                                                                                                                                                                    |
| ipp  | mmrn1  | http://www.ncbi.nlm.nih.gov/entrez/query.fcgi?cmd=Retrieve&db=pubmed&dopt=Abstract&list_uids=27590440 6 Gene  Aug 2016 REVIEW,JOURNAL ARTICLE                                                                                                                                                                                                                                                                                                                                                                                                                                                                                                                                                                                                                                                                                                                                                                                                                                                                                                                                                                                                                                                                                                                                                                                                                                                                                                       |
| prl  | nek3   | http://www.ncbi.nlm.nih.gov/entrez/query.fcgi?cmd=Retrieve&db=pubmed&dopt=Abstract&list_uids=27489110 6 J Biol Chem  Aug 2016 JOURNAL ARTICLE                                                                                                                                                                                                                                                                                                                                                                                                                                                                                                                                                                                                                                                                                                                                                                                                                                                                                                                                                                                                                                                                                                                                                                                                                                                                                                       |
| prl  | actin  | http://www.ncbi.nlm.nih.gov/entrez/query.fcgi?cmd=Retrieve&db=pubmed&dopt=Abstract&list_uids=27489110 6 J Biol Chem  Aug 2016 JOURNAL ARTICLE                                                                                                                                                                                                                                                                                                                                                                                                                                                                                                                                                                                                                                                                                                                                                                                                                                                                                                                                                                                                                                                                                                                                                                                                                                                                                                       |
| nek3 | actin  | http://www.ncbi.nlm.nih.gov/entrez/query.fcgi?cmd=Retrieve&db=pubmed&dopt=Abstract&list_uids=27489110 6 J Biol Chem  Aug 2016 JOURNAL ARTICLE                                                                                                                                                                                                                                                                                                                                                                                                                                                                                                                                                                                                                                                                                                                                                                                                                                                                                                                                                                                                                                                                                                                                                                                                                                                                                                       |
| nek3 | mapk3  | http://www.ncbi.nlm.nih.gov/entrez/query.fcgi?cmd=Retrieve&db=pubmed&dopt=Abstract&list_uids=27489110 6 J Biol Chem  Aug 2016 JOURNAL ARTICLE                                                                                                                                                                                                                                                                                                                                                                                                                                                                                                                                                                                                                                                                                                                                                                                                                                                                                                                                                                                                                                                                                                                                                                                                                                                                                                       |
| plp2 | ca4    | http://www.ncbi.nlm.nih.gov/entrez/query.fcgi?cmd=Retrieve&db=pubmed&dopt=Abstract&list_uids=27292568 6 Sci Rep 6  2016 Journal Article                                                                                                                                                                                                                                                                                                                                                                                                                                                                                                                                                                                                                                                                                                                                                                                                                                                                                                                                                                                                                                                                                                                                                                                                                                                                                                             |
| rhoa | rac1   | http://www.ncbi.nlm.nih.gov/entrez/query.fcgi?cmd=Retrieve&db=pubmed&dopt=Abstract&list_uids=27187066 6 PLoS One 11 5 2016 Journal Article http://www.ncbi.nlm.nih.gov/entrez/query.fcgi?cmd=Retrieve&db=pubmed&dopt=Abstract&list_uids=23615439 6 Mol Biol Cell 24 12 Jun 2013 Journal Article,Research Support, N.I.H., Extramural http://www.ncbi.nlm.nih.gov/entrez/query.fcgi?cmd=Retrieve&db=pubmed&dopt=Abstract&list_uids=22634185 6 Cell Signal 24 9 Sep 2012 Journal Article,Research Support, Non-U.S. Gov't http://www.ncbi.nlm.nih.gov/entrez/query.fcgi?cmd=Retrieve&db=pubmed&dopt=Abstract&list_uids=23344455 6 Toxins (Basel) 5 1 Jan 2013 Comparative Study,Journal Article,Research Support, Non-U.S. Gov't http://www.ncbi.nlm.nih.gov/entrez/query.fcgi?cmd=Retrieve&db=pubmed&dopt=Abstract&list_uids=24903274 6 FASEB J 28 9 Sep 2014 Journal Article,Research Support, Non-U.S. Gov't http://www.ncbi.nlm.nih.gov/entrez/query.fcgi?cmd=Retrieve&db=pubmed&dopt=Abstract&list_uids=24675530 6 Carcinogenesis 35 9 Sep 2014 Journal Article,Research Support, Non-U.S. Gov't http://www.ncbi.nlm.nih.gov/entrez/query.fcgi?cmd=Retrieve&db=pubmed&dopt=Abstract&list_uids=22879066 6 Adv Exp Med Biol 986  2013 Journal Article,Review http://www.ncbi.nlm.nih.gov/entrez/query.fcgi?cmd=Retrieve&db=pubmed&dopt=Abstract&list_uids=22721990 6 Cardiovasc Res 95 3 Aug 2012 Journal Article,Research Support, Non-U.S. Gov't |
| rhoa | mbtps1 | http://www.ncbi.nlm.nih.gov/entrez/query.fcgi?cmd=Retrieve&db=pubmed&dopt=Abstract&list_uids=27187066 6 PLoS One 11 5 2016 Journal Article                                                                                                                                                                                                                                                                                                                                                                                                                                                                                                                                                                                                                                                                                                                                                                                                                                                                                                                                                                                                                                                                                                                                                                                                                                                                                                          |
| rac1 | mbtps1 | http://www.ncbi.nlm.nih.gov/entrez/query.fcgi?cmd=Retrieve&db=pubmed&dopt=Abstract&list_uids=27187066 6 PLoS One 11 5 2016 Journal Article                                                                                                                                                                                                                                                                                                                                                                                                                                                                                                                                                                                                                                                                                                                                                                                                                                                                                                                                                                                                                                                                                                                                                                                                                                                                                                          |
| rhoa | gpsn2  | http://www.ncbi.nlm.nih.gov/entrez/query.fcgi?cmd=Retrieve&db=pubmed&dopt=Abstract&list_uids=27187066 6 PLoS                                                                                                                                                                                                                                                                                                                                                                                                                                                                                                                                                                                                                                                                                                                                                                                                                                                                                                                                                                                                                                                                                                                                                                                                                                                                                                                                        |

|        |       |                                                                                                                                                                                                                                                                                                                                                                                                                                                                                                                                                                                                                                                                                                                                                                                                                                                                                                                                                                                                                                                                                                                                                                                                                                                                                                                                                                                                                                                                                                                                                                                                                                                                                                                                                                                                                                                                                                                                                                                                                                                                                                                                                                                                                                                                                                                                                                                                                                                                                                                                                                                                                                                                                                                                                                                                                                                   |
|--------|-------|---------------------------------------------------------------------------------------------------------------------------------------------------------------------------------------------------------------------------------------------------------------------------------------------------------------------------------------------------------------------------------------------------------------------------------------------------------------------------------------------------------------------------------------------------------------------------------------------------------------------------------------------------------------------------------------------------------------------------------------------------------------------------------------------------------------------------------------------------------------------------------------------------------------------------------------------------------------------------------------------------------------------------------------------------------------------------------------------------------------------------------------------------------------------------------------------------------------------------------------------------------------------------------------------------------------------------------------------------------------------------------------------------------------------------------------------------------------------------------------------------------------------------------------------------------------------------------------------------------------------------------------------------------------------------------------------------------------------------------------------------------------------------------------------------------------------------------------------------------------------------------------------------------------------------------------------------------------------------------------------------------------------------------------------------------------------------------------------------------------------------------------------------------------------------------------------------------------------------------------------------------------------------------------------------------------------------------------------------------------------------------------------------------------------------------------------------------------------------------------------------------------------------------------------------------------------------------------------------------------------------------------------------------------------------------------------------------------------------------------------------------------------------------------------------------------------------------------------------|
|        |       | One 11 5  2016 Journal Article                                                                                                                                                                                                                                                                                                                                                                                                                                                                                                                                                                                                                                                                                                                                                                                                                                                                                                                                                                                                                                                                                                                                                                                                                                                                                                                                                                                                                                                                                                                                                                                                                                                                                                                                                                                                                                                                                                                                                                                                                                                                                                                                                                                                                                                                                                                                                                                                                                                                                                                                                                                                                                                                                                                                                                                                                    |
| mbtps1 | gpsn2 | <a href="http://www.ncbi.nlm.nih.gov/entrez/query.fcgi?cmd=Retrieve&amp;db=pubmed&amp;dopt=Abstract&amp;list_uids=27187066">http://www.ncbi.nlm.nih.gov/entrez/query.fcgi?cmd=Retrieve&amp;db=pubmed&amp;dopt=Abstract&amp;list_uids=27187066</a>  6 PLoS One 11 5  2016 Journal Article                                                                                                                                                                                                                                                                                                                                                                                                                                                                                                                                                                                                                                                                                                                                                                                                                                                                                                                                                                                                                                                                                                                                                                                                                                                                                                                                                                                                                                                                                                                                                                                                                                                                                                                                                                                                                                                                                                                                                                                                                                                                                                                                                                                                                                                                                                                                                                                                                                                                                                                                                          |
| myh14  | rhoa  | <a href="http://www.ncbi.nlm.nih.gov/entrez/query.fcgi?cmd=Retrieve&amp;db=pubmed&amp;dopt=Abstract&amp;list_uids=27115795">http://www.ncbi.nlm.nih.gov/entrez/query.fcgi?cmd=Retrieve&amp;db=pubmed&amp;dopt=Abstract&amp;list_uids=27115795</a>  6 Am J Respir Cell Mol Biol  Apr 2016 JOURNAL ARTICLE  <a href="http://www.ncbi.nlm.nih.gov/entrez/query.fcgi?cmd=Retrieve&amp;db=pubmed&amp;dopt=Abstract&amp;list_uids=27187066">http://www.ncbi.nlm.nih.gov/entrez/query.fcgi?cmd=Retrieve&amp;db=pubmed&amp;dopt=Abstract&amp;list_uids=27187066</a>  6 PLoS One 11 5  2016 Journal Article  <a href="http://www.ncbi.nlm.nih.gov/entrez/query.fcgi?cmd=Retrieve&amp;db=pubmed&amp;dopt=Abstract&amp;list_uids=23762409">http://www.ncbi.nlm.nih.gov/entrez/query.fcgi?cmd=Retrieve&amp;db=pubmed&amp;dopt=Abstract&amp;list_uids=23762409</a>  6 P LoS One 8 6  2013 Journal Article,Research Support, N.I.H., Extramural,Research Support, Non-U.S. Gov't  <a href="http://www.ncbi.nlm.nih.gov/entrez/query.fcgi?cmd=Retrieve&amp;db=pubmed&amp;dopt=Abstract&amp;list_uids=23444376">http://www.ncbi.nlm.nih.gov/entrez/query.fcgi?cmd=Retrieve&amp;db=pubmed&amp;dopt=Abstract&amp;list_uids=23444376</a>  6 J Cell Sci 126 Pt 7 Apr 2013 Journal Article,Research Support, Non-U.S. Gov't,Research Support, U.S. Gov't, Non-P.H.S.  <a href="http://www.ncbi.nlm.nih.gov/entrez/query.fcgi?cmd=Retrieve&amp;db=pubmed&amp;dopt=Abstract&amp;list_uids=26906158">http://www.ncbi.nlm.nih.gov/entrez/query.fcgi?cmd=Retrieve&amp;db=pubmed&amp;dopt=Abstract&amp;list_uids=26906158</a>  6 Invest Ophthalmol Vis Sci 57 2 Feb 2016 Journal Article,Research Support, Non-U.S. Gov't  <a href="http://www.ncbi.nlm.nih.gov/entrez/query.fcgi?cmd=Retrieve&amp;db=pubmed&amp;dopt=Abstract&amp;list_uids=25471072">http://www.ncbi.nlm.nih.gov/entrez/query.fcgi?cmd=Retrieve&amp;db=pubmed&amp;dopt=Abstract&amp;list_uids=25471072</a>  6 EMBO J 34 4 Feb 2015 Journal Article,Research Support, Non-U.S. Gov't  <a href="http://www.ncbi.nlm.nih.gov/entrez/query.fcgi?cmd=Retrieve&amp;db=pubmed&amp;dopt=Abstract&amp;list_uids=26483365">http://www.ncbi.nlm.nih.gov/entrez/query.fcgi?cmd=Retrieve&amp;db=pubmed&amp;dopt=Abstract&amp;list_uids=26483365</a>  6 On cotarget 6 31 Oct 2015 Journal Article,Research Support, N.I.H., Extramural                                                                                                                                                                                                                                                                                                                                                                                                                                                                                   |
| mbtps1 | actin | <a href="http://www.ncbi.nlm.nih.gov/entrez/query.fcgi?cmd=Retrieve&amp;db=pubmed&amp;dopt=Abstract&amp;list_uids=27187066">http://www.ncbi.nlm.nih.gov/entrez/query.fcgi?cmd=Retrieve&amp;db=pubmed&amp;dopt=Abstract&amp;list_uids=27187066</a>  6 PLoS One 11 5  2016 Journal Article                                                                                                                                                                                                                                                                                                                                                                                                                                                                                                                                                                                                                                                                                                                                                                                                                                                                                                                                                                                                                                                                                                                                                                                                                                                                                                                                                                                                                                                                                                                                                                                                                                                                                                                                                                                                                                                                                                                                                                                                                                                                                                                                                                                                                                                                                                                                                                                                                                                                                                                                                          |
| rhoa   | actin | <a href="http://www.ncbi.nlm.nih.gov/entrez/query.fcgi?cmd=Retrieve&amp;db=pubmed&amp;dopt=Abstract&amp;list_uids=27187066">http://www.ncbi.nlm.nih.gov/entrez/query.fcgi?cmd=Retrieve&amp;db=pubmed&amp;dopt=Abstract&amp;list_uids=27187066</a>  6 PLoS One 11 5  2016 Journal Article  <a href="http://www.ncbi.nlm.nih.gov/entrez/query.fcgi?cmd=Retrieve&amp;db=pubmed&amp;dopt=Abstract&amp;list_uids=23028669">http://www.ncbi.nlm.nih.gov/entrez/query.fcgi?cmd=Retrieve&amp;db=pubmed&amp;dopt=Abstract&amp;list_uids=23028669</a>  6 P LoS One 7 9  2012 Journal Article,Research Support, N.I.H., Extramural  <a href="http://www.ncbi.nlm.nih.gov/entrez/query.fcgi?cmd=Retrieve&amp;db=pubmed&amp;dopt=Abstract&amp;list_uids=26427649">http://www.ncbi.nlm.nih.gov/entrez/query.fcgi?cmd=Retrieve&amp;db=pubmed&amp;dopt=Abstract&amp;list_uids=26427649</a>  6 Biochim Biophys Acta 1853 12 Dec 2015 Journal Article,Research Support, N.I.H., Extramural  <a href="http://www.ncbi.nlm.nih.gov/entrez/query.fcgi?cmd=Retrieve&amp;db=pubmed&amp;dopt=Abstract&amp;list_uids=24126053">http://www.ncbi.nlm.nih.gov/entrez/query.fcgi?cmd=Retrieve&amp;db=pubmed&amp;dopt=Abstract&amp;list_uids=24126053</a>  6 Mol Cell Biol 33 24 Dec 2013 Journal Article,Research Support, N.I.H., Extramural  <a href="http://www.ncbi.nlm.nih.gov/entrez/query.fcgi?cmd=Retrieve&amp;db=pubmed&amp;dopt=Abstract&amp;list_uids=23716571">http://www.ncbi.nlm.nih.gov/entrez/query.fcgi?cmd=Retrieve&amp;db=pubmed&amp;dopt=Abstract&amp;list_uids=23716571</a>  6 Hum Mol Genet 22 19 Oct 2013 Journal Article,Research Support, Non-U.S. Gov't  <a href="http://www.ncbi.nlm.nih.gov/entrez/query.fcgi?cmd=Retrieve&amp;db=pubmed&amp;dopt=Abstract&amp;list_uids=24675530">http://www.ncbi.nlm.nih.gov/entrez/query.fcgi?cmd=Retrieve&amp;db=pubmed&amp;dopt=Abstract&amp;list_uids=24675530</a>  6 Carcinogenesis 35 9 Sep 2014 Journal Article,Research Support, Non-U.S. Gov't  <a href="http://www.ncbi.nlm.nih.gov/entrez/query.fcgi?cmd=Retrieve&amp;db=pubmed&amp;dopt=Abstract&amp;list_uids=23707396">http://www.ncbi.nlm.nih.gov/entrez/query.fcgi?cmd=Retrieve&amp;db=pubmed&amp;dopt=Abstract&amp;list_uids=23707396</a>  6 Exp Cell Res 319 13 Aug 2013 Journal Article  <a href="http://www.ncbi.nlm.nih.gov/entrez/query.fcgi?cmd=Retrieve&amp;db=pubmed&amp;dopt=Abstract&amp;list_uids=22879066">http://www.ncbi.nlm.nih.gov/entrez/query.fcgi?cmd=Retrieve&amp;db=pubmed&amp;dopt=Abstract&amp;list_uids=22879066</a>  6 Adv Exp Med Biol 986   2013 Journal Article,Review  <a href="http://www.ncbi.nlm.nih.gov/entrez/query.fcgi?cmd=Retrieve&amp;db=pubmed&amp;dopt=Abstract&amp;list_uids=23836">http://www.ncbi.nlm.nih.gov/entrez/query.fcgi?cmd=Retrieve&amp;db=pubmed&amp;dopt=Abstract&amp;list_uids=23836</a> |

|       |       |                                                                                                                                                                                                                                                                                                                                                                                                                                                                                                                                                                                                                                                                                                                                                                                                                                                                                                                                                                                                                                                                                                                                                                                                                                                                                                                                                                                                                                                                                                                                                                                                                                                                                                                                                                                                                                                                                                                                                                                                                                  |
|-------|-------|----------------------------------------------------------------------------------------------------------------------------------------------------------------------------------------------------------------------------------------------------------------------------------------------------------------------------------------------------------------------------------------------------------------------------------------------------------------------------------------------------------------------------------------------------------------------------------------------------------------------------------------------------------------------------------------------------------------------------------------------------------------------------------------------------------------------------------------------------------------------------------------------------------------------------------------------------------------------------------------------------------------------------------------------------------------------------------------------------------------------------------------------------------------------------------------------------------------------------------------------------------------------------------------------------------------------------------------------------------------------------------------------------------------------------------------------------------------------------------------------------------------------------------------------------------------------------------------------------------------------------------------------------------------------------------------------------------------------------------------------------------------------------------------------------------------------------------------------------------------------------------------------------------------------------------------------------------------------------------------------------------------------------------|
|       |       | 527 6 Stem Cells 31 11 Nov 2013 Journal Article,Research Support, N.I.H., Extramural  <a href="http://www.ncbi.nlm.nih.gov/entrez/query.fcgi?cmd=Retrieve&amp;db=pubmed&amp;dopt=Abstract&amp;list_uids=23176180">http://www.ncbi.nlm.nih.gov/entrez/query.fcgi?cmd=Retrieve&amp;db=pubmed&amp;dopt=Abstract&amp;list_uids=23176180</a>  6 BMC Cancer 12  2012 Journal Article,Research Support, Non-U.S. Gov't                                                                                                                                                                                                                                                                                                                                                                                                                                                                                                                                                                                                                                                                                                                                                                                                                                                                                                                                                                                                                                                                                                                                                                                                                                                                                                                                                                                                                                                                                                                                                                                                                  |
| rab5a | rac1  | <a href="http://www.ncbi.nlm.nih.gov/entrez/query.fcgi?cmd=Retrieve&amp;db=pubmed&amp;dopt=Abstract&amp;list_uids=27121131">http://www.ncbi.nlm.nih.gov/entrez/query.fcgi?cmd=Retrieve&amp;db=pubmed&amp;dopt=Abstract&amp;list_uids=27121131</a>  6 Oncotarget 7 20 May 2016 Journal Article                                                                                                                                                                                                                                                                                                                                                                                                                                                                                                                                                                                                                                                                                                                                                                                                                                                                                                                                                                                                                                                                                                                                                                                                                                                                                                                                                                                                                                                                                                                                                                                                                                                                                                                                    |
| rab5a | ptk2  | <a href="http://www.ncbi.nlm.nih.gov/entrez/query.fcgi?cmd=Retrieve&amp;db=pubmed&amp;dopt=Abstract&amp;list_uids=23813952">http://www.ncbi.nlm.nih.gov/entrez/query.fcgi?cmd=Retrieve&amp;db=pubmed&amp;dopt=Abstract&amp;list_uids=23813952</a>  6 J Cell Sci 126 Pt 17 Sep 2013 Journal Article,Research Support, Non-U.S. Gov't  <a href="http://www.ncbi.nlm.nih.gov/entrez/query.fcgi?cmd=Retrieve&amp;db=pubmed&amp;dopt=Abstract&amp;list_uids=27121131">http://www.ncbi.nlm.nih.gov/entrez/query.fcgi?cmd=Retrieve&amp;db=pubmed&amp;dopt=Abstract&amp;list_uids=27121131</a>  6 Oncotarget 7 20 May 2016 Journal Article                                                                                                                                                                                                                                                                                                                                                                                                                                                                                                                                                                                                                                                                                                                                                                                                                                                                                                                                                                                                                                                                                                                                                                                                                                                                                                                                                                                               |
| ptk2  | rac1  | <a href="http://www.ncbi.nlm.nih.gov/entrez/query.fcgi?cmd=Retrieve&amp;db=pubmed&amp;dopt=Abstract&amp;list_uids=25820249">http://www.ncbi.nlm.nih.gov/entrez/query.fcgi?cmd=Retrieve&amp;db=pubmed&amp;dopt=Abstract&amp;list_uids=25820249</a>  6 J Cell Physiol 230 11 Nov 2015 Journal Article,Research Support, Non-U.S. Gov't  <a href="http://www.ncbi.nlm.nih.gov/entrez/query.fcgi?cmd=Retrieve&amp;db=pubmed&amp;dopt=Abstract&amp;list_uids=24858039">http://www.ncbi.nlm.nih.gov/entrez/query.fcgi?cmd=Retrieve&amp;db=pubmed&amp;dopt=Abstract&amp;list_uids=24858039</a>  6 Oncogene 34 15 Apr 2015 Journal Article,Research Support, N.I.H., Extramural,Research Support, Non-U.S. Gov't  <a href="http://www.ncbi.nlm.nih.gov/entrez/query.fcgi?cmd=Retrieve&amp;db=pubmed&amp;dopt=Abstract&amp;list_uids=24480309">http://www.ncbi.nlm.nih.gov/entrez/query.fcgi?cmd=Retrieve&amp;db=pubmed&amp;dopt=Abstract&amp;list_uids=24480309</a>  6 Arch Biochem Biophys 545  Mar 2014 Journal Article,Research Support, Non-U.S. Gov't  <a href="http://www.ncbi.nlm.nih.gov/entrez/query.fcgi?cmd=Retrieve&amp;db=pubmed&amp;dopt=Abstract&amp;list_uids=26299802">http://www.ncbi.nlm.nih.gov/entrez/query.fcgi?cmd=Retrieve&amp;db=pubmed&amp;dopt=Abstract&amp;list_uids=26299802</a>  6 Eur J Cell Biol 94 11 Nov 2015 Journal Article,Research Support, Non-U.S. Gov't  <a href="http://www.ncbi.nlm.nih.gov/entrez/query.fcgi?cmd=Retrieve&amp;db=pubmed&amp;dopt=Abstract&amp;list_uids=27121131">http://www.ncbi.nlm.nih.gov/entrez/query.fcgi?cmd=Retrieve&amp;db=pubmed&amp;dopt=Abstract&amp;list_uids=27121131</a>  6 Oncotarget 7 20 May 2016 Journal Article  <a href="http://www.ncbi.nlm.nih.gov/entrez/query.fcgi?cmd=Retrieve&amp;db=pubmed&amp;dopt=Abstract&amp;list_uids=22721990">http://www.ncbi.nlm.nih.gov/entrez/query.fcgi?cmd=Retrieve&amp;db=pubmed&amp;dopt=Abstract&amp;list_uids=22721990</a>  6 Circ Cardiovasc Res 95 3 Aug 2012 Journal Article,Research Support, Non-U.S. Gov't |
| f2    | il6   | <a href="http://www.ncbi.nlm.nih.gov/entrez/query.fcgi?cmd=Retrieve&amp;db=pubmed&amp;dopt=Abstract&amp;list_uids=27115795">http://www.ncbi.nlm.nih.gov/entrez/query.fcgi?cmd=Retrieve&amp;db=pubmed&amp;dopt=Abstract&amp;list_uids=27115795</a>  6 Am J Respir Cell Mol Biol   Apr 2016 JOURNAL ARTICLE                                                                                                                                                                                                                                                                                                                                                                                                                                                                                                                                                                                                                                                                                                                                                                                                                                                                                                                                                                                                                                                                                                                                                                                                                                                                                                                                                                                                                                                                                                                                                                                                                                                                                                                        |
| f2    | ptk2  | <a href="http://www.ncbi.nlm.nih.gov/entrez/query.fcgi?cmd=Retrieve&amp;db=pubmed&amp;dopt=Abstract&amp;list_uids=27115795">http://www.ncbi.nlm.nih.gov/entrez/query.fcgi?cmd=Retrieve&amp;db=pubmed&amp;dopt=Abstract&amp;list_uids=27115795</a>  6 Am J Respir Cell Mol Biol   Apr 2016 JOURNAL ARTICLE                                                                                                                                                                                                                                                                                                                                                                                                                                                                                                                                                                                                                                                                                                                                                                                                                                                                                                                                                                                                                                                                                                                                                                                                                                                                                                                                                                                                                                                                                                                                                                                                                                                                                                                        |
| f2    | bcar1 | <a href="http://www.ncbi.nlm.nih.gov/entrez/query.fcgi?cmd=Retrieve&amp;db=pubmed&amp;dopt=Abstract&amp;list_uids=27115795">http://www.ncbi.nlm.nih.gov/entrez/query.fcgi?cmd=Retrieve&amp;db=pubmed&amp;dopt=Abstract&amp;list_uids=27115795</a>  6 Am J Respir Cell Mol Biol   Apr 2016 JOURNAL ARTICLE                                                                                                                                                                                                                                                                                                                                                                                                                                                                                                                                                                                                                                                                                                                                                                                                                                                                                                                                                                                                                                                                                                                                                                                                                                                                                                                                                                                                                                                                                                                                                                                                                                                                                                                        |
| il6   | ptk2  | <a href="http://www.ncbi.nlm.nih.gov/entrez/query.fcgi?cmd=Retrieve&amp;db=pubmed&amp;dopt=Abstract&amp;list_uids=27115795">http://www.ncbi.nlm.nih.gov/entrez/query.fcgi?cmd=Retrieve&amp;db=pubmed&amp;dopt=Abstract&amp;list_uids=27115795</a>  6 Am J Respir Cell Mol Biol   Apr 2016 JOURNAL ARTICLE  <a href="http://www.ncbi.nlm.nih.gov/entrez/query.fcgi?cmd=Retrieve&amp;db=pubmed&amp;dopt=Abstract&amp;list_uids=24912675">http://www.ncbi.nlm.nih.gov/entrez/query.fcgi?cmd=Retrieve&amp;db=pubmed&amp;dopt=Abstract&amp;list_uids=24912675</a>  6 Mol Cell Biol 34 16 Aug 2014 Journal Article,Research Support, Non-U.S. Gov't                                                                                                                                                                                                                                                                                                                                                                                                                                                                                                                                                                                                                                                                                                                                                                                                                                                                                                                                                                                                                                                                                                                                                                                                                                                                                                                                                                                    |
| il6   | bcar1 | <a href="http://www.ncbi.nlm.nih.gov/entrez/query.fcgi?cmd=Retrieve&amp;db=pubmed&amp;dopt=Abstract&amp;list_uids=27115795">http://www.ncbi.nlm.nih.gov/entrez/query.fcgi?cmd=Retrieve&amp;db=pubmed&amp;dopt=Abstract&amp;list_uids=27115795</a>  6 Am J Respir Cell Mol Biol   Apr 2016 JOURNAL ARTICLE                                                                                                                                                                                                                                                                                                                                                                                                                                                                                                                                                                                                                                                                                                                                                                                                                                                                                                                                                                                                                                                                                                                                                                                                                                                                                                                                                                                                                                                                                                                                                                                                                                                                                                                        |
| ptk2  | bcar1 | <a href="http://www.ncbi.nlm.nih.gov/entrez/query.fcgi?cmd=Retrieve&amp;db=pubmed&amp;dopt=Abstract&amp;list_uids=27115795">http://www.ncbi.nlm.nih.gov/entrez/query.fcgi?cmd=Retrieve&amp;db=pubmed&amp;dopt=Abstract&amp;list_uids=27115795</a>  6 Am J Respir Cell Mol Biol   Apr 2016 JOURNAL ARTICLE  <a href="http://www.ncbi.nlm.nih.gov/entrez/query.fcgi?cmd=Retrieve&amp;db=pubmed&amp;dopt=Abstract&amp;list_uids=24642576">http://www.ncbi.nlm.nih.gov/entrez/query.fcgi?cmd=Retrieve&amp;db=pubmed&amp;dopt=Abstract&amp;list_uids=24642576</a>                                                                                                                                                                                                                                                                                                                                                                                                                                                                                                                                                                                                                                                                                                                                                                                                                                                                                                                                                                                                                                                                                                                                                                                                                                                                                                                                                                                                                                                                     |



|       |       |                                                                                                                                                                                                                                                                                                                                                                                                                                                                                 |
|-------|-------|---------------------------------------------------------------------------------------------------------------------------------------------------------------------------------------------------------------------------------------------------------------------------------------------------------------------------------------------------------------------------------------------------------------------------------------------------------------------------------|
|       |       | 6 PLoS One 9 3 2014 Journal Article,Research Support, Non-U.S. Gov't http://www.ncbi.nlm.nih.gov/entrez/query.fcgi?cmd=Retrieve&db=pubmed&dopt=Abstract&list_uids=24480309 6 Arch Biochem Biophys 545 Mar 2014 Journal Article,Research Support, Non-U.S. Gov't                                                                                                                                                                                                                 |
| il6   | rhoa  | http://www.ncbi.nlm.nih.gov/entrez/query.fcgi?cmd=Retrieve&db=pubmed&dopt=Abstract&list_uids=27115795 6 Am J Respir Cell Mol Biol   Apr 2016 JOURNAL ARTICLE                                                                                                                                                                                                                                                                                                                    |
| il6   | myh14 | http://www.ncbi.nlm.nih.gov/entrez/query.fcgi?cmd=Retrieve&db=pubmed&dopt=Abstract&list_uids=27115795 6 Am J Respir Cell Mol Biol   Apr 2016 JOURNAL ARTICLE                                                                                                                                                                                                                                                                                                                    |
| il6   | soat1 | http://www.ncbi.nlm.nih.gov/entrez/query.fcgi?cmd=Retrieve&db=pubmed&dopt=Abstract&list_uids=27115795 6 Am J Respir Cell Mol Biol   Apr 2016 JOURNAL ARTICLE                                                                                                                                                                                                                                                                                                                    |
| rhoa  | soat1 | http://www.ncbi.nlm.nih.gov/entrez/query.fcgi?cmd=Retrieve&db=pubmed&dopt=Abstract&list_uids=27115795 6 Am J Respir Cell Mol Biol   Apr 2016 JOURNAL ARTICLE                                                                                                                                                                                                                                                                                                                    |
| myh14 | soat1 | http://www.ncbi.nlm.nih.gov/entrez/query.fcgi?cmd=Retrieve&db=pubmed&dopt=Abstract&list_uids=27115795 6 Am J Respir Cell Mol Biol   Apr 2016 JOURNAL ARTICLE                                                                                                                                                                                                                                                                                                                    |
| dcn   | lum   | http://www.ncbi.nlm.nih.gov/entrez/query.fcgi?cmd=Retrieve&db=pubmed&dopt=Abstract&list_uids=27111714 6 Cell Adh Migr   Apr 2016 JOURNAL ARTICLE                                                                                                                                                                                                                                                                                                                                |
| dcn   | sdc1  | http://www.ncbi.nlm.nih.gov/entrez/query.fcgi?cmd=Retrieve&db=pubmed&dopt=Abstract&list_uids=27111714 6 Cell Adh Migr   Apr 2016 JOURNAL ARTICLE                                                                                                                                                                                                                                                                                                                                |
| dcn   | mrxs5 | http://www.ncbi.nlm.nih.gov/entrez/query.fcgi?cmd=Retrieve&db=pubmed&dopt=Abstract&list_uids=27111714 6 Cell Adh Migr   Apr 2016 JOURNAL ARTICLE                                                                                                                                                                                                                                                                                                                                |
| lum   | sdc1  | http://www.ncbi.nlm.nih.gov/entrez/query.fcgi?cmd=Retrieve&db=pubmed&dopt=Abstract&list_uids=27111714 6 Cell Adh Migr   Apr 2016 JOURNAL ARTICLE                                                                                                                                                                                                                                                                                                                                |
| lum   | mrxs5 | http://www.ncbi.nlm.nih.gov/entrez/query.fcgi?cmd=Retrieve&db=pubmed&dopt=Abstract&list_uids=27111714 6 Cell Adh Migr   Apr 2016 JOURNAL ARTICLE                                                                                                                                                                                                                                                                                                                                |
| sdc1  | mrxs5 | http://www.ncbi.nlm.nih.gov/entrez/query.fcgi?cmd=Retrieve&db=pubmed&dopt=Abstract&list_uids=27111714 6 Cell Adh Migr   Apr 2016 JOURNAL ARTICLE                                                                                                                                                                                                                                                                                                                                |
| cryab | actin | http://www.ncbi.nlm.nih.gov/entrez/query.fcgi?cmd=Retrieve&db=pubmed&dopt=Abstract&list_uids=27107034 6 Reproduction 152 1 Jul 2016 Journal Article                                                                                                                                                                                                                                                                                                                             |
| itk   | ptk2  | http://www.ncbi.nlm.nih.gov/entrez/query.fcgi?cmd=Retrieve&db=pubmed&dopt=Abstract&list_uids=26992741 6 Cancer Lett 375 2 Jun 2016 Journal Article,Research Support, Non-U.S. Gov't http://www.ncbi.nlm.nih.gov/entrez/query.fcgi?cmd=Retrieve&db=pubmed&dopt=Abstract&list_uids=26318800 6 Acta Biomater 27  Nov 2015 Journal Article,Research Support, Non-U.S. Gov't                                                                                                         |
| ptk2  | akt1  | http://www.ncbi.nlm.nih.gov/entrez/query.fcgi?cmd=Retrieve&db=pubmed&dopt=Abstract&list_uids=24635319 6 Biochem J 459 3 May 2014 Journal Article,Research Support, Non-U.S. Gov't http://www.ncbi.nlm.nih.gov/entrez/query.fcgi?cmd=Retrieve&db=pubmed&dopt=Abstract&list_uids=24861878 6 Neuro Oncol 16 9 Sep 2014 Journal Article,Research Support, Non-U.S. Gov't http://www.ncbi.nlm.nih.gov/entrez/query.fcgi?cmd=Retrieve&db=pubmed&dopt=Abstract&list_uids=24194567 6 Mo |

|         |         |                                                                                                                                                                                                                                                                                                                                                                                                                                                                                                                                                                                                                                                                                                                                                                                                                                                                                                                                                                                                                                                                                                                                                                                                                                                                                                                                                                                                                                                                                                                                                                                                                                                                                                                                                |
|---------|---------|------------------------------------------------------------------------------------------------------------------------------------------------------------------------------------------------------------------------------------------------------------------------------------------------------------------------------------------------------------------------------------------------------------------------------------------------------------------------------------------------------------------------------------------------------------------------------------------------------------------------------------------------------------------------------------------------------------------------------------------------------------------------------------------------------------------------------------------------------------------------------------------------------------------------------------------------------------------------------------------------------------------------------------------------------------------------------------------------------------------------------------------------------------------------------------------------------------------------------------------------------------------------------------------------------------------------------------------------------------------------------------------------------------------------------------------------------------------------------------------------------------------------------------------------------------------------------------------------------------------------------------------------------------------------------------------------------------------------------------------------|
|         |         | <p>1 Cancer Ther 13 1 Jan 2014 Journal Article,Research Support, Non-U.S. Gov't <a href="http://www.ncbi.nlm.nih.gov/entrez/query.fcgi?cmd=Retrieve&amp;db=pubmed&amp;dopt=Abstract&amp;list_uids=26988603">http://www.ncbi.nlm.nih.gov/entrez/query.fcgi?cmd=Retrieve&amp;db=pubmed&amp;dopt=Abstract&amp;list_uids=26988603</a> 6 Sci Rep 6   2016 Journal Article,Research Support, Non-U.S. Gov't <a href="http://www.ncbi.nlm.nih.gov/entrez/query.fcgi?cmd=Retrieve&amp;db=pubmed&amp;dopt=Abstract&amp;list_uids=22932395">http://www.ncbi.nlm.nih.gov/entrez/query.fcgi?cmd=Retrieve&amp;db=pubmed&amp;dopt=Abstract&amp;list_uids=22932395</a> 6 FA SEB J 26 12 Dec 2012 Journal Article,Research Support, Non-U.S. Gov't <a href="http://www.ncbi.nlm.nih.gov/entrez/query.fcgi?cmd=Retrieve&amp;db=pubmed&amp;dopt=Abstract&amp;list_uids=26194913">http://www.ncbi.nlm.nih.gov/entrez/query.fcgi?cmd=Retrieve&amp;db=pubmed&amp;dopt=Abstract&amp;list_uids=26194913</a> 6 EM BO Mol Med 7 10 Oct 2015 Journal Article,Research Support, Non-U.S. Gov't <a href="http://www.ncbi.nlm.nih.gov/entrez/query.fcgi?cmd=Retrieve&amp;db=pubmed&amp;dopt=Abstract&amp;list_uids=23836527">http://www.ncbi.nlm.nih.gov/entrez/query.fcgi?cmd=Retrieve&amp;db=pubmed&amp;dopt=Abstract&amp;list_uids=23836527</a> 6 Stem Cells 31 11 Nov 2013 Journal Article,Research Support, N.I.H., Extramural <a href="http://www.ncbi.nlm.nih.gov/entrez/query.fcgi?cmd=Retrieve&amp;db=pubmed&amp;dopt=Abstract&amp;list_uids=22575727">http://www.ncbi.nlm.nih.gov/entrez/query.fcgi?cmd=Retrieve&amp;db=pubmed&amp;dopt=Abstract&amp;list_uids=22575727</a> 6 Gene 503 2 Jul 2012 Journal Article,Research Support, N.I.H., Extramural,Review</p> |
| ppp2r4  | pdlim5  | <a href="http://www.ncbi.nlm.nih.gov/entrez/query.fcgi?cmd=Retrieve&amp;db=pubmed&amp;dopt=Abstract&amp;list_uids=26945059">http://www.ncbi.nlm.nih.gov/entrez/query.fcgi?cmd=Retrieve&amp;db=pubmed&amp;dopt=Abstract&amp;list_uids=26945059</a>  6 J Cell Sci 129 8 Apr 2016 Journal Article,Research Support, Non-U.S. Gov't                                                                                                                                                                                                                                                                                                                                                                                                                                                                                                                                                                                                                                                                                                                                                                                                                                                                                                                                                                                                                                                                                                                                                                                                                                                                                                                                                                                                                |
| ppp2r4  | ppp2r3a | <a href="http://www.ncbi.nlm.nih.gov/entrez/query.fcgi?cmd=Retrieve&amp;db=pubmed&amp;dopt=Abstract&amp;list_uids=26945059">http://www.ncbi.nlm.nih.gov/entrez/query.fcgi?cmd=Retrieve&amp;db=pubmed&amp;dopt=Abstract&amp;list_uids=26945059</a>  6 J Cell Sci 129 8 Apr 2016 Journal Article,Research Support, Non-U.S. Gov't                                                                                                                                                                                                                                                                                                                                                                                                                                                                                                                                                                                                                                                                                                                                                                                                                                                                                                                                                                                                                                                                                                                                                                                                                                                                                                                                                                                                                |
| pdlim5  | ppp2r3a | <a href="http://www.ncbi.nlm.nih.gov/entrez/query.fcgi?cmd=Retrieve&amp;db=pubmed&amp;dopt=Abstract&amp;list_uids=26945059">http://www.ncbi.nlm.nih.gov/entrez/query.fcgi?cmd=Retrieve&amp;db=pubmed&amp;dopt=Abstract&amp;list_uids=26945059</a>  6 J Cell Sci 129 8 Apr 2016 Journal Article,Research Support, Non-U.S. Gov't                                                                                                                                                                                                                                                                                                                                                                                                                                                                                                                                                                                                                                                                                                                                                                                                                                                                                                                                                                                                                                                                                                                                                                                                                                                                                                                                                                                                                |
| pdlim5  | lpp     | <a href="http://www.ncbi.nlm.nih.gov/entrez/query.fcgi?cmd=Retrieve&amp;db=pubmed&amp;dopt=Abstract&amp;list_uids=26945059">http://www.ncbi.nlm.nih.gov/entrez/query.fcgi?cmd=Retrieve&amp;db=pubmed&amp;dopt=Abstract&amp;list_uids=26945059</a>  6 J Cell Sci 129 8 Apr 2016 Journal Article,Research Support, Non-U.S. Gov't                                                                                                                                                                                                                                                                                                                                                                                                                                                                                                                                                                                                                                                                                                                                                                                                                                                                                                                                                                                                                                                                                                                                                                                                                                                                                                                                                                                                                |
| lpp     | ppp2r4  | <a href="http://www.ncbi.nlm.nih.gov/entrez/query.fcgi?cmd=Retrieve&amp;db=pubmed&amp;dopt=Abstract&amp;list_uids=26945059">http://www.ncbi.nlm.nih.gov/entrez/query.fcgi?cmd=Retrieve&amp;db=pubmed&amp;dopt=Abstract&amp;list_uids=26945059</a>  6 J Cell Sci 129 8 Apr 2016 Journal Article,Research Support, Non-U.S. Gov't                                                                                                                                                                                                                                                                                                                                                                                                                                                                                                                                                                                                                                                                                                                                                                                                                                                                                                                                                                                                                                                                                                                                                                                                                                                                                                                                                                                                                |
| lpp     | ppp2r3a | <a href="http://www.ncbi.nlm.nih.gov/entrez/query.fcgi?cmd=Retrieve&amp;db=pubmed&amp;dopt=Abstract&amp;list_uids=26945059">http://www.ncbi.nlm.nih.gov/entrez/query.fcgi?cmd=Retrieve&amp;db=pubmed&amp;dopt=Abstract&amp;list_uids=26945059</a>  6 J Cell Sci 129 8 Apr 2016 Journal Article,Research Support, Non-U.S. Gov't                                                                                                                                                                                                                                                                                                                                                                                                                                                                                                                                                                                                                                                                                                                                                                                                                                                                                                                                                                                                                                                                                                                                                                                                                                                                                                                                                                                                                |
| psma5   | 3.6.4.1 | <a href="http://www.ncbi.nlm.nih.gov/entrez/query.fcgi?cmd=Retrieve&amp;db=pubmed&amp;dopt=Abstract&amp;list_uids=26906158">http://www.ncbi.nlm.nih.gov/entrez/query.fcgi?cmd=Retrieve&amp;db=pubmed&amp;dopt=Abstract&amp;list_uids=26906158</a>  6 Invest Ophthalmol Vis Sci 57 2 Feb 2016 Journal Article,Research Support, Non-U.S. Gov't                                                                                                                                                                                                                                                                                                                                                                                                                                                                                                                                                                                                                                                                                                                                                                                                                                                                                                                                                                                                                                                                                                                                                                                                                                                                                                                                                                                                  |
| psma5   | rhoa    | <a href="http://www.ncbi.nlm.nih.gov/entrez/query.fcgi?cmd=Retrieve&amp;db=pubmed&amp;dopt=Abstract&amp;list_uids=26906158">http://www.ncbi.nlm.nih.gov/entrez/query.fcgi?cmd=Retrieve&amp;db=pubmed&amp;dopt=Abstract&amp;list_uids=26906158</a>  6 Invest Ophthalmol Vis Sci 57 2 Feb 2016 Journal Article,Research Support, Non-U.S. Gov't                                                                                                                                                                                                                                                                                                                                                                                                                                                                                                                                                                                                                                                                                                                                                                                                                                                                                                                                                                                                                                                                                                                                                                                                                                                                                                                                                                                                  |
| 3.6.4.1 | rhoa    | <p><a href="http://www.ncbi.nlm.nih.gov/entrez/query.fcgi?cmd=Retrieve&amp;db=pubmed&amp;dopt=Abstract&amp;list_uids=26906158">http://www.ncbi.nlm.nih.gov/entrez/query.fcgi?cmd=Retrieve&amp;db=pubmed&amp;dopt=Abstract&amp;list_uids=26906158</a> 6 Invest Ophthalmol Vis Sci 57 2 Feb 2016 Journal Article,Research Support, Non-U.S. Gov't <a href="http://www.ncbi.nlm.nih.gov/entrez/query.fcgi?cmd=Retrieve&amp;db=pubmed&amp;dopt=Abstract&amp;list_uids=25526367">http://www.ncbi.nlm.nih.gov/entrez/query.fcgi?cmd=Retrieve&amp;db=pubmed&amp;dopt=Abstract&amp;list_uids=25526367</a> 6 PLoS One 9 12  2014 Journal Article,Research Support, Non-U.S. Gov't</p>                                                                                                                                                                                                                                                                                                                                                                                                                                                                                                                                                                                                                                                                                                                                                                                                                                                                                                                                                                                                                                                                   |
| psma5   | myh14   | <a href="http://www.ncbi.nlm.nih.gov/entrez/query.fcgi?cmd=Retrieve&amp;db=pubmed&amp;dopt=Abstract&amp;list_uids=26906158">http://www.ncbi.nlm.nih.gov/entrez/query.fcgi?cmd=Retrieve&amp;db=pubmed&amp;dopt=Abstract&amp;list_uids=26906158</a>  6 Invest Ophthalmol Vis Sci 57 2 Feb 2016 Journal Article,Research Support, Non-U.S. Gov't                                                                                                                                                                                                                                                                                                                                                                                                                                                                                                                                                                                                                                                                                                                                                                                                                                                                                                                                                                                                                                                                                                                                                                                                                                                                                                                                                                                                  |
| psma5   | mlc1    | <a href="http://www.ncbi.nlm.nih.gov/entrez/query.fcgi?cmd=Retrieve&amp;db=pubmed&amp;dopt=Abstract&amp;list_uids=26906158">http://www.ncbi.nlm.nih.gov/entrez/query.fcgi?cmd=Retrieve&amp;db=pubmed&amp;dopt=Abstract&amp;list_uids=26906158</a>  6 Invest Ophthalmol Vis Sci 57 2 Feb 2016 Journal Article,Research Support, Non-U.S. Gov't                                                                                                                                                                                                                                                                                                                                                                                                                                                                                                                                                                                                                                                                                                                                                                                                                                                                                                                                                                                                                                                                                                                                                                                                                                                                                                                                                                                                  |
| rhoa    | mlc1    | <a href="http://www.ncbi.nlm.nih.gov/entrez/query.fcgi?cmd=Retrieve&amp;db=pubmed&amp;dopt=Abstract&amp;list_uids=26906158">http://www.ncbi.nlm.nih.gov/entrez/query.fcgi?cmd=Retrieve&amp;db=pubmed&amp;dopt=Abstract&amp;list_uids=26906158</a>  6 Invest                                                                                                                                                                                                                                                                                                                                                                                                                                                                                                                                                                                                                                                                                                                                                                                                                                                                                                                                                                                                                                                                                                                                                                                                                                                                                                                                                                                                                                                                                    |

|        |         |                                                                                                                                                                                                                                                                                                                                                                                                                                                                                                                                                                                                                                                                                                                                                                                                                                                                                                                                                                                                                                                                             |
|--------|---------|-----------------------------------------------------------------------------------------------------------------------------------------------------------------------------------------------------------------------------------------------------------------------------------------------------------------------------------------------------------------------------------------------------------------------------------------------------------------------------------------------------------------------------------------------------------------------------------------------------------------------------------------------------------------------------------------------------------------------------------------------------------------------------------------------------------------------------------------------------------------------------------------------------------------------------------------------------------------------------------------------------------------------------------------------------------------------------|
|        |         | Ophthalmol Vis Sci 57 2 Feb 2016 Journal Article,Research Support, Non-U.S. Gov't                                                                                                                                                                                                                                                                                                                                                                                                                                                                                                                                                                                                                                                                                                                                                                                                                                                                                                                                                                                           |
| myh14  | mlc1    | <a href="http://www.ncbi.nlm.nih.gov/entrez/query.fcgi?cmd=Retrieve&amp;db=pubmed&amp;dopt=Abstract&amp;list_uids=22237407">http://www.ncbi.nlm.nih.gov/entrez/query.fcgi?cmd=Retrieve&amp;db=pubmed&amp;dopt=Abstract&amp;list_uids=22237407</a>  6 Am J Physiol Cell Physiol 302 7 Apr 2012 Journal Article,Research Support, N.I.H., Extramural,Research Support, N.I.H., Intramural  <a href="http://www.ncbi.nlm.nih.gov/entrez/query.fcgi?cmd=Retrieve&amp;db=pubmed&amp;dopt=Abstract&amp;list_uids=26906158">http://www.ncbi.nlm.nih.gov/entrez/query.fcgi?cmd=Retrieve&amp;db=pubmed&amp;dopt=Abstract&amp;list_uids=26906158</a>  6 Invest Ophthalmol Vis Sci 57 2 Feb 2016 Journal Article,Research Support, Non-U.S. Gov't  <a href="http://www.ncbi.nlm.nih.gov/entrez/query.fcgi?cmd=Retrieve&amp;db=pubmed&amp;dopt=Abstract&amp;list_uids=24610576">http://www.ncbi.nlm.nih.gov/entrez/query.fcgi?cmd=Retrieve&amp;db=pubmed&amp;dopt=Abstract&amp;list_uids=24610576</a>  6 J Cell Biochem 115 9 Sep 2014 Journal Article,Research Support, Non-U.S. Gov't |
| psma5  | mmrn1   | <a href="http://www.ncbi.nlm.nih.gov/entrez/query.fcgi?cmd=Retrieve&amp;db=pubmed&amp;dopt=Abstract&amp;list_uids=26906158">http://www.ncbi.nlm.nih.gov/entrez/query.fcgi?cmd=Retrieve&amp;db=pubmed&amp;dopt=Abstract&amp;list_uids=26906158</a>  6 Invest Ophthalmol Vis Sci 57 2 Feb 2016 Journal Article,Research Support, Non-U.S. Gov't                                                                                                                                                                                                                                                                                                                                                                                                                                                                                                                                                                                                                                                                                                                               |
| mlc1   | mmrn1   | <a href="http://www.ncbi.nlm.nih.gov/entrez/query.fcgi?cmd=Retrieve&amp;db=pubmed&amp;dopt=Abstract&amp;list_uids=26906158">http://www.ncbi.nlm.nih.gov/entrez/query.fcgi?cmd=Retrieve&amp;db=pubmed&amp;dopt=Abstract&amp;list_uids=26906158</a>  6 Invest Ophthalmol Vis Sci 57 2 Feb 2016 Journal Article,Research Support, Non-U.S. Gov't                                                                                                                                                                                                                                                                                                                                                                                                                                                                                                                                                                                                                                                                                                                               |
| brca1  | nbr1    | <a href="http://www.ncbi.nlm.nih.gov/entrez/query.fcgi?cmd=Retrieve&amp;db=pubmed&amp;dopt=Abstract&amp;list_uids=26903539">http://www.ncbi.nlm.nih.gov/entrez/query.fcgi?cmd=Retrieve&amp;db=pubmed&amp;dopt=Abstract&amp;list_uids=26903539</a>  6 J Cell Biol 212 5 Feb 2016 Journal Article,Research Support, N.I.H., Extramural,Research Support, U.S. Gov't, Non-P.H.S.                                                                                                                                                                                                                                                                                                                                                                                                                                                                                                                                                                                                                                                                                               |
| ndrg1  | ptk2    | <a href="http://www.ncbi.nlm.nih.gov/entrez/query.fcgi?cmd=Retrieve&amp;db=pubmed&amp;dopt=Abstract&amp;list_uids=26895766">http://www.ncbi.nlm.nih.gov/entrez/query.fcgi?cmd=Retrieve&amp;db=pubmed&amp;dopt=Abstract&amp;list_uids=26895766</a>  6 Mol Pharmacol 89 5 May 2016 Journal Article,Research Support, Non-U.S. Gov't                                                                                                                                                                                                                                                                                                                                                                                                                                                                                                                                                                                                                                                                                                                                           |
| cdkn2a | asap1   | <a href="http://www.ncbi.nlm.nih.gov/entrez/query.fcgi?cmd=Retrieve&amp;db=pubmed&amp;dopt=Abstract&amp;list_uids=26893376">http://www.ncbi.nlm.nih.gov/entrez/query.fcgi?cmd=Retrieve&amp;db=pubmed&amp;dopt=Abstract&amp;list_uids=26893376</a>  6 J Biol Chem 291 14 Apr 2016 Journal Article,Research Support, N.I.H., Extramural                                                                                                                                                                                                                                                                                                                                                                                                                                                                                                                                                                                                                                                                                                                                       |
| cdkn2a | myh14   | <a href="http://www.ncbi.nlm.nih.gov/entrez/query.fcgi?cmd=Retrieve&amp;db=pubmed&amp;dopt=Abstract&amp;list_uids=26893376">http://www.ncbi.nlm.nih.gov/entrez/query.fcgi?cmd=Retrieve&amp;db=pubmed&amp;dopt=Abstract&amp;list_uids=26893376</a>  6 J Biol Chem 291 14 Apr 2016 Journal Article,Research Support, N.I.H., Extramural                                                                                                                                                                                                                                                                                                                                                                                                                                                                                                                                                                                                                                                                                                                                       |
| cdkn2a | 3.6.4.1 | <a href="http://www.ncbi.nlm.nih.gov/entrez/query.fcgi?cmd=Retrieve&amp;db=pubmed&amp;dopt=Abstract&amp;list_uids=26893376">http://www.ncbi.nlm.nih.gov/entrez/query.fcgi?cmd=Retrieve&amp;db=pubmed&amp;dopt=Abstract&amp;list_uids=26893376</a>  6 J Biol Chem 291 14 Apr 2016 Journal Article,Research Support, N.I.H., Extramural                                                                                                                                                                                                                                                                                                                                                                                                                                                                                                                                                                                                                                                                                                                                       |
| asap1  | myh14   | <a href="http://www.ncbi.nlm.nih.gov/entrez/query.fcgi?cmd=Retrieve&amp;db=pubmed&amp;dopt=Abstract&amp;list_uids=26893376">http://www.ncbi.nlm.nih.gov/entrez/query.fcgi?cmd=Retrieve&amp;db=pubmed&amp;dopt=Abstract&amp;list_uids=26893376</a>  6 J Biol Chem 291 14 Apr 2016 Journal Article,Research Support, N.I.H., Extramural                                                                                                                                                                                                                                                                                                                                                                                                                                                                                                                                                                                                                                                                                                                                       |
| asap1  | 3.6.4.1 | <a href="http://www.ncbi.nlm.nih.gov/entrez/query.fcgi?cmd=Retrieve&amp;db=pubmed&amp;dopt=Abstract&amp;list_uids=26893376">http://www.ncbi.nlm.nih.gov/entrez/query.fcgi?cmd=Retrieve&amp;db=pubmed&amp;dopt=Abstract&amp;list_uids=26893376</a>  6 J Biol Chem 291 14 Apr 2016 Journal Article,Research Support, N.I.H., Extramural                                                                                                                                                                                                                                                                                                                                                                                                                                                                                                                                                                                                                                                                                                                                       |
| myh14  | 3.6.4.1 | <a href="http://www.ncbi.nlm.nih.gov/entrez/query.fcgi?cmd=Retrieve&amp;db=pubmed&amp;dopt=Abstract&amp;list_uids=25550404">http://www.ncbi.nlm.nih.gov/entrez/query.fcgi?cmd=Retrieve&amp;db=pubmed&amp;dopt=Abstract&amp;list_uids=25550404</a>  6 EMBO Rep 16 2 Feb 2015 Journal Article,Research Support, Non-U.S. Gov't  <a href="http://www.ncbi.nlm.nih.gov/entrez/query.fcgi?cmd=Retrieve&amp;db=pubmed&amp;dopt=Abstract&amp;list_uids=23378028">http://www.ncbi.nlm.nih.gov/entrez/query.fcgi?cmd=Retrieve&amp;db=pubmed&amp;dopt=Abstract&amp;list_uids=23378028</a>  6 J Cell Sci 126 Pt 5 Mar 2013 Journal Article,Research Support, Non-U.S. Gov't  <a href="http://www.ncbi.nlm.nih.gov/entrez/query.fcgi?cmd=Retrieve&amp;db=pubmed&amp;dopt=Abstract&amp;list_uids=26893376">http://www.ncbi.nlm.nih.gov/entrez/query.fcgi?cmd=Retrieve&amp;db=pubmed&amp;dopt=Abstract&amp;list_uids=26893376</a>  6 J Biol Chem 291 14 Apr 2016 Journal Article,Research Support, N.I.H., Extramural                                                                     |
| atf2   | ucp1    | <a href="http://www.ncbi.nlm.nih.gov/entrez/query.fcgi?cmd=Retrieve&amp;db=pubmed&amp;dopt=Abstract&amp;list_uids=26883894">http://www.ncbi.nlm.nih.gov/entrez/query.fcgi?cmd=Retrieve&amp;db=pubmed&amp;dopt=Abstract&amp;list_uids=26883894</a>  6 Sci Rep 6  2016 Journal Article,Research Support, Non-U.S. Gov't                                                                                                                                                                                                                                                                                                                                                                                                                                                                                                                                                                                                                                                                                                                                                       |
| ptk2   | fat     | <a href="http://www.ncbi.nlm.nih.gov/entrez/query.fcgi?cmd=Retrieve&amp;db=pubmed&amp;dopt=Abstract&amp;list_uids=25391654">http://www.ncbi.nlm.nih.gov/entrez/query.fcgi?cmd=Retrieve&amp;db=pubmed&amp;dopt=Abstract&amp;list_uids=25391654</a>  6 J Biol Chem 290 1 Jan 2015 Journal Article,Research Support, Non-U.S. Gov't  <a href="http://www.ncbi.nlm.nih.gov/entrez/query.fcgi?cmd=Retrieve&amp;db=pubmed&amp;dopt=Abstract&amp;list_uids=26866573">http://www.ncbi.nlm.nih.gov/entrez/query.fcgi?cmd=Retrieve&amp;db=pubmed&amp;dopt=Abstract&amp;list_uids=26866573</a>  6 Bio                                                                                                                                                                                                                                                                                                                                                                                                                                                                                  |

|       |       |                                                                                                                                                                                                                                                                                                                                                                                                                                                                                                                                                                                                                                                                                                                                                                                                                                                                                                                                                                                                                                                                                                                                                                                                                                                                                                                                                                                                                                                                                                                                                                                                                                                                                                                                                                                                                                                                                                                                                                                                                                                                                                                                                                                                                                                                                                                                                                                                                                                                                                                                                                                                                                                                                                                                                                                                                                                                                                                                                                                                                                                                                                                                                                                                                                                                                                                                                                                                                                                                                |
|-------|-------|--------------------------------------------------------------------------------------------------------------------------------------------------------------------------------------------------------------------------------------------------------------------------------------------------------------------------------------------------------------------------------------------------------------------------------------------------------------------------------------------------------------------------------------------------------------------------------------------------------------------------------------------------------------------------------------------------------------------------------------------------------------------------------------------------------------------------------------------------------------------------------------------------------------------------------------------------------------------------------------------------------------------------------------------------------------------------------------------------------------------------------------------------------------------------------------------------------------------------------------------------------------------------------------------------------------------------------------------------------------------------------------------------------------------------------------------------------------------------------------------------------------------------------------------------------------------------------------------------------------------------------------------------------------------------------------------------------------------------------------------------------------------------------------------------------------------------------------------------------------------------------------------------------------------------------------------------------------------------------------------------------------------------------------------------------------------------------------------------------------------------------------------------------------------------------------------------------------------------------------------------------------------------------------------------------------------------------------------------------------------------------------------------------------------------------------------------------------------------------------------------------------------------------------------------------------------------------------------------------------------------------------------------------------------------------------------------------------------------------------------------------------------------------------------------------------------------------------------------------------------------------------------------------------------------------------------------------------------------------------------------------------------------------------------------------------------------------------------------------------------------------------------------------------------------------------------------------------------------------------------------------------------------------------------------------------------------------------------------------------------------------------------------------------------------------------------------------------------------------|
|       |       | chemistry 55 9 Mar 2016 Journal Article,Research Support, N.I.H., Extramural,Research Support, U.S. Gov't, Non-P.H.S.  <a href="http://www.ncbi.nlm.nih.gov/entrez/query.fcgi?cmd=Retrieve&amp;db=pubmed&amp;dopt=Abstract&amp;list_uids=25226367">http://www.ncbi.nlm.nih.gov/entrez/query.fcgi?cmd=Retrieve&amp;db=pubmed&amp;dopt=Abstract&amp;list_uids=25226367</a>  6 PLoS One 9 9 2014 Journal Article,Research Support, Non-U.S. Gov't                                                                                                                                                                                                                                                                                                                                                                                                                                                                                                                                                                                                                                                                                                                                                                                                                                                                                                                                                                                                                                                                                                                                                                                                                                                                                                                                                                                                                                                                                                                                                                                                                                                                                                                                                                                                                                                                                                                                                                                                                                                                                                                                                                                                                                                                                                                                                                                                                                                                                                                                                                                                                                                                                                                                                                                                                                                                                                                                                                                                                                 |
| ptk2  | ptk2b | <a href="http://www.ncbi.nlm.nih.gov/entrez/query.fcgi?cmd=Retrieve&amp;db=pubmed&amp;dopt=Abstract&amp;list_uids=24290759">http://www.ncbi.nlm.nih.gov/entrez/query.fcgi?cmd=Retrieve&amp;db=pubmed&amp;dopt=Abstract&amp;list_uids=24290759</a>  6 Cell Rep 5 5 Dec 2013 Journal Article,Research Support, Non-U.S. Gov't  <a href="http://www.ncbi.nlm.nih.gov/entrez/query.fcgi?cmd=Retrieve&amp;db=pubmed&amp;dopt=Abstract&amp;list_uids=22859931">http://www.ncbi.nlm.nih.gov/entrez/query.fcgi?cmd=Retrieve&amp;db=pubmed&amp;dopt=Abstract&amp;list_uids=22859931</a>  6 PLoS One 7 6 2012 Journal Article,Research Support, N.I.H., Extramural,Research Support, Non-U.S. Gov't  <a href="http://www.ncbi.nlm.nih.gov/entrez/query.fcgi?cmd=Retrieve&amp;db=pubmed&amp;dopt=Abstract&amp;list_uids=26866573">http://www.ncbi.nlm.nih.gov/entrez/query.fcgi?cmd=Retrieve&amp;db=pubmed&amp;dopt=Abstract&amp;list_uids=26866573</a>  6 Biochemistry 55 9 Mar 2016 Journal Article,Research Support, N.I.H., Extramural,Research Support, U.S. Gov't, Non-P.H.S.  <a href="http://www.ncbi.nlm.nih.gov/entrez/query.fcgi?cmd=Retrieve&amp;db=pubmed&amp;dopt=Abstract&amp;list_uids=25475728">http://www.ncbi.nlm.nih.gov/entrez/query.fcgi?cmd=Retrieve&amp;db=pubmed&amp;dopt=Abstract&amp;list_uids=25475728</a>  6 Biochem Biophys Res Commun 459 1 Mar 2015 Journal Article,Research Support, Non-U.S. Gov't                                                                                                                                                                                                                                                                                                                                                                                                                                                                                                                                                                                                                                                                                                                                                                                                                                                                                                                                                                                                                                                                                                                                                                                                                                                                                                                                                                                                                                                                                                                                                                                                                                                                                                                                                                                                                                                                                                                                                                                                                                                      |
| fat   | ptk2b | <a href="http://www.ncbi.nlm.nih.gov/entrez/query.fcgi?cmd=Retrieve&amp;db=pubmed&amp;dopt=Abstract&amp;list_uids=26866573">http://www.ncbi.nlm.nih.gov/entrez/query.fcgi?cmd=Retrieve&amp;db=pubmed&amp;dopt=Abstract&amp;list_uids=26866573</a>  6 Biochemistry 55 9 Mar 2016 Journal Article,Research Support, N.I.H., Extramural,Research Support, U.S. Gov't, Non-P.H.S.                                                                                                                                                                                                                                                                                                                                                                                                                                                                                                                                                                                                                                                                                                                                                                                                                                                                                                                                                                                                                                                                                                                                                                                                                                                                                                                                                                                                                                                                                                                                                                                                                                                                                                                                                                                                                                                                                                                                                                                                                                                                                                                                                                                                                                                                                                                                                                                                                                                                                                                                                                                                                                                                                                                                                                                                                                                                                                                                                                                                                                                                                                  |
| stat3 | tns4  | <a href="http://www.ncbi.nlm.nih.gov/entrez/query.fcgi?cmd=Retrieve&amp;db=pubmed&amp;dopt=Abstract&amp;list_uids=26852686">http://www.ncbi.nlm.nih.gov/entrez/query.fcgi?cmd=Retrieve&amp;db=pubmed&amp;dopt=Abstract&amp;list_uids=26852686</a>  6 Int J Exp Pathol 96 6 Dec 2015 Journal Article,Research Support, Non-U.S. Gov't                                                                                                                                                                                                                                                                                                                                                                                                                                                                                                                                                                                                                                                                                                                                                                                                                                                                                                                                                                                                                                                                                                                                                                                                                                                                                                                                                                                                                                                                                                                                                                                                                                                                                                                                                                                                                                                                                                                                                                                                                                                                                                                                                                                                                                                                                                                                                                                                                                                                                                                                                                                                                                                                                                                                                                                                                                                                                                                                                                                                                                                                                                                                           |
| src   | ptk2  | <a href="http://www.ncbi.nlm.nih.gov/entrez/query.fcgi?cmd=Retrieve&amp;db=pubmed&amp;dopt=Abstract&amp;list_uids=22665056">http://www.ncbi.nlm.nih.gov/entrez/query.fcgi?cmd=Retrieve&amp;db=pubmed&amp;dopt=Abstract&amp;list_uids=22665056</a>  6 Oncogene 32 14 Apr 2013 Journal Article,Research Support, Non-U.S. Gov't  <a href="http://www.ncbi.nlm.nih.gov/entrez/query.fcgi?cmd=Retrieve&amp;db=pubmed&amp;dopt=Abstract&amp;list_uids=25049397">http://www.ncbi.nlm.nih.gov/entrez/query.fcgi?cmd=Retrieve&amp;db=pubmed&amp;dopt=Abstract&amp;list_uids=25049397</a>  6 Proc Natl Acad Sci U S A 111 31 Aug 2014 Journal Article,Research Support, Non-U.S. Gov't  <a href="http://www.ncbi.nlm.nih.gov/entrez/query.fcgi?cmd=Retrieve&amp;db=pubmed&amp;dopt=Abstract&amp;list_uids=22488171">http://www.ncbi.nlm.nih.gov/entrez/query.fcgi?cmd=Retrieve&amp;db=pubmed&amp;dopt=Abstract&amp;list_uids=22488171</a>  6 J Cancer Res Clin Oncol 138 8 Aug 2012 Journal Article  <a href="http://www.ncbi.nlm.nih.gov/entrez/query.fcgi?cmd=Retrieve&amp;db=pubmed&amp;dopt=Abstract&amp;list_uids=26079101">http://www.ncbi.nlm.nih.gov/entrez/query.fcgi?cmd=Retrieve&amp;db=pubmed&amp;dopt=Abstract&amp;list_uids=26079101</a>  6 Biochim Biophys Acta 1853 10 Pt A Oct 2015 Journal Article,Research Support, Non-U.S. Gov't  <a href="http://www.ncbi.nlm.nih.gov/entrez/query.fcgi?cmd=Retrieve&amp;db=pubmed&amp;dopt=Abstract&amp;list_uids=23754369">http://www.ncbi.nlm.nih.gov/entrez/query.fcgi?cmd=Retrieve&amp;db=pubmed&amp;dopt=Abstract&amp;list_uids=23754369</a>  6 Proc Natl Acad Sci U S A 110 26 Jun 2013 Journal Article,Research Support, N.I.H., Intramural,Research Support, Non-U.S. Gov't  <a href="http://www.ncbi.nlm.nih.gov/entrez/query.fcgi?cmd=Retrieve&amp;db=pubmed&amp;dopt=Abstract&amp;list_uids=22900044">http://www.ncbi.nlm.nih.gov/entrez/query.fcgi?cmd=Retrieve&amp;db=pubmed&amp;dopt=Abstract&amp;list_uids=22900044</a>  6 PLoS One 7 8 2012 Journal Article,Research Support, N.I.H., Extramural,Research Support, Non-U.S. Gov't,Research Support, U.S. Gov't, Non-P.H.S.  <a href="http://www.ncbi.nlm.nih.gov/entrez/query.fcgi?cmd=Retrieve&amp;db=pubmed&amp;dopt=Abstract&amp;list_uids=22287273">http://www.ncbi.nlm.nih.gov/entrez/query.fcgi?cmd=Retrieve&amp;db=pubmed&amp;dopt=Abstract&amp;list_uids=22287273</a>  6 J Cell Physiol 227 11 Nov 2012 Journal Article,Research Support, N.I.H., Extramural  <a href="http://www.ncbi.nlm.nih.gov/entrez/query.fcgi?cmd=Retrieve&amp;db=pubmed&amp;dopt=Abstract&amp;list_uids=25530216">http://www.ncbi.nlm.nih.gov/entrez/query.fcgi?cmd=Retrieve&amp;db=pubmed&amp;dopt=Abstract&amp;list_uids=25530216</a>  6 Cell Signal 27 3 Mar 2015 Journal Article,Research Support, Non-U.S. Gov't  <a href="http://www.ncbi.nlm.nih.gov/entrez/query.fcgi?cmd=Retrieve&amp;db=pubmed&amp;dopt=Abstract&amp;list_uids=22732841">http://www.ncbi.nlm.nih.gov/entrez/query.fcgi?cmd=Retrieve&amp;db=pubmed&amp;dopt=Abstract&amp;list_uids=22732841</a>  6 EMBO Rep 13 8 Aug 2012 Journal Article,Research Support, Non-U.S. Gov't  <a href="http://www.ncbi.nlm.nih.gov/entrez/query.fcgi?cmd=Retrieve&amp;db=pubmed&amp;dopt=Abstract&amp;list_uids=22302985">http://www.ncbi.nlm.nih.gov/entrez/query.fcgi?cmd=Retrieve&amp;db=pubmed&amp;dopt=Abstract&amp;list_uids=22302985</a>  6 J Cell Sci 125 Pt 2 Jan 2012 Journal Article,Research Support, N.I.H., |

|        |        |                                                                                                                                                                                                                                                                                                                                                                                                                                                                                                                                                                                                                                                                                                                                                                                                                                                                                                                                                                                                                                                                                                                                                                                                                                                                                                                                                                                                                                                                                                                                                                                                                                                                                                                                                                                                                                                                                                                                                                                                                                                                                                                                                                                                                                                                                                                                                                                                                                                                                                                                                                                                                                                                                                                                                                                                                                                                                                                                                                                                                                                                                                                |
|--------|--------|----------------------------------------------------------------------------------------------------------------------------------------------------------------------------------------------------------------------------------------------------------------------------------------------------------------------------------------------------------------------------------------------------------------------------------------------------------------------------------------------------------------------------------------------------------------------------------------------------------------------------------------------------------------------------------------------------------------------------------------------------------------------------------------------------------------------------------------------------------------------------------------------------------------------------------------------------------------------------------------------------------------------------------------------------------------------------------------------------------------------------------------------------------------------------------------------------------------------------------------------------------------------------------------------------------------------------------------------------------------------------------------------------------------------------------------------------------------------------------------------------------------------------------------------------------------------------------------------------------------------------------------------------------------------------------------------------------------------------------------------------------------------------------------------------------------------------------------------------------------------------------------------------------------------------------------------------------------------------------------------------------------------------------------------------------------------------------------------------------------------------------------------------------------------------------------------------------------------------------------------------------------------------------------------------------------------------------------------------------------------------------------------------------------------------------------------------------------------------------------------------------------------------------------------------------------------------------------------------------------------------------------------------------------------------------------------------------------------------------------------------------------------------------------------------------------------------------------------------------------------------------------------------------------------------------------------------------------------------------------------------------------------------------------------------------------------------------------------------------------|
|        |        | <p>Extramural <a href="http://www.ncbi.nlm.nih.gov/entrez/query.fcgi?cmd=Retrieve&amp;db=pubmed&amp;dopt=Abstract&amp;list_uids=26833789">http://www.ncbi.nlm.nih.gov/entrez/query.fcgi?cmd=Retrieve&amp;db=pubmed&amp;dopt=Abstract&amp;list_uids=26833789</a> 6 J Cell Biol 212 3 Feb 2016 Journal Article,Research Support, Non-U.S.</p> <p>Gov't,Webcasts <a href="http://www.ncbi.nlm.nih.gov/entrez/query.fcgi?cmd=Retrieve&amp;db=pubmed&amp;dopt=Abstract&amp;list_uids=26378057">http://www.ncbi.nlm.nih.gov/entrez/query.fcgi?cmd=Retrieve&amp;db=pubmed&amp;dopt=Abstract&amp;list_uids=26378057</a> 6 Oncotarget 6 31 Oct 2015 Journal Article,Research Support, Non-U.S.</p> <p>Gov't <a href="http://www.ncbi.nlm.nih.gov/entrez/query.fcgi?cmd=Retrieve&amp;db=pubmed&amp;dopt=Abstract&amp;list_uids=26172215">http://www.ncbi.nlm.nih.gov/entrez/query.fcgi?cmd=Retrieve&amp;db=pubmed&amp;dopt=Abstract&amp;list_uids=26172215</a> 6 Exp Cell Res 336 2 Aug 2015 Journal Article,Research Support, Non-U.S.</p> <p>Gov't <a href="http://www.ncbi.nlm.nih.gov/entrez/query.fcgi?cmd=Retrieve&amp;db=pubmed&amp;dopt=Abstract&amp;list_uids=25766369">http://www.ncbi.nlm.nih.gov/entrez/query.fcgi?cmd=Retrieve&amp;db=pubmed&amp;dopt=Abstract&amp;list_uids=25766369</a> 6 J Cell Mol Med 19 6 Jun 2015 Journal Article,Research Support, Non-U.S.</p> <p>Gov't <a href="http://www.ncbi.nlm.nih.gov/entrez/query.fcgi?cmd=Retrieve&amp;db=pubmed&amp;dopt=Abstract&amp;list_uids=23209645">http://www.ncbi.nlm.nih.gov/entrez/query.fcgi?cmd=Retrieve&amp;db=pubmed&amp;dopt=Abstract&amp;list_uids=23209645</a> 6 PLoS One 7 11  2012 Journal Article,Research Support, Non-U.S.</p> <p>Gov't <a href="http://www.ncbi.nlm.nih.gov/entrez/query.fcgi?cmd=Retrieve&amp;db=pubmed&amp;dopt=Abstract&amp;list_uids=26119091">http://www.ncbi.nlm.nih.gov/entrez/query.fcgi?cmd=Retrieve&amp;db=pubmed&amp;dopt=Abstract&amp;list_uids=26119091</a> 6 Gene 570 1 Oct 2015 Journal Article,Research Support, N.I.H., Extramural,Research Support, Non-U.S.</p> <p>Gov't,Review <a href="http://www.ncbi.nlm.nih.gov/entrez/query.fcgi?cmd=Retrieve&amp;db=pubmed&amp;dopt=Abstract&amp;list_uids=25359883">http://www.ncbi.nlm.nih.gov/entrez/query.fcgi?cmd=Retrieve&amp;db=pubmed&amp;dopt=Abstract&amp;list_uids=25359883</a> 6 J Cell Sci 127 Pt 24 Dec 2014 Journal Article,Research Support, Non-U.S.</p> <p>Gov't <a href="http://www.ncbi.nlm.nih.gov/entrez/query.fcgi?cmd=Retrieve&amp;db=pubmed&amp;dopt=Abstract&amp;list_uids=23836527">http://www.ncbi.nlm.nih.gov/entrez/query.fcgi?cmd=Retrieve&amp;db=pubmed&amp;dopt=Abstract&amp;list_uids=23836527</a> 6 Stem Cells 31 11 Nov 2013 Journal Article,Research Support, N.I.H., Extramural <a href="http://www.ncbi.nlm.nih.gov/entrez/query.fcgi?cmd=Retrieve&amp;db=pubmed&amp;dopt=Abstract&amp;list_uids=24266736">http://www.ncbi.nlm.nih.gov/entrez/query.fcgi?cmd=Retrieve&amp;db=pubmed&amp;dopt=Abstract&amp;list_uids=24266736</a> 6 Biochem J 458 1 Feb 2014 Journal Article,Research Support, Non-U.S. Gov't</p> |
| uvrag  | tns4   | <p><a href="http://www.ncbi.nlm.nih.gov/entrez/query.fcgi?cmd=Retrieve&amp;db=pubmed&amp;dopt=Abstract&amp;list_uids=26784942">http://www.ncbi.nlm.nih.gov/entrez/query.fcgi?cmd=Retrieve&amp;db=pubmed&amp;dopt=Abstract&amp;list_uids=26784942</a> 6 PLoS One 11 1  2016 Journal Article,Research Support, Non-U.S. Gov't</p>                                                                                                                                                                                                                                                                                                                                                                                                                                                                                                                                                                                                                                                                                                                                                                                                                                                                                                                                                                                                                                                                                                                                                                                                                                                                                                                                                                                                                                                                                                                                                                                                                                                                                                                                                                                                                                                                                                                                                                                                                                                                                                                                                                                                                                                                                                                                                                                                                                                                                                                                                                                                                                                                                                                                                                                |
| mnrn1  | ptk2   | <p><a href="http://www.ncbi.nlm.nih.gov/entrez/query.fcgi?cmd=Retrieve&amp;db=pubmed&amp;dopt=Abstract&amp;list_uids=23689132">http://www.ncbi.nlm.nih.gov/entrez/query.fcgi?cmd=Retrieve&amp;db=pubmed&amp;dopt=Abstract&amp;list_uids=23689132</a> 6 Mol Cell Biol 33 14 Jul 2013 Journal Article,Research Support, N.I.H., Extramural,Research Support, Non-U.S.</p> <p>Gov't <a href="http://www.ncbi.nlm.nih.gov/entrez/query.fcgi?cmd=Retrieve&amp;db=pubmed&amp;dopt=Abstract&amp;list_uids=26745022">http://www.ncbi.nlm.nih.gov/entrez/query.fcgi?cmd=Retrieve&amp;db=pubmed&amp;dopt=Abstract&amp;list_uids=26745022</a> 6 Cancer Invest 34 1  2016 Journal Article,Research Support, Non-U.S.</p> <p>Gov't <a href="http://www.ncbi.nlm.nih.gov/entrez/query.fcgi?cmd=Retrieve&amp;db=pubmed&amp;dopt=Abstract&amp;list_uids=24289792">http://www.ncbi.nlm.nih.gov/entrez/query.fcgi?cmd=Retrieve&amp;db=pubmed&amp;dopt=Abstract&amp;list_uids=24289792</a> 6 Arthritis Res Ther 15 5  2013 Journal Article,Research Support, Non-U.S. Gov't</p>                                                                                                                                                                                                                                                                                                                                                                                                                                                                                                                                                                                                                                                                                                                                                                                                                                                                                                                                                                                                                                                                                                                                                                                                                                                                                                                                                                                                                                                                                                                                                                                                                                                                                                                                                                                                                                                                                                                                                                                                                                                   |
| hgf    | mbtps1 | <p><a href="http://www.ncbi.nlm.nih.gov/entrez/query.fcgi?cmd=Retrieve&amp;db=pubmed&amp;dopt=Abstract&amp;list_uids=26697169">http://www.ncbi.nlm.nih.gov/entrez/query.fcgi?cmd=Retrieve&amp;db=pubmed&amp;dopt=Abstract&amp;list_uids=26697169</a> 6 Pulm Circ 5 4 Dec 2015 Journal Article</p>                                                                                                                                                                                                                                                                                                                                                                                                                                                                                                                                                                                                                                                                                                                                                                                                                                                                                                                                                                                                                                                                                                                                                                                                                                                                                                                                                                                                                                                                                                                                                                                                                                                                                                                                                                                                                                                                                                                                                                                                                                                                                                                                                                                                                                                                                                                                                                                                                                                                                                                                                                                                                                                                                                                                                                                                              |
| hgf    | abl1   | <p><a href="http://www.ncbi.nlm.nih.gov/entrez/query.fcgi?cmd=Retrieve&amp;db=pubmed&amp;dopt=Abstract&amp;list_uids=26697169">http://www.ncbi.nlm.nih.gov/entrez/query.fcgi?cmd=Retrieve&amp;db=pubmed&amp;dopt=Abstract&amp;list_uids=26697169</a> 6 Pulm Circ 5 4 Dec 2015 Journal Article</p>                                                                                                                                                                                                                                                                                                                                                                                                                                                                                                                                                                                                                                                                                                                                                                                                                                                                                                                                                                                                                                                                                                                                                                                                                                                                                                                                                                                                                                                                                                                                                                                                                                                                                                                                                                                                                                                                                                                                                                                                                                                                                                                                                                                                                                                                                                                                                                                                                                                                                                                                                                                                                                                                                                                                                                                                              |
| mbtps1 | abl1   | <p><a href="http://www.ncbi.nlm.nih.gov/entrez/query.fcgi?cmd=Retrieve&amp;db=pubmed&amp;dopt=Abstract&amp;list_uids=26697169">http://www.ncbi.nlm.nih.gov/entrez/query.fcgi?cmd=Retrieve&amp;db=pubmed&amp;dopt=Abstract&amp;list_uids=26697169</a> 6 Pulm Circ 5 4 Dec 2015 Journal Article</p>                                                                                                                                                                                                                                                                                                                                                                                                                                                                                                                                                                                                                                                                                                                                                                                                                                                                                                                                                                                                                                                                                                                                                                                                                                                                                                                                                                                                                                                                                                                                                                                                                                                                                                                                                                                                                                                                                                                                                                                                                                                                                                                                                                                                                                                                                                                                                                                                                                                                                                                                                                                                                                                                                                                                                                                                              |
| hgf    | ing1   | <p><a href="http://www.ncbi.nlm.nih.gov/entrez/query.fcgi?cmd=Retrieve&amp;db=pubmed&amp;dopt=Abstract&amp;list_uids=26697169">http://www.ncbi.nlm.nih.gov/entrez/query.fcgi?cmd=Retrieve&amp;db=pubmed&amp;dopt=Abstract&amp;list_uids=26697169</a> 6 Pulm Circ 5 4 Dec 2015 Journal Article</p>                                                                                                                                                                                                                                                                                                                                                                                                                                                                                                                                                                                                                                                                                                                                                                                                                                                                                                                                                                                                                                                                                                                                                                                                                                                                                                                                                                                                                                                                                                                                                                                                                                                                                                                                                                                                                                                                                                                                                                                                                                                                                                                                                                                                                                                                                                                                                                                                                                                                                                                                                                                                                                                                                                                                                                                                              |
| mbtps1 | ing1   | <p><a href="http://www.ncbi.nlm.nih.gov/entrez/query.fcgi?cmd=Retrieve&amp;db=pubmed&amp;dopt=Abstract&amp;list_uids=26697169">http://www.ncbi.nlm.nih.gov/entrez/query.fcgi?cmd=Retrieve&amp;db=pubmed&amp;dopt=Abstract&amp;list_uids=26697169</a> 6 Pulm Circ 5 4 Dec 2015 Journal Article</p>                                                                                                                                                                                                                                                                                                                                                                                                                                                                                                                                                                                                                                                                                                                                                                                                                                                                                                                                                                                                                                                                                                                                                                                                                                                                                                                                                                                                                                                                                                                                                                                                                                                                                                                                                                                                                                                                                                                                                                                                                                                                                                                                                                                                                                                                                                                                                                                                                                                                                                                                                                                                                                                                                                                                                                                                              |

|        |           |                                                                                                                                                                                                                                                                                                                                                                                                                                                                                                                                                                                                                                                                                                                                                                                                                                                                                                                                                                                                                                                                                                                                                                                                                                                                                                                                                                                                                        |
|--------|-----------|------------------------------------------------------------------------------------------------------------------------------------------------------------------------------------------------------------------------------------------------------------------------------------------------------------------------------------------------------------------------------------------------------------------------------------------------------------------------------------------------------------------------------------------------------------------------------------------------------------------------------------------------------------------------------------------------------------------------------------------------------------------------------------------------------------------------------------------------------------------------------------------------------------------------------------------------------------------------------------------------------------------------------------------------------------------------------------------------------------------------------------------------------------------------------------------------------------------------------------------------------------------------------------------------------------------------------------------------------------------------------------------------------------------------|
| abl1   | ing1      | <a href="http://www.ncbi.nlm.nih.gov/entrez/query.fcgi?cmd=Retrieve&amp;db=pubmed&amp;dopt=Abstract&amp;list_uids=26697169">http://www.ncbi.nlm.nih.gov/entrez/query.fcgi?cmd=Retrieve&amp;db=pubmed&amp;dopt=Abstract&amp;list_uids=26697169</a>  6 Pulm Circ 5 4 Dec 2015 Journal Article                                                                                                                                                                                                                                                                                                                                                                                                                                                                                                                                                                                                                                                                                                                                                                                                                                                                                                                                                                                                                                                                                                                            |
| abl1   | ros1      | <a href="http://www.ncbi.nlm.nih.gov/entrez/query.fcgi?cmd=Retrieve&amp;db=pubmed&amp;dopt=Abstract&amp;list_uids=26697169">http://www.ncbi.nlm.nih.gov/entrez/query.fcgi?cmd=Retrieve&amp;db=pubmed&amp;dopt=Abstract&amp;list_uids=26697169</a>  6 Pulm Circ 5 4 Dec 2015 Journal Article                                                                                                                                                                                                                                                                                                                                                                                                                                                                                                                                                                                                                                                                                                                                                                                                                                                                                                                                                                                                                                                                                                                            |
| hgf    | ros1      | <a href="http://www.ncbi.nlm.nih.gov/entrez/query.fcgi?cmd=Retrieve&amp;db=pubmed&amp;dopt=Abstract&amp;list_uids=26697169">http://www.ncbi.nlm.nih.gov/entrez/query.fcgi?cmd=Retrieve&amp;db=pubmed&amp;dopt=Abstract&amp;list_uids=26697169</a>  6 Pulm Circ 5 4 Dec 2015 Journal Article                                                                                                                                                                                                                                                                                                                                                                                                                                                                                                                                                                                                                                                                                                                                                                                                                                                                                                                                                                                                                                                                                                                            |
| mbtps1 | ros1      | <a href="http://www.ncbi.nlm.nih.gov/entrez/query.fcgi?cmd=Retrieve&amp;db=pubmed&amp;dopt=Abstract&amp;list_uids=26697169">http://www.ncbi.nlm.nih.gov/entrez/query.fcgi?cmd=Retrieve&amp;db=pubmed&amp;dopt=Abstract&amp;list_uids=26697169</a>  6 Pulm Circ 5 4 Dec 2015 Journal Article                                                                                                                                                                                                                                                                                                                                                                                                                                                                                                                                                                                                                                                                                                                                                                                                                                                                                                                                                                                                                                                                                                                            |
| actin  | p2rx7     | <a href="http://www.ncbi.nlm.nih.gov/entrez/query.fcgi?cmd=Retrieve&amp;db=pubmed&amp;dopt=Abstract&amp;list_uids=26683661">http://www.ncbi.nlm.nih.gov/entrez/query.fcgi?cmd=Retrieve&amp;db=pubmed&amp;dopt=Abstract&amp;list_uids=26683661</a>  6 Am J Pathol 186 2 Feb 2016 Journal Article,Research Support, N.I.H., Extramural,Research Support, Non-U.S. Gov't                                                                                                                                                                                                                                                                                                                                                                                                                                                                                                                                                                                                                                                                                                                                                                                                                                                                                                                                                                                                                                                  |
| cd70   | rnd3      | <a href="http://www.ncbi.nlm.nih.gov/entrez/query.fcgi?cmd=Retrieve&amp;db=pubmed&amp;dopt=Abstract&amp;list_uids=26671750">http://www.ncbi.nlm.nih.gov/entrez/query.fcgi?cmd=Retrieve&amp;db=pubmed&amp;dopt=Abstract&amp;list_uids=26671750</a>  6 Br J Cancer 114 1 Jan 2016 Journal Article,Research Support, Non-U.S. Gov't                                                                                                                                                                                                                                                                                                                                                                                                                                                                                                                                                                                                                                                                                                                                                                                                                                                                                                                                                                                                                                                                                       |
| cd70   | rock1     | <a href="http://www.ncbi.nlm.nih.gov/entrez/query.fcgi?cmd=Retrieve&amp;db=pubmed&amp;dopt=Abstract&amp;list_uids=26671750">http://www.ncbi.nlm.nih.gov/entrez/query.fcgi?cmd=Retrieve&amp;db=pubmed&amp;dopt=Abstract&amp;list_uids=26671750</a>  6 Br J Cancer 114 1 Jan 2016 Journal Article,Research Support, Non-U.S. Gov't                                                                                                                                                                                                                                                                                                                                                                                                                                                                                                                                                                                                                                                                                                                                                                                                                                                                                                                                                                                                                                                                                       |
| cd70   | ppp1r1 2a | <a href="http://www.ncbi.nlm.nih.gov/entrez/query.fcgi?cmd=Retrieve&amp;db=pubmed&amp;dopt=Abstract&amp;list_uids=26671750">http://www.ncbi.nlm.nih.gov/entrez/query.fcgi?cmd=Retrieve&amp;db=pubmed&amp;dopt=Abstract&amp;list_uids=26671750</a>  6 Br J Cancer 114 1 Jan 2016 Journal Article,Research Support, Non-U.S. Gov't                                                                                                                                                                                                                                                                                                                                                                                                                                                                                                                                                                                                                                                                                                                                                                                                                                                                                                                                                                                                                                                                                       |
| rnd3   | rock1     | <a href="http://www.ncbi.nlm.nih.gov/entrez/query.fcgi?cmd=Retrieve&amp;db=pubmed&amp;dopt=Abstract&amp;list_uids=26671750">http://www.ncbi.nlm.nih.gov/entrez/query.fcgi?cmd=Retrieve&amp;db=pubmed&amp;dopt=Abstract&amp;list_uids=26671750</a>  6 Br J Cancer 114 1 Jan 2016 Journal Article,Research Support, Non-U.S. Gov't                                                                                                                                                                                                                                                                                                                                                                                                                                                                                                                                                                                                                                                                                                                                                                                                                                                                                                                                                                                                                                                                                       |
| rnd3   | ppp1r1 2a | <a href="http://www.ncbi.nlm.nih.gov/entrez/query.fcgi?cmd=Retrieve&amp;db=pubmed&amp;dopt=Abstract&amp;list_uids=26671750">http://www.ncbi.nlm.nih.gov/entrez/query.fcgi?cmd=Retrieve&amp;db=pubmed&amp;dopt=Abstract&amp;list_uids=26671750</a>  6 Br J Cancer 114 1 Jan 2016 Journal Article,Research Support, Non-U.S. Gov't                                                                                                                                                                                                                                                                                                                                                                                                                                                                                                                                                                                                                                                                                                                                                                                                                                                                                                                                                                                                                                                                                       |
| rock1  | ppp1r1 2a | <a href="http://www.ncbi.nlm.nih.gov/entrez/query.fcgi?cmd=Retrieve&amp;db=pubmed&amp;dopt=Abstract&amp;list_uids=26671750">http://www.ncbi.nlm.nih.gov/entrez/query.fcgi?cmd=Retrieve&amp;db=pubmed&amp;dopt=Abstract&amp;list_uids=26671750</a>  6 Br J Cancer 114 1 Jan 2016 Journal Article,Research Support, Non-U.S. Gov't                                                                                                                                                                                                                                                                                                                                                                                                                                                                                                                                                                                                                                                                                                                                                                                                                                                                                                                                                                                                                                                                                       |
| ephb2  | fhl2      | <a href="http://www.ncbi.nlm.nih.gov/entrez/query.fcgi?cmd=Retrieve&amp;db=pubmed&amp;dopt=Abstract&amp;list_uids=26658111">http://www.ncbi.nlm.nih.gov/entrez/query.fcgi?cmd=Retrieve&amp;db=pubmed&amp;dopt=Abstract&amp;list_uids=26658111</a>  6 PLoS One 10 12  2015 Journal Article,Research Support, Non-U.S. Gov't                                                                                                                                                                                                                                                                                                                                                                                                                                                                                                                                                                                                                                                                                                                                                                                                                                                                                                                                                                                                                                                                                             |
| ephb2  | pdlim5    | <a href="http://www.ncbi.nlm.nih.gov/entrez/query.fcgi?cmd=Retrieve&amp;db=pubmed&amp;dopt=Abstract&amp;list_uids=26658111">http://www.ncbi.nlm.nih.gov/entrez/query.fcgi?cmd=Retrieve&amp;db=pubmed&amp;dopt=Abstract&amp;list_uids=26658111</a>  6 PLoS One 10 12  2015 Journal Article,Research Support, Non-U.S. Gov't                                                                                                                                                                                                                                                                                                                                                                                                                                                                                                                                                                                                                                                                                                                                                                                                                                                                                                                                                                                                                                                                                             |
| fhl2   | pdlim5    | <a href="http://www.ncbi.nlm.nih.gov/entrez/query.fcgi?cmd=Retrieve&amp;db=pubmed&amp;dopt=Abstract&amp;list_uids=26658111">http://www.ncbi.nlm.nih.gov/entrez/query.fcgi?cmd=Retrieve&amp;db=pubmed&amp;dopt=Abstract&amp;list_uids=26658111</a>  6 PLoS One 10 12  2015 Journal Article,Research Support, Non-U.S. Gov't                                                                                                                                                                                                                                                                                                                                                                                                                                                                                                                                                                                                                                                                                                                                                                                                                                                                                                                                                                                                                                                                                             |
| myh14  | actin     | <a href="http://www.ncbi.nlm.nih.gov/entrez/query.fcgi?cmd=Retrieve&amp;db=pubmed&amp;dopt=Abstract&amp;list_uids=22237407">http://www.ncbi.nlm.nih.gov/entrez/query.fcgi?cmd=Retrieve&amp;db=pubmed&amp;dopt=Abstract&amp;list_uids=22237407</a>  6 Am J Physiol Cell Physiol 302 7 Apr 2012 Journal Article,Research Support, N.I.H., Extramural,Research Support, N.I.H., Intramural  <a href="http://www.ncbi.nlm.nih.gov/entrez/query.fcgi?cmd=Retrieve&amp;db=pubmed&amp;dopt=Abstract&amp;list_uids=24121284">http://www.ncbi.nlm.nih.gov/entrez/query.fcgi?cmd=Retrieve&amp;db=pubmed&amp;dopt=Abstract&amp;list_uids=24121284</a>  6 Exp Physiol 99 3 Mar 2014 Journal Article,Research Support, N.I.H., Extramural,Review  <a href="http://www.ncbi.nlm.nih.gov/entrez/query.fcgi?cmd=Retrieve&amp;db=pubmed&amp;dopt=Abstract&amp;list_uids=26652273">http://www.ncbi.nlm.nih.gov/entrez/query.fcgi?cmd=Retrieve&amp;db=pubmed&amp;dopt=Abstract&amp;list_uids=26652273</a>  6 Elife 4  2015 Journal Article,Research Support, Non-U.S. Gov't  <a href="http://www.ncbi.nlm.nih.gov/entrez/query.fcgi?cmd=Retrieve&amp;db=pubmed&amp;dopt=Abstract&amp;list_uids=22707566">http://www.ncbi.nlm.nih.gov/entrez/query.fcgi?cmd=Retrieve&amp;db=pubmed&amp;dopt=Abstract&amp;list_uids=22707566</a>  6 FA SEB J 26 10 Oct 2012 Journal Article,Research Support, N.I.H., Extramural,Research Support, Non-U.S. |

|         |        |                                                                                                                                                                                                                                                                                                                                                                                                                                                                                                                                                                                                                                                                                                                                                                                                                                                                                                                                                                                                                                                                                                                                                                                                                                                                                                                                                                                                                                                                                                                                                                                                                                                                                  |
|---------|--------|----------------------------------------------------------------------------------------------------------------------------------------------------------------------------------------------------------------------------------------------------------------------------------------------------------------------------------------------------------------------------------------------------------------------------------------------------------------------------------------------------------------------------------------------------------------------------------------------------------------------------------------------------------------------------------------------------------------------------------------------------------------------------------------------------------------------------------------------------------------------------------------------------------------------------------------------------------------------------------------------------------------------------------------------------------------------------------------------------------------------------------------------------------------------------------------------------------------------------------------------------------------------------------------------------------------------------------------------------------------------------------------------------------------------------------------------------------------------------------------------------------------------------------------------------------------------------------------------------------------------------------------------------------------------------------|
|         |        | Gov't  <a href="http://www.ncbi.nlm.nih.gov/entrez/query.fcgi?cmd=Retrieve&amp;db=pubmed&amp;dopt=Abstract&amp;list_uids=25883213">http://www.ncbi.nlm.nih.gov/entrez/query.fcgi?cmd=Retrieve&amp;db=pubmed&amp;dopt=Abstract&amp;list_uids=25883213</a>  6 On cotarget 6 13 May 2015 Journal Article,Research Support, Non-U.S.<br>Gov't  <a href="http://www.ncbi.nlm.nih.gov/entrez/query.fcgi?cmd=Retrieve&amp;db=pubmed&amp;dopt=Abstract&amp;list_uids=23782578">http://www.ncbi.nlm.nih.gov/entrez/query.fcgi?cmd=Retrieve&amp;db=pubmed&amp;dopt=Abstract&amp;list_uids=23782578</a>  6 Open Biol 3 6 Jun 2013 Journal Article,Research Support, Non-U.S.<br>Gov't,Review  <a href="http://www.ncbi.nlm.nih.gov/entrez/query.fcgi?cmd=Retrieve&amp;db=pubmed&amp;dopt=Abstract&amp;list_uids=23361003">http://www.ncbi.nlm.nih.gov/entrez/query.fcgi?cmd=Retrieve&amp;db=pubmed&amp;dopt=Abstract&amp;list_uids=23361003</a>  6 Nat Commun 4   2013 Journal Article,Research Support, Non-U.S.<br>Gov't  <a href="http://www.ncbi.nlm.nih.gov/entrez/query.fcgi?cmd=Retrieve&amp;db=pubmed&amp;dopt=Abstract&amp;list_uids=23378028">http://www.ncbi.nlm.nih.gov/entrez/query.fcgi?cmd=Retrieve&amp;db=pubmed&amp;dopt=Abstract&amp;list_uids=23378028</a>  6 J Cell Sci 126 Pt 5 Mar 2013 Journal Article,Research Support, Non-U.S.<br>Gov't  <a href="http://www.ncbi.nlm.nih.gov/entrez/query.fcgi?cmd=Retrieve&amp;db=pubmed&amp;dopt=Abstract&amp;list_uids=23923013">http://www.ncbi.nlm.nih.gov/entrez/query.fcgi?cmd=Retrieve&amp;db=pubmed&amp;dopt=Abstract&amp;list_uids=23923013</a>  6 PLoS One 8 7  2013 Journal Article,Research Support, Non-U.S. Gov't |
| myh14   | prkaa1 | <a href="http://www.ncbi.nlm.nih.gov/entrez/query.fcgi?cmd=Retrieve&amp;db=pubmed&amp;dopt=Abstract&amp;list_uids=26652273">http://www.ncbi.nlm.nih.gov/entrez/query.fcgi?cmd=Retrieve&amp;db=pubmed&amp;dopt=Abstract&amp;list_uids=26652273</a>  6 Elife 4   2015 Journal Article,Research Support, Non-U.S. Gov't                                                                                                                                                                                                                                                                                                                                                                                                                                                                                                                                                                                                                                                                                                                                                                                                                                                                                                                                                                                                                                                                                                                                                                                                                                                                                                                                                             |
| myh14   | vasp   | <a href="http://www.ncbi.nlm.nih.gov/entrez/query.fcgi?cmd=Retrieve&amp;db=pubmed&amp;dopt=Abstract&amp;list_uids=26652273">http://www.ncbi.nlm.nih.gov/entrez/query.fcgi?cmd=Retrieve&amp;db=pubmed&amp;dopt=Abstract&amp;list_uids=26652273</a>  6 Elife 4   2015 Journal Article,Research Support, Non-U.S. Gov't                                                                                                                                                                                                                                                                                                                                                                                                                                                                                                                                                                                                                                                                                                                                                                                                                                                                                                                                                                                                                                                                                                                                                                                                                                                                                                                                                             |
| actin   | prkaa1 | <a href="http://www.ncbi.nlm.nih.gov/entrez/query.fcgi?cmd=Retrieve&amp;db=pubmed&amp;dopt=Abstract&amp;list_uids=26652273">http://www.ncbi.nlm.nih.gov/entrez/query.fcgi?cmd=Retrieve&amp;db=pubmed&amp;dopt=Abstract&amp;list_uids=26652273</a>  6 Elife 4   2015 Journal Article,Research Support, Non-U.S. Gov't                                                                                                                                                                                                                                                                                                                                                                                                                                                                                                                                                                                                                                                                                                                                                                                                                                                                                                                                                                                                                                                                                                                                                                                                                                                                                                                                                             |
| actin   | vasp   | <a href="http://www.ncbi.nlm.nih.gov/entrez/query.fcgi?cmd=Retrieve&amp;db=pubmed&amp;dopt=Abstract&amp;list_uids=26652273">http://www.ncbi.nlm.nih.gov/entrez/query.fcgi?cmd=Retrieve&amp;db=pubmed&amp;dopt=Abstract&amp;list_uids=26652273</a>  6 Elife 4   2015 Journal Article,Research Support, Non-U.S.<br>Gov't  <a href="http://www.ncbi.nlm.nih.gov/entrez/query.fcgi?cmd=Retrieve&amp;db=pubmed&amp;dopt=Abstract&amp;list_uids=26295568">http://www.ncbi.nlm.nih.gov/entrez/query.fcgi?cmd=Retrieve&amp;db=pubmed&amp;dopt=Abstract&amp;list_uids=26295568</a>  6 Elife 4   2015 Journal Article,Research Support, N.I.H., Extramural,Research Support, Non-U.S. Gov't                                                                                                                                                                                                                                                                                                                                                                                                                                                                                                                                                                                                                                                                                                                                                                                                                                                                                                                                                                                               |
| prkaa1  | vasp   | <a href="http://www.ncbi.nlm.nih.gov/entrez/query.fcgi?cmd=Retrieve&amp;db=pubmed&amp;dopt=Abstract&amp;list_uids=26652273">http://www.ncbi.nlm.nih.gov/entrez/query.fcgi?cmd=Retrieve&amp;db=pubmed&amp;dopt=Abstract&amp;list_uids=26652273</a>  6 Elife 4   2015 Journal Article,Research Support, Non-U.S. Gov't                                                                                                                                                                                                                                                                                                                                                                                                                                                                                                                                                                                                                                                                                                                                                                                                                                                                                                                                                                                                                                                                                                                                                                                                                                                                                                                                                             |
| pik3ca  | akt1   | <a href="http://www.ncbi.nlm.nih.gov/entrez/query.fcgi?cmd=Retrieve&amp;db=pubmed&amp;dopt=Abstract&amp;list_uids=26626726">http://www.ncbi.nlm.nih.gov/entrez/query.fcgi?cmd=Retrieve&amp;db=pubmed&amp;dopt=Abstract&amp;list_uids=26626726</a>  6 Stem Cell Res Ther 6   2015 Journal Article,Research Support, N.I.H., Extramural,Research Support, Non-U.S.<br>Gov't  <a href="http://www.ncbi.nlm.nih.gov/entrez/query.fcgi?cmd=Retrieve&amp;db=pubmed&amp;dopt=Abstract&amp;list_uids=25588838">http://www.ncbi.nlm.nih.gov/entrez/query.fcgi?cmd=Retrieve&amp;db=pubmed&amp;dopt=Abstract&amp;list_uids=25588838</a>  6 J Cell Sci 128 5 Mar 2015 Journal Article,Research Support, Non-U.S.<br>Gov't  <a href="http://www.ncbi.nlm.nih.gov/entrez/query.fcgi?cmd=Retrieve&amp;db=pubmed&amp;dopt=Abstract&amp;list_uids=24825896">http://www.ncbi.nlm.nih.gov/entrez/query.fcgi?cmd=Retrieve&amp;db=pubmed&amp;dopt=Abstract&amp;list_uids=24825896</a>  6 J Biol Chem 289 26 Jun 2014 Journal Article,Research Support, N.I.H., Extramural,Research Support, Non-U.S.<br>Gov't  <a href="http://www.ncbi.nlm.nih.gov/entrez/query.fcgi?cmd=Retrieve&amp;db=pubmed&amp;dopt=Abstract&amp;list_uids=22767580">http://www.ncbi.nlm.nih.gov/entrez/query.fcgi?cmd=Retrieve&amp;db=pubmed&amp;dopt=Abstract&amp;list_uids=22767580</a>  6 Mol Biol Cell 23 17 Sep 2012 Journal Article,Research Support, Non-U.S. Gov't                                                                                                                                                                                                                                                     |
| pik3ca  | msc    | <a href="http://www.ncbi.nlm.nih.gov/entrez/query.fcgi?cmd=Retrieve&amp;db=pubmed&amp;dopt=Abstract&amp;list_uids=26626726">http://www.ncbi.nlm.nih.gov/entrez/query.fcgi?cmd=Retrieve&amp;db=pubmed&amp;dopt=Abstract&amp;list_uids=26626726</a>  6 Stem Cell Res Ther 6   2015 Journal Article,Research Support, N.I.H., Extramural,Research Support, Non-U.S. Gov't                                                                                                                                                                                                                                                                                                                                                                                                                                                                                                                                                                                                                                                                                                                                                                                                                                                                                                                                                                                                                                                                                                                                                                                                                                                                                                           |
| akt1    | msc    | <a href="http://www.ncbi.nlm.nih.gov/entrez/query.fcgi?cmd=Retrieve&amp;db=pubmed&amp;dopt=Abstract&amp;list_uids=26626726">http://www.ncbi.nlm.nih.gov/entrez/query.fcgi?cmd=Retrieve&amp;db=pubmed&amp;dopt=Abstract&amp;list_uids=26626726</a>  6 Stem Cell Res Ther 6   2015 Journal Article,Research Support, N.I.H., Extramural,Research Support, Non-U.S. Gov't                                                                                                                                                                                                                                                                                                                                                                                                                                                                                                                                                                                                                                                                                                                                                                                                                                                                                                                                                                                                                                                                                                                                                                                                                                                                                                           |
| 1.1.3.6 | cav1   | <a href="http://www.ncbi.nlm.nih.gov/entrez/query.fcgi?cmd=Retrieve&amp;db=pubmed&amp;dopt=Abstract&amp;list_uids=26626726">http://www.ncbi.nlm.nih.gov/entrez/query.fcgi?cmd=Retrieve&amp;db=pubmed&amp;dopt=Abstract&amp;list_uids=26626726</a>  6 Stem Cell Res Ther 6   2015 Journal Article,Research Support, N.I.H., Extramural,Research Support, Non-U.S. Gov't                                                                                                                                                                                                                                                                                                                                                                                                                                                                                                                                                                                                                                                                                                                                                                                                                                                                                                                                                                                                                                                                                                                                                                                                                                                                                                           |

|         |        |                                                                                                                                                                                                                                                                                                                                                                                                                                                                                                                                                                                                                              |
|---------|--------|------------------------------------------------------------------------------------------------------------------------------------------------------------------------------------------------------------------------------------------------------------------------------------------------------------------------------------------------------------------------------------------------------------------------------------------------------------------------------------------------------------------------------------------------------------------------------------------------------------------------------|
| 1.1.3.6 | pik3ca | <a href="http://www.ncbi.nlm.nih.gov/entrez/query.fcgi?cmd=Retrieve&amp;db=pubmed&amp;dopt=Abstract&amp;list_uids=26626726">http://www.ncbi.nlm.nih.gov/entrez/query.fcgi?cmd=Retrieve&amp;db=pubmed&amp;dopt=Abstract&amp;list_uids=26626726</a>  6 Stem Cell Res Ther 6  2015 Journal Article,Research Support, N.I.H., Extramural,Research Support, Non-U.S. Gov't                                                                                                                                                                                                                                                        |
| 1.1.3.6 | akt1   | <a href="http://www.ncbi.nlm.nih.gov/entrez/query.fcgi?cmd=Retrieve&amp;db=pubmed&amp;dopt=Abstract&amp;list_uids=26626726">http://www.ncbi.nlm.nih.gov/entrez/query.fcgi?cmd=Retrieve&amp;db=pubmed&amp;dopt=Abstract&amp;list_uids=26626726</a>  6 Stem Cell Res Ther 6  2015 Journal Article,Research Support, N.I.H., Extramural,Research Support, Non-U.S. Gov't                                                                                                                                                                                                                                                        |
| 1.1.3.6 | msc    | <a href="http://www.ncbi.nlm.nih.gov/entrez/query.fcgi?cmd=Retrieve&amp;db=pubmed&amp;dopt=Abstract&amp;list_uids=26626726">http://www.ncbi.nlm.nih.gov/entrez/query.fcgi?cmd=Retrieve&amp;db=pubmed&amp;dopt=Abstract&amp;list_uids=26626726</a>  6 Stem Cell Res Ther 6  2015 Journal Article,Research Support, N.I.H., Extramural,Research Support, Non-U.S. Gov't                                                                                                                                                                                                                                                        |
| cav1    | pik3ca | <a href="http://www.ncbi.nlm.nih.gov/entrez/query.fcgi?cmd=Retrieve&amp;db=pubmed&amp;dopt=Abstract&amp;list_uids=26626726">http://www.ncbi.nlm.nih.gov/entrez/query.fcgi?cmd=Retrieve&amp;db=pubmed&amp;dopt=Abstract&amp;list_uids=26626726</a>  6 Stem Cell Res Ther 6  2015 Journal Article,Research Support, N.I.H., Extramural,Research Support, Non-U.S. Gov't                                                                                                                                                                                                                                                        |
| cav1    | akt1   | <a href="http://www.ncbi.nlm.nih.gov/entrez/query.fcgi?cmd=Retrieve&amp;db=pubmed&amp;dopt=Abstract&amp;list_uids=26626726">http://www.ncbi.nlm.nih.gov/entrez/query.fcgi?cmd=Retrieve&amp;db=pubmed&amp;dopt=Abstract&amp;list_uids=26626726</a>  6 Stem Cell Res Ther 6  2015 Journal Article,Research Support, N.I.H., Extramural,Research Support, Non-U.S. Gov't                                                                                                                                                                                                                                                        |
| cav1    | msc    | <a href="http://www.ncbi.nlm.nih.gov/entrez/query.fcgi?cmd=Retrieve&amp;db=pubmed&amp;dopt=Abstract&amp;list_uids=26626726">http://www.ncbi.nlm.nih.gov/entrez/query.fcgi?cmd=Retrieve&amp;db=pubmed&amp;dopt=Abstract&amp;list_uids=26626726</a>  6 Stem Cell Res Ther 6  2015 Journal Article,Research Support, N.I.H., Extramural,Research Support, Non-U.S. Gov't                                                                                                                                                                                                                                                        |
| lpa     | ptk2   | <a href="http://www.ncbi.nlm.nih.gov/entrez/query.fcgi?cmd=Retrieve&amp;db=pubmed&amp;dopt=Abstract&amp;list_uids=26609804">http://www.ncbi.nlm.nih.gov/entrez/query.fcgi?cmd=Retrieve&amp;db=pubmed&amp;dopt=Abstract&amp;list_uids=26609804</a>  6 Int Endod J  Nov 2015 JOURNAL ARTICLE  <a href="http://www.ncbi.nlm.nih.gov/entrez/query.fcgi?cmd=Retrieve&amp;db=pubmed&amp;dopt=Abstract&amp;list_uids=24061591">http://www.ncbi.nlm.nih.gov/entrez/query.fcgi?cmd=Retrieve&amp;db=pubmed&amp;dopt=Abstract&amp;list_uids=24061591</a>  6 Dig Dis Sci 58 12 Dec 2013 Journal Article,Research Support, Non-U.S. Gov't |
| ptk2    | pxn    | <a href="http://www.ncbi.nlm.nih.gov/entrez/query.fcgi?cmd=Retrieve&amp;db=pubmed&amp;dopt=Abstract&amp;list_uids=26546726">http://www.ncbi.nlm.nih.gov/entrez/query.fcgi?cmd=Retrieve&amp;db=pubmed&amp;dopt=Abstract&amp;list_uids=26546726</a>  6 Exp Eye Res 145  Apr 2016 Journal Article                                                                                                                                                                                                                                                                                                                               |
| taf9    | moxd1  | <a href="http://www.ncbi.nlm.nih.gov/entrez/query.fcgi?cmd=Retrieve&amp;db=pubmed&amp;dopt=Abstract&amp;list_uids=26546726">http://www.ncbi.nlm.nih.gov/entrez/query.fcgi?cmd=Retrieve&amp;db=pubmed&amp;dopt=Abstract&amp;list_uids=26546726</a>  6 Exp Eye Res 145  Apr 2016 Journal Article                                                                                                                                                                                                                                                                                                                               |
| taf9    | pxn    | <a href="http://www.ncbi.nlm.nih.gov/entrez/query.fcgi?cmd=Retrieve&amp;db=pubmed&amp;dopt=Abstract&amp;list_uids=26546726">http://www.ncbi.nlm.nih.gov/entrez/query.fcgi?cmd=Retrieve&amp;db=pubmed&amp;dopt=Abstract&amp;list_uids=26546726</a>  6 Exp Eye Res 145  Apr 2016 Journal Article                                                                                                                                                                                                                                                                                                                               |
| moxd1   | pxn    | <a href="http://www.ncbi.nlm.nih.gov/entrez/query.fcgi?cmd=Retrieve&amp;db=pubmed&amp;dopt=Abstract&amp;list_uids=26546726">http://www.ncbi.nlm.nih.gov/entrez/query.fcgi?cmd=Retrieve&amp;db=pubmed&amp;dopt=Abstract&amp;list_uids=26546726</a>  6 Exp Eye Res 145  Apr 2016 Journal Article                                                                                                                                                                                                                                                                                                                               |
| taf9    | ptk2   | <a href="http://www.ncbi.nlm.nih.gov/entrez/query.fcgi?cmd=Retrieve&amp;db=pubmed&amp;dopt=Abstract&amp;list_uids=26546726">http://www.ncbi.nlm.nih.gov/entrez/query.fcgi?cmd=Retrieve&amp;db=pubmed&amp;dopt=Abstract&amp;list_uids=26546726</a>  6 Exp Eye Res 145  Apr 2016 Journal Article                                                                                                                                                                                                                                                                                                                               |
| moxd1   | ptk2   | <a href="http://www.ncbi.nlm.nih.gov/entrez/query.fcgi?cmd=Retrieve&amp;db=pubmed&amp;dopt=Abstract&amp;list_uids=26546726">http://www.ncbi.nlm.nih.gov/entrez/query.fcgi?cmd=Retrieve&amp;db=pubmed&amp;dopt=Abstract&amp;list_uids=26546726</a>  6 Exp Eye Res 145  Apr 2016 Journal Article                                                                                                                                                                                                                                                                                                                               |
| itgax   | itgb2  | <a href="http://www.ncbi.nlm.nih.gov/entrez/query.fcgi?cmd=Retrieve&amp;db=pubmed&amp;dopt=Abstract&amp;list_uids=26519532">http://www.ncbi.nlm.nih.gov/entrez/query.fcgi?cmd=Retrieve&amp;db=pubmed&amp;dopt=Abstract&amp;list_uids=26519532</a>  6 J Immunol 195 11 Dec 2015 Journal Article,Research Support, N.I.H., Extramural                                                                                                                                                                                                                                                                                          |
| itgax   | vcam1  | <a href="http://www.ncbi.nlm.nih.gov/entrez/query.fcgi?cmd=Retrieve&amp;db=pubmed&amp;dopt=Abstract&amp;list_uids=26519532">http://www.ncbi.nlm.nih.gov/entrez/query.fcgi?cmd=Retrieve&amp;db=pubmed&amp;dopt=Abstract&amp;list_uids=26519532</a>  6 J Immunol 195 11 Dec 2015 Journal Article,Research Support, N.I.H., Extramural                                                                                                                                                                                                                                                                                          |
| itgb2   | vcam1  | <a href="http://www.ncbi.nlm.nih.gov/entrez/query.fcgi?cmd=Retrieve&amp;db=pubmed&amp;dopt=Abstract&amp;list_uids=26519532">http://www.ncbi.nlm.nih.gov/entrez/query.fcgi?cmd=Retrieve&amp;db=pubmed&amp;dopt=Abstract&amp;list_uids=26519532</a>  6 J Immunol 195 11 Dec 2015 Journal Article,Research Support, N.I.H., Extramural                                                                                                                                                                                                                                                                                          |
| igf1    | mmp2   | <a href="http://www.ncbi.nlm.nih.gov/entrez/query.fcgi?cmd=Retrieve&amp;db=pubmed&amp;dopt=Abstract&amp;list_uids=26513500">http://www.ncbi.nlm.nih.gov/entrez/query.fcgi?cmd=Retrieve&amp;db=pubmed&amp;dopt=Abstract&amp;list_uids=26513500</a>  6 Invest Ophthalmol Vis Sci 56 11 Oct 2015 Journal Article,Research Support, Non-U.S. Gov't                                                                                                                                                                                                                                                                               |



|        |        |                                                                                                                                                                                                                                                                                                                                                                                                                                                                                                                                                                                                                                                                                                                                                                                                                                                                                                                                                                                                                                                                                                                                                                                                                                                                                                                                                     |
|--------|--------|-----------------------------------------------------------------------------------------------------------------------------------------------------------------------------------------------------------------------------------------------------------------------------------------------------------------------------------------------------------------------------------------------------------------------------------------------------------------------------------------------------------------------------------------------------------------------------------------------------------------------------------------------------------------------------------------------------------------------------------------------------------------------------------------------------------------------------------------------------------------------------------------------------------------------------------------------------------------------------------------------------------------------------------------------------------------------------------------------------------------------------------------------------------------------------------------------------------------------------------------------------------------------------------------------------------------------------------------------------|
| actin  | igf1   | <a href="http://www.ncbi.nlm.nih.gov/entrez/query.fcgi?cmd=Retrieve&amp;db=pubmed&amp;dopt=Abstract&amp;list_uids=26513500">http://www.ncbi.nlm.nih.gov/entrez/query.fcgi?cmd=Retrieve&amp;db=pubmed&amp;dopt=Abstract&amp;list_uids=26513500</a>  6 Invest Ophthalmol Vis Sci 56 11 Oct 2015 Journal Article,Research Support, Non-U.S. Gov't  <a href="http://www.ncbi.nlm.nih.gov/entrez/query.fcgi?cmd=Retrieve&amp;db=pubmed&amp;dopt=Abstract&amp;list_uids=23023326">http://www.ncbi.nlm.nih.gov/entrez/query.fcgi?cmd=Retrieve&amp;db=pubmed&amp;dopt=Abstract&amp;list_uids=23023326</a>  6 Int J Oncol 41 6 Dec 2012 Journal Article,Research Support, Non-U.S. Gov't                                                                                                                                                                                                                                                                                                                                                                                                                                                                                                                                                                                                                                                                     |
| actin  | igf1r  | <a href="http://www.ncbi.nlm.nih.gov/entrez/query.fcgi?cmd=Retrieve&amp;db=pubmed&amp;dopt=Abstract&amp;list_uids=26513500">http://www.ncbi.nlm.nih.gov/entrez/query.fcgi?cmd=Retrieve&amp;db=pubmed&amp;dopt=Abstract&amp;list_uids=26513500</a>  6 Invest Ophthalmol Vis Sci 56 11 Oct 2015 Journal Article,Research Support, Non-U.S. Gov't                                                                                                                                                                                                                                                                                                                                                                                                                                                                                                                                                                                                                                                                                                                                                                                                                                                                                                                                                                                                      |
| igf1   | igf1r  | <a href="http://www.ncbi.nlm.nih.gov/entrez/query.fcgi?cmd=Retrieve&amp;db=pubmed&amp;dopt=Abstract&amp;list_uids=26513500">http://www.ncbi.nlm.nih.gov/entrez/query.fcgi?cmd=Retrieve&amp;db=pubmed&amp;dopt=Abstract&amp;list_uids=26513500</a>  6 Invest Ophthalmol Vis Sci 56 11 Oct 2015 Journal Article,Research Support, Non-U.S. Gov't  <a href="http://www.ncbi.nlm.nih.gov/entrez/query.fcgi?cmd=Retrieve&amp;db=pubmed&amp;dopt=Abstract&amp;list_uids=22859931">http://www.ncbi.nlm.nih.gov/entrez/query.fcgi?cmd=Retrieve&amp;db=pubmed&amp;dopt=Abstract&amp;list_uids=22859931</a>  6 PLoS One 7 6 2012 Journal Article,Research Support, N.I.H., Extramural,Research Support, Non-U.S. Gov't                                                                                                                                                                                                                                                                                                                                                                                                                                                                                                                                                                                                                                        |
| mmp2   | igf1r  | <a href="http://www.ncbi.nlm.nih.gov/entrez/query.fcgi?cmd=Retrieve&amp;db=pubmed&amp;dopt=Abstract&amp;list_uids=26513500">http://www.ncbi.nlm.nih.gov/entrez/query.fcgi?cmd=Retrieve&amp;db=pubmed&amp;dopt=Abstract&amp;list_uids=26513500</a>  6 Invest Ophthalmol Vis Sci 56 11 Oct 2015 Journal Article,Research Support, Non-U.S. Gov't                                                                                                                                                                                                                                                                                                                                                                                                                                                                                                                                                                                                                                                                                                                                                                                                                                                                                                                                                                                                      |
| igf1   | pik3ca | <a href="http://www.ncbi.nlm.nih.gov/entrez/query.fcgi?cmd=Retrieve&amp;db=pubmed&amp;dopt=Abstract&amp;list_uids=26513500">http://www.ncbi.nlm.nih.gov/entrez/query.fcgi?cmd=Retrieve&amp;db=pubmed&amp;dopt=Abstract&amp;list_uids=26513500</a>  6 Invest Ophthalmol Vis Sci 56 11 Oct 2015 Journal Article,Research Support, Non-U.S. Gov't                                                                                                                                                                                                                                                                                                                                                                                                                                                                                                                                                                                                                                                                                                                                                                                                                                                                                                                                                                                                      |
| mmp2   | pik3ca | <a href="http://www.ncbi.nlm.nih.gov/entrez/query.fcgi?cmd=Retrieve&amp;db=pubmed&amp;dopt=Abstract&amp;list_uids=26513500">http://www.ncbi.nlm.nih.gov/entrez/query.fcgi?cmd=Retrieve&amp;db=pubmed&amp;dopt=Abstract&amp;list_uids=26513500</a>  6 Invest Ophthalmol Vis Sci 56 11 Oct 2015 Journal Article,Research Support, Non-U.S. Gov't                                                                                                                                                                                                                                                                                                                                                                                                                                                                                                                                                                                                                                                                                                                                                                                                                                                                                                                                                                                                      |
| flnb   | actin  | <a href="http://www.ncbi.nlm.nih.gov/entrez/query.fcgi?cmd=Retrieve&amp;db=pubmed&amp;dopt=Abstract&amp;list_uids=26491051">http://www.ncbi.nlm.nih.gov/entrez/query.fcgi?cmd=Retrieve&amp;db=pubmed&amp;dopt=Abstract&amp;list_uids=26491051</a>  6 Am J Physiol Cell Physiol 310 1 Jan 2016 Journal Article,Research Support, N.I.H., Extramural,Research Support, Non-U.S. Gov't                                                                                                                                                                                                                                                                                                                                                                                                                                                                                                                                                                                                                                                                                                                                                                                                                                                                                                                                                                 |
| myh14  | cdkn1a | <a href="http://www.ncbi.nlm.nih.gov/entrez/query.fcgi?cmd=Retrieve&amp;db=pubmed&amp;dopt=Abstract&amp;list_uids=26491051">http://www.ncbi.nlm.nih.gov/entrez/query.fcgi?cmd=Retrieve&amp;db=pubmed&amp;dopt=Abstract&amp;list_uids=26491051</a>  6 Am J Physiol Cell Physiol 310 1 Jan 2016 Journal Article,Research Support, N.I.H., Extramural,Research Support, Non-U.S. Gov't                                                                                                                                                                                                                                                                                                                                                                                                                                                                                                                                                                                                                                                                                                                                                                                                                                                                                                                                                                 |
| asprv1 | rhoa   | <a href="http://www.ncbi.nlm.nih.gov/entrez/query.fcgi?cmd=Retrieve&amp;db=pubmed&amp;dopt=Abstract&amp;list_uids=26483365">http://www.ncbi.nlm.nih.gov/entrez/query.fcgi?cmd=Retrieve&amp;db=pubmed&amp;dopt=Abstract&amp;list_uids=26483365</a>  6 Oncotarget 6 31 Oct 2015 Journal Article,Research Support, N.I.H., Extramural                                                                                                                                                                                                                                                                                                                                                                                                                                                                                                                                                                                                                                                                                                                                                                                                                                                                                                                                                                                                                  |
| pdlim7 | itk    | <a href="http://www.ncbi.nlm.nih.gov/entrez/query.fcgi?cmd=Retrieve&amp;db=pubmed&amp;dopt=Abstract&amp;list_uids=26479443">http://www.ncbi.nlm.nih.gov/entrez/query.fcgi?cmd=Retrieve&amp;db=pubmed&amp;dopt=Abstract&amp;list_uids=26479443</a>  6 Oncogenesis 4   2015 Journal Article                                                                                                                                                                                                                                                                                                                                                                                                                                                                                                                                                                                                                                                                                                                                                                                                                                                                                                                                                                                                                                                           |
| pdlim7 | src    | <a href="http://www.ncbi.nlm.nih.gov/entrez/query.fcgi?cmd=Retrieve&amp;db=pubmed&amp;dopt=Abstract&amp;list_uids=26479443">http://www.ncbi.nlm.nih.gov/entrez/query.fcgi?cmd=Retrieve&amp;db=pubmed&amp;dopt=Abstract&amp;list_uids=26479443</a>  6 Oncogenesis 4   2015 Journal Article                                                                                                                                                                                                                                                                                                                                                                                                                                                                                                                                                                                                                                                                                                                                                                                                                                                                                                                                                                                                                                                           |
| pdlim7 | npy6r  | <a href="http://www.ncbi.nlm.nih.gov/entrez/query.fcgi?cmd=Retrieve&amp;db=pubmed&amp;dopt=Abstract&amp;list_uids=26479443">http://www.ncbi.nlm.nih.gov/entrez/query.fcgi?cmd=Retrieve&amp;db=pubmed&amp;dopt=Abstract&amp;list_uids=26479443</a>  6 Oncogenesis 4   2015 Journal Article                                                                                                                                                                                                                                                                                                                                                                                                                                                                                                                                                                                                                                                                                                                                                                                                                                                                                                                                                                                                                                                           |
| src    | npy6r  | <a href="http://www.ncbi.nlm.nih.gov/entrez/query.fcgi?cmd=Retrieve&amp;db=pubmed&amp;dopt=Abstract&amp;list_uids=26479443">http://www.ncbi.nlm.nih.gov/entrez/query.fcgi?cmd=Retrieve&amp;db=pubmed&amp;dopt=Abstract&amp;list_uids=26479443</a>  6 Oncogenesis 4   2015 Journal Article  <a href="http://www.ncbi.nlm.nih.gov/entrez/query.fcgi?cmd=Retrieve&amp;db=pubmed&amp;dopt=Abstract&amp;list_uids=22287273">http://www.ncbi.nlm.nih.gov/entrez/query.fcgi?cmd=Retrieve&amp;db=pubmed&amp;dopt=Abstract&amp;list_uids=22287273</a>  6 J Cell Physiol 227 11 Nov 2012 Journal Article,Research Support, N.I.H., Extramural  <a href="http://www.ncbi.nlm.nih.gov/entrez/query.fcgi?cmd=Retrieve&amp;db=pubmed&amp;dopt=Abstract&amp;list_uids=22505999">http://www.ncbi.nlm.nih.gov/entrez/query.fcgi?cmd=Retrieve&amp;db=pubmed&amp;dopt=Abstract&amp;list_uids=22505999</a>  6 PLoS One 7 4  2012 Journal Article,Research Support, N.I.H., Extramural,Research Support, Non-U.S. Gov't  <a href="http://www.ncbi.nlm.nih.gov/entrez/query.fcgi?cmd=Retrieve&amp;db=pubmed&amp;dopt=Abstract&amp;list_uids=25707853">http://www.ncbi.nlm.nih.gov/entrez/query.fcgi?cmd=Retrieve&amp;db=pubmed&amp;dopt=Abstract&amp;list_uids=25707853</a>  6 Biochem Biophys Res Commun 458 4 Mar 2015 Journal Article,Research Support, Non-U.S. Gov't |

|         |         |                                                                                                                                                                                                                                                                                                                                                                                                                                                                                                                                                                                                                                                                                                |
|---------|---------|------------------------------------------------------------------------------------------------------------------------------------------------------------------------------------------------------------------------------------------------------------------------------------------------------------------------------------------------------------------------------------------------------------------------------------------------------------------------------------------------------------------------------------------------------------------------------------------------------------------------------------------------------------------------------------------------|
| pdlm7   | npc1    | <a href="http://www.ncbi.nlm.nih.gov/entrez/query.fcgi?cmd=Retrieve&amp;db=pubmed&amp;dopt=Abstract&amp;list_uids=26479443">http://www.ncbi.nlm.nih.gov/entrez/query.fcgi?cmd=Retrieve&amp;db=pubmed&amp;dopt=Abstract&amp;list_uids=26479443</a>  6 Oncogenesis 4   2015 Journal Article                                                                                                                                                                                                                                                                                                                                                                                                      |
| src     | mirn27b | <a href="http://www.ncbi.nlm.nih.gov/entrez/query.fcgi?cmd=Retrieve&amp;db=pubmed&amp;dopt=Abstract&amp;list_uids=26473412">http://www.ncbi.nlm.nih.gov/entrez/query.fcgi?cmd=Retrieve&amp;db=pubmed&amp;dopt=Abstract&amp;list_uids=26473412</a>  6 Cancer Sci 107 1 Jan 2016 Journal Article,Research Support, Non-U.S. Gov't                                                                                                                                                                                                                                                                                                                                                                |
| src     | hras    | <a href="http://www.ncbi.nlm.nih.gov/entrez/query.fcgi?cmd=Retrieve&amp;db=pubmed&amp;dopt=Abstract&amp;list_uids=26473412">http://www.ncbi.nlm.nih.gov/entrez/query.fcgi?cmd=Retrieve&amp;db=pubmed&amp;dopt=Abstract&amp;list_uids=26473412</a>  6 Cancer Sci 107 1 Jan 2016 Journal Article,Research Support, Non-U.S. Gov't                                                                                                                                                                                                                                                                                                                                                                |
| mirn27b | hras    | <a href="http://www.ncbi.nlm.nih.gov/entrez/query.fcgi?cmd=Retrieve&amp;db=pubmed&amp;dopt=Abstract&amp;list_uids=26473412">http://www.ncbi.nlm.nih.gov/entrez/query.fcgi?cmd=Retrieve&amp;db=pubmed&amp;dopt=Abstract&amp;list_uids=26473412</a>  6 Cancer Sci 107 1 Jan 2016 Journal Article,Research Support, Non-U.S. Gov't                                                                                                                                                                                                                                                                                                                                                                |
| arfgef1 | mirn27b | <a href="http://www.ncbi.nlm.nih.gov/entrez/query.fcgi?cmd=Retrieve&amp;db=pubmed&amp;dopt=Abstract&amp;list_uids=26473412">http://www.ncbi.nlm.nih.gov/entrez/query.fcgi?cmd=Retrieve&amp;db=pubmed&amp;dopt=Abstract&amp;list_uids=26473412</a>  6 Cancer Sci 107 1 Jan 2016 Journal Article,Research Support, Non-U.S. Gov't                                                                                                                                                                                                                                                                                                                                                                |
| ptk2    | rab21   | <a href="http://www.ncbi.nlm.nih.gov/entrez/query.fcgi?cmd=Retrieve&amp;db=pubmed&amp;dopt=Abstract&amp;list_uids=26436690">http://www.ncbi.nlm.nih.gov/entrez/query.fcgi?cmd=Retrieve&amp;db=pubmed&amp;dopt=Abstract&amp;list_uids=26436690</a>  6 Nat Cell Biol 17 11 Nov 2015 Journal Article,Research Support, Non-U.S. Gov't                                                                                                                                                                                                                                                                                                                                                             |
| arhgap1 | dlc1    | <a href="http://www.ncbi.nlm.nih.gov/entrez/query.fcgi?cmd=Retrieve&amp;db=pubmed&amp;dopt=Abstract&amp;list_uids=26427649">http://www.ncbi.nlm.nih.gov/entrez/query.fcgi?cmd=Retrieve&amp;db=pubmed&amp;dopt=Abstract&amp;list_uids=26427649</a>  6 Biochim Biophys Acta 1853 12 Dec 2015 Journal Article,Research Support, N.I.H., Extramural                                                                                                                                                                                                                                                                                                                                                |
| arhgap1 | rhoa    | <a href="http://www.ncbi.nlm.nih.gov/entrez/query.fcgi?cmd=Retrieve&amp;db=pubmed&amp;dopt=Abstract&amp;list_uids=26427649">http://www.ncbi.nlm.nih.gov/entrez/query.fcgi?cmd=Retrieve&amp;db=pubmed&amp;dopt=Abstract&amp;list_uids=26427649</a>  6 Biochim Biophys Acta 1853 12 Dec 2015 Journal Article,Research Support, N.I.H., Extramural                                                                                                                                                                                                                                                                                                                                                |
| arhgap1 | actin   | <a href="http://www.ncbi.nlm.nih.gov/entrez/query.fcgi?cmd=Retrieve&amp;db=pubmed&amp;dopt=Abstract&amp;list_uids=26427649">http://www.ncbi.nlm.nih.gov/entrez/query.fcgi?cmd=Retrieve&amp;db=pubmed&amp;dopt=Abstract&amp;list_uids=26427649</a>  6 Biochim Biophys Acta 1853 12 Dec 2015 Journal Article,Research Support, N.I.H., Extramural                                                                                                                                                                                                                                                                                                                                                |
| dlc1    | rhoa    | <a href="http://www.ncbi.nlm.nih.gov/entrez/query.fcgi?cmd=Retrieve&amp;db=pubmed&amp;dopt=Abstract&amp;list_uids=26427649">http://www.ncbi.nlm.nih.gov/entrez/query.fcgi?cmd=Retrieve&amp;db=pubmed&amp;dopt=Abstract&amp;list_uids=26427649</a>  6 Biochim Biophys Acta 1853 12 Dec 2015 Journal Article,Research Support, N.I.H., Extramural  <a href="http://www.ncbi.nlm.nih.gov/entrez/query.fcgi?cmd=Retrieve&amp;db=pubmed&amp;dopt=Abstract&amp;list_uids=22307599">http://www.ncbi.nlm.nih.gov/entrez/query.fcgi?cmd=Retrieve&amp;db=pubmed&amp;dopt=Abstract&amp;list_uids=22307599</a>  6 Proc Natl Acad Sci U S A 109 5 Jan 2012 Journal Article,Research Support, Non-U.S. Gov't |
| dlc1    | actin   | <a href="http://www.ncbi.nlm.nih.gov/entrez/query.fcgi?cmd=Retrieve&amp;db=pubmed&amp;dopt=Abstract&amp;list_uids=26427649">http://www.ncbi.nlm.nih.gov/entrez/query.fcgi?cmd=Retrieve&amp;db=pubmed&amp;dopt=Abstract&amp;list_uids=26427649</a>  6 Biochim Biophys Acta 1853 12 Dec 2015 Journal Article,Research Support, N.I.H., Extramural  <a href="http://www.ncbi.nlm.nih.gov/entrez/query.fcgi?cmd=Retrieve&amp;db=pubmed&amp;dopt=Abstract&amp;list_uids=22307599">http://www.ncbi.nlm.nih.gov/entrez/query.fcgi?cmd=Retrieve&amp;db=pubmed&amp;dopt=Abstract&amp;list_uids=22307599</a>  6 Proc Natl Acad Sci U S A 109 5 Jan 2012 Journal Article,Research Support, Non-U.S. Gov't |
| tns1    | actin   | <a href="http://www.ncbi.nlm.nih.gov/entrez/query.fcgi?cmd=Retrieve&amp;db=pubmed&amp;dopt=Abstract&amp;list_uids=26427649">http://www.ncbi.nlm.nih.gov/entrez/query.fcgi?cmd=Retrieve&amp;db=pubmed&amp;dopt=Abstract&amp;list_uids=26427649</a>  6 Biochim Biophys Acta 1853 12 Dec 2015 Journal Article,Research Support, N.I.H., Extramural                                                                                                                                                                                                                                                                                                                                                |
| dlc1    | tns1    | <a href="http://www.ncbi.nlm.nih.gov/entrez/query.fcgi?cmd=Retrieve&amp;db=pubmed&amp;dopt=Abstract&amp;list_uids=26427649">http://www.ncbi.nlm.nih.gov/entrez/query.fcgi?cmd=Retrieve&amp;db=pubmed&amp;dopt=Abstract&amp;list_uids=26427649</a>  6 Biochim Biophys Acta 1853 12 Dec 2015 Journal Article,Research Support, N.I.H., Extramural                                                                                                                                                                                                                                                                                                                                                |
| dlc1    | ptbp1   | <a href="http://www.ncbi.nlm.nih.gov/entrez/query.fcgi?cmd=Retrieve&amp;db=pubmed&amp;dopt=Abstract&amp;list_uids=26427649">http://www.ncbi.nlm.nih.gov/entrez/query.fcgi?cmd=Retrieve&amp;db=pubmed&amp;dopt=Abstract&amp;list_uids=26427649</a>  6 Biochim Biophys Acta 1853 12 Dec 2015 Journal Article,Research Support, N.I.H., Extramural                                                                                                                                                                                                                                                                                                                                                |
| tns1    | ptbp1   | <a href="http://www.ncbi.nlm.nih.gov/entrez/query.fcgi?cmd=Retrieve&amp;db=pubmed&amp;dopt=Abstract&amp;list_uids=26427649">http://www.ncbi.nlm.nih.gov/entrez/query.fcgi?cmd=Retrieve&amp;db=pubmed&amp;dopt=Abstract&amp;list_uids=26427649</a>  6 Biochim Biophys Acta 1853 12 Dec 2015 Journal Article,Research Support, N.I.H., Extramural                                                                                                                                                                                                                                                                                                                                                |
| tns1    | arhgap1 | <a href="http://www.ncbi.nlm.nih.gov/entrez/query.fcgi?cmd=Retrieve&amp;db=pubmed&amp;dopt=Abstract&amp;list_uids=26427649">http://www.ncbi.nlm.nih.gov/entrez/query.fcgi?cmd=Retrieve&amp;db=pubmed&amp;dopt=Abstract&amp;list_uids=26427649</a>  6 Biochim Biophys Acta 1853 12 Dec 2015 Journal Article,Research Support, N.I.H., Extramural                                                                                                                                                                                                                                                                                                                                                |

|       |        |                                                                                                                                                                                                                                                                                                                                                                                                                                                                                                                                                                                                                                                                            |
|-------|--------|----------------------------------------------------------------------------------------------------------------------------------------------------------------------------------------------------------------------------------------------------------------------------------------------------------------------------------------------------------------------------------------------------------------------------------------------------------------------------------------------------------------------------------------------------------------------------------------------------------------------------------------------------------------------------|
| tns1  | rhoa   | <a href="http://www.ncbi.nlm.nih.gov/entrez/query.fcgi?cmd=Retrieve&amp;db=pubmed&amp;dopt=Abstract&amp;list_uids=26427649">http://www.ncbi.nlm.nih.gov/entrez/query.fcgi?cmd=Retrieve&amp;db=pubmed&amp;dopt=Abstract&amp;list_uids=26427649</a>  6 Biochim Biophys Acta 1853 12 Dec 2015 Journal Article,Research Support, N.I.H., Extramural                                                                                                                                                                                                                                                                                                                            |
| jak2  | ghr    | <a href="http://www.ncbi.nlm.nih.gov/entrez/query.fcgi?cmd=Retrieve&amp;db=pubmed&amp;dopt=Abstract&amp;list_uids=26421979">http://www.ncbi.nlm.nih.gov/entrez/query.fcgi?cmd=Retrieve&amp;db=pubmed&amp;dopt=Abstract&amp;list_uids=26421979</a>  6 Growth Horm IGF Res 28  Jun 2016 Journal Article                                                                                                                                                                                                                                                                                                                                                                      |
| soat1 | shc1   | <a href="http://www.ncbi.nlm.nih.gov/entrez/query.fcgi?cmd=Retrieve&amp;db=pubmed&amp;dopt=Abstract&amp;list_uids=26421979">http://www.ncbi.nlm.nih.gov/entrez/query.fcgi?cmd=Retrieve&amp;db=pubmed&amp;dopt=Abstract&amp;list_uids=26421979</a>  6 Growth Horm IGF Res 28  Jun 2016 Journal Article                                                                                                                                                                                                                                                                                                                                                                      |
| soat1 | akt1   | <a href="http://www.ncbi.nlm.nih.gov/entrez/query.fcgi?cmd=Retrieve&amp;db=pubmed&amp;dopt=Abstract&amp;list_uids=26421979">http://www.ncbi.nlm.nih.gov/entrez/query.fcgi?cmd=Retrieve&amp;db=pubmed&amp;dopt=Abstract&amp;list_uids=26421979</a>  6 Growth Horm IGF Res 28  Jun 2016 Journal Article                                                                                                                                                                                                                                                                                                                                                                      |
| soat1 | ptpn11 | <a href="http://www.ncbi.nlm.nih.gov/entrez/query.fcgi?cmd=Retrieve&amp;db=pubmed&amp;dopt=Abstract&amp;list_uids=26421979">http://www.ncbi.nlm.nih.gov/entrez/query.fcgi?cmd=Retrieve&amp;db=pubmed&amp;dopt=Abstract&amp;list_uids=26421979</a>  6 Growth Horm IGF Res 28  Jun 2016 Journal Article                                                                                                                                                                                                                                                                                                                                                                      |
| soat1 | sh2b1  | <a href="http://www.ncbi.nlm.nih.gov/entrez/query.fcgi?cmd=Retrieve&amp;db=pubmed&amp;dopt=Abstract&amp;list_uids=26421979">http://www.ncbi.nlm.nih.gov/entrez/query.fcgi?cmd=Retrieve&amp;db=pubmed&amp;dopt=Abstract&amp;list_uids=26421979</a>  6 Growth Horm IGF Res 28  Jun 2016 Journal Article                                                                                                                                                                                                                                                                                                                                                                      |
| soat1 | jak2   | <a href="http://www.ncbi.nlm.nih.gov/entrez/query.fcgi?cmd=Retrieve&amp;db=pubmed&amp;dopt=Abstract&amp;list_uids=26421979">http://www.ncbi.nlm.nih.gov/entrez/query.fcgi?cmd=Retrieve&amp;db=pubmed&amp;dopt=Abstract&amp;list_uids=26421979</a>  6 Growth Horm IGF Res 28  Jun 2016 Journal Article                                                                                                                                                                                                                                                                                                                                                                      |
| soat1 | actin  | <a href="http://www.ncbi.nlm.nih.gov/entrez/query.fcgi?cmd=Retrieve&amp;db=pubmed&amp;dopt=Abstract&amp;list_uids=26421979">http://www.ncbi.nlm.nih.gov/entrez/query.fcgi?cmd=Retrieve&amp;db=pubmed&amp;dopt=Abstract&amp;list_uids=26421979</a>  6 Growth Horm IGF Res 28  Jun 2016 Journal Article                                                                                                                                                                                                                                                                                                                                                                      |
| shc1  | akt1   | <a href="http://www.ncbi.nlm.nih.gov/entrez/query.fcgi?cmd=Retrieve&amp;db=pubmed&amp;dopt=Abstract&amp;list_uids=26421979">http://www.ncbi.nlm.nih.gov/entrez/query.fcgi?cmd=Retrieve&amp;db=pubmed&amp;dopt=Abstract&amp;list_uids=26421979</a>  6 Growth Horm IGF Res 28  Jun 2016 Journal Article                                                                                                                                                                                                                                                                                                                                                                      |
| shc1  | ptpn11 | <a href="http://www.ncbi.nlm.nih.gov/entrez/query.fcgi?cmd=Retrieve&amp;db=pubmed&amp;dopt=Abstract&amp;list_uids=26421979">http://www.ncbi.nlm.nih.gov/entrez/query.fcgi?cmd=Retrieve&amp;db=pubmed&amp;dopt=Abstract&amp;list_uids=26421979</a>  6 Growth Horm IGF Res 28  Jun 2016 Journal Article                                                                                                                                                                                                                                                                                                                                                                      |
| shc1  | sh2b1  | <a href="http://www.ncbi.nlm.nih.gov/entrez/query.fcgi?cmd=Retrieve&amp;db=pubmed&amp;dopt=Abstract&amp;list_uids=26421979">http://www.ncbi.nlm.nih.gov/entrez/query.fcgi?cmd=Retrieve&amp;db=pubmed&amp;dopt=Abstract&amp;list_uids=26421979</a>  6 Growth Horm IGF Res 28  Jun 2016 Journal Article                                                                                                                                                                                                                                                                                                                                                                      |
| shc1  | jak2   | <a href="http://www.ncbi.nlm.nih.gov/entrez/query.fcgi?cmd=Retrieve&amp;db=pubmed&amp;dopt=Abstract&amp;list_uids=26421979">http://www.ncbi.nlm.nih.gov/entrez/query.fcgi?cmd=Retrieve&amp;db=pubmed&amp;dopt=Abstract&amp;list_uids=26421979</a>  6 Growth Horm IGF Res 28  Jun 2016 Journal Article                                                                                                                                                                                                                                                                                                                                                                      |
| shc1  | actin  | <a href="http://www.ncbi.nlm.nih.gov/entrez/query.fcgi?cmd=Retrieve&amp;db=pubmed&amp;dopt=Abstract&amp;list_uids=25096985">http://www.ncbi.nlm.nih.gov/entrez/query.fcgi?cmd=Retrieve&amp;db=pubmed&amp;dopt=Abstract&amp;list_uids=25096985</a>  6 Horm Cancer 5 6 Dec 2014 Journal Article,Research Support, N.I.H., Extramural,Research Support, Non-U.S. Gov't  <a href="http://www.ncbi.nlm.nih.gov/entrez/query.fcgi?cmd=Retrieve&amp;db=pubmed&amp;dopt=Abstract&amp;list_uids=26421979">http://www.ncbi.nlm.nih.gov/entrez/query.fcgi?cmd=Retrieve&amp;db=pubmed&amp;dopt=Abstract&amp;list_uids=26421979</a>  6 Growth Horm IGF Res 28  Jun 2016 Journal Article |
| akt1  | ptpn11 | <a href="http://www.ncbi.nlm.nih.gov/entrez/query.fcgi?cmd=Retrieve&amp;db=pubmed&amp;dopt=Abstract&amp;list_uids=26421979">http://www.ncbi.nlm.nih.gov/entrez/query.fcgi?cmd=Retrieve&amp;db=pubmed&amp;dopt=Abstract&amp;list_uids=26421979</a>  6 Growth Horm IGF Res 28  Jun 2016 Journal Article                                                                                                                                                                                                                                                                                                                                                                      |
| akt1  | sh2b1  | <a href="http://www.ncbi.nlm.nih.gov/entrez/query.fcgi?cmd=Retrieve&amp;db=pubmed&amp;dopt=Abstract&amp;list_uids=26421979">http://www.ncbi.nlm.nih.gov/entrez/query.fcgi?cmd=Retrieve&amp;db=pubmed&amp;dopt=Abstract&amp;list_uids=26421979</a>  6 Growth Horm IGF Res 28  Jun 2016 Journal Article                                                                                                                                                                                                                                                                                                                                                                      |
| akt1  | jak2   | <a href="http://www.ncbi.nlm.nih.gov/entrez/query.fcgi?cmd=Retrieve&amp;db=pubmed&amp;dopt=Abstract&amp;list_uids=24861878">http://www.ncbi.nlm.nih.gov/entrez/query.fcgi?cmd=Retrieve&amp;db=pubmed&amp;dopt=Abstract&amp;list_uids=24861878</a>  6 Neuro Oncol 16 9 Sep 2014 Journal Article,Research Support, Non-U.S. Gov't  <a href="http://www.ncbi.nlm.nih.gov/entrez/query.fcgi?cmd=Retrieve&amp;db=pubmed&amp;dopt=Abstract&amp;list_uids=26421979">http://www.ncbi.nlm.nih.gov/entrez/query.fcgi?cmd=Retrieve&amp;db=pubmed&amp;dopt=Abstract&amp;list_uids=26421979</a>  6 Growth Horm IGF Res 28  Jun 2016 Journal Article                                     |

|         |        |                                                                                                                                                                                                                                                                                                                                                                                                                                                                                                                                                                                                                                     |
|---------|--------|-------------------------------------------------------------------------------------------------------------------------------------------------------------------------------------------------------------------------------------------------------------------------------------------------------------------------------------------------------------------------------------------------------------------------------------------------------------------------------------------------------------------------------------------------------------------------------------------------------------------------------------|
| akt1    | actin  | <a href="http://www.ncbi.nlm.nih.gov/entrez/query.fcgi?cmd=Retrieve&amp;db=pubmed&amp;dopt=Abstract&amp;list_uids=24635319">http://www.ncbi.nlm.nih.gov/entrez/query.fcgi?cmd=Retrieve&amp;db=pubmed&amp;dopt=Abstract&amp;list_uids=24635319</a> [6]Biochem J[459]3 May 2014 Journal Article,Research Support, Non-U.S. Gov't <a href="http://www.ncbi.nlm.nih.gov/entrez/query.fcgi?cmd=Retrieve&amp;db=pubmed&amp;dopt=Abstract&amp;list_uids=26421979">http://www.ncbi.nlm.nih.gov/entrez/query.fcgi?cmd=Retrieve&amp;db=pubmed&amp;dopt=Abstract&amp;list_uids=26421979</a> [6]Growth Horm IGF Res[28]Jun 2016 Journal Article |
| ptpn11  | sh2b1  | <a href="http://www.ncbi.nlm.nih.gov/entrez/query.fcgi?cmd=Retrieve&amp;db=pubmed&amp;dopt=Abstract&amp;list_uids=26421979">http://www.ncbi.nlm.nih.gov/entrez/query.fcgi?cmd=Retrieve&amp;db=pubmed&amp;dopt=Abstract&amp;list_uids=26421979</a> [6]Growth Horm IGF Res[28]Jun 2016 Journal Article                                                                                                                                                                                                                                                                                                                                |
| ptpn11  | jak2   | <a href="http://www.ncbi.nlm.nih.gov/entrez/query.fcgi?cmd=Retrieve&amp;db=pubmed&amp;dopt=Abstract&amp;list_uids=26421979">http://www.ncbi.nlm.nih.gov/entrez/query.fcgi?cmd=Retrieve&amp;db=pubmed&amp;dopt=Abstract&amp;list_uids=26421979</a> [6]Growth Horm IGF Res[28]Jun 2016 Journal Article                                                                                                                                                                                                                                                                                                                                |
| ptpn11  | actin  | <a href="http://www.ncbi.nlm.nih.gov/entrez/query.fcgi?cmd=Retrieve&amp;db=pubmed&amp;dopt=Abstract&amp;list_uids=26421979">http://www.ncbi.nlm.nih.gov/entrez/query.fcgi?cmd=Retrieve&amp;db=pubmed&amp;dopt=Abstract&amp;list_uids=26421979</a> [6]Growth Horm IGF Res[28]Jun 2016 Journal Article                                                                                                                                                                                                                                                                                                                                |
| sh2b1   | jak2   | <a href="http://www.ncbi.nlm.nih.gov/entrez/query.fcgi?cmd=Retrieve&amp;db=pubmed&amp;dopt=Abstract&amp;list_uids=26421979">http://www.ncbi.nlm.nih.gov/entrez/query.fcgi?cmd=Retrieve&amp;db=pubmed&amp;dopt=Abstract&amp;list_uids=26421979</a> [6]Growth Horm IGF Res[28]Jun 2016 Journal Article                                                                                                                                                                                                                                                                                                                                |
| sh2b1   | actin  | <a href="http://www.ncbi.nlm.nih.gov/entrez/query.fcgi?cmd=Retrieve&amp;db=pubmed&amp;dopt=Abstract&amp;list_uids=26421979">http://www.ncbi.nlm.nih.gov/entrez/query.fcgi?cmd=Retrieve&amp;db=pubmed&amp;dopt=Abstract&amp;list_uids=26421979</a> [6]Growth Horm IGF Res[28]Jun 2016 Journal Article                                                                                                                                                                                                                                                                                                                                |
| jak2    | actin  | <a href="http://www.ncbi.nlm.nih.gov/entrez/query.fcgi?cmd=Retrieve&amp;db=pubmed&amp;dopt=Abstract&amp;list_uids=26421979">http://www.ncbi.nlm.nih.gov/entrez/query.fcgi?cmd=Retrieve&amp;db=pubmed&amp;dopt=Abstract&amp;list_uids=26421979</a> [6]Growth Horm IGF Res[28]Jun 2016 Journal Article                                                                                                                                                                                                                                                                                                                                |
| itga11  | fgf2   | <a href="http://www.ncbi.nlm.nih.gov/entrez/query.fcgi?cmd=Retrieve&amp;db=pubmed&amp;dopt=Abstract&amp;list_uids=26403263">http://www.ncbi.nlm.nih.gov/entrez/query.fcgi?cmd=Retrieve&amp;db=pubmed&amp;dopt=Abstract&amp;list_uids=26403263</a> [6]J Cell Biochem[117]4 Apr 2016 Journal Article,Research Support, N.I.H., Extramural                                                                                                                                                                                                                                                                                             |
| itga11  | mapk3  | <a href="http://www.ncbi.nlm.nih.gov/entrez/query.fcgi?cmd=Retrieve&amp;db=pubmed&amp;dopt=Abstract&amp;list_uids=26403263">http://www.ncbi.nlm.nih.gov/entrez/query.fcgi?cmd=Retrieve&amp;db=pubmed&amp;dopt=Abstract&amp;list_uids=26403263</a> [6]J Cell Biochem[117]4 Apr 2016 Journal Article,Research Support, N.I.H., Extramural                                                                                                                                                                                                                                                                                             |
| fgf2    | mapk3  | <a href="http://www.ncbi.nlm.nih.gov/entrez/query.fcgi?cmd=Retrieve&amp;db=pubmed&amp;dopt=Abstract&amp;list_uids=26403263">http://www.ncbi.nlm.nih.gov/entrez/query.fcgi?cmd=Retrieve&amp;db=pubmed&amp;dopt=Abstract&amp;list_uids=26403263</a> [6]J Cell Biochem[117]4 Apr 2016 Journal Article,Research Support, N.I.H., Extramural                                                                                                                                                                                                                                                                                             |
| cyth2   | rras   | <a href="http://www.ncbi.nlm.nih.gov/entrez/query.fcgi?cmd=Retrieve&amp;db=pubmed&amp;dopt=Abstract&amp;list_uids=26378252">http://www.ncbi.nlm.nih.gov/entrez/query.fcgi?cmd=Retrieve&amp;db=pubmed&amp;dopt=Abstract&amp;list_uids=26378252</a> [6]Mol Biol Cell[26]23 Nov 2015 Journal Article,Research Support, N.I.H., Extramural,Research Support, Non-U.S. Gov't                                                                                                                                                                                                                                                             |
| cyth2   | cdkn2a | <a href="http://www.ncbi.nlm.nih.gov/entrez/query.fcgi?cmd=Retrieve&amp;db=pubmed&amp;dopt=Abstract&amp;list_uids=26378252">http://www.ncbi.nlm.nih.gov/entrez/query.fcgi?cmd=Retrieve&amp;db=pubmed&amp;dopt=Abstract&amp;list_uids=26378252</a> [6]Mol Biol Cell[26]23 Nov 2015 Journal Article,Research Support, N.I.H., Extramural,Research Support, Non-U.S. Gov't                                                                                                                                                                                                                                                             |
| rras    | cdkn2a | <a href="http://www.ncbi.nlm.nih.gov/entrez/query.fcgi?cmd=Retrieve&amp;db=pubmed&amp;dopt=Abstract&amp;list_uids=26378252">http://www.ncbi.nlm.nih.gov/entrez/query.fcgi?cmd=Retrieve&amp;db=pubmed&amp;dopt=Abstract&amp;list_uids=26378252</a> [6]Mol Biol Cell[26]23 Nov 2015 Journal Article,Research Support, N.I.H., Extramural,Research Support, Non-U.S. Gov't                                                                                                                                                                                                                                                             |
| arhgef2 | cyth2  | <a href="http://www.ncbi.nlm.nih.gov/entrez/query.fcgi?cmd=Retrieve&amp;db=pubmed&amp;dopt=Abstract&amp;list_uids=26378252">http://www.ncbi.nlm.nih.gov/entrez/query.fcgi?cmd=Retrieve&amp;db=pubmed&amp;dopt=Abstract&amp;list_uids=26378252</a> [6]Mol Biol Cell[26]23 Nov 2015 Journal Article,Research Support, N.I.H., Extramural,Research Support, Non-U.S. Gov't                                                                                                                                                                                                                                                             |
| arhgef2 | rras   | <a href="http://www.ncbi.nlm.nih.gov/entrez/query.fcgi?cmd=Retrieve&amp;db=pubmed&amp;dopt=Abstract&amp;list_uids=26378252">http://www.ncbi.nlm.nih.gov/entrez/query.fcgi?cmd=Retrieve&amp;db=pubmed&amp;dopt=Abstract&amp;list_uids=26378252</a> [6]Mol Biol Cell[26]23 Nov 2015 Journal Article,Research Support, N.I.H., Extramural,Research Support, Non-U.S. Gov't                                                                                                                                                                                                                                                             |
| arhgef2 | ehd1   | <a href="http://www.ncbi.nlm.nih.gov/entrez/query.fcgi?cmd=Retrieve&amp;db=pubmed&amp;dopt=Abstract&amp;list_uids=26378252">http://www.ncbi.nlm.nih.gov/entrez/query.fcgi?cmd=Retrieve&amp;db=pubmed&amp;dopt=Abstract&amp;list_uids=26378252</a> [6]Mol Biol Cell[26]23 Nov 2015 Journal Article,Research Support, N.I.H., Extramural,Research Support, Non-U.S. Gov't                                                                                                                                                                                                                                                             |
| cyth2   | ehd1   | <a href="http://www.ncbi.nlm.nih.gov/entrez/query.fcgi?cmd=Retrieve&amp;db=pubmed&amp;dopt=Abstract&amp;list_uids=26378252">http://www.ncbi.nlm.nih.gov/entrez/query.fcgi?cmd=Retrieve&amp;db=pubmed&amp;dopt=Abstract&amp;list_uids=26378252</a> [6]Mol Biol Cell[26]23 Nov 2015 Journal Article,Research Support, N.I.H., Extramural,Research Support, Non-U.S. Gov't                                                                                                                                                                                                                                                             |

|         |         |                                                                                                                                                                                                                                                                                                                                                                                                                                                                                                                                                                                                                                                                                                                                                                                                                                                                                                                                                                                                                                                                                                                                                                                                                                                                                                                                                                                                                                                             |
|---------|---------|-------------------------------------------------------------------------------------------------------------------------------------------------------------------------------------------------------------------------------------------------------------------------------------------------------------------------------------------------------------------------------------------------------------------------------------------------------------------------------------------------------------------------------------------------------------------------------------------------------------------------------------------------------------------------------------------------------------------------------------------------------------------------------------------------------------------------------------------------------------------------------------------------------------------------------------------------------------------------------------------------------------------------------------------------------------------------------------------------------------------------------------------------------------------------------------------------------------------------------------------------------------------------------------------------------------------------------------------------------------------------------------------------------------------------------------------------------------|
| rras    | ehd1    | <a href="http://www.ncbi.nlm.nih.gov/entrez/query.fcgi?cmd=Retrieve&amp;db=pubmed&amp;dopt=Abstract&amp;list_uids=26378252">http://www.ncbi.nlm.nih.gov/entrez/query.fcgi?cmd=Retrieve&amp;db=pubmed&amp;dopt=Abstract&amp;list_uids=26378252</a>  6 Mol Biol Cell 26 23 Nov 2015 Journal Article,Research Support, N.I.H., Extramural,Research Support, Non-U.S. Gov't                                                                                                                                                                                                                                                                                                                                                                                                                                                                                                                                                                                                                                                                                                                                                                                                                                                                                                                                                                                                                                                                                     |
| mapk14  | sgsm3   | <a href="http://www.ncbi.nlm.nih.gov/entrez/query.fcgi?cmd=Retrieve&amp;db=pubmed&amp;dopt=Abstract&amp;list_uids=26373535">http://www.ncbi.nlm.nih.gov/entrez/query.fcgi?cmd=Retrieve&amp;db=pubmed&amp;dopt=Abstract&amp;list_uids=26373535</a>  6 BMC Cancer 15   2015 Journal Article,Research Support, Non-U.S. Gov't                                                                                                                                                                                                                                                                                                                                                                                                                                                                                                                                                                                                                                                                                                                                                                                                                                                                                                                                                                                                                                                                                                                                  |
| itgb5   | itgb6   | <a href="http://www.ncbi.nlm.nih.gov/entrez/query.fcgi?cmd=Retrieve&amp;db=pubmed&amp;dopt=Abstract&amp;list_uids=26359297">http://www.ncbi.nlm.nih.gov/entrez/query.fcgi?cmd=Retrieve&amp;db=pubmed&amp;dopt=Abstract&amp;list_uids=26359297</a>  6 J Cell Sci 128 21 Nov 2015 Journal Article,Research Support, N.I.H., Extramural                                                                                                                                                                                                                                                                                                                                                                                                                                                                                                                                                                                                                                                                                                                                                                                                                                                                                                                                                                                                                                                                                                                        |
|         |         | <a href="http://www.ncbi.nlm.nih.gov/entrez/query.fcgi?cmd=Retrieve&amp;db=pubmed&amp;dopt=Abstract&amp;list_uids=26295568">http://www.ncbi.nlm.nih.gov/entrez/query.fcgi?cmd=Retrieve&amp;db=pubmed&amp;dopt=Abstract&amp;list_uids=26295568</a>  6 Elife 4   2015 Journal Article,Research Support, N.I.H., Extramural,Research Support, Non-U.S. Gov't  <a href="http://www.ncbi.nlm.nih.gov/entrez/query.fcgi?cmd=Retrieve&amp;db=pubmed&amp;dopt=Abstract&amp;list_uids=25848013">http://www.ncbi.nlm.nih.gov/entrez/query.fcgi?cmd=Retrieve&amp;db=pubmed&amp;dopt=Abstract&amp;list_uids=25848013</a>  6 Proc Natl Acad Sci U S A 112 16 Apr 2015 Journal Article,Research Support, Non-U.S. Gov't  <a href="http://www.ncbi.nlm.nih.gov/entrez/query.fcgi?cmd=Retrieve&amp;db=pubmed&amp;dopt=Abstract&amp;list_uids=26358985">http://www.ncbi.nlm.nih.gov/entrez/query.fcgi?cmd=Retrieve&amp;db=pubmed&amp;dopt=Abstract&amp;list_uids=26358985</a>  6 Microbiology 161 11 Nov 2015 Journal Article,Research Support, N.I.H., Extramural,Research Support, Non-U.S. Gov't  <a href="http://www.ncbi.nlm.nih.gov/entrez/query.fcgi?cmd=Retrieve&amp;db=pubmed&amp;dopt=Abstract&amp;list_uids=22456508">http://www.ncbi.nlm.nih.gov/entrez/query.fcgi?cmd=Retrieve&amp;db=pubmed&amp;dopt=Abstract&amp;list_uids=22456508</a>  6 Mol Biol Cell 23 10 May 2012 Journal Article,Research Support, N.I.H., Extramural,Research Support, Non-U.S. Gov't |
| vasp    | enah    | <a href="http://www.ncbi.nlm.nih.gov/entrez/query.fcgi?cmd=Retrieve&amp;db=pubmed&amp;dopt=Abstract&amp;list_uids=26358985">http://www.ncbi.nlm.nih.gov/entrez/query.fcgi?cmd=Retrieve&amp;db=pubmed&amp;dopt=Abstract&amp;list_uids=26358985</a>  6 Microbiology 161 11 Nov 2015 Journal Article,Research Support, N.I.H., Extramural,Research Support, Non-U.S. Gov't                                                                                                                                                                                                                                                                                                                                                                                                                                                                                                                                                                                                                                                                                                                                                                                                                                                                                                                                                                                                                                                                                     |
| vasp    | evl     | <a href="http://www.ncbi.nlm.nih.gov/entrez/query.fcgi?cmd=Retrieve&amp;db=pubmed&amp;dopt=Abstract&amp;list_uids=26352169">http://www.ncbi.nlm.nih.gov/entrez/query.fcgi?cmd=Retrieve&amp;db=pubmed&amp;dopt=Abstract&amp;list_uids=26352169</a>  6 Oncol Rep 34 6 Dec 2015 Journal Article,Research Support, Non-U.S. Gov't                                                                                                                                                                                                                                                                                                                                                                                                                                                                                                                                                                                                                                                                                                                                                                                                                                                                                                                                                                                                                                                                                                                               |
| ptk2b   | ccr7    | <a href="http://www.ncbi.nlm.nih.gov/entrez/query.fcgi?cmd=Retrieve&amp;db=pubmed&amp;dopt=Abstract&amp;list_uids=26339916">http://www.ncbi.nlm.nih.gov/entrez/query.fcgi?cmd=Retrieve&amp;db=pubmed&amp;dopt=Abstract&amp;list_uids=26339916</a>  6 Magy Onkol 59 3 Sep 2015 English Abstract,Journal Article                                                                                                                                                                                                                                                                                                                                                                                                                                                                                                                                                                                                                                                                                                                                                                                                                                                                                                                                                                                                                                                                                                                                              |
| mirn34b | mirn34c | <a href="http://www.ncbi.nlm.nih.gov/entrez/query.fcgi?cmd=Retrieve&amp;db=pubmed&amp;dopt=Abstract&amp;list_uids=26330189">http://www.ncbi.nlm.nih.gov/entrez/query.fcgi?cmd=Retrieve&amp;db=pubmed&amp;dopt=Abstract&amp;list_uids=26330189</a>  6 Oncol Rep 34 5 Nov 2015 Journal Article,Research Support, Non-U.S. Gov't                                                                                                                                                                                                                                                                                                                                                                                                                                                                                                                                                                                                                                                                                                                                                                                                                                                                                                                                                                                                                                                                                                                               |
| mirn34b | mirn18a | <a href="http://www.ncbi.nlm.nih.gov/entrez/query.fcgi?cmd=Retrieve&amp;db=pubmed&amp;dopt=Abstract&amp;list_uids=26330189">http://www.ncbi.nlm.nih.gov/entrez/query.fcgi?cmd=Retrieve&amp;db=pubmed&amp;dopt=Abstract&amp;list_uids=26330189</a>  6 Oncol Rep 34 5 Nov 2015 Journal Article,Research Support, Non-U.S. Gov't                                                                                                                                                                                                                                                                                                                                                                                                                                                                                                                                                                                                                                                                                                                                                                                                                                                                                                                                                                                                                                                                                                                               |
| mirn34b | mirn31  | <a href="http://www.ncbi.nlm.nih.gov/entrez/query.fcgi?cmd=Retrieve&amp;db=pubmed&amp;dopt=Abstract&amp;list_uids=26330189">http://www.ncbi.nlm.nih.gov/entrez/query.fcgi?cmd=Retrieve&amp;db=pubmed&amp;dopt=Abstract&amp;list_uids=26330189</a>  6 Oncol Rep 34 5 Nov 2015 Journal Article,Research Support, Non-U.S. Gov't                                                                                                                                                                                                                                                                                                                                                                                                                                                                                                                                                                                                                                                                                                                                                                                                                                                                                                                                                                                                                                                                                                                               |
| mirn34b | tp53    | <a href="http://www.ncbi.nlm.nih.gov/entrez/query.fcgi?cmd=Retrieve&amp;db=pubmed&amp;dopt=Abstract&amp;list_uids=26330189">http://www.ncbi.nlm.nih.gov/entrez/query.fcgi?cmd=Retrieve&amp;db=pubmed&amp;dopt=Abstract&amp;list_uids=26330189</a>  6 Oncol Rep 34 5 Nov 2015 Journal Article,Research Support, Non-U.S. Gov't                                                                                                                                                                                                                                                                                                                                                                                                                                                                                                                                                                                                                                                                                                                                                                                                                                                                                                                                                                                                                                                                                                                               |
| mirn34b | npc1    | <a href="http://www.ncbi.nlm.nih.gov/entrez/query.fcgi?cmd=Retrieve&amp;db=pubmed&amp;dopt=Abstract&amp;list_uids=26330189">http://www.ncbi.nlm.nih.gov/entrez/query.fcgi?cmd=Retrieve&amp;db=pubmed&amp;dopt=Abstract&amp;list_uids=26330189</a>  6 Oncol Rep 34 5 Nov 2015 Journal Article,Research Support, Non-U.S. Gov't                                                                                                                                                                                                                                                                                                                                                                                                                                                                                                                                                                                                                                                                                                                                                                                                                                                                                                                                                                                                                                                                                                                               |
| mirn34c | mirn18a | <a href="http://www.ncbi.nlm.nih.gov/entrez/query.fcgi?cmd=Retrieve&amp;db=pubmed&amp;dopt=Abstract&amp;list_uids=26330189">http://www.ncbi.nlm.nih.gov/entrez/query.fcgi?cmd=Retrieve&amp;db=pubmed&amp;dopt=Abstract&amp;list_uids=26330189</a>  6 Oncol Rep 34 5 Nov 2015 Journal Article,Research Support, Non-U.S. Gov't                                                                                                                                                                                                                                                                                                                                                                                                                                                                                                                                                                                                                                                                                                                                                                                                                                                                                                                                                                                                                                                                                                                               |
| mirn34c | mirn31  | <a href="http://www.ncbi.nlm.nih.gov/entrez/query.fcgi?cmd=Retrieve&amp;db=pubmed&amp;dopt=Abstract&amp;list_uids=26330189">http://www.ncbi.nlm.nih.gov/entrez/query.fcgi?cmd=Retrieve&amp;db=pubmed&amp;dopt=Abstract&amp;list_uids=26330189</a>  6 Oncol Rep 34 5 Nov 2015 Journal Article,Research Support, Non-U.S. Gov't                                                                                                                                                                                                                                                                                                                                                                                                                                                                                                                                                                                                                                                                                                                                                                                                                                                                                                                                                                                                                                                                                                                               |
| mirn34c | tp53    | <a href="http://www.ncbi.nlm.nih.gov/entrez/query.fcgi?cmd=Retrieve&amp;db=pubmed&amp;dopt=Abstract&amp;list_uids=26330189">http://www.ncbi.nlm.nih.gov/entrez/query.fcgi?cmd=Retrieve&amp;db=pubmed&amp;dopt=Abstract&amp;list_uids=26330189</a>  6 Oncol Rep 34 5 Nov 2015 Journal Article,Research Support, Non-U.S. Gov't                                                                                                                                                                                                                                                                                                                                                                                                                                                                                                                                                                                                                                                                                                                                                                                                                                                                                                                                                                                                                                                                                                                               |

|         |        |                                                                                                                                                                                                                                                                                                                                                                                                                                                                                                                                                                                                                                                                                                                                                                                                                                                                                                                                                                                                                                                                                                                                                                                                                                                                                                                                                                                                                                                                                                                                                                                                                                                                                                                                                |
|---------|--------|------------------------------------------------------------------------------------------------------------------------------------------------------------------------------------------------------------------------------------------------------------------------------------------------------------------------------------------------------------------------------------------------------------------------------------------------------------------------------------------------------------------------------------------------------------------------------------------------------------------------------------------------------------------------------------------------------------------------------------------------------------------------------------------------------------------------------------------------------------------------------------------------------------------------------------------------------------------------------------------------------------------------------------------------------------------------------------------------------------------------------------------------------------------------------------------------------------------------------------------------------------------------------------------------------------------------------------------------------------------------------------------------------------------------------------------------------------------------------------------------------------------------------------------------------------------------------------------------------------------------------------------------------------------------------------------------------------------------------------------------|
| mirn34c | npc1   | <a href="http://www.ncbi.nlm.nih.gov/entrez/query.fcgi?cmd=Retrieve&amp;db=pubmed&amp;dopt=Abstract&amp;list_uids=26330189">http://www.ncbi.nlm.nih.gov/entrez/query.fcgi?cmd=Retrieve&amp;db=pubmed&amp;dopt=Abstract&amp;list_uids=26330189</a>  6 Oncol Rep 34 5 Nov 2015 Journal Article,Research Support, Non-U.S. Gov't                                                                                                                                                                                                                                                                                                                                                                                                                                                                                                                                                                                                                                                                                                                                                                                                                                                                                                                                                                                                                                                                                                                                                                                                                                                                                                                                                                                                                  |
| mirn18a | mirn31 | <a href="http://www.ncbi.nlm.nih.gov/entrez/query.fcgi?cmd=Retrieve&amp;db=pubmed&amp;dopt=Abstract&amp;list_uids=26330189">http://www.ncbi.nlm.nih.gov/entrez/query.fcgi?cmd=Retrieve&amp;db=pubmed&amp;dopt=Abstract&amp;list_uids=26330189</a>  6 Oncol Rep 34 5 Nov 2015 Journal Article,Research Support, Non-U.S. Gov't                                                                                                                                                                                                                                                                                                                                                                                                                                                                                                                                                                                                                                                                                                                                                                                                                                                                                                                                                                                                                                                                                                                                                                                                                                                                                                                                                                                                                  |
| mirn18a | tp53   | <a href="http://www.ncbi.nlm.nih.gov/entrez/query.fcgi?cmd=Retrieve&amp;db=pubmed&amp;dopt=Abstract&amp;list_uids=26330189">http://www.ncbi.nlm.nih.gov/entrez/query.fcgi?cmd=Retrieve&amp;db=pubmed&amp;dopt=Abstract&amp;list_uids=26330189</a>  6 Oncol Rep 34 5 Nov 2015 Journal Article,Research Support, Non-U.S. Gov't                                                                                                                                                                                                                                                                                                                                                                                                                                                                                                                                                                                                                                                                                                                                                                                                                                                                                                                                                                                                                                                                                                                                                                                                                                                                                                                                                                                                                  |
| mirn18a | npc1   | <a href="http://www.ncbi.nlm.nih.gov/entrez/query.fcgi?cmd=Retrieve&amp;db=pubmed&amp;dopt=Abstract&amp;list_uids=26330189">http://www.ncbi.nlm.nih.gov/entrez/query.fcgi?cmd=Retrieve&amp;db=pubmed&amp;dopt=Abstract&amp;list_uids=26330189</a>  6 Oncol Rep 34 5 Nov 2015 Journal Article,Research Support, Non-U.S. Gov't                                                                                                                                                                                                                                                                                                                                                                                                                                                                                                                                                                                                                                                                                                                                                                                                                                                                                                                                                                                                                                                                                                                                                                                                                                                                                                                                                                                                                  |
| mirn31  | tp53   | <a href="http://www.ncbi.nlm.nih.gov/entrez/query.fcgi?cmd=Retrieve&amp;db=pubmed&amp;dopt=Abstract&amp;list_uids=26330189">http://www.ncbi.nlm.nih.gov/entrez/query.fcgi?cmd=Retrieve&amp;db=pubmed&amp;dopt=Abstract&amp;list_uids=26330189</a>  6 Oncol Rep 34 5 Nov 2015 Journal Article,Research Support, Non-U.S. Gov't                                                                                                                                                                                                                                                                                                                                                                                                                                                                                                                                                                                                                                                                                                                                                                                                                                                                                                                                                                                                                                                                                                                                                                                                                                                                                                                                                                                                                  |
| mirn31  | npc1   | <a href="http://www.ncbi.nlm.nih.gov/entrez/query.fcgi?cmd=Retrieve&amp;db=pubmed&amp;dopt=Abstract&amp;list_uids=26330189">http://www.ncbi.nlm.nih.gov/entrez/query.fcgi?cmd=Retrieve&amp;db=pubmed&amp;dopt=Abstract&amp;list_uids=26330189</a>  6 Oncol Rep 34 5 Nov 2015 Journal Article,Research Support, Non-U.S. Gov't                                                                                                                                                                                                                                                                                                                                                                                                                                                                                                                                                                                                                                                                                                                                                                                                                                                                                                                                                                                                                                                                                                                                                                                                                                                                                                                                                                                                                  |
| tp53    | npc1   | <a href="http://www.ncbi.nlm.nih.gov/entrez/query.fcgi?cmd=Retrieve&amp;db=pubmed&amp;dopt=Abstract&amp;list_uids=26330189">http://www.ncbi.nlm.nih.gov/entrez/query.fcgi?cmd=Retrieve&amp;db=pubmed&amp;dopt=Abstract&amp;list_uids=26330189</a>  6 Oncol Rep 34 5 Nov 2015 Journal Article,Research Support, Non-U.S. Gov't                                                                                                                                                                                                                                                                                                                                                                                                                                                                                                                                                                                                                                                                                                                                                                                                                                                                                                                                                                                                                                                                                                                                                                                                                                                                                                                                                                                                                  |
| rab11a  | rac1   | <a href="http://www.ncbi.nlm.nih.gov/entrez/query.fcgi?cmd=Retrieve&amp;db=pubmed&amp;dopt=Abstract&amp;list_uids=26299802">http://www.ncbi.nlm.nih.gov/entrez/query.fcgi?cmd=Retrieve&amp;db=pubmed&amp;dopt=Abstract&amp;list_uids=26299802</a>  6 Eur J Cell Biol 94 11 Nov 2015 Journal Article,Research Support, Non-U.S. Gov't                                                                                                                                                                                                                                                                                                                                                                                                                                                                                                                                                                                                                                                                                                                                                                                                                                                                                                                                                                                                                                                                                                                                                                                                                                                                                                                                                                                                           |
| rab11a  | ptk2   | <a href="http://www.ncbi.nlm.nih.gov/entrez/query.fcgi?cmd=Retrieve&amp;db=pubmed&amp;dopt=Abstract&amp;list_uids=26299802">http://www.ncbi.nlm.nih.gov/entrez/query.fcgi?cmd=Retrieve&amp;db=pubmed&amp;dopt=Abstract&amp;list_uids=26299802</a>  6 Eur J Cell Biol 94 11 Nov 2015 Journal Article,Research Support, Non-U.S. Gov't                                                                                                                                                                                                                                                                                                                                                                                                                                                                                                                                                                                                                                                                                                                                                                                                                                                                                                                                                                                                                                                                                                                                                                                                                                                                                                                                                                                                           |
| rab11a  | fas    | <a href="http://www.ncbi.nlm.nih.gov/entrez/query.fcgi?cmd=Retrieve&amp;db=pubmed&amp;dopt=Abstract&amp;list_uids=26299802">http://www.ncbi.nlm.nih.gov/entrez/query.fcgi?cmd=Retrieve&amp;db=pubmed&amp;dopt=Abstract&amp;list_uids=26299802</a>  6 Eur J Cell Biol 94 11 Nov 2015 Journal Article,Research Support, Non-U.S. Gov't                                                                                                                                                                                                                                                                                                                                                                                                                                                                                                                                                                                                                                                                                                                                                                                                                                                                                                                                                                                                                                                                                                                                                                                                                                                                                                                                                                                                           |
| rac1    | fas    | <a href="http://www.ncbi.nlm.nih.gov/entrez/query.fcgi?cmd=Retrieve&amp;db=pubmed&amp;dopt=Abstract&amp;list_uids=25820249">http://www.ncbi.nlm.nih.gov/entrez/query.fcgi?cmd=Retrieve&amp;db=pubmed&amp;dopt=Abstract&amp;list_uids=25820249</a>  6 J Cell Physiol 230 11 Nov 2015 Journal Article,Research Support, Non-U.S. Gov't  <a href="http://www.ncbi.nlm.nih.gov/entrez/query.fcgi?cmd=Retrieve&amp;db=pubmed&amp;dopt=Abstract&amp;list_uids=25544611">http://www.ncbi.nlm.nih.gov/entrez/query.fcgi?cmd=Retrieve&amp;db=pubmed&amp;dopt=Abstract&amp;list_uids=25544611</a>  6 Cur r Biol 25 2 Jan 2015 Journal Article,Research Support, N.I.H., Extramural,Research Support, N.I.H., Intramural  <a href="http://www.ncbi.nlm.nih.gov/entrez/query.fcgi?cmd=Retrieve&amp;db=pubmed&amp;dopt=Abstract&amp;list_uids=23344455">http://www.ncbi.nlm.nih.gov/entrez/query.fcgi?cmd=Retrieve&amp;db=pubmed&amp;dopt=Abstract&amp;list_uids=23344455</a>  6 Toxins (Basel) 5 1 Jan 2013 Comparative Study,Journal Article,Research Support, Non-U.S. Gov't  <a href="http://www.ncbi.nlm.nih.gov/entrez/query.fcgi?cmd=Retrieve&amp;db=pubmed&amp;dopt=Abstract&amp;list_uids=23295182">http://www.ncbi.nlm.nih.gov/entrez/query.fcgi?cmd=Retrieve&amp;db=pubmed&amp;dopt=Abstract&amp;list_uids=23295182</a>  6 J Biol Chem 288 8 Feb 2013 Journal Article,Research Support, N.I.H., Intramural  <a href="http://www.ncbi.nlm.nih.gov/entrez/query.fcgi?cmd=Retrieve&amp;db=pubmed&amp;dopt=Abstract&amp;list_uids=26299802">http://www.ncbi.nlm.nih.gov/entrez/query.fcgi?cmd=Retrieve&amp;db=pubmed&amp;dopt=Abstract&amp;list_uids=26299802</a>  6 Eur J Cell Biol 94 11 Nov 2015 Journal Article,Research Support, Non-U.S. Gov't |
| ptk2    | fas    | <a href="http://www.ncbi.nlm.nih.gov/entrez/query.fcgi?cmd=Retrieve&amp;db=pubmed&amp;dopt=Abstract&amp;list_uids=25820249">http://www.ncbi.nlm.nih.gov/entrez/query.fcgi?cmd=Retrieve&amp;db=pubmed&amp;dopt=Abstract&amp;list_uids=25820249</a>  6 J Cell Physiol 230 11 Nov 2015 Journal Article,Research Support, Non-U.S. Gov't  <a href="http://www.ncbi.nlm.nih.gov/entrez/query.fcgi?cmd=Retrieve&amp;db=pubmed&amp;dopt=Abstract&amp;list_uids=22399300">http://www.ncbi.nlm.nih.gov/entrez/query.fcgi?cmd=Retrieve&amp;db=pubmed&amp;dopt=Abstract&amp;list_uids=22399300</a>  6 J Biol Chem 287 19 May 2012 Journal Article,Research Support, Non-U.S. Gov't  <a href="http://www.ncbi.nlm.nih.gov/entrez/query.fcgi?cmd=Retrieve&amp;db=pubmed&amp;dopt=Abstract&amp;list_uids=24642576">http://www.ncbi.nlm.nih.gov/entrez/query.fcgi?cmd=Retrieve&amp;db=pubmed&amp;dopt=Abstract&amp;list_uids=24642576</a>  6 PL oS One 9 3  2014 Journal Article,Research Support, Non-U.S.                                                                                                                                                                                                                                                                                                                                                                                                                                                                                                                                                                                                                                                                                                                                                   |

|       |         |                                                                                                                                                                                                                                                                                                                                                                                                                                                                                                                                                                                                                                                                                                                                                                                                                                                                                                                                                                                                                                                                                                                                                                                                                                                                                                                                                                                                                                                                                                                                                                                                                                                                                                                                                                                                                                                                                                                                                                                                                                                                                                                                                                                                                                                                                                                                                                                                                                                                            |
|-------|---------|----------------------------------------------------------------------------------------------------------------------------------------------------------------------------------------------------------------------------------------------------------------------------------------------------------------------------------------------------------------------------------------------------------------------------------------------------------------------------------------------------------------------------------------------------------------------------------------------------------------------------------------------------------------------------------------------------------------------------------------------------------------------------------------------------------------------------------------------------------------------------------------------------------------------------------------------------------------------------------------------------------------------------------------------------------------------------------------------------------------------------------------------------------------------------------------------------------------------------------------------------------------------------------------------------------------------------------------------------------------------------------------------------------------------------------------------------------------------------------------------------------------------------------------------------------------------------------------------------------------------------------------------------------------------------------------------------------------------------------------------------------------------------------------------------------------------------------------------------------------------------------------------------------------------------------------------------------------------------------------------------------------------------------------------------------------------------------------------------------------------------------------------------------------------------------------------------------------------------------------------------------------------------------------------------------------------------------------------------------------------------------------------------------------------------------------------------------------------------|
|       |         | Gov't  <a href="http://www.ncbi.nlm.nih.gov/entrez/query.fcgi?cmd=Retrieve&amp;db=pubmed&amp;dopt=Abstract&amp;list_uids=23754369">http://www.ncbi.nlm.nih.gov/entrez/query.fcgi?cmd=Retrieve&amp;db=pubmed&amp;dopt=Abstract&amp;list_uids=23754369</a>  6 Proc Natl Acad Sci U S A 110 26 Jun 2013 Journal Article,Research Support, N.I.H., Intramural,Research Support, Non-U.S.<br>Gov't  <a href="http://www.ncbi.nlm.nih.gov/entrez/query.fcgi?cmd=Retrieve&amp;db=pubmed&amp;dopt=Abstract&amp;list_uids=26172215">http://www.ncbi.nlm.nih.gov/entrez/query.fcgi?cmd=Retrieve&amp;db=pubmed&amp;dopt=Abstract&amp;list_uids=26172215</a>  6 Exp Cell Res 336 2 Aug 2015 Journal Article,Research Support, Non-U.S.<br>Gov't  <a href="http://www.ncbi.nlm.nih.gov/entrez/query.fcgi?cmd=Retrieve&amp;db=pubmed&amp;dopt=Abstract&amp;list_uids=25391654">http://www.ncbi.nlm.nih.gov/entrez/query.fcgi?cmd=Retrieve&amp;db=pubmed&amp;dopt=Abstract&amp;list_uids=25391654</a>  6 J Biol Chem 290 1 Jan 2015 Journal Article,Research Support, Non-U.S.<br>Gov't  <a href="http://www.ncbi.nlm.nih.gov/entrez/query.fcgi?cmd=Retrieve&amp;db=pubmed&amp;dopt=Abstract&amp;list_uids=26299802">http://www.ncbi.nlm.nih.gov/entrez/query.fcgi?cmd=Retrieve&amp;db=pubmed&amp;dopt=Abstract&amp;list_uids=26299802</a>  6 Eur J Cell Biol 94 11 Nov 2015 Journal Article,Research Support, Non-U.S.<br>Gov't  <a href="http://www.ncbi.nlm.nih.gov/entrez/query.fcgi?cmd=Retrieve&amp;db=pubmed&amp;dopt=Abstract&amp;list_uids=25942420">http://www.ncbi.nlm.nih.gov/entrez/query.fcgi?cmd=Retrieve&amp;db=pubmed&amp;dopt=Abstract&amp;list_uids=25942420</a>  6 PLoS One 10 5  2015 Journal Article,Research Support, Non-U.S.<br>Gov't  <a href="http://www.ncbi.nlm.nih.gov/entrez/query.fcgi?cmd=Retrieve&amp;db=pubmed&amp;dopt=Abstract&amp;list_uids=23836527">http://www.ncbi.nlm.nih.gov/entrez/query.fcgi?cmd=Retrieve&amp;db=pubmed&amp;dopt=Abstract&amp;list_uids=23836527</a>  6 Stem Cells 31 11 Nov 2013 Journal Article,Research Support, N.I.H., Extramural  <a href="http://www.ncbi.nlm.nih.gov/entrez/query.fcgi?cmd=Retrieve&amp;db=pubmed&amp;dopt=Abstract&amp;list_uids=24486488">http://www.ncbi.nlm.nih.gov/entrez/query.fcgi?cmd=Retrieve&amp;db=pubmed&amp;dopt=Abstract&amp;list_uids=24486488</a>  6 Biochem Biophys Res Commun 444 4 Feb 2014 Journal Article,Research Support, N.I.H., Extramural,Research Support, Non-U.S. Gov't |
| actin | enah    | <a href="http://www.ncbi.nlm.nih.gov/entrez/query.fcgi?cmd=Retrieve&amp;db=pubmed&amp;dopt=Abstract&amp;list_uids=26295568">http://www.ncbi.nlm.nih.gov/entrez/query.fcgi?cmd=Retrieve&amp;db=pubmed&amp;dopt=Abstract&amp;list_uids=26295568</a>  6 Elife 4  2015 Journal Article,Research Support, N.I.H., Extramural,Research Support, Non-U.S. Gov't                                                                                                                                                                                                                                                                                                                                                                                                                                                                                                                                                                                                                                                                                                                                                                                                                                                                                                                                                                                                                                                                                                                                                                                                                                                                                                                                                                                                                                                                                                                                                                                                                                                                                                                                                                                                                                                                                                                                                                                                                                                                                                                   |
| enah  | pgk1    | <a href="http://www.ncbi.nlm.nih.gov/entrez/query.fcgi?cmd=Retrieve&amp;db=pubmed&amp;dopt=Abstract&amp;list_uids=26295568">http://www.ncbi.nlm.nih.gov/entrez/query.fcgi?cmd=Retrieve&amp;db=pubmed&amp;dopt=Abstract&amp;list_uids=26295568</a>  6 Elife 4  2015 Journal Article,Research Support, N.I.H., Extramural,Research Support, Non-U.S. Gov't                                                                                                                                                                                                                                                                                                                                                                                                                                                                                                                                                                                                                                                                                                                                                                                                                                                                                                                                                                                                                                                                                                                                                                                                                                                                                                                                                                                                                                                                                                                                                                                                                                                                                                                                                                                                                                                                                                                                                                                                                                                                                                                   |
| enah  | apbb1ip | <a href="http://www.ncbi.nlm.nih.gov/entrez/query.fcgi?cmd=Retrieve&amp;db=pubmed&amp;dopt=Abstract&amp;list_uids=26295568">http://www.ncbi.nlm.nih.gov/entrez/query.fcgi?cmd=Retrieve&amp;db=pubmed&amp;dopt=Abstract&amp;list_uids=26295568</a>  6 Elife 4  2015 Journal Article,Research Support, N.I.H., Extramural,Research Support, Non-U.S. Gov't                                                                                                                                                                                                                                                                                                                                                                                                                                                                                                                                                                                                                                                                                                                                                                                                                                                                                                                                                                                                                                                                                                                                                                                                                                                                                                                                                                                                                                                                                                                                                                                                                                                                                                                                                                                                                                                                                                                                                                                                                                                                                                                   |
| vasp  | pgk1    | <a href="http://www.ncbi.nlm.nih.gov/entrez/query.fcgi?cmd=Retrieve&amp;db=pubmed&amp;dopt=Abstract&amp;list_uids=26295568">http://www.ncbi.nlm.nih.gov/entrez/query.fcgi?cmd=Retrieve&amp;db=pubmed&amp;dopt=Abstract&amp;list_uids=26295568</a>  6 Elife 4  2015 Journal Article,Research Support, N.I.H., Extramural,Research Support, Non-U.S. Gov't                                                                                                                                                                                                                                                                                                                                                                                                                                                                                                                                                                                                                                                                                                                                                                                                                                                                                                                                                                                                                                                                                                                                                                                                                                                                                                                                                                                                                                                                                                                                                                                                                                                                                                                                                                                                                                                                                                                                                                                                                                                                                                                   |
| vasp  | apbb1ip | <a href="http://www.ncbi.nlm.nih.gov/entrez/query.fcgi?cmd=Retrieve&amp;db=pubmed&amp;dopt=Abstract&amp;list_uids=26295568">http://www.ncbi.nlm.nih.gov/entrez/query.fcgi?cmd=Retrieve&amp;db=pubmed&amp;dopt=Abstract&amp;list_uids=26295568</a>  6 Elife 4  2015 Journal Article,Research Support, N.I.H., Extramural,Research Support, Non-U.S. Gov't                                                                                                                                                                                                                                                                                                                                                                                                                                                                                                                                                                                                                                                                                                                                                                                                                                                                                                                                                                                                                                                                                                                                                                                                                                                                                                                                                                                                                                                                                                                                                                                                                                                                                                                                                                                                                                                                                                                                                                                                                                                                                                                   |
| pgk1  | apbb1ip | <a href="http://www.ncbi.nlm.nih.gov/entrez/query.fcgi?cmd=Retrieve&amp;db=pubmed&amp;dopt=Abstract&amp;list_uids=26295568">http://www.ncbi.nlm.nih.gov/entrez/query.fcgi?cmd=Retrieve&amp;db=pubmed&amp;dopt=Abstract&amp;list_uids=26295568</a>  6 Elife 4  2015 Journal Article,Research Support, N.I.H., Extramural,Research Support, Non-U.S. Gov't                                                                                                                                                                                                                                                                                                                                                                                                                                                                                                                                                                                                                                                                                                                                                                                                                                                                                                                                                                                                                                                                                                                                                                                                                                                                                                                                                                                                                                                                                                                                                                                                                                                                                                                                                                                                                                                                                                                                                                                                                                                                                                                   |
| actin | raph1   | <a href="http://www.ncbi.nlm.nih.gov/entrez/query.fcgi?cmd=Retrieve&amp;db=pubmed&amp;dopt=Abstract&amp;list_uids=26295568">http://www.ncbi.nlm.nih.gov/entrez/query.fcgi?cmd=Retrieve&amp;db=pubmed&amp;dopt=Abstract&amp;list_uids=26295568</a>  6 Elife 4  2015 Journal Article,Research Support, N.I.H., Extramural,Research Support, Non-U.S. Gov't                                                                                                                                                                                                                                                                                                                                                                                                                                                                                                                                                                                                                                                                                                                                                                                                                                                                                                                                                                                                                                                                                                                                                                                                                                                                                                                                                                                                                                                                                                                                                                                                                                                                                                                                                                                                                                                                                                                                                                                                                                                                                                                   |
| raph1 | vasp    | <a href="http://www.ncbi.nlm.nih.gov/entrez/query.fcgi?cmd=Retrieve&amp;db=pubmed&amp;dopt=Abstract&amp;list_uids=26295568">http://www.ncbi.nlm.nih.gov/entrez/query.fcgi?cmd=Retrieve&amp;db=pubmed&amp;dopt=Abstract&amp;list_uids=26295568</a>  6 Elife 4  2015 Journal Article,Research Support, N.I.H., Extramural,Research Support, Non-U.S. Gov't                                                                                                                                                                                                                                                                                                                                                                                                                                                                                                                                                                                                                                                                                                                                                                                                                                                                                                                                                                                                                                                                                                                                                                                                                                                                                                                                                                                                                                                                                                                                                                                                                                                                                                                                                                                                                                                                                                                                                                                                                                                                                                                   |
| raph1 | ervk2   | <a href="http://www.ncbi.nlm.nih.gov/entrez/query.fcgi?cmd=Retrieve&amp;db=pubmed&amp;dopt=Abstract&amp;list_uids=26295568">http://www.ncbi.nlm.nih.gov/entrez/query.fcgi?cmd=Retrieve&amp;db=pubmed&amp;dopt=Abstract&amp;list_uids=26295568</a>  6 Elife 4  2015 Journal Article,Research Support, N.I.H., Extramural,Research Support, Non-U.S. Gov't                                                                                                                                                                                                                                                                                                                                                                                                                                                                                                                                                                                                                                                                                                                                                                                                                                                                                                                                                                                                                                                                                                                                                                                                                                                                                                                                                                                                                                                                                                                                                                                                                                                                                                                                                                                                                                                                                                                                                                                                                                                                                                                   |
| actin | ervk2   | <a href="http://www.ncbi.nlm.nih.gov/entrez/query.fcgi?cmd=Retrieve&amp;db=pubmed&amp;dopt=Abstract&amp;list_uids=26295568">http://www.ncbi.nlm.nih.gov/entrez/query.fcgi?cmd=Retrieve&amp;db=pubmed&amp;dopt=Abstract&amp;list_uids=26295568</a>  6 Elife 4  2015 Journal Article,Research Support, N.I.H., Extramural,Research Support, Non-U.S. Gov't                                                                                                                                                                                                                                                                                                                                                                                                                                                                                                                                                                                                                                                                                                                                                                                                                                                                                                                                                                                                                                                                                                                                                                                                                                                                                                                                                                                                                                                                                                                                                                                                                                                                                                                                                                                                                                                                                                                                                                                                                                                                                                                   |
| vasp  | ervk2   | <a href="http://www.ncbi.nlm.nih.gov/entrez/query.fcgi?cmd=Retrieve&amp;db=pubmed&amp;dopt=Abstract&amp;list_uids=26295568">http://www.ncbi.nlm.nih.gov/entrez/query.fcgi?cmd=Retrieve&amp;db=pubmed&amp;dopt=Abstract&amp;list_uids=26295568</a>  6 Elife 4  2015 Journal Article,Research Support, N.I.H., Extramural,Research Support, Non-U.S. Gov't                                                                                                                                                                                                                                                                                                                                                                                                                                                                                                                                                                                                                                                                                                                                                                                                                                                                                                                                                                                                                                                                                                                                                                                                                                                                                                                                                                                                                                                                                                                                                                                                                                                                                                                                                                                                                                                                                                                                                                                                                                                                                                                   |

|         |         |                                                                                                                                                                                                                                                                                                                                                                                                                                                                                                                                                                                                                                                                                                                                                                                                                                                                                                                                                                                                                                                                                                                                                                                                                                                                                                                                                                                                                                                                                                                                                                                                                                                                                                                                                                                                                                                                                                                                                                                                                                                                                     |
|---------|---------|-------------------------------------------------------------------------------------------------------------------------------------------------------------------------------------------------------------------------------------------------------------------------------------------------------------------------------------------------------------------------------------------------------------------------------------------------------------------------------------------------------------------------------------------------------------------------------------------------------------------------------------------------------------------------------------------------------------------------------------------------------------------------------------------------------------------------------------------------------------------------------------------------------------------------------------------------------------------------------------------------------------------------------------------------------------------------------------------------------------------------------------------------------------------------------------------------------------------------------------------------------------------------------------------------------------------------------------------------------------------------------------------------------------------------------------------------------------------------------------------------------------------------------------------------------------------------------------------------------------------------------------------------------------------------------------------------------------------------------------------------------------------------------------------------------------------------------------------------------------------------------------------------------------------------------------------------------------------------------------------------------------------------------------------------------------------------------------|
|         |         | 015 Journal Article,Research Support, N.I.H., Extramural,Research Support, Non-U.S. Gov't                                                                                                                                                                                                                                                                                                                                                                                                                                                                                                                                                                                                                                                                                                                                                                                                                                                                                                                                                                                                                                                                                                                                                                                                                                                                                                                                                                                                                                                                                                                                                                                                                                                                                                                                                                                                                                                                                                                                                                                           |
| sparcl1 | hdac9   | <a href="http://www.ncbi.nlm.nih.gov/entrez/query.fcgi?cmd=Retrieve&amp;db=pubmed&amp;dopt=Abstract&amp;list_uids=26294211">http://www.ncbi.nlm.nih.gov/entrez/query.fcgi?cmd=Retrieve&amp;db=pubmed&amp;dopt=Abstract&amp;list_uids=26294211</a>  6 Cancer Res 75 20 Oct 2015 Journal Article,Research Support, N.I.H., Extramural,Research Support, Non-U.S. Gov't                                                                                                                                                                                                                                                                                                                                                                                                                                                                                                                                                                                                                                                                                                                                                                                                                                                                                                                                                                                                                                                                                                                                                                                                                                                                                                                                                                                                                                                                                                                                                                                                                                                                                                                |
| sparcl1 | mmrn1   | <a href="http://www.ncbi.nlm.nih.gov/entrez/query.fcgi?cmd=Retrieve&amp;db=pubmed&amp;dopt=Abstract&amp;list_uids=26294211">http://www.ncbi.nlm.nih.gov/entrez/query.fcgi?cmd=Retrieve&amp;db=pubmed&amp;dopt=Abstract&amp;list_uids=26294211</a>  6 Cancer Res 75 20 Oct 2015 Journal Article,Research Support, N.I.H., Extramural,Research Support, Non-U.S. Gov't                                                                                                                                                                                                                                                                                                                                                                                                                                                                                                                                                                                                                                                                                                                                                                                                                                                                                                                                                                                                                                                                                                                                                                                                                                                                                                                                                                                                                                                                                                                                                                                                                                                                                                                |
| jun     | mapk8   | <a href="http://www.ncbi.nlm.nih.gov/entrez/query.fcgi?cmd=Retrieve&amp;db=pubmed&amp;dopt=Abstract&amp;list_uids=24894398">http://www.ncbi.nlm.nih.gov/entrez/query.fcgi?cmd=Retrieve&amp;db=pubmed&amp;dopt=Abstract&amp;list_uids=24894398</a>  6 Invest Ophthalmol Vis Sci 55 7 Jul 2014 Journal Article,Research Support, Non-U.S. Gov't  <a href="http://www.ncbi.nlm.nih.gov/entrez/query.fcgi?cmd=Retrieve&amp;db=pubmed&amp;dopt=Abstract&amp;list_uids=25586177">http://www.ncbi.nlm.nih.gov/entrez/query.fcgi?cmd=Retrieve&amp;db=pubmed&amp;dopt=Abstract&amp;list_uids=25586177</a>  6 J Biol Chem 290 10 Mar 2015 Journal Article,Research Support, Non-U.S. Gov't  <a href="http://www.ncbi.nlm.nih.gov/entrez/query.fcgi?cmd=Retrieve&amp;db=pubmed&amp;dopt=Abstract&amp;list_uids=25237887">http://www.ncbi.nlm.nih.gov/entrez/query.fcgi?cmd=Retrieve&amp;db=pubmed&amp;dopt=Abstract&amp;list_uids=25237887</a>  6 PLoS One 9 9  2014 Journal Article,Research Support, Non-U.S. Gov't  <a href="http://www.ncbi.nlm.nih.gov/entrez/query.fcgi?cmd=Retrieve&amp;db=pubmed&amp;dopt=Abstract&amp;list_uids=24193434">http://www.ncbi.nlm.nih.gov/entrez/query.fcgi?cmd=Retrieve&amp;db=pubmed&amp;dopt=Abstract&amp;list_uids=24193434</a>  6 Cell Adh Migr 7 5  2013 Journal Article,Research Support, Non-U.S. Gov't  <a href="http://www.ncbi.nlm.nih.gov/entrez/query.fcgi?cmd=Retrieve&amp;db=pubmed&amp;dopt=Abstract&amp;list_uids=25190348">http://www.ncbi.nlm.nih.gov/entrez/query.fcgi?cmd=Retrieve&amp;db=pubmed&amp;dopt=Abstract&amp;list_uids=25190348</a>  6 Biochem J 464 1 Nov 2014 Journal Article,Research Support, N.I.H., Extramural,Research Support, Non-U.S. Gov't  <a href="http://www.ncbi.nlm.nih.gov/entrez/query.fcgi?cmd=Retrieve&amp;db=pubmed&amp;dopt=Abstract&amp;list_uids=26255846">http://www.ncbi.nlm.nih.gov/entrez/query.fcgi?cmd=Retrieve&amp;db=pubmed&amp;dopt=Abstract&amp;list_uids=26255846</a>  6 Curr Biol 25 17 Aug 2015 Journal Article,Research Support, N.I.H., Extramural,Research Support, Non-U.S. Gov't |
| jun     | lims1   | <a href="http://www.ncbi.nlm.nih.gov/entrez/query.fcgi?cmd=Retrieve&amp;db=pubmed&amp;dopt=Abstract&amp;list_uids=26255846">http://www.ncbi.nlm.nih.gov/entrez/query.fcgi?cmd=Retrieve&amp;db=pubmed&amp;dopt=Abstract&amp;list_uids=26255846</a>  6 Curr Biol 25 17 Aug 2015 Journal Article,Research Support, N.I.H., Extramural,Research Support, Non-U.S. Gov't                                                                                                                                                                                                                                                                                                                                                                                                                                                                                                                                                                                                                                                                                                                                                                                                                                                                                                                                                                                                                                                                                                                                                                                                                                                                                                                                                                                                                                                                                                                                                                                                                                                                                                                 |
| mapk8   | lims1   | <a href="http://www.ncbi.nlm.nih.gov/entrez/query.fcgi?cmd=Retrieve&amp;db=pubmed&amp;dopt=Abstract&amp;list_uids=26255846">http://www.ncbi.nlm.nih.gov/entrez/query.fcgi?cmd=Retrieve&amp;db=pubmed&amp;dopt=Abstract&amp;list_uids=26255846</a>  6 Curr Biol 25 17 Aug 2015 Journal Article,Research Support, N.I.H., Extramural,Research Support, Non-U.S. Gov't                                                                                                                                                                                                                                                                                                                                                                                                                                                                                                                                                                                                                                                                                                                                                                                                                                                                                                                                                                                                                                                                                                                                                                                                                                                                                                                                                                                                                                                                                                                                                                                                                                                                                                                 |
| arf6    | arhgef2 | <a href="http://www.ncbi.nlm.nih.gov/entrez/query.fcgi?cmd=Retrieve&amp;db=pubmed&amp;dopt=Abstract&amp;list_uids=26239146">http://www.ncbi.nlm.nih.gov/entrez/query.fcgi?cmd=Retrieve&amp;db=pubmed&amp;dopt=Abstract&amp;list_uids=26239146</a>  6 Nat Commun 6   2015 Journal Article,Research Support, Non-U.S. Gov't                                                                                                                                                                                                                                                                                                                                                                                                                                                                                                                                                                                                                                                                                                                                                                                                                                                                                                                                                                                                                                                                                                                                                                                                                                                                                                                                                                                                                                                                                                                                                                                                                                                                                                                                                           |
| arf6    | cyth3   | <a href="http://www.ncbi.nlm.nih.gov/entrez/query.fcgi?cmd=Retrieve&amp;db=pubmed&amp;dopt=Abstract&amp;list_uids=26239146">http://www.ncbi.nlm.nih.gov/entrez/query.fcgi?cmd=Retrieve&amp;db=pubmed&amp;dopt=Abstract&amp;list_uids=26239146</a>  6 Nat Commun 6   2015 Journal Article,Research Support, Non-U.S. Gov't                                                                                                                                                                                                                                                                                                                                                                                                                                                                                                                                                                                                                                                                                                                                                                                                                                                                                                                                                                                                                                                                                                                                                                                                                                                                                                                                                                                                                                                                                                                                                                                                                                                                                                                                                           |
| arhgef2 | cyth3   | <a href="http://www.ncbi.nlm.nih.gov/entrez/query.fcgi?cmd=Retrieve&amp;db=pubmed&amp;dopt=Abstract&amp;list_uids=26239146">http://www.ncbi.nlm.nih.gov/entrez/query.fcgi?cmd=Retrieve&amp;db=pubmed&amp;dopt=Abstract&amp;list_uids=26239146</a>  6 Nat Commun 6   2015 Journal Article,Research Support, Non-U.S. Gov't                                                                                                                                                                                                                                                                                                                                                                                                                                                                                                                                                                                                                                                                                                                                                                                                                                                                                                                                                                                                                                                                                                                                                                                                                                                                                                                                                                                                                                                                                                                                                                                                                                                                                                                                                           |
| hgf     | arf6    | <a href="http://www.ncbi.nlm.nih.gov/entrez/query.fcgi?cmd=Retrieve&amp;db=pubmed&amp;dopt=Abstract&amp;list_uids=26239146">http://www.ncbi.nlm.nih.gov/entrez/query.fcgi?cmd=Retrieve&amp;db=pubmed&amp;dopt=Abstract&amp;list_uids=26239146</a>  6 Nat Commun 6   2015 Journal Article,Research Support, Non-U.S. Gov't                                                                                                                                                                                                                                                                                                                                                                                                                                                                                                                                                                                                                                                                                                                                                                                                                                                                                                                                                                                                                                                                                                                                                                                                                                                                                                                                                                                                                                                                                                                                                                                                                                                                                                                                                           |
| eng     | ptk2    | <a href="http://www.ncbi.nlm.nih.gov/entrez/query.fcgi?cmd=Retrieve&amp;db=pubmed&amp;dopt=Abstract&amp;list_uids=26230358">http://www.ncbi.nlm.nih.gov/entrez/query.fcgi?cmd=Retrieve&amp;db=pubmed&amp;dopt=Abstract&amp;list_uids=26230358</a>  6 Stem Cells Dev 24 21 Nov 2015 Journal Article,Research Support, Non-U.S. Gov't                                                                                                                                                                                                                                                                                                                                                                                                                                                                                                                                                                                                                                                                                                                                                                                                                                                                                                                                                                                                                                                                                                                                                                                                                                                                                                                                                                                                                                                                                                                                                                                                                                                                                                                                                 |
| mapk3   | eng     | <a href="http://www.ncbi.nlm.nih.gov/entrez/query.fcgi?cmd=Retrieve&amp;db=pubmed&amp;dopt=Abstract&amp;list_uids=26230358">http://www.ncbi.nlm.nih.gov/entrez/query.fcgi?cmd=Retrieve&amp;db=pubmed&amp;dopt=Abstract&amp;list_uids=26230358</a>  6 Stem Cells Dev 24 21 Nov 2015 Journal Article,Research Support, Non-U.S. Gov't                                                                                                                                                                                                                                                                                                                                                                                                                                                                                                                                                                                                                                                                                                                                                                                                                                                                                                                                                                                                                                                                                                                                                                                                                                                                                                                                                                                                                                                                                                                                                                                                                                                                                                                                                 |
| mapk3   | mapk14  | <a href="http://www.ncbi.nlm.nih.gov/entrez/query.fcgi?cmd=Retrieve&amp;db=pubmed&amp;dopt=Abstract&amp;list_uids=26230358">http://www.ncbi.nlm.nih.gov/entrez/query.fcgi?cmd=Retrieve&amp;db=pubmed&amp;dopt=Abstract&amp;list_uids=26230358</a>  6 Stem Cells Dev 24 21 Nov 2015 Journal Article,Research Support, Non-U.S. Gov't                                                                                                                                                                                                                                                                                                                                                                                                                                                                                                                                                                                                                                                                                                                                                                                                                                                                                                                                                                                                                                                                                                                                                                                                                                                                                                                                                                                                                                                                                                                                                                                                                                                                                                                                                 |
| mapk3   | ptk2    | <a href="http://www.ncbi.nlm.nih.gov/entrez/query.fcgi?cmd=Retrieve&amp;db=pubmed&amp;dopt=Abstract&amp;list_uids=26230358">http://www.ncbi.nlm.nih.gov/entrez/query.fcgi?cmd=Retrieve&amp;db=pubmed&amp;dopt=Abstract&amp;list_uids=26230358</a>  6 Stem                                                                                                                                                                                                                                                                                                                                                                                                                                                                                                                                                                                                                                                                                                                                                                                                                                                                                                                                                                                                                                                                                                                                                                                                                                                                                                                                                                                                                                                                                                                                                                                                                                                                                                                                                                                                                           |



|        |        |                                                                                                                                                                                                                                                                                                                                                                                                                                                                                                                                                                                                                                                                                                            |
|--------|--------|------------------------------------------------------------------------------------------------------------------------------------------------------------------------------------------------------------------------------------------------------------------------------------------------------------------------------------------------------------------------------------------------------------------------------------------------------------------------------------------------------------------------------------------------------------------------------------------------------------------------------------------------------------------------------------------------------------|
|        |        | Cells Dev 24 21 Nov 2015 Journal Article,Research Support, Non-U.S. Gov't  <a href="http://www.ncbi.nlm.nih.gov/entrez/query.fcgi?cmd=Retrieve&amp;db=pubmed&amp;dopt=Abstract&amp;list_uids=22287273">http://www.ncbi.nlm.nih.gov/entrez/query.fcgi?cmd=Retrieve&amp;db=pubmed&amp;dopt=Abstract&amp;list_uids=22287273</a>  6 J Cell Physiol 227 11 Nov 2012 Journal Article,Research Support, N.I.H., Extramural                                                                                                                                                                                                                                                                                        |
| eng    | mapk14 | <a href="http://www.ncbi.nlm.nih.gov/entrez/query.fcgi?cmd=Retrieve&amp;db=pubmed&amp;dopt=Abstract&amp;list_uids=26230358">http://www.ncbi.nlm.nih.gov/entrez/query.fcgi?cmd=Retrieve&amp;db=pubmed&amp;dopt=Abstract&amp;list_uids=26230358</a>  6 Stem Cells Dev 24 21 Nov 2015 Journal Article,Research Support, Non-U.S. Gov't                                                                                                                                                                                                                                                                                                                                                                        |
| mapk14 | ptk2   | <a href="http://www.ncbi.nlm.nih.gov/entrez/query.fcgi?cmd=Retrieve&amp;db=pubmed&amp;dopt=Abstract&amp;list_uids=26230358">http://www.ncbi.nlm.nih.gov/entrez/query.fcgi?cmd=Retrieve&amp;db=pubmed&amp;dopt=Abstract&amp;list_uids=26230358</a>  6 Stem Cells Dev 24 21 Nov 2015 Journal Article,Research Support, Non-U.S. Gov't                                                                                                                                                                                                                                                                                                                                                                        |
| elmo1  | src    | <a href="http://www.ncbi.nlm.nih.gov/entrez/query.fcgi?cmd=Retrieve&amp;db=pubmed&amp;dopt=Abstract&amp;list_uids=26205662">http://www.ncbi.nlm.nih.gov/entrez/query.fcgi?cmd=Retrieve&amp;db=pubmed&amp;dopt=Abstract&amp;list_uids=26205662</a>  6 Cell Commun Signal 13   2015 Journal Article,Research Support, Non-U.S. Gov't                                                                                                                                                                                                                                                                                                                                                                         |
| elmo1  | rac1   | <a href="http://www.ncbi.nlm.nih.gov/entrez/query.fcgi?cmd=Retrieve&amp;db=pubmed&amp;dopt=Abstract&amp;list_uids=26205662">http://www.ncbi.nlm.nih.gov/entrez/query.fcgi?cmd=Retrieve&amp;db=pubmed&amp;dopt=Abstract&amp;list_uids=26205662</a>  6 Cell Commun Signal 13   2015 Journal Article,Research Support, Non-U.S. Gov't                                                                                                                                                                                                                                                                                                                                                                         |
| src    | rac1   | <a href="http://www.ncbi.nlm.nih.gov/entrez/query.fcgi?cmd=Retrieve&amp;db=pubmed&amp;dopt=Abstract&amp;list_uids=26205662">http://www.ncbi.nlm.nih.gov/entrez/query.fcgi?cmd=Retrieve&amp;db=pubmed&amp;dopt=Abstract&amp;list_uids=26205662</a>  6 Cell Commun Signal 13   2015 Journal Article,Research Support, Non-U.S. Gov't                                                                                                                                                                                                                                                                                                                                                                         |
| src    | hck    | <a href="http://www.ncbi.nlm.nih.gov/entrez/query.fcgi?cmd=Retrieve&amp;db=pubmed&amp;dopt=Abstract&amp;list_uids=26205662">http://www.ncbi.nlm.nih.gov/entrez/query.fcgi?cmd=Retrieve&amp;db=pubmed&amp;dopt=Abstract&amp;list_uids=26205662</a>  6 Cell Commun Signal 13   2015 Journal Article,Research Support, Non-U.S. Gov't                                                                                                                                                                                                                                                                                                                                                                         |
| hck    | elmo1  | <a href="http://www.ncbi.nlm.nih.gov/entrez/query.fcgi?cmd=Retrieve&amp;db=pubmed&amp;dopt=Abstract&amp;list_uids=26205662">http://www.ncbi.nlm.nih.gov/entrez/query.fcgi?cmd=Retrieve&amp;db=pubmed&amp;dopt=Abstract&amp;list_uids=26205662</a>  6 Cell Commun Signal 13   2015 Journal Article,Research Support, Non-U.S. Gov't                                                                                                                                                                                                                                                                                                                                                                         |
| hck    | rac1   | <a href="http://www.ncbi.nlm.nih.gov/entrez/query.fcgi?cmd=Retrieve&amp;db=pubmed&amp;dopt=Abstract&amp;list_uids=26205662">http://www.ncbi.nlm.nih.gov/entrez/query.fcgi?cmd=Retrieve&amp;db=pubmed&amp;dopt=Abstract&amp;list_uids=26205662</a>  6 Cell Commun Signal 13   2015 Journal Article,Research Support, Non-U.S. Gov't                                                                                                                                                                                                                                                                                                                                                                         |
| elmo1  | mmrn1  | <a href="http://www.ncbi.nlm.nih.gov/entrez/query.fcgi?cmd=Retrieve&amp;db=pubmed&amp;dopt=Abstract&amp;list_uids=26205662">http://www.ncbi.nlm.nih.gov/entrez/query.fcgi?cmd=Retrieve&amp;db=pubmed&amp;dopt=Abstract&amp;list_uids=26205662</a>  6 Cell Commun Signal 13   2015 Journal Article,Research Support, Non-U.S. Gov't                                                                                                                                                                                                                                                                                                                                                                         |
| elmo1  | fyn    | <a href="http://www.ncbi.nlm.nih.gov/entrez/query.fcgi?cmd=Retrieve&amp;db=pubmed&amp;dopt=Abstract&amp;list_uids=26205662">http://www.ncbi.nlm.nih.gov/entrez/query.fcgi?cmd=Retrieve&amp;db=pubmed&amp;dopt=Abstract&amp;list_uids=26205662</a>  6 Cell Commun Signal 13   2015 Journal Article,Research Support, Non-U.S. Gov't                                                                                                                                                                                                                                                                                                                                                                         |
| rac1   | mmrn1  | <a href="http://www.ncbi.nlm.nih.gov/entrez/query.fcgi?cmd=Retrieve&amp;db=pubmed&amp;dopt=Abstract&amp;list_uids=25544611">http://www.ncbi.nlm.nih.gov/entrez/query.fcgi?cmd=Retrieve&amp;db=pubmed&amp;dopt=Abstract&amp;list_uids=25544611</a>  6 Curr Biol 25 2 Jan 2015 Journal Article,Research Support, N.I.H., Extramural,Research Support, N.I.H., Intramural  <a href="http://www.ncbi.nlm.nih.gov/entrez/query.fcgi?cmd=Retrieve&amp;db=pubmed&amp;dopt=Abstract&amp;list_uids=26205662">http://www.ncbi.nlm.nih.gov/entrez/query.fcgi?cmd=Retrieve&amp;db=pubmed&amp;dopt=Abstract&amp;list_uids=26205662</a>  6 Cell Commun Signal 13   2015 Journal Article,Research Support, Non-U.S. Gov't |
| rac1   | fyn    | <a href="http://www.ncbi.nlm.nih.gov/entrez/query.fcgi?cmd=Retrieve&amp;db=pubmed&amp;dopt=Abstract&amp;list_uids=26205662">http://www.ncbi.nlm.nih.gov/entrez/query.fcgi?cmd=Retrieve&amp;db=pubmed&amp;dopt=Abstract&amp;list_uids=26205662</a>  6 Cell Commun Signal 13   2015 Journal Article,Research Support, Non-U.S. Gov't                                                                                                                                                                                                                                                                                                                                                                         |
| mmrn1  | src    | <a href="http://www.ncbi.nlm.nih.gov/entrez/query.fcgi?cmd=Retrieve&amp;db=pubmed&amp;dopt=Abstract&amp;list_uids=26205662">http://www.ncbi.nlm.nih.gov/entrez/query.fcgi?cmd=Retrieve&amp;db=pubmed&amp;dopt=Abstract&amp;list_uids=26205662</a>  6 Cell Commun Signal 13   2015 Journal Article,Research Support, Non-U.S. Gov't                                                                                                                                                                                                                                                                                                                                                                         |
| mmrn1  | fyn    | <a href="http://www.ncbi.nlm.nih.gov/entrez/query.fcgi?cmd=Retrieve&amp;db=pubmed&amp;dopt=Abstract&amp;list_uids=26205662">http://www.ncbi.nlm.nih.gov/entrez/query.fcgi?cmd=Retrieve&amp;db=pubmed&amp;dopt=Abstract&amp;list_uids=26205662</a>  6 Cell Commun Signal 13   2015 Journal Article,Research Support, Non-U.S. Gov't                                                                                                                                                                                                                                                                                                                                                                         |
| src    | fyn    | <a href="http://www.ncbi.nlm.nih.gov/entrez/query.fcgi?cmd=Retrieve&amp;db=pubmed&amp;dopt=Abstract&amp;list_uids=23836527">http://www.ncbi.nlm.nih.gov/entrez/query.fcgi?cmd=Retrieve&amp;db=pubmed&amp;dopt=Abstract&amp;list_uids=23836527</a>  6 Stem Cells 31 11 Nov 2013 Journal Article,Research Support, N.I.H., Extramural  <a href="http://www.ncbi.nlm.nih.gov/entrez/query.fcgi?cmd=Retrieve&amp;db=pubmed&amp;dopt=Abstract&amp;list_uids=26205662">http://www.ncbi.nlm.nih.gov/entrez/query.fcgi?cmd=Retrieve&amp;db=pubmed&amp;dopt=Abstract&amp;list_uids=26205662</a>                                                                                                                     |

|        |        |                                                                                                                                                                                                                                                                                                                                                                                                                         |
|--------|--------|-------------------------------------------------------------------------------------------------------------------------------------------------------------------------------------------------------------------------------------------------------------------------------------------------------------------------------------------------------------------------------------------------------------------------|
|        |        | 6 Cell Commun Signal 13  2015 Journal Article,Research Support, Non-U.S. Gov't http://www.ncbi.nlm.nih.gov/entrez/query.fcgi?cmd=Retrieve&db=pubmed&dopt=Abstract&list_uids=25694432 6 J Biol Chem 290 15 Apr 2015 Journal Article,Research Support, Non-U.S. Gov't                                                                                                                                                     |
| elmo1  | actin  | http://www.ncbi.nlm.nih.gov/entrez/query.fcgi?cmd=Retrieve&db=pubmed&dopt=Abstract&list_uids=26205662 6 Cell Commun Signal 13  2015 Journal Article,Research Support, Non-U.S. Gov't                                                                                                                                                                                                                                    |
| sema3c | vegfa  | http://www.ncbi.nlm.nih.gov/entrez/query.fcgi?cmd=Retrieve&db=pubmed&dopt=Abstract&list_uids=26194913 6 EMBO Mol Med 7 10 Oct 2015 Journal Article,Research Support, Non-U.S. Gov't                                                                                                                                                                                                                                     |
| sema3c | akt1   | http://www.ncbi.nlm.nih.gov/entrez/query.fcgi?cmd=Retrieve&db=pubmed&dopt=Abstract&list_uids=26194913 6 EMBO Mol Med 7 10 Oct 2015 Journal Article,Research Support, Non-U.S. Gov't                                                                                                                                                                                                                                     |
| sema3c | ptk2   | http://www.ncbi.nlm.nih.gov/entrez/query.fcgi?cmd=Retrieve&db=pubmed&dopt=Abstract&list_uids=26194913 6 EMBO Mol Med 7 10 Oct 2015 Journal Article,Research Support, Non-U.S. Gov't                                                                                                                                                                                                                                     |
| vegfa  | akt1   | http://www.ncbi.nlm.nih.gov/entrez/query.fcgi?cmd=Retrieve&db=pubmed&dopt=Abstract&list_uids=26194913 6 EMBO Mol Med 7 10 Oct 2015 Journal Article,Research Support, Non-U.S. Gov't                                                                                                                                                                                                                                     |
| vegfa  | ptk2   | http://www.ncbi.nlm.nih.gov/entrez/query.fcgi?cmd=Retrieve&db=pubmed&dopt=Abstract&list_uids=25820249 6 J Cell Physiol 230 11 Nov 2015 Journal Article,Research Support, Non-U.S. Gov't http://www.ncbi.nlm.nih.gov/entrez/query.fcgi?cmd=Retrieve&db=pubmed&dopt=Abstract&list_uids=26194913 6 EMBO Mol Med 7 10 Oct 2015 Journal Article,Research Support, Non-U.S. Gov't                                             |
| cd99   | slc3a2 | http://www.ncbi.nlm.nih.gov/entrez/query.fcgi?cmd=Retrieve&db=pubmed&dopt=Abstract&list_uids=26172215 6 Exp Cell Res 336 2 Aug 2015 Journal Article,Research Support, Non-U.S. Gov't                                                                                                                                                                                                                                    |
| cd99   | ptpn11 | http://www.ncbi.nlm.nih.gov/entrez/query.fcgi?cmd=Retrieve&db=pubmed&dopt=Abstract&list_uids=26172215 6 Exp Cell Res 336 2 Aug 2015 Journal Article,Research Support, Non-U.S. Gov't                                                                                                                                                                                                                                    |
| cd99   | ptk2   | http://www.ncbi.nlm.nih.gov/entrez/query.fcgi?cmd=Retrieve&db=pubmed&dopt=Abstract&list_uids=26172215 6 Exp Cell Res 336 2 Aug 2015 Journal Article,Research Support, Non-U.S. Gov't                                                                                                                                                                                                                                    |
| slc3a2 | ptpn11 | http://www.ncbi.nlm.nih.gov/entrez/query.fcgi?cmd=Retrieve&db=pubmed&dopt=Abstract&list_uids=26172215 6 Exp Cell Res 336 2 Aug 2015 Journal Article,Research Support, Non-U.S. Gov't                                                                                                                                                                                                                                    |
| slc3a2 | ptk2   | http://www.ncbi.nlm.nih.gov/entrez/query.fcgi?cmd=Retrieve&db=pubmed&dopt=Abstract&list_uids=26172215 6 Exp Cell Res 336 2 Aug 2015 Journal Article,Research Support, Non-U.S. Gov't                                                                                                                                                                                                                                    |
| ptpn11 | ptk2   | http://www.ncbi.nlm.nih.gov/entrez/query.fcgi?cmd=Retrieve&db=pubmed&dopt=Abstract&list_uids=23512980 6 Mol Cancer Res 11 6 Jun 2013 Journal Article,Research Support, N.I.H., Extramural,Research Support, U.S. Gov't, Non-P.H.S. http://www.ncbi.nlm.nih.gov/entrez/query.fcgi?cmd=Retrieve&db=pubmed&dopt=Abstract&list_uids=26172215 6 Exp Cell Res 336 2 Aug 2015 Journal Article,Research Support, Non-U.S. Gov't |
| slc3a2 | fas    | http://www.ncbi.nlm.nih.gov/entrez/query.fcgi?cmd=Retrieve&db=pubmed&dopt=Abstract&list_uids=26172215 6 Exp Cell Res 336 2 Aug 2015 Journal Article,Research Support, Non-U.S. Gov't                                                                                                                                                                                                                                    |
| cd99   | src    | http://www.ncbi.nlm.nih.gov/entrez/query.fcgi?cmd=Retrieve&db=pubmed&dopt=Abstract&list_uids=26172215 6 Exp Cell Res 336 2 Aug 2015 Journal Article,Research Support, Non-U.S. Gov't                                                                                                                                                                                                                                    |
| src    | ptpn11 | http://www.ncbi.nlm.nih.gov/entrez/query.fcgi?cmd=Retrieve&db=pubmed&dopt=Abstract&list_uids=26172215 6 Exp Cell                                                                                                                                                                                                                                                                                                        |

|        |       |                                                                                                                                                                                                                                                                                                                                                                                                                                                                                                                                                                                                                                                                                                                                                                                                                                                                                                                                                                                                                                                                                                                                                                                                                                                                                                                                                                                                                                                                                                                                                                                                                                                                                                                                                                                                                                                                                                                                                                                                                                                                                                                                                                                                                                                                                                                                                                                                                                                                                                                                                                                                                                                                                                                                                                                                                                                                                                                                                                                                                                                                                                                                                                                                                                                                                                                                                                                                                                                                                                             |
|--------|-------|-------------------------------------------------------------------------------------------------------------------------------------------------------------------------------------------------------------------------------------------------------------------------------------------------------------------------------------------------------------------------------------------------------------------------------------------------------------------------------------------------------------------------------------------------------------------------------------------------------------------------------------------------------------------------------------------------------------------------------------------------------------------------------------------------------------------------------------------------------------------------------------------------------------------------------------------------------------------------------------------------------------------------------------------------------------------------------------------------------------------------------------------------------------------------------------------------------------------------------------------------------------------------------------------------------------------------------------------------------------------------------------------------------------------------------------------------------------------------------------------------------------------------------------------------------------------------------------------------------------------------------------------------------------------------------------------------------------------------------------------------------------------------------------------------------------------------------------------------------------------------------------------------------------------------------------------------------------------------------------------------------------------------------------------------------------------------------------------------------------------------------------------------------------------------------------------------------------------------------------------------------------------------------------------------------------------------------------------------------------------------------------------------------------------------------------------------------------------------------------------------------------------------------------------------------------------------------------------------------------------------------------------------------------------------------------------------------------------------------------------------------------------------------------------------------------------------------------------------------------------------------------------------------------------------------------------------------------------------------------------------------------------------------------------------------------------------------------------------------------------------------------------------------------------------------------------------------------------------------------------------------------------------------------------------------------------------------------------------------------------------------------------------------------------------------------------------------------------------------------------------------------|
|        |       | Res 336 2 Aug 2015 Journal Article,Research Support, Non-U.S. Gov't                                                                                                                                                                                                                                                                                                                                                                                                                                                                                                                                                                                                                                                                                                                                                                                                                                                                                                                                                                                                                                                                                                                                                                                                                                                                                                                                                                                                                                                                                                                                                                                                                                                                                                                                                                                                                                                                                                                                                                                                                                                                                                                                                                                                                                                                                                                                                                                                                                                                                                                                                                                                                                                                                                                                                                                                                                                                                                                                                                                                                                                                                                                                                                                                                                                                                                                                                                                                                                         |
| pip5k3 | fas   | <a href="http://www.ncbi.nlm.nih.gov/entrez/query.fcgi?cmd=Retrieve&amp;db=pubmed&amp;dopt=Abstract&amp;list_uids=26149501">http://www.ncbi.nlm.nih.gov/entrez/query.fcgi?cmd=Retrieve&amp;db=pubmed&amp;dopt=Abstract&amp;list_uids=26149501</a>  6 Biochim Biophys Acta 1853 10 Pt A Oct 2015 Journal Article,Research Support, Non-U.S. Gov't                                                                                                                                                                                                                                                                                                                                                                                                                                                                                                                                                                                                                                                                                                                                                                                                                                                                                                                                                                                                                                                                                                                                                                                                                                                                                                                                                                                                                                                                                                                                                                                                                                                                                                                                                                                                                                                                                                                                                                                                                                                                                                                                                                                                                                                                                                                                                                                                                                                                                                                                                                                                                                                                                                                                                                                                                                                                                                                                                                                                                                                                                                                                                            |
| akt1   | egf   | <a href="http://www.ncbi.nlm.nih.gov/entrez/query.fcgi?cmd=Retrieve&amp;db=pubmed&amp;dopt=Abstract&amp;list_uids=26149501">http://www.ncbi.nlm.nih.gov/entrez/query.fcgi?cmd=Retrieve&amp;db=pubmed&amp;dopt=Abstract&amp;list_uids=26149501</a>  6 Biochim Biophys Acta 1853 10 Pt A Oct 2015 Journal Article,Research Support, Non-U.S. Gov't                                                                                                                                                                                                                                                                                                                                                                                                                                                                                                                                                                                                                                                                                                                                                                                                                                                                                                                                                                                                                                                                                                                                                                                                                                                                                                                                                                                                                                                                                                                                                                                                                                                                                                                                                                                                                                                                                                                                                                                                                                                                                                                                                                                                                                                                                                                                                                                                                                                                                                                                                                                                                                                                                                                                                                                                                                                                                                                                                                                                                                                                                                                                                            |
| akt1   | fas   | <a href="http://www.ncbi.nlm.nih.gov/entrez/query.fcgi?cmd=Retrieve&amp;db=pubmed&amp;dopt=Abstract&amp;list_uids=26149501">http://www.ncbi.nlm.nih.gov/entrez/query.fcgi?cmd=Retrieve&amp;db=pubmed&amp;dopt=Abstract&amp;list_uids=26149501</a>  6 Biochim Biophys Acta 1853 10 Pt A Oct 2015 Journal Article,Research Support, Non-U.S. Gov't                                                                                                                                                                                                                                                                                                                                                                                                                                                                                                                                                                                                                                                                                                                                                                                                                                                                                                                                                                                                                                                                                                                                                                                                                                                                                                                                                                                                                                                                                                                                                                                                                                                                                                                                                                                                                                                                                                                                                                                                                                                                                                                                                                                                                                                                                                                                                                                                                                                                                                                                                                                                                                                                                                                                                                                                                                                                                                                                                                                                                                                                                                                                                            |
|        |       | <a href="http://www.ncbi.nlm.nih.gov/entrez/query.fcgi?cmd=Retrieve&amp;db=pubmed&amp;dopt=Abstract&amp;list_uids=24635319">http://www.ncbi.nlm.nih.gov/entrez/query.fcgi?cmd=Retrieve&amp;db=pubmed&amp;dopt=Abstract&amp;list_uids=24635319</a>  6 Biochem J 459 3 May 2014 Journal Article,Research Support, Non-U.S. Gov't  <a href="http://www.ncbi.nlm.nih.gov/entrez/query.fcgi?cmd=Retrieve&amp;db=pubmed&amp;dopt=Abstract&amp;list_uids=24550267">http://www.ncbi.nlm.nih.gov/entrez/query.fcgi?cmd=Retrieve&amp;db=pubmed&amp;dopt=Abstract&amp;list_uids=24550267</a>  6 Proc Natl Acad Sci U S A 111 7 Feb 2014 Journal Article,Research Support, N.I.H., Extramural,Research Support, Non-U.S. Gov't,Research Support, U.S. Gov't, Non-P.H.S.  <a href="http://www.ncbi.nlm.nih.gov/entrez/query.fcgi?cmd=Retrieve&amp;db=pubmed&amp;dopt=Abstract&amp;list_uids=23273897">http://www.ncbi.nlm.nih.gov/entrez/query.fcgi?cmd=Retrieve&amp;db=pubmed&amp;dopt=Abstract&amp;list_uids=23273897</a>  6 Curr Biol 23 2 Jan 2013 Journal Article,Research Support, Non-U.S. Gov't  <a href="http://www.ncbi.nlm.nih.gov/entrez/query.fcgi?cmd=Retrieve&amp;db=pubmed&amp;dopt=Abstract&amp;list_uids=26046934">http://www.ncbi.nlm.nih.gov/entrez/query.fcgi?cmd=Retrieve&amp;db=pubmed&amp;dopt=Abstract&amp;list_uids=26046934</a>  6 PLoS One 10 6 2015 Journal Article,Research Support, Non-U.S. Gov't  <a href="http://www.ncbi.nlm.nih.gov/entrez/query.fcgi?cmd=Retrieve&amp;db=pubmed&amp;dopt=Abstract&amp;list_uids=26119091">http://www.ncbi.nlm.nih.gov/entrez/query.fcgi?cmd=Retrieve&amp;db=pubmed&amp;dopt=Abstract&amp;list_uids=26119091</a>  6 Gene 570 1 Oct 2015 Journal Article,Research Support, N.I.H., Extramural,Research Support, Non-U.S. Gov't,Review  <a href="http://www.ncbi.nlm.nih.gov/entrez/query.fcgi?cmd=Retrieve&amp;db=pubmed&amp;dopt=Abstract&amp;list_uids=25359883">http://www.ncbi.nlm.nih.gov/entrez/query.fcgi?cmd=Retrieve&amp;db=pubmed&amp;dopt=Abstract&amp;list_uids=25359883</a>  6 J Cell Sci 127 Pt 24 Dec 2014 Journal Article,Research Support, Non-U.S. Gov't  <a href="http://www.ncbi.nlm.nih.gov/entrez/query.fcgi?cmd=Retrieve&amp;db=pubmed&amp;dopt=Abstract&amp;list_uids=24486488">http://www.ncbi.nlm.nih.gov/entrez/query.fcgi?cmd=Retrieve&amp;db=pubmed&amp;dopt=Abstract&amp;list_uids=24486488</a>  6 Biochem Biophys Res Commun 444 4 Feb 2014 Journal Article,Research Support, N.I.H., Extramural,Research Support, Non-U.S. Gov't  <a href="http://www.ncbi.nlm.nih.gov/entrez/query.fcgi?cmd=Retrieve&amp;db=pubmed&amp;dopt=Abstract&amp;list_uids=26078334">http://www.ncbi.nlm.nih.gov/entrez/query.fcgi?cmd=Retrieve&amp;db=pubmed&amp;dopt=Abstract&amp;list_uids=26078334</a>  6 Oncotarget 6 18 Jun 2015 Journal Article,Research Support, Non-U.S. Gov't  <a href="http://www.ncbi.nlm.nih.gov/entrez/query.fcgi?cmd=Retrieve&amp;db=pubmed&amp;dopt=Abstract&amp;list_uids=24463198">http://www.ncbi.nlm.nih.gov/entrez/query.fcgi?cmd=Retrieve&amp;db=pubmed&amp;dopt=Abstract&amp;list_uids=24463198</a>  6 Chem Biol Interact 211 Mar 2014 Journal Article,Review  <a href="http://www.ncbi.nlm.nih.gov/entrez/query.fcgi?cmd=Retrieve&amp;db=pubmed&amp;dopt=Abstract&amp;list_uids=22542712">http://www.ncbi.nlm.nih.gov/entrez/query.fcgi?cmd=Retrieve&amp;db=pubmed&amp;dopt=Abstract&amp;list_uids=22542712</a>  6 Exp Mol Pathol 93 1 Aug 2012 Journal Article,Research Support, N.I.H., Extramural |
| ptk2   | actin | <a href="http://www.ncbi.nlm.nih.gov/entrez/query.fcgi?cmd=Retrieve&amp;db=pubmed&amp;dopt=Abstract&amp;list_uids=23091071">http://www.ncbi.nlm.nih.gov/entrez/query.fcgi?cmd=Retrieve&amp;db=pubmed&amp;dopt=Abstract&amp;list_uids=23091071</a>  6 J Cell Biol 199 3 Oct 2012 Journal Article,Research Support, Non-U.S. Gov't  <a href="http://www.ncbi.nlm.nih.gov/entrez/query.fcgi?cmd=Retrieve&amp;db=pubmed&amp;dopt=Abstract&amp;list_uids=24587062">http://www.ncbi.nlm.nih.gov/entrez/query.fcgi?cmd=Retrieve&amp;db=pubmed&amp;dopt=Abstract&amp;list_uids=24587062</a>  6 PLoS One 9 2 2014 Journal Article,Research Support, N.I.H., Extramural,Research Support, Non-U.S. Gov't  <a href="http://www.ncbi.nlm.nih.gov/entrez/query.fcgi?cmd=Retrieve&amp;db=pubmed&amp;dopt=Abstract&amp;list_uids=24928898">http://www.ncbi.nlm.nih.gov/entrez/query.fcgi?cmd=Retrieve&amp;db=pubmed&amp;dopt=Abstract&amp;list_uids=24928898</a>  6 J Cell Sci 127 Pt 16 Aug 2014 Journal Article,Research Support, Non-U.S. Gov't  <a href="http://www.ncbi.nlm.nih.gov/entrez/query.fcgi?cmd=Retrieve&amp;db=pubmed&amp;dopt=Abstract&amp;list_uids=26119091">http://www.ncbi.nlm.nih.gov/entrez/query.fcgi?cmd=Retrieve&amp;db=pubmed&amp;dopt=Abstract&amp;list_uids=26119091</a>  6 Ge                                                                                                                                                                                                                                                                                                                                                                                                                                                                                                                                                                                                                                                                                                                                                                                                                                                                                                                                                                                                                                                                                                                                                                                                                                                                                                                                                                                                                                                                                                                                                                                                                                                                                                                                                                                                                                                                                                                                                                                                                                                                                                                                                                                                                |
| src    | actin |                                                                                                                                                                                                                                                                                                                                                                                                                                                                                                                                                                                                                                                                                                                                                                                                                                                                                                                                                                                                                                                                                                                                                                                                                                                                                                                                                                                                                                                                                                                                                                                                                                                                                                                                                                                                                                                                                                                                                                                                                                                                                                                                                                                                                                                                                                                                                                                                                                                                                                                                                                                                                                                                                                                                                                                                                                                                                                                                                                                                                                                                                                                                                                                                                                                                                                                                                                                                                                                                                                             |

|       |         |                                                                                                                                                                                                                                                                                                                                                                                                                                                                                                                                                                                                                                                                                                                                                                                                                                                                                                                                                                                                                                                                                                                                                            |
|-------|---------|------------------------------------------------------------------------------------------------------------------------------------------------------------------------------------------------------------------------------------------------------------------------------------------------------------------------------------------------------------------------------------------------------------------------------------------------------------------------------------------------------------------------------------------------------------------------------------------------------------------------------------------------------------------------------------------------------------------------------------------------------------------------------------------------------------------------------------------------------------------------------------------------------------------------------------------------------------------------------------------------------------------------------------------------------------------------------------------------------------------------------------------------------------|
|       |         | ne 570 1 Oct 2015 Journal Article,Research Support, N.I.H., Extramural,Research Support, Non-U.S. Gov't,Review  <a href="http://www.ncbi.nlm.nih.gov/entrez/query.fcgi?cmd=Retrieve&amp;db=pubmed&amp;dopt=Abstract&amp;list_uids=25359883">http://www.ncbi.nlm.nih.gov/entrez/query.fcgi?cmd=Retrieve&amp;db=pubmed&amp;dopt=Abstract&amp;list_uids=25359883</a>  6 J Cell Sci 127 Pt 24 Dec 2014 Journal Article,Research Support, Non-U.S. Gov't  <a href="http://www.ncbi.nlm.nih.gov/entrez/query.fcgi?cmd=Retrieve&amp;db=pubmed&amp;dopt=Abstract&amp;list_uids=23023326">http://www.ncbi.nlm.nih.gov/entrez/query.fcgi?cmd=Retrieve&amp;db=pubmed&amp;dopt=Abstract&amp;list_uids=23023326</a>  6 Int J Oncol 41 6 Dec 2012 Journal Article,Research Support, Non-U.S. Gov't  <a href="http://www.ncbi.nlm.nih.gov/entrez/query.fcgi?cmd=Retrieve&amp;db=pubmed&amp;dopt=Abstract&amp;list_uids=24036928">http://www.ncbi.nlm.nih.gov/entrez/query.fcgi?cmd=Retrieve&amp;db=pubmed&amp;dopt=Abstract&amp;list_uids=24036928</a>  6 Cell Cycle 12 21 Nov 2013 Journal Article,Research Support, N.I.H., Extramural,Research Support, Non-U.S. Gov't |
| actin | wasf2   | <a href="http://www.ncbi.nlm.nih.gov/entrez/query.fcgi?cmd=Retrieve&amp;db=pubmed&amp;dopt=Abstract&amp;list_uids=26116771">http://www.ncbi.nlm.nih.gov/entrez/query.fcgi?cmd=Retrieve&amp;db=pubmed&amp;dopt=Abstract&amp;list_uids=26116771</a>  6 Biochem Biophys Res Commun 464 1 Aug 2015 Journal Article,Research Support, Non-U.S. Gov't                                                                                                                                                                                                                                                                                                                                                                                                                                                                                                                                                                                                                                                                                                                                                                                                            |
| igf2  | h19     | <a href="http://www.ncbi.nlm.nih.gov/entrez/query.fcgi?cmd=Retrieve&amp;db=pubmed&amp;dopt=Abstract&amp;list_uids=26116569">http://www.ncbi.nlm.nih.gov/entrez/query.fcgi?cmd=Retrieve&amp;db=pubmed&amp;dopt=Abstract&amp;list_uids=26116569</a>  6 J Cell Sci 128 16 Aug 2015 Journal Article,Research Support, Non-U.S. Gov't                                                                                                                                                                                                                                                                                                                                                                                                                                                                                                                                                                                                                                                                                                                                                                                                                           |
| evc2  | sgcb    | <a href="http://www.ncbi.nlm.nih.gov/entrez/query.fcgi?cmd=Retrieve&amp;db=pubmed&amp;dopt=Abstract&amp;list_uids=26114488">http://www.ncbi.nlm.nih.gov/entrez/query.fcgi?cmd=Retrieve&amp;db=pubmed&amp;dopt=Abstract&amp;list_uids=26114488</a>  6 Invest Ophthalmol Vis Sci 56 6 Jun 2015 Journal Article                                                                                                                                                                                                                                                                                                                                                                                                                                                                                                                                                                                                                                                                                                                                                                                                                                               |
| evc2  | myh14   | <a href="http://www.ncbi.nlm.nih.gov/entrez/query.fcgi?cmd=Retrieve&amp;db=pubmed&amp;dopt=Abstract&amp;list_uids=26114488">http://www.ncbi.nlm.nih.gov/entrez/query.fcgi?cmd=Retrieve&amp;db=pubmed&amp;dopt=Abstract&amp;list_uids=26114488</a>  6 Invest Ophthalmol Vis Sci 56 6 Jun 2015 Journal Article                                                                                                                                                                                                                                                                                                                                                                                                                                                                                                                                                                                                                                                                                                                                                                                                                                               |
| evc2  | myl2    | <a href="http://www.ncbi.nlm.nih.gov/entrez/query.fcgi?cmd=Retrieve&amp;db=pubmed&amp;dopt=Abstract&amp;list_uids=26114488">http://www.ncbi.nlm.nih.gov/entrez/query.fcgi?cmd=Retrieve&amp;db=pubmed&amp;dopt=Abstract&amp;list_uids=26114488</a>  6 Invest Ophthalmol Vis Sci 56 6 Jun 2015 Journal Article                                                                                                                                                                                                                                                                                                                                                                                                                                                                                                                                                                                                                                                                                                                                                                                                                                               |
| evc2  | edn1    | <a href="http://www.ncbi.nlm.nih.gov/entrez/query.fcgi?cmd=Retrieve&amp;db=pubmed&amp;dopt=Abstract&amp;list_uids=26114488">http://www.ncbi.nlm.nih.gov/entrez/query.fcgi?cmd=Retrieve&amp;db=pubmed&amp;dopt=Abstract&amp;list_uids=26114488</a>  6 Invest Ophthalmol Vis Sci 56 6 Jun 2015 Journal Article                                                                                                                                                                                                                                                                                                                                                                                                                                                                                                                                                                                                                                                                                                                                                                                                                                               |
| myh14 | myl2    | <a href="http://www.ncbi.nlm.nih.gov/entrez/query.fcgi?cmd=Retrieve&amp;db=pubmed&amp;dopt=Abstract&amp;list_uids=26114488">http://www.ncbi.nlm.nih.gov/entrez/query.fcgi?cmd=Retrieve&amp;db=pubmed&amp;dopt=Abstract&amp;list_uids=26114488</a>  6 Invest Ophthalmol Vis Sci 56 6 Jun 2015 Journal Article  <a href="http://www.ncbi.nlm.nih.gov/entrez/query.fcgi?cmd=Retrieve&amp;db=pubmed&amp;dopt=Abstract&amp;list_uids=24699667">http://www.ncbi.nlm.nih.gov/entrez/query.fcgi?cmd=Retrieve&amp;db=pubmed&amp;dopt=Abstract&amp;list_uids=24699667</a>  6 P LoS One 9 4 2014 Journal Article,Research Support, Non-U.S. Gov't                                                                                                                                                                                                                                                                                                                                                                                                                                                                                                                     |
| myh14 | edn1    | <a href="http://www.ncbi.nlm.nih.gov/entrez/query.fcgi?cmd=Retrieve&amp;db=pubmed&amp;dopt=Abstract&amp;list_uids=26114488">http://www.ncbi.nlm.nih.gov/entrez/query.fcgi?cmd=Retrieve&amp;db=pubmed&amp;dopt=Abstract&amp;list_uids=26114488</a>  6 Invest Ophthalmol Vis Sci 56 6 Jun 2015 Journal Article                                                                                                                                                                                                                                                                                                                                                                                                                                                                                                                                                                                                                                                                                                                                                                                                                                               |
| myl2  | edn1    | <a href="http://www.ncbi.nlm.nih.gov/entrez/query.fcgi?cmd=Retrieve&amp;db=pubmed&amp;dopt=Abstract&amp;list_uids=26114488">http://www.ncbi.nlm.nih.gov/entrez/query.fcgi?cmd=Retrieve&amp;db=pubmed&amp;dopt=Abstract&amp;list_uids=26114488</a>  6 Invest Ophthalmol Vis Sci 56 6 Jun 2015 Journal Article                                                                                                                                                                                                                                                                                                                                                                                                                                                                                                                                                                                                                                                                                                                                                                                                                                               |
| f2    | nr3c2   | <a href="http://www.ncbi.nlm.nih.gov/entrez/query.fcgi?cmd=Retrieve&amp;db=pubmed&amp;dopt=Abstract&amp;list_uids=26085308">http://www.ncbi.nlm.nih.gov/entrez/query.fcgi?cmd=Retrieve&amp;db=pubmed&amp;dopt=Abstract&amp;list_uids=26085308</a>  6 J Cell Biochem 116 11 Nov 2015 Journal Article,Research Support, Non-U.S. Gov't                                                                                                                                                                                                                                                                                                                                                                                                                                                                                                                                                                                                                                                                                                                                                                                                                       |
| egf   | rapgef5 | <a href="http://www.ncbi.nlm.nih.gov/entrez/query.fcgi?cmd=Retrieve&amp;db=pubmed&amp;dopt=Abstract&amp;list_uids=26079101">http://www.ncbi.nlm.nih.gov/entrez/query.fcgi?cmd=Retrieve&amp;db=pubmed&amp;dopt=Abstract&amp;list_uids=26079101</a>  6 Biochim Biophys Acta 1853 10 Pt A Oct 2015 Journal Article,Research Support, Non-U.S. Gov't                                                                                                                                                                                                                                                                                                                                                                                                                                                                                                                                                                                                                                                                                                                                                                                                           |
| egf   | egfr    | <a href="http://www.ncbi.nlm.nih.gov/entrez/query.fcgi?cmd=Retrieve&amp;db=pubmed&amp;dopt=Abstract&amp;list_uids=24335959">http://www.ncbi.nlm.nih.gov/entrez/query.fcgi?cmd=Retrieve&amp;db=pubmed&amp;dopt=Abstract&amp;list_uids=24335959</a>  6 Cancer Res 74 3 Feb 2014 Journal Article,Research Support, Non-U.S. Gov't  <a href="http://www.ncbi.nlm.nih.gov/entrez/query.fcgi?cmd=Retrieve&amp;db=pubmed&amp;dopt=Abstract&amp;list_uids=24505297">http://www.ncbi.nlm.nih.gov/entrez/query.fcgi?cmd=Retrieve&amp;db=pubmed&amp;dopt=Abstract&amp;list_uids=24505297</a>  6 PLoS One 9 2 2014 Journal Article,Research Support, Non-U.S. Gov't  <a href="http://www.ncbi.nlm.nih.gov/entrez/query.fcgi?cmd=Retrieve&amp;db=pubmed&amp;dopt=Abstract&amp;list_uids=24091658">http://www.ncbi.nlm.nih.gov/entrez/query.fcgi?cmd=Retrieve&amp;db=pubmed&amp;dopt=Abstract&amp;list_uids=24091658</a>  6 Cell                                                                                                                                                                                                                                         |

|      |       |                                                                                                                                                                                                                                                                                                                                                                                                                                                                                                                                                                                                                                                                                                                                                                 |
|------|-------|-----------------------------------------------------------------------------------------------------------------------------------------------------------------------------------------------------------------------------------------------------------------------------------------------------------------------------------------------------------------------------------------------------------------------------------------------------------------------------------------------------------------------------------------------------------------------------------------------------------------------------------------------------------------------------------------------------------------------------------------------------------------|
|      |       | 1 Death Dis[4][2013]Journal Article,Research Support, Non-U.S. Gov't http://www.ncbi.nlm.nih.gov/entrez/query.fcgi?cmd=Retrieve&db=pubmed&dopt=Abstract&list_uids=26079101 6 Biochim Biophys Acta 1853 10 Pt A Oct 2015 Journal Article,Research Support, Non-U.S. Gov't                                                                                                                                                                                                                                                                                                                                                                                                                                                                                        |
| src  | egf   | http://www.ncbi.nlm.nih.gov/entrez/query.fcgi?cmd=Retrieve&db=pubmed&dopt=Abstract&list_uids=25530216 6 Cell Signal 27 3 Mar 2015 Journal Article,Research Support, Non-U.S. Gov't http://www.ncbi.nlm.nih.gov/entrez/query.fcgi?cmd=Retrieve&db=pubmed&dopt=Abstract&list_uids=26079101 6 Biochim Biophys Acta 1853 10 Pt A Oct 2015 Journal Article,Research Support, Non-U.S. Gov't http://www.ncbi.nlm.nih.gov/entrez/query.fcgi?cmd=Retrieve&db=pubmed&dopt=Abstract&list_uids=23023326 6 Int J Oncol 41 6 Dec 2012 Journal Article,Research Support, Non-U.S. Gov't http://www.ncbi.nlm.nih.gov/entrez/query.fcgi?cmd=Retrieve&db=pubmed&dopt=Abstract&list_uids=22357970 6 J Cell Sci 125 Pt 2 Jan 2012 Journal Article,Research Support, Non-U.S. Gov't |
| egf  | ptk2  | http://www.ncbi.nlm.nih.gov/entrez/query.fcgi?cmd=Retrieve&db=pubmed&dopt=Abstract&list_uids=23512980 6 Mol Cancer Res 11 6 Jun 2013 Journal Article,Research Support, N.I.H., Extramural,Research Support, U.S. Gov't, Non-P.H.S. http://www.ncbi.nlm.nih.gov/entrez/query.fcgi?cmd=Retrieve&db=pubmed&dopt=Abstract&list_uids=25530216 6 Cell Signal 27 3 Mar 2015 Journal Article,Research Support, Non-U.S. Gov't http://www.ncbi.nlm.nih.gov/entrez/query.fcgi?cmd=Retrieve&db=pubmed&dopt=Abstract&list_uids=26079101 6 Biochim Biophys Acta 1853 10 Pt A Oct 2015 Journal Article,Research Support, Non-U.S. Gov't                                                                                                                                       |
| egf  | rhoa  | http://www.ncbi.nlm.nih.gov/entrez/query.fcgi?cmd=Retrieve&db=pubmed&dopt=Abstract&list_uids=26079101 6 Biochim Biophys Acta 1853 10 Pt A Oct 2015 Journal Article,Research Support, Non-U.S. Gov't                                                                                                                                                                                                                                                                                                                                                                                                                                                                                                                                                             |
| egf  | grlf1 | http://www.ncbi.nlm.nih.gov/entrez/query.fcgi?cmd=Retrieve&db=pubmed&dopt=Abstract&list_uids=26079101 6 Biochim Biophys Acta 1853 10 Pt A Oct 2015 Journal Article,Research Support, Non-U.S. Gov't                                                                                                                                                                                                                                                                                                                                                                                                                                                                                                                                                             |
| rhoa | grlf1 | http://www.ncbi.nlm.nih.gov/entrez/query.fcgi?cmd=Retrieve&db=pubmed&dopt=Abstract&list_uids=24403595 6 J Virol 88 7 Apr 2014 Journal Article,Research Support, Non-U.S. Gov't http://www.ncbi.nlm.nih.gov/entrez/query.fcgi?cmd=Retrieve&db=pubmed&dopt=Abstract&list_uids=23707396 6 Exp Cell Res 319 13 Aug 2013 Journal Article http://www.ncbi.nlm.nih.gov/entrez/query.fcgi?cmd=Retrieve&db=pubmed&dopt=Abstract&list_uids=26079101 6 Biochim Biophys Acta 1853 10 Pt A Oct 2015 Journal Article,Research Support, Non-U.S. Gov't                                                                                                                                                                                                                         |
| ptk2 | ilk   | http://www.ncbi.nlm.nih.gov/entrez/query.fcgi?cmd=Retrieve&db=pubmed&dopt=Abstract&list_uids=26078334 6 Oncotarget 6 18 Jun 2015 Journal Article,Research Support, Non-U.S. Gov't                                                                                                                                                                                                                                                                                                                                                                                                                                                                                                                                                                               |
| ilk  | actin | http://www.ncbi.nlm.nih.gov/entrez/query.fcgi?cmd=Retrieve&db=pubmed&dopt=Abstract&list_uids=25482629 6 Cell Adh Migr 9 3  2015 Journal Article,Research Support, U.S. Gov't, Non-P.H.S. http://www.ncbi.nlm.nih.gov/entrez/query.fcgi?cmd=Retrieve&db=pubmed&dopt=Abstract&list_uids=26078334 6 Oncotarget 6 18 Jun 2015 Journal Article,Research Support, Non-U.S. Gov't                                                                                                                                                                                                                                                                                                                                                                                      |
| fas  | actin | http://www.ncbi.nlm.nih.gov/entrez/query.fcgi?cmd=Retrieve&db=pubmed&dopt=Abstract&list_uids=24501425 6 Mol Biol Cell 25 7 Apr 2014 Journal Article,Research Support, Non-U.S. Gov't http://www.ncbi.nlm.nih.gov/entrez/query.fcgi?cmd=Retrieve&db=pubmed&dopt=Abstract&list_uids=24452377 6 Am                                                                                                                                                                                                                                                                                                                                                                                                                                                                 |

|       |        |                                                                                                                                                                                                                                                                                                                                                                                                                                                                                                                                                                                                                                                                                                                                                                                                                                                                                                                                                                                                                                                                                                                                                                                                                                                                                                                                                                                                                                                                                                                                                                                                                                                                                                                                                                                                                                                                                                                                                                                                                                                                                                                                                                                                                                                                                                                                                                                                                                                                                                                                                                                                                                                      |
|-------|--------|------------------------------------------------------------------------------------------------------------------------------------------------------------------------------------------------------------------------------------------------------------------------------------------------------------------------------------------------------------------------------------------------------------------------------------------------------------------------------------------------------------------------------------------------------------------------------------------------------------------------------------------------------------------------------------------------------------------------------------------------------------------------------------------------------------------------------------------------------------------------------------------------------------------------------------------------------------------------------------------------------------------------------------------------------------------------------------------------------------------------------------------------------------------------------------------------------------------------------------------------------------------------------------------------------------------------------------------------------------------------------------------------------------------------------------------------------------------------------------------------------------------------------------------------------------------------------------------------------------------------------------------------------------------------------------------------------------------------------------------------------------------------------------------------------------------------------------------------------------------------------------------------------------------------------------------------------------------------------------------------------------------------------------------------------------------------------------------------------------------------------------------------------------------------------------------------------------------------------------------------------------------------------------------------------------------------------------------------------------------------------------------------------------------------------------------------------------------------------------------------------------------------------------------------------------------------------------------------------------------------------------------------------|
|       |        | <p>J Physiol Cell Physiol 306 6 Mar 2014 Journal Article,Research Support, Non-U.S. Gov't <a href="http://www.ncbi.nlm.nih.gov/entrez/query.fcgi?cmd=Retrieve&amp;db=pubmed&amp;dopt=Abstract&amp;list_uids=22524451">http://www.ncbi.nlm.nih.gov/entrez/query.fcgi?cmd=Retrieve&amp;db=pubmed&amp;dopt=Abstract&amp;list_uids=22524451</a> 6 Cell Biol Int 36 7 Jul 2012 Journal Article,Research Support, Non-U.S. Gov't <a href="http://www.ncbi.nlm.nih.gov/entrez/query.fcgi?cmd=Retrieve&amp;db=pubmed&amp;dopt=Abstract&amp;list_uids=25488920">http://www.ncbi.nlm.nih.gov/entrez/query.fcgi?cmd=Retrieve&amp;db=pubmed&amp;dopt=Abstract&amp;list_uids=25488920</a> 6 J Cell Biol 207 5 Dec 2014 Journal Article,Research Support, N.I.H., Extramural,Research Support, Non-U.S. Gov't <a href="http://www.ncbi.nlm.nih.gov/entrez/query.fcgi?cmd=Retrieve&amp;db=pubmed&amp;dopt=Abstract&amp;list_uids=26053221">http://www.ncbi.nlm.nih.gov/entrez/query.fcgi?cmd=Retrieve&amp;db=pubmed&amp;dopt=Abstract&amp;list_uids=26053221</a> 6 Nat Cell Biol 17 7 Jul 2015 Journal Article,Research Support, N.I.H., Extramural,Research Support, N.I.H., Intramural,Research Support, Non-U.S. Gov't <a href="http://www.ncbi.nlm.nih.gov/entrez/query.fcgi?cmd=Retrieve&amp;db=pubmed&amp;dopt=Abstract&amp;list_uids=23843624">http://www.ncbi.nlm.nih.gov/entrez/query.fcgi?cmd=Retrieve&amp;db=pubmed&amp;dopt=Abstract&amp;list_uids=23843624</a> 6 J Cell Sci 126 Pt 18 Sep 2013 Journal Article,Research Support, Non-U.S. Gov't <a href="http://www.ncbi.nlm.nih.gov/entrez/query.fcgi?cmd=Retrieve&amp;db=pubmed&amp;dopt=Abstract&amp;list_uids=22496808">http://www.ncbi.nlm.nih.gov/entrez/query.fcgi?cmd=Retrieve&amp;db=pubmed&amp;dopt=Abstract&amp;list_uids=22496808</a> 6 PLoS One 7 4  2012 Journal Article,Research Support, N.I.H., Extramural,Research Support, Non-U.S. Gov't <a href="http://www.ncbi.nlm.nih.gov/entrez/query.fcgi?cmd=Retrieve&amp;db=pubmed&amp;dopt=Abstract&amp;list_uids=25918420">http://www.ncbi.nlm.nih.gov/entrez/query.fcgi?cmd=Retrieve&amp;db=pubmed&amp;dopt=Abstract&amp;list_uids=25918420</a> 6 Proc Natl Acad Sci U S A 112 19 May 2015 Journal Article,Research Support, N.I.H., Intramural <a href="http://www.ncbi.nlm.nih.gov/entrez/query.fcgi?cmd=Retrieve&amp;db=pubmed&amp;dopt=Abstract&amp;list_uids=24486488">http://www.ncbi.nlm.nih.gov/entrez/query.fcgi?cmd=Retrieve&amp;db=pubmed&amp;dopt=Abstract&amp;list_uids=24486488</a> 6 Biochem Biophys Res Commun 444 4 Feb 2014 Journal Article,Research Support, N.I.H., Extramural,Research Support, Non-U.S. Gov't</p> |
| spp1  | actin  | <a href="http://www.ncbi.nlm.nih.gov/entrez/query.fcgi?cmd=Retrieve&amp;db=pubmed&amp;dopt=Abstract&amp;list_uids=26046934">http://www.ncbi.nlm.nih.gov/entrez/query.fcgi?cmd=Retrieve&amp;db=pubmed&amp;dopt=Abstract&amp;list_uids=26046934</a>  6 PLoS One 10 6  2015 Journal Article,Research Support, Non-U.S. Gov't                                                                                                                                                                                                                                                                                                                                                                                                                                                                                                                                                                                                                                                                                                                                                                                                                                                                                                                                                                                                                                                                                                                                                                                                                                                                                                                                                                                                                                                                                                                                                                                                                                                                                                                                                                                                                                                                                                                                                                                                                                                                                                                                                                                                                                                                                                                            |
| spp1  | runx2  | <a href="http://www.ncbi.nlm.nih.gov/entrez/query.fcgi?cmd=Retrieve&amp;db=pubmed&amp;dopt=Abstract&amp;list_uids=26046934">http://www.ncbi.nlm.nih.gov/entrez/query.fcgi?cmd=Retrieve&amp;db=pubmed&amp;dopt=Abstract&amp;list_uids=26046934</a>  6 PLoS One 10 6  2015 Journal Article,Research Support, Non-U.S. Gov't                                                                                                                                                                                                                                                                                                                                                                                                                                                                                                                                                                                                                                                                                                                                                                                                                                                                                                                                                                                                                                                                                                                                                                                                                                                                                                                                                                                                                                                                                                                                                                                                                                                                                                                                                                                                                                                                                                                                                                                                                                                                                                                                                                                                                                                                                                                            |
| actin | runx2  | <a href="http://www.ncbi.nlm.nih.gov/entrez/query.fcgi?cmd=Retrieve&amp;db=pubmed&amp;dopt=Abstract&amp;list_uids=26046934">http://www.ncbi.nlm.nih.gov/entrez/query.fcgi?cmd=Retrieve&amp;db=pubmed&amp;dopt=Abstract&amp;list_uids=26046934</a>  6 PLoS One 10 6  2015 Journal Article,Research Support, Non-U.S. Gov't                                                                                                                                                                                                                                                                                                                                                                                                                                                                                                                                                                                                                                                                                                                                                                                                                                                                                                                                                                                                                                                                                                                                                                                                                                                                                                                                                                                                                                                                                                                                                                                                                                                                                                                                                                                                                                                                                                                                                                                                                                                                                                                                                                                                                                                                                                                            |
| spp1  | ptk2   | <a href="http://www.ncbi.nlm.nih.gov/entrez/query.fcgi?cmd=Retrieve&amp;db=pubmed&amp;dopt=Abstract&amp;list_uids=26046934">http://www.ncbi.nlm.nih.gov/entrez/query.fcgi?cmd=Retrieve&amp;db=pubmed&amp;dopt=Abstract&amp;list_uids=26046934</a>  6 PLoS One 10 6  2015 Journal Article,Research Support, Non-U.S. Gov't                                                                                                                                                                                                                                                                                                                                                                                                                                                                                                                                                                                                                                                                                                                                                                                                                                                                                                                                                                                                                                                                                                                                                                                                                                                                                                                                                                                                                                                                                                                                                                                                                                                                                                                                                                                                                                                                                                                                                                                                                                                                                                                                                                                                                                                                                                                            |
| egf   | mapk3  | <p><a href="http://www.ncbi.nlm.nih.gov/entrez/query.fcgi?cmd=Retrieve&amp;db=pubmed&amp;dopt=Abstract&amp;list_uids=26035355">http://www.ncbi.nlm.nih.gov/entrez/query.fcgi?cmd=Retrieve&amp;db=pubmed&amp;dopt=Abstract&amp;list_uids=26035355</a> 6 Oncotarget 6 25 Aug 2015 Journal Article,Research Support, Non-U.S. Gov't <a href="http://www.ncbi.nlm.nih.gov/entrez/query.fcgi?cmd=Retrieve&amp;db=pubmed&amp;dopt=Abstract&amp;list_uids=24335959">http://www.ncbi.nlm.nih.gov/entrez/query.fcgi?cmd=Retrieve&amp;db=pubmed&amp;dopt=Abstract&amp;list_uids=24335959</a> 6 Cancer Res 74 3 Feb 2014 Journal Article,Research Support, Non-U.S. Gov't</p>                                                                                                                                                                                                                                                                                                                                                                                                                                                                                                                                                                                                                                                                                                                                                                                                                                                                                                                                                                                                                                                                                                                                                                                                                                                                                                                                                                                                                                                                                                                                                                                                                                                                                                                                                                                                                                                                                                                                                                                   |
| hcc   | egf    | <a href="http://www.ncbi.nlm.nih.gov/entrez/query.fcgi?cmd=Retrieve&amp;db=pubmed&amp;dopt=Abstract&amp;list_uids=26035355">http://www.ncbi.nlm.nih.gov/entrez/query.fcgi?cmd=Retrieve&amp;db=pubmed&amp;dopt=Abstract&amp;list_uids=26035355</a>  6 Oncotarget 6 25 Aug 2015 Journal Article,Research Support, Non-U.S. Gov't                                                                                                                                                                                                                                                                                                                                                                                                                                                                                                                                                                                                                                                                                                                                                                                                                                                                                                                                                                                                                                                                                                                                                                                                                                                                                                                                                                                                                                                                                                                                                                                                                                                                                                                                                                                                                                                                                                                                                                                                                                                                                                                                                                                                                                                                                                                       |
| hcc   | map2k1 | <a href="http://www.ncbi.nlm.nih.gov/entrez/query.fcgi?cmd=Retrieve&amp;db=pubmed&amp;dopt=Abstract&amp;list_uids=26035355">http://www.ncbi.nlm.nih.gov/entrez/query.fcgi?cmd=Retrieve&amp;db=pubmed&amp;dopt=Abstract&amp;list_uids=26035355</a>  6 Oncotarget 6 25 Aug 2015 Journal Article,Research Support, Non-U.S. Gov't                                                                                                                                                                                                                                                                                                                                                                                                                                                                                                                                                                                                                                                                                                                                                                                                                                                                                                                                                                                                                                                                                                                                                                                                                                                                                                                                                                                                                                                                                                                                                                                                                                                                                                                                                                                                                                                                                                                                                                                                                                                                                                                                                                                                                                                                                                                       |
| egf   | map2k1 | <a href="http://www.ncbi.nlm.nih.gov/entrez/query.fcgi?cmd=Retrieve&amp;db=pubmed&amp;dopt=Abstract&amp;list_uids=26035355">http://www.ncbi.nlm.nih.gov/entrez/query.fcgi?cmd=Retrieve&amp;db=pubmed&amp;dopt=Abstract&amp;list_uids=26035355</a>  6 Oncotarget 6 25 Aug 2015 Journal Article,Research Support, Non-U.S. Gov't                                                                                                                                                                                                                                                                                                                                                                                                                                                                                                                                                                                                                                                                                                                                                                                                                                                                                                                                                                                                                                                                                                                                                                                                                                                                                                                                                                                                                                                                                                                                                                                                                                                                                                                                                                                                                                                                                                                                                                                                                                                                                                                                                                                                                                                                                                                       |
| yap1  | taz    | <a href="http://www.ncbi.nlm.nih.gov/entrez/query.fcgi?cmd=Retrieve&amp;db=pubmed&amp;dopt=Abstract&amp;list_uids=23969122">http://www.ncbi.nlm.nih.gov/entrez/query.fcgi?cmd=Retrieve&amp;db=pubmed&amp;dopt=Abstract&amp;list_uids=23969122</a>  6 Differenti                                                                                                                                                                                                                                                                                                                                                                                                                                                                                                                                                                                                                                                                                                                                                                                                                                                                                                                                                                                                                                                                                                                                                                                                                                                                                                                                                                                                                                                                                                                                                                                                                                                                                                                                                                                                                                                                                                                                                                                                                                                                                                                                                                                                                                                                                                                                                                                      |

|       |        |                                                                                                                                                                                                                                                                                                                                                                                                                                                                                                                                                                                                                                                                                                                                                                                                                                                                                                                                                                                                                                                                                            |
|-------|--------|--------------------------------------------------------------------------------------------------------------------------------------------------------------------------------------------------------------------------------------------------------------------------------------------------------------------------------------------------------------------------------------------------------------------------------------------------------------------------------------------------------------------------------------------------------------------------------------------------------------------------------------------------------------------------------------------------------------------------------------------------------------------------------------------------------------------------------------------------------------------------------------------------------------------------------------------------------------------------------------------------------------------------------------------------------------------------------------------|
|       |        | ation 86 3 Oct 2013 Journal Article,Review  <a href="http://www.ncbi.nlm.nih.gov/entrez/query.fcgi?cmd=Retrieve&amp;db=pubmed&amp;dopt=Abstract&amp;list_uids=26026844">http://www.ncbi.nlm.nih.gov/entrez/query.fcgi?cmd=Retrieve&amp;db=pubmed&amp;dopt=Abstract&amp;list_uids=26026844</a>  6 Biomaterials 61  Aug 2015 Journal Article,Research Support, Non-U.S. Gov't  <a href="http://www.ncbi.nlm.nih.gov/entrez/query.fcgi?cmd=Retrieve&amp;db=pubmed&amp;dopt=Abstract&amp;list_uids=22215811">http://www.ncbi.nlm.nih.gov/entrez/query.fcgi?cmd=Retrieve&amp;db=pubmed&amp;dopt=Abstract&amp;list_uids=22215811</a>  6 Genes Dev 26 1 Jan 2012 Journal Article,Research Support, N.I.H., Extramural,Research Support, U.S. Gov't, Non-P.H.S.  <a href="http://www.ncbi.nlm.nih.gov/entrez/query.fcgi?cmd=Retrieve&amp;db=pubmed&amp;dopt=Abstract&amp;list_uids=24106267">http://www.ncbi.nlm.nih.gov/entrez/query.fcgi?cmd=Retrieve&amp;db=pubmed&amp;dopt=Abstract&amp;list_uids=24106267</a>  6 J Biol Chem 288 47 Nov 2013 Journal Article,Research Support, Non-U.S. Gov't |
| parp1 | mapk8  | <a href="http://www.ncbi.nlm.nih.gov/entrez/query.fcgi?cmd=Retrieve&amp;db=pubmed&amp;dopt=Abstract&amp;list_uids=26020630">http://www.ncbi.nlm.nih.gov/entrez/query.fcgi?cmd=Retrieve&amp;db=pubmed&amp;dopt=Abstract&amp;list_uids=26020630</a>  6 PLoS Pathog 11 5 May 2015 Journal Article,Research Support, N.I.H., Extramural,Research Support, Non-U.S. Gov't                                                                                                                                                                                                                                                                                                                                                                                                                                                                                                                                                                                                                                                                                                                       |
| parp1 | crk    | <a href="http://www.ncbi.nlm.nih.gov/entrez/query.fcgi?cmd=Retrieve&amp;db=pubmed&amp;dopt=Abstract&amp;list_uids=26020630">http://www.ncbi.nlm.nih.gov/entrez/query.fcgi?cmd=Retrieve&amp;db=pubmed&amp;dopt=Abstract&amp;list_uids=26020630</a>  6 PLoS Pathog 11 5 May 2015 Journal Article,Research Support, N.I.H., Extramural,Research Support, Non-U.S. Gov't                                                                                                                                                                                                                                                                                                                                                                                                                                                                                                                                                                                                                                                                                                                       |
| krit1 | a2bp1  | <a href="http://www.ncbi.nlm.nih.gov/entrez/query.fcgi?cmd=Retrieve&amp;db=pubmed&amp;dopt=Abstract&amp;list_uids=25988664">http://www.ncbi.nlm.nih.gov/entrez/query.fcgi?cmd=Retrieve&amp;db=pubmed&amp;dopt=Abstract&amp;list_uids=25988664</a>  6 Ann N Y Acad Sci 1349  Sep 2015 Journal Article,Research Support, N.I.H., Intramural,Research Support, Non-U.S. Gov't,Review                                                                                                                                                                                                                                                                                                                                                                                                                                                                                                                                                                                                                                                                                                          |
| akt3  | bcl2   | <a href="http://www.ncbi.nlm.nih.gov/entrez/query.fcgi?cmd=Retrieve&amp;db=pubmed&amp;dopt=Abstract&amp;list_uids=25980492">http://www.ncbi.nlm.nih.gov/entrez/query.fcgi?cmd=Retrieve&amp;db=pubmed&amp;dopt=Abstract&amp;list_uids=25980492</a>  6 Oncotarget 6 15 May 2015 Journal Article,Research Support, Non-U.S. Gov't                                                                                                                                                                                                                                                                                                                                                                                                                                                                                                                                                                                                                                                                                                                                                             |
| akt3  | cyr61  | <a href="http://www.ncbi.nlm.nih.gov/entrez/query.fcgi?cmd=Retrieve&amp;db=pubmed&amp;dopt=Abstract&amp;list_uids=25980492">http://www.ncbi.nlm.nih.gov/entrez/query.fcgi?cmd=Retrieve&amp;db=pubmed&amp;dopt=Abstract&amp;list_uids=25980492</a>  6 Oncotarget 6 15 May 2015 Journal Article,Research Support, Non-U.S. Gov't                                                                                                                                                                                                                                                                                                                                                                                                                                                                                                                                                                                                                                                                                                                                                             |
| bcl2  | cyr61  | <a href="http://www.ncbi.nlm.nih.gov/entrez/query.fcgi?cmd=Retrieve&amp;db=pubmed&amp;dopt=Abstract&amp;list_uids=25980492">http://www.ncbi.nlm.nih.gov/entrez/query.fcgi?cmd=Retrieve&amp;db=pubmed&amp;dopt=Abstract&amp;list_uids=25980492</a>  6 Oncotarget 6 15 May 2015 Journal Article,Research Support, Non-U.S. Gov't                                                                                                                                                                                                                                                                                                                                                                                                                                                                                                                                                                                                                                                                                                                                                             |
| src   | bcar1  | <a href="http://www.ncbi.nlm.nih.gov/entrez/query.fcgi?cmd=Retrieve&amp;db=pubmed&amp;dopt=Abstract&amp;list_uids=25976166">http://www.ncbi.nlm.nih.gov/entrez/query.fcgi?cmd=Retrieve&amp;db=pubmed&amp;dopt=Abstract&amp;list_uids=25976166</a>  6 J Cell Biochem 116 12 Dec 2015 Journal Article,Research Support, N.I.H., Extramural  <a href="http://www.ncbi.nlm.nih.gov/entrez/query.fcgi?cmd=Retrieve&amp;db=pubmed&amp;dopt=Abstract&amp;list_uids=24497348">http://www.ncbi.nlm.nih.gov/entrez/query.fcgi?cmd=Retrieve&amp;db=pubmed&amp;dopt=Abstract&amp;list_uids=24497348</a>  6 Cell Biol Int 38 3 Mar 2014 Journal Article,Research Support, Non-U.S. Gov't,Review                                                                                                                                                                                                                                                                                                                                                                                                         |
| bcar1 | cse11  | <a href="http://www.ncbi.nlm.nih.gov/entrez/query.fcgi?cmd=Retrieve&amp;db=pubmed&amp;dopt=Abstract&amp;list_uids=24928898">http://www.ncbi.nlm.nih.gov/entrez/query.fcgi?cmd=Retrieve&amp;db=pubmed&amp;dopt=Abstract&amp;list_uids=24928898</a>  6 J Cell Sci 127 Pt 16 Aug 2014 Journal Article,Research Support, Non-U.S. Gov't  <a href="http://www.ncbi.nlm.nih.gov/entrez/query.fcgi?cmd=Retrieve&amp;db=pubmed&amp;dopt=Abstract&amp;list_uids=23874939">http://www.ncbi.nlm.nih.gov/entrez/query.fcgi?cmd=Retrieve&amp;db=pubmed&amp;dopt=Abstract&amp;list_uids=23874939</a>  6 PLoS One 8 7  2013 Journal Article,Research Support, Non-U.S. Gov't  <a href="http://www.ncbi.nlm.nih.gov/entrez/query.fcgi?cmd=Retrieve&amp;db=pubmed&amp;dopt=Abstract&amp;list_uids=25976166">http://www.ncbi.nlm.nih.gov/entrez/query.fcgi?cmd=Retrieve&amp;db=pubmed&amp;dopt=Abstract&amp;list_uids=25976166</a>  6 J Cell Biochem 116 12 Dec 2015 Journal Article,Research Support, N.I.H., Extramural                                                                                    |
| cse11 | src    | <a href="http://www.ncbi.nlm.nih.gov/entrez/query.fcgi?cmd=Retrieve&amp;db=pubmed&amp;dopt=Abstract&amp;list_uids=22287273">http://www.ncbi.nlm.nih.gov/entrez/query.fcgi?cmd=Retrieve&amp;db=pubmed&amp;dopt=Abstract&amp;list_uids=22287273</a>  6 J Cell Physiol 227 11 Nov 2012 Journal Article,Research Support, N.I.H., Extramural  <a href="http://www.ncbi.nlm.nih.gov/entrez/query.fcgi?cmd=Retrieve&amp;db=pubmed&amp;dopt=Abstract&amp;list_uids=24928898">http://www.ncbi.nlm.nih.gov/entrez/query.fcgi?cmd=Retrieve&amp;db=pubmed&amp;dopt=Abstract&amp;list_uids=24928898</a>  6 J Cell Sci 127 Pt 16 Aug 2014 Journal Article,Research Support, Non-U.S. Gov't  <a href="http://www.ncbi.nlm.nih.gov/entrez/query.fcgi?cmd=Retrieve&amp;db=pubmed&amp;dopt=Abstract&amp;list_uids=25976166">http://www.ncbi.nlm.nih.gov/entrez/query.fcgi?cmd=Retrieve&amp;db=pubmed&amp;dopt=Abstract&amp;list_uids=25976166</a>  6 J Cell Biochem 116 12 Dec 2015 Journal Article,Research Support, N.I.H., Extramural                                                                    |
| cav1  | lgals3 | <a href="http://www.ncbi.nlm.nih.gov/entrez/query.fcgi?cmd=Retrieve&amp;db=pubmed&amp;dopt=Abstract&amp;list_uids=22513979">http://www.ncbi.nlm.nih.gov/entrez/query.fcgi?cmd=Retrieve&amp;db=pubmed&amp;dopt=Abstract&amp;list_uids=22513979</a>  6 J                                                                                                                                                                                                                                                                                                                                                                                                                                                                                                                                                                                                                                                                                                                                                                                                                                     |

|        |       |                                                                                                                                                                                                                                                                                                                                                                                                                                                                                                                                                                                                                                                                                                                                                                                                                                                                                                                                                                                                                                                                                                                                                                                                                                                                                                                                                                                                                                                                                                                                                                                                                                                                                                                                                                                                                                                                                                                                                                                                                                                                                                                                                                                                    |
|--------|-------|----------------------------------------------------------------------------------------------------------------------------------------------------------------------------------------------------------------------------------------------------------------------------------------------------------------------------------------------------------------------------------------------------------------------------------------------------------------------------------------------------------------------------------------------------------------------------------------------------------------------------------------------------------------------------------------------------------------------------------------------------------------------------------------------------------------------------------------------------------------------------------------------------------------------------------------------------------------------------------------------------------------------------------------------------------------------------------------------------------------------------------------------------------------------------------------------------------------------------------------------------------------------------------------------------------------------------------------------------------------------------------------------------------------------------------------------------------------------------------------------------------------------------------------------------------------------------------------------------------------------------------------------------------------------------------------------------------------------------------------------------------------------------------------------------------------------------------------------------------------------------------------------------------------------------------------------------------------------------------------------------------------------------------------------------------------------------------------------------------------------------------------------------------------------------------------------------|
|        |       | Pathol 228 1 Sep 2012 Journal Article,Research Support, Non-U.S. Gov't  <a href="http://www.ncbi.nlm.nih.gov/entrez/query.fcgi?cmd=Retrieve&amp;db=pubmed&amp;dopt=Abstract&amp;list_uids=25942420">http://www.ncbi.nlm.nih.gov/entrez/query.fcgi?cmd=Retrieve&amp;db=pubmed&amp;dopt=Abstract&amp;list_uids=25942420</a>  6 PLoS One 10 5  2015 Journal Article,Research Support, Non-U.S. Gov't                                                                                                                                                                                                                                                                                                                                                                                                                                                                                                                                                                                                                                                                                                                                                                                                                                                                                                                                                                                                                                                                                                                                                                                                                                                                                                                                                                                                                                                                                                                                                                                                                                                                                                                                                                                                  |
| cav1   | ptk2  | <a href="http://www.ncbi.nlm.nih.gov/entrez/query.fcgi?cmd=Retrieve&amp;db=pubmed&amp;dopt=Abstract&amp;list_uids=22513979">http://www.ncbi.nlm.nih.gov/entrez/query.fcgi?cmd=Retrieve&amp;db=pubmed&amp;dopt=Abstract&amp;list_uids=22513979</a>  6 J Pathol 228 1 Sep 2012 Journal Article,Research Support, Non-U.S. Gov't  <a href="http://www.ncbi.nlm.nih.gov/entrez/query.fcgi?cmd=Retrieve&amp;db=pubmed&amp;dopt=Abstract&amp;list_uids=25942420">http://www.ncbi.nlm.nih.gov/entrez/query.fcgi?cmd=Retrieve&amp;db=pubmed&amp;dopt=Abstract&amp;list_uids=25942420</a>  6 PLoS One 10 5  2015 Journal Article,Research Support, Non-U.S. Gov't                                                                                                                                                                                                                                                                                                                                                                                                                                                                                                                                                                                                                                                                                                                                                                                                                                                                                                                                                                                                                                                                                                                                                                                                                                                                                                                                                                                                                                                                                                                                           |
| cav1   | fas   | <a href="http://www.ncbi.nlm.nih.gov/entrez/query.fcgi?cmd=Retrieve&amp;db=pubmed&amp;dopt=Abstract&amp;list_uids=25942420">http://www.ncbi.nlm.nih.gov/entrez/query.fcgi?cmd=Retrieve&amp;db=pubmed&amp;dopt=Abstract&amp;list_uids=25942420</a>  6 PLoS One 10 5  2015 Journal Article,Research Support, Non-U.S. Gov't                                                                                                                                                                                                                                                                                                                                                                                                                                                                                                                                                                                                                                                                                                                                                                                                                                                                                                                                                                                                                                                                                                                                                                                                                                                                                                                                                                                                                                                                                                                                                                                                                                                                                                                                                                                                                                                                          |
| lgals3 | ptk2  | <a href="http://www.ncbi.nlm.nih.gov/entrez/query.fcgi?cmd=Retrieve&amp;db=pubmed&amp;dopt=Abstract&amp;list_uids=22513979">http://www.ncbi.nlm.nih.gov/entrez/query.fcgi?cmd=Retrieve&amp;db=pubmed&amp;dopt=Abstract&amp;list_uids=22513979</a>  6 J Pathol 228 1 Sep 2012 Journal Article,Research Support, Non-U.S. Gov't  <a href="http://www.ncbi.nlm.nih.gov/entrez/query.fcgi?cmd=Retrieve&amp;db=pubmed&amp;dopt=Abstract&amp;list_uids=25942420">http://www.ncbi.nlm.nih.gov/entrez/query.fcgi?cmd=Retrieve&amp;db=pubmed&amp;dopt=Abstract&amp;list_uids=25942420</a>  6 PLoS One 10 5  2015 Journal Article,Research Support, Non-U.S. Gov't                                                                                                                                                                                                                                                                                                                                                                                                                                                                                                                                                                                                                                                                                                                                                                                                                                                                                                                                                                                                                                                                                                                                                                                                                                                                                                                                                                                                                                                                                                                                           |
| lgals3 | fas   | <a href="http://www.ncbi.nlm.nih.gov/entrez/query.fcgi?cmd=Retrieve&amp;db=pubmed&amp;dopt=Abstract&amp;list_uids=25942420">http://www.ncbi.nlm.nih.gov/entrez/query.fcgi?cmd=Retrieve&amp;db=pubmed&amp;dopt=Abstract&amp;list_uids=25942420</a>  6 PLoS One 10 5  2015 Journal Article,Research Support, Non-U.S. Gov't                                                                                                                                                                                                                                                                                                                                                                                                                                                                                                                                                                                                                                                                                                                                                                                                                                                                                                                                                                                                                                                                                                                                                                                                                                                                                                                                                                                                                                                                                                                                                                                                                                                                                                                                                                                                                                                                          |
| inf2   | actin | <a href="http://www.ncbi.nlm.nih.gov/entrez/query.fcgi?cmd=Retrieve&amp;db=pubmed&amp;dopt=Abstract&amp;list_uids=25918420">http://www.ncbi.nlm.nih.gov/entrez/query.fcgi?cmd=Retrieve&amp;db=pubmed&amp;dopt=Abstract&amp;list_uids=25918420</a>  6 Proc Natl Acad Sci U S A 112 19 May 2015 Journal Article,Research Support, N.I.H., Intramural                                                                                                                                                                                                                                                                                                                                                                                                                                                                                                                                                                                                                                                                                                                                                                                                                                                                                                                                                                                                                                                                                                                                                                                                                                                                                                                                                                                                                                                                                                                                                                                                                                                                                                                                                                                                                                                 |
| inf2   | fas   | <a href="http://www.ncbi.nlm.nih.gov/entrez/query.fcgi?cmd=Retrieve&amp;db=pubmed&amp;dopt=Abstract&amp;list_uids=25918420">http://www.ncbi.nlm.nih.gov/entrez/query.fcgi?cmd=Retrieve&amp;db=pubmed&amp;dopt=Abstract&amp;list_uids=25918420</a>  6 Proc Natl Acad Sci U S A 112 19 May 2015 Journal Article,Research Support, N.I.H., Intramural                                                                                                                                                                                                                                                                                                                                                                                                                                                                                                                                                                                                                                                                                                                                                                                                                                                                                                                                                                                                                                                                                                                                                                                                                                                                                                                                                                                                                                                                                                                                                                                                                                                                                                                                                                                                                                                 |
| fas    | mmrn1 | <a href="http://www.ncbi.nlm.nih.gov/entrez/query.fcgi?cmd=Retrieve&amp;db=pubmed&amp;dopt=Abstract&amp;list_uids=25544611">http://www.ncbi.nlm.nih.gov/entrez/query.fcgi?cmd=Retrieve&amp;db=pubmed&amp;dopt=Abstract&amp;list_uids=25544611</a>  6 Curr Biol 25 2 Jan 2015 Journal Article,Research Support, N.I.H., Extramural,Research Support, N.I.H., Intramural  <a href="http://www.ncbi.nlm.nih.gov/entrez/query.fcgi?cmd=Retrieve&amp;db=pubmed&amp;dopt=Abstract&amp;list_uids=25081612">http://www.ncbi.nlm.nih.gov/entrez/query.fcgi?cmd=Retrieve&amp;db=pubmed&amp;dopt=Abstract&amp;list_uids=25081612</a>  6 Prog Mol Biol Transl Sci 126  2014 Journal Article,Research Support, Non-U.S. Gov't,Review  <a href="http://www.ncbi.nlm.nih.gov/entrez/query.fcgi?cmd=Retrieve&amp;db=pubmed&amp;dopt=Abstract&amp;list_uids=23830911">http://www.ncbi.nlm.nih.gov/entrez/query.fcgi?cmd=Retrieve&amp;db=pubmed&amp;dopt=Abstract&amp;list_uids=23830911</a>  6 Curr Opin Cell Biol 25 5 Oct 2013 Journal Article,Research Support, N.I.H., Intramural,Review  <a href="http://www.ncbi.nlm.nih.gov/entrez/query.fcgi?cmd=Retrieve&amp;db=pubmed&amp;dopt=Abstract&amp;list_uids=23754369">http://www.ncbi.nlm.nih.gov/entrez/query.fcgi?cmd=Retrieve&amp;db=pubmed&amp;dopt=Abstract&amp;list_uids=23754369</a>  6 Proc Natl Acad Sci U S A 110 26 Jun 2013 Journal Article,Research Support, N.I.H., Intramural,Research Support, Non-U.S. Gov't  <a href="http://www.ncbi.nlm.nih.gov/entrez/query.fcgi?cmd=Retrieve&amp;db=pubmed&amp;dopt=Abstract&amp;list_uids=25918420">http://www.ncbi.nlm.nih.gov/entrez/query.fcgi?cmd=Retrieve&amp;db=pubmed&amp;dopt=Abstract&amp;list_uids=25918420</a>  6 Proc Natl Acad Sci U S A 112 19 May 2015 Journal Article,Research Support, N.I.H., Intramural  <a href="http://www.ncbi.nlm.nih.gov/entrez/query.fcgi?cmd=Retrieve&amp;db=pubmed&amp;dopt=Abstract&amp;list_uids=22908306">http://www.ncbi.nlm.nih.gov/entrez/query.fcgi?cmd=Retrieve&amp;db=pubmed&amp;dopt=Abstract&amp;list_uids=22908306</a>  6 J Cell Biol 198 4 Aug 2012 Journal Article,Research Support, N.I.H., Extramural,Research Support, Non-U.S. Gov't,Review |
| synpo2 | actin | <a href="http://www.ncbi.nlm.nih.gov/entrez/query.fcgi?cmd=Retrieve&amp;db=pubmed&amp;dopt=Abstract&amp;list_uids=25883213">http://www.ncbi.nlm.nih.gov/entrez/query.fcgi?cmd=Retrieve&amp;db=pubmed&amp;dopt=Abstract&amp;list_uids=25883213</a>  6 Oncotarget 6 13 May 2015 Journal Article,Research Support, Non-U.S. Gov't                                                                                                                                                                                                                                                                                                                                                                                                                                                                                                                                                                                                                                                                                                                                                                                                                                                                                                                                                                                                                                                                                                                                                                                                                                                                                                                                                                                                                                                                                                                                                                                                                                                                                                                                                                                                                                                                     |
| synpo2 | pcsk1 | <a href="http://www.ncbi.nlm.nih.gov/entrez/query.fcgi?cmd=Retrieve&amp;db=pubmed&amp;dopt=Abstract&amp;list_uids=25883213">http://www.ncbi.nlm.nih.gov/entrez/query.fcgi?cmd=Retrieve&amp;db=pubmed&amp;dopt=Abstract&amp;list_uids=25883213</a>  6 Oncotarget 6 13 May 2015 Journal Article,Research Support, Non-U.S. Gov't                                                                                                                                                                                                                                                                                                                                                                                                                                                                                                                                                                                                                                                                                                                                                                                                                                                                                                                                                                                                                                                                                                                                                                                                                                                                                                                                                                                                                                                                                                                                                                                                                                                                                                                                                                                                                                                                     |



|        |        |                                                                                                                                                                                                                                                                                                                                                                                                                                                                                                                                                                                                                                                                                      |
|--------|--------|--------------------------------------------------------------------------------------------------------------------------------------------------------------------------------------------------------------------------------------------------------------------------------------------------------------------------------------------------------------------------------------------------------------------------------------------------------------------------------------------------------------------------------------------------------------------------------------------------------------------------------------------------------------------------------------|
| actin  | pcsk1  | <a href="http://www.ncbi.nlm.nih.gov/entrez/query.fcgi?cmd=Retrieve&amp;db=pubmed&amp;dopt=Abstract&amp;list_uids=25883213">http://www.ncbi.nlm.nih.gov/entrez/query.fcgi?cmd=Retrieve&amp;db=pubmed&amp;dopt=Abstract&amp;list_uids=25883213</a>  6 Oncotarget 6 13 May 2015 Journal Article,Research Support, Non-U.S. Gov't                                                                                                                                                                                                                                                                                                                                                       |
| myh14  | synpo2 | <a href="http://www.ncbi.nlm.nih.gov/entrez/query.fcgi?cmd=Retrieve&amp;db=pubmed&amp;dopt=Abstract&amp;list_uids=25883213">http://www.ncbi.nlm.nih.gov/entrez/query.fcgi?cmd=Retrieve&amp;db=pubmed&amp;dopt=Abstract&amp;list_uids=25883213</a>  6 Oncotarget 6 13 May 2015 Journal Article,Research Support, Non-U.S. Gov't                                                                                                                                                                                                                                                                                                                                                       |
| ddr1   | atm    | <a href="http://www.ncbi.nlm.nih.gov/entrez/query.fcgi?cmd=Retrieve&amp;db=pubmed&amp;dopt=Abstract&amp;list_uids=25874996">http://www.ncbi.nlm.nih.gov/entrez/query.fcgi?cmd=Retrieve&amp;db=pubmed&amp;dopt=Abstract&amp;list_uids=25874996</a>  6 PLoS One 10 4  2015 Journal Article,Research Support, Non-U.S. Gov't                                                                                                                                                                                                                                                                                                                                                            |
| atm    | actin  | <a href="http://www.ncbi.nlm.nih.gov/entrez/query.fcgi?cmd=Retrieve&amp;db=pubmed&amp;dopt=Abstract&amp;list_uids=25874996">http://www.ncbi.nlm.nih.gov/entrez/query.fcgi?cmd=Retrieve&amp;db=pubmed&amp;dopt=Abstract&amp;list_uids=25874996</a>  6 PLoS One 10 4  2015 Journal Article,Research Support, Non-U.S. Gov't                                                                                                                                                                                                                                                                                                                                                            |
| atm    | net1   | <a href="http://www.ncbi.nlm.nih.gov/entrez/query.fcgi?cmd=Retrieve&amp;db=pubmed&amp;dopt=Abstract&amp;list_uids=25874996">http://www.ncbi.nlm.nih.gov/entrez/query.fcgi?cmd=Retrieve&amp;db=pubmed&amp;dopt=Abstract&amp;list_uids=25874996</a>  6 PLoS One 10 4  2015 Journal Article,Research Support, Non-U.S. Gov't                                                                                                                                                                                                                                                                                                                                                            |
| actin  | net1   | <a href="http://www.ncbi.nlm.nih.gov/entrez/query.fcgi?cmd=Retrieve&amp;db=pubmed&amp;dopt=Abstract&amp;list_uids=25874996">http://www.ncbi.nlm.nih.gov/entrez/query.fcgi?cmd=Retrieve&amp;db=pubmed&amp;dopt=Abstract&amp;list_uids=25874996</a>  6 PLoS One 10 4  2015 Journal Article,Research Support, Non-U.S. Gov't                                                                                                                                                                                                                                                                                                                                                            |
| pdc6ip | tsg101 | <a href="http://www.ncbi.nlm.nih.gov/entrez/query.fcgi?cmd=Retrieve&amp;db=pubmed&amp;dopt=Abstract&amp;list_uids=25874996">http://www.ncbi.nlm.nih.gov/entrez/query.fcgi?cmd=Retrieve&amp;db=pubmed&amp;dopt=Abstract&amp;list_uids=25874996</a>  6 PLoS One 10 4  2015 Journal Article,Research Support, Non-U.S. Gov't                                                                                                                                                                                                                                                                                                                                                            |
| fer    | src    | <a href="http://www.ncbi.nlm.nih.gov/entrez/query.fcgi?cmd=Retrieve&amp;db=pubmed&amp;dopt=Abstract&amp;list_uids=25867068">http://www.ncbi.nlm.nih.gov/entrez/query.fcgi?cmd=Retrieve&amp;db=pubmed&amp;dopt=Abstract&amp;list_uids=25867068</a>  6 Oncogene 35 4 Jan 2016 Journal Article,Research Support, Non-U.S. Gov't                                                                                                                                                                                                                                                                                                                                                         |
| anxa1  | mapk3  | <a href="http://www.ncbi.nlm.nih.gov/entrez/query.fcgi?cmd=Retrieve&amp;db=pubmed&amp;dopt=Abstract&amp;list_uids=25866182">http://www.ncbi.nlm.nih.gov/entrez/query.fcgi?cmd=Retrieve&amp;db=pubmed&amp;dopt=Abstract&amp;list_uids=25866182</a>  6 Biochem Biophys Res Commun 461 1 May 2015 Journal Article,Research Support, Non-U.S. Gov't                                                                                                                                                                                                                                                                                                                                      |
| anxa1  | rhoa   | <a href="http://www.ncbi.nlm.nih.gov/entrez/query.fcgi?cmd=Retrieve&amp;db=pubmed&amp;dopt=Abstract&amp;list_uids=25866182">http://www.ncbi.nlm.nih.gov/entrez/query.fcgi?cmd=Retrieve&amp;db=pubmed&amp;dopt=Abstract&amp;list_uids=25866182</a>  6 Biochem Biophys Res Commun 461 1 May 2015 Journal Article,Research Support, Non-U.S. Gov't                                                                                                                                                                                                                                                                                                                                      |
| anxa1  | ephb2  | <a href="http://www.ncbi.nlm.nih.gov/entrez/query.fcgi?cmd=Retrieve&amp;db=pubmed&amp;dopt=Abstract&amp;list_uids=25866182">http://www.ncbi.nlm.nih.gov/entrez/query.fcgi?cmd=Retrieve&amp;db=pubmed&amp;dopt=Abstract&amp;list_uids=25866182</a>  6 Biochem Biophys Res Commun 461 1 May 2015 Journal Article,Research Support, Non-U.S. Gov't                                                                                                                                                                                                                                                                                                                                      |
| rhoa   | ephb2  | <a href="http://www.ncbi.nlm.nih.gov/entrez/query.fcgi?cmd=Retrieve&amp;db=pubmed&amp;dopt=Abstract&amp;list_uids=25866182">http://www.ncbi.nlm.nih.gov/entrez/query.fcgi?cmd=Retrieve&amp;db=pubmed&amp;dopt=Abstract&amp;list_uids=25866182</a>  6 Biochem Biophys Res Commun 461 1 May 2015 Journal Article,Research Support, Non-U.S. Gov't                                                                                                                                                                                                                                                                                                                                      |
| rhoa   | cxcl12 | <a href="http://www.ncbi.nlm.nih.gov/entrez/query.fcgi?cmd=Retrieve&amp;db=pubmed&amp;dopt=Abstract&amp;list_uids=25866182">http://www.ncbi.nlm.nih.gov/entrez/query.fcgi?cmd=Retrieve&amp;db=pubmed&amp;dopt=Abstract&amp;list_uids=25866182</a>  6 Biochem Biophys Res Commun 461 1 May 2015 Journal Article,Research Support, Non-U.S. Gov't                                                                                                                                                                                                                                                                                                                                      |
| rhoa   | map3k1 | <a href="http://www.ncbi.nlm.nih.gov/entrez/query.fcgi?cmd=Retrieve&amp;db=pubmed&amp;dopt=Abstract&amp;list_uids=25866182">http://www.ncbi.nlm.nih.gov/entrez/query.fcgi?cmd=Retrieve&amp;db=pubmed&amp;dopt=Abstract&amp;list_uids=25866182</a>  6 Biochem Biophys Res Commun 461 1 May 2015 Journal Article,Research Support, Non-U.S. Gov't                                                                                                                                                                                                                                                                                                                                      |
| cxcl12 | map3k1 | <a href="http://www.ncbi.nlm.nih.gov/entrez/query.fcgi?cmd=Retrieve&amp;db=pubmed&amp;dopt=Abstract&amp;list_uids=25866182">http://www.ncbi.nlm.nih.gov/entrez/query.fcgi?cmd=Retrieve&amp;db=pubmed&amp;dopt=Abstract&amp;list_uids=25866182</a>  6 Biochem Biophys Res Commun 461 1 May 2015 Journal Article,Research Support, Non-U.S. Gov't                                                                                                                                                                                                                                                                                                                                      |
| mapk3  | rhoa   | <a href="http://www.ncbi.nlm.nih.gov/entrez/query.fcgi?cmd=Retrieve&amp;db=pubmed&amp;dopt=Abstract&amp;list_uids=22946047">http://www.ncbi.nlm.nih.gov/entrez/query.fcgi?cmd=Retrieve&amp;db=pubmed&amp;dopt=Abstract&amp;list_uids=22946047</a>  6 J Cell Sci 125 Pt 22 Nov 2012 Journal Article,Research Support, Non-U.S. Gov't  <a href="http://www.ncbi.nlm.nih.gov/entrez/query.fcgi?cmd=Retrieve&amp;db=pubmed&amp;dopt=Abstract&amp;list_uids=25866182">http://www.ncbi.nlm.nih.gov/entrez/query.fcgi?cmd=Retrieve&amp;db=pubmed&amp;dopt=Abstract&amp;list_uids=25866182</a>  6 Biochem Biophys Res Commun 461 1 May 2015 Journal Article,Research Support, Non-U.S. Gov't |
| tys    | s1pr1  | <a href="http://www.ncbi.nlm.nih.gov/entrez/query.fcgi?cmd=Retrieve&amp;db=pubmed&amp;dopt=Abstract&amp;list_uids=25862132">http://www.ncbi.nlm.nih.gov/entrez/query.fcgi?cmd=Retrieve&amp;db=pubmed&amp;dopt=Abstract&amp;list_uids=25862132</a>  6 Microvasc Res 99  May 2015 Journal Article,Research Support, N.I.H., Extramural                                                                                                                                                                                                                                                                                                                                                 |

|       |        |                                                                                                                                                                                                                                                                                                                                                                                                                                                                                                                                                                                                                                                                                                                     |
|-------|--------|---------------------------------------------------------------------------------------------------------------------------------------------------------------------------------------------------------------------------------------------------------------------------------------------------------------------------------------------------------------------------------------------------------------------------------------------------------------------------------------------------------------------------------------------------------------------------------------------------------------------------------------------------------------------------------------------------------------------|
| tys   | mbtps1 | <a href="http://www.ncbi.nlm.nih.gov/entrez/query.fcgi?cmd=Retrieve&amp;db=pubmed&amp;dopt=Abstract&amp;list_uids=25862132">http://www.ncbi.nlm.nih.gov/entrez/query.fcgi?cmd=Retrieve&amp;db=pubmed&amp;dopt=Abstract&amp;list_uids=25862132</a> [6]Microvas<br>c Res[99][May 2015 Journal Article,Research Support, N.I.H., Extramural                                                                                                                                                                                                                                                                                                                                                                            |
| s1pr1 | mbtps1 | <a href="http://www.ncbi.nlm.nih.gov/entrez/query.fcgi?cmd=Retrieve&amp;db=pubmed&amp;dopt=Abstract&amp;list_uids=25862132">http://www.ncbi.nlm.nih.gov/entrez/query.fcgi?cmd=Retrieve&amp;db=pubmed&amp;dopt=Abstract&amp;list_uids=25862132</a> [6]Microvas<br>c Res[99][May 2015 Journal Article,Research Support, N.I.H., Extramural                                                                                                                                                                                                                                                                                                                                                                            |
| tys   | tjp1   | <a href="http://www.ncbi.nlm.nih.gov/entrez/query.fcgi?cmd=Retrieve&amp;db=pubmed&amp;dopt=Abstract&amp;list_uids=25862132">http://www.ncbi.nlm.nih.gov/entrez/query.fcgi?cmd=Retrieve&amp;db=pubmed&amp;dopt=Abstract&amp;list_uids=25862132</a> [6]Microvas<br>c Res[99][May 2015 Journal Article,Research Support, N.I.H., Extramural                                                                                                                                                                                                                                                                                                                                                                            |
| tys   | gpsn2  | <a href="http://www.ncbi.nlm.nih.gov/entrez/query.fcgi?cmd=Retrieve&amp;db=pubmed&amp;dopt=Abstract&amp;list_uids=25862132">http://www.ncbi.nlm.nih.gov/entrez/query.fcgi?cmd=Retrieve&amp;db=pubmed&amp;dopt=Abstract&amp;list_uids=25862132</a> [6]Microvas<br>c Res[99][May 2015 Journal Article,Research Support, N.I.H., Extramural                                                                                                                                                                                                                                                                                                                                                                            |
| gpsn2 | tjp1   | <a href="http://www.ncbi.nlm.nih.gov/entrez/query.fcgi?cmd=Retrieve&amp;db=pubmed&amp;dopt=Abstract&amp;list_uids=25862132">http://www.ncbi.nlm.nih.gov/entrez/query.fcgi?cmd=Retrieve&amp;db=pubmed&amp;dopt=Abstract&amp;list_uids=25862132</a> [6]Microvas<br>c Res[99][May 2015 Journal Article,Research Support, N.I.H., Extramural                                                                                                                                                                                                                                                                                                                                                                            |
| tys   | ptk2   | <a href="http://www.ncbi.nlm.nih.gov/entrez/query.fcgi?cmd=Retrieve&amp;db=pubmed&amp;dopt=Abstract&amp;list_uids=25862132">http://www.ncbi.nlm.nih.gov/entrez/query.fcgi?cmd=Retrieve&amp;db=pubmed&amp;dopt=Abstract&amp;list_uids=25862132</a> [6]Microvas<br>c Res[99][May 2015 Journal Article,Research Support, N.I.H., Extramural                                                                                                                                                                                                                                                                                                                                                                            |
| ptk2  | gpsn2  | <a href="http://www.ncbi.nlm.nih.gov/entrez/query.fcgi?cmd=Retrieve&amp;db=pubmed&amp;dopt=Abstract&amp;list_uids=25862132">http://www.ncbi.nlm.nih.gov/entrez/query.fcgi?cmd=Retrieve&amp;db=pubmed&amp;dopt=Abstract&amp;list_uids=25862132</a> [6]Microvas<br>c Res[99][May 2015 Journal Article,Research Support, N.I.H., Extramural                                                                                                                                                                                                                                                                                                                                                                            |
| tys   | actin  | <a href="http://www.ncbi.nlm.nih.gov/entrez/query.fcgi?cmd=Retrieve&amp;db=pubmed&amp;dopt=Abstract&amp;list_uids=25862132">http://www.ncbi.nlm.nih.gov/entrez/query.fcgi?cmd=Retrieve&amp;db=pubmed&amp;dopt=Abstract&amp;list_uids=25862132</a> [6]Microvas<br>c Res[99][May 2015 Journal Article,Research Support, N.I.H., Extramural                                                                                                                                                                                                                                                                                                                                                                            |
| actin | gpsn2  | <a href="http://www.ncbi.nlm.nih.gov/entrez/query.fcgi?cmd=Retrieve&amp;db=pubmed&amp;dopt=Abstract&amp;list_uids=25862132">http://www.ncbi.nlm.nih.gov/entrez/query.fcgi?cmd=Retrieve&amp;db=pubmed&amp;dopt=Abstract&amp;list_uids=25862132</a> [6]Microvas<br>c Res[99][May 2015 Journal Article,Research Support, N.I.H., Extramural                                                                                                                                                                                                                                                                                                                                                                            |
| tys   | akt1   | <a href="http://www.ncbi.nlm.nih.gov/entrez/query.fcgi?cmd=Retrieve&amp;db=pubmed&amp;dopt=Abstract&amp;list_uids=25862132">http://www.ncbi.nlm.nih.gov/entrez/query.fcgi?cmd=Retrieve&amp;db=pubmed&amp;dopt=Abstract&amp;list_uids=25862132</a> [6]Microvas<br>c Res[99][May 2015 Journal Article,Research Support, N.I.H., Extramural                                                                                                                                                                                                                                                                                                                                                                            |
| tys   | pi3    | <a href="http://www.ncbi.nlm.nih.gov/entrez/query.fcgi?cmd=Retrieve&amp;db=pubmed&amp;dopt=Abstract&amp;list_uids=25862132">http://www.ncbi.nlm.nih.gov/entrez/query.fcgi?cmd=Retrieve&amp;db=pubmed&amp;dopt=Abstract&amp;list_uids=25862132</a> [6]Microvas<br>c Res[99][May 2015 Journal Article,Research Support, N.I.H., Extramural                                                                                                                                                                                                                                                                                                                                                                            |
| akt1  | pi3    | <a href="http://www.ncbi.nlm.nih.gov/entrez/query.fcgi?cmd=Retrieve&amp;db=pubmed&amp;dopt=Abstract&amp;list_uids=25862132">http://www.ncbi.nlm.nih.gov/entrez/query.fcgi?cmd=Retrieve&amp;db=pubmed&amp;dopt=Abstract&amp;list_uids=25862132</a> [6]Microvas<br>c Res[99][May 2015 Journal Article,Research Support, N.I.H., Extramural] <a href="http://www.ncbi.nlm.nih.gov/entrez/query.fcgi?cmd=Retrieve&amp;db=pubmed&amp;dopt=Abstract&amp;list_uids=25000176">http://www.ncbi.nlm.nih.gov/entrez/query.fcgi?cmd=Retrieve&amp;db=pubmed&amp;dopt=Abstract&amp;list_uids=25000176</a><br>[6]PLoS One[9][7][2014 Journal Article,Research Support, N.I.H., Extramural,Research Support, U.S. Gov't, Non-P.H.S. |
| akt1  | gpsn2  | <a href="http://www.ncbi.nlm.nih.gov/entrez/query.fcgi?cmd=Retrieve&amp;db=pubmed&amp;dopt=Abstract&amp;list_uids=25862132">http://www.ncbi.nlm.nih.gov/entrez/query.fcgi?cmd=Retrieve&amp;db=pubmed&amp;dopt=Abstract&amp;list_uids=25862132</a> [6]Microvas<br>c Res[99][May 2015 Journal Article,Research Support, N.I.H., Extramural                                                                                                                                                                                                                                                                                                                                                                            |
| pi3   | gpsn2  | <a href="http://www.ncbi.nlm.nih.gov/entrez/query.fcgi?cmd=Retrieve&amp;db=pubmed&amp;dopt=Abstract&amp;list_uids=25862132">http://www.ncbi.nlm.nih.gov/entrez/query.fcgi?cmd=Retrieve&amp;db=pubmed&amp;dopt=Abstract&amp;list_uids=25862132</a> [6]Microvas<br>c Res[99][May 2015 Journal Article,Research Support, N.I.H., Extramural                                                                                                                                                                                                                                                                                                                                                                            |
| tys   | rac1   | <a href="http://www.ncbi.nlm.nih.gov/entrez/query.fcgi?cmd=Retrieve&amp;db=pubmed&amp;dopt=Abstract&amp;list_uids=25862132">http://www.ncbi.nlm.nih.gov/entrez/query.fcgi?cmd=Retrieve&amp;db=pubmed&amp;dopt=Abstract&amp;list_uids=25862132</a> [6]Microvas<br>c Res[99][May 2015 Journal Article,Research Support, N.I.H., Extramural                                                                                                                                                                                                                                                                                                                                                                            |
| rac1  | gpsn2  | <a href="http://www.ncbi.nlm.nih.gov/entrez/query.fcgi?cmd=Retrieve&amp;db=pubmed&amp;dopt=Abstract&amp;list_uids=25862132">http://www.ncbi.nlm.nih.gov/entrez/query.fcgi?cmd=Retrieve&amp;db=pubmed&amp;dopt=Abstract&amp;list_uids=25862132</a> [6]Microvas<br>c Res[99][May 2015 Journal Article,Research Support, N.I.H., Extramural                                                                                                                                                                                                                                                                                                                                                                            |
| actn1 | zyx    | <a href="http://www.ncbi.nlm.nih.gov/entrez/query.fcgi?cmd=Retrieve&amp;db=pubmed&amp;dopt=Abstract&amp;list_uids=25860875">http://www.ncbi.nlm.nih.gov/entrez/query.fcgi?cmd=Retrieve&amp;db=pubmed&amp;dopt=Abstract&amp;list_uids=25860875</a> [6]PLoS<br>One[10][4][2015 Journal Article                                                                                                                                                                                                                                                                                                                                                                                                                        |

|         |          |                                                                                                                                                                                                                                                                                                                                                                                                                                                                                                                                                                                                                                                                    |
|---------|----------|--------------------------------------------------------------------------------------------------------------------------------------------------------------------------------------------------------------------------------------------------------------------------------------------------------------------------------------------------------------------------------------------------------------------------------------------------------------------------------------------------------------------------------------------------------------------------------------------------------------------------------------------------------------------|
| actn1   | actn4    | <a href="http://www.ncbi.nlm.nih.gov/entrez/query.fcgi?cmd=Retrieve&amp;db=pubmed&amp;dopt=Abstract&amp;list_uids=25860875">http://www.ncbi.nlm.nih.gov/entrez/query.fcgi?cmd=Retrieve&amp;db=pubmed&amp;dopt=Abstract&amp;list_uids=25860875</a>  6 PLoS One 10 4  2015 Journal Article                                                                                                                                                                                                                                                                                                                                                                           |
| zyx     | actn4    | <a href="http://www.ncbi.nlm.nih.gov/entrez/query.fcgi?cmd=Retrieve&amp;db=pubmed&amp;dopt=Abstract&amp;list_uids=25860875">http://www.ncbi.nlm.nih.gov/entrez/query.fcgi?cmd=Retrieve&amp;db=pubmed&amp;dopt=Abstract&amp;list_uids=25860875</a>  6 PLoS One 10 4  2015 Journal Article                                                                                                                                                                                                                                                                                                                                                                           |
| vegfa   | fas      | <a href="http://www.ncbi.nlm.nih.gov/entrez/query.fcgi?cmd=Retrieve&amp;db=pubmed&amp;dopt=Abstract&amp;list_uids=25820249">http://www.ncbi.nlm.nih.gov/entrez/query.fcgi?cmd=Retrieve&amp;db=pubmed&amp;dopt=Abstract&amp;list_uids=25820249</a>  6 J Cell Physiol 230 11 Nov 2015 Journal Article,Research Support, Non-U.S. Gov't                                                                                                                                                                                                                                                                                                                               |
| rac1    | vegfa    | <a href="http://www.ncbi.nlm.nih.gov/entrez/query.fcgi?cmd=Retrieve&amp;db=pubmed&amp;dopt=Abstract&amp;list_uids=25820249">http://www.ncbi.nlm.nih.gov/entrez/query.fcgi?cmd=Retrieve&amp;db=pubmed&amp;dopt=Abstract&amp;list_uids=25820249</a>  6 J Cell Physiol 230 11 Nov 2015 Journal Article,Research Support, Non-U.S. Gov't  <a href="http://www.ncbi.nlm.nih.gov/entrez/query.fcgi?cmd=Retrieve&amp;db=pubmed&amp;dopt=Abstract&amp;list_uids=24903274">http://www.ncbi.nlm.nih.gov/entrez/query.fcgi?cmd=Retrieve&amp;db=pubmed&amp;dopt=Abstract&amp;list_uids=24903274</a>  6 FA SEB J 28 9 Sep 2014 Journal Article,Research Support, Non-U.S. Gov't |
| tgfb1l1 | nox4     | <a href="http://www.ncbi.nlm.nih.gov/entrez/query.fcgi?cmd=Retrieve&amp;db=pubmed&amp;dopt=Abstract&amp;list_uids=25814672">http://www.ncbi.nlm.nih.gov/entrez/query.fcgi?cmd=Retrieve&amp;db=pubmed&amp;dopt=Abstract&amp;list_uids=25814672</a>  6 Arterioscler Thromb Vasc Biol 35 5 May 2015 Journal Article,Research Support, N.I.H., Extramural,Research Support, Non-U.S. Gov't                                                                                                                                                                                                                                                                             |
| mdfc    | hsp90b2p | <a href="http://www.ncbi.nlm.nih.gov/entrez/query.fcgi?cmd=Retrieve&amp;db=pubmed&amp;dopt=Abstract&amp;list_uids=25814672">http://www.ncbi.nlm.nih.gov/entrez/query.fcgi?cmd=Retrieve&amp;db=pubmed&amp;dopt=Abstract&amp;list_uids=25814672</a>  6 Arterioscler Thromb Vasc Biol 35 5 May 2015 Journal Article,Research Support, N.I.H., Extramural,Research Support, Non-U.S. Gov't                                                                                                                                                                                                                                                                             |
| tgfb1l1 | hspb1    | <a href="http://www.ncbi.nlm.nih.gov/entrez/query.fcgi?cmd=Retrieve&amp;db=pubmed&amp;dopt=Abstract&amp;list_uids=25814672">http://www.ncbi.nlm.nih.gov/entrez/query.fcgi?cmd=Retrieve&amp;db=pubmed&amp;dopt=Abstract&amp;list_uids=25814672</a>  6 Arterioscler Thromb Vasc Biol 35 5 May 2015 Journal Article,Research Support, N.I.H., Extramural,Research Support, Non-U.S. Gov't                                                                                                                                                                                                                                                                             |
| tgfb1l1 | fas      | <a href="http://www.ncbi.nlm.nih.gov/entrez/query.fcgi?cmd=Retrieve&amp;db=pubmed&amp;dopt=Abstract&amp;list_uids=25814672">http://www.ncbi.nlm.nih.gov/entrez/query.fcgi?cmd=Retrieve&amp;db=pubmed&amp;dopt=Abstract&amp;list_uids=25814672</a>  6 Arterioscler Thromb Vasc Biol 35 5 May 2015 Journal Article,Research Support, N.I.H., Extramural,Research Support, Non-U.S. Gov't                                                                                                                                                                                                                                                                             |
| hspb1   | nox4     | <a href="http://www.ncbi.nlm.nih.gov/entrez/query.fcgi?cmd=Retrieve&amp;db=pubmed&amp;dopt=Abstract&amp;list_uids=25814672">http://www.ncbi.nlm.nih.gov/entrez/query.fcgi?cmd=Retrieve&amp;db=pubmed&amp;dopt=Abstract&amp;list_uids=25814672</a>  6 Arterioscler Thromb Vasc Biol 35 5 May 2015 Journal Article,Research Support, N.I.H., Extramural,Research Support, Non-U.S. Gov't                                                                                                                                                                                                                                                                             |
| hspb1   | fas      | <a href="http://www.ncbi.nlm.nih.gov/entrez/query.fcgi?cmd=Retrieve&amp;db=pubmed&amp;dopt=Abstract&amp;list_uids=25814672">http://www.ncbi.nlm.nih.gov/entrez/query.fcgi?cmd=Retrieve&amp;db=pubmed&amp;dopt=Abstract&amp;list_uids=25814672</a>  6 Arterioscler Thromb Vasc Biol 35 5 May 2015 Journal Article,Research Support, N.I.H., Extramural,Research Support, Non-U.S. Gov't                                                                                                                                                                                                                                                                             |
| nox4    | fas      | <a href="http://www.ncbi.nlm.nih.gov/entrez/query.fcgi?cmd=Retrieve&amp;db=pubmed&amp;dopt=Abstract&amp;list_uids=25814672">http://www.ncbi.nlm.nih.gov/entrez/query.fcgi?cmd=Retrieve&amp;db=pubmed&amp;dopt=Abstract&amp;list_uids=25814672</a>  6 Arterioscler Thromb Vasc Biol 35 5 May 2015 Journal Article,Research Support, N.I.H., Extramural,Research Support, Non-U.S. Gov't                                                                                                                                                                                                                                                                             |
| itgb3bp | map3k8   | <a href="http://www.ncbi.nlm.nih.gov/entrez/query.fcgi?cmd=Retrieve&amp;db=pubmed&amp;dopt=Abstract&amp;list_uids=25774502">http://www.ncbi.nlm.nih.gov/entrez/query.fcgi?cmd=Retrieve&amp;db=pubmed&amp;dopt=Abstract&amp;list_uids=25774502</a>  6 J Clin Invest 125 4 Apr 2015 Journal Article,Research Support, Non-U.S. Gov't,Video-Audio Media                                                                                                                                                                                                                                                                                                               |
| itgb3bp | nek2     | <a href="http://www.ncbi.nlm.nih.gov/entrez/query.fcgi?cmd=Retrieve&amp;db=pubmed&amp;dopt=Abstract&amp;list_uids=25774502">http://www.ncbi.nlm.nih.gov/entrez/query.fcgi?cmd=Retrieve&amp;db=pubmed&amp;dopt=Abstract&amp;list_uids=25774502</a>  6 J Clin Invest 125 4 Apr 2015 Journal Article,Research Support, Non-U.S. Gov't,Video-Audio Media                                                                                                                                                                                                                                                                                                               |
| itgb3bp | shc1     | <a href="http://www.ncbi.nlm.nih.gov/entrez/query.fcgi?cmd=Retrieve&amp;db=pubmed&amp;dopt=Abstract&amp;list_uids=25774502">http://www.ncbi.nlm.nih.gov/entrez/query.fcgi?cmd=Retrieve&amp;db=pubmed&amp;dopt=Abstract&amp;list_uids=25774502</a>  6 J Clin                                                                                                                                                                                                                                                                                                                                                                                                        |

|        |        |                                                                                                                                                                                                                                                                                                                                                                                                                                                                                                                                                                                                                                                                         |
|--------|--------|-------------------------------------------------------------------------------------------------------------------------------------------------------------------------------------------------------------------------------------------------------------------------------------------------------------------------------------------------------------------------------------------------------------------------------------------------------------------------------------------------------------------------------------------------------------------------------------------------------------------------------------------------------------------------|
|        |        | Invest 125 4 Apr 2015 Journal Article,Research Support, Non-U.S. Gov't,Video-Audio Media                                                                                                                                                                                                                                                                                                                                                                                                                                                                                                                                                                                |
| map3k8 | nek2   | <a href="http://www.ncbi.nlm.nih.gov/entrez/query.fcgi?cmd=Retrieve&amp;db=pubmed&amp;dopt=Abstract&amp;list_uids=25774502">http://www.ncbi.nlm.nih.gov/entrez/query.fcgi?cmd=Retrieve&amp;db=pubmed&amp;dopt=Abstract&amp;list_uids=25774502</a>  6 J Clin Invest 125 4 Apr 2015 Journal Article,Research Support, Non-U.S. Gov't,Video-Audio Media                                                                                                                                                                                                                                                                                                                    |
| map3k8 | shc1   | <a href="http://www.ncbi.nlm.nih.gov/entrez/query.fcgi?cmd=Retrieve&amp;db=pubmed&amp;dopt=Abstract&amp;list_uids=25774502">http://www.ncbi.nlm.nih.gov/entrez/query.fcgi?cmd=Retrieve&amp;db=pubmed&amp;dopt=Abstract&amp;list_uids=25774502</a>  6 J Clin Invest 125 4 Apr 2015 Journal Article,Research Support, Non-U.S. Gov't,Video-Audio Media                                                                                                                                                                                                                                                                                                                    |
| nek2   | shc1   | <a href="http://www.ncbi.nlm.nih.gov/entrez/query.fcgi?cmd=Retrieve&amp;db=pubmed&amp;dopt=Abstract&amp;list_uids=25774502">http://www.ncbi.nlm.nih.gov/entrez/query.fcgi?cmd=Retrieve&amp;db=pubmed&amp;dopt=Abstract&amp;list_uids=25774502</a>  6 J Clin Invest 125 4 Apr 2015 Journal Article,Research Support, Non-U.S. Gov't,Video-Audio Media                                                                                                                                                                                                                                                                                                                    |
| src    | ctgf   | <a href="http://www.ncbi.nlm.nih.gov/entrez/query.fcgi?cmd=Retrieve&amp;db=pubmed&amp;dopt=Abstract&amp;list_uids=25766369">http://www.ncbi.nlm.nih.gov/entrez/query.fcgi?cmd=Retrieve&amp;db=pubmed&amp;dopt=Abstract&amp;list_uids=25766369</a>  6 J Cell Mol Med 19 6 Jun 2015 Journal Article,Research Support, Non-U.S. Gov't                                                                                                                                                                                                                                                                                                                                      |
| ptk2   | ctgf   | <a href="http://www.ncbi.nlm.nih.gov/entrez/query.fcgi?cmd=Retrieve&amp;db=pubmed&amp;dopt=Abstract&amp;list_uids=23280549">http://www.ncbi.nlm.nih.gov/entrez/query.fcgi?cmd=Retrieve&amp;db=pubmed&amp;dopt=Abstract&amp;list_uids=23280549</a>  6 J Cell Biochem 114 6 Jun 2013 Journal Article,Research Support, Non-U.S. Gov't  <a href="http://www.ncbi.nlm.nih.gov/entrez/query.fcgi?cmd=Retrieve&amp;db=pubmed&amp;dopt=Abstract&amp;list_uids=25766369">http://www.ncbi.nlm.nih.gov/entrez/query.fcgi?cmd=Retrieve&amp;db=pubmed&amp;dopt=Abstract&amp;list_uids=25766369</a>  6 J Cell Mol Med 19 6 Jun 2015 Journal Article,Research Support, Non-U.S. Gov't |
| ptk2   | sfrs2  | <a href="http://www.ncbi.nlm.nih.gov/entrez/query.fcgi?cmd=Retrieve&amp;db=pubmed&amp;dopt=Abstract&amp;list_uids=25765854">http://www.ncbi.nlm.nih.gov/entrez/query.fcgi?cmd=Retrieve&amp;db=pubmed&amp;dopt=Abstract&amp;list_uids=25765854</a>  6 Integr Biol (Camb) 7 4 Apr 2015 Journal Article,Research Support, N.I.H., Extramural,Research Support, Non-U.S. Gov't                                                                                                                                                                                                                                                                                              |
| hrc    | satb1  | <a href="http://www.ncbi.nlm.nih.gov/entrez/query.fcgi?cmd=Retrieve&amp;db=pubmed&amp;dopt=Abstract&amp;list_uids=25762622">http://www.ncbi.nlm.nih.gov/entrez/query.fcgi?cmd=Retrieve&amp;db=pubmed&amp;dopt=Abstract&amp;list_uids=25762622</a>  6 Oncotarget 6 9 Mar 2015 Journal Article,Research Support, Non-U.S. Gov't                                                                                                                                                                                                                                                                                                                                           |
| hrc    | ptk2   | <a href="http://www.ncbi.nlm.nih.gov/entrez/query.fcgi?cmd=Retrieve&amp;db=pubmed&amp;dopt=Abstract&amp;list_uids=25762622">http://www.ncbi.nlm.nih.gov/entrez/query.fcgi?cmd=Retrieve&amp;db=pubmed&amp;dopt=Abstract&amp;list_uids=25762622</a>  6 Oncotarget 6 9 Mar 2015 Journal Article,Research Support, Non-U.S. Gov't                                                                                                                                                                                                                                                                                                                                           |
| hrc    | atp2a2 | <a href="http://www.ncbi.nlm.nih.gov/entrez/query.fcgi?cmd=Retrieve&amp;db=pubmed&amp;dopt=Abstract&amp;list_uids=25762622">http://www.ncbi.nlm.nih.gov/entrez/query.fcgi?cmd=Retrieve&amp;db=pubmed&amp;dopt=Abstract&amp;list_uids=25762622</a>  6 Oncotarget 6 9 Mar 2015 Journal Article,Research Support, Non-U.S. Gov't                                                                                                                                                                                                                                                                                                                                           |
| hrc    | hcc    | <a href="http://www.ncbi.nlm.nih.gov/entrez/query.fcgi?cmd=Retrieve&amp;db=pubmed&amp;dopt=Abstract&amp;list_uids=25762622">http://www.ncbi.nlm.nih.gov/entrez/query.fcgi?cmd=Retrieve&amp;db=pubmed&amp;dopt=Abstract&amp;list_uids=25762622</a>  6 Oncotarget 6 9 Mar 2015 Journal Article,Research Support, Non-U.S. Gov't                                                                                                                                                                                                                                                                                                                                           |
| hcc    | satb1  | <a href="http://www.ncbi.nlm.nih.gov/entrez/query.fcgi?cmd=Retrieve&amp;db=pubmed&amp;dopt=Abstract&amp;list_uids=25762622">http://www.ncbi.nlm.nih.gov/entrez/query.fcgi?cmd=Retrieve&amp;db=pubmed&amp;dopt=Abstract&amp;list_uids=25762622</a>  6 Oncotarget 6 9 Mar 2015 Journal Article,Research Support, Non-U.S. Gov't                                                                                                                                                                                                                                                                                                                                           |
| satb1  | fos    | <a href="http://www.ncbi.nlm.nih.gov/entrez/query.fcgi?cmd=Retrieve&amp;db=pubmed&amp;dopt=Abstract&amp;list_uids=25762622">http://www.ncbi.nlm.nih.gov/entrez/query.fcgi?cmd=Retrieve&amp;db=pubmed&amp;dopt=Abstract&amp;list_uids=25762622</a>  6 Oncotarget 6 9 Mar 2015 Journal Article,Research Support, Non-U.S. Gov't                                                                                                                                                                                                                                                                                                                                           |
| satb1  | mapk8  | <a href="http://www.ncbi.nlm.nih.gov/entrez/query.fcgi?cmd=Retrieve&amp;db=pubmed&amp;dopt=Abstract&amp;list_uids=25762622">http://www.ncbi.nlm.nih.gov/entrez/query.fcgi?cmd=Retrieve&amp;db=pubmed&amp;dopt=Abstract&amp;list_uids=25762622</a>  6 Oncotarget 6 9 Mar 2015 Journal Article,Research Support, Non-U.S. Gov't                                                                                                                                                                                                                                                                                                                                           |
| hrc    | fos    | <a href="http://www.ncbi.nlm.nih.gov/entrez/query.fcgi?cmd=Retrieve&amp;db=pubmed&amp;dopt=Abstract&amp;list_uids=25762622">http://www.ncbi.nlm.nih.gov/entrez/query.fcgi?cmd=Retrieve&amp;db=pubmed&amp;dopt=Abstract&amp;list_uids=25762622</a>  6 Oncotarget 6 9 Mar 2015 Journal Article,Research Support, Non-U.S. Gov't                                                                                                                                                                                                                                                                                                                                           |
| hrc    | mapk8  | <a href="http://www.ncbi.nlm.nih.gov/entrez/query.fcgi?cmd=Retrieve&amp;db=pubmed&amp;dopt=Abstract&amp;list_uids=25762622">http://www.ncbi.nlm.nih.gov/entrez/query.fcgi?cmd=Retrieve&amp;db=pubmed&amp;dopt=Abstract&amp;list_uids=25762622</a>  6 Oncotarget 6 9 Mar 2015 Journal Article,Research Support, Non-U.S. Gov't                                                                                                                                                                                                                                                                                                                                           |
| fos    | mapk8  | <a href="http://www.ncbi.nlm.nih.gov/entrez/query.fcgi?cmd=Retrieve&amp;db=pubmed&amp;dopt=Abstract&amp;list_uids=23399841">http://www.ncbi.nlm.nih.gov/entrez/query.fcgi?cmd=Retrieve&amp;db=pubmed&amp;dopt=Abstract&amp;list_uids=23399841</a>  6 Cell Immunol 280 2 Dec 2012 Journal Article,Research Support, N.I.H., Extramural,Research Support, Non-U.S. Gov't  <a href="http://www.ncbi.nlm.nih.gov/entrez/query.fcgi?cmd=Retrieve&amp;db=pubmed&amp;dopt=Abstract&amp;list_uids=25762622">http://www.ncbi.nlm.nih.gov/entrez/query.fcgi?cmd=Retrieve&amp;db=pubmed&amp;dopt=Abstract&amp;list_uids=25762622</a>  6 On                                         |

|        |         |                                                                                                                                                                                                                                                                                                                                                                                                                                                                                                                                                                                                                                                                    |
|--------|---------|--------------------------------------------------------------------------------------------------------------------------------------------------------------------------------------------------------------------------------------------------------------------------------------------------------------------------------------------------------------------------------------------------------------------------------------------------------------------------------------------------------------------------------------------------------------------------------------------------------------------------------------------------------------------|
|        |         | cotarget 6 9 Mar 2015 Journal Article,Research Support, Non-U.S. Gov't                                                                                                                                                                                                                                                                                                                                                                                                                                                                                                                                                                                             |
| gnb211 | igf1    | <a href="http://www.ncbi.nlm.nih.gov/entrez/query.fcgi?cmd=Retrieve&amp;db=pubmed&amp;dopt=Abstract&amp;list_uids=25694432">http://www.ncbi.nlm.nih.gov/entrez/query.fcgi?cmd=Retrieve&amp;db=pubmed&amp;dopt=Abstract&amp;list_uids=25694432</a>  6 J Biol Chem 290 15 Apr 2015 Journal Article,Research Support, Non-U.S. Gov't                                                                                                                                                                                                                                                                                                                                  |
| gnb211 | abl1    | <a href="http://www.ncbi.nlm.nih.gov/entrez/query.fcgi?cmd=Retrieve&amp;db=pubmed&amp;dopt=Abstract&amp;list_uids=25694432">http://www.ncbi.nlm.nih.gov/entrez/query.fcgi?cmd=Retrieve&amp;db=pubmed&amp;dopt=Abstract&amp;list_uids=25694432</a>  6 J Biol Chem 290 15 Apr 2015 Journal Article,Research Support, Non-U.S. Gov't                                                                                                                                                                                                                                                                                                                                  |
| igf1   | abl1    | <a href="http://www.ncbi.nlm.nih.gov/entrez/query.fcgi?cmd=Retrieve&amp;db=pubmed&amp;dopt=Abstract&amp;list_uids=25694432">http://www.ncbi.nlm.nih.gov/entrez/query.fcgi?cmd=Retrieve&amp;db=pubmed&amp;dopt=Abstract&amp;list_uids=25694432</a>  6 J Biol Chem 290 15 Apr 2015 Journal Article,Research Support, Non-U.S. Gov't                                                                                                                                                                                                                                                                                                                                  |
| igf1   | src     | <a href="http://www.ncbi.nlm.nih.gov/entrez/query.fcgi?cmd=Retrieve&amp;db=pubmed&amp;dopt=Abstract&amp;list_uids=23023326">http://www.ncbi.nlm.nih.gov/entrez/query.fcgi?cmd=Retrieve&amp;db=pubmed&amp;dopt=Abstract&amp;list_uids=23023326</a>  6 Int J Oncol 41 6 Dec 2012 Journal Article,Research Support, Non-U.S. Gov't  <a href="http://www.ncbi.nlm.nih.gov/entrez/query.fcgi?cmd=Retrieve&amp;db=pubmed&amp;dopt=Abstract&amp;list_uids=25694432">http://www.ncbi.nlm.nih.gov/entrez/query.fcgi?cmd=Retrieve&amp;db=pubmed&amp;dopt=Abstract&amp;list_uids=25694432</a>  6 J Biol Chem 290 15 Apr 2015 Journal Article,Research Support, Non-U.S. Gov't |
| src    | abl1    | <a href="http://www.ncbi.nlm.nih.gov/entrez/query.fcgi?cmd=Retrieve&amp;db=pubmed&amp;dopt=Abstract&amp;list_uids=25694432">http://www.ncbi.nlm.nih.gov/entrez/query.fcgi?cmd=Retrieve&amp;db=pubmed&amp;dopt=Abstract&amp;list_uids=25694432</a>  6 J Biol Chem 290 15 Apr 2015 Journal Article,Research Support, Non-U.S. Gov't                                                                                                                                                                                                                                                                                                                                  |
| fyn    | igf1    | <a href="http://www.ncbi.nlm.nih.gov/entrez/query.fcgi?cmd=Retrieve&amp;db=pubmed&amp;dopt=Abstract&amp;list_uids=25694432">http://www.ncbi.nlm.nih.gov/entrez/query.fcgi?cmd=Retrieve&amp;db=pubmed&amp;dopt=Abstract&amp;list_uids=25694432</a>  6 J Biol Chem 290 15 Apr 2015 Journal Article,Research Support, Non-U.S. Gov't                                                                                                                                                                                                                                                                                                                                  |
| fyn    | abl1    | <a href="http://www.ncbi.nlm.nih.gov/entrez/query.fcgi?cmd=Retrieve&amp;db=pubmed&amp;dopt=Abstract&amp;list_uids=25694432">http://www.ncbi.nlm.nih.gov/entrez/query.fcgi?cmd=Retrieve&amp;db=pubmed&amp;dopt=Abstract&amp;list_uids=25694432</a>  6 J Biol Chem 290 15 Apr 2015 Journal Article,Research Support, Non-U.S. Gov't                                                                                                                                                                                                                                                                                                                                  |
| cul3   | kbtbd6  | <a href="http://www.ncbi.nlm.nih.gov/entrez/query.fcgi?cmd=Retrieve&amp;db=pubmed&amp;dopt=Abstract&amp;list_uids=25684205">http://www.ncbi.nlm.nih.gov/entrez/query.fcgi?cmd=Retrieve&amp;db=pubmed&amp;dopt=Abstract&amp;list_uids=25684205</a>  6 Mol Cell 57 6 Mar 2015 Journal Article,Research Support, Non-U.S. Gov't                                                                                                                                                                                                                                                                                                                                       |
| cul3   | kbtbd7  | <a href="http://www.ncbi.nlm.nih.gov/entrez/query.fcgi?cmd=Retrieve&amp;db=pubmed&amp;dopt=Abstract&amp;list_uids=25684205">http://www.ncbi.nlm.nih.gov/entrez/query.fcgi?cmd=Retrieve&amp;db=pubmed&amp;dopt=Abstract&amp;list_uids=25684205</a>  6 Mol Cell 57 6 Mar 2015 Journal Article,Research Support, Non-U.S. Gov't                                                                                                                                                                                                                                                                                                                                       |
| cul3   | tiam1   | <a href="http://www.ncbi.nlm.nih.gov/entrez/query.fcgi?cmd=Retrieve&amp;db=pubmed&amp;dopt=Abstract&amp;list_uids=25684205">http://www.ncbi.nlm.nih.gov/entrez/query.fcgi?cmd=Retrieve&amp;db=pubmed&amp;dopt=Abstract&amp;list_uids=25684205</a>  6 Mol Cell 57 6 Mar 2015 Journal Article,Research Support, Non-U.S. Gov't                                                                                                                                                                                                                                                                                                                                       |
| cul3   | rac1    | <a href="http://www.ncbi.nlm.nih.gov/entrez/query.fcgi?cmd=Retrieve&amp;db=pubmed&amp;dopt=Abstract&amp;list_uids=25684205">http://www.ncbi.nlm.nih.gov/entrez/query.fcgi?cmd=Retrieve&amp;db=pubmed&amp;dopt=Abstract&amp;list_uids=25684205</a>  6 Mol Cell 57 6 Mar 2015 Journal Article,Research Support, Non-U.S. Gov't                                                                                                                                                                                                                                                                                                                                       |
| cul3   | arhgef2 | <a href="http://www.ncbi.nlm.nih.gov/entrez/query.fcgi?cmd=Retrieve&amp;db=pubmed&amp;dopt=Abstract&amp;list_uids=25684205">http://www.ncbi.nlm.nih.gov/entrez/query.fcgi?cmd=Retrieve&amp;db=pubmed&amp;dopt=Abstract&amp;list_uids=25684205</a>  6 Mol Cell 57 6 Mar 2015 Journal Article,Research Support, Non-U.S. Gov't                                                                                                                                                                                                                                                                                                                                       |
| kbtbd6 | kbtbd7  | <a href="http://www.ncbi.nlm.nih.gov/entrez/query.fcgi?cmd=Retrieve&amp;db=pubmed&amp;dopt=Abstract&amp;list_uids=25684205">http://www.ncbi.nlm.nih.gov/entrez/query.fcgi?cmd=Retrieve&amp;db=pubmed&amp;dopt=Abstract&amp;list_uids=25684205</a>  6 Mol Cell 57 6 Mar 2015 Journal Article,Research Support, Non-U.S. Gov't                                                                                                                                                                                                                                                                                                                                       |
| kbtbd6 | tiam1   | <a href="http://www.ncbi.nlm.nih.gov/entrez/query.fcgi?cmd=Retrieve&amp;db=pubmed&amp;dopt=Abstract&amp;list_uids=25684205">http://www.ncbi.nlm.nih.gov/entrez/query.fcgi?cmd=Retrieve&amp;db=pubmed&amp;dopt=Abstract&amp;list_uids=25684205</a>  6 Mol Cell 57 6 Mar 2015 Journal Article,Research Support, Non-U.S. Gov't                                                                                                                                                                                                                                                                                                                                       |
| kbtbd6 | rac1    | <a href="http://www.ncbi.nlm.nih.gov/entrez/query.fcgi?cmd=Retrieve&amp;db=pubmed&amp;dopt=Abstract&amp;list_uids=25684205">http://www.ncbi.nlm.nih.gov/entrez/query.fcgi?cmd=Retrieve&amp;db=pubmed&amp;dopt=Abstract&amp;list_uids=25684205</a>  6 Mol Cell 57 6 Mar 2015 Journal Article,Research Support, Non-U.S. Gov't                                                                                                                                                                                                                                                                                                                                       |
| kbtbd6 | arhgef2 | <a href="http://www.ncbi.nlm.nih.gov/entrez/query.fcgi?cmd=Retrieve&amp;db=pubmed&amp;dopt=Abstract&amp;list_uids=25684205">http://www.ncbi.nlm.nih.gov/entrez/query.fcgi?cmd=Retrieve&amp;db=pubmed&amp;dopt=Abstract&amp;list_uids=25684205</a>  6 Mol Cell 57 6 Mar 2015 Journal Article,Research Support, Non-U.S. Gov't                                                                                                                                                                                                                                                                                                                                       |

|            |            |                                                                                                                                                                                                                                                                                                                                                                                                                                                                                                                                                                                                                                                                      |
|------------|------------|----------------------------------------------------------------------------------------------------------------------------------------------------------------------------------------------------------------------------------------------------------------------------------------------------------------------------------------------------------------------------------------------------------------------------------------------------------------------------------------------------------------------------------------------------------------------------------------------------------------------------------------------------------------------|
| kbtbd7     | tiam1      | <a href="http://www.ncbi.nlm.nih.gov/entrez/query.fcgi?cmd=Retrieve&amp;db=pubmed&amp;dopt=Abstract&amp;list_uids=25684205">http://www.ncbi.nlm.nih.gov/entrez/query.fcgi?cmd=Retrieve&amp;db=pubmed&amp;dopt=Abstract&amp;list_uids=25684205</a>  6 Mol Cell 57 6 Mar 2015 Journal Article,Research Support, Non-U.S. Gov't                                                                                                                                                                                                                                                                                                                                         |
| kbtbd7     | rac1       | <a href="http://www.ncbi.nlm.nih.gov/entrez/query.fcgi?cmd=Retrieve&amp;db=pubmed&amp;dopt=Abstract&amp;list_uids=25684205">http://www.ncbi.nlm.nih.gov/entrez/query.fcgi?cmd=Retrieve&amp;db=pubmed&amp;dopt=Abstract&amp;list_uids=25684205</a>  6 Mol Cell 57 6 Mar 2015 Journal Article,Research Support, Non-U.S. Gov't                                                                                                                                                                                                                                                                                                                                         |
| kbtbd7     | arhgef2    | <a href="http://www.ncbi.nlm.nih.gov/entrez/query.fcgi?cmd=Retrieve&amp;db=pubmed&amp;dopt=Abstract&amp;list_uids=25684205">http://www.ncbi.nlm.nih.gov/entrez/query.fcgi?cmd=Retrieve&amp;db=pubmed&amp;dopt=Abstract&amp;list_uids=25684205</a>  6 Mol Cell 57 6 Mar 2015 Journal Article,Research Support, Non-U.S. Gov't                                                                                                                                                                                                                                                                                                                                         |
| tiam1      | rac1       | <a href="http://www.ncbi.nlm.nih.gov/entrez/query.fcgi?cmd=Retrieve&amp;db=pubmed&amp;dopt=Abstract&amp;list_uids=25684205">http://www.ncbi.nlm.nih.gov/entrez/query.fcgi?cmd=Retrieve&amp;db=pubmed&amp;dopt=Abstract&amp;list_uids=25684205</a>  6 Mol Cell 57 6 Mar 2015 Journal Article,Research Support, Non-U.S. Gov't                                                                                                                                                                                                                                                                                                                                         |
| tiam1      | arhgef2    | <a href="http://www.ncbi.nlm.nih.gov/entrez/query.fcgi?cmd=Retrieve&amp;db=pubmed&amp;dopt=Abstract&amp;list_uids=25684205">http://www.ncbi.nlm.nih.gov/entrez/query.fcgi?cmd=Retrieve&amp;db=pubmed&amp;dopt=Abstract&amp;list_uids=25684205</a>  6 Mol Cell 57 6 Mar 2015 Journal Article,Research Support, Non-U.S. Gov't                                                                                                                                                                                                                                                                                                                                         |
| rac1       | arhgef2    | <a href="http://www.ncbi.nlm.nih.gov/entrez/query.fcgi?cmd=Retrieve&amp;db=pubmed&amp;dopt=Abstract&amp;list_uids=23615439">http://www.ncbi.nlm.nih.gov/entrez/query.fcgi?cmd=Retrieve&amp;db=pubmed&amp;dopt=Abstract&amp;list_uids=23615439</a>  6 Mol Biol Cell 24 12 Jun 2013 Journal Article,Research Support, N.I.H., Extramural  <a href="http://www.ncbi.nlm.nih.gov/entrez/query.fcgi?cmd=Retrieve&amp;db=pubmed&amp;dopt=Abstract&amp;list_uids=25684205">http://www.ncbi.nlm.nih.gov/entrez/query.fcgi?cmd=Retrieve&amp;db=pubmed&amp;dopt=Abstract&amp;list_uids=25684205</a>  6 Mol Cell 57 6 Mar 2015 Journal Article,Research Support, Non-U.S. Gov't |
| kbtbd6     | gabarap l2 | <a href="http://www.ncbi.nlm.nih.gov/entrez/query.fcgi?cmd=Retrieve&amp;db=pubmed&amp;dopt=Abstract&amp;list_uids=25684205">http://www.ncbi.nlm.nih.gov/entrez/query.fcgi?cmd=Retrieve&amp;db=pubmed&amp;dopt=Abstract&amp;list_uids=25684205</a>  6 Mol Cell 57 6 Mar 2015 Journal Article,Research Support, Non-U.S. Gov't                                                                                                                                                                                                                                                                                                                                         |
| kbtbd6     | gabarap    | <a href="http://www.ncbi.nlm.nih.gov/entrez/query.fcgi?cmd=Retrieve&amp;db=pubmed&amp;dopt=Abstract&amp;list_uids=25684205">http://www.ncbi.nlm.nih.gov/entrez/query.fcgi?cmd=Retrieve&amp;db=pubmed&amp;dopt=Abstract&amp;list_uids=25684205</a>  6 Mol Cell 57 6 Mar 2015 Journal Article,Research Support, Non-U.S. Gov't                                                                                                                                                                                                                                                                                                                                         |
| kbtbd7     | gabarap l2 | <a href="http://www.ncbi.nlm.nih.gov/entrez/query.fcgi?cmd=Retrieve&amp;db=pubmed&amp;dopt=Abstract&amp;list_uids=25684205">http://www.ncbi.nlm.nih.gov/entrez/query.fcgi?cmd=Retrieve&amp;db=pubmed&amp;dopt=Abstract&amp;list_uids=25684205</a>  6 Mol Cell 57 6 Mar 2015 Journal Article,Research Support, Non-U.S. Gov't                                                                                                                                                                                                                                                                                                                                         |
| kbtbd7     | gabarap    | <a href="http://www.ncbi.nlm.nih.gov/entrez/query.fcgi?cmd=Retrieve&amp;db=pubmed&amp;dopt=Abstract&amp;list_uids=25684205">http://www.ncbi.nlm.nih.gov/entrez/query.fcgi?cmd=Retrieve&amp;db=pubmed&amp;dopt=Abstract&amp;list_uids=25684205</a>  6 Mol Cell 57 6 Mar 2015 Journal Article,Research Support, Non-U.S. Gov't                                                                                                                                                                                                                                                                                                                                         |
| gabarap l2 | gabarap    | <a href="http://www.ncbi.nlm.nih.gov/entrez/query.fcgi?cmd=Retrieve&amp;db=pubmed&amp;dopt=Abstract&amp;list_uids=25684205">http://www.ncbi.nlm.nih.gov/entrez/query.fcgi?cmd=Retrieve&amp;db=pubmed&amp;dopt=Abstract&amp;list_uids=25684205</a>  6 Mol Cell 57 6 Mar 2015 Journal Article,Research Support, Non-U.S. Gov't                                                                                                                                                                                                                                                                                                                                         |
| tiam1      | gabarap    | <a href="http://www.ncbi.nlm.nih.gov/entrez/query.fcgi?cmd=Retrieve&amp;db=pubmed&amp;dopt=Abstract&amp;list_uids=25684205">http://www.ncbi.nlm.nih.gov/entrez/query.fcgi?cmd=Retrieve&amp;db=pubmed&amp;dopt=Abstract&amp;list_uids=25684205</a>  6 Mol Cell 57 6 Mar 2015 Journal Article,Research Support, Non-U.S. Gov't                                                                                                                                                                                                                                                                                                                                         |
| stard3     | erbb2      | <a href="http://www.ncbi.nlm.nih.gov/entrez/query.fcgi?cmd=Retrieve&amp;db=pubmed&amp;dopt=Abstract&amp;list_uids=25681734">http://www.ncbi.nlm.nih.gov/entrez/query.fcgi?cmd=Retrieve&amp;db=pubmed&amp;dopt=Abstract&amp;list_uids=25681734</a>  6 Am J Pathol 185 4 Apr 2015 Journal Article,Research Support, Non-U.S. Gov't                                                                                                                                                                                                                                                                                                                                     |
| ca4        | actin      | <a href="http://www.ncbi.nlm.nih.gov/entrez/query.fcgi?cmd=Retrieve&amp;db=pubmed&amp;dopt=Abstract&amp;list_uids=25678082">http://www.ncbi.nlm.nih.gov/entrez/query.fcgi?cmd=Retrieve&amp;db=pubmed&amp;dopt=Abstract&amp;list_uids=25678082</a>  6 Invest New Drugs 33 3 Jun 2015 Journal Article                                                                                                                                                                                                                                                                                                                                                                  |
| ilk        | xrcc1      | <a href="http://www.ncbi.nlm.nih.gov/entrez/query.fcgi?cmd=Retrieve&amp;db=pubmed&amp;dopt=Abstract&amp;list_uids=25657336">http://www.ncbi.nlm.nih.gov/entrez/query.fcgi?cmd=Retrieve&amp;db=pubmed&amp;dopt=Abstract&amp;list_uids=25657336</a>  6 Mol Cancer Ther 14 4 Apr 2015 Journal Article,Research Support, N.I.H., Extramural                                                                                                                                                                                                                                                                                                                              |
| dclk1      | itk        | <a href="http://www.ncbi.nlm.nih.gov/entrez/query.fcgi?cmd=Retrieve&amp;db=pubmed&amp;dopt=Abstract&amp;list_uids=25605241">http://www.ncbi.nlm.nih.gov/entrez/query.fcgi?cmd=Retrieve&amp;db=pubmed&amp;dopt=Abstract&amp;list_uids=25605241</a>  6 Oncotarget 6 4 Feb 2015 Journal Article                                                                                                                                                                                                                                                                                                                                                                         |
| actin      | gli2       | <a href="http://www.ncbi.nlm.nih.gov/entrez/query.fcgi?cmd=Retrieve&amp;db=pubmed&amp;dopt=Abstract&amp;list_uids=25601713">http://www.ncbi.nlm.nih.gov/entrez/query.fcgi?cmd=Retrieve&amp;db=pubmed&amp;dopt=Abstract&amp;list_uids=25601713</a>  6 Biochim Biophys Acta 1853 5 May 2015 Journal Article,Research Support, Non-U.S. Gov't                                                                                                                                                                                                                                                                                                                           |

|         |        |                                                                                                                                                                                                                                                                                                                                                                                                                                                                                                                                                                                                                                                                                            |
|---------|--------|--------------------------------------------------------------------------------------------------------------------------------------------------------------------------------------------------------------------------------------------------------------------------------------------------------------------------------------------------------------------------------------------------------------------------------------------------------------------------------------------------------------------------------------------------------------------------------------------------------------------------------------------------------------------------------------------|
| flna    | mnrn1  | <a href="http://www.ncbi.nlm.nih.gov/entrez/query.fcgi?cmd=Retrieve&amp;db=pubmed&amp;dopt=Abstract&amp;list_uids=25593085">http://www.ncbi.nlm.nih.gov/entrez/query.fcgi?cmd=Retrieve&amp;db=pubmed&amp;dopt=Abstract&amp;list_uids=25593085</a>  6 Biochimie 110 Mar 2015 Journal Article,Research Support, Non-U.S. Gov't                                                                                                                                                                                                                                                                                                                                                               |
| flna    | ptk2   | <a href="http://www.ncbi.nlm.nih.gov/entrez/query.fcgi?cmd=Retrieve&amp;db=pubmed&amp;dopt=Abstract&amp;list_uids=25593085">http://www.ncbi.nlm.nih.gov/entrez/query.fcgi?cmd=Retrieve&amp;db=pubmed&amp;dopt=Abstract&amp;list_uids=25593085</a>  6 Biochimie 110 Mar 2015 Journal Article,Research Support, Non-U.S. Gov't                                                                                                                                                                                                                                                                                                                                                               |
| flna    | p4hb   | <a href="http://www.ncbi.nlm.nih.gov/entrez/query.fcgi?cmd=Retrieve&amp;db=pubmed&amp;dopt=Abstract&amp;list_uids=25593085">http://www.ncbi.nlm.nih.gov/entrez/query.fcgi?cmd=Retrieve&amp;db=pubmed&amp;dopt=Abstract&amp;list_uids=25593085</a>  6 Biochimie 110 Mar 2015 Journal Article,Research Support, Non-U.S. Gov't                                                                                                                                                                                                                                                                                                                                                               |
| pdcl    | pik3ca | <a href="http://www.ncbi.nlm.nih.gov/entrez/query.fcgi?cmd=Retrieve&amp;db=pubmed&amp;dopt=Abstract&amp;list_uids=25588838">http://www.ncbi.nlm.nih.gov/entrez/query.fcgi?cmd=Retrieve&amp;db=pubmed&amp;dopt=Abstract&amp;list_uids=25588838</a>  6 J Cell Sci 128 5 Mar 2015 Journal Article,Research Support, Non-U.S. Gov't                                                                                                                                                                                                                                                                                                                                                            |
| pdcl    | akt1   | <a href="http://www.ncbi.nlm.nih.gov/entrez/query.fcgi?cmd=Retrieve&amp;db=pubmed&amp;dopt=Abstract&amp;list_uids=25588838">http://www.ncbi.nlm.nih.gov/entrez/query.fcgi?cmd=Retrieve&amp;db=pubmed&amp;dopt=Abstract&amp;list_uids=25588838</a>  6 J Cell Sci 128 5 Mar 2015 Journal Article,Research Support, Non-U.S. Gov't                                                                                                                                                                                                                                                                                                                                                            |
| foxo1   | irf4   | <a href="http://www.ncbi.nlm.nih.gov/entrez/query.fcgi?cmd=Retrieve&amp;db=pubmed&amp;dopt=Abstract&amp;list_uids=25584414">http://www.ncbi.nlm.nih.gov/entrez/query.fcgi?cmd=Retrieve&amp;db=pubmed&amp;dopt=Abstract&amp;list_uids=25584414</a>  6 Mol Endocrinol 29 3 Mar 2015 Journal Article,Research Support, N.I.H., Extramural,Research Support, Non-U.S. Gov't                                                                                                                                                                                                                                                                                                                    |
| irf4    | igfbp1 | <a href="http://www.ncbi.nlm.nih.gov/entrez/query.fcgi?cmd=Retrieve&amp;db=pubmed&amp;dopt=Abstract&amp;list_uids=25584414">http://www.ncbi.nlm.nih.gov/entrez/query.fcgi?cmd=Retrieve&amp;db=pubmed&amp;dopt=Abstract&amp;list_uids=25584414</a>  6 Mol Endocrinol 29 3 Mar 2015 Journal Article,Research Support, N.I.H., Extramural,Research Support, Non-U.S. Gov't                                                                                                                                                                                                                                                                                                                    |
| irf4    | prl    | <a href="http://www.ncbi.nlm.nih.gov/entrez/query.fcgi?cmd=Retrieve&amp;db=pubmed&amp;dopt=Abstract&amp;list_uids=25584414">http://www.ncbi.nlm.nih.gov/entrez/query.fcgi?cmd=Retrieve&amp;db=pubmed&amp;dopt=Abstract&amp;list_uids=25584414</a>  6 Mol Endocrinol 29 3 Mar 2015 Journal Article,Research Support, N.I.H., Extramural,Research Support, Non-U.S. Gov't                                                                                                                                                                                                                                                                                                                    |
| irf4    | wnt4   | <a href="http://www.ncbi.nlm.nih.gov/entrez/query.fcgi?cmd=Retrieve&amp;db=pubmed&amp;dopt=Abstract&amp;list_uids=25584414">http://www.ncbi.nlm.nih.gov/entrez/query.fcgi?cmd=Retrieve&amp;db=pubmed&amp;dopt=Abstract&amp;list_uids=25584414</a>  6 Mol Endocrinol 29 3 Mar 2015 Journal Article,Research Support, N.I.H., Extramural,Research Support, Non-U.S. Gov't                                                                                                                                                                                                                                                                                                                    |
| igfbp1  | prl    | <a href="http://www.ncbi.nlm.nih.gov/entrez/query.fcgi?cmd=Retrieve&amp;db=pubmed&amp;dopt=Abstract&amp;list_uids=25584414">http://www.ncbi.nlm.nih.gov/entrez/query.fcgi?cmd=Retrieve&amp;db=pubmed&amp;dopt=Abstract&amp;list_uids=25584414</a>  6 Mol Endocrinol 29 3 Mar 2015 Journal Article,Research Support, N.I.H., Extramural,Research Support, Non-U.S. Gov't                                                                                                                                                                                                                                                                                                                    |
| igfbp1  | wnt4   | <a href="http://www.ncbi.nlm.nih.gov/entrez/query.fcgi?cmd=Retrieve&amp;db=pubmed&amp;dopt=Abstract&amp;list_uids=25584414">http://www.ncbi.nlm.nih.gov/entrez/query.fcgi?cmd=Retrieve&amp;db=pubmed&amp;dopt=Abstract&amp;list_uids=25584414</a>  6 Mol Endocrinol 29 3 Mar 2015 Journal Article,Research Support, N.I.H., Extramural,Research Support, Non-U.S. Gov't                                                                                                                                                                                                                                                                                                                    |
| prl     | wnt4   | <a href="http://www.ncbi.nlm.nih.gov/entrez/query.fcgi?cmd=Retrieve&amp;db=pubmed&amp;dopt=Abstract&amp;list_uids=25584414">http://www.ncbi.nlm.nih.gov/entrez/query.fcgi?cmd=Retrieve&amp;db=pubmed&amp;dopt=Abstract&amp;list_uids=25584414</a>  6 Mol Endocrinol 29 3 Mar 2015 Journal Article,Research Support, N.I.H., Extramural,Research Support, Non-U.S. Gov't                                                                                                                                                                                                                                                                                                                    |
| 3.6.4.1 | ephb2  | <a href="http://www.ncbi.nlm.nih.gov/entrez/query.fcgi?cmd=Retrieve&amp;db=pubmed&amp;dopt=Abstract&amp;list_uids=25550404">http://www.ncbi.nlm.nih.gov/entrez/query.fcgi?cmd=Retrieve&amp;db=pubmed&amp;dopt=Abstract&amp;list_uids=25550404</a>  6 EMBO Rep 16 2 Feb 2015 Journal Article,Research Support, Non-U.S. Gov't                                                                                                                                                                                                                                                                                                                                                               |
| sgsm3   | ephb2  | <a href="http://www.ncbi.nlm.nih.gov/entrez/query.fcgi?cmd=Retrieve&amp;db=pubmed&amp;dopt=Abstract&amp;list_uids=24466271">http://www.ncbi.nlm.nih.gov/entrez/query.fcgi?cmd=Retrieve&amp;db=pubmed&amp;dopt=Abstract&amp;list_uids=24466271</a>  6 PLoS One 9 1 2014 Journal Article,Research Support, N.I.H., Extramural,Research Support, Non-U.S. Gov't  <a href="http://www.ncbi.nlm.nih.gov/entrez/query.fcgi?cmd=Retrieve&amp;db=pubmed&amp;dopt=Abstract&amp;list_uids=25550404">http://www.ncbi.nlm.nih.gov/entrez/query.fcgi?cmd=Retrieve&amp;db=pubmed&amp;dopt=Abstract&amp;list_uids=25550404</a>  6 EMBO Rep 16 2 Feb 2015 Journal Article,Research Support, Non-U.S. Gov't |
| sgsm3   | myh14  | <a href="http://www.ncbi.nlm.nih.gov/entrez/query.fcgi?cmd=Retrieve&amp;db=pubmed&amp;dopt=Abstract&amp;list_uids=25550404">http://www.ncbi.nlm.nih.gov/entrez/query.fcgi?cmd=Retrieve&amp;db=pubmed&amp;dopt=Abstract&amp;list_uids=25550404</a>  6 EMBO Rep 16 2 Feb 2015 Journal Article,Research Support, Non-U.S. Gov't                                                                                                                                                                                                                                                                                                                                                               |
| ephb2   | myh14  | <a href="http://www.ncbi.nlm.nih.gov/entrez/query.fcgi?cmd=Retrieve&amp;db=pubmed&amp;dopt=Abstract&amp;list_uids=25550404">http://www.ncbi.nlm.nih.gov/entrez/query.fcgi?cmd=Retrieve&amp;db=pubmed&amp;dopt=Abstract&amp;list_uids=25550404</a>  6 EMBO Rep 16 2 Feb 2015 Journal Article,Research Support, Non-U.S. Gov't                                                                                                                                                                                                                                                                                                                                                               |
| mnrn1   | has2   | <a href="http://www.ncbi.nlm.nih.gov/entrez/query.fcgi?cmd=Retrieve&amp;db=pubmed&amp;dopt=Abstract&amp;list_uids=25549589">http://www.ncbi.nlm.nih.gov/entrez/query.fcgi?cmd=Retrieve&amp;db=pubmed&amp;dopt=Abstract&amp;list_uids=25549589</a>  6 Matrix Biol 42 Mar 2015 Journal Article,Research Support, N.I.H., Extramural                                                                                                                                                                                                                                                                                                                                                          |

|       |        |                                                                                                                                                                                                                                                                                                                                                                                                                                                                                                                                                                                                                                                                                                                                                                                                                                                                                                                                                                                                                                                                                                                                                                                                                                                                                                                                                 |
|-------|--------|-------------------------------------------------------------------------------------------------------------------------------------------------------------------------------------------------------------------------------------------------------------------------------------------------------------------------------------------------------------------------------------------------------------------------------------------------------------------------------------------------------------------------------------------------------------------------------------------------------------------------------------------------------------------------------------------------------------------------------------------------------------------------------------------------------------------------------------------------------------------------------------------------------------------------------------------------------------------------------------------------------------------------------------------------------------------------------------------------------------------------------------------------------------------------------------------------------------------------------------------------------------------------------------------------------------------------------------------------|
| actin | has2   | <a href="http://www.ncbi.nlm.nih.gov/entrez/query.fcgi?cmd=Retrieve&amp;db=pubmed&amp;dopt=Abstract&amp;list_uids=25549589">http://www.ncbi.nlm.nih.gov/entrez/query.fcgi?cmd=Retrieve&amp;db=pubmed&amp;dopt=Abstract&amp;list_uids=25549589</a> [6]Matrix Biol[42][Mar]2015 Journal Article,Research Support, N.I.H., Extramural                                                                                                                                                                                                                                                                                                                                                                                                                                                                                                                                                                                                                                                                                                                                                                                                                                                                                                                                                                                                              |
| actin | cd44   | <a href="http://www.ncbi.nlm.nih.gov/entrez/query.fcgi?cmd=Retrieve&amp;db=pubmed&amp;dopt=Abstract&amp;list_uids=25549589">http://www.ncbi.nlm.nih.gov/entrez/query.fcgi?cmd=Retrieve&amp;db=pubmed&amp;dopt=Abstract&amp;list_uids=25549589</a> [6]Matrix Biol[42][Mar]2015 Journal Article,Research Support, N.I.H., Extramural                                                                                                                                                                                                                                                                                                                                                                                                                                                                                                                                                                                                                                                                                                                                                                                                                                                                                                                                                                                                              |
| rac1  | myh14  | <a href="http://www.ncbi.nlm.nih.gov/entrez/query.fcgi?cmd=Retrieve&amp;db=pubmed&amp;dopt=Abstract&amp;list_uids=25544611">http://www.ncbi.nlm.nih.gov/entrez/query.fcgi?cmd=Retrieve&amp;db=pubmed&amp;dopt=Abstract&amp;list_uids=25544611</a> [6]Curr Biol[25][2]Jan[2015]Journal Article,Research Support, N.I.H., Extramural,Research Support, N.I.H., Intramural  <a href="http://www.ncbi.nlm.nih.gov/entrez/query.fcgi?cmd=Retrieve&amp;db=pubmed&amp;dopt=Abstract&amp;list_uids=24980436">http://www.ncbi.nlm.nih.gov/entrez/query.fcgi?cmd=Retrieve&amp;db=pubmed&amp;dopt=Abstract&amp;list_uids=24980436</a> [6]Mol Cell Biol[34][18]Sep[2014]Journal Article,Research Support, Non-U.S. Gov't  <a href="http://www.ncbi.nlm.nih.gov/entrez/query.fcgi?cmd=Retrieve&amp;db=pubmed&amp;dopt=Abstract&amp;list_uids=23979717">http://www.ncbi.nlm.nih.gov/entrez/query.fcgi?cmd=Retrieve&amp;db=pubmed&amp;dopt=Abstract&amp;list_uids=23979717</a> [6]J Cell Biol[202][5]Sep[2013]Journal Article,Research Support, N.I.H., Extramural,Research Support, Non-U.S. Gov't,Research Support, U.S. Gov't, Non-P.H.S.                                                                                                                                                                                                                   |
| rac1  | actin  | <a href="http://www.ncbi.nlm.nih.gov/entrez/query.fcgi?cmd=Retrieve&amp;db=pubmed&amp;dopt=Abstract&amp;list_uids=25544611">http://www.ncbi.nlm.nih.gov/entrez/query.fcgi?cmd=Retrieve&amp;db=pubmed&amp;dopt=Abstract&amp;list_uids=25544611</a> [6]Curr Biol[25][2]Jan[2015]Journal Article,Research Support, N.I.H., Extramural,Research Support, N.I.H., Intramural  <a href="http://www.ncbi.nlm.nih.gov/entrez/query.fcgi?cmd=Retrieve&amp;db=pubmed&amp;dopt=Abstract&amp;list_uids=23826261">http://www.ncbi.nlm.nih.gov/entrez/query.fcgi?cmd=Retrieve&amp;db=pubmed&amp;dopt=Abstract&amp;list_uids=23826261</a> [6]PLoS One[8][6][2013]Journal Article,Research Support, Non-U.S. Gov't  <a href="http://www.ncbi.nlm.nih.gov/entrez/query.fcgi?cmd=Retrieve&amp;db=pubmed&amp;dopt=Abstract&amp;list_uids=22879066">http://www.ncbi.nlm.nih.gov/entrez/query.fcgi?cmd=Retrieve&amp;db=pubmed&amp;dopt=Abstract&amp;list_uids=22879066</a> [6]Adv Exp Med Biol[986][2013]Journal Article,Review  <a href="http://www.ncbi.nlm.nih.gov/entrez/query.fcgi?cmd=Retrieve&amp;db=pubmed&amp;dopt=Abstract&amp;list_uids=23132927">http://www.ncbi.nlm.nih.gov/entrez/query.fcgi?cmd=Retrieve&amp;db=pubmed&amp;dopt=Abstract&amp;list_uids=23132927</a> [6]J Cell Sci[126][Pt 1]Jan[2013]Journal Article,Research Support, Non-U.S. Gov't |
| pkc   | rac1   | <a href="http://www.ncbi.nlm.nih.gov/entrez/query.fcgi?cmd=Retrieve&amp;db=pubmed&amp;dopt=Abstract&amp;list_uids=25544611">http://www.ncbi.nlm.nih.gov/entrez/query.fcgi?cmd=Retrieve&amp;db=pubmed&amp;dopt=Abstract&amp;list_uids=25544611</a> [6]Curr Biol[25][2]Jan[2015]Journal Article,Research Support, N.I.H., Extramural,Research Support, N.I.H., Intramural                                                                                                                                                                                                                                                                                                                                                                                                                                                                                                                                                                                                                                                                                                                                                                                                                                                                                                                                                                         |
| fas   | pkc    | <a href="http://www.ncbi.nlm.nih.gov/entrez/query.fcgi?cmd=Retrieve&amp;db=pubmed&amp;dopt=Abstract&amp;list_uids=25544611">http://www.ncbi.nlm.nih.gov/entrez/query.fcgi?cmd=Retrieve&amp;db=pubmed&amp;dopt=Abstract&amp;list_uids=25544611</a> [6]Curr Biol[25][2]Jan[2015]Journal Article,Research Support, N.I.H., Extramural,Research Support, N.I.H., Intramural                                                                                                                                                                                                                                                                                                                                                                                                                                                                                                                                                                                                                                                                                                                                                                                                                                                                                                                                                                         |
| mmrn1 | pkc    | <a href="http://www.ncbi.nlm.nih.gov/entrez/query.fcgi?cmd=Retrieve&amp;db=pubmed&amp;dopt=Abstract&amp;list_uids=25544611">http://www.ncbi.nlm.nih.gov/entrez/query.fcgi?cmd=Retrieve&amp;db=pubmed&amp;dopt=Abstract&amp;list_uids=25544611</a> [6]Curr Biol[25][2]Jan[2015]Journal Article,Research Support, N.I.H., Extramural,Research Support, N.I.H., Intramural                                                                                                                                                                                                                                                                                                                                                                                                                                                                                                                                                                                                                                                                                                                                                                                                                                                                                                                                                                         |
| cd44  | itgb1  | <a href="http://www.ncbi.nlm.nih.gov/entrez/query.fcgi?cmd=Retrieve&amp;db=pubmed&amp;dopt=Abstract&amp;list_uids=25534714">http://www.ncbi.nlm.nih.gov/entrez/query.fcgi?cmd=Retrieve&amp;db=pubmed&amp;dopt=Abstract&amp;list_uids=25534714</a> [6]Biochim Biophys Acta[1848][3]Mar[2015]Journal Article,Research Support, Non-U.S. Gov't                                                                                                                                                                                                                                                                                                                                                                                                                                                                                                                                                                                                                                                                                                                                                                                                                                                                                                                                                                                                     |
| cd44  | vegfa  | <a href="http://www.ncbi.nlm.nih.gov/entrez/query.fcgi?cmd=Retrieve&amp;db=pubmed&amp;dopt=Abstract&amp;list_uids=25534714">http://www.ncbi.nlm.nih.gov/entrez/query.fcgi?cmd=Retrieve&amp;db=pubmed&amp;dopt=Abstract&amp;list_uids=25534714</a> [6]Biochim Biophys Acta[1848][3]Mar[2015]Journal Article,Research Support, Non-U.S. Gov't                                                                                                                                                                                                                                                                                                                                                                                                                                                                                                                                                                                                                                                                                                                                                                                                                                                                                                                                                                                                     |
| itgb1 | vegfa  | <a href="http://www.ncbi.nlm.nih.gov/entrez/query.fcgi?cmd=Retrieve&amp;db=pubmed&amp;dopt=Abstract&amp;list_uids=25534714">http://www.ncbi.nlm.nih.gov/entrez/query.fcgi?cmd=Retrieve&amp;db=pubmed&amp;dopt=Abstract&amp;list_uids=25534714</a> [6]Biochim Biophys Acta[1848][3]Mar[2015]Journal Article,Research Support, Non-U.S. Gov't                                                                                                                                                                                                                                                                                                                                                                                                                                                                                                                                                                                                                                                                                                                                                                                                                                                                                                                                                                                                     |
| actin | mtg1   | <a href="http://www.ncbi.nlm.nih.gov/entrez/query.fcgi?cmd=Retrieve&amp;db=pubmed&amp;dopt=Abstract&amp;list_uids=25530216">http://www.ncbi.nlm.nih.gov/entrez/query.fcgi?cmd=Retrieve&amp;db=pubmed&amp;dopt=Abstract&amp;list_uids=25530216</a> [6]Cell Signal[27][3]Mar[2015]Journal Article,Research Support, Non-U.S. Gov't                                                                                                                                                                                                                                                                                                                                                                                                                                                                                                                                                                                                                                                                                                                                                                                                                                                                                                                                                                                                                |
| actin | cdkn2a | <a href="http://www.ncbi.nlm.nih.gov/entrez/query.fcgi?cmd=Retrieve&amp;db=pubmed&amp;dopt=Abstract&amp;list_uids=25530216">http://www.ncbi.nlm.nih.gov/entrez/query.fcgi?cmd=Retrieve&amp;db=pubmed&amp;dopt=Abstract&amp;list_uids=25530216</a> [6]Cell Signal[27][3]Mar[2015]Journal Article,Research Support, Non-U.S. Gov't                                                                                                                                                                                                                                                                                                                                                                                                                                                                                                                                                                                                                                                                                                                                                                                                                                                                                                                                                                                                                |
| mtg1  | cdkn2a | <a href="http://www.ncbi.nlm.nih.gov/entrez/query.fcgi?cmd=Retrieve&amp;db=pubmed&amp;dopt=Abstract&amp;list_uids=25530216">http://www.ncbi.nlm.nih.gov/entrez/query.fcgi?cmd=Retrieve&amp;db=pubmed&amp;dopt=Abstract&amp;list_uids=25530216</a> [6]Cell                                                                                                                                                                                                                                                                                                                                                                                                                                                                                                                                                                                                                                                                                                                                                                                                                                                                                                                                                                                                                                                                                       |



|       |        |                                                                                                                                                                                                                                                                                                                                                                                                                                                                                                                                                                                                                                                                                  |
|-------|--------|----------------------------------------------------------------------------------------------------------------------------------------------------------------------------------------------------------------------------------------------------------------------------------------------------------------------------------------------------------------------------------------------------------------------------------------------------------------------------------------------------------------------------------------------------------------------------------------------------------------------------------------------------------------------------------|
|       |        | Signal 27 3 Mar 2015 Journal Article,Research Support, Non-U.S. Gov't  <a href="http://www.ncbi.nlm.nih.gov/entrez/query.fcgi?cmd=Retrieve&amp;db=pubmed&amp;dopt=Abstract&amp;list_uids=23129116">http://www.ncbi.nlm.nih.gov/entrez/query.fcgi?cmd=Retrieve&amp;db=pubmed&amp;dopt=Abstract&amp;list_uids=23129116</a>  6 Cur r Protoc Cell Biol Chapter 17 Jun 2012 Journal Article,Research Support, Non-U.S. Gov't,Review                                                                                                                                                                                                                                                   |
| arf1  | egf    | <a href="http://www.ncbi.nlm.nih.gov/entrez/query.fcgi?cmd=Retrieve&amp;db=pubmed&amp;dopt=Abstract&amp;list_uids=25530216">http://www.ncbi.nlm.nih.gov/entrez/query.fcgi?cmd=Retrieve&amp;db=pubmed&amp;dopt=Abstract&amp;list_uids=25530216</a>  6 Cell Signal 27 3 Mar 2015 Journal Article,Research Support, Non-U.S. Gov't                                                                                                                                                                                                                                                                                                                                                  |
| arf1  | ptk2   | <a href="http://www.ncbi.nlm.nih.gov/entrez/query.fcgi?cmd=Retrieve&amp;db=pubmed&amp;dopt=Abstract&amp;list_uids=25530216">http://www.ncbi.nlm.nih.gov/entrez/query.fcgi?cmd=Retrieve&amp;db=pubmed&amp;dopt=Abstract&amp;list_uids=25530216</a>  6 Cell Signal 27 3 Mar 2015 Journal Article,Research Support, Non-U.S. Gov't                                                                                                                                                                                                                                                                                                                                                  |
| arf1  | src    | <a href="http://www.ncbi.nlm.nih.gov/entrez/query.fcgi?cmd=Retrieve&amp;db=pubmed&amp;dopt=Abstract&amp;list_uids=25530216">http://www.ncbi.nlm.nih.gov/entrez/query.fcgi?cmd=Retrieve&amp;db=pubmed&amp;dopt=Abstract&amp;list_uids=25530216</a>  6 Cell Signal 27 3 Mar 2015 Journal Article,Research Support, Non-U.S. Gov't                                                                                                                                                                                                                                                                                                                                                  |
| dlc1  | rho    | <a href="http://www.ncbi.nlm.nih.gov/entrez/query.fcgi?cmd=Retrieve&amp;db=pubmed&amp;dopt=Abstract&amp;list_uids=25525271">http://www.ncbi.nlm.nih.gov/entrez/query.fcgi?cmd=Retrieve&amp;db=pubmed&amp;dopt=Abstract&amp;list_uids=25525271</a>  6 J Biol Chem 290 7 Feb 2015 Journal Article,Research Support, Non-U.S. Gov't                                                                                                                                                                                                                                                                                                                                                 |
| dlc1  | rasa1  | <a href="http://www.ncbi.nlm.nih.gov/entrez/query.fcgi?cmd=Retrieve&amp;db=pubmed&amp;dopt=Abstract&amp;list_uids=25525271">http://www.ncbi.nlm.nih.gov/entrez/query.fcgi?cmd=Retrieve&amp;db=pubmed&amp;dopt=Abstract&amp;list_uids=25525271</a>  6 J Biol Chem 290 7 Feb 2015 Journal Article,Research Support, Non-U.S. Gov't  <a href="http://www.ncbi.nlm.nih.gov/entrez/query.fcgi?cmd=Retrieve&amp;db=pubmed&amp;dopt=Abstract&amp;list_uids=25448629">http://www.ncbi.nlm.nih.gov/entrez/query.fcgi?cmd=Retrieve&amp;db=pubmed&amp;dopt=Abstract&amp;list_uids=25448629</a>  6 Cyt oskeleton (Hoboken) 71 12 Dec 2014 Journal Article,Research Support, Non-U.S. Gov't   |
| rho   | rasa1  | <a href="http://www.ncbi.nlm.nih.gov/entrez/query.fcgi?cmd=Retrieve&amp;db=pubmed&amp;dopt=Abstract&amp;list_uids=25525271">http://www.ncbi.nlm.nih.gov/entrez/query.fcgi?cmd=Retrieve&amp;db=pubmed&amp;dopt=Abstract&amp;list_uids=25525271</a>  6 J Biol Chem 290 7 Feb 2015 Journal Article,Research Support, Non-U.S. Gov't                                                                                                                                                                                                                                                                                                                                                 |
| egf   | rasa1  | <a href="http://www.ncbi.nlm.nih.gov/entrez/query.fcgi?cmd=Retrieve&amp;db=pubmed&amp;dopt=Abstract&amp;list_uids=25525271">http://www.ncbi.nlm.nih.gov/entrez/query.fcgi?cmd=Retrieve&amp;db=pubmed&amp;dopt=Abstract&amp;list_uids=25525271</a>  6 J Biol Chem 290 7 Feb 2015 Journal Article,Research Support, Non-U.S. Gov't                                                                                                                                                                                                                                                                                                                                                 |
| egf   | dlc1   | <a href="http://www.ncbi.nlm.nih.gov/entrez/query.fcgi?cmd=Retrieve&amp;db=pubmed&amp;dopt=Abstract&amp;list_uids=25525271">http://www.ncbi.nlm.nih.gov/entrez/query.fcgi?cmd=Retrieve&amp;db=pubmed&amp;dopt=Abstract&amp;list_uids=25525271</a>  6 J Biol Chem 290 7 Feb 2015 Journal Article,Research Support, Non-U.S. Gov't  <a href="http://www.ncbi.nlm.nih.gov/entrez/query.fcgi?cmd=Retrieve&amp;db=pubmed&amp;dopt=Abstract&amp;list_uids=22307599">http://www.ncbi.nlm.nih.gov/entrez/query.fcgi?cmd=Retrieve&amp;db=pubmed&amp;dopt=Abstract&amp;list_uids=22307599</a>  6 Pro c Natl Acad Sci U S A 109 5 Jan 2012 Journal Article,Research Support, Non-U.S. Gov't |
| egf   | ephb2  | <a href="http://www.ncbi.nlm.nih.gov/entrez/query.fcgi?cmd=Retrieve&amp;db=pubmed&amp;dopt=Abstract&amp;list_uids=25525271">http://www.ncbi.nlm.nih.gov/entrez/query.fcgi?cmd=Retrieve&amp;db=pubmed&amp;dopt=Abstract&amp;list_uids=25525271</a>  6 J Biol Chem 290 7 Feb 2015 Journal Article,Research Support, Non-U.S. Gov't                                                                                                                                                                                                                                                                                                                                                 |
| egf   | ppp2r4 | <a href="http://www.ncbi.nlm.nih.gov/entrez/query.fcgi?cmd=Retrieve&amp;db=pubmed&amp;dopt=Abstract&amp;list_uids=25525271">http://www.ncbi.nlm.nih.gov/entrez/query.fcgi?cmd=Retrieve&amp;db=pubmed&amp;dopt=Abstract&amp;list_uids=25525271</a>  6 J Biol Chem 290 7 Feb 2015 Journal Article,Research Support, Non-U.S. Gov't                                                                                                                                                                                                                                                                                                                                                 |
| rasa1 | ephb2  | <a href="http://www.ncbi.nlm.nih.gov/entrez/query.fcgi?cmd=Retrieve&amp;db=pubmed&amp;dopt=Abstract&amp;list_uids=25525271">http://www.ncbi.nlm.nih.gov/entrez/query.fcgi?cmd=Retrieve&amp;db=pubmed&amp;dopt=Abstract&amp;list_uids=25525271</a>  6 J Biol Chem 290 7 Feb 2015 Journal Article,Research Support, Non-U.S. Gov't                                                                                                                                                                                                                                                                                                                                                 |
| rasa1 | ppp2r4 | <a href="http://www.ncbi.nlm.nih.gov/entrez/query.fcgi?cmd=Retrieve&amp;db=pubmed&amp;dopt=Abstract&amp;list_uids=25525271">http://www.ncbi.nlm.nih.gov/entrez/query.fcgi?cmd=Retrieve&amp;db=pubmed&amp;dopt=Abstract&amp;list_uids=25525271</a>  6 J Biol Chem 290 7 Feb 2015 Journal Article,Research Support, Non-U.S. Gov't                                                                                                                                                                                                                                                                                                                                                 |
| dlc1  | ephb2  | <a href="http://www.ncbi.nlm.nih.gov/entrez/query.fcgi?cmd=Retrieve&amp;db=pubmed&amp;dopt=Abstract&amp;list_uids=25525271">http://www.ncbi.nlm.nih.gov/entrez/query.fcgi?cmd=Retrieve&amp;db=pubmed&amp;dopt=Abstract&amp;list_uids=25525271</a>  6 J Biol Chem 290 7 Feb 2015 Journal Article,Research Support, Non-U.S. Gov't                                                                                                                                                                                                                                                                                                                                                 |
| dlc1  | ppp2r4 | <a href="http://www.ncbi.nlm.nih.gov/entrez/query.fcgi?cmd=Retrieve&amp;db=pubmed&amp;dopt=Abstract&amp;list_uids=25525271">http://www.ncbi.nlm.nih.gov/entrez/query.fcgi?cmd=Retrieve&amp;db=pubmed&amp;dopt=Abstract&amp;list_uids=25525271</a>  6 J Biol Chem 290 7 Feb 2015 Journal Article,Research Support, Non-U.S. Gov't                                                                                                                                                                                                                                                                                                                                                 |
| ephb2 | ppp2r4 | <a href="http://www.ncbi.nlm.nih.gov/entrez/query.fcgi?cmd=Retrieve&amp;db=pubmed&amp;dopt=Abstract&amp;list_uids=25525271">http://www.ncbi.nlm.nih.gov/entrez/query.fcgi?cmd=Retrieve&amp;db=pubmed&amp;dopt=Abstract&amp;list_uids=25525271</a>  6 J Biol                                                                                                                                                                                                                                                                                                                                                                                                                      |

|       |         |                                                                                                                                                                                                                                                                                                                                                                                                                                                                                                                                                                    |
|-------|---------|--------------------------------------------------------------------------------------------------------------------------------------------------------------------------------------------------------------------------------------------------------------------------------------------------------------------------------------------------------------------------------------------------------------------------------------------------------------------------------------------------------------------------------------------------------------------|
|       |         | Chem 290 7 Feb 2015 Journal Article,Research Support, Non-U.S. Gov't                                                                                                                                                                                                                                                                                                                                                                                                                                                                                               |
| dpp9  | dpp8    | <a href="http://www.ncbi.nlm.nih.gov/entrez/query.fcgi?cmd=Retrieve&amp;db=pubmed&amp;dopt=Abstract&amp;list_uids=25486458">http://www.ncbi.nlm.nih.gov/entrez/query.fcgi?cmd=Retrieve&amp;db=pubmed&amp;dopt=Abstract&amp;list_uids=25486458</a>  6 Biochim Biophys Acta 1853 2 Feb 2015 Journal Article,Research Support, Non-U.S. Gov't                                                                                                                                                                                                                         |
| ptk2  | hcfc1r1 | <a href="http://www.ncbi.nlm.nih.gov/entrez/query.fcgi?cmd=Retrieve&amp;db=pubmed&amp;dopt=Abstract&amp;list_uids=25486428">http://www.ncbi.nlm.nih.gov/entrez/query.fcgi?cmd=Retrieve&amp;db=pubmed&amp;dopt=Abstract&amp;list_uids=25486428</a>  6 Oncogene 34 35 Aug 2015 Journal Article,Research Support, Non-U.S. Gov't                                                                                                                                                                                                                                      |
| actin | csk     | <a href="http://www.ncbi.nlm.nih.gov/entrez/query.fcgi?cmd=Retrieve&amp;db=pubmed&amp;dopt=Abstract&amp;list_uids=25482640">http://www.ncbi.nlm.nih.gov/entrez/query.fcgi?cmd=Retrieve&amp;db=pubmed&amp;dopt=Abstract&amp;list_uids=25482640</a>  6 Cell Adh Migr 8 6  2014 Journal Article,Research Support, N.I.H., Extramural                                                                                                                                                                                                                                  |
| lims1 | actin   | <a href="http://www.ncbi.nlm.nih.gov/entrez/query.fcgi?cmd=Retrieve&amp;db=pubmed&amp;dopt=Abstract&amp;list_uids=25482629">http://www.ncbi.nlm.nih.gov/entrez/query.fcgi?cmd=Retrieve&amp;db=pubmed&amp;dopt=Abstract&amp;list_uids=25482629</a>  6 Cell Adh Migr 9 3  2015 Journal Article,Research Support, U.S. Gov't, Non-P.H.S.                                                                                                                                                                                                                              |
| ipp   | actin   | <a href="http://www.ncbi.nlm.nih.gov/entrez/query.fcgi?cmd=Retrieve&amp;db=pubmed&amp;dopt=Abstract&amp;list_uids=25482629">http://www.ncbi.nlm.nih.gov/entrez/query.fcgi?cmd=Retrieve&amp;db=pubmed&amp;dopt=Abstract&amp;list_uids=25482629</a>  6 Cell Adh Migr 9 3  2015 Journal Article,Research Support, U.S. Gov't, Non-P.H.S.                                                                                                                                                                                                                              |
| ilk   | rsu1    | <a href="http://www.ncbi.nlm.nih.gov/entrez/query.fcgi?cmd=Retrieve&amp;db=pubmed&amp;dopt=Abstract&amp;list_uids=25482629">http://www.ncbi.nlm.nih.gov/entrez/query.fcgi?cmd=Retrieve&amp;db=pubmed&amp;dopt=Abstract&amp;list_uids=25482629</a>  6 Cell Adh Migr 9 3  2015 Journal Article,Research Support, U.S. Gov't, Non-P.H.S.                                                                                                                                                                                                                              |
| lims1 | rsu1    | <a href="http://www.ncbi.nlm.nih.gov/entrez/query.fcgi?cmd=Retrieve&amp;db=pubmed&amp;dopt=Abstract&amp;list_uids=25482629">http://www.ncbi.nlm.nih.gov/entrez/query.fcgi?cmd=Retrieve&amp;db=pubmed&amp;dopt=Abstract&amp;list_uids=25482629</a>  6 Cell Adh Migr 9 3  2015 Journal Article,Research Support, U.S. Gov't, Non-P.H.S.                                                                                                                                                                                                                              |
| rsu1  | fas     | <a href="http://www.ncbi.nlm.nih.gov/entrez/query.fcgi?cmd=Retrieve&amp;db=pubmed&amp;dopt=Abstract&amp;list_uids=25482629">http://www.ncbi.nlm.nih.gov/entrez/query.fcgi?cmd=Retrieve&amp;db=pubmed&amp;dopt=Abstract&amp;list_uids=25482629</a>  6 Cell Adh Migr 9 3  2015 Journal Article,Research Support, U.S. Gov't, Non-P.H.S.                                                                                                                                                                                                                              |
| lims1 | fas     | <a href="http://www.ncbi.nlm.nih.gov/entrez/query.fcgi?cmd=Retrieve&amp;db=pubmed&amp;dopt=Abstract&amp;list_uids=25482629">http://www.ncbi.nlm.nih.gov/entrez/query.fcgi?cmd=Retrieve&amp;db=pubmed&amp;dopt=Abstract&amp;list_uids=25482629</a>  6 Cell Adh Migr 9 3  2015 Journal Article,Research Support, U.S. Gov't, Non-P.H.S.                                                                                                                                                                                                                              |
| rsu1  | egf     | <a href="http://www.ncbi.nlm.nih.gov/entrez/query.fcgi?cmd=Retrieve&amp;db=pubmed&amp;dopt=Abstract&amp;list_uids=25482629">http://www.ncbi.nlm.nih.gov/entrez/query.fcgi?cmd=Retrieve&amp;db=pubmed&amp;dopt=Abstract&amp;list_uids=25482629</a>  6 Cell Adh Migr 9 3  2015 Journal Article,Research Support, U.S. Gov't, Non-P.H.S.                                                                                                                                                                                                                              |
| rsu1  | mapk14  | <a href="http://www.ncbi.nlm.nih.gov/entrez/query.fcgi?cmd=Retrieve&amp;db=pubmed&amp;dopt=Abstract&amp;list_uids=25482629">http://www.ncbi.nlm.nih.gov/entrez/query.fcgi?cmd=Retrieve&amp;db=pubmed&amp;dopt=Abstract&amp;list_uids=25482629</a>  6 Cell Adh Migr 9 3  2015 Journal Article,Research Support, U.S. Gov't, Non-P.H.S.                                                                                                                                                                                                                              |
| rsu1  | atf2    | <a href="http://www.ncbi.nlm.nih.gov/entrez/query.fcgi?cmd=Retrieve&amp;db=pubmed&amp;dopt=Abstract&amp;list_uids=25482629">http://www.ncbi.nlm.nih.gov/entrez/query.fcgi?cmd=Retrieve&amp;db=pubmed&amp;dopt=Abstract&amp;list_uids=25482629</a>  6 Cell Adh Migr 9 3  2015 Journal Article,Research Support, U.S. Gov't, Non-P.H.S.                                                                                                                                                                                                                              |
| rsu1  | ipp     | <a href="http://www.ncbi.nlm.nih.gov/entrez/query.fcgi?cmd=Retrieve&amp;db=pubmed&amp;dopt=Abstract&amp;list_uids=25482629">http://www.ncbi.nlm.nih.gov/entrez/query.fcgi?cmd=Retrieve&amp;db=pubmed&amp;dopt=Abstract&amp;list_uids=25482629</a>  6 Cell Adh Migr 9 3  2015 Journal Article,Research Support, U.S. Gov't, Non-P.H.S.                                                                                                                                                                                                                              |
| lims1 | egf     | <a href="http://www.ncbi.nlm.nih.gov/entrez/query.fcgi?cmd=Retrieve&amp;db=pubmed&amp;dopt=Abstract&amp;list_uids=25482629">http://www.ncbi.nlm.nih.gov/entrez/query.fcgi?cmd=Retrieve&amp;db=pubmed&amp;dopt=Abstract&amp;list_uids=25482629</a>  6 Cell Adh Migr 9 3  2015 Journal Article,Research Support, U.S. Gov't, Non-P.H.S.                                                                                                                                                                                                                              |
| lims1 | mapk14  | <a href="http://www.ncbi.nlm.nih.gov/entrez/query.fcgi?cmd=Retrieve&amp;db=pubmed&amp;dopt=Abstract&amp;list_uids=25482629">http://www.ncbi.nlm.nih.gov/entrez/query.fcgi?cmd=Retrieve&amp;db=pubmed&amp;dopt=Abstract&amp;list_uids=25482629</a>  6 Cell Adh Migr 9 3  2015 Journal Article,Research Support, U.S. Gov't, Non-P.H.S.                                                                                                                                                                                                                              |
| lims1 | atf2    | <a href="http://www.ncbi.nlm.nih.gov/entrez/query.fcgi?cmd=Retrieve&amp;db=pubmed&amp;dopt=Abstract&amp;list_uids=25482629">http://www.ncbi.nlm.nih.gov/entrez/query.fcgi?cmd=Retrieve&amp;db=pubmed&amp;dopt=Abstract&amp;list_uids=25482629</a>  6 Cell Adh Migr 9 3  2015 Journal Article,Research Support, U.S. Gov't, Non-P.H.S.                                                                                                                                                                                                                              |
| egf   | mapk14  | <a href="http://www.ncbi.nlm.nih.gov/entrez/query.fcgi?cmd=Retrieve&amp;db=pubmed&amp;dopt=Abstract&amp;list_uids=25014166">http://www.ncbi.nlm.nih.gov/entrez/query.fcgi?cmd=Retrieve&amp;db=pubmed&amp;dopt=Abstract&amp;list_uids=25014166</a>  6 Biochim Biophys Acta 1843 11 Nov 2014 Journal Article  <a href="http://www.ncbi.nlm.nih.gov/entrez/query.fcgi?cmd=Retrieve&amp;db=pubmed&amp;dopt=Abstract&amp;list_uids=25482629">http://www.ncbi.nlm.nih.gov/entrez/query.fcgi?cmd=Retrieve&amp;db=pubmed&amp;dopt=Abstract&amp;list_uids=25482629</a>  6 C |

|         |         |                                                                                                                                                                                                                                                                                                                                                                                                                                                                                                                                                                                                                                                                                                                                                                                                                                                                                                                                                                                                                                                                                                                                                                                                                                                                                                                                                                                                                                                                                                                                                                                                                                                                                     |
|---------|---------|-------------------------------------------------------------------------------------------------------------------------------------------------------------------------------------------------------------------------------------------------------------------------------------------------------------------------------------------------------------------------------------------------------------------------------------------------------------------------------------------------------------------------------------------------------------------------------------------------------------------------------------------------------------------------------------------------------------------------------------------------------------------------------------------------------------------------------------------------------------------------------------------------------------------------------------------------------------------------------------------------------------------------------------------------------------------------------------------------------------------------------------------------------------------------------------------------------------------------------------------------------------------------------------------------------------------------------------------------------------------------------------------------------------------------------------------------------------------------------------------------------------------------------------------------------------------------------------------------------------------------------------------------------------------------------------|
|         |         | ell Adh Migr 9 3  2015 Journal Article,Research Support, U.S. Gov't, Non-P.H.S.                                                                                                                                                                                                                                                                                                                                                                                                                                                                                                                                                                                                                                                                                                                                                                                                                                                                                                                                                                                                                                                                                                                                                                                                                                                                                                                                                                                                                                                                                                                                                                                                     |
| egf     | atf2    | <a href="http://www.ncbi.nlm.nih.gov/entrez/query.fcgi?cmd=Retrieve&amp;db=pubmed&amp;dopt=Abstract&amp;list_uids=25482629">http://www.ncbi.nlm.nih.gov/entrez/query.fcgi?cmd=Retrieve&amp;db=pubmed&amp;dopt=Abstract&amp;list_uids=25482629</a>  6 Cell Adh Migr 9 3  2015 Journal Article,Research Support, U.S. Gov't, Non-P.H.S.                                                                                                                                                                                                                                                                                                                                                                                                                                                                                                                                                                                                                                                                                                                                                                                                                                                                                                                                                                                                                                                                                                                                                                                                                                                                                                                                               |
| egf     | ipp     | <a href="http://www.ncbi.nlm.nih.gov/entrez/query.fcgi?cmd=Retrieve&amp;db=pubmed&amp;dopt=Abstract&amp;list_uids=25482629">http://www.ncbi.nlm.nih.gov/entrez/query.fcgi?cmd=Retrieve&amp;db=pubmed&amp;dopt=Abstract&amp;list_uids=25482629</a>  6 Cell Adh Migr 9 3  2015 Journal Article,Research Support, U.S. Gov't, Non-P.H.S.                                                                                                                                                                                                                                                                                                                                                                                                                                                                                                                                                                                                                                                                                                                                                                                                                                                                                                                                                                                                                                                                                                                                                                                                                                                                                                                                               |
| mapk14  | atf2    | <a href="http://www.ncbi.nlm.nih.gov/entrez/query.fcgi?cmd=Retrieve&amp;db=pubmed&amp;dopt=Abstract&amp;list_uids=25482629">http://www.ncbi.nlm.nih.gov/entrez/query.fcgi?cmd=Retrieve&amp;db=pubmed&amp;dopt=Abstract&amp;list_uids=25482629</a>  6 Cell Adh Migr 9 3  2015 Journal Article,Research Support, U.S. Gov't, Non-P.H.S.                                                                                                                                                                                                                                                                                                                                                                                                                                                                                                                                                                                                                                                                                                                                                                                                                                                                                                                                                                                                                                                                                                                                                                                                                                                                                                                                               |
| mapk14  | ipp     | <a href="http://www.ncbi.nlm.nih.gov/entrez/query.fcgi?cmd=Retrieve&amp;db=pubmed&amp;dopt=Abstract&amp;list_uids=25482629">http://www.ncbi.nlm.nih.gov/entrez/query.fcgi?cmd=Retrieve&amp;db=pubmed&amp;dopt=Abstract&amp;list_uids=25482629</a>  6 Cell Adh Migr 9 3  2015 Journal Article,Research Support, U.S. Gov't, Non-P.H.S.                                                                                                                                                                                                                                                                                                                                                                                                                                                                                                                                                                                                                                                                                                                                                                                                                                                                                                                                                                                                                                                                                                                                                                                                                                                                                                                                               |
| atf2    | ipp     | <a href="http://www.ncbi.nlm.nih.gov/entrez/query.fcgi?cmd=Retrieve&amp;db=pubmed&amp;dopt=Abstract&amp;list_uids=25482629">http://www.ncbi.nlm.nih.gov/entrez/query.fcgi?cmd=Retrieve&amp;db=pubmed&amp;dopt=Abstract&amp;list_uids=25482629</a>  6 Cell Adh Migr 9 3  2015 Journal Article,Research Support, U.S. Gov't, Non-P.H.S.                                                                                                                                                                                                                                                                                                                                                                                                                                                                                                                                                                                                                                                                                                                                                                                                                                                                                                                                                                                                                                                                                                                                                                                                                                                                                                                                               |
| fas     | ipp     | <a href="http://www.ncbi.nlm.nih.gov/entrez/query.fcgi?cmd=Retrieve&amp;db=pubmed&amp;dopt=Abstract&amp;list_uids=25482629">http://www.ncbi.nlm.nih.gov/entrez/query.fcgi?cmd=Retrieve&amp;db=pubmed&amp;dopt=Abstract&amp;list_uids=25482629</a>  6 Cell Adh Migr 9 3  2015 Journal Article,Research Support, U.S. Gov't, Non-P.H.S.                                                                                                                                                                                                                                                                                                                                                                                                                                                                                                                                                                                                                                                                                                                                                                                                                                                                                                                                                                                                                                                                                                                                                                                                                                                                                                                                               |
| fas     | egf     | <a href="http://www.ncbi.nlm.nih.gov/entrez/query.fcgi?cmd=Retrieve&amp;db=pubmed&amp;dopt=Abstract&amp;list_uids=25482629">http://www.ncbi.nlm.nih.gov/entrez/query.fcgi?cmd=Retrieve&amp;db=pubmed&amp;dopt=Abstract&amp;list_uids=25482629</a>  6 Cell Adh Migr 9 3  2015 Journal Article,Research Support, U.S. Gov't, Non-P.H.S.                                                                                                                                                                                                                                                                                                                                                                                                                                                                                                                                                                                                                                                                                                                                                                                                                                                                                                                                                                                                                                                                                                                                                                                                                                                                                                                                               |
| fas     | mapk14  | <a href="http://www.ncbi.nlm.nih.gov/entrez/query.fcgi?cmd=Retrieve&amp;db=pubmed&amp;dopt=Abstract&amp;list_uids=25482629">http://www.ncbi.nlm.nih.gov/entrez/query.fcgi?cmd=Retrieve&amp;db=pubmed&amp;dopt=Abstract&amp;list_uids=25482629</a>  6 Cell Adh Migr 9 3  2015 Journal Article,Research Support, U.S. Gov't, Non-P.H.S.                                                                                                                                                                                                                                                                                                                                                                                                                                                                                                                                                                                                                                                                                                                                                                                                                                                                                                                                                                                                                                                                                                                                                                                                                                                                                                                                               |
| racgap1 | rhoa    | <a href="http://www.ncbi.nlm.nih.gov/entrez/query.fcgi?cmd=Retrieve&amp;db=pubmed&amp;dopt=Abstract&amp;list_uids=25475728">http://www.ncbi.nlm.nih.gov/entrez/query.fcgi?cmd=Retrieve&amp;db=pubmed&amp;dopt=Abstract&amp;list_uids=25475728</a>  6 Biochem Biophys Res Commun 459 1 Mar 2015 Journal Article,Research Support, Non-U.S. Gov't                                                                                                                                                                                                                                                                                                                                                                                                                                                                                                                                                                                                                                                                                                                                                                                                                                                                                                                                                                                                                                                                                                                                                                                                                                                                                                                                     |
| racgap1 | ptk2    | <a href="http://www.ncbi.nlm.nih.gov/entrez/query.fcgi?cmd=Retrieve&amp;db=pubmed&amp;dopt=Abstract&amp;list_uids=25475728">http://www.ncbi.nlm.nih.gov/entrez/query.fcgi?cmd=Retrieve&amp;db=pubmed&amp;dopt=Abstract&amp;list_uids=25475728</a>  6 Biochem Biophys Res Commun 459 1 Mar 2015 Journal Article,Research Support, Non-U.S. Gov't                                                                                                                                                                                                                                                                                                                                                                                                                                                                                                                                                                                                                                                                                                                                                                                                                                                                                                                                                                                                                                                                                                                                                                                                                                                                                                                                     |
|         |         | <a href="http://www.ncbi.nlm.nih.gov/entrez/query.fcgi?cmd=Retrieve&amp;db=pubmed&amp;dopt=Abstract&amp;list_uids=22513979">http://www.ncbi.nlm.nih.gov/entrez/query.fcgi?cmd=Retrieve&amp;db=pubmed&amp;dopt=Abstract&amp;list_uids=22513979</a>  6 J Pathol 228 1 Sep 2012 Journal Article,Research Support, Non-U.S. Gov't  <a href="http://www.ncbi.nlm.nih.gov/entrez/query.fcgi?cmd=Retrieve&amp;db=pubmed&amp;dopt=Abstract&amp;list_uids=25471072">http://www.ncbi.nlm.nih.gov/entrez/query.fcgi?cmd=Retrieve&amp;db=pubmed&amp;dopt=Abstract&amp;list_uids=25471072</a>  6 EMBO J 34 4 Feb 2015 Journal Article,Research Support, Non-U.S. Gov't  <a href="http://www.ncbi.nlm.nih.gov/entrez/query.fcgi?cmd=Retrieve&amp;db=pubmed&amp;dopt=Abstract&amp;list_uids=23836527">http://www.ncbi.nlm.nih.gov/entrez/query.fcgi?cmd=Retrieve&amp;db=pubmed&amp;dopt=Abstract&amp;list_uids=23836527</a>  6 Stem Cells 31 11 Nov 2013 Journal Article,Research Support, N.I.H., Extramural  <a href="http://www.ncbi.nlm.nih.gov/entrez/query.fcgi?cmd=Retrieve&amp;db=pubmed&amp;dopt=Abstract&amp;list_uids=25475728">http://www.ncbi.nlm.nih.gov/entrez/query.fcgi?cmd=Retrieve&amp;db=pubmed&amp;dopt=Abstract&amp;list_uids=25475728</a>  6 Biochem Biophys Res Commun 459 1 Mar 2015 Journal Article,Research Support, Non-U.S. Gov't  <a href="http://www.ncbi.nlm.nih.gov/entrez/query.fcgi?cmd=Retrieve&amp;db=pubmed&amp;dopt=Abstract&amp;list_uids=22721990">http://www.ncbi.nlm.nih.gov/entrez/query.fcgi?cmd=Retrieve&amp;db=pubmed&amp;dopt=Abstract&amp;list_uids=22721990</a>  6 Cardiovasc Res 95 3 Aug 2012 Journal Article,Research Support, Non-U.S. Gov't |
| rhoa    | ptk2    | <a href="http://www.ncbi.nlm.nih.gov/entrez/query.fcgi?cmd=Retrieve&amp;db=pubmed&amp;dopt=Abstract&amp;list_uids=25475728">http://www.ncbi.nlm.nih.gov/entrez/query.fcgi?cmd=Retrieve&amp;db=pubmed&amp;dopt=Abstract&amp;list_uids=25475728</a>  6 Biochem Biophys Res Commun 459 1 Mar 2015 Journal Article,Research Support, Non-U.S. Gov't                                                                                                                                                                                                                                                                                                                                                                                                                                                                                                                                                                                                                                                                                                                                                                                                                                                                                                                                                                                                                                                                                                                                                                                                                                                                                                                                     |
| ptk2b   | racgap1 | <a href="http://www.ncbi.nlm.nih.gov/entrez/query.fcgi?cmd=Retrieve&amp;db=pubmed&amp;dopt=Abstract&amp;list_uids=25475728">http://www.ncbi.nlm.nih.gov/entrez/query.fcgi?cmd=Retrieve&amp;db=pubmed&amp;dopt=Abstract&amp;list_uids=25475728</a>  6 Biochem Biophys Res Commun 459 1 Mar 2015 Journal Article,Research Support, Non-U.S. Gov't                                                                                                                                                                                                                                                                                                                                                                                                                                                                                                                                                                                                                                                                                                                                                                                                                                                                                                                                                                                                                                                                                                                                                                                                                                                                                                                                     |
| crk     | pik3r1  | <a href="http://www.ncbi.nlm.nih.gov/entrez/query.fcgi?cmd=Retrieve&amp;db=pubmed&amp;dopt=Abstract&amp;list_uids=25471072">http://www.ncbi.nlm.nih.gov/entrez/query.fcgi?cmd=Retrieve&amp;db=pubmed&amp;dopt=Abstract&amp;list_uids=25471072</a>  6 EMBO J 34 4 Feb 2015 Journal Article,Research Support, Non-U.S. Gov't                                                                                                                                                                                                                                                                                                                                                                                                                                                                                                                                                                                                                                                                                                                                                                                                                                                                                                                                                                                                                                                                                                                                                                                                                                                                                                                                                          |

|         |        |                                                                                                                                                                                                                                                                                                                                                                                                                                                                                                                                                                                                                                                                                                                                                                                                                                                                                                                                                                                                                                                                |
|---------|--------|----------------------------------------------------------------------------------------------------------------------------------------------------------------------------------------------------------------------------------------------------------------------------------------------------------------------------------------------------------------------------------------------------------------------------------------------------------------------------------------------------------------------------------------------------------------------------------------------------------------------------------------------------------------------------------------------------------------------------------------------------------------------------------------------------------------------------------------------------------------------------------------------------------------------------------------------------------------------------------------------------------------------------------------------------------------|
| ptk2    | myh14  | <a href="http://www.ncbi.nlm.nih.gov/entrez/query.fcgi?cmd=Retrieve&amp;db=pubmed&amp;dopt=Abstract&amp;list_uids=22915102">http://www.ncbi.nlm.nih.gov/entrez/query.fcgi?cmd=Retrieve&amp;db=pubmed&amp;dopt=Abstract&amp;list_uids=22915102</a>  6 J Neurosci 32 34 Aug 2012 Journal Article,Research Support, N.I.H., Extramural,Research Support, Non-U.S. Gov't,Validation Studies  <a href="http://www.ncbi.nlm.nih.gov/entrez/query.fcgi?cmd=Retrieve&amp;db=pubmed&amp;dopt=Abstract&amp;list_uids=25471072">http://www.ncbi.nlm.nih.gov/entrez/query.fcgi?cmd=Retrieve&amp;db=pubmed&amp;dopt=Abstract&amp;list_uids=25471072</a>  6 E MBO J 34 4 Feb 2015 Journal Article,Research Support, Non-U.S. Gov't  <a href="http://www.ncbi.nlm.nih.gov/entrez/query.fcgi?cmd=Retrieve&amp;db=pubmed&amp;dopt=Abstract&amp;list_uids=23600470">http://www.ncbi.nlm.nih.gov/entrez/query.fcgi?cmd=Retrieve&amp;db=pubmed&amp;dopt=Abstract&amp;list_uids=23600470</a>  6 Microcirculation 20 7 Oct 2013 Journal Article,Research Support, N.I.H., Extramural |
| depdc1b | rhoa   | <a href="http://www.ncbi.nlm.nih.gov/entrez/query.fcgi?cmd=Retrieve&amp;db=pubmed&amp;dopt=Abstract&amp;list_uids=25458010">http://www.ncbi.nlm.nih.gov/entrez/query.fcgi?cmd=Retrieve&amp;db=pubmed&amp;dopt=Abstract&amp;list_uids=25458010</a>  6 Dev Cell 31 4 Nov 2014 Journal Article,Research Support, Non-U.S. Gov't                                                                                                                                                                                                                                                                                                                                                                                                                                                                                                                                                                                                                                                                                                                                   |
| depdc1b | ptprf  | <a href="http://www.ncbi.nlm.nih.gov/entrez/query.fcgi?cmd=Retrieve&amp;db=pubmed&amp;dopt=Abstract&amp;list_uids=25458010">http://www.ncbi.nlm.nih.gov/entrez/query.fcgi?cmd=Retrieve&amp;db=pubmed&amp;dopt=Abstract&amp;list_uids=25458010</a>  6 Dev Cell 31 4 Nov 2014 Journal Article,Research Support, Non-U.S. Gov't                                                                                                                                                                                                                                                                                                                                                                                                                                                                                                                                                                                                                                                                                                                                   |
| depdc1b | fas    | <a href="http://www.ncbi.nlm.nih.gov/entrez/query.fcgi?cmd=Retrieve&amp;db=pubmed&amp;dopt=Abstract&amp;list_uids=25458010">http://www.ncbi.nlm.nih.gov/entrez/query.fcgi?cmd=Retrieve&amp;db=pubmed&amp;dopt=Abstract&amp;list_uids=25458010</a>  6 Dev Cell 31 4 Nov 2014 Journal Article,Research Support, Non-U.S. Gov't                                                                                                                                                                                                                                                                                                                                                                                                                                                                                                                                                                                                                                                                                                                                   |
| rhoa    | ptprf  | <a href="http://www.ncbi.nlm.nih.gov/entrez/query.fcgi?cmd=Retrieve&amp;db=pubmed&amp;dopt=Abstract&amp;list_uids=25458010">http://www.ncbi.nlm.nih.gov/entrez/query.fcgi?cmd=Retrieve&amp;db=pubmed&amp;dopt=Abstract&amp;list_uids=25458010</a>  6 Dev Cell 31 4 Nov 2014 Journal Article,Research Support, Non-U.S. Gov't                                                                                                                                                                                                                                                                                                                                                                                                                                                                                                                                                                                                                                                                                                                                   |
| rhoa    | fas    | <a href="http://www.ncbi.nlm.nih.gov/entrez/query.fcgi?cmd=Retrieve&amp;db=pubmed&amp;dopt=Abstract&amp;list_uids=25458010">http://www.ncbi.nlm.nih.gov/entrez/query.fcgi?cmd=Retrieve&amp;db=pubmed&amp;dopt=Abstract&amp;list_uids=25458010</a>  6 Dev Cell 31 4 Nov 2014 Journal Article,Research Support, Non-U.S. Gov't  <a href="http://www.ncbi.nlm.nih.gov/entrez/query.fcgi?cmd=Retrieve&amp;db=pubmed&amp;dopt=Abstract&amp;list_uids=23344455">http://www.ncbi.nlm.nih.gov/entrez/query.fcgi?cmd=Retrieve&amp;db=pubmed&amp;dopt=Abstract&amp;list_uids=23344455</a>  6 Toxins (Basel) 5 1 Jan 2013 Comparative Study,Journal Article,Research Support, Non-U.S. Gov't                                                                                                                                                                                                                                                                                                                                                                              |
| ptprf   | fas    | <a href="http://www.ncbi.nlm.nih.gov/entrez/query.fcgi?cmd=Retrieve&amp;db=pubmed&amp;dopt=Abstract&amp;list_uids=25458010">http://www.ncbi.nlm.nih.gov/entrez/query.fcgi?cmd=Retrieve&amp;db=pubmed&amp;dopt=Abstract&amp;list_uids=25458010</a>  6 Dev Cell 31 4 Nov 2014 Journal Article,Research Support, Non-U.S. Gov't                                                                                                                                                                                                                                                                                                                                                                                                                                                                                                                                                                                                                                                                                                                                   |
| cdk5    | dlc1   | <a href="http://www.ncbi.nlm.nih.gov/entrez/query.fcgi?cmd=Retrieve&amp;db=pubmed&amp;dopt=Abstract&amp;list_uids=25452387">http://www.ncbi.nlm.nih.gov/entrez/query.fcgi?cmd=Retrieve&amp;db=pubmed&amp;dopt=Abstract&amp;list_uids=25452387</a>  6 J Cell Biol 207 5 Dec 2014 Journal Article,Research Support, N.I.H., Intramural                                                                                                                                                                                                                                                                                                                                                                                                                                                                                                                                                                                                                                                                                                                           |
| lpa     | src    | <a href="http://www.ncbi.nlm.nih.gov/entrez/query.fcgi?cmd=Retrieve&amp;db=pubmed&amp;dopt=Abstract&amp;list_uids=25451317">http://www.ncbi.nlm.nih.gov/entrez/query.fcgi?cmd=Retrieve&amp;db=pubmed&amp;dopt=Abstract&amp;list_uids=25451317</a>  6 Cancer Lett 356 2 Pt B Jan 2015 Journal Article,Research Support, N.I.H., Extramural                                                                                                                                                                                                                                                                                                                                                                                                                                                                                                                                                                                                                                                                                                                      |
| rac1    | bcar1  | <a href="http://www.ncbi.nlm.nih.gov/entrez/query.fcgi?cmd=Retrieve&amp;db=pubmed&amp;dopt=Abstract&amp;list_uids=25451317">http://www.ncbi.nlm.nih.gov/entrez/query.fcgi?cmd=Retrieve&amp;db=pubmed&amp;dopt=Abstract&amp;list_uids=25451317</a>  6 Cancer Lett 356 2 Pt B Jan 2015 Journal Article,Research Support, N.I.H., Extramural  <a href="http://www.ncbi.nlm.nih.gov/entrez/query.fcgi?cmd=Retrieve&amp;db=pubmed&amp;dopt=Abstract&amp;list_uids=24480309">http://www.ncbi.nlm.nih.gov/entrez/query.fcgi?cmd=Retrieve&amp;db=pubmed&amp;dopt=Abstract&amp;list_uids=24480309</a>  6 Arch Biochem Biophys 545  Mar 2014 Journal Article,Research Support, Non-U.S. Gov't                                                                                                                                                                                                                                                                                                                                                                            |
| tmlhe   | pry    | <a href="http://www.ncbi.nlm.nih.gov/entrez/query.fcgi?cmd=Retrieve&amp;db=pubmed&amp;dopt=Abstract&amp;list_uids=25450970">http://www.ncbi.nlm.nih.gov/entrez/query.fcgi?cmd=Retrieve&amp;db=pubmed&amp;dopt=Abstract&amp;list_uids=25450970</a>  6 Biochim Biophys Acta 1853 2 Feb 2015 Journal Article,Research Support, Non-U.S. Gov't                                                                                                                                                                                                                                                                                                                                                                                                                                                                                                                                                                                                                                                                                                                     |
| tmlhe   | trim15 | <a href="http://www.ncbi.nlm.nih.gov/entrez/query.fcgi?cmd=Retrieve&amp;db=pubmed&amp;dopt=Abstract&amp;list_uids=25450970">http://www.ncbi.nlm.nih.gov/entrez/query.fcgi?cmd=Retrieve&amp;db=pubmed&amp;dopt=Abstract&amp;list_uids=25450970</a>  6 Biochim Biophys Acta 1853 2 Feb 2015 Journal Article,Research Support, Non-U.S. Gov't                                                                                                                                                                                                                                                                                                                                                                                                                                                                                                                                                                                                                                                                                                                     |
| pry     | trim15 | <a href="http://www.ncbi.nlm.nih.gov/entrez/query.fcgi?cmd=Retrieve&amp;db=pubmed&amp;dopt=Abstract&amp;list_uids=25450970">http://www.ncbi.nlm.nih.gov/entrez/query.fcgi?cmd=Retrieve&amp;db=pubmed&amp;dopt=Abstract&amp;list_uids=25450970</a>  6 Biochim Biophys Acta 1853 2 Feb 2015 Journal Article,Research Support, Non-U.S. Gov't                                                                                                                                                                                                                                                                                                                                                                                                                                                                                                                                                                                                                                                                                                                     |
| trim15  | pdlim5 | <a href="http://www.ncbi.nlm.nih.gov/entrez/query.fcgi?cmd=Retrieve&amp;db=pubmed&amp;dopt=Abstract&amp;list_uids=25450970">http://www.ncbi.nlm.nih.gov/entrez/query.fcgi?cmd=Retrieve&amp;db=pubmed&amp;dopt=Abstract&amp;list_uids=25450970</a>  6 Biochim Biophys Acta 1853 2 Feb 2015 Journal Article,Research Support, Non-U.S. Gov't                                                                                                                                                                                                                                                                                                                                                                                                                                                                                                                                                                                                                                                                                                                     |

|        |       |                                                                                                                                                                                                                                                                                                                                                                                                                                                                                                                                                                                                                                                                                                                                                                                                                                                                                                                                                                                                                                                                        |
|--------|-------|------------------------------------------------------------------------------------------------------------------------------------------------------------------------------------------------------------------------------------------------------------------------------------------------------------------------------------------------------------------------------------------------------------------------------------------------------------------------------------------------------------------------------------------------------------------------------------------------------------------------------------------------------------------------------------------------------------------------------------------------------------------------------------------------------------------------------------------------------------------------------------------------------------------------------------------------------------------------------------------------------------------------------------------------------------------------|
| trim15 | actin | <a href="http://www.ncbi.nlm.nih.gov/entrez/query.fcgi?cmd=Retrieve&amp;db=pubmed&amp;dopt=Abstract&amp;list_uids=25450970">http://www.ncbi.nlm.nih.gov/entrez/query.fcgi?cmd=Retrieve&amp;db=pubmed&amp;dopt=Abstract&amp;list_uids=25450970</a>  6 Biochim Biophys Acta 1853 2 Feb 2015 Journal Article,Research Support, Non-U.S. Gov't                                                                                                                                                                                                                                                                                                                                                                                                                                                                                                                                                                                                                                                                                                                             |
| pdlim5 | actin | <a href="http://www.ncbi.nlm.nih.gov/entrez/query.fcgi?cmd=Retrieve&amp;db=pubmed&amp;dopt=Abstract&amp;list_uids=24165133">http://www.ncbi.nlm.nih.gov/entrez/query.fcgi?cmd=Retrieve&amp;db=pubmed&amp;dopt=Abstract&amp;list_uids=24165133</a>  6 J Biol Chem 288 49 Dec 2013 Journal Article,Research Support, N.I.H., Extramural,Research Support, Non-U.S. Gov't  <a href="http://www.ncbi.nlm.nih.gov/entrez/query.fcgi?cmd=Retrieve&amp;db=pubmed&amp;dopt=Abstract&amp;list_uids=23974244">http://www.ncbi.nlm.nih.gov/entrez/query.fcgi?cmd=Retrieve&amp;db=pubmed&amp;dopt=Abstract&amp;list_uids=23974244</a>  6 Cell Mol Life Sci 71 10 May 2014 Journal Article,Research Support, Non-U.S. Gov't  <a href="http://www.ncbi.nlm.nih.gov/entrez/query.fcgi?cmd=Retrieve&amp;db=pubmed&amp;dopt=Abstract&amp;list_uids=25450970">http://www.ncbi.nlm.nih.gov/entrez/query.fcgi?cmd=Retrieve&amp;db=pubmed&amp;dopt=Abstract&amp;list_uids=25450970</a>  6 Biochim Biophys Acta 1853 2 Feb 2015 Journal Article,Research Support, Non-U.S. Gov't             |
| dlc1   | fas   | <a href="http://www.ncbi.nlm.nih.gov/entrez/query.fcgi?cmd=Retrieve&amp;db=pubmed&amp;dopt=Abstract&amp;list_uids=25448629">http://www.ncbi.nlm.nih.gov/entrez/query.fcgi?cmd=Retrieve&amp;db=pubmed&amp;dopt=Abstract&amp;list_uids=25448629</a>  6 Cytoskeleton (Hoboken) 71 12 Dec 2014 Journal Article,Research Support, Non-U.S. Gov't                                                                                                                                                                                                                                                                                                                                                                                                                                                                                                                                                                                                                                                                                                                            |
| fas    | hgf   | <a href="http://www.ncbi.nlm.nih.gov/entrez/query.fcgi?cmd=Retrieve&amp;db=pubmed&amp;dopt=Abstract&amp;list_uids=25447308">http://www.ncbi.nlm.nih.gov/entrez/query.fcgi?cmd=Retrieve&amp;db=pubmed&amp;dopt=Abstract&amp;list_uids=25447308</a>  6 Exp Cell Res 330 2 Jan 2015 Journal Article,Research Support, Non-U.S. Gov't                                                                                                                                                                                                                                                                                                                                                                                                                                                                                                                                                                                                                                                                                                                                      |
| fas    | rap1a | <a href="http://www.ncbi.nlm.nih.gov/entrez/query.fcgi?cmd=Retrieve&amp;db=pubmed&amp;dopt=Abstract&amp;list_uids=25447308">http://www.ncbi.nlm.nih.gov/entrez/query.fcgi?cmd=Retrieve&amp;db=pubmed&amp;dopt=Abstract&amp;list_uids=25447308</a>  6 Exp Cell Res 330 2 Jan 2015 Journal Article,Research Support, Non-U.S. Gov't                                                                                                                                                                                                                                                                                                                                                                                                                                                                                                                                                                                                                                                                                                                                      |
| hgf    | rap1a | <a href="http://www.ncbi.nlm.nih.gov/entrez/query.fcgi?cmd=Retrieve&amp;db=pubmed&amp;dopt=Abstract&amp;list_uids=25447308">http://www.ncbi.nlm.nih.gov/entrez/query.fcgi?cmd=Retrieve&amp;db=pubmed&amp;dopt=Abstract&amp;list_uids=25447308</a>  6 Exp Cell Res 330 2 Jan 2015 Journal Article,Research Support, Non-U.S. Gov't                                                                                                                                                                                                                                                                                                                                                                                                                                                                                                                                                                                                                                                                                                                                      |
| fat    | fas   | <a href="http://www.ncbi.nlm.nih.gov/entrez/query.fcgi?cmd=Retrieve&amp;db=pubmed&amp;dopt=Abstract&amp;list_uids=25391654">http://www.ncbi.nlm.nih.gov/entrez/query.fcgi?cmd=Retrieve&amp;db=pubmed&amp;dopt=Abstract&amp;list_uids=25391654</a>  6 J Biol Chem 290 1 Jan 2015 Journal Article,Research Support, Non-U.S. Gov't                                                                                                                                                                                                                                                                                                                                                                                                                                                                                                                                                                                                                                                                                                                                       |
| fat    | tyr   | <a href="http://www.ncbi.nlm.nih.gov/entrez/query.fcgi?cmd=Retrieve&amp;db=pubmed&amp;dopt=Abstract&amp;list_uids=25391654">http://www.ncbi.nlm.nih.gov/entrez/query.fcgi?cmd=Retrieve&amp;db=pubmed&amp;dopt=Abstract&amp;list_uids=25391654</a>  6 J Biol Chem 290 1 Jan 2015 Journal Article,Research Support, Non-U.S. Gov't                                                                                                                                                                                                                                                                                                                                                                                                                                                                                                                                                                                                                                                                                                                                       |
| fat    | grb2  | <a href="http://www.ncbi.nlm.nih.gov/entrez/query.fcgi?cmd=Retrieve&amp;db=pubmed&amp;dopt=Abstract&amp;list_uids=25391654">http://www.ncbi.nlm.nih.gov/entrez/query.fcgi?cmd=Retrieve&amp;db=pubmed&amp;dopt=Abstract&amp;list_uids=25391654</a>  6 J Biol Chem 290 1 Jan 2015 Journal Article,Research Support, Non-U.S. Gov't                                                                                                                                                                                                                                                                                                                                                                                                                                                                                                                                                                                                                                                                                                                                       |
| tyr    | grb2  | <a href="http://www.ncbi.nlm.nih.gov/entrez/query.fcgi?cmd=Retrieve&amp;db=pubmed&amp;dopt=Abstract&amp;list_uids=25391654">http://www.ncbi.nlm.nih.gov/entrez/query.fcgi?cmd=Retrieve&amp;db=pubmed&amp;dopt=Abstract&amp;list_uids=25391654</a>  6 J Biol Chem 290 1 Jan 2015 Journal Article,Research Support, Non-U.S. Gov't                                                                                                                                                                                                                                                                                                                                                                                                                                                                                                                                                                                                                                                                                                                                       |
| ptk2   | tyr   | <a href="http://www.ncbi.nlm.nih.gov/entrez/query.fcgi?cmd=Retrieve&amp;db=pubmed&amp;dopt=Abstract&amp;list_uids=25391654">http://www.ncbi.nlm.nih.gov/entrez/query.fcgi?cmd=Retrieve&amp;db=pubmed&amp;dopt=Abstract&amp;list_uids=25391654</a>  6 J Biol Chem 290 1 Jan 2015 Journal Article,Research Support, Non-U.S. Gov't  <a href="http://www.ncbi.nlm.nih.gov/entrez/query.fcgi?cmd=Retrieve&amp;db=pubmed&amp;dopt=Abstract&amp;list_uids=23637231">http://www.ncbi.nlm.nih.gov/entrez/query.fcgi?cmd=Retrieve&amp;db=pubmed&amp;dopt=Abstract&amp;list_uids=23637231</a>  6 J Biol Chem 288 24 Jun 2013 Journal Article,Research Support, N.I.H., Extramural,Research Support, Non-U.S. Gov't  <a href="http://www.ncbi.nlm.nih.gov/entrez/query.fcgi?cmd=Retrieve&amp;db=pubmed&amp;dopt=Abstract&amp;list_uids=24586773">http://www.ncbi.nlm.nih.gov/entrez/query.fcgi?cmd=Retrieve&amp;db=pubmed&amp;dopt=Abstract&amp;list_uids=24586773</a>  6 PLoS One 9 2 2014 Journal Article,Research Support, N.I.H., Extramural,Research Support, Non-U.S. Gov't |
| ephb2  | fat   | <a href="http://www.ncbi.nlm.nih.gov/entrez/query.fcgi?cmd=Retrieve&amp;db=pubmed&amp;dopt=Abstract&amp;list_uids=25391654">http://www.ncbi.nlm.nih.gov/entrez/query.fcgi?cmd=Retrieve&amp;db=pubmed&amp;dopt=Abstract&amp;list_uids=25391654</a>  6 J Biol Chem 290 1 Jan 2015 Journal Article,Research Support, Non-U.S. Gov't                                                                                                                                                                                                                                                                                                                                                                                                                                                                                                                                                                                                                                                                                                                                       |
| ate1   | actin | <a href="http://www.ncbi.nlm.nih.gov/entrez/query.fcgi?cmd=Retrieve&amp;db=pubmed&amp;dopt=Abstract&amp;list_uids=25381249">http://www.ncbi.nlm.nih.gov/entrez/query.fcgi?cmd=Retrieve&amp;db=pubmed&amp;dopt=Abstract&amp;list_uids=25381249</a>  6 J Biol Chem 289 51 Dec 2014 Journal Article,Research Support, Non-U.S. Gov't                                                                                                                                                                                                                                                                                                                                                                                                                                                                                                                                                                                                                                                                                                                                      |
| eps8   | src   | <a href="http://www.ncbi.nlm.nih.gov/entrez/query.fcgi?cmd=Retrieve&amp;db=pubmed&amp;dopt=Abstract&amp;list_uids=25359883">http://www.ncbi.nlm.nih.gov/entrez/query.fcgi?cmd=Retrieve&amp;db=pubmed&amp;dopt=Abstract&amp;list_uids=25359883</a>  6 J Cell Sci 127 Pt 24 Dec 2014 Journal Article,Research Support, Non-U.S. Gov't                                                                                                                                                                                                                                                                                                                                                                                                                                                                                                                                                                                                                                                                                                                                    |

|                |                |                                                                                                                                                                                                                                                                                                                                                                             |
|----------------|----------------|-----------------------------------------------------------------------------------------------------------------------------------------------------------------------------------------------------------------------------------------------------------------------------------------------------------------------------------------------------------------------------|
| eps8           | ptk2           | <a href="http://www.ncbi.nlm.nih.gov/entrez/query.fcgi?cmd=Retrieve&amp;db=pubmed&amp;dopt=Abstract&amp;list_uids=25359883">http://www.ncbi.nlm.nih.gov/entrez/query.fcgi?cmd=Retrieve&amp;db=pubmed&amp;dopt=Abstract&amp;list_uids=25359883</a>  6 J Cell Sci 127 Pt 24 Dec 2014 Journal Article,Research Support, Non-U.S. Gov't                                         |
| eps8           | actin          | <a href="http://www.ncbi.nlm.nih.gov/entrez/query.fcgi?cmd=Retrieve&amp;db=pubmed&amp;dopt=Abstract&amp;list_uids=25359883">http://www.ncbi.nlm.nih.gov/entrez/query.fcgi?cmd=Retrieve&amp;db=pubmed&amp;dopt=Abstract&amp;list_uids=25359883</a>  6 J Cell Sci 127 Pt 24 Dec 2014 Journal Article,Research Support, Non-U.S. Gov't                                         |
| cd4            | cd8a           | <a href="http://www.ncbi.nlm.nih.gov/entrez/query.fcgi?cmd=Retrieve&amp;db=pubmed&amp;dopt=Abstract&amp;list_uids=25310899">http://www.ncbi.nlm.nih.gov/entrez/query.fcgi?cmd=Retrieve&amp;db=pubmed&amp;dopt=Abstract&amp;list_uids=25310899</a>  6 Clin Exp Immunol 179 3 Mar 2015 Journal Article                                                                        |
| cd4            | 1.13.11<br>.17 | <a href="http://www.ncbi.nlm.nih.gov/entrez/query.fcgi?cmd=Retrieve&amp;db=pubmed&amp;dopt=Abstract&amp;list_uids=25310899">http://www.ncbi.nlm.nih.gov/entrez/query.fcgi?cmd=Retrieve&amp;db=pubmed&amp;dopt=Abstract&amp;list_uids=25310899</a>  6 Clin Exp Immunol 179 3 Mar 2015 Journal Article                                                                        |
| cd8a           | 1.13.11<br>.17 | <a href="http://www.ncbi.nlm.nih.gov/entrez/query.fcgi?cmd=Retrieve&amp;db=pubmed&amp;dopt=Abstract&amp;list_uids=25310899">http://www.ncbi.nlm.nih.gov/entrez/query.fcgi?cmd=Retrieve&amp;db=pubmed&amp;dopt=Abstract&amp;list_uids=25310899</a>  6 Clin Exp Immunol 179 3 Mar 2015 Journal Article                                                                        |
| 1.13.11<br>.17 | cd274          | <a href="http://www.ncbi.nlm.nih.gov/entrez/query.fcgi?cmd=Retrieve&amp;db=pubmed&amp;dopt=Abstract&amp;list_uids=25310899">http://www.ncbi.nlm.nih.gov/entrez/query.fcgi?cmd=Retrieve&amp;db=pubmed&amp;dopt=Abstract&amp;list_uids=25310899</a>  6 Clin Exp Immunol 179 3 Mar 2015 Journal Article                                                                        |
| 1.13.11<br>.17 | icam1          | <a href="http://www.ncbi.nlm.nih.gov/entrez/query.fcgi?cmd=Retrieve&amp;db=pubmed&amp;dopt=Abstract&amp;list_uids=25310899">http://www.ncbi.nlm.nih.gov/entrez/query.fcgi?cmd=Retrieve&amp;db=pubmed&amp;dopt=Abstract&amp;list_uids=25310899</a>  6 Clin Exp Immunol 179 3 Mar 2015 Journal Article                                                                        |
| cd274          | icam1          | <a href="http://www.ncbi.nlm.nih.gov/entrez/query.fcgi?cmd=Retrieve&amp;db=pubmed&amp;dopt=Abstract&amp;list_uids=25310899">http://www.ncbi.nlm.nih.gov/entrez/query.fcgi?cmd=Retrieve&amp;db=pubmed&amp;dopt=Abstract&amp;list_uids=25310899</a>  6 Clin Exp Immunol 179 3 Mar 2015 Journal Article                                                                        |
| nme1           | nme2           | <a href="http://www.ncbi.nlm.nih.gov/entrez/query.fcgi?cmd=Retrieve&amp;db=pubmed&amp;dopt=Abstract&amp;list_uids=25249619">http://www.ncbi.nlm.nih.gov/entrez/query.fcgi?cmd=Retrieve&amp;db=pubmed&amp;dopt=Abstract&amp;list_uids=25249619</a>  6 Nucleic Acids Res 42 18 Oct 2014 Journal Article,Research Support, N.I.H., Extramural,Research Support, Non-U.S. Gov't |
| snw1           | actin          | <a href="http://www.ncbi.nlm.nih.gov/entrez/query.fcgi?cmd=Retrieve&amp;db=pubmed&amp;dopt=Abstract&amp;list_uids=25241900">http://www.ncbi.nlm.nih.gov/entrez/query.fcgi?cmd=Retrieve&amp;db=pubmed&amp;dopt=Abstract&amp;list_uids=25241900</a>  6 Oncogene 34 28 Jul 2015 Journal Article,Research Support, Non-U.S. Gov't                                               |
| snw1           | pten           | <a href="http://www.ncbi.nlm.nih.gov/entrez/query.fcgi?cmd=Retrieve&amp;db=pubmed&amp;dopt=Abstract&amp;list_uids=25241900">http://www.ncbi.nlm.nih.gov/entrez/query.fcgi?cmd=Retrieve&amp;db=pubmed&amp;dopt=Abstract&amp;list_uids=25241900</a>  6 Oncogene 34 28 Jul 2015 Journal Article,Research Support, Non-U.S. Gov't                                               |
| cpeb4          | fbn1           | <a href="http://www.ncbi.nlm.nih.gov/entrez/query.fcgi?cmd=Retrieve&amp;db=pubmed&amp;dopt=Abstract&amp;list_uids=25237887">http://www.ncbi.nlm.nih.gov/entrez/query.fcgi?cmd=Retrieve&amp;db=pubmed&amp;dopt=Abstract&amp;list_uids=25237887</a>  6 PLoS One 9 9 2014 Journal Article,Research Support, Non-U.S. Gov't                                                     |
| jun            | cpeb4          | <a href="http://www.ncbi.nlm.nih.gov/entrez/query.fcgi?cmd=Retrieve&amp;db=pubmed&amp;dopt=Abstract&amp;list_uids=25237887">http://www.ncbi.nlm.nih.gov/entrez/query.fcgi?cmd=Retrieve&amp;db=pubmed&amp;dopt=Abstract&amp;list_uids=25237887</a>  6 PLoS One 9 9 2014 Journal Article,Research Support, Non-U.S. Gov't                                                     |
| jun            | sorbs3         | <a href="http://www.ncbi.nlm.nih.gov/entrez/query.fcgi?cmd=Retrieve&amp;db=pubmed&amp;dopt=Abstract&amp;list_uids=25237887">http://www.ncbi.nlm.nih.gov/entrez/query.fcgi?cmd=Retrieve&amp;db=pubmed&amp;dopt=Abstract&amp;list_uids=25237887</a>  6 PLoS One 9 9 2014 Journal Article,Research Support, Non-U.S. Gov't                                                     |
| mapk8          | cpeb4          | <a href="http://www.ncbi.nlm.nih.gov/entrez/query.fcgi?cmd=Retrieve&amp;db=pubmed&amp;dopt=Abstract&amp;list_uids=25237887">http://www.ncbi.nlm.nih.gov/entrez/query.fcgi?cmd=Retrieve&amp;db=pubmed&amp;dopt=Abstract&amp;list_uids=25237887</a>  6 PLoS One 9 9 2014 Journal Article,Research Support, Non-U.S. Gov't                                                     |
| mapk8          | sorbs3         | <a href="http://www.ncbi.nlm.nih.gov/entrez/query.fcgi?cmd=Retrieve&amp;db=pubmed&amp;dopt=Abstract&amp;list_uids=25237887">http://www.ncbi.nlm.nih.gov/entrez/query.fcgi?cmd=Retrieve&amp;db=pubmed&amp;dopt=Abstract&amp;list_uids=25237887</a>  6 PLoS One 9 9 2014 Journal Article,Research Support, Non-U.S. Gov't                                                     |
| cpeb4          | sorbs3         | <a href="http://www.ncbi.nlm.nih.gov/entrez/query.fcgi?cmd=Retrieve&amp;db=pubmed&amp;dopt=Abstract&amp;list_uids=25237887">http://www.ncbi.nlm.nih.gov/entrez/query.fcgi?cmd=Retrieve&amp;db=pubmed&amp;dopt=Abstract&amp;list_uids=25237887</a>  6 PLoS One 9 9 2014 Journal Article,Research Support, Non-U.S. Gov't                                                     |
| fat            | cish           | <a href="http://www.ncbi.nlm.nih.gov/entrez/query.fcgi?cmd=Retrieve&amp;db=pubmed&amp;dopt=Abstract&amp;list_uids=25226367">http://www.ncbi.nlm.nih.gov/entrez/query.fcgi?cmd=Retrieve&amp;db=pubmed&amp;dopt=Abstract&amp;list_uids=25226367</a>  6 PLoS One 9 9 2014 Journal Article,Research Support, Non-U.S. Gov't                                                     |

[illegible]

|        |        |                                                                                                                                                                                                                                                                                                                                                                                                                                                                                                                                                                                                                                                                             |
|--------|--------|-----------------------------------------------------------------------------------------------------------------------------------------------------------------------------------------------------------------------------------------------------------------------------------------------------------------------------------------------------------------------------------------------------------------------------------------------------------------------------------------------------------------------------------------------------------------------------------------------------------------------------------------------------------------------------|
| arap2  | fas    | <a href="http://www.ncbi.nlm.nih.gov/entrez/query.fcgi?cmd=Retrieve&amp;db=pubmed&amp;dopt=Abstract&amp;list_uids=25225293">http://www.ncbi.nlm.nih.gov/entrez/query.fcgi?cmd=Retrieve&amp;db=pubmed&amp;dopt=Abstract&amp;list_uids=25225293</a>  6 J Biol Chem 289 44 Oct 2014 Journal Article,Research Support, N.I.H., Intramural  <a href="http://www.ncbi.nlm.nih.gov/entrez/query.fcgi?cmd=Retrieve&amp;db=pubmed&amp;dopt=Abstract&amp;list_uids=23295182">http://www.ncbi.nlm.nih.gov/entrez/query.fcgi?cmd=Retrieve&amp;db=pubmed&amp;dopt=Abstract&amp;list_uids=23295182</a>  6 J Biol Chem 288 8 Feb 2013 Journal Article,Research Support, N.I.H., Intramural |
| fas    | acap1  | <a href="http://www.ncbi.nlm.nih.gov/entrez/query.fcgi?cmd=Retrieve&amp;db=pubmed&amp;dopt=Abstract&amp;list_uids=25225293">http://www.ncbi.nlm.nih.gov/entrez/query.fcgi?cmd=Retrieve&amp;db=pubmed&amp;dopt=Abstract&amp;list_uids=25225293</a>  6 J Biol Chem 289 44 Oct 2014 Journal Article,Research Support, N.I.H., Intramural                                                                                                                                                                                                                                                                                                                                       |
| map3k2 | mapk8  | <a href="http://www.ncbi.nlm.nih.gov/entrez/query.fcgi?cmd=Retrieve&amp;db=pubmed&amp;dopt=Abstract&amp;list_uids=25190348">http://www.ncbi.nlm.nih.gov/entrez/query.fcgi?cmd=Retrieve&amp;db=pubmed&amp;dopt=Abstract&amp;list_uids=25190348</a>  6 Biochem J 464 1 Nov 2014 Journal Article,Research Support, N.I.H., Extramural,Research Support, Non-U.S. Gov't                                                                                                                                                                                                                                                                                                         |
| map3k2 | jun    | <a href="http://www.ncbi.nlm.nih.gov/entrez/query.fcgi?cmd=Retrieve&amp;db=pubmed&amp;dopt=Abstract&amp;list_uids=25190348">http://www.ncbi.nlm.nih.gov/entrez/query.fcgi?cmd=Retrieve&amp;db=pubmed&amp;dopt=Abstract&amp;list_uids=25190348</a>  6 Biochem J 464 1 Nov 2014 Journal Article,Research Support, N.I.H., Extramural,Research Support, Non-U.S. Gov't                                                                                                                                                                                                                                                                                                         |
| mmrn1  | pik3ca | <a href="http://www.ncbi.nlm.nih.gov/entrez/query.fcgi?cmd=Retrieve&amp;db=pubmed&amp;dopt=Abstract&amp;list_uids=25183785">http://www.ncbi.nlm.nih.gov/entrez/query.fcgi?cmd=Retrieve&amp;db=pubmed&amp;dopt=Abstract&amp;list_uids=25183785</a>  6 Cancer Res 74 17 Sep 2014 Journal Article,Research Support, N.I.H., Extramural,Research Support, Non-U.S. Gov't,Research Support, U.S. Gov't, P.H.S.                                                                                                                                                                                                                                                                   |
| mmrn1  | akt1   | <a href="http://www.ncbi.nlm.nih.gov/entrez/query.fcgi?cmd=Retrieve&amp;db=pubmed&amp;dopt=Abstract&amp;list_uids=25183785">http://www.ncbi.nlm.nih.gov/entrez/query.fcgi?cmd=Retrieve&amp;db=pubmed&amp;dopt=Abstract&amp;list_uids=25183785</a>  6 Cancer Res 74 17 Sep 2014 Journal Article,Research Support, N.I.H., Extramural,Research Support, Non-U.S. Gov't,Research Support, U.S. Gov't, P.H.S.                                                                                                                                                                                                                                                                   |
| akt1   | pten   | <a href="http://www.ncbi.nlm.nih.gov/entrez/query.fcgi?cmd=Retrieve&amp;db=pubmed&amp;dopt=Abstract&amp;list_uids=25142071">http://www.ncbi.nlm.nih.gov/entrez/query.fcgi?cmd=Retrieve&amp;db=pubmed&amp;dopt=Abstract&amp;list_uids=25142071</a>  6 Metallomics 6 12 Dec 2014 Journal Article,Research Support, Non-U.S. Gov't                                                                                                                                                                                                                                                                                                                                             |
| akt1   | mirn21 | <a href="http://www.ncbi.nlm.nih.gov/entrez/query.fcgi?cmd=Retrieve&amp;db=pubmed&amp;dopt=Abstract&amp;list_uids=25142071">http://www.ncbi.nlm.nih.gov/entrez/query.fcgi?cmd=Retrieve&amp;db=pubmed&amp;dopt=Abstract&amp;list_uids=25142071</a>  6 Metallomics 6 12 Dec 2014 Journal Article,Research Support, Non-U.S. Gov't                                                                                                                                                                                                                                                                                                                                             |
| pten   | mirn21 | <a href="http://www.ncbi.nlm.nih.gov/entrez/query.fcgi?cmd=Retrieve&amp;db=pubmed&amp;dopt=Abstract&amp;list_uids=25142071">http://www.ncbi.nlm.nih.gov/entrez/query.fcgi?cmd=Retrieve&amp;db=pubmed&amp;dopt=Abstract&amp;list_uids=25142071</a>  6 Metallomics 6 12 Dec 2014 Journal Article,Research Support, Non-U.S. Gov't                                                                                                                                                                                                                                                                                                                                             |
| tlr4   | ros1   | <a href="http://www.ncbi.nlm.nih.gov/entrez/query.fcgi?cmd=Retrieve&amp;db=pubmed&amp;dopt=Abstract&amp;list_uids=25130439">http://www.ncbi.nlm.nih.gov/entrez/query.fcgi?cmd=Retrieve&amp;db=pubmed&amp;dopt=Abstract&amp;list_uids=25130439</a>  6 Int J Biochem Cell Biol 55 Oct 2014 Journal Article,Research Support, Non-U.S. Gov't                                                                                                                                                                                                                                                                                                                                   |
| tlr4   | pkc    | <a href="http://www.ncbi.nlm.nih.gov/entrez/query.fcgi?cmd=Retrieve&amp;db=pubmed&amp;dopt=Abstract&amp;list_uids=25130439">http://www.ncbi.nlm.nih.gov/entrez/query.fcgi?cmd=Retrieve&amp;db=pubmed&amp;dopt=Abstract&amp;list_uids=25130439</a>  6 Int J Biochem Cell Biol 55 Oct 2014 Journal Article,Research Support, Non-U.S. Gov't                                                                                                                                                                                                                                                                                                                                   |
| ros1   | pkc    | <a href="http://www.ncbi.nlm.nih.gov/entrez/query.fcgi?cmd=Retrieve&amp;db=pubmed&amp;dopt=Abstract&amp;list_uids=25130439">http://www.ncbi.nlm.nih.gov/entrez/query.fcgi?cmd=Retrieve&amp;db=pubmed&amp;dopt=Abstract&amp;list_uids=25130439</a>  6 Int J Biochem Cell Biol 55 Oct 2014 Journal Article,Research Support, Non-U.S. Gov't                                                                                                                                                                                                                                                                                                                                   |
| trpm7  | irf6   | <a href="http://www.ncbi.nlm.nih.gov/entrez/query.fcgi?cmd=Retrieve&amp;db=pubmed&amp;dopt=Abstract&amp;list_uids=25130439">http://www.ncbi.nlm.nih.gov/entrez/query.fcgi?cmd=Retrieve&amp;db=pubmed&amp;dopt=Abstract&amp;list_uids=25130439</a>  6 Int J Biochem Cell Biol 55 Oct 2014 Journal Article,Research Support, Non-U.S. Gov't                                                                                                                                                                                                                                                                                                                                   |
| pdlim7 | pdlim5 | <a href="http://www.ncbi.nlm.nih.gov/entrez/query.fcgi?cmd=Retrieve&amp;db=pubmed&amp;dopt=Abstract&amp;list_uids=25124035">http://www.ncbi.nlm.nih.gov/entrez/query.fcgi?cmd=Retrieve&amp;db=pubmed&amp;dopt=Abstract&amp;list_uids=25124035</a>  6 J Biol Chem 289 43 Oct 2014 Journal Article,Research Support, N.I.H., Extramural,Research Support, Non-U.S. Gov't                                                                                                                                                                                                                                                                                                      |
| pdlim7 | pkc    | <a href="http://www.ncbi.nlm.nih.gov/entrez/query.fcgi?cmd=Retrieve&amp;db=pubmed&amp;dopt=Abstract&amp;list_uids=25124035">http://www.ncbi.nlm.nih.gov/entrez/query.fcgi?cmd=Retrieve&amp;db=pubmed&amp;dopt=Abstract&amp;list_uids=25124035</a>  6 J Biol Chem 289 43 Oct 2014 Journal Article,Research Support, N.I.H., Extramural,Research Support, Non-U.S. Gov't                                                                                                                                                                                                                                                                                                      |
| pdlim5 | pkc    | <a href="http://www.ncbi.nlm.nih.gov/entrez/query.fcgi?cmd=Retrieve&amp;db=pubmed&amp;dopt=Abstract&amp;list_uids=25124035">http://www.ncbi.nlm.nih.gov/entrez/query.fcgi?cmd=Retrieve&amp;db=pubmed&amp;dopt=Abstract&amp;list_uids=25124035</a>  6 J Biol Chem 289 43 Oct 2014 Journal Article,Research Support, N.I.H., Extramural,Research Support, Non-U.S. Gov't                                                                                                                                                                                                                                                                                                      |



|         |         |                                                                                                                                                                                                                                                                                                                                                                                                                                                                                                                                                                                                                                                           |
|---------|---------|-----------------------------------------------------------------------------------------------------------------------------------------------------------------------------------------------------------------------------------------------------------------------------------------------------------------------------------------------------------------------------------------------------------------------------------------------------------------------------------------------------------------------------------------------------------------------------------------------------------------------------------------------------------|
| actin   | msc     | <a href="http://www.ncbi.nlm.nih.gov/entrez/query.fcgi?cmd=Retrieve&amp;db=pubmed&amp;dopt=Abstract&amp;list_uids=25107365">http://www.ncbi.nlm.nih.gov/entrez/query.fcgi?cmd=Retrieve&amp;db=pubmed&amp;dopt=Abstract&amp;list_uids=25107365</a>  6 J Cell Sci 127 Pt 19 Oct 2014 Journal Article,Research Support, Non-U.S. Gov't                                                                                                                                                                                                                                                                                                                       |
| arhgef2 | msc     | <a href="http://www.ncbi.nlm.nih.gov/entrez/query.fcgi?cmd=Retrieve&amp;db=pubmed&amp;dopt=Abstract&amp;list_uids=25107365">http://www.ncbi.nlm.nih.gov/entrez/query.fcgi?cmd=Retrieve&amp;db=pubmed&amp;dopt=Abstract&amp;list_uids=25107365</a>  6 J Cell Sci 127 Pt 19 Oct 2014 Journal Article,Research Support, Non-U.S. Gov't                                                                                                                                                                                                                                                                                                                       |
| fermt2  | fermt3  | <a href="http://www.ncbi.nlm.nih.gov/entrez/query.fcgi?cmd=Retrieve&amp;db=pubmed&amp;dopt=Abstract&amp;list_uids=25086068">http://www.ncbi.nlm.nih.gov/entrez/query.fcgi?cmd=Retrieve&amp;db=pubmed&amp;dopt=Abstract&amp;list_uids=25086068</a>  6 J Cell Sci 127 Pt 19 Oct 2014 Journal Article,Research Support, N.I.H., Extramural,Research Support, Non-U.S. Gov't                                                                                                                                                                                                                                                                                  |
| fermt2  | fas     | <a href="http://www.ncbi.nlm.nih.gov/entrez/query.fcgi?cmd=Retrieve&amp;db=pubmed&amp;dopt=Abstract&amp;list_uids=25086068">http://www.ncbi.nlm.nih.gov/entrez/query.fcgi?cmd=Retrieve&amp;db=pubmed&amp;dopt=Abstract&amp;list_uids=25086068</a>  6 J Cell Sci 127 Pt 19 Oct 2014 Journal Article,Research Support, N.I.H., Extramural,Research Support, Non-U.S. Gov't                                                                                                                                                                                                                                                                                  |
| fermt3  | fas     | <a href="http://www.ncbi.nlm.nih.gov/entrez/query.fcgi?cmd=Retrieve&amp;db=pubmed&amp;dopt=Abstract&amp;list_uids=25086068">http://www.ncbi.nlm.nih.gov/entrez/query.fcgi?cmd=Retrieve&amp;db=pubmed&amp;dopt=Abstract&amp;list_uids=25086068</a>  6 J Cell Sci 127 Pt 19 Oct 2014 Journal Article,Research Support, N.I.H., Extramural,Research Support, Non-U.S. Gov't                                                                                                                                                                                                                                                                                  |
| hps1    | actin   | <a href="http://www.ncbi.nlm.nih.gov/entrez/query.fcgi?cmd=Retrieve&amp;db=pubmed&amp;dopt=Abstract&amp;list_uids=25050736">http://www.ncbi.nlm.nih.gov/entrez/query.fcgi?cmd=Retrieve&amp;db=pubmed&amp;dopt=Abstract&amp;list_uids=25050736</a>  6 ACS Nano 8 8 Aug 2014 Journal Article,Research Support, Non-U.S. Gov't                                                                                                                                                                                                                                                                                                                               |
| mark1   | dixdc1  | <a href="http://www.ncbi.nlm.nih.gov/entrez/query.fcgi?cmd=Retrieve&amp;db=pubmed&amp;dopt=Abstract&amp;list_uids=25042806">http://www.ncbi.nlm.nih.gov/entrez/query.fcgi?cmd=Retrieve&amp;db=pubmed&amp;dopt=Abstract&amp;list_uids=25042806</a>  6 Mol Cell 55 3 Aug 2014 Journal Article,Research Support, N.I.H., Extramural,Research Support, Non-U.S. Gov't                                                                                                                                                                                                                                                                                         |
| prkaa1  | stk11   | <a href="http://www.ncbi.nlm.nih.gov/entrez/query.fcgi?cmd=Retrieve&amp;db=pubmed&amp;dopt=Abstract&amp;list_uids=25042806">http://www.ncbi.nlm.nih.gov/entrez/query.fcgi?cmd=Retrieve&amp;db=pubmed&amp;dopt=Abstract&amp;list_uids=25042806</a>  6 Mol Cell 55 3 Aug 2014 Journal Article,Research Support, N.I.H., Extramural,Research Support, Non-U.S. Gov't                                                                                                                                                                                                                                                                                         |
| bsg     | hcc     | <a href="http://www.ncbi.nlm.nih.gov/entrez/query.fcgi?cmd=Retrieve&amp;db=pubmed&amp;dopt=Abstract&amp;list_uids=25033086">http://www.ncbi.nlm.nih.gov/entrez/query.fcgi?cmd=Retrieve&amp;db=pubmed&amp;dopt=Abstract&amp;list_uids=25033086</a>  6 PLoS One 9 7  2014 Journal Article,Research Support, Non-U.S. Gov't                                                                                                                                                                                                                                                                                                                                  |
| bsg     | actr2   | <a href="http://www.ncbi.nlm.nih.gov/entrez/query.fcgi?cmd=Retrieve&amp;db=pubmed&amp;dopt=Abstract&amp;list_uids=25033086">http://www.ncbi.nlm.nih.gov/entrez/query.fcgi?cmd=Retrieve&amp;db=pubmed&amp;dopt=Abstract&amp;list_uids=25033086</a>  6 PLoS One 9 7  2014 Journal Article,Research Support, Non-U.S. Gov't                                                                                                                                                                                                                                                                                                                                  |
| fgfr2   | fgf2    | <a href="http://www.ncbi.nlm.nih.gov/entrez/query.fcgi?cmd=Retrieve&amp;db=pubmed&amp;dopt=Abstract&amp;list_uids=25014166">http://www.ncbi.nlm.nih.gov/entrez/query.fcgi?cmd=Retrieve&amp;db=pubmed&amp;dopt=Abstract&amp;list_uids=25014166</a>  6 Biochim Biophys Acta 1843 11 Nov 2014 Journal Article                                                                                                                                                                                                                                                                                                                                                |
| ephb2   | src     | <a href="http://www.ncbi.nlm.nih.gov/entrez/query.fcgi?cmd=Retrieve&amp;db=pubmed&amp;dopt=Abstract&amp;list_uids=25014166">http://www.ncbi.nlm.nih.gov/entrez/query.fcgi?cmd=Retrieve&amp;db=pubmed&amp;dopt=Abstract&amp;list_uids=25014166</a>  6 Biochim Biophys Acta 1843 11 Nov 2014 Journal Article                                                                                                                                                                                                                                                                                                                                                |
| ephb2   | mapk14  | <a href="http://www.ncbi.nlm.nih.gov/entrez/query.fcgi?cmd=Retrieve&amp;db=pubmed&amp;dopt=Abstract&amp;list_uids=25014166">http://www.ncbi.nlm.nih.gov/entrez/query.fcgi?cmd=Retrieve&amp;db=pubmed&amp;dopt=Abstract&amp;list_uids=25014166</a>  6 Biochim Biophys Acta 1843 11 Nov 2014 Journal Article  <a href="http://www.ncbi.nlm.nih.gov/entrez/query.fcgi?cmd=Retrieve&amp;db=pubmed&amp;dopt=Abstract&amp;list_uids=24894398">http://www.ncbi.nlm.nih.gov/entrez/query.fcgi?cmd=Retrieve&amp;db=pubmed&amp;dopt=Abstract&amp;list_uids=24894398</a>  6 Invest Ophthalmol Vis Sci 55 7 Jul 2014 Journal Article,Research Support, Non-U.S. Gov't |
| ephb2   | rps6ka3 | <a href="http://www.ncbi.nlm.nih.gov/entrez/query.fcgi?cmd=Retrieve&amp;db=pubmed&amp;dopt=Abstract&amp;list_uids=25014166">http://www.ncbi.nlm.nih.gov/entrez/query.fcgi?cmd=Retrieve&amp;db=pubmed&amp;dopt=Abstract&amp;list_uids=25014166</a>  6 Biochim Biophys Acta 1843 11 Nov 2014 Journal Article                                                                                                                                                                                                                                                                                                                                                |
| src     | mapk14  | <a href="http://www.ncbi.nlm.nih.gov/entrez/query.fcgi?cmd=Retrieve&amp;db=pubmed&amp;dopt=Abstract&amp;list_uids=25014166">http://www.ncbi.nlm.nih.gov/entrez/query.fcgi?cmd=Retrieve&amp;db=pubmed&amp;dopt=Abstract&amp;list_uids=25014166</a>  6 Biochim Biophys Acta 1843 11 Nov 2014 Journal Article                                                                                                                                                                                                                                                                                                                                                |
| src     | rps6ka3 | <a href="http://www.ncbi.nlm.nih.gov/entrez/query.fcgi?cmd=Retrieve&amp;db=pubmed&amp;dopt=Abstract&amp;list_uids=25014166">http://www.ncbi.nlm.nih.gov/entrez/query.fcgi?cmd=Retrieve&amp;db=pubmed&amp;dopt=Abstract&amp;list_uids=25014166</a>  6 Biochim Biophys Acta 1843 11 Nov 2014 Journal Article                                                                                                                                                                                                                                                                                                                                                |
| mapk14  | rps6ka3 | <a href="http://www.ncbi.nlm.nih.gov/entrez/query.fcgi?cmd=Retrieve&amp;db=pubmed&amp;dopt=Abstract&amp;list_uids=25014166">http://www.ncbi.nlm.nih.gov/entrez/query.fcgi?cmd=Retrieve&amp;db=pubmed&amp;dopt=Abstract&amp;list_uids=25014166</a>  6 Biochim Biophys Acta 1843 11 Nov 2014 Journal Article                                                                                                                                                                                                                                                                                                                                                |

|         |         |                                                                                                                                                                                                                                                                                                                                                                                                                                                                                                                                                                                                                                                                                                       |
|---------|---------|-------------------------------------------------------------------------------------------------------------------------------------------------------------------------------------------------------------------------------------------------------------------------------------------------------------------------------------------------------------------------------------------------------------------------------------------------------------------------------------------------------------------------------------------------------------------------------------------------------------------------------------------------------------------------------------------------------|
| fgf2    | mapk14  | <a href="http://www.ncbi.nlm.nih.gov/entrez/query.fcgi?cmd=Retrieve&amp;db=pubmed&amp;dopt=Abstract&amp;list_uids=25014166">http://www.ncbi.nlm.nih.gov/entrez/query.fcgi?cmd=Retrieve&amp;db=pubmed&amp;dopt=Abstract&amp;list_uids=25014166</a> [6]Biochim Biophys Acta 1843 11 Nov 2014 Journal Article                                                                                                                                                                                                                                                                                                                                                                                            |
| fgf2    | ephb2   | <a href="http://www.ncbi.nlm.nih.gov/entrez/query.fcgi?cmd=Retrieve&amp;db=pubmed&amp;dopt=Abstract&amp;list_uids=25014166">http://www.ncbi.nlm.nih.gov/entrez/query.fcgi?cmd=Retrieve&amp;db=pubmed&amp;dopt=Abstract&amp;list_uids=25014166</a> [6]Biochim Biophys Acta 1843 11 Nov 2014 Journal Article  <a href="http://www.ncbi.nlm.nih.gov/entrez/query.fcgi?cmd=Retrieve&amp;db=pubmed&amp;dopt=Abstract&amp;list_uids=24466271">http://www.ncbi.nlm.nih.gov/entrez/query.fcgi?cmd=Retrieve&amp;db=pubmed&amp;dopt=Abstract&amp;list_uids=24466271</a> [6]P LoS One 9 1 2014 Journal Article,Research Support, N.I.H., Extramural,Research Support, Non-U.S. Gov't                             |
| fgf2    | rps6ka3 | <a href="http://www.ncbi.nlm.nih.gov/entrez/query.fcgi?cmd=Retrieve&amp;db=pubmed&amp;dopt=Abstract&amp;list_uids=25014166">http://www.ncbi.nlm.nih.gov/entrez/query.fcgi?cmd=Retrieve&amp;db=pubmed&amp;dopt=Abstract&amp;list_uids=25014166</a> [6]Biochim Biophys Acta 1843 11 Nov 2014 Journal Article                                                                                                                                                                                                                                                                                                                                                                                            |
| fgfr2   | mapk14  | <a href="http://www.ncbi.nlm.nih.gov/entrez/query.fcgi?cmd=Retrieve&amp;db=pubmed&amp;dopt=Abstract&amp;list_uids=25014166">http://www.ncbi.nlm.nih.gov/entrez/query.fcgi?cmd=Retrieve&amp;db=pubmed&amp;dopt=Abstract&amp;list_uids=25014166</a> [6]Biochim Biophys Acta 1843 11 Nov 2014 Journal Article                                                                                                                                                                                                                                                                                                                                                                                            |
| fgfr2   | ephb2   | <a href="http://www.ncbi.nlm.nih.gov/entrez/query.fcgi?cmd=Retrieve&amp;db=pubmed&amp;dopt=Abstract&amp;list_uids=25014166">http://www.ncbi.nlm.nih.gov/entrez/query.fcgi?cmd=Retrieve&amp;db=pubmed&amp;dopt=Abstract&amp;list_uids=25014166</a> [6]Biochim Biophys Acta 1843 11 Nov 2014 Journal Article                                                                                                                                                                                                                                                                                                                                                                                            |
| fgfr2   | rps6ka3 | <a href="http://www.ncbi.nlm.nih.gov/entrez/query.fcgi?cmd=Retrieve&amp;db=pubmed&amp;dopt=Abstract&amp;list_uids=25014166">http://www.ncbi.nlm.nih.gov/entrez/query.fcgi?cmd=Retrieve&amp;db=pubmed&amp;dopt=Abstract&amp;list_uids=25014166</a> [6]Biochim Biophys Acta 1843 11 Nov 2014 Journal Article                                                                                                                                                                                                                                                                                                                                                                                            |
| fgf2    | egf     | <a href="http://www.ncbi.nlm.nih.gov/entrez/query.fcgi?cmd=Retrieve&amp;db=pubmed&amp;dopt=Abstract&amp;list_uids=25014166">http://www.ncbi.nlm.nih.gov/entrez/query.fcgi?cmd=Retrieve&amp;db=pubmed&amp;dopt=Abstract&amp;list_uids=25014166</a> [6]Biochim Biophys Acta 1843 11 Nov 2014 Journal Article                                                                                                                                                                                                                                                                                                                                                                                            |
| fgf2    | rps6ka1 | <a href="http://www.ncbi.nlm.nih.gov/entrez/query.fcgi?cmd=Retrieve&amp;db=pubmed&amp;dopt=Abstract&amp;list_uids=25014166">http://www.ncbi.nlm.nih.gov/entrez/query.fcgi?cmd=Retrieve&amp;db=pubmed&amp;dopt=Abstract&amp;list_uids=25014166</a> [6]Biochim Biophys Acta 1843 11 Nov 2014 Journal Article                                                                                                                                                                                                                                                                                                                                                                                            |
| mapk14  | rps6ka1 | <a href="http://www.ncbi.nlm.nih.gov/entrez/query.fcgi?cmd=Retrieve&amp;db=pubmed&amp;dopt=Abstract&amp;list_uids=25014166">http://www.ncbi.nlm.nih.gov/entrez/query.fcgi?cmd=Retrieve&amp;db=pubmed&amp;dopt=Abstract&amp;list_uids=25014166</a> [6]Biochim Biophys Acta 1843 11 Nov 2014 Journal Article                                                                                                                                                                                                                                                                                                                                                                                            |
| egf     | rps6ka1 | <a href="http://www.ncbi.nlm.nih.gov/entrez/query.fcgi?cmd=Retrieve&amp;db=pubmed&amp;dopt=Abstract&amp;list_uids=25014166">http://www.ncbi.nlm.nih.gov/entrez/query.fcgi?cmd=Retrieve&amp;db=pubmed&amp;dopt=Abstract&amp;list_uids=25014166</a> [6]Biochim Biophys Acta 1843 11 Nov 2014 Journal Article                                                                                                                                                                                                                                                                                                                                                                                            |
| egf     | fgfr2   | <a href="http://www.ncbi.nlm.nih.gov/entrez/query.fcgi?cmd=Retrieve&amp;db=pubmed&amp;dopt=Abstract&amp;list_uids=25014166">http://www.ncbi.nlm.nih.gov/entrez/query.fcgi?cmd=Retrieve&amp;db=pubmed&amp;dopt=Abstract&amp;list_uids=25014166</a> [6]Biochim Biophys Acta 1843 11 Nov 2014 Journal Article                                                                                                                                                                                                                                                                                                                                                                                            |
| rps6ka1 | fgfr2   | <a href="http://www.ncbi.nlm.nih.gov/entrez/query.fcgi?cmd=Retrieve&amp;db=pubmed&amp;dopt=Abstract&amp;list_uids=25014166">http://www.ncbi.nlm.nih.gov/entrez/query.fcgi?cmd=Retrieve&amp;db=pubmed&amp;dopt=Abstract&amp;list_uids=25014166</a> [6]Biochim Biophys Acta 1843 11 Nov 2014 Journal Article                                                                                                                                                                                                                                                                                                                                                                                            |
| egfr    | akt1    | <a href="http://www.ncbi.nlm.nih.gov/entrez/query.fcgi?cmd=Retrieve&amp;db=pubmed&amp;dopt=Abstract&amp;list_uids=24861878">http://www.ncbi.nlm.nih.gov/entrez/query.fcgi?cmd=Retrieve&amp;db=pubmed&amp;dopt=Abstract&amp;list_uids=24861878</a> [6]Neuro Oncol 16 9 Sep 2014 Journal Article,Research Support, Non-U.S. Gov't  <a href="http://www.ncbi.nlm.nih.gov/entrez/query.fcgi?cmd=Retrieve&amp;db=pubmed&amp;dopt=Abstract&amp;list_uids=25000176">http://www.ncbi.nlm.nih.gov/entrez/query.fcgi?cmd=Retrieve&amp;db=pubmed&amp;dopt=Abstract&amp;list_uids=25000176</a> [6]PLoS One 9 7 2014 Journal Article,Research Support, N.I.H., Extramural,Research Support, U.S. Gov't, Non-P.H.S. |
| egfr    | pi3     | <a href="http://www.ncbi.nlm.nih.gov/entrez/query.fcgi?cmd=Retrieve&amp;db=pubmed&amp;dopt=Abstract&amp;list_uids=25000176">http://www.ncbi.nlm.nih.gov/entrez/query.fcgi?cmd=Retrieve&amp;db=pubmed&amp;dopt=Abstract&amp;list_uids=25000176</a> [6]PLoS One 9 7 2014 Journal Article,Research Support, N.I.H., Extramural,Research Support, U.S. Gov't, Non-P.H.S.                                                                                                                                                                                                                                                                                                                                  |
| actr2   | mmrn1   | <a href="http://www.ncbi.nlm.nih.gov/entrez/query.fcgi?cmd=Retrieve&amp;db=pubmed&amp;dopt=Abstract&amp;list_uids=24967897">http://www.ncbi.nlm.nih.gov/entrez/query.fcgi?cmd=Retrieve&amp;db=pubmed&amp;dopt=Abstract&amp;list_uids=24967897</a> [6]PLoS One 9 6 2014 Journal Article,Research Support, Non-U.S. Gov't                                                                                                                                                                                                                                                                                                                                                                               |
| actin   | dstn    | <a href="http://www.ncbi.nlm.nih.gov/entrez/query.fcgi?cmd=Retrieve&amp;db=pubmed&amp;dopt=Abstract&amp;list_uids=24965068">http://www.ncbi.nlm.nih.gov/entrez/query.fcgi?cmd=Retrieve&amp;db=pubmed&amp;dopt=Abstract&amp;list_uids=24965068</a> [6]Pflugers Arch 467 1 Jan 2015 Journal Article,Research Support, Non-U.S. Gov't,Review                                                                                                                                                                                                                                                                                                                                                             |

|         |         |                                                                                                                                                                                                                                                                                                                                                                                                                                                                                                                                                                                                                                                                                                                                                                                                                                                                                                                                                                                                                                                                                                                                                                                                                                                                                                                                                                           |
|---------|---------|---------------------------------------------------------------------------------------------------------------------------------------------------------------------------------------------------------------------------------------------------------------------------------------------------------------------------------------------------------------------------------------------------------------------------------------------------------------------------------------------------------------------------------------------------------------------------------------------------------------------------------------------------------------------------------------------------------------------------------------------------------------------------------------------------------------------------------------------------------------------------------------------------------------------------------------------------------------------------------------------------------------------------------------------------------------------------------------------------------------------------------------------------------------------------------------------------------------------------------------------------------------------------------------------------------------------------------------------------------------------------|
| isl1    | pdlm5   | <a href="http://www.ncbi.nlm.nih.gov/entrez/query.fcgi?cmd=Retrieve&amp;db=pubmed&amp;dopt=Abstract&amp;list_uids=24933506">http://www.ncbi.nlm.nih.gov/entrez/query.fcgi?cmd=Retrieve&amp;db=pubmed&amp;dopt=Abstract&amp;list_uids=24933506</a>  6 Trends Cell Biol 24 10 Oct 2014 Journal Article,Research Support, N.I.H., Extramural,Research Support, Non-U.S. Gov't,Review                                                                                                                                                                                                                                                                                                                                                                                                                                                                                                                                                                                                                                                                                                                                                                                                                                                                                                                                                                                         |
| bcar1   | actin   | <a href="http://www.ncbi.nlm.nih.gov/entrez/query.fcgi?cmd=Retrieve&amp;db=pubmed&amp;dopt=Abstract&amp;list_uids=24928898">http://www.ncbi.nlm.nih.gov/entrez/query.fcgi?cmd=Retrieve&amp;db=pubmed&amp;dopt=Abstract&amp;list_uids=24928898</a>  6 J Cell Sci 127 Pt 16 Aug 2014 Journal Article,Research Support, Non-U.S. Gov't                                                                                                                                                                                                                                                                                                                                                                                                                                                                                                                                                                                                                                                                                                                                                                                                                                                                                                                                                                                                                                       |
| bcar1   | 3.6.4.1 | <a href="http://www.ncbi.nlm.nih.gov/entrez/query.fcgi?cmd=Retrieve&amp;db=pubmed&amp;dopt=Abstract&amp;list_uids=24928898">http://www.ncbi.nlm.nih.gov/entrez/query.fcgi?cmd=Retrieve&amp;db=pubmed&amp;dopt=Abstract&amp;list_uids=24928898</a>  6 J Cell Sci 127 Pt 16 Aug 2014 Journal Article,Research Support, Non-U.S. Gov't                                                                                                                                                                                                                                                                                                                                                                                                                                                                                                                                                                                                                                                                                                                                                                                                                                                                                                                                                                                                                                       |
| cse11   | actin   | <a href="http://www.ncbi.nlm.nih.gov/entrez/query.fcgi?cmd=Retrieve&amp;db=pubmed&amp;dopt=Abstract&amp;list_uids=24928898">http://www.ncbi.nlm.nih.gov/entrez/query.fcgi?cmd=Retrieve&amp;db=pubmed&amp;dopt=Abstract&amp;list_uids=24928898</a>  6 J Cell Sci 127 Pt 16 Aug 2014 Journal Article,Research Support, Non-U.S. Gov't                                                                                                                                                                                                                                                                                                                                                                                                                                                                                                                                                                                                                                                                                                                                                                                                                                                                                                                                                                                                                                       |
| cse11   | 3.6.4.1 | <a href="http://www.ncbi.nlm.nih.gov/entrez/query.fcgi?cmd=Retrieve&amp;db=pubmed&amp;dopt=Abstract&amp;list_uids=24928898">http://www.ncbi.nlm.nih.gov/entrez/query.fcgi?cmd=Retrieve&amp;db=pubmed&amp;dopt=Abstract&amp;list_uids=24928898</a>  6 J Cell Sci 127 Pt 16 Aug 2014 Journal Article,Research Support, Non-U.S. Gov't                                                                                                                                                                                                                                                                                                                                                                                                                                                                                                                                                                                                                                                                                                                                                                                                                                                                                                                                                                                                                                       |
| actin   | 3.6.4.1 | <a href="http://www.ncbi.nlm.nih.gov/entrez/query.fcgi?cmd=Retrieve&amp;db=pubmed&amp;dopt=Abstract&amp;list_uids=24928898">http://www.ncbi.nlm.nih.gov/entrez/query.fcgi?cmd=Retrieve&amp;db=pubmed&amp;dopt=Abstract&amp;list_uids=24928898</a>  6 J Cell Sci 127 Pt 16 Aug 2014 Journal Article,Research Support, Non-U.S. Gov't  <a href="http://www.ncbi.nlm.nih.gov/entrez/query.fcgi?cmd=Retrieve&amp;db=pubmed&amp;dopt=Abstract&amp;list_uids=22524451">http://www.ncbi.nlm.nih.gov/entrez/query.fcgi?cmd=Retrieve&amp;db=pubmed&amp;dopt=Abstract&amp;list_uids=22524451</a>  6 Cell Biol Int 36 7 Jul 2012 Journal Article,Research Support, Non-U.S. Gov't  <a href="http://www.ncbi.nlm.nih.gov/entrez/query.fcgi?cmd=Retrieve&amp;db=pubmed&amp;dopt=Abstract&amp;list_uids=23378028">http://www.ncbi.nlm.nih.gov/entrez/query.fcgi?cmd=Retrieve&amp;db=pubmed&amp;dopt=Abstract&amp;list_uids=23378028</a>  6 J Cell Sci 126 Pt 5 Mar 2013 Journal Article,Research Support, Non-U.S. Gov't  <a href="http://www.ncbi.nlm.nih.gov/entrez/query.fcgi?cmd=Retrieve&amp;db=pubmed&amp;dopt=Abstract&amp;list_uids=24039980">http://www.ncbi.nlm.nih.gov/entrez/query.fcgi?cmd=Retrieve&amp;db=pubmed&amp;dopt=Abstract&amp;list_uids=24039980</a>  6 PLoS One 8 9  2013 Journal Article,Research Support, N.I.H., Extramural,Research Support, Non-U.S. Gov't |
| frap1   | cse11   | <a href="http://www.ncbi.nlm.nih.gov/entrez/query.fcgi?cmd=Retrieve&amp;db=pubmed&amp;dopt=Abstract&amp;list_uids=24928898">http://www.ncbi.nlm.nih.gov/entrez/query.fcgi?cmd=Retrieve&amp;db=pubmed&amp;dopt=Abstract&amp;list_uids=24928898</a>  6 J Cell Sci 127 Pt 16 Aug 2014 Journal Article,Research Support, Non-U.S. Gov't                                                                                                                                                                                                                                                                                                                                                                                                                                                                                                                                                                                                                                                                                                                                                                                                                                                                                                                                                                                                                                       |
| frap1   | src     | <a href="http://www.ncbi.nlm.nih.gov/entrez/query.fcgi?cmd=Retrieve&amp;db=pubmed&amp;dopt=Abstract&amp;list_uids=24928898">http://www.ncbi.nlm.nih.gov/entrez/query.fcgi?cmd=Retrieve&amp;db=pubmed&amp;dopt=Abstract&amp;list_uids=24928898</a>  6 J Cell Sci 127 Pt 16 Aug 2014 Journal Article,Research Support, Non-U.S. Gov't                                                                                                                                                                                                                                                                                                                                                                                                                                                                                                                                                                                                                                                                                                                                                                                                                                                                                                                                                                                                                                       |
| myh14   | cse11   | <a href="http://www.ncbi.nlm.nih.gov/entrez/query.fcgi?cmd=Retrieve&amp;db=pubmed&amp;dopt=Abstract&amp;list_uids=24928898">http://www.ncbi.nlm.nih.gov/entrez/query.fcgi?cmd=Retrieve&amp;db=pubmed&amp;dopt=Abstract&amp;list_uids=24928898</a>  6 J Cell Sci 127 Pt 16 Aug 2014 Journal Article,Research Support, Non-U.S. Gov't  <a href="http://www.ncbi.nlm.nih.gov/entrez/query.fcgi?cmd=Retrieve&amp;db=pubmed&amp;dopt=Abstract&amp;list_uids=22915102">http://www.ncbi.nlm.nih.gov/entrez/query.fcgi?cmd=Retrieve&amp;db=pubmed&amp;dopt=Abstract&amp;list_uids=22915102</a>  6 J Neurosci 32 34 Aug 2012 Journal Article,Research Support, N.I.H., Extramural,Research Support, Non-U.S. Gov't,Validation Studies                                                                                                                                                                                                                                                                                                                                                                                                                                                                                                                                                                                                                                              |
| 3.6.4.1 | src     | <a href="http://www.ncbi.nlm.nih.gov/entrez/query.fcgi?cmd=Retrieve&amp;db=pubmed&amp;dopt=Abstract&amp;list_uids=24928898">http://www.ncbi.nlm.nih.gov/entrez/query.fcgi?cmd=Retrieve&amp;db=pubmed&amp;dopt=Abstract&amp;list_uids=24928898</a>  6 J Cell Sci 127 Pt 16 Aug 2014 Journal Article,Research Support, Non-U.S. Gov't  <a href="http://www.ncbi.nlm.nih.gov/entrez/query.fcgi?cmd=Retrieve&amp;db=pubmed&amp;dopt=Abstract&amp;list_uids=23708000">http://www.ncbi.nlm.nih.gov/entrez/query.fcgi?cmd=Retrieve&amp;db=pubmed&amp;dopt=Abstract&amp;list_uids=23708000</a>  6 Nat Cell Biol 15 6 Jun 2013 Journal Article,Research Support, Non-U.S. Gov't  <a href="http://www.ncbi.nlm.nih.gov/entrez/query.fcgi?cmd=Retrieve&amp;db=pubmed&amp;dopt=Abstract&amp;list_uids=23209645">http://www.ncbi.nlm.nih.gov/entrez/query.fcgi?cmd=Retrieve&amp;db=pubmed&amp;dopt=Abstract&amp;list_uids=23209645</a>  6 PLoS One 7 11  2012 Journal Article,Research Support, Non-U.S. Gov't                                                                                                                                                                                                                                                                                                                                                                         |
| tm4sf5  | stat3   | <a href="http://www.ncbi.nlm.nih.gov/entrez/query.fcgi?cmd=Retrieve&amp;db=pubmed&amp;dopt=Abstract&amp;list_uids=24912675">http://www.ncbi.nlm.nih.gov/entrez/query.fcgi?cmd=Retrieve&amp;db=pubmed&amp;dopt=Abstract&amp;list_uids=24912675</a>  6 Mol Cell Biol 34 16 Aug 2014 Journal Article,Research Support, Non-U.S. Gov't                                                                                                                                                                                                                                                                                                                                                                                                                                                                                                                                                                                                                                                                                                                                                                                                                                                                                                                                                                                                                                        |
| tm4sf5  | ptk2    | <a href="http://www.ncbi.nlm.nih.gov/entrez/query.fcgi?cmd=Retrieve&amp;db=pubmed&amp;dopt=Abstract&amp;list_uids=24912675">http://www.ncbi.nlm.nih.gov/entrez/query.fcgi?cmd=Retrieve&amp;db=pubmed&amp;dopt=Abstract&amp;list_uids=24912675</a>  6 Mol Cell                                                                                                                                                                                                                                                                                                                                                                                                                                                                                                                                                                                                                                                                                                                                                                                                                                                                                                                                                                                                                                                                                                             |

|        |        |                                                                                                                                                                                                                                                                                                                                                                                                                                                                                                                                                                                                                                                                                                                                                                                                                                                                                                                                                                                                                                                                                                                                                                                                                                                                                                                                                                                                                                                                                                                                                                                       |
|--------|--------|---------------------------------------------------------------------------------------------------------------------------------------------------------------------------------------------------------------------------------------------------------------------------------------------------------------------------------------------------------------------------------------------------------------------------------------------------------------------------------------------------------------------------------------------------------------------------------------------------------------------------------------------------------------------------------------------------------------------------------------------------------------------------------------------------------------------------------------------------------------------------------------------------------------------------------------------------------------------------------------------------------------------------------------------------------------------------------------------------------------------------------------------------------------------------------------------------------------------------------------------------------------------------------------------------------------------------------------------------------------------------------------------------------------------------------------------------------------------------------------------------------------------------------------------------------------------------------------|
|        |        | Biol 34 16 Aug 2014 Journal Article,Research Support, Non-U.S. Gov't                                                                                                                                                                                                                                                                                                                                                                                                                                                                                                                                                                                                                                                                                                                                                                                                                                                                                                                                                                                                                                                                                                                                                                                                                                                                                                                                                                                                                                                                                                                  |
| il6    | stat3  | <a href="http://www.ncbi.nlm.nih.gov/entrez/query.fcgi?cmd=Retrieve&amp;db=pubmed&amp;dopt=Abstract&amp;list_uids=24912675">http://www.ncbi.nlm.nih.gov/entrez/query.fcgi?cmd=Retrieve&amp;db=pubmed&amp;dopt=Abstract&amp;list_uids=24912675</a>  6 Mol Cell Biol 34 16 Aug 2014 Journal Article,Research Support, Non-U.S. Gov't                                                                                                                                                                                                                                                                                                                                                                                                                                                                                                                                                                                                                                                                                                                                                                                                                                                                                                                                                                                                                                                                                                                                                                                                                                                    |
| il6    | tm4sf5 | <a href="http://www.ncbi.nlm.nih.gov/entrez/query.fcgi?cmd=Retrieve&amp;db=pubmed&amp;dopt=Abstract&amp;list_uids=24912675">http://www.ncbi.nlm.nih.gov/entrez/query.fcgi?cmd=Retrieve&amp;db=pubmed&amp;dopt=Abstract&amp;list_uids=24912675</a>  6 Mol Cell Biol 34 16 Aug 2014 Journal Article,Research Support, Non-U.S. Gov't                                                                                                                                                                                                                                                                                                                                                                                                                                                                                                                                                                                                                                                                                                                                                                                                                                                                                                                                                                                                                                                                                                                                                                                                                                                    |
| ptk2   | stat3  | <a href="http://www.ncbi.nlm.nih.gov/entrez/query.fcgi?cmd=Retrieve&amp;db=pubmed&amp;dopt=Abstract&amp;list_uids=24861878">http://www.ncbi.nlm.nih.gov/entrez/query.fcgi?cmd=Retrieve&amp;db=pubmed&amp;dopt=Abstract&amp;list_uids=24861878</a>  6 Neuro Oncol 16 9 Sep 2014 Journal Article,Research Support, Non-U.S. Gov't  <a href="http://www.ncbi.nlm.nih.gov/entrez/query.fcgi?cmd=Retrieve&amp;db=pubmed&amp;dopt=Abstract&amp;list_uids=24912675">http://www.ncbi.nlm.nih.gov/entrez/query.fcgi?cmd=Retrieve&amp;db=pubmed&amp;dopt=Abstract&amp;list_uids=24912675</a>  6 Mol Cell Biol 34 16 Aug 2014 Journal Article,Research Support, Non-U.S. Gov't  <a href="http://www.ncbi.nlm.nih.gov/entrez/query.fcgi?cmd=Retrieve&amp;db=pubmed&amp;dopt=Abstract&amp;list_uids=24510996">http://www.ncbi.nlm.nih.gov/entrez/query.fcgi?cmd=Retrieve&amp;db=pubmed&amp;dopt=Abstract&amp;list_uids=24510996</a>  6 Anticancer Res 34 2 Feb 2014 Journal Article                                                                                                                                                                                                                                                                                                                                                                                                                                                                                                                                                                                                                |
| tm4sf5 | il6r   | <a href="http://www.ncbi.nlm.nih.gov/entrez/query.fcgi?cmd=Retrieve&amp;db=pubmed&amp;dopt=Abstract&amp;list_uids=24912675">http://www.ncbi.nlm.nih.gov/entrez/query.fcgi?cmd=Retrieve&amp;db=pubmed&amp;dopt=Abstract&amp;list_uids=24912675</a>  6 Mol Cell Biol 34 16 Aug 2014 Journal Article,Research Support, Non-U.S. Gov't                                                                                                                                                                                                                                                                                                                                                                                                                                                                                                                                                                                                                                                                                                                                                                                                                                                                                                                                                                                                                                                                                                                                                                                                                                                    |
| il6    | il6r   | <a href="http://www.ncbi.nlm.nih.gov/entrez/query.fcgi?cmd=Retrieve&amp;db=pubmed&amp;dopt=Abstract&amp;list_uids=24912675">http://www.ncbi.nlm.nih.gov/entrez/query.fcgi?cmd=Retrieve&amp;db=pubmed&amp;dopt=Abstract&amp;list_uids=24912675</a>  6 Mol Cell Biol 34 16 Aug 2014 Journal Article,Research Support, Non-U.S. Gov't                                                                                                                                                                                                                                                                                                                                                                                                                                                                                                                                                                                                                                                                                                                                                                                                                                                                                                                                                                                                                                                                                                                                                                                                                                                    |
| lpa    | rhoa   | <a href="http://www.ncbi.nlm.nih.gov/entrez/query.fcgi?cmd=Retrieve&amp;db=pubmed&amp;dopt=Abstract&amp;list_uids=23689132">http://www.ncbi.nlm.nih.gov/entrez/query.fcgi?cmd=Retrieve&amp;db=pubmed&amp;dopt=Abstract&amp;list_uids=23689132</a>  6 Mol Cell Biol 33 14 Jul 2013 Journal Article,Research Support, N.I.H., Extramural,Research Support, Non-U.S. Gov't  <a href="http://www.ncbi.nlm.nih.gov/entrez/query.fcgi?cmd=Retrieve&amp;db=pubmed&amp;dopt=Abstract&amp;list_uids=24911199">http://www.ncbi.nlm.nih.gov/entrez/query.fcgi?cmd=Retrieve&amp;db=pubmed&amp;dopt=Abstract&amp;list_uids=24911199</a>  6 FEBS Lett 588 17 Aug 2014 Journal Article,Research Support, Non-U.S. Gov't                                                                                                                                                                                                                                                                                                                                                                                                                                                                                                                                                                                                                                                                                                                                                                                                                                                                              |
| rhoa   | cdc42  | <a href="http://www.ncbi.nlm.nih.gov/entrez/query.fcgi?cmd=Retrieve&amp;db=pubmed&amp;dopt=Abstract&amp;list_uids=23615439">http://www.ncbi.nlm.nih.gov/entrez/query.fcgi?cmd=Retrieve&amp;db=pubmed&amp;dopt=Abstract&amp;list_uids=23615439</a>  6 Mol Biol Cell 24 12 Jun 2013 Journal Article,Research Support, N.I.H., Extramural  <a href="http://www.ncbi.nlm.nih.gov/entrez/query.fcgi?cmd=Retrieve&amp;db=pubmed&amp;dopt=Abstract&amp;list_uids=24333506">http://www.ncbi.nlm.nih.gov/entrez/query.fcgi?cmd=Retrieve&amp;db=pubmed&amp;dopt=Abstract&amp;list_uids=24333506</a>  6 Exp Cell Res 321 2 Feb 2014 Journal Article,Research Support, N.I.H., Extramural,Research Support, Non-U.S. Gov't  <a href="http://www.ncbi.nlm.nih.gov/entrez/query.fcgi?cmd=Retrieve&amp;db=pubmed&amp;dopt=Abstract&amp;list_uids=24903274">http://www.ncbi.nlm.nih.gov/entrez/query.fcgi?cmd=Retrieve&amp;db=pubmed&amp;dopt=Abstract&amp;list_uids=24903274</a>  6 FASEB J 28 9 Sep 2014 Journal Article,Research Support, Non-U.S. Gov't                                                                                                                                                                                                                                                                                                                                                                                                                                                                                                                                           |
| rhoa   | vegfa  | <a href="http://www.ncbi.nlm.nih.gov/entrez/query.fcgi?cmd=Retrieve&amp;db=pubmed&amp;dopt=Abstract&amp;list_uids=24903274">http://www.ncbi.nlm.nih.gov/entrez/query.fcgi?cmd=Retrieve&amp;db=pubmed&amp;dopt=Abstract&amp;list_uids=24903274</a>  6 FASEB J 28 9 Sep 2014 Journal Article,Research Support, Non-U.S. Gov't                                                                                                                                                                                                                                                                                                                                                                                                                                                                                                                                                                                                                                                                                                                                                                                                                                                                                                                                                                                                                                                                                                                                                                                                                                                           |
| rac1   | cdc42  | <a href="http://www.ncbi.nlm.nih.gov/entrez/query.fcgi?cmd=Retrieve&amp;db=pubmed&amp;dopt=Abstract&amp;list_uids=23615439">http://www.ncbi.nlm.nih.gov/entrez/query.fcgi?cmd=Retrieve&amp;db=pubmed&amp;dopt=Abstract&amp;list_uids=23615439</a>  6 Mol Biol Cell 24 12 Jun 2013 Journal Article,Research Support, N.I.H., Extramural  <a href="http://www.ncbi.nlm.nih.gov/entrez/query.fcgi?cmd=Retrieve&amp;db=pubmed&amp;dopt=Abstract&amp;list_uids=24788532">http://www.ncbi.nlm.nih.gov/entrez/query.fcgi?cmd=Retrieve&amp;db=pubmed&amp;dopt=Abstract&amp;list_uids=24788532</a>  6 Oncol Rep 31 6 Jun 2014 Journal Article,Research Support, Non-U.S. Gov't  <a href="http://www.ncbi.nlm.nih.gov/entrez/query.fcgi?cmd=Retrieve&amp;db=pubmed&amp;dopt=Abstract&amp;list_uids=24903274">http://www.ncbi.nlm.nih.gov/entrez/query.fcgi?cmd=Retrieve&amp;db=pubmed&amp;dopt=Abstract&amp;list_uids=24903274</a>  6 FASEB J 28 9 Sep 2014 Journal Article,Research Support, Non-U.S. Gov't  <a href="http://www.ncbi.nlm.nih.gov/entrez/query.fcgi?cmd=Retrieve&amp;db=pubmed&amp;dopt=Abstract&amp;list_uids=24632816">http://www.ncbi.nlm.nih.gov/entrez/query.fcgi?cmd=Retrieve&amp;db=pubmed&amp;dopt=Abstract&amp;list_uids=24632816</a>  6 PLoS One 9 3  2014 Journal Article,Research Support, Non-U.S. Gov't  <a href="http://www.ncbi.nlm.nih.gov/entrez/query.fcgi?cmd=Retrieve&amp;db=pubmed&amp;dopt=Abstract&amp;list_uids=23826261">http://www.ncbi.nlm.nih.gov/entrez/query.fcgi?cmd=Retrieve&amp;db=pubmed&amp;dopt=Abstract&amp;list_uids=23826261</a>  6 PL |

|        |       |                                                                                                                                                                                                                                                                                                                                                                                                                   |
|--------|-------|-------------------------------------------------------------------------------------------------------------------------------------------------------------------------------------------------------------------------------------------------------------------------------------------------------------------------------------------------------------------------------------------------------------------|
|        |       | oS One 8 6 2013 Journal Article,Research Support, Non-U.S. Gov't http://www.ncbi.nlm.nih.gov/entrez/query.fcgi?cmd=Retrieve&db=pubmed&dopt=Abstract&list_uids=23292068 6 Int J Oncol 42 3 Mar 2013 Journal Article,Research Support, Non-U.S. Gov't                                                                                                                                                               |
| cdc42  | vegfa | http://www.ncbi.nlm.nih.gov/entrez/query.fcgi?cmd=Retrieve&db=pubmed&dopt=Abstract&list_uids=24903274 6 FASEB J 28 9 Sep 2014 Journal Article,Research Support, Non-U.S. Gov't                                                                                                                                                                                                                                    |
| ephb2  | jun   | http://www.ncbi.nlm.nih.gov/entrez/query.fcgi?cmd=Retrieve&db=pubmed&dopt=Abstract&list_uids=24894398 6 Invest Ophthalmol Vis Sci 55 7 Jul 2014 Journal Article,Research Support, Non-U.S. Gov't                                                                                                                                                                                                                  |
| ephb2  | mapk8 | http://www.ncbi.nlm.nih.gov/entrez/query.fcgi?cmd=Retrieve&db=pubmed&dopt=Abstract&list_uids=24894398 6 Invest Ophthalmol Vis Sci 55 7 Jul 2014 Journal Article,Research Support, Non-U.S. Gov't                                                                                                                                                                                                                  |
| ephb2  | smad2 | http://www.ncbi.nlm.nih.gov/entrez/query.fcgi?cmd=Retrieve&db=pubmed&dopt=Abstract&list_uids=24894398 6 Invest Ophthalmol Vis Sci 55 7 Jul 2014 Journal Article,Research Support, Non-U.S. Gov't http://www.ncbi.nlm.nih.gov/entrez/query.fcgi?cmd=Retrieve&db=pubmed&dopt=Abstract&list_uids=24466271 6 PL oS One 9 1 2014 Journal Article,Research Support, N.I.H., Extramural,Research Support, Non-U.S. Gov't |
| mapk14 | jun   | http://www.ncbi.nlm.nih.gov/entrez/query.fcgi?cmd=Retrieve&db=pubmed&dopt=Abstract&list_uids=24894398 6 Invest Ophthalmol Vis Sci 55 7 Jul 2014 Journal Article,Research Support, Non-U.S. Gov't                                                                                                                                                                                                                  |
| mapk14 | mapk8 | http://www.ncbi.nlm.nih.gov/entrez/query.fcgi?cmd=Retrieve&db=pubmed&dopt=Abstract&list_uids=24894398 6 Invest Ophthalmol Vis Sci 55 7 Jul 2014 Journal Article,Research Support, Non-U.S. Gov't                                                                                                                                                                                                                  |
| mapk14 | smad2 | http://www.ncbi.nlm.nih.gov/entrez/query.fcgi?cmd=Retrieve&db=pubmed&dopt=Abstract&list_uids=24894398 6 Invest Ophthalmol Vis Sci 55 7 Jul 2014 Journal Article,Research Support, Non-U.S. Gov't                                                                                                                                                                                                                  |
| jun    | smad2 | http://www.ncbi.nlm.nih.gov/entrez/query.fcgi?cmd=Retrieve&db=pubmed&dopt=Abstract&list_uids=24894398 6 Invest Ophthalmol Vis Sci 55 7 Jul 2014 Journal Article,Research Support, Non-U.S. Gov't                                                                                                                                                                                                                  |
| mapk8  | smad2 | http://www.ncbi.nlm.nih.gov/entrez/query.fcgi?cmd=Retrieve&db=pubmed&dopt=Abstract&list_uids=24894398 6 Invest Ophthalmol Vis Sci 55 7 Jul 2014 Journal Article,Research Support, Non-U.S. Gov't                                                                                                                                                                                                                  |
| ephb2  | actin | http://www.ncbi.nlm.nih.gov/entrez/query.fcgi?cmd=Retrieve&db=pubmed&dopt=Abstract&list_uids=24894398 6 Invest Ophthalmol Vis Sci 55 7 Jul 2014 Journal Article,Research Support, Non-U.S. Gov't                                                                                                                                                                                                                  |
| mapk14 | actin | http://www.ncbi.nlm.nih.gov/entrez/query.fcgi?cmd=Retrieve&db=pubmed&dopt=Abstract&list_uids=24894398 6 Invest Ophthalmol Vis Sci 55 7 Jul 2014 Journal Article,Research Support, Non-U.S. Gov't                                                                                                                                                                                                                  |
| mapk8  | actin | http://www.ncbi.nlm.nih.gov/entrez/query.fcgi?cmd=Retrieve&db=pubmed&dopt=Abstract&list_uids=24894398 6 Invest Ophthalmol Vis Sci 55 7 Jul 2014 Journal Article,Research Support, Non-U.S. Gov't                                                                                                                                                                                                                  |
| actin  | jun   | http://www.ncbi.nlm.nih.gov/entrez/query.fcgi?cmd=Retrieve&db=pubmed&dopt=Abstract&list_uids=24894398 6 Invest Ophthalmol Vis Sci 55 7 Jul 2014 Journal Article,Research Support, Non-U.S. Gov't                                                                                                                                                                                                                  |
| jak2   | stat3 | http://www.ncbi.nlm.nih.gov/entrez/query.fcgi?cmd=Retrieve&db=pubmed&dopt=Abstract&list_uids=24861878 6 Neuro Oncol 16 9 Sep 2014 Journal Article,Research Support, Non-U.S. Gov't                                                                                                                                                                                                                                |
| jak2   | egfr  | http://www.ncbi.nlm.nih.gov/entrez/query.fcgi?cmd=Retrieve&db=pubmed&dopt=Abstract&list_uids=24861878 6 Neuro Oncol 16 9 Sep 2014 Journal Article,Research Support, Non-U.S. Gov't                                                                                                                                                                                                                                |
| jak2   | ptk2  | http://www.ncbi.nlm.nih.gov/entrez/query.fcgi?cmd=Retrieve&db=pubmed&dopt=Abstract&list_uids=24861878 6 Neuro                                                                                                                                                                                                                                                                                                     |

|          |        |                                                                                                                                                                                                                                                                                                                                                                                                                                                                                                                                                                                                                                                                                                            |
|----------|--------|------------------------------------------------------------------------------------------------------------------------------------------------------------------------------------------------------------------------------------------------------------------------------------------------------------------------------------------------------------------------------------------------------------------------------------------------------------------------------------------------------------------------------------------------------------------------------------------------------------------------------------------------------------------------------------------------------------|
|          |        | Oncol 16 9 Sep 2014 Journal Article,Research Support, Non-U.S. Gov't                                                                                                                                                                                                                                                                                                                                                                                                                                                                                                                                                                                                                                       |
| stat3    | egfr   | <a href="http://www.ncbi.nlm.nih.gov/entrez/query.fcgi?cmd=Retrieve&amp;db=pubmed&amp;dopt=Abstract&amp;list_uids=24861878">http://www.ncbi.nlm.nih.gov/entrez/query.fcgi?cmd=Retrieve&amp;db=pubmed&amp;dopt=Abstract&amp;list_uids=24861878</a>  6 Neuro Oncol 16 9 Sep 2014 Journal Article,Research Support, Non-U.S. Gov't                                                                                                                                                                                                                                                                                                                                                                            |
| stat3    | akt1   | <a href="http://www.ncbi.nlm.nih.gov/entrez/query.fcgi?cmd=Retrieve&amp;db=pubmed&amp;dopt=Abstract&amp;list_uids=24861878">http://www.ncbi.nlm.nih.gov/entrez/query.fcgi?cmd=Retrieve&amp;db=pubmed&amp;dopt=Abstract&amp;list_uids=24861878</a>  6 Neuro Oncol 16 9 Sep 2014 Journal Article,Research Support, Non-U.S. Gov't                                                                                                                                                                                                                                                                                                                                                                            |
| egfr     | ptk2   | <a href="http://www.ncbi.nlm.nih.gov/entrez/query.fcgi?cmd=Retrieve&amp;db=pubmed&amp;dopt=Abstract&amp;list_uids=24861878">http://www.ncbi.nlm.nih.gov/entrez/query.fcgi?cmd=Retrieve&amp;db=pubmed&amp;dopt=Abstract&amp;list_uids=24861878</a>  6 Neuro Oncol 16 9 Sep 2014 Journal Article,Research Support, Non-U.S. Gov't  <a href="http://www.ncbi.nlm.nih.gov/entrez/query.fcgi?cmd=Retrieve&amp;db=pubmed&amp;dopt=Abstract&amp;list_uids=24091658">http://www.ncbi.nlm.nih.gov/entrez/query.fcgi?cmd=Retrieve&amp;db=pubmed&amp;dopt=Abstract&amp;list_uids=24091658</a>  6 Cell Death Dis 4   2013 Journal Article,Research Support, Non-U.S. Gov't                                             |
| mmrn1    | sfrs16 | <a href="http://www.ncbi.nlm.nih.gov/entrez/query.fcgi?cmd=Retrieve&amp;db=pubmed&amp;dopt=Abstract&amp;list_uids=24859005">http://www.ncbi.nlm.nih.gov/entrez/query.fcgi?cmd=Retrieve&amp;db=pubmed&amp;dopt=Abstract&amp;list_uids=24859005</a>  6 Nat Cell Biol 16 6 Jun 2014 Journal Article,Research Support, N.I.H., Extramural,Research Support, Non-U.S. Gov't,Video-Audio Media                                                                                                                                                                                                                                                                                                                   |
| mmrn1    | phldb2 | <a href="http://www.ncbi.nlm.nih.gov/entrez/query.fcgi?cmd=Retrieve&amp;db=pubmed&amp;dopt=Abstract&amp;list_uids=24859005">http://www.ncbi.nlm.nih.gov/entrez/query.fcgi?cmd=Retrieve&amp;db=pubmed&amp;dopt=Abstract&amp;list_uids=24859005</a>  6 Nat Cell Biol 16 6 Jun 2014 Journal Article,Research Support, N.I.H., Extramural,Research Support, Non-U.S. Gov't,Video-Audio Media                                                                                                                                                                                                                                                                                                                   |
| sfrs16   | phldb2 | <a href="http://www.ncbi.nlm.nih.gov/entrez/query.fcgi?cmd=Retrieve&amp;db=pubmed&amp;dopt=Abstract&amp;list_uids=24859005">http://www.ncbi.nlm.nih.gov/entrez/query.fcgi?cmd=Retrieve&amp;db=pubmed&amp;dopt=Abstract&amp;list_uids=24859005</a>  6 Nat Cell Biol 16 6 Jun 2014 Journal Article,Research Support, N.I.H., Extramural,Research Support, Non-U.S. Gov't,Video-Audio Media                                                                                                                                                                                                                                                                                                                   |
| sfrs16   | fas    | <a href="http://www.ncbi.nlm.nih.gov/entrez/query.fcgi?cmd=Retrieve&amp;db=pubmed&amp;dopt=Abstract&amp;list_uids=24859005">http://www.ncbi.nlm.nih.gov/entrez/query.fcgi?cmd=Retrieve&amp;db=pubmed&amp;dopt=Abstract&amp;list_uids=24859005</a>  6 Nat Cell Biol 16 6 Jun 2014 Journal Article,Research Support, N.I.H., Extramural,Research Support, Non-U.S. Gov't,Video-Audio Media                                                                                                                                                                                                                                                                                                                   |
| arhgef2  | vav2   | <a href="http://www.ncbi.nlm.nih.gov/entrez/query.fcgi?cmd=Retrieve&amp;db=pubmed&amp;dopt=Abstract&amp;list_uids=23615439">http://www.ncbi.nlm.nih.gov/entrez/query.fcgi?cmd=Retrieve&amp;db=pubmed&amp;dopt=Abstract&amp;list_uids=23615439</a>  6 Mol Biol Cell 24 12 Jun 2013 Journal Article,Research Support, N.I.H., Extramural  <a href="http://www.ncbi.nlm.nih.gov/entrez/query.fcgi?cmd=Retrieve&amp;db=pubmed&amp;dopt=Abstract&amp;list_uids=24858039">http://www.ncbi.nlm.nih.gov/entrez/query.fcgi?cmd=Retrieve&amp;db=pubmed&amp;dopt=Abstract&amp;list_uids=24858039</a>  6 Oncogene 34 15 Apr 2015 Journal Article,Research Support, N.I.H., Extramural,Research Support, Non-U.S. Gov't |
| ptk2     | vav2   | <a href="http://www.ncbi.nlm.nih.gov/entrez/query.fcgi?cmd=Retrieve&amp;db=pubmed&amp;dopt=Abstract&amp;list_uids=24858039">http://www.ncbi.nlm.nih.gov/entrez/query.fcgi?cmd=Retrieve&amp;db=pubmed&amp;dopt=Abstract&amp;list_uids=24858039</a>  6 Oncogene 34 15 Apr 2015 Journal Article,Research Support, N.I.H., Extramural,Research Support, Non-U.S. Gov't                                                                                                                                                                                                                                                                                                                                         |
| vav2     | rac1   | <a href="http://www.ncbi.nlm.nih.gov/entrez/query.fcgi?cmd=Retrieve&amp;db=pubmed&amp;dopt=Abstract&amp;list_uids=23615439">http://www.ncbi.nlm.nih.gov/entrez/query.fcgi?cmd=Retrieve&amp;db=pubmed&amp;dopt=Abstract&amp;list_uids=23615439</a>  6 Mol Biol Cell 24 12 Jun 2013 Journal Article,Research Support, N.I.H., Extramural  <a href="http://www.ncbi.nlm.nih.gov/entrez/query.fcgi?cmd=Retrieve&amp;db=pubmed&amp;dopt=Abstract&amp;list_uids=24858039">http://www.ncbi.nlm.nih.gov/entrez/query.fcgi?cmd=Retrieve&amp;db=pubmed&amp;dopt=Abstract&amp;list_uids=24858039</a>  6 Oncogene 34 15 Apr 2015 Journal Article,Research Support, N.I.H., Extramural,Research Support, Non-U.S. Gov't |
| clathrin | clc    | <a href="http://www.ncbi.nlm.nih.gov/entrez/query.fcgi?cmd=Retrieve&amp;db=pubmed&amp;dopt=Abstract&amp;list_uids=24852344">http://www.ncbi.nlm.nih.gov/entrez/query.fcgi?cmd=Retrieve&amp;db=pubmed&amp;dopt=Abstract&amp;list_uids=24852344</a>  6 Nat Commun 5   2014 Journal Article,Research Support, N.I.H., Extramural                                                                                                                                                                                                                                                                                                                                                                              |
| clathrin | actin  | <a href="http://www.ncbi.nlm.nih.gov/entrez/query.fcgi?cmd=Retrieve&amp;db=pubmed&amp;dopt=Abstract&amp;list_uids=24852344">http://www.ncbi.nlm.nih.gov/entrez/query.fcgi?cmd=Retrieve&amp;db=pubmed&amp;dopt=Abstract&amp;list_uids=24852344</a>  6 Nat Commun 5   2014 Journal Article,Research Support, N.I.H., Extramural                                                                                                                                                                                                                                                                                                                                                                              |
| clc      | actin  | <a href="http://www.ncbi.nlm.nih.gov/entrez/query.fcgi?cmd=Retrieve&amp;db=pubmed&amp;dopt=Abstract&amp;list_uids=24852344">http://www.ncbi.nlm.nih.gov/entrez/query.fcgi?cmd=Retrieve&amp;db=pubmed&amp;dopt=Abstract&amp;list_uids=24852344</a>  6 Nat                                                                                                                                                                                                                                                                                                                                                                                                                                                   |

|        |          |                                                                                                                                                                                                                                                                                                                                                                                                             |
|--------|----------|-------------------------------------------------------------------------------------------------------------------------------------------------------------------------------------------------------------------------------------------------------------------------------------------------------------------------------------------------------------------------------------------------------------|
|        |          | Commun 5  2014 Journal Article,Research Support, N.I.H., Extramural                                                                                                                                                                                                                                                                                                                                         |
| abcb1  | clathrin | <a href="http://www.ncbi.nlm.nih.gov/entrez/query.fcgi?cmd=Retrieve&amp;db=pubmed&amp;dopt=Abstract&amp;list_uids=24852344">http://www.ncbi.nlm.nih.gov/entrez/query.fcgi?cmd=Retrieve&amp;db=pubmed&amp;dopt=Abstract&amp;list_uids=24852344</a>  6 Nat Commun 5  2014 Journal Article,Research Support, N.I.H., Extramural                                                                                |
| ptk2   | nf2      | <a href="http://www.ncbi.nlm.nih.gov/entrez/query.fcgi?cmd=Retrieve&amp;db=pubmed&amp;dopt=Abstract&amp;list_uids=24848258">http://www.ncbi.nlm.nih.gov/entrez/query.fcgi?cmd=Retrieve&amp;db=pubmed&amp;dopt=Abstract&amp;list_uids=24848258</a>  6 Sci Transl Med 6 237 May 2014 Journal Article,Research Support, N.I.H., Extramural,Research Support, Non-U.S. Gov't                                    |
| sema3d | sema3e   | <a href="http://www.ncbi.nlm.nih.gov/entrez/query.fcgi?cmd=Retrieve&amp;db=pubmed&amp;dopt=Abstract&amp;list_uids=24825896">http://www.ncbi.nlm.nih.gov/entrez/query.fcgi?cmd=Retrieve&amp;db=pubmed&amp;dopt=Abstract&amp;list_uids=24825896</a>  6 J Biol Chem 289 26 Jun 2014 Journal Article,Research Support, N.I.H., Extramural,Research Support, Non-U.S. Gov't                                      |
| nrp1   | sema3d   | <a href="http://www.ncbi.nlm.nih.gov/entrez/query.fcgi?cmd=Retrieve&amp;db=pubmed&amp;dopt=Abstract&amp;list_uids=24825896">http://www.ncbi.nlm.nih.gov/entrez/query.fcgi?cmd=Retrieve&amp;db=pubmed&amp;dopt=Abstract&amp;list_uids=24825896</a>  6 J Biol Chem 289 26 Jun 2014 Journal Article,Research Support, N.I.H., Extramural,Research Support, Non-U.S. Gov't                                      |
| nrp1   | sema3e   | <a href="http://www.ncbi.nlm.nih.gov/entrez/query.fcgi?cmd=Retrieve&amp;db=pubmed&amp;dopt=Abstract&amp;list_uids=24825896">http://www.ncbi.nlm.nih.gov/entrez/query.fcgi?cmd=Retrieve&amp;db=pubmed&amp;dopt=Abstract&amp;list_uids=24825896</a>  6 J Biol Chem 289 26 Jun 2014 Journal Article,Research Support, N.I.H., Extramural,Research Support, Non-U.S. Gov't                                      |
| plxnd1 | sema3e   | <a href="http://www.ncbi.nlm.nih.gov/entrez/query.fcgi?cmd=Retrieve&amp;db=pubmed&amp;dopt=Abstract&amp;list_uids=24825896">http://www.ncbi.nlm.nih.gov/entrez/query.fcgi?cmd=Retrieve&amp;db=pubmed&amp;dopt=Abstract&amp;list_uids=24825896</a>  6 J Biol Chem 289 26 Jun 2014 Journal Article,Research Support, N.I.H., Extramural,Research Support, Non-U.S. Gov't                                      |
| plxnd1 | sema3d   | <a href="http://www.ncbi.nlm.nih.gov/entrez/query.fcgi?cmd=Retrieve&amp;db=pubmed&amp;dopt=Abstract&amp;list_uids=24825896">http://www.ncbi.nlm.nih.gov/entrez/query.fcgi?cmd=Retrieve&amp;db=pubmed&amp;dopt=Abstract&amp;list_uids=24825896</a>  6 J Biol Chem 289 26 Jun 2014 Journal Article,Research Support, N.I.H., Extramural,Research Support, Non-U.S. Gov't                                      |
| sema3e | akt1     | <a href="http://www.ncbi.nlm.nih.gov/entrez/query.fcgi?cmd=Retrieve&amp;db=pubmed&amp;dopt=Abstract&amp;list_uids=24825896">http://www.ncbi.nlm.nih.gov/entrez/query.fcgi?cmd=Retrieve&amp;db=pubmed&amp;dopt=Abstract&amp;list_uids=24825896</a>  6 J Biol Chem 289 26 Jun 2014 Journal Article,Research Support, N.I.H., Extramural,Research Support, Non-U.S. Gov't                                      |
| sema3e | pik3ca   | <a href="http://www.ncbi.nlm.nih.gov/entrez/query.fcgi?cmd=Retrieve&amp;db=pubmed&amp;dopt=Abstract&amp;list_uids=24825896">http://www.ncbi.nlm.nih.gov/entrez/query.fcgi?cmd=Retrieve&amp;db=pubmed&amp;dopt=Abstract&amp;list_uids=24825896</a>  6 J Biol Chem 289 26 Jun 2014 Journal Article,Research Support, N.I.H., Extramural,Research Support, Non-U.S. Gov't                                      |
| sema3d | akt1     | <a href="http://www.ncbi.nlm.nih.gov/entrez/query.fcgi?cmd=Retrieve&amp;db=pubmed&amp;dopt=Abstract&amp;list_uids=24825896">http://www.ncbi.nlm.nih.gov/entrez/query.fcgi?cmd=Retrieve&amp;db=pubmed&amp;dopt=Abstract&amp;list_uids=24825896</a>  6 J Biol Chem 289 26 Jun 2014 Journal Article,Research Support, N.I.H., Extramural,Research Support, Non-U.S. Gov't                                      |
| sema3d | pik3ca   | <a href="http://www.ncbi.nlm.nih.gov/entrez/query.fcgi?cmd=Retrieve&amp;db=pubmed&amp;dopt=Abstract&amp;list_uids=24825896">http://www.ncbi.nlm.nih.gov/entrez/query.fcgi?cmd=Retrieve&amp;db=pubmed&amp;dopt=Abstract&amp;list_uids=24825896</a>  6 J Biol Chem 289 26 Jun 2014 Journal Article,Research Support, N.I.H., Extramural,Research Support, Non-U.S. Gov't                                      |
| fcn2   | cdk5     | <a href="http://www.ncbi.nlm.nih.gov/entrez/query.fcgi?cmd=Retrieve&amp;db=pubmed&amp;dopt=Abstract&amp;list_uids=24793790">http://www.ncbi.nlm.nih.gov/entrez/query.fcgi?cmd=Retrieve&amp;db=pubmed&amp;dopt=Abstract&amp;list_uids=24793790</a>  6 Oncogene 34 14 Apr 2015 Journal Article,Research Support, N.I.H., Extramural,Research Support, Non-U.S. Gov't,Research Support, U.S. Gov't, Non-P.H.S. |
| cdk5   | axpc1    | <a href="http://www.ncbi.nlm.nih.gov/entrez/query.fcgi?cmd=Retrieve&amp;db=pubmed&amp;dopt=Abstract&amp;list_uids=24793790">http://www.ncbi.nlm.nih.gov/entrez/query.fcgi?cmd=Retrieve&amp;db=pubmed&amp;dopt=Abstract&amp;list_uids=24793790</a>  6 Oncogene 34 14 Apr 2015 Journal Article,Research Support, N.I.H., Extramural,Research Support, Non-U.S. Gov't,Research Support, U.S. Gov't, Non-P.H.S. |
| rac1   | asap1    | <a href="http://www.ncbi.nlm.nih.gov/entrez/query.fcgi?cmd=Retrieve&amp;db=pubmed&amp;dopt=Abstract&amp;list_uids=24788532">http://www.ncbi.nlm.nih.gov/entrez/query.fcgi?cmd=Retrieve&amp;db=pubmed&amp;dopt=Abstract&amp;list_uids=24788532</a>  6 Oncol Rep 31 6 Jun 2014 Journal Article,Research Support, Non-U.S. Gov't                                                                               |
| cdc42  | asap1    | <a href="http://www.ncbi.nlm.nih.gov/entrez/query.fcgi?cmd=Retrieve&amp;db=pubmed&amp;dopt=Abstract&amp;list_uids=24788532">http://www.ncbi.nlm.nih.gov/entrez/query.fcgi?cmd=Retrieve&amp;db=pubmed&amp;dopt=Abstract&amp;list_uids=24788532</a>  6 Oncol Rep 31 6 Jun 2014 Journal Article,Research Support, Non-U.S. Gov't                                                                               |
| psmc6  | arhgef2  | <a href="http://www.ncbi.nlm.nih.gov/entrez/query.fcgi?cmd=Retrieve&amp;db=pubmed&amp;dopt=Abstract&amp;list_uids=24706358">http://www.ncbi.nlm.nih.gov/entrez/query.fcgi?cmd=Retrieve&amp;db=pubmed&amp;dopt=Abstract&amp;list_uids=24706358</a>  6 FASEB J 28 7 Jul 2014 Journal Article,Research Support, N.I.H., Extramural                                                                             |

|        |        |                                                                                                                                                                                                                                                                                                                                                                                                                                                                                                                                                                                                                                                               |
|--------|--------|---------------------------------------------------------------------------------------------------------------------------------------------------------------------------------------------------------------------------------------------------------------------------------------------------------------------------------------------------------------------------------------------------------------------------------------------------------------------------------------------------------------------------------------------------------------------------------------------------------------------------------------------------------------|
| capns1 | mmp2   | <a href="http://www.ncbi.nlm.nih.gov/entrez/query.fcgi?cmd=Retrieve&amp;db=pubmed&amp;dopt=Abstract&amp;list_uids=24703594">http://www.ncbi.nlm.nih.gov/entrez/query.fcgi?cmd=Retrieve&amp;db=pubmed&amp;dopt=Abstract&amp;list_uids=24703594</a>  6 Cancer Sci 105 6 Jun 2014 Journal Article,Research Support, Non-U.S. Gov't                                                                                                                                                                                                                                                                                                                               |
| capns1 | rela   | <a href="http://www.ncbi.nlm.nih.gov/entrez/query.fcgi?cmd=Retrieve&amp;db=pubmed&amp;dopt=Abstract&amp;list_uids=24703594">http://www.ncbi.nlm.nih.gov/entrez/query.fcgi?cmd=Retrieve&amp;db=pubmed&amp;dopt=Abstract&amp;list_uids=24703594</a>  6 Cancer Sci 105 6 Jun 2014 Journal Article,Research Support, Non-U.S. Gov't                                                                                                                                                                                                                                                                                                                               |
| mmp2   | rela   | <a href="http://www.ncbi.nlm.nih.gov/entrez/query.fcgi?cmd=Retrieve&amp;db=pubmed&amp;dopt=Abstract&amp;list_uids=24703594">http://www.ncbi.nlm.nih.gov/entrez/query.fcgi?cmd=Retrieve&amp;db=pubmed&amp;dopt=Abstract&amp;list_uids=24703594</a>  6 Cancer Sci 105 6 Jun 2014 Journal Article,Research Support, Non-U.S. Gov't                                                                                                                                                                                                                                                                                                                               |
| myl2   | pf4    | <a href="http://www.ncbi.nlm.nih.gov/entrez/query.fcgi?cmd=Retrieve&amp;db=pubmed&amp;dopt=Abstract&amp;list_uids=24699667">http://www.ncbi.nlm.nih.gov/entrez/query.fcgi?cmd=Retrieve&amp;db=pubmed&amp;dopt=Abstract&amp;list_uids=24699667</a>  6 PLoS One 9 4  2014 Journal Article,Research Support, Non-U.S. Gov't                                                                                                                                                                                                                                                                                                                                      |
| myl2   | vegfa  | <a href="http://www.ncbi.nlm.nih.gov/entrez/query.fcgi?cmd=Retrieve&amp;db=pubmed&amp;dopt=Abstract&amp;list_uids=24699667">http://www.ncbi.nlm.nih.gov/entrez/query.fcgi?cmd=Retrieve&amp;db=pubmed&amp;dopt=Abstract&amp;list_uids=24699667</a>  6 PLoS One 9 4  2014 Journal Article,Research Support, Non-U.S. Gov't                                                                                                                                                                                                                                                                                                                                      |
| pf4    | vegfa  | <a href="http://www.ncbi.nlm.nih.gov/entrez/query.fcgi?cmd=Retrieve&amp;db=pubmed&amp;dopt=Abstract&amp;list_uids=24699667">http://www.ncbi.nlm.nih.gov/entrez/query.fcgi?cmd=Retrieve&amp;db=pubmed&amp;dopt=Abstract&amp;list_uids=24699667</a>  6 PLoS One 9 4  2014 Journal Article,Research Support, Non-U.S. Gov't                                                                                                                                                                                                                                                                                                                                      |
| pf4    | kdr    | <a href="http://www.ncbi.nlm.nih.gov/entrez/query.fcgi?cmd=Retrieve&amp;db=pubmed&amp;dopt=Abstract&amp;list_uids=24699667">http://www.ncbi.nlm.nih.gov/entrez/query.fcgi?cmd=Retrieve&amp;db=pubmed&amp;dopt=Abstract&amp;list_uids=24699667</a>  6 PLoS One 9 4  2014 Journal Article,Research Support, Non-U.S. Gov't                                                                                                                                                                                                                                                                                                                                      |
| plagl2 | dgcr14 | <a href="http://www.ncbi.nlm.nih.gov/entrez/query.fcgi?cmd=Retrieve&amp;db=pubmed&amp;dopt=Abstract&amp;list_uids=24675530">http://www.ncbi.nlm.nih.gov/entrez/query.fcgi?cmd=Retrieve&amp;db=pubmed&amp;dopt=Abstract&amp;list_uids=24675530</a>  6 Carcinogenesis 35 9 Sep 2014 Journal Article,Research Support, Non-U.S. Gov't                                                                                                                                                                                                                                                                                                                            |
| plagl2 | rhoa   | <a href="http://www.ncbi.nlm.nih.gov/entrez/query.fcgi?cmd=Retrieve&amp;db=pubmed&amp;dopt=Abstract&amp;list_uids=24675530">http://www.ncbi.nlm.nih.gov/entrez/query.fcgi?cmd=Retrieve&amp;db=pubmed&amp;dopt=Abstract&amp;list_uids=24675530</a>  6 Carcinogenesis 35 9 Sep 2014 Journal Article,Research Support, Non-U.S. Gov't                                                                                                                                                                                                                                                                                                                            |
| plagl2 | rac1   | <a href="http://www.ncbi.nlm.nih.gov/entrez/query.fcgi?cmd=Retrieve&amp;db=pubmed&amp;dopt=Abstract&amp;list_uids=24675530">http://www.ncbi.nlm.nih.gov/entrez/query.fcgi?cmd=Retrieve&amp;db=pubmed&amp;dopt=Abstract&amp;list_uids=24675530</a>  6 Carcinogenesis 35 9 Sep 2014 Journal Article,Research Support, Non-U.S. Gov't                                                                                                                                                                                                                                                                                                                            |
| dgcr14 | rhoa   | <a href="http://www.ncbi.nlm.nih.gov/entrez/query.fcgi?cmd=Retrieve&amp;db=pubmed&amp;dopt=Abstract&amp;list_uids=24675530">http://www.ncbi.nlm.nih.gov/entrez/query.fcgi?cmd=Retrieve&amp;db=pubmed&amp;dopt=Abstract&amp;list_uids=24675530</a>  6 Carcinogenesis 35 9 Sep 2014 Journal Article,Research Support, Non-U.S. Gov't                                                                                                                                                                                                                                                                                                                            |
| dgcr14 | rac1   | <a href="http://www.ncbi.nlm.nih.gov/entrez/query.fcgi?cmd=Retrieve&amp;db=pubmed&amp;dopt=Abstract&amp;list_uids=24675530">http://www.ncbi.nlm.nih.gov/entrez/query.fcgi?cmd=Retrieve&amp;db=pubmed&amp;dopt=Abstract&amp;list_uids=24675530</a>  6 Carcinogenesis 35 9 Sep 2014 Journal Article,Research Support, Non-U.S. Gov't                                                                                                                                                                                                                                                                                                                            |
| actin  | plagl2 | <a href="http://www.ncbi.nlm.nih.gov/entrez/query.fcgi?cmd=Retrieve&amp;db=pubmed&amp;dopt=Abstract&amp;list_uids=24675530">http://www.ncbi.nlm.nih.gov/entrez/query.fcgi?cmd=Retrieve&amp;db=pubmed&amp;dopt=Abstract&amp;list_uids=24675530</a>  6 Carcinogenesis 35 9 Sep 2014 Journal Article,Research Support, Non-U.S. Gov't                                                                                                                                                                                                                                                                                                                            |
| chn1   | rac1   | <a href="http://www.ncbi.nlm.nih.gov/entrez/query.fcgi?cmd=Retrieve&amp;db=pubmed&amp;dopt=Abstract&amp;list_uids=24675530">http://www.ncbi.nlm.nih.gov/entrez/query.fcgi?cmd=Retrieve&amp;db=pubmed&amp;dopt=Abstract&amp;list_uids=24675530</a>  6 Carcinogenesis 35 9 Sep 2014 Journal Article,Research Support, Non-U.S. Gov't                                                                                                                                                                                                                                                                                                                            |
| chn1   | plagl2 | <a href="http://www.ncbi.nlm.nih.gov/entrez/query.fcgi?cmd=Retrieve&amp;db=pubmed&amp;dopt=Abstract&amp;list_uids=24675530">http://www.ncbi.nlm.nih.gov/entrez/query.fcgi?cmd=Retrieve&amp;db=pubmed&amp;dopt=Abstract&amp;list_uids=24675530</a>  6 Carcinogenesis 35 9 Sep 2014 Journal Article,Research Support, Non-U.S. Gov't                                                                                                                                                                                                                                                                                                                            |
| fyn    | akt1   | <a href="http://www.ncbi.nlm.nih.gov/entrez/query.fcgi?cmd=Retrieve&amp;db=pubmed&amp;dopt=Abstract&amp;list_uids=24670416">http://www.ncbi.nlm.nih.gov/entrez/query.fcgi?cmd=Retrieve&amp;db=pubmed&amp;dopt=Abstract&amp;list_uids=24670416</a>  6 PLoS One 9 3  2014 Journal Article,Research Support, Non-U.S. Gov't  <a href="http://www.ncbi.nlm.nih.gov/entrez/query.fcgi?cmd=Retrieve&amp;db=pubmed&amp;dopt=Abstract&amp;list_uids=23836527">http://www.ncbi.nlm.nih.gov/entrez/query.fcgi?cmd=Retrieve&amp;db=pubmed&amp;dopt=Abstract&amp;list_uids=23836527</a>  6 Stem Cells 31 11 Nov 2013 Journal Article,Research Support, N.I.H., Extramural |
| fyn    | mapk1  | <a href="http://www.ncbi.nlm.nih.gov/entrez/query.fcgi?cmd=Retrieve&amp;db=pubmed&amp;dopt=Abstract&amp;list_uids=24670416">http://www.ncbi.nlm.nih.gov/entrez/query.fcgi?cmd=Retrieve&amp;db=pubmed&amp;dopt=Abstract&amp;list_uids=24670416</a>  6 PLoS One 9 3  2014 Journal Article,Research Support, Non-U.S. Gov't                                                                                                                                                                                                                                                                                                                                      |



|        |       |                                                                                                                                                                                                                                                                                                                                                                                                                                                                                                                                                                                                                                                                    |
|--------|-------|--------------------------------------------------------------------------------------------------------------------------------------------------------------------------------------------------------------------------------------------------------------------------------------------------------------------------------------------------------------------------------------------------------------------------------------------------------------------------------------------------------------------------------------------------------------------------------------------------------------------------------------------------------------------|
| fyn    | hdac1 | <a href="http://www.ncbi.nlm.nih.gov/entrez/query.fcgi?cmd=Retrieve&amp;db=pubmed&amp;dopt=Abstract&amp;list_uids=24670416">http://www.ncbi.nlm.nih.gov/entrez/query.fcgi?cmd=Retrieve&amp;db=pubmed&amp;dopt=Abstract&amp;list_uids=24670416</a>  6 PLoS One 9 3  2014 Journal Article,Research Support, Non-U.S. Gov't                                                                                                                                                                                                                                                                                                                                           |
| akt1   | mapk1 | <a href="http://www.ncbi.nlm.nih.gov/entrez/query.fcgi?cmd=Retrieve&amp;db=pubmed&amp;dopt=Abstract&amp;list_uids=24670416">http://www.ncbi.nlm.nih.gov/entrez/query.fcgi?cmd=Retrieve&amp;db=pubmed&amp;dopt=Abstract&amp;list_uids=24670416</a>  6 PLoS One 9 3  2014 Journal Article,Research Support, Non-U.S. Gov't                                                                                                                                                                                                                                                                                                                                           |
| akt1   | hdac1 | <a href="http://www.ncbi.nlm.nih.gov/entrez/query.fcgi?cmd=Retrieve&amp;db=pubmed&amp;dopt=Abstract&amp;list_uids=24670416">http://www.ncbi.nlm.nih.gov/entrez/query.fcgi?cmd=Retrieve&amp;db=pubmed&amp;dopt=Abstract&amp;list_uids=24670416</a>  6 PLoS One 9 3  2014 Journal Article,Research Support, Non-U.S. Gov't                                                                                                                                                                                                                                                                                                                                           |
| mapk1  | hdac1 | <a href="http://www.ncbi.nlm.nih.gov/entrez/query.fcgi?cmd=Retrieve&amp;db=pubmed&amp;dopt=Abstract&amp;list_uids=24670416">http://www.ncbi.nlm.nih.gov/entrez/query.fcgi?cmd=Retrieve&amp;db=pubmed&amp;dopt=Abstract&amp;list_uids=24670416</a>  6 PLoS One 9 3  2014 Journal Article,Research Support, Non-U.S. Gov't                                                                                                                                                                                                                                                                                                                                           |
| fas    | bcar1 | <a href="http://www.ncbi.nlm.nih.gov/entrez/query.fcgi?cmd=Retrieve&amp;db=pubmed&amp;dopt=Abstract&amp;list_uids=24642576">http://www.ncbi.nlm.nih.gov/entrez/query.fcgi?cmd=Retrieve&amp;db=pubmed&amp;dopt=Abstract&amp;list_uids=24642576</a>  6 PLoS One 9 3  2014 Journal Article,Research Support, Non-U.S. Gov't  <a href="http://www.ncbi.nlm.nih.gov/entrez/query.fcgi?cmd=Retrieve&amp;db=pubmed&amp;dopt=Abstract&amp;list_uids=24497348">http://www.ncbi.nlm.nih.gov/entrez/query.fcgi?cmd=Retrieve&amp;db=pubmed&amp;dopt=Abstract&amp;list_uids=24497348</a>  6 Cell Biol Int 38 3 Mar 2014 Journal Article,Research Support, Non-U.S. Gov't,Review |
| rnf43  | znrf3 | <a href="http://www.ncbi.nlm.nih.gov/entrez/query.fcgi?cmd=Retrieve&amp;db=pubmed&amp;dopt=Abstract&amp;list_uids=24639526">http://www.ncbi.nlm.nih.gov/entrez/query.fcgi?cmd=Retrieve&amp;db=pubmed&amp;dopt=Abstract&amp;list_uids=24639526</a>  6 Proc Natl Acad Sci U S A 111 13 Apr 2014 Journal Article,Research Support, N.I.H., Extramural,Research Support, Non-U.S. Gov't                                                                                                                                                                                                                                                                                |
| iqgap1 | lgr4  | <a href="http://www.ncbi.nlm.nih.gov/entrez/query.fcgi?cmd=Retrieve&amp;db=pubmed&amp;dopt=Abstract&amp;list_uids=24639526">http://www.ncbi.nlm.nih.gov/entrez/query.fcgi?cmd=Retrieve&amp;db=pubmed&amp;dopt=Abstract&amp;list_uids=24639526</a>  6 Proc Natl Acad Sci U S A 111 13 Apr 2014 Journal Article,Research Support, N.I.H., Extramural,Research Support, Non-U.S. Gov't                                                                                                                                                                                                                                                                                |
| iqgap1 | sgsm3 | <a href="http://www.ncbi.nlm.nih.gov/entrez/query.fcgi?cmd=Retrieve&amp;db=pubmed&amp;dopt=Abstract&amp;list_uids=24639526">http://www.ncbi.nlm.nih.gov/entrez/query.fcgi?cmd=Retrieve&amp;db=pubmed&amp;dopt=Abstract&amp;list_uids=24639526</a>  6 Proc Natl Acad Sci U S A 111 13 Apr 2014 Journal Article,Research Support, N.I.H., Extramural,Research Support, Non-U.S. Gov't                                                                                                                                                                                                                                                                                |
| map2k1 | lrp5  | <a href="http://www.ncbi.nlm.nih.gov/entrez/query.fcgi?cmd=Retrieve&amp;db=pubmed&amp;dopt=Abstract&amp;list_uids=24639526">http://www.ncbi.nlm.nih.gov/entrez/query.fcgi?cmd=Retrieve&amp;db=pubmed&amp;dopt=Abstract&amp;list_uids=24639526</a>  6 Proc Natl Acad Sci U S A 111 13 Apr 2014 Journal Article,Research Support, N.I.H., Extramural,Research Support, Non-U.S. Gov't                                                                                                                                                                                                                                                                                |
| map2k1 | actin | <a href="http://www.ncbi.nlm.nih.gov/entrez/query.fcgi?cmd=Retrieve&amp;db=pubmed&amp;dopt=Abstract&amp;list_uids=24639526">http://www.ncbi.nlm.nih.gov/entrez/query.fcgi?cmd=Retrieve&amp;db=pubmed&amp;dopt=Abstract&amp;list_uids=24639526</a>  6 Proc Natl Acad Sci U S A 111 13 Apr 2014 Journal Article,Research Support, N.I.H., Extramural,Research Support, Non-U.S. Gov't                                                                                                                                                                                                                                                                                |
| lrp5   | actin | <a href="http://www.ncbi.nlm.nih.gov/entrez/query.fcgi?cmd=Retrieve&amp;db=pubmed&amp;dopt=Abstract&amp;list_uids=24639526">http://www.ncbi.nlm.nih.gov/entrez/query.fcgi?cmd=Retrieve&amp;db=pubmed&amp;dopt=Abstract&amp;list_uids=24639526</a>  6 Proc Natl Acad Sci U S A 111 13 Apr 2014 Journal Article,Research Support, N.I.H., Extramural,Research Support, Non-U.S. Gov't                                                                                                                                                                                                                                                                                |
| timp1  | cd63  | <a href="http://www.ncbi.nlm.nih.gov/entrez/query.fcgi?cmd=Retrieve&amp;db=pubmed&amp;dopt=Abstract&amp;list_uids=24635319">http://www.ncbi.nlm.nih.gov/entrez/query.fcgi?cmd=Retrieve&amp;db=pubmed&amp;dopt=Abstract&amp;list_uids=24635319</a>  6 Biochem J 459 3 May 2014 Journal Article,Research Support, Non-U.S. Gov't                                                                                                                                                                                                                                                                                                                                     |
| timp1  | akt1  | <a href="http://www.ncbi.nlm.nih.gov/entrez/query.fcgi?cmd=Retrieve&amp;db=pubmed&amp;dopt=Abstract&amp;list_uids=24635319">http://www.ncbi.nlm.nih.gov/entrez/query.fcgi?cmd=Retrieve&amp;db=pubmed&amp;dopt=Abstract&amp;list_uids=24635319</a>  6 Biochem J 459 3 May 2014 Journal Article,Research Support, Non-U.S. Gov't                                                                                                                                                                                                                                                                                                                                     |
| timp1  | ptk2  | <a href="http://www.ncbi.nlm.nih.gov/entrez/query.fcgi?cmd=Retrieve&amp;db=pubmed&amp;dopt=Abstract&amp;list_uids=24635319">http://www.ncbi.nlm.nih.gov/entrez/query.fcgi?cmd=Retrieve&amp;db=pubmed&amp;dopt=Abstract&amp;list_uids=24635319</a>  6 Biochem J 459 3 May 2014 Journal Article,Research Support, Non-U.S. Gov't                                                                                                                                                                                                                                                                                                                                     |
| timp1  | actin | <a href="http://www.ncbi.nlm.nih.gov/entrez/query.fcgi?cmd=Retrieve&amp;db=pubmed&amp;dopt=Abstract&amp;list_uids=24635319">http://www.ncbi.nlm.nih.gov/entrez/query.fcgi?cmd=Retrieve&amp;db=pubmed&amp;dopt=Abstract&amp;list_uids=24635319</a>  6 Biochem J 459 3 May 2014 Journal Article,Research Support, Non-U.S. Gov't                                                                                                                                                                                                                                                                                                                                     |
| cd63   | akt1  | <a href="http://www.ncbi.nlm.nih.gov/entrez/query.fcgi?cmd=Retrieve&amp;db=pubmed&amp;dopt=Abstract&amp;list_uids=24635319">http://www.ncbi.nlm.nih.gov/entrez/query.fcgi?cmd=Retrieve&amp;db=pubmed&amp;dopt=Abstract&amp;list_uids=24635319</a>  6 Biochem J 459 3 May 2014 Journal Article,Research Support, Non-U.S. Gov't                                                                                                                                                                                                                                                                                                                                     |
| cd63   | ptk2  | <a href="http://www.ncbi.nlm.nih.gov/entrez/query.fcgi?cmd=Retrieve&amp;db=pubmed&amp;dopt=Abstract&amp;list_uids=24635319">http://www.ncbi.nlm.nih.gov/entrez/query.fcgi?cmd=Retrieve&amp;db=pubmed&amp;dopt=Abstract&amp;list_uids=24635319</a>  6 Biochem J 459 3 May 2014 Journal Article,Research Support, Non-U.S. Gov't                                                                                                                                                                                                                                                                                                                                     |

|         |       |                                                                                                                                                                                                                                                                                                                                                                                                                                                                                                                                                                                                                                                                                                                                                                                                                                                                                                                                                                                             |
|---------|-------|---------------------------------------------------------------------------------------------------------------------------------------------------------------------------------------------------------------------------------------------------------------------------------------------------------------------------------------------------------------------------------------------------------------------------------------------------------------------------------------------------------------------------------------------------------------------------------------------------------------------------------------------------------------------------------------------------------------------------------------------------------------------------------------------------------------------------------------------------------------------------------------------------------------------------------------------------------------------------------------------|
| cd63    | actin | <a href="http://www.ncbi.nlm.nih.gov/entrez/query.fcgi?cmd=Retrieve&amp;db=pubmed&amp;dopt=Abstract&amp;list_uids=24635319">http://www.ncbi.nlm.nih.gov/entrez/query.fcgi?cmd=Retrieve&amp;db=pubmed&amp;dopt=Abstract&amp;list_uids=24635319</a> [6]Biochem J[459]3 May 2014 Journal Article,Research Support, Non-U.S. Gov't                                                                                                                                                                                                                                                                                                                                                                                                                                                                                                                                                                                                                                                              |
| pik3ca  | timp1 | <a href="http://www.ncbi.nlm.nih.gov/entrez/query.fcgi?cmd=Retrieve&amp;db=pubmed&amp;dopt=Abstract&amp;list_uids=24635319">http://www.ncbi.nlm.nih.gov/entrez/query.fcgi?cmd=Retrieve&amp;db=pubmed&amp;dopt=Abstract&amp;list_uids=24635319</a> [6]Biochem J[459]3 May 2014 Journal Article,Research Support, Non-U.S. Gov't                                                                                                                                                                                                                                                                                                                                                                                                                                                                                                                                                                                                                                                              |
| cdgap   | rac1  | <a href="http://www.ncbi.nlm.nih.gov/entrez/query.fcgi?cmd=Retrieve&amp;db=pubmed&amp;dopt=Abstract&amp;list_uids=24632816">http://www.ncbi.nlm.nih.gov/entrez/query.fcgi?cmd=Retrieve&amp;db=pubmed&amp;dopt=Abstract&amp;list_uids=24632816</a> [6]PLoS One[9]3  2014 Journal Article,Research Support, Non-U.S. Gov't                                                                                                                                                                                                                                                                                                                                                                                                                                                                                                                                                                                                                                                                    |
| cdgap   | cdc42 | <a href="http://www.ncbi.nlm.nih.gov/entrez/query.fcgi?cmd=Retrieve&amp;db=pubmed&amp;dopt=Abstract&amp;list_uids=24632816">http://www.ncbi.nlm.nih.gov/entrez/query.fcgi?cmd=Retrieve&amp;db=pubmed&amp;dopt=Abstract&amp;list_uids=24632816</a> [6]PLoS One[9]3  2014 Journal Article,Research Support, Non-U.S. Gov't                                                                                                                                                                                                                                                                                                                                                                                                                                                                                                                                                                                                                                                                    |
| tmeff2  | rhoa  | <a href="http://www.ncbi.nlm.nih.gov/entrez/query.fcgi?cmd=Retrieve&amp;db=pubmed&amp;dopt=Abstract&amp;list_uids=24632071">http://www.ncbi.nlm.nih.gov/entrez/query.fcgi?cmd=Retrieve&amp;db=pubmed&amp;dopt=Abstract&amp;list_uids=24632071</a> [6]Biochim Biophys Acta[1843]6 Jun 2014 Journal Article,Research Support, N.I.H., Extramural                                                                                                                                                                                                                                                                                                                                                                                                                                                                                                                                                                                                                                              |
| 3.6.4.1 | rock2 | <a href="http://www.ncbi.nlm.nih.gov/entrez/query.fcgi?cmd=Retrieve&amp;db=pubmed&amp;dopt=Abstract&amp;list_uids=24610576">http://www.ncbi.nlm.nih.gov/entrez/query.fcgi?cmd=Retrieve&amp;db=pubmed&amp;dopt=Abstract&amp;list_uids=24610576</a> [6]J Cell Biochem[115]9 Sep 2014 Journal Article,Research Support, Non-U.S. Gov't                                                                                                                                                                                                                                                                                                                                                                                                                                                                                                                                                                                                                                                         |
| ptger2  | mlc1  | <a href="http://www.ncbi.nlm.nih.gov/entrez/query.fcgi?cmd=Retrieve&amp;db=pubmed&amp;dopt=Abstract&amp;list_uids=24610576">http://www.ncbi.nlm.nih.gov/entrez/query.fcgi?cmd=Retrieve&amp;db=pubmed&amp;dopt=Abstract&amp;list_uids=24610576</a> [6]J Cell Biochem[115]9 Sep 2014 Journal Article,Research Support, Non-U.S. Gov't                                                                                                                                                                                                                                                                                                                                                                                                                                                                                                                                                                                                                                                         |
| fzd4    | rock2 | <a href="http://www.ncbi.nlm.nih.gov/entrez/query.fcgi?cmd=Retrieve&amp;db=pubmed&amp;dopt=Abstract&amp;list_uids=24610576">http://www.ncbi.nlm.nih.gov/entrez/query.fcgi?cmd=Retrieve&amp;db=pubmed&amp;dopt=Abstract&amp;list_uids=24610576</a> [6]J Cell Biochem[115]9 Sep 2014 Journal Article,Research Support, Non-U.S. Gov't                                                                                                                                                                                                                                                                                                                                                                                                                                                                                                                                                                                                                                                         |
| rock2   | mlc1  | <a href="http://www.ncbi.nlm.nih.gov/entrez/query.fcgi?cmd=Retrieve&amp;db=pubmed&amp;dopt=Abstract&amp;list_uids=24610576">http://www.ncbi.nlm.nih.gov/entrez/query.fcgi?cmd=Retrieve&amp;db=pubmed&amp;dopt=Abstract&amp;list_uids=24610576</a> [6]J Cell Biochem[115]9 Sep 2014 Journal Article,Research Support, Non-U.S. Gov't                                                                                                                                                                                                                                                                                                                                                                                                                                                                                                                                                                                                                                                         |
| ptk2    | kcnk2 | <a href="http://www.ncbi.nlm.nih.gov/entrez/query.fcgi?cmd=Retrieve&amp;db=pubmed&amp;dopt=Abstract&amp;list_uids=24586773">http://www.ncbi.nlm.nih.gov/entrez/query.fcgi?cmd=Retrieve&amp;db=pubmed&amp;dopt=Abstract&amp;list_uids=24586773</a> [6]PLoS One[9]2  2014 Journal Article,Research Support, N.I.H., Extramural,Research Support, Non-U.S. Gov't                                                                                                                                                                                                                                                                                                                                                                                                                                                                                                                                                                                                                               |
| tyr     | kcnk2 | <a href="http://www.ncbi.nlm.nih.gov/entrez/query.fcgi?cmd=Retrieve&amp;db=pubmed&amp;dopt=Abstract&amp;list_uids=24586773">http://www.ncbi.nlm.nih.gov/entrez/query.fcgi?cmd=Retrieve&amp;db=pubmed&amp;dopt=Abstract&amp;list_uids=24586773</a> [6]PLoS One[9]2  2014 Journal Article,Research Support, N.I.H., Extramural,Research Support, Non-U.S. Gov't                                                                                                                                                                                                                                                                                                                                                                                                                                                                                                                                                                                                                               |
| inpp1   | tyr   | <a href="http://www.ncbi.nlm.nih.gov/entrez/query.fcgi?cmd=Retrieve&amp;db=pubmed&amp;dopt=Abstract&amp;list_uids=24561238">http://www.ncbi.nlm.nih.gov/entrez/query.fcgi?cmd=Retrieve&amp;db=pubmed&amp;dopt=Abstract&amp;list_uids=24561238</a> [6]Cell Signal[26]6 Jun 2014 Journal Article,Research Support, Non-U.S. Gov't                                                                                                                                                                                                                                                                                                                                                                                                                                                                                                                                                                                                                                                             |
| arf5    | arf6  | <a href="http://www.ncbi.nlm.nih.gov/entrez/query.fcgi?cmd=Retrieve&amp;db=pubmed&amp;dopt=Abstract&amp;list_uids=24522833">http://www.ncbi.nlm.nih.gov/entrez/query.fcgi?cmd=Retrieve&amp;db=pubmed&amp;dopt=Abstract&amp;list_uids=24522833</a> [6]Basic Res Cardiol[109]2 Mar 2014 Journal Article,Research Support, N.I.H., Intramural,Research Support, Non-U.S. Gov't                                                                                                                                                                                                                                                                                                                                                                                                                                                                                                                                                                                                                 |
| egf     | actin | <a href="http://www.ncbi.nlm.nih.gov/entrez/query.fcgi?cmd=Retrieve&amp;db=pubmed&amp;dopt=Abstract&amp;list_uids=24505297">http://www.ncbi.nlm.nih.gov/entrez/query.fcgi?cmd=Retrieve&amp;db=pubmed&amp;dopt=Abstract&amp;list_uids=24505297</a> [6]PLoS One[9]2  2014 Journal Article,Research Support, Non-U.S. Gov't <a href="http://www.ncbi.nlm.nih.gov/entrez/query.fcgi?cmd=Retrieve&amp;db=pubmed&amp;dopt=Abstract&amp;list_uids=23023326">http://www.ncbi.nlm.nih.gov/entrez/query.fcgi?cmd=Retrieve&amp;db=pubmed&amp;dopt=Abstract&amp;list_uids=23023326</a> [6]Int J Oncol[41]6 Dec 2012 Journal Article,Research Support, Non-U.S. Gov't <a href="http://www.ncbi.nlm.nih.gov/entrez/query.fcgi?cmd=Retrieve&amp;db=pubmed&amp;dopt=Abstract&amp;list_uids=22357970">http://www.ncbi.nlm.nih.gov/entrez/query.fcgi?cmd=Retrieve&amp;db=pubmed&amp;dopt=Abstract&amp;list_uids=22357970</a> [6]J Cell Sci[125]Pt 2 Jan 2012 Journal Article,Research Support, Non-U.S. Gov't |
| egfr    | actin | <a href="http://www.ncbi.nlm.nih.gov/entrez/query.fcgi?cmd=Retrieve&amp;db=pubmed&amp;dopt=Abstract&amp;list_uids=24505297">http://www.ncbi.nlm.nih.gov/entrez/query.fcgi?cmd=Retrieve&amp;db=pubmed&amp;dopt=Abstract&amp;list_uids=24505297</a> [6]PLoS One[9]2  2014 Journal Article,Research Support, Non-U.S. Gov't                                                                                                                                                                                                                                                                                                                                                                                                                                                                                                                                                                                                                                                                    |
| igfbp3  | thbs1 | <a href="http://www.ncbi.nlm.nih.gov/entrez/query.fcgi?cmd=Retrieve&amp;db=pubmed&amp;dopt=Abstract&amp;list_uids=24497940">http://www.ncbi.nlm.nih.gov/entrez/query.fcgi?cmd=Retrieve&amp;db=pubmed&amp;dopt=Abstract&amp;list_uids=24497940</a> [6]PLoS One[9]1  2014 Journal Article,Research Support, N.I.H., Extramural                                                                                                                                                                                                                                                                                                                                                                                                                                                                                                                                                                                                                                                                |

|           |           |                                                                                                                                                                                                                                                                                                                                                                                      |
|-----------|-----------|--------------------------------------------------------------------------------------------------------------------------------------------------------------------------------------------------------------------------------------------------------------------------------------------------------------------------------------------------------------------------------------|
| duoxa1    | bcar1     | <a href="http://www.ncbi.nlm.nih.gov/entrez/query.fcgi?cmd=Retrieve&amp;db=pubmed&amp;dopt=Abstract&amp;list_uids=24497348">http://www.ncbi.nlm.nih.gov/entrez/query.fcgi?cmd=Retrieve&amp;db=pubmed&amp;dopt=Abstract&amp;list_uids=24497348</a>  6 Cell Biol Int 38 3 Mar 2014 Journal Article,Research Support, Non-U.S. Gov't,Review                                             |
| duoxa1    | fas       | <a href="http://www.ncbi.nlm.nih.gov/entrez/query.fcgi?cmd=Retrieve&amp;db=pubmed&amp;dopt=Abstract&amp;list_uids=24497348">http://www.ncbi.nlm.nih.gov/entrez/query.fcgi?cmd=Retrieve&amp;db=pubmed&amp;dopt=Abstract&amp;list_uids=24497348</a>  6 Cell Biol Int 38 3 Mar 2014 Journal Article,Research Support, Non-U.S. Gov't,Review                                             |
| map3k2    | mapk7     | <a href="http://www.ncbi.nlm.nih.gov/entrez/query.fcgi?cmd=Retrieve&amp;db=pubmed&amp;dopt=Abstract&amp;list_uids=24491810">http://www.ncbi.nlm.nih.gov/entrez/query.fcgi?cmd=Retrieve&amp;db=pubmed&amp;dopt=Abstract&amp;list_uids=24491810</a>  6 Biochim Biophys Acta 1843 5 May 2014 Journal Article,Research Support, N.I.H., Extramural,Research Support, Non-U.S. Gov't      |
| map3k2    | ptk2      | <a href="http://www.ncbi.nlm.nih.gov/entrez/query.fcgi?cmd=Retrieve&amp;db=pubmed&amp;dopt=Abstract&amp;list_uids=24491810">http://www.ncbi.nlm.nih.gov/entrez/query.fcgi?cmd=Retrieve&amp;db=pubmed&amp;dopt=Abstract&amp;list_uids=24491810</a>  6 Biochim Biophys Acta 1843 5 May 2014 Journal Article,Research Support, N.I.H., Extramural,Research Support, Non-U.S. Gov't      |
| mapk7     | ptk2      | <a href="http://www.ncbi.nlm.nih.gov/entrez/query.fcgi?cmd=Retrieve&amp;db=pubmed&amp;dopt=Abstract&amp;list_uids=24491810">http://www.ncbi.nlm.nih.gov/entrez/query.fcgi?cmd=Retrieve&amp;db=pubmed&amp;dopt=Abstract&amp;list_uids=24491810</a>  6 Biochim Biophys Acta 1843 5 May 2014 Journal Article,Research Support, N.I.H., Extramural,Research Support, Non-U.S. Gov't      |
| ola1      | ptk2      | <a href="http://www.ncbi.nlm.nih.gov/entrez/query.fcgi?cmd=Retrieve&amp;db=pubmed&amp;dopt=Abstract&amp;list_uids=24486488">http://www.ncbi.nlm.nih.gov/entrez/query.fcgi?cmd=Retrieve&amp;db=pubmed&amp;dopt=Abstract&amp;list_uids=24486488</a>  6 Biochem Biophys Res Commun 444 4 Feb 2014 Journal Article,Research Support, N.I.H., Extramural,Research Support, Non-U.S. Gov't |
| ola1      | actin     | <a href="http://www.ncbi.nlm.nih.gov/entrez/query.fcgi?cmd=Retrieve&amp;db=pubmed&amp;dopt=Abstract&amp;list_uids=24486488">http://www.ncbi.nlm.nih.gov/entrez/query.fcgi?cmd=Retrieve&amp;db=pubmed&amp;dopt=Abstract&amp;list_uids=24486488</a>  6 Biochem Biophys Res Commun 444 4 Feb 2014 Journal Article,Research Support, N.I.H., Extramural,Research Support, Non-U.S. Gov't |
| cdc42b pa | tnfsf13   | <a href="http://www.ncbi.nlm.nih.gov/entrez/query.fcgi?cmd=Retrieve&amp;db=pubmed&amp;dopt=Abstract&amp;list_uids=24486483">http://www.ncbi.nlm.nih.gov/entrez/query.fcgi?cmd=Retrieve&amp;db=pubmed&amp;dopt=Abstract&amp;list_uids=24486483</a>  6 Eur J Pharm Sci 55 May 2014 Journal Article,Research Support, Non-U.S. Gov't                                                    |
| dag1      | pkc       | <a href="http://www.ncbi.nlm.nih.gov/entrez/query.fcgi?cmd=Retrieve&amp;db=pubmed&amp;dopt=Abstract&amp;list_uids=24486483">http://www.ncbi.nlm.nih.gov/entrez/query.fcgi?cmd=Retrieve&amp;db=pubmed&amp;dopt=Abstract&amp;list_uids=24486483</a>  6 Eur J Pharm Sci 55 May 2014 Journal Article,Research Support, Non-U.S. Gov't                                                    |
| prkd1     | cdc42     | <a href="http://www.ncbi.nlm.nih.gov/entrez/query.fcgi?cmd=Retrieve&amp;db=pubmed&amp;dopt=Abstract&amp;list_uids=24486483">http://www.ncbi.nlm.nih.gov/entrez/query.fcgi?cmd=Retrieve&amp;db=pubmed&amp;dopt=Abstract&amp;list_uids=24486483</a>  6 Eur J Pharm Sci 55 May 2014 Journal Article,Research Support, Non-U.S. Gov't                                                    |
| prkd1     | cdc42b pa | <a href="http://www.ncbi.nlm.nih.gov/entrez/query.fcgi?cmd=Retrieve&amp;db=pubmed&amp;dopt=Abstract&amp;list_uids=24486483">http://www.ncbi.nlm.nih.gov/entrez/query.fcgi?cmd=Retrieve&amp;db=pubmed&amp;dopt=Abstract&amp;list_uids=24486483</a>  6 Eur J Pharm Sci 55 May 2014 Journal Article,Research Support, Non-U.S. Gov't                                                    |
| cdc42     | cdc42b pa | <a href="http://www.ncbi.nlm.nih.gov/entrez/query.fcgi?cmd=Retrieve&amp;db=pubmed&amp;dopt=Abstract&amp;list_uids=24486483">http://www.ncbi.nlm.nih.gov/entrez/query.fcgi?cmd=Retrieve&amp;db=pubmed&amp;dopt=Abstract&amp;list_uids=24486483</a>  6 Eur J Pharm Sci 55 May 2014 Journal Article,Research Support, Non-U.S. Gov't                                                    |
| src       | micall1   | <a href="http://www.ncbi.nlm.nih.gov/entrez/query.fcgi?cmd=Retrieve&amp;db=pubmed&amp;dopt=Abstract&amp;list_uids=24481818">http://www.ncbi.nlm.nih.gov/entrez/query.fcgi?cmd=Retrieve&amp;db=pubmed&amp;dopt=Abstract&amp;list_uids=24481818</a>  6 J Cell Sci 127 Pt 8 Apr 2014 Journal Article,Research Support, N.I.H., Extramural,Research Support, Non-U.S. Gov't              |
| src       | ehd1      | <a href="http://www.ncbi.nlm.nih.gov/entrez/query.fcgi?cmd=Retrieve&amp;db=pubmed&amp;dopt=Abstract&amp;list_uids=24481818">http://www.ncbi.nlm.nih.gov/entrez/query.fcgi?cmd=Retrieve&amp;db=pubmed&amp;dopt=Abstract&amp;list_uids=24481818</a>  6 J Cell Sci 127 Pt 8 Apr 2014 Journal Article,Research Support, N.I.H., Extramural,Research Support, Non-U.S. Gov't              |
| micall1   | ehd1      | <a href="http://www.ncbi.nlm.nih.gov/entrez/query.fcgi?cmd=Retrieve&amp;db=pubmed&amp;dopt=Abstract&amp;list_uids=24481818">http://www.ncbi.nlm.nih.gov/entrez/query.fcgi?cmd=Retrieve&amp;db=pubmed&amp;dopt=Abstract&amp;list_uids=24481818</a>  6 J Cell Sci 127 Pt 8 Apr 2014 Journal Article,Research Support, N.I.H., Extramural,Research Support, Non-U.S. Gov't              |
| fbln7     | actin     | <a href="http://www.ncbi.nlm.nih.gov/entrez/query.fcgi?cmd=Retrieve&amp;db=pubmed&amp;dopt=Abstract&amp;list_uids=24480309">http://www.ncbi.nlm.nih.gov/entrez/query.fcgi?cmd=Retrieve&amp;db=pubmed&amp;dopt=Abstract&amp;list_uids=24480309</a>  6 Arch Biochem Biophys 545 Mar 2014 Journal Article,Research Support, Non-U.S. Gov't                                              |
| rhoa      | irs1      | <a href="http://www.ncbi.nlm.nih.gov/entrez/query.fcgi?cmd=Retrieve&amp;db=pubmed&amp;dopt=Abstract&amp;list_uids=24470116">http://www.ncbi.nlm.nih.gov/entrez/query.fcgi?cmd=Retrieve&amp;db=pubmed&amp;dopt=Abstract&amp;list_uids=24470116</a>  6 Cell Mol Biol Lett 19 1 Mar 2014 Journal Article,Research Support, Non-U.S. Gov't                                               |

|         |        |                                                                                                                                                                                                                                                                                                                                                                                                                                                                                                                                                                                                                                                              |
|---------|--------|--------------------------------------------------------------------------------------------------------------------------------------------------------------------------------------------------------------------------------------------------------------------------------------------------------------------------------------------------------------------------------------------------------------------------------------------------------------------------------------------------------------------------------------------------------------------------------------------------------------------------------------------------------------|
| smad2   | sgsm3  | <a href="http://www.ncbi.nlm.nih.gov/entrez/query.fcgi?cmd=Retrieve&amp;db=pubmed&amp;dopt=Abstract&amp;list_uids=24466271">http://www.ncbi.nlm.nih.gov/entrez/query.fcgi?cmd=Retrieve&amp;db=pubmed&amp;dopt=Abstract&amp;list_uids=24466271</a>  6 PLoS One 9 1  2014 Journal Article,Research Support, N.I.H., Extramural,Research Support, Non-U.S. Gov't                                                                                                                                                                                                                                                                                                |
| smad2   | fgf2   | <a href="http://www.ncbi.nlm.nih.gov/entrez/query.fcgi?cmd=Retrieve&amp;db=pubmed&amp;dopt=Abstract&amp;list_uids=24466271">http://www.ncbi.nlm.nih.gov/entrez/query.fcgi?cmd=Retrieve&amp;db=pubmed&amp;dopt=Abstract&amp;list_uids=24466271</a>  6 PLoS One 9 1  2014 Journal Article,Research Support, N.I.H., Extramural,Research Support, Non-U.S. Gov't                                                                                                                                                                                                                                                                                                |
| sgsm3   | fgf2   | <a href="http://www.ncbi.nlm.nih.gov/entrez/query.fcgi?cmd=Retrieve&amp;db=pubmed&amp;dopt=Abstract&amp;list_uids=24466271">http://www.ncbi.nlm.nih.gov/entrez/query.fcgi?cmd=Retrieve&amp;db=pubmed&amp;dopt=Abstract&amp;list_uids=24466271</a>  6 PLoS One 9 1  2014 Journal Article,Research Support, N.I.H., Extramural,Research Support, Non-U.S. Gov't                                                                                                                                                                                                                                                                                                |
| ilk     | pkb    | <a href="http://www.ncbi.nlm.nih.gov/entrez/query.fcgi?cmd=Retrieve&amp;db=pubmed&amp;dopt=Abstract&amp;list_uids=24466237">http://www.ncbi.nlm.nih.gov/entrez/query.fcgi?cmd=Retrieve&amp;db=pubmed&amp;dopt=Abstract&amp;list_uids=24466237</a>  6 PLoS One 9 1  2014 Journal Article,Research Support, Non-U.S. Gov't                                                                                                                                                                                                                                                                                                                                     |
| ilk     | akt1   | <a href="http://www.ncbi.nlm.nih.gov/entrez/query.fcgi?cmd=Retrieve&amp;db=pubmed&amp;dopt=Abstract&amp;list_uids=24466237">http://www.ncbi.nlm.nih.gov/entrez/query.fcgi?cmd=Retrieve&amp;db=pubmed&amp;dopt=Abstract&amp;list_uids=24466237</a>  6 PLoS One 9 1  2014 Journal Article,Research Support, Non-U.S. Gov't  <a href="http://www.ncbi.nlm.nih.gov/entrez/query.fcgi?cmd=Retrieve&amp;db=pubmed&amp;dopt=Abstract&amp;list_uids=22767580">http://www.ncbi.nlm.nih.gov/entrez/query.fcgi?cmd=Retrieve&amp;db=pubmed&amp;dopt=Abstract&amp;list_uids=22767580</a>  6 Mol Biol Cell 23 17 Sep 2012 Journal Article,Research Support, Non-U.S. Gov't |
| ilk     | mmp9   | <a href="http://www.ncbi.nlm.nih.gov/entrez/query.fcgi?cmd=Retrieve&amp;db=pubmed&amp;dopt=Abstract&amp;list_uids=24466237">http://www.ncbi.nlm.nih.gov/entrez/query.fcgi?cmd=Retrieve&amp;db=pubmed&amp;dopt=Abstract&amp;list_uids=24466237</a>  6 PLoS One 9 1  2014 Journal Article,Research Support, Non-U.S. Gov't                                                                                                                                                                                                                                                                                                                                     |
| pkb     | akt1   | <a href="http://www.ncbi.nlm.nih.gov/entrez/query.fcgi?cmd=Retrieve&amp;db=pubmed&amp;dopt=Abstract&amp;list_uids=24466237">http://www.ncbi.nlm.nih.gov/entrez/query.fcgi?cmd=Retrieve&amp;db=pubmed&amp;dopt=Abstract&amp;list_uids=24466237</a>  6 PLoS One 9 1  2014 Journal Article,Research Support, Non-U.S. Gov't                                                                                                                                                                                                                                                                                                                                     |
| pkb     | mmp9   | <a href="http://www.ncbi.nlm.nih.gov/entrez/query.fcgi?cmd=Retrieve&amp;db=pubmed&amp;dopt=Abstract&amp;list_uids=24466237">http://www.ncbi.nlm.nih.gov/entrez/query.fcgi?cmd=Retrieve&amp;db=pubmed&amp;dopt=Abstract&amp;list_uids=24466237</a>  6 PLoS One 9 1  2014 Journal Article,Research Support, Non-U.S. Gov't                                                                                                                                                                                                                                                                                                                                     |
| akt1    | mmp9   | <a href="http://www.ncbi.nlm.nih.gov/entrez/query.fcgi?cmd=Retrieve&amp;db=pubmed&amp;dopt=Abstract&amp;list_uids=24466237">http://www.ncbi.nlm.nih.gov/entrez/query.fcgi?cmd=Retrieve&amp;db=pubmed&amp;dopt=Abstract&amp;list_uids=24466237</a>  6 PLoS One 9 1  2014 Journal Article,Research Support, Non-U.S. Gov't                                                                                                                                                                                                                                                                                                                                     |
| mmp9    | fos    | <a href="http://www.ncbi.nlm.nih.gov/entrez/query.fcgi?cmd=Retrieve&amp;db=pubmed&amp;dopt=Abstract&amp;list_uids=24466237">http://www.ncbi.nlm.nih.gov/entrez/query.fcgi?cmd=Retrieve&amp;db=pubmed&amp;dopt=Abstract&amp;list_uids=24466237</a>  6 PLoS One 9 1  2014 Journal Article,Research Support, Non-U.S. Gov't                                                                                                                                                                                                                                                                                                                                     |
| mapk3   | akt1   | <a href="http://www.ncbi.nlm.nih.gov/entrez/query.fcgi?cmd=Retrieve&amp;db=pubmed&amp;dopt=Abstract&amp;list_uids=24463198">http://www.ncbi.nlm.nih.gov/entrez/query.fcgi?cmd=Retrieve&amp;db=pubmed&amp;dopt=Abstract&amp;list_uids=24463198</a>  6 Chem Biol Interact 211  Mar 2014 Journal Article,Review  <a href="http://www.ncbi.nlm.nih.gov/entrez/query.fcgi?cmd=Retrieve&amp;db=pubmed&amp;dopt=Abstract&amp;list_uids=23562553">http://www.ncbi.nlm.nih.gov/entrez/query.fcgi?cmd=Retrieve&amp;db=pubmed&amp;dopt=Abstract&amp;list_uids=23562553</a>  6 Biochim Biophys Acta 1830 8 Aug 2013 Journal Article,Research Support, Non-U.S. Gov't     |
| camk2g  | actin  | <a href="http://www.ncbi.nlm.nih.gov/entrez/query.fcgi?cmd=Retrieve&amp;db=pubmed&amp;dopt=Abstract&amp;list_uids=24463198">http://www.ncbi.nlm.nih.gov/entrez/query.fcgi?cmd=Retrieve&amp;db=pubmed&amp;dopt=Abstract&amp;list_uids=24463198</a>  6 Chem Biol Interact 211  Mar 2014 Journal Article,Review                                                                                                                                                                                                                                                                                                                                                 |
| camk2g  | ptk2   | <a href="http://www.ncbi.nlm.nih.gov/entrez/query.fcgi?cmd=Retrieve&amp;db=pubmed&amp;dopt=Abstract&amp;list_uids=24463198">http://www.ncbi.nlm.nih.gov/entrez/query.fcgi?cmd=Retrieve&amp;db=pubmed&amp;dopt=Abstract&amp;list_uids=24463198</a>  6 Chem Biol Interact 211  Mar 2014 Journal Article,Review                                                                                                                                                                                                                                                                                                                                                 |
| actin   | capza1 | <a href="http://www.ncbi.nlm.nih.gov/entrez/query.fcgi?cmd=Retrieve&amp;db=pubmed&amp;dopt=Abstract&amp;list_uids=24430196">http://www.ncbi.nlm.nih.gov/entrez/query.fcgi?cmd=Retrieve&amp;db=pubmed&amp;dopt=Abstract&amp;list_uids=24430196</a>  6 Mol Biosyst 10 3 Mar 2014 Journal Article,Research Support, Non-U.S. Gov't                                                                                                                                                                                                                                                                                                                              |
| smarcb1 | ilf3   | <a href="http://www.ncbi.nlm.nih.gov/entrez/query.fcgi?cmd=Retrieve&amp;db=pubmed&amp;dopt=Abstract&amp;list_uids=24430196">http://www.ncbi.nlm.nih.gov/entrez/query.fcgi?cmd=Retrieve&amp;db=pubmed&amp;dopt=Abstract&amp;list_uids=24430196</a>  6 Mol Biosyst 10 3 Mar 2014 Journal Article,Research Support, Non-U.S. Gov't                                                                                                                                                                                                                                                                                                                              |
| smarcb1 | dpy30  | <a href="http://www.ncbi.nlm.nih.gov/entrez/query.fcgi?cmd=Retrieve&amp;db=pubmed&amp;dopt=Abstract&amp;list_uids=24430196">http://www.ncbi.nlm.nih.gov/entrez/query.fcgi?cmd=Retrieve&amp;db=pubmed&amp;dopt=Abstract&amp;list_uids=24430196</a>  6 Mol Biosyst 10 3 Mar 2014 Journal Article,Research Support, Non-U.S. Gov't                                                                                                                                                                                                                                                                                                                              |

|         |         |                                                                                                                                                                                                                                                                                                                                                                                                                                                                                                                                                                                                                                                                                                     |
|---------|---------|-----------------------------------------------------------------------------------------------------------------------------------------------------------------------------------------------------------------------------------------------------------------------------------------------------------------------------------------------------------------------------------------------------------------------------------------------------------------------------------------------------------------------------------------------------------------------------------------------------------------------------------------------------------------------------------------------------|
| ilf3    | dpy30   | <a href="http://www.ncbi.nlm.nih.gov/entrez/query.fcgi?cmd=Retrieve&amp;db=pubmed&amp;dopt=Abstract&amp;list_uids=24430196">http://www.ncbi.nlm.nih.gov/entrez/query.fcgi?cmd=Retrieve&amp;db=pubmed&amp;dopt=Abstract&amp;list_uids=24430196</a> [6]Mol Biosyst[10]3 Mar 2014 Journal Article,Research Support, Non-U.S. Gov't                                                                                                                                                                                                                                                                                                                                                                     |
| grlf1   | cntnap1 | <a href="http://www.ncbi.nlm.nih.gov/entrez/query.fcgi?cmd=Retrieve&amp;db=pubmed&amp;dopt=Abstract&amp;list_uids=24403595">http://www.ncbi.nlm.nih.gov/entrez/query.fcgi?cmd=Retrieve&amp;db=pubmed&amp;dopt=Abstract&amp;list_uids=24403595</a> [6]J Virol[88]7 Apr 2014 Journal Article,Research Support, Non-U.S. Gov't                                                                                                                                                                                                                                                                                                                                                                         |
| grlf1   | rasa1   | <a href="http://www.ncbi.nlm.nih.gov/entrez/query.fcgi?cmd=Retrieve&amp;db=pubmed&amp;dopt=Abstract&amp;list_uids=24403595">http://www.ncbi.nlm.nih.gov/entrez/query.fcgi?cmd=Retrieve&amp;db=pubmed&amp;dopt=Abstract&amp;list_uids=24403595</a> [6]J Virol[88]7 Apr 2014 Journal Article,Research Support, Non-U.S. Gov't                                                                                                                                                                                                                                                                                                                                                                         |
| cntnap1 | rasa1   | <a href="http://www.ncbi.nlm.nih.gov/entrez/query.fcgi?cmd=Retrieve&amp;db=pubmed&amp;dopt=Abstract&amp;list_uids=24403595">http://www.ncbi.nlm.nih.gov/entrez/query.fcgi?cmd=Retrieve&amp;db=pubmed&amp;dopt=Abstract&amp;list_uids=24403595</a> [6]J Virol[88]7 Apr 2014 Journal Article,Research Support, Non-U.S. Gov't                                                                                                                                                                                                                                                                                                                                                                         |
| cntnap1 | rhoa    | <a href="http://www.ncbi.nlm.nih.gov/entrez/query.fcgi?cmd=Retrieve&amp;db=pubmed&amp;dopt=Abstract&amp;list_uids=24403595">http://www.ncbi.nlm.nih.gov/entrez/query.fcgi?cmd=Retrieve&amp;db=pubmed&amp;dopt=Abstract&amp;list_uids=24403595</a> [6]J Virol[88]7 Apr 2014 Journal Article,Research Support, Non-U.S. Gov't                                                                                                                                                                                                                                                                                                                                                                         |
| rasa1   | rhoa    | <a href="http://www.ncbi.nlm.nih.gov/entrez/query.fcgi?cmd=Retrieve&amp;db=pubmed&amp;dopt=Abstract&amp;list_uids=24403595">http://www.ncbi.nlm.nih.gov/entrez/query.fcgi?cmd=Retrieve&amp;db=pubmed&amp;dopt=Abstract&amp;list_uids=24403595</a> [6]J Virol[88]7 Apr 2014 Journal Article,Research Support, Non-U.S. Gov't  <a href="http://www.ncbi.nlm.nih.gov/entrez/query.fcgi?cmd=Retrieve&amp;db=pubmed&amp;dopt=Abstract&amp;list_uids=24333506">http://www.ncbi.nlm.nih.gov/entrez/query.fcgi?cmd=Retrieve&amp;db=pubmed&amp;dopt=Abstract&amp;list_uids=24333506</a> [6]Exp Cell Res[321]2 Feb 2014 Journal Article,Research Support, N.I.H., Extramural,Research Support, Non-U.S. Gov't |
| git1    | egf     | <a href="http://www.ncbi.nlm.nih.gov/entrez/query.fcgi?cmd=Retrieve&amp;db=pubmed&amp;dopt=Abstract&amp;list_uids=24335959">http://www.ncbi.nlm.nih.gov/entrez/query.fcgi?cmd=Retrieve&amp;db=pubmed&amp;dopt=Abstract&amp;list_uids=24335959</a> [6]Cancer Res[74]3 Feb 2014 Journal Article,Research Support, Non-U.S. Gov't                                                                                                                                                                                                                                                                                                                                                                      |
| git1    | egfr    | <a href="http://www.ncbi.nlm.nih.gov/entrez/query.fcgi?cmd=Retrieve&amp;db=pubmed&amp;dopt=Abstract&amp;list_uids=24335959">http://www.ncbi.nlm.nih.gov/entrez/query.fcgi?cmd=Retrieve&amp;db=pubmed&amp;dopt=Abstract&amp;list_uids=24335959</a> [6]Cancer Res[74]3 Feb 2014 Journal Article,Research Support, Non-U.S. Gov't                                                                                                                                                                                                                                                                                                                                                                      |
| git1    | mapk3   | <a href="http://www.ncbi.nlm.nih.gov/entrez/query.fcgi?cmd=Retrieve&amp;db=pubmed&amp;dopt=Abstract&amp;list_uids=24335959">http://www.ncbi.nlm.nih.gov/entrez/query.fcgi?cmd=Retrieve&amp;db=pubmed&amp;dopt=Abstract&amp;list_uids=24335959</a> [6]Cancer Res[74]3 Feb 2014 Journal Article,Research Support, Non-U.S. Gov't                                                                                                                                                                                                                                                                                                                                                                      |
| git1    | mmp2    | <a href="http://www.ncbi.nlm.nih.gov/entrez/query.fcgi?cmd=Retrieve&amp;db=pubmed&amp;dopt=Abstract&amp;list_uids=24335959">http://www.ncbi.nlm.nih.gov/entrez/query.fcgi?cmd=Retrieve&amp;db=pubmed&amp;dopt=Abstract&amp;list_uids=24335959</a> [6]Cancer Res[74]3 Feb 2014 Journal Article,Research Support, Non-U.S. Gov't                                                                                                                                                                                                                                                                                                                                                                      |
| egf     | mmp2    | <a href="http://www.ncbi.nlm.nih.gov/entrez/query.fcgi?cmd=Retrieve&amp;db=pubmed&amp;dopt=Abstract&amp;list_uids=24335959">http://www.ncbi.nlm.nih.gov/entrez/query.fcgi?cmd=Retrieve&amp;db=pubmed&amp;dopt=Abstract&amp;list_uids=24335959</a> [6]Cancer Res[74]3 Feb 2014 Journal Article,Research Support, Non-U.S. Gov't                                                                                                                                                                                                                                                                                                                                                                      |
| egfr    | mapk3   | <a href="http://www.ncbi.nlm.nih.gov/entrez/query.fcgi?cmd=Retrieve&amp;db=pubmed&amp;dopt=Abstract&amp;list_uids=24335959">http://www.ncbi.nlm.nih.gov/entrez/query.fcgi?cmd=Retrieve&amp;db=pubmed&amp;dopt=Abstract&amp;list_uids=24335959</a> [6]Cancer Res[74]3 Feb 2014 Journal Article,Research Support, Non-U.S. Gov't                                                                                                                                                                                                                                                                                                                                                                      |
| egfr    | mmp2    | <a href="http://www.ncbi.nlm.nih.gov/entrez/query.fcgi?cmd=Retrieve&amp;db=pubmed&amp;dopt=Abstract&amp;list_uids=24335959">http://www.ncbi.nlm.nih.gov/entrez/query.fcgi?cmd=Retrieve&amp;db=pubmed&amp;dopt=Abstract&amp;list_uids=24335959</a> [6]Cancer Res[74]3 Feb 2014 Journal Article,Research Support, Non-U.S. Gov't                                                                                                                                                                                                                                                                                                                                                                      |
| mapk3   | mmp2    | <a href="http://www.ncbi.nlm.nih.gov/entrez/query.fcgi?cmd=Retrieve&amp;db=pubmed&amp;dopt=Abstract&amp;list_uids=24335959">http://www.ncbi.nlm.nih.gov/entrez/query.fcgi?cmd=Retrieve&amp;db=pubmed&amp;dopt=Abstract&amp;list_uids=24335959</a> [6]Cancer Res[74]3 Feb 2014 Journal Article,Research Support, Non-U.S. Gov't                                                                                                                                                                                                                                                                                                                                                                      |
| stard13 | rasa1   | <a href="http://www.ncbi.nlm.nih.gov/entrez/query.fcgi?cmd=Retrieve&amp;db=pubmed&amp;dopt=Abstract&amp;list_uids=24333506">http://www.ncbi.nlm.nih.gov/entrez/query.fcgi?cmd=Retrieve&amp;db=pubmed&amp;dopt=Abstract&amp;list_uids=24333506</a> [6]Exp Cell Res[321]2 Feb 2014 Journal Article,Research Support, N.I.H., Extramural,Research Support, Non-U.S. Gov't                                                                                                                                                                                                                                                                                                                              |
| stard13 | rhoa    | <a href="http://www.ncbi.nlm.nih.gov/entrez/query.fcgi?cmd=Retrieve&amp;db=pubmed&amp;dopt=Abstract&amp;list_uids=24333506">http://www.ncbi.nlm.nih.gov/entrez/query.fcgi?cmd=Retrieve&amp;db=pubmed&amp;dopt=Abstract&amp;list_uids=24333506</a> [6]Exp Cell Res[321]2 Feb 2014 Journal Article,Research Support, N.I.H., Extramural,Research Support, Non-U.S. Gov't                                                                                                                                                                                                                                                                                                                              |
| stard13 | cdc42   | <a href="http://www.ncbi.nlm.nih.gov/entrez/query.fcgi?cmd=Retrieve&amp;db=pubmed&amp;dopt=Abstract&amp;list_uids=24333506">http://www.ncbi.nlm.nih.gov/entrez/query.fcgi?cmd=Retrieve&amp;db=pubmed&amp;dopt=Abstract&amp;list_uids=24333506</a> [6]Exp Cell Res[321]2 Feb 2014 Journal Article,Research Support, N.I.H., Extramural,Research Support, Non-U.S. Gov't                                                                                                                                                                                                                                                                                                                              |

|        |        |                                                                                                                                                                                                                                                                                                                                                                                                                                                                                                                                                                                                                                                                                                             |
|--------|--------|-------------------------------------------------------------------------------------------------------------------------------------------------------------------------------------------------------------------------------------------------------------------------------------------------------------------------------------------------------------------------------------------------------------------------------------------------------------------------------------------------------------------------------------------------------------------------------------------------------------------------------------------------------------------------------------------------------------|
| rasa1  | cdc42  | <a href="http://www.ncbi.nlm.nih.gov/entrez/query.fcgi?cmd=Retrieve&amp;db=pubmed&amp;dopt=Abstract&amp;list_uids=24333506">http://www.ncbi.nlm.nih.gov/entrez/query.fcgi?cmd=Retrieve&amp;db=pubmed&amp;dopt=Abstract&amp;list_uids=24333506</a>  6 Exp Cell Res 321 2 Feb 2014 Journal Article,Research Support, N.I.H., Extramural,Research Support, Non-U.S. Gov't                                                                                                                                                                                                                                                                                                                                      |
| rhoa   | akt1   | <a href="http://www.ncbi.nlm.nih.gov/entrez/query.fcgi?cmd=Retrieve&amp;db=pubmed&amp;dopt=Abstract&amp;list_uids=24333506">http://www.ncbi.nlm.nih.gov/entrez/query.fcgi?cmd=Retrieve&amp;db=pubmed&amp;dopt=Abstract&amp;list_uids=24333506</a>  6 Exp Cell Res 321 2 Feb 2014 Journal Article,Research Support, N.I.H., Extramural,Research Support, Non-U.S. Gov't  <a href="http://www.ncbi.nlm.nih.gov/entrez/query.fcgi?cmd=Retrieve&amp;db=pubmed&amp;dopt=Abstract&amp;list_uids=23836527">http://www.ncbi.nlm.nih.gov/entrez/query.fcgi?cmd=Retrieve&amp;db=pubmed&amp;dopt=Abstract&amp;list_uids=23836527</a>  6 Stem Cells 31 11 Nov 2013 Journal Article,Research Support, N.I.H., Extramural |
| nsf    | mmrn1  | <a href="http://www.ncbi.nlm.nih.gov/entrez/query.fcgi?cmd=Retrieve&amp;db=pubmed&amp;dopt=Abstract&amp;list_uids=24311785">http://www.ncbi.nlm.nih.gov/entrez/query.fcgi?cmd=Retrieve&amp;db=pubmed&amp;dopt=Abstract&amp;list_uids=24311785</a>  6 J Biol Chem 289 4 Jan 2014 Journal Article,Research Support, N.I.H., Extramural,Research Support, Non-U.S. Gov't                                                                                                                                                                                                                                                                                                                                       |
| pik3ca | ptk2   | <a href="http://www.ncbi.nlm.nih.gov/entrez/query.fcgi?cmd=Retrieve&amp;db=pubmed&amp;dopt=Abstract&amp;list_uids=24290759">http://www.ncbi.nlm.nih.gov/entrez/query.fcgi?cmd=Retrieve&amp;db=pubmed&amp;dopt=Abstract&amp;list_uids=24290759</a>  6 Cell Rep 5 5 Dec 2013 Journal Article,Research Support, Non-U.S. Gov't                                                                                                                                                                                                                                                                                                                                                                                 |
| pik3ca | ptk2b  | <a href="http://www.ncbi.nlm.nih.gov/entrez/query.fcgi?cmd=Retrieve&amp;db=pubmed&amp;dopt=Abstract&amp;list_uids=24290759">http://www.ncbi.nlm.nih.gov/entrez/query.fcgi?cmd=Retrieve&amp;db=pubmed&amp;dopt=Abstract&amp;list_uids=24290759</a>  6 Cell Rep 5 5 Dec 2013 Journal Article,Research Support, Non-U.S. Gov't                                                                                                                                                                                                                                                                                                                                                                                 |
| rhoa   | arap3  | <a href="http://www.ncbi.nlm.nih.gov/entrez/query.fcgi?cmd=Retrieve&amp;db=pubmed&amp;dopt=Abstract&amp;list_uids=24290759">http://www.ncbi.nlm.nih.gov/entrez/query.fcgi?cmd=Retrieve&amp;db=pubmed&amp;dopt=Abstract&amp;list_uids=24290759</a>  6 Cell Rep 5 5 Dec 2013 Journal Article,Research Support, Non-U.S. Gov't                                                                                                                                                                                                                                                                                                                                                                                 |
| mmrn1  | mmp2   | <a href="http://www.ncbi.nlm.nih.gov/entrez/query.fcgi?cmd=Retrieve&amp;db=pubmed&amp;dopt=Abstract&amp;list_uids=24289792">http://www.ncbi.nlm.nih.gov/entrez/query.fcgi?cmd=Retrieve&amp;db=pubmed&amp;dopt=Abstract&amp;list_uids=24289792</a>  6 Arthritis Res Ther 15 5 2013 Journal Article,Research Support, Non-U.S. Gov't                                                                                                                                                                                                                                                                                                                                                                          |
| ptk2   | mmp2   | <a href="http://www.ncbi.nlm.nih.gov/entrez/query.fcgi?cmd=Retrieve&amp;db=pubmed&amp;dopt=Abstract&amp;list_uids=24289792">http://www.ncbi.nlm.nih.gov/entrez/query.fcgi?cmd=Retrieve&amp;db=pubmed&amp;dopt=Abstract&amp;list_uids=24289792</a>  6 Arthritis Res Ther 15 5 2013 Journal Article,Research Support, Non-U.S. Gov't                                                                                                                                                                                                                                                                                                                                                                          |
| ephb2  | ptk2   | <a href="http://www.ncbi.nlm.nih.gov/entrez/query.fcgi?cmd=Retrieve&amp;db=pubmed&amp;dopt=Abstract&amp;list_uids=24091658">http://www.ncbi.nlm.nih.gov/entrez/query.fcgi?cmd=Retrieve&amp;db=pubmed&amp;dopt=Abstract&amp;list_uids=24091658</a>  6 Cell Death Dis 4   2013 Journal Article,Research Support, Non-U.S. Gov't  <a href="http://www.ncbi.nlm.nih.gov/entrez/query.fcgi?cmd=Retrieve&amp;db=pubmed&amp;dopt=Abstract&amp;list_uids=24252447">http://www.ncbi.nlm.nih.gov/entrez/query.fcgi?cmd=Retrieve&amp;db=pubmed&amp;dopt=Abstract&amp;list_uids=24252447</a>  6 Acta Biomater 10 2 Feb 2014 Journal Article,Research Support, Non-U.S. Gov't                                            |
| ptk2   | pcsk1  | <a href="http://www.ncbi.nlm.nih.gov/entrez/query.fcgi?cmd=Retrieve&amp;db=pubmed&amp;dopt=Abstract&amp;list_uids=24194567">http://www.ncbi.nlm.nih.gov/entrez/query.fcgi?cmd=Retrieve&amp;db=pubmed&amp;dopt=Abstract&amp;list_uids=24194567</a>  6 Mol Cancer Ther 13 1 Jan 2014 Journal Article,Research Support, Non-U.S. Gov't                                                                                                                                                                                                                                                                                                                                                                         |
| tgm2   | jun    | <a href="http://www.ncbi.nlm.nih.gov/entrez/query.fcgi?cmd=Retrieve&amp;db=pubmed&amp;dopt=Abstract&amp;list_uids=24193434">http://www.ncbi.nlm.nih.gov/entrez/query.fcgi?cmd=Retrieve&amp;db=pubmed&amp;dopt=Abstract&amp;list_uids=24193434</a>  6 Cell Adh Migr 7 5  2013 Journal Article,Research Support, Non-U.S. Gov't                                                                                                                                                                                                                                                                                                                                                                               |
| tgm2   | mapk8  | <a href="http://www.ncbi.nlm.nih.gov/entrez/query.fcgi?cmd=Retrieve&amp;db=pubmed&amp;dopt=Abstract&amp;list_uids=24193434">http://www.ncbi.nlm.nih.gov/entrez/query.fcgi?cmd=Retrieve&amp;db=pubmed&amp;dopt=Abstract&amp;list_uids=24193434</a>  6 Cell Adh Migr 7 5  2013 Journal Article,Research Support, Non-U.S. Gov't                                                                                                                                                                                                                                                                                                                                                                               |
| dapk1  | actin  | <a href="http://www.ncbi.nlm.nih.gov/entrez/query.fcgi?cmd=Retrieve&amp;db=pubmed&amp;dopt=Abstract&amp;list_uids=24166137">http://www.ncbi.nlm.nih.gov/entrez/query.fcgi?cmd=Retrieve&amp;db=pubmed&amp;dopt=Abstract&amp;list_uids=24166137</a>  6 Apoptosis 19 2 Feb 2014 Journal Article,Research Support, Non-U.S. Gov't,Review                                                                                                                                                                                                                                                                                                                                                                        |
| dapk1  | stxbp1 | <a href="http://www.ncbi.nlm.nih.gov/entrez/query.fcgi?cmd=Retrieve&amp;db=pubmed&amp;dopt=Abstract&amp;list_uids=24166137">http://www.ncbi.nlm.nih.gov/entrez/query.fcgi?cmd=Retrieve&amp;db=pubmed&amp;dopt=Abstract&amp;list_uids=24166137</a>  6 Apoptosis 19 2 Feb 2014 Journal Article,Research Support, Non-U.S. Gov't,Review                                                                                                                                                                                                                                                                                                                                                                        |
| frap1  | pdlim5 | <a href="http://www.ncbi.nlm.nih.gov/entrez/query.fcgi?cmd=Retrieve&amp;db=pubmed&amp;dopt=Abstract&amp;list_uids=24165133">http://www.ncbi.nlm.nih.gov/entrez/query.fcgi?cmd=Retrieve&amp;db=pubmed&amp;dopt=Abstract&amp;list_uids=24165133</a>  6 J Biol Chem 288 49 Dec 2013 Journal Article,Research Support, N.I.H., Extramural,Research Support, Non-U.S. Gov't                                                                                                                                                                                                                                                                                                                                      |
| rhoa   | cyb5r3 | <a href="http://www.ncbi.nlm.nih.gov/entrez/query.fcgi?cmd=Retrieve&amp;db=pubmed&amp;dopt=Abstract&amp;list_uids=24126053">http://www.ncbi.nlm.nih.gov/entrez/query.fcgi?cmd=Retrieve&amp;db=pubmed&amp;dopt=Abstract&amp;list_uids=24126053</a>  6 Mol Cell Biol 33 24 Dec 2013 Journal Article,Research Support, N.I.H., Extramural                                                                                                                                                                                                                                                                                                                                                                      |

|        |              |                                                                                                                                                                                                                                                                                                                                                                                                                                                                                                                                                                                                                                                                                                               |
|--------|--------------|---------------------------------------------------------------------------------------------------------------------------------------------------------------------------------------------------------------------------------------------------------------------------------------------------------------------------------------------------------------------------------------------------------------------------------------------------------------------------------------------------------------------------------------------------------------------------------------------------------------------------------------------------------------------------------------------------------------|
| cyb5r3 | actin        | <a href="http://www.ncbi.nlm.nih.gov/entrez/query.fcgi?cmd=Retrieve&amp;db=pubmed&amp;dopt=Abstract&amp;list_uids=24126053">http://www.ncbi.nlm.nih.gov/entrez/query.fcgi?cmd=Retrieve&amp;db=pubmed&amp;dopt=Abstract&amp;list_uids=24126053</a>  6 Mol Cell Biol 33 24 Dec 2013 Journal Article,Research Support, N.I.H., Extramural                                                                                                                                                                                                                                                                                                                                                                        |
| actin  | yap1         | <a href="http://www.ncbi.nlm.nih.gov/entrez/query.fcgi?cmd=Retrieve&amp;db=pubmed&amp;dopt=Abstract&amp;list_uids=24120037">http://www.ncbi.nlm.nih.gov/entrez/query.fcgi?cmd=Retrieve&amp;db=pubmed&amp;dopt=Abstract&amp;list_uids=24120037</a>  6 Biomaterials 35 1 Jan 2014 Journal Article                                                                                                                                                                                                                                                                                                                                                                                                               |
| map3k7 | itk          | <a href="http://www.ncbi.nlm.nih.gov/entrez/query.fcgi?cmd=Retrieve&amp;db=pubmed&amp;dopt=Abstract&amp;list_uids=24113182">http://www.ncbi.nlm.nih.gov/entrez/query.fcgi?cmd=Retrieve&amp;db=pubmed&amp;dopt=Abstract&amp;list_uids=24113182</a>  6 Cell Death Dis 4   2013 Journal Article,Research Support, Non-U.S. Gov't                                                                                                                                                                                                                                                                                                                                                                                 |
| lats1  | yap1         | <a href="http://www.ncbi.nlm.nih.gov/entrez/query.fcgi?cmd=Retrieve&amp;db=pubmed&amp;dopt=Abstract&amp;list_uids=22215811">http://www.ncbi.nlm.nih.gov/entrez/query.fcgi?cmd=Retrieve&amp;db=pubmed&amp;dopt=Abstract&amp;list_uids=22215811</a>  6 Genes Dev 26 1 Jan 2012 Journal Article,Research Support, N.I.H., Extramural,Research Support, U.S. Gov't, Non-P.H.S.  <a href="http://www.ncbi.nlm.nih.gov/entrez/query.fcgi?cmd=Retrieve&amp;db=pubmed&amp;dopt=Abstract&amp;list_uids=24106267">http://www.ncbi.nlm.nih.gov/entrez/query.fcgi?cmd=Retrieve&amp;db=pubmed&amp;dopt=Abstract&amp;list_uids=24106267</a>  6 J Biol Chem 288 47 Nov 2013 Journal Article,Research Support, Non-U.S. Gov't |
| lats1  | taz          | <a href="http://www.ncbi.nlm.nih.gov/entrez/query.fcgi?cmd=Retrieve&amp;db=pubmed&amp;dopt=Abstract&amp;list_uids=24106267">http://www.ncbi.nlm.nih.gov/entrez/query.fcgi?cmd=Retrieve&amp;db=pubmed&amp;dopt=Abstract&amp;list_uids=24106267</a>  6 J Biol Chem 288 47 Nov 2013 Journal Article,Research Support, Non-U.S. Gov't                                                                                                                                                                                                                                                                                                                                                                             |
| rb12   | lats1        | <a href="http://www.ncbi.nlm.nih.gov/entrez/query.fcgi?cmd=Retrieve&amp;db=pubmed&amp;dopt=Abstract&amp;list_uids=24106267">http://www.ncbi.nlm.nih.gov/entrez/query.fcgi?cmd=Retrieve&amp;db=pubmed&amp;dopt=Abstract&amp;list_uids=24106267</a>  6 J Biol Chem 288 47 Nov 2013 Journal Article,Research Support, Non-U.S. Gov't                                                                                                                                                                                                                                                                                                                                                                             |
| rb12   | fzd4         | <a href="http://www.ncbi.nlm.nih.gov/entrez/query.fcgi?cmd=Retrieve&amp;db=pubmed&amp;dopt=Abstract&amp;list_uids=24106267">http://www.ncbi.nlm.nih.gov/entrez/query.fcgi?cmd=Retrieve&amp;db=pubmed&amp;dopt=Abstract&amp;list_uids=24106267</a>  6 J Biol Chem 288 47 Nov 2013 Journal Article,Research Support, Non-U.S. Gov't                                                                                                                                                                                                                                                                                                                                                                             |
| lats1  | fzd4         | <a href="http://www.ncbi.nlm.nih.gov/entrez/query.fcgi?cmd=Retrieve&amp;db=pubmed&amp;dopt=Abstract&amp;list_uids=24106267">http://www.ncbi.nlm.nih.gov/entrez/query.fcgi?cmd=Retrieve&amp;db=pubmed&amp;dopt=Abstract&amp;list_uids=24106267</a>  6 J Biol Chem 288 47 Nov 2013 Journal Article,Research Support, Non-U.S. Gov't                                                                                                                                                                                                                                                                                                                                                                             |
| amot   | lats1        | <a href="http://www.ncbi.nlm.nih.gov/entrez/query.fcgi?cmd=Retrieve&amp;db=pubmed&amp;dopt=Abstract&amp;list_uids=24106267">http://www.ncbi.nlm.nih.gov/entrez/query.fcgi?cmd=Retrieve&amp;db=pubmed&amp;dopt=Abstract&amp;list_uids=24106267</a>  6 J Biol Chem 288 47 Nov 2013 Journal Article,Research Support, Non-U.S. Gov't                                                                                                                                                                                                                                                                                                                                                                             |
| egfr   | ephb2        | <a href="http://www.ncbi.nlm.nih.gov/entrez/query.fcgi?cmd=Retrieve&amp;db=pubmed&amp;dopt=Abstract&amp;list_uids=24091658">http://www.ncbi.nlm.nih.gov/entrez/query.fcgi?cmd=Retrieve&amp;db=pubmed&amp;dopt=Abstract&amp;list_uids=24091658</a>  6 Cell Death Dis 4   2013 Journal Article,Research Support, Non-U.S. Gov't                                                                                                                                                                                                                                                                                                                                                                                 |
| egfr   | cdk5         | <a href="http://www.ncbi.nlm.nih.gov/entrez/query.fcgi?cmd=Retrieve&amp;db=pubmed&amp;dopt=Abstract&amp;list_uids=24091658">http://www.ncbi.nlm.nih.gov/entrez/query.fcgi?cmd=Retrieve&amp;db=pubmed&amp;dopt=Abstract&amp;list_uids=24091658</a>  6 Cell Death Dis 4   2013 Journal Article,Research Support, Non-U.S. Gov't                                                                                                                                                                                                                                                                                                                                                                                 |
| ephb2  | cdk5         | <a href="http://www.ncbi.nlm.nih.gov/entrez/query.fcgi?cmd=Retrieve&amp;db=pubmed&amp;dopt=Abstract&amp;list_uids=24091658">http://www.ncbi.nlm.nih.gov/entrez/query.fcgi?cmd=Retrieve&amp;db=pubmed&amp;dopt=Abstract&amp;list_uids=24091658</a>  6 Cell Death Dis 4   2013 Journal Article,Research Support, Non-U.S. Gov't                                                                                                                                                                                                                                                                                                                                                                                 |
| cdk5   | ptk2         | <a href="http://www.ncbi.nlm.nih.gov/entrez/query.fcgi?cmd=Retrieve&amp;db=pubmed&amp;dopt=Abstract&amp;list_uids=24091658">http://www.ncbi.nlm.nih.gov/entrez/query.fcgi?cmd=Retrieve&amp;db=pubmed&amp;dopt=Abstract&amp;list_uids=24091658</a>  6 Cell Death Dis 4   2013 Journal Article,Research Support, Non-U.S. Gov't                                                                                                                                                                                                                                                                                                                                                                                 |
| egf    | tim8a        | <a href="http://www.ncbi.nlm.nih.gov/entrez/query.fcgi?cmd=Retrieve&amp;db=pubmed&amp;dopt=Abstract&amp;list_uids=24091658">http://www.ncbi.nlm.nih.gov/entrez/query.fcgi?cmd=Retrieve&amp;db=pubmed&amp;dopt=Abstract&amp;list_uids=24091658</a>  6 Cell Death Dis 4   2013 Journal Article,Research Support, Non-U.S. Gov't                                                                                                                                                                                                                                                                                                                                                                                 |
| egfr   | tim8a        | <a href="http://www.ncbi.nlm.nih.gov/entrez/query.fcgi?cmd=Retrieve&amp;db=pubmed&amp;dopt=Abstract&amp;list_uids=24091658">http://www.ncbi.nlm.nih.gov/entrez/query.fcgi?cmd=Retrieve&amp;db=pubmed&amp;dopt=Abstract&amp;list_uids=24091658</a>  6 Cell Death Dis 4   2013 Journal Article,Research Support, Non-U.S. Gov't                                                                                                                                                                                                                                                                                                                                                                                 |
| ptk2   | 2.7.7.4<br>8 | <a href="http://www.ncbi.nlm.nih.gov/entrez/query.fcgi?cmd=Retrieve&amp;db=pubmed&amp;dopt=Abstract&amp;list_uids=24061591">http://www.ncbi.nlm.nih.gov/entrez/query.fcgi?cmd=Retrieve&amp;db=pubmed&amp;dopt=Abstract&amp;list_uids=24061591</a>  6 Dig Dis Sci 58 12 Dec 2013 Journal Article,Research Support, Non-U.S. Gov't                                                                                                                                                                                                                                                                                                                                                                              |
| ptk2   | ervk2        | <a href="http://www.ncbi.nlm.nih.gov/entrez/query.fcgi?cmd=Retrieve&amp;db=pubmed&amp;dopt=Abstract&amp;list_uids=24061591">http://www.ncbi.nlm.nih.gov/entrez/query.fcgi?cmd=Retrieve&amp;db=pubmed&amp;dopt=Abstract&amp;list_uids=24061591</a>  6 Dig Dis Sci 58 12 Dec 2013 Journal Article,Research Support, Non-U.S. Gov't                                                                                                                                                                                                                                                                                                                                                                              |

|              |              |                                                                                                                                                                                                                                                                                                                                                                                                                                                                                                                                                                                                                                                                                                                                                                                                                                                                                                                                                                                                                                                     |
|--------------|--------------|-----------------------------------------------------------------------------------------------------------------------------------------------------------------------------------------------------------------------------------------------------------------------------------------------------------------------------------------------------------------------------------------------------------------------------------------------------------------------------------------------------------------------------------------------------------------------------------------------------------------------------------------------------------------------------------------------------------------------------------------------------------------------------------------------------------------------------------------------------------------------------------------------------------------------------------------------------------------------------------------------------------------------------------------------------|
| lpa          | 2.7.7.4<br>8 | <a href="http://www.ncbi.nlm.nih.gov/entrez/query.fcgi?cmd=Retrieve&amp;db=pubmed&amp;dopt=Abstract&amp;list_uids=24061591">http://www.ncbi.nlm.nih.gov/entrez/query.fcgi?cmd=Retrieve&amp;db=pubmed&amp;dopt=Abstract&amp;list_uids=24061591</a>  6 Dig Dis Sci 58 12 Dec 2013 Journal Article,Research Support, Non-U.S. Gov't                                                                                                                                                                                                                                                                                                                                                                                                                                                                                                                                                                                                                                                                                                                    |
| lpa          | ervk2        | <a href="http://www.ncbi.nlm.nih.gov/entrez/query.fcgi?cmd=Retrieve&amp;db=pubmed&amp;dopt=Abstract&amp;list_uids=24061591">http://www.ncbi.nlm.nih.gov/entrez/query.fcgi?cmd=Retrieve&amp;db=pubmed&amp;dopt=Abstract&amp;list_uids=24061591</a>  6 Dig Dis Sci 58 12 Dec 2013 Journal Article,Research Support, Non-U.S. Gov't                                                                                                                                                                                                                                                                                                                                                                                                                                                                                                                                                                                                                                                                                                                    |
| 2.7.7.4<br>8 | ervk2        | <a href="http://www.ncbi.nlm.nih.gov/entrez/query.fcgi?cmd=Retrieve&amp;db=pubmed&amp;dopt=Abstract&amp;list_uids=24061591">http://www.ncbi.nlm.nih.gov/entrez/query.fcgi?cmd=Retrieve&amp;db=pubmed&amp;dopt=Abstract&amp;list_uids=24061591</a>  6 Dig Dis Sci 58 12 Dec 2013 Journal Article,Research Support, Non-U.S. Gov't                                                                                                                                                                                                                                                                                                                                                                                                                                                                                                                                                                                                                                                                                                                    |
| lpar1        | lpar3        | <a href="http://www.ncbi.nlm.nih.gov/entrez/query.fcgi?cmd=Retrieve&amp;db=pubmed&amp;dopt=Abstract&amp;list_uids=24061591">http://www.ncbi.nlm.nih.gov/entrez/query.fcgi?cmd=Retrieve&amp;db=pubmed&amp;dopt=Abstract&amp;list_uids=24061591</a>  6 Dig Dis Sci 58 12 Dec 2013 Journal Article,Research Support, Non-U.S. Gov't                                                                                                                                                                                                                                                                                                                                                                                                                                                                                                                                                                                                                                                                                                                    |
| lpar1        | lpa          | <a href="http://www.ncbi.nlm.nih.gov/entrez/query.fcgi?cmd=Retrieve&amp;db=pubmed&amp;dopt=Abstract&amp;list_uids=24061591">http://www.ncbi.nlm.nih.gov/entrez/query.fcgi?cmd=Retrieve&amp;db=pubmed&amp;dopt=Abstract&amp;list_uids=24061591</a>  6 Dig Dis Sci 58 12 Dec 2013 Journal Article,Research Support, Non-U.S. Gov't                                                                                                                                                                                                                                                                                                                                                                                                                                                                                                                                                                                                                                                                                                                    |
| lpar1        | ptk2         | <a href="http://www.ncbi.nlm.nih.gov/entrez/query.fcgi?cmd=Retrieve&amp;db=pubmed&amp;dopt=Abstract&amp;list_uids=24061591">http://www.ncbi.nlm.nih.gov/entrez/query.fcgi?cmd=Retrieve&amp;db=pubmed&amp;dopt=Abstract&amp;list_uids=24061591</a>  6 Dig Dis Sci 58 12 Dec 2013 Journal Article,Research Support, Non-U.S. Gov't                                                                                                                                                                                                                                                                                                                                                                                                                                                                                                                                                                                                                                                                                                                    |
| lpar3        | lpa          | <a href="http://www.ncbi.nlm.nih.gov/entrez/query.fcgi?cmd=Retrieve&amp;db=pubmed&amp;dopt=Abstract&amp;list_uids=24061591">http://www.ncbi.nlm.nih.gov/entrez/query.fcgi?cmd=Retrieve&amp;db=pubmed&amp;dopt=Abstract&amp;list_uids=24061591</a>  6 Dig Dis Sci 58 12 Dec 2013 Journal Article,Research Support, Non-U.S. Gov't                                                                                                                                                                                                                                                                                                                                                                                                                                                                                                                                                                                                                                                                                                                    |
| lpar3        | ptk2         | <a href="http://www.ncbi.nlm.nih.gov/entrez/query.fcgi?cmd=Retrieve&amp;db=pubmed&amp;dopt=Abstract&amp;list_uids=24061591">http://www.ncbi.nlm.nih.gov/entrez/query.fcgi?cmd=Retrieve&amp;db=pubmed&amp;dopt=Abstract&amp;list_uids=24061591</a>  6 Dig Dis Sci 58 12 Dec 2013 Journal Article,Research Support, Non-U.S. Gov't                                                                                                                                                                                                                                                                                                                                                                                                                                                                                                                                                                                                                                                                                                                    |
| marvel<br>d1 | actin        | <a href="http://www.ncbi.nlm.nih.gov/entrez/query.fcgi?cmd=Retrieve&amp;db=pubmed&amp;dopt=Abstract&amp;list_uids=24055813">http://www.ncbi.nlm.nih.gov/entrez/query.fcgi?cmd=Retrieve&amp;db=pubmed&amp;dopt=Abstract&amp;list_uids=24055813</a>  6 Int J Biochem Cell Biol 45 11 Nov 2013 Journal Article,Research Support, Non-U.S. Gov't                                                                                                                                                                                                                                                                                                                                                                                                                                                                                                                                                                                                                                                                                                        |
| marvel<br>d1 | sfrs2        | <a href="http://www.ncbi.nlm.nih.gov/entrez/query.fcgi?cmd=Retrieve&amp;db=pubmed&amp;dopt=Abstract&amp;list_uids=24055813">http://www.ncbi.nlm.nih.gov/entrez/query.fcgi?cmd=Retrieve&amp;db=pubmed&amp;dopt=Abstract&amp;list_uids=24055813</a>  6 Int J Biochem Cell Biol 45 11 Nov 2013 Journal Article,Research Support, Non-U.S. Gov't                                                                                                                                                                                                                                                                                                                                                                                                                                                                                                                                                                                                                                                                                                        |
| marvel<br>d1 | ncbp2        | <a href="http://www.ncbi.nlm.nih.gov/entrez/query.fcgi?cmd=Retrieve&amp;db=pubmed&amp;dopt=Abstract&amp;list_uids=24055813">http://www.ncbi.nlm.nih.gov/entrez/query.fcgi?cmd=Retrieve&amp;db=pubmed&amp;dopt=Abstract&amp;list_uids=24055813</a>  6 Int J Biochem Cell Biol 45 11 Nov 2013 Journal Article,Research Support, Non-U.S. Gov't                                                                                                                                                                                                                                                                                                                                                                                                                                                                                                                                                                                                                                                                                                        |
| sfrs2        | ncbp2        | <a href="http://www.ncbi.nlm.nih.gov/entrez/query.fcgi?cmd=Retrieve&amp;db=pubmed&amp;dopt=Abstract&amp;list_uids=24055813">http://www.ncbi.nlm.nih.gov/entrez/query.fcgi?cmd=Retrieve&amp;db=pubmed&amp;dopt=Abstract&amp;list_uids=24055813</a>  6 Int J Biochem Cell Biol 45 11 Nov 2013 Journal Article,Research Support, Non-U.S. Gov't                                                                                                                                                                                                                                                                                                                                                                                                                                                                                                                                                                                                                                                                                                        |
| marvel<br>d2 | elmo1        | <a href="http://www.ncbi.nlm.nih.gov/entrez/query.fcgi?cmd=Retrieve&amp;db=pubmed&amp;dopt=Abstract&amp;list_uids=24050303">http://www.ncbi.nlm.nih.gov/entrez/query.fcgi?cmd=Retrieve&amp;db=pubmed&amp;dopt=Abstract&amp;list_uids=24050303</a>  6 Fluids Barriers CNS 10 1 2013 Journal Article                                                                                                                                                                                                                                                                                                                                                                                                                                                                                                                                                                                                                                                                                                                                                  |
| 3.6.4.1      | fas          | <a href="http://www.ncbi.nlm.nih.gov/entrez/query.fcgi?cmd=Retrieve&amp;db=pubmed&amp;dopt=Abstract&amp;list_uids=23830911">http://www.ncbi.nlm.nih.gov/entrez/query.fcgi?cmd=Retrieve&amp;db=pubmed&amp;dopt=Abstract&amp;list_uids=23830911</a>  6 Curr Opin Cell Biol 25 5 Oct 2013 Journal Article,Research Support, N.I.H., Intramural,Review  <a href="http://www.ncbi.nlm.nih.gov/entrez/query.fcgi?cmd=Retrieve&amp;db=pubmed&amp;dopt=Abstract&amp;list_uids=22524451">http://www.ncbi.nlm.nih.gov/entrez/query.fcgi?cmd=Retrieve&amp;db=pubmed&amp;dopt=Abstract&amp;list_uids=22524451</a>  6 Cell Biol Int 36 7 Jul 2012 Journal Article,Research Support, Non-U.S. Gov't  <a href="http://www.ncbi.nlm.nih.gov/entrez/query.fcgi?cmd=Retrieve&amp;db=pubmed&amp;dopt=Abstract&amp;list_uids=24039980">http://www.ncbi.nlm.nih.gov/entrez/query.fcgi?cmd=Retrieve&amp;db=pubmed&amp;dopt=Abstract&amp;list_uids=24039980</a>  6 PLoS One 8 9 2013 Journal Article,Research Support, N.I.H., Extramural,Research Support, Non-U.S. Gov't |
| actin        | csrp1        | <a href="http://www.ncbi.nlm.nih.gov/entrez/query.fcgi?cmd=Retrieve&amp;db=pubmed&amp;dopt=Abstract&amp;list_uids=24036928">http://www.ncbi.nlm.nih.gov/entrez/query.fcgi?cmd=Retrieve&amp;db=pubmed&amp;dopt=Abstract&amp;list_uids=24036928</a>  6 Cell Cycle 12 21 Nov 2013 Journal Article,Research Support, N.I.H., Extramural,Research Support, Non-U.S. Gov't                                                                                                                                                                                                                                                                                                                                                                                                                                                                                                                                                                                                                                                                                |
| hras         | ephb2        | <a href="http://www.ncbi.nlm.nih.gov/entrez/query.fcgi?cmd=Retrieve&amp;db=pubmed&amp;dopt=Abstract&amp;list_uids=23995792">http://www.ncbi.nlm.nih.gov/entrez/query.fcgi?cmd=Retrieve&amp;db=pubmed&amp;dopt=Abstract&amp;list_uids=23995792</a>  6 Oncogene 33 28 Jul 2014 Journal Article,Research Support, Non-U.S. Gov't                                                                                                                                                                                                                                                                                                                                                                                                                                                                                                                                                                                                                                                                                                                       |



|         |         |                                                                                                                                                                                                                                                                                                                                                                                                                                                                                                                                                                                                                                                                                                                                  |
|---------|---------|----------------------------------------------------------------------------------------------------------------------------------------------------------------------------------------------------------------------------------------------------------------------------------------------------------------------------------------------------------------------------------------------------------------------------------------------------------------------------------------------------------------------------------------------------------------------------------------------------------------------------------------------------------------------------------------------------------------------------------|
| hras    | mapk3   | <a href="http://www.ncbi.nlm.nih.gov/entrez/query.fcgi?cmd=Retrieve&amp;db=pubmed&amp;dopt=Abstract&amp;list_uids=23995792">http://www.ncbi.nlm.nih.gov/entrez/query.fcgi?cmd=Retrieve&amp;db=pubmed&amp;dopt=Abstract&amp;list_uids=23995792</a>  6 Oncogene 33 28 Jul 2014 Journal Article,Research Support, Non-U.S. Gov't                                                                                                                                                                                                                                                                                                                                                                                                    |
| ephb2   | pik3ca  | <a href="http://www.ncbi.nlm.nih.gov/entrez/query.fcgi?cmd=Retrieve&amp;db=pubmed&amp;dopt=Abstract&amp;list_uids=23995792">http://www.ncbi.nlm.nih.gov/entrez/query.fcgi?cmd=Retrieve&amp;db=pubmed&amp;dopt=Abstract&amp;list_uids=23995792</a>  6 Oncogene 33 28 Jul 2014 Journal Article,Research Support, Non-U.S. Gov't                                                                                                                                                                                                                                                                                                                                                                                                    |
| akt1    | cdc42   | <a href="http://www.ncbi.nlm.nih.gov/entrez/query.fcgi?cmd=Retrieve&amp;db=pubmed&amp;dopt=Abstract&amp;list_uids=23344455">http://www.ncbi.nlm.nih.gov/entrez/query.fcgi?cmd=Retrieve&amp;db=pubmed&amp;dopt=Abstract&amp;list_uids=23344455</a>  6 Toxins (Basel) 5 1 Jan 2013 Comparative Study,Journal Article,Research Support, Non-U.S. Gov't  <a href="http://www.ncbi.nlm.nih.gov/entrez/query.fcgi?cmd=Retrieve&amp;db=pubmed&amp;dopt=Abstract&amp;list_uids=23974244">http://www.ncbi.nlm.nih.gov/entrez/query.fcgi?cmd=Retrieve&amp;db=pubmed&amp;dopt=Abstract&amp;list_uids=23974244</a>  6 Cell Mol Life Sci 71 10 May 2014 Journal Article,Research Support, Non-U.S. Gov't                                      |
| tnc     | itk     | <a href="http://www.ncbi.nlm.nih.gov/entrez/query.fcgi?cmd=Retrieve&amp;db=pubmed&amp;dopt=Abstract&amp;list_uids=23958855">http://www.ncbi.nlm.nih.gov/entrez/query.fcgi?cmd=Retrieve&amp;db=pubmed&amp;dopt=Abstract&amp;list_uids=23958855</a>  6 Oncogenesis 2   2013 Journal Article                                                                                                                                                                                                                                                                                                                                                                                                                                        |
| tnc     | tnfsf13 | <a href="http://www.ncbi.nlm.nih.gov/entrez/query.fcgi?cmd=Retrieve&amp;db=pubmed&amp;dopt=Abstract&amp;list_uids=23958855">http://www.ncbi.nlm.nih.gov/entrez/query.fcgi?cmd=Retrieve&amp;db=pubmed&amp;dopt=Abstract&amp;list_uids=23958855</a>  6 Oncogenesis 2   2013 Journal Article                                                                                                                                                                                                                                                                                                                                                                                                                                        |
| tnfsf13 | itk     | <a href="http://www.ncbi.nlm.nih.gov/entrez/query.fcgi?cmd=Retrieve&amp;db=pubmed&amp;dopt=Abstract&amp;list_uids=23958855">http://www.ncbi.nlm.nih.gov/entrez/query.fcgi?cmd=Retrieve&amp;db=pubmed&amp;dopt=Abstract&amp;list_uids=23958855</a>  6 Oncogenesis 2   2013 Journal Article                                                                                                                                                                                                                                                                                                                                                                                                                                        |
| mmp3    | ephb2   | <a href="http://www.ncbi.nlm.nih.gov/entrez/query.fcgi?cmd=Retrieve&amp;db=pubmed&amp;dopt=Abstract&amp;list_uids=23940616">http://www.ncbi.nlm.nih.gov/entrez/query.fcgi?cmd=Retrieve&amp;db=pubmed&amp;dopt=Abstract&amp;list_uids=23940616</a>  6 PLoS One 8 8  2013 Journal Article,Research Support, N.I.H., Extramural,Research Support, Non-U.S. Gov't  <a href="http://www.ncbi.nlm.nih.gov/entrez/query.fcgi?cmd=Retrieve&amp;db=pubmed&amp;dopt=Abstract&amp;list_uids=22829527">http://www.ncbi.nlm.nih.gov/entrez/query.fcgi?cmd=Retrieve&amp;db=pubmed&amp;dopt=Abstract&amp;list_uids=22829527</a>  6 FASEB J 26 11 Nov 2012 Journal Article,Research Support, N.I.H., Extramural,Research Support, Non-U.S. Gov't |
| plau    | vegfa   | <a href="http://www.ncbi.nlm.nih.gov/entrez/query.fcgi?cmd=Retrieve&amp;db=pubmed&amp;dopt=Abstract&amp;list_uids=23939376">http://www.ncbi.nlm.nih.gov/entrez/query.fcgi?cmd=Retrieve&amp;db=pubmed&amp;dopt=Abstract&amp;list_uids=23939376</a>  6 Mol Cancer Ther 12 10 Oct 2013 Journal Article,Research Support, Non-U.S. Gov't                                                                                                                                                                                                                                                                                                                                                                                             |
| plau    | plaur   | <a href="http://www.ncbi.nlm.nih.gov/entrez/query.fcgi?cmd=Retrieve&amp;db=pubmed&amp;dopt=Abstract&amp;list_uids=23485561">http://www.ncbi.nlm.nih.gov/entrez/query.fcgi?cmd=Retrieve&amp;db=pubmed&amp;dopt=Abstract&amp;list_uids=23485561</a>  6 Mol Biol Cell 24 9 May 2013 Journal Article,Research Support, Non-U.S. Gov't  <a href="http://www.ncbi.nlm.nih.gov/entrez/query.fcgi?cmd=Retrieve&amp;db=pubmed&amp;dopt=Abstract&amp;list_uids=23939376">http://www.ncbi.nlm.nih.gov/entrez/query.fcgi?cmd=Retrieve&amp;db=pubmed&amp;dopt=Abstract&amp;list_uids=23939376</a>  6 Mol Cancer Ther 12 10 Oct 2013 Journal Article,Research Support, Non-U.S. Gov't                                                          |
| btg2    | ros1    | <a href="http://www.ncbi.nlm.nih.gov/entrez/query.fcgi?cmd=Retrieve&amp;db=pubmed&amp;dopt=Abstract&amp;list_uids=23907596">http://www.ncbi.nlm.nih.gov/entrez/query.fcgi?cmd=Retrieve&amp;db=pubmed&amp;dopt=Abstract&amp;list_uids=23907596</a>  6 J Cancer Res Clin Oncol 139 10 Oct 2013 Journal Article,Research Support, Non-U.S. Gov't                                                                                                                                                                                                                                                                                                                                                                                    |
| btg2    | actin   | <a href="http://www.ncbi.nlm.nih.gov/entrez/query.fcgi?cmd=Retrieve&amp;db=pubmed&amp;dopt=Abstract&amp;list_uids=23907596">http://www.ncbi.nlm.nih.gov/entrez/query.fcgi?cmd=Retrieve&amp;db=pubmed&amp;dopt=Abstract&amp;list_uids=23907596</a>  6 J Cancer Res Clin Oncol 139 10 Oct 2013 Journal Article,Research Support, Non-U.S. Gov't                                                                                                                                                                                                                                                                                                                                                                                    |
| ros1    | actin   | <a href="http://www.ncbi.nlm.nih.gov/entrez/query.fcgi?cmd=Retrieve&amp;db=pubmed&amp;dopt=Abstract&amp;list_uids=23907596">http://www.ncbi.nlm.nih.gov/entrez/query.fcgi?cmd=Retrieve&amp;db=pubmed&amp;dopt=Abstract&amp;list_uids=23907596</a>  6 J Cancer Res Clin Oncol 139 10 Oct 2013 Journal Article,Research Support, Non-U.S. Gov't                                                                                                                                                                                                                                                                                                                                                                                    |
| nedd9   | bcar1   | <a href="http://www.ncbi.nlm.nih.gov/entrez/query.fcgi?cmd=Retrieve&amp;db=pubmed&amp;dopt=Abstract&amp;list_uids=23874939">http://www.ncbi.nlm.nih.gov/entrez/query.fcgi?cmd=Retrieve&amp;db=pubmed&amp;dopt=Abstract&amp;list_uids=23874939</a>  6 PLoS One 8 7  2013 Journal Article,Research Support, Non-U.S. Gov't                                                                                                                                                                                                                                                                                                                                                                                                         |
| nedd9   | cse1l   | <a href="http://www.ncbi.nlm.nih.gov/entrez/query.fcgi?cmd=Retrieve&amp;db=pubmed&amp;dopt=Abstract&amp;list_uids=23874939">http://www.ncbi.nlm.nih.gov/entrez/query.fcgi?cmd=Retrieve&amp;db=pubmed&amp;dopt=Abstract&amp;list_uids=23874939</a>  6 PLoS One 8 7  2013 Journal Article,Research Support, Non-U.S. Gov't                                                                                                                                                                                                                                                                                                                                                                                                         |
| pkd1    | vasp    | <a href="http://www.ncbi.nlm.nih.gov/entrez/query.fcgi?cmd=Retrieve&amp;db=pubmed&amp;dopt=Abstract&amp;list_uids=23846685">http://www.ncbi.nlm.nih.gov/entrez/query.fcgi?cmd=Retrieve&amp;db=pubmed&amp;dopt=Abstract&amp;list_uids=23846685</a>  6 J Biol Chem 288 34 Aug 2013 Journal Article,Research Support, N.I.H., Extramural,Research Support, Non-U.S. Gov't                                                                                                                                                                                                                                                                                                                                                           |

|         |        |                                                                                                                                                                                                                                                                                                                                                                                                                                                                                                                                                                                                                                                                                                                                                                                                                                                                                                                                                                                                                                                                |
|---------|--------|----------------------------------------------------------------------------------------------------------------------------------------------------------------------------------------------------------------------------------------------------------------------------------------------------------------------------------------------------------------------------------------------------------------------------------------------------------------------------------------------------------------------------------------------------------------------------------------------------------------------------------------------------------------------------------------------------------------------------------------------------------------------------------------------------------------------------------------------------------------------------------------------------------------------------------------------------------------------------------------------------------------------------------------------------------------|
| rhoa    | vasp   | <a href="http://www.ncbi.nlm.nih.gov/entrez/query.fcgi?cmd=Retrieve&amp;db=pubmed&amp;dopt=Abstract&amp;list_uids=23846685">http://www.ncbi.nlm.nih.gov/entrez/query.fcgi?cmd=Retrieve&amp;db=pubmed&amp;dopt=Abstract&amp;list_uids=23846685</a>  6 J Biol Chem 288 34 Aug 2013 Journal Article,Research Support, N.I.H., Extramural,Research Support, Non-U.S. Gov't                                                                                                                                                                                                                                                                                                                                                                                                                                                                                                                                                                                                                                                                                         |
| fyn     | rhoa   | <a href="http://www.ncbi.nlm.nih.gov/entrez/query.fcgi?cmd=Retrieve&amp;db=pubmed&amp;dopt=Abstract&amp;list_uids=23836527">http://www.ncbi.nlm.nih.gov/entrez/query.fcgi?cmd=Retrieve&amp;db=pubmed&amp;dopt=Abstract&amp;list_uids=23836527</a>  6 Stem Cells 31 11 Nov 2013 Journal Article,Research Support, N.I.H., Extramural                                                                                                                                                                                                                                                                                                                                                                                                                                                                                                                                                                                                                                                                                                                            |
| fas     | src    | <a href="http://www.ncbi.nlm.nih.gov/entrez/query.fcgi?cmd=Retrieve&amp;db=pubmed&amp;dopt=Abstract&amp;list_uids=23754369">http://www.ncbi.nlm.nih.gov/entrez/query.fcgi?cmd=Retrieve&amp;db=pubmed&amp;dopt=Abstract&amp;list_uids=23754369</a>  6 Proc Natl Acad Sci U S A 110 26 Jun 2013 Journal Article,Research Support, N.I.H., Intramural,Research Support, Non-U.S. Gov't  <a href="http://www.ncbi.nlm.nih.gov/entrez/query.fcgi?cmd=Retrieve&amp;db=pubmed&amp;dopt=Abstract&amp;list_uids=22291036">http://www.ncbi.nlm.nih.gov/entrez/query.fcgi?cmd=Retrieve&amp;db=pubmed&amp;dopt=Abstract&amp;list_uids=22291036</a>  6 J Cell Biol 196 3 Feb 2012 Journal Article,Research Support, N.I.H., Extramural  <a href="http://www.ncbi.nlm.nih.gov/entrez/query.fcgi?cmd=Retrieve&amp;db=pubmed&amp;dopt=Abstract&amp;list_uids=23836527">http://www.ncbi.nlm.nih.gov/entrez/query.fcgi?cmd=Retrieve&amp;db=pubmed&amp;dopt=Abstract&amp;list_uids=23836527</a>  6 Stem Cells 31 11 Nov 2013 Journal Article,Research Support, N.I.H., Extramural |
| fyn     | fas    | <a href="http://www.ncbi.nlm.nih.gov/entrez/query.fcgi?cmd=Retrieve&amp;db=pubmed&amp;dopt=Abstract&amp;list_uids=23836527">http://www.ncbi.nlm.nih.gov/entrez/query.fcgi?cmd=Retrieve&amp;db=pubmed&amp;dopt=Abstract&amp;list_uids=23836527</a>  6 Stem Cells 31 11 Nov 2013 Journal Article,Research Support, N.I.H., Extramural                                                                                                                                                                                                                                                                                                                                                                                                                                                                                                                                                                                                                                                                                                                            |
| ptk2    | fyn    | <a href="http://www.ncbi.nlm.nih.gov/entrez/query.fcgi?cmd=Retrieve&amp;db=pubmed&amp;dopt=Abstract&amp;list_uids=23836527">http://www.ncbi.nlm.nih.gov/entrez/query.fcgi?cmd=Retrieve&amp;db=pubmed&amp;dopt=Abstract&amp;list_uids=23836527</a>  6 Stem Cells 31 11 Nov 2013 Journal Article,Research Support, N.I.H., Extramural                                                                                                                                                                                                                                                                                                                                                                                                                                                                                                                                                                                                                                                                                                                            |
| fyn     | actin  | <a href="http://www.ncbi.nlm.nih.gov/entrez/query.fcgi?cmd=Retrieve&amp;db=pubmed&amp;dopt=Abstract&amp;list_uids=23836527">http://www.ncbi.nlm.nih.gov/entrez/query.fcgi?cmd=Retrieve&amp;db=pubmed&amp;dopt=Abstract&amp;list_uids=23836527</a>  6 Stem Cells 31 11 Nov 2013 Journal Article,Research Support, N.I.H., Extramural                                                                                                                                                                                                                                                                                                                                                                                                                                                                                                                                                                                                                                                                                                                            |
| fyn     | msc    | <a href="http://www.ncbi.nlm.nih.gov/entrez/query.fcgi?cmd=Retrieve&amp;db=pubmed&amp;dopt=Abstract&amp;list_uids=23836527">http://www.ncbi.nlm.nih.gov/entrez/query.fcgi?cmd=Retrieve&amp;db=pubmed&amp;dopt=Abstract&amp;list_uids=23836527</a>  6 Stem Cells 31 11 Nov 2013 Journal Article,Research Support, N.I.H., Extramural                                                                                                                                                                                                                                                                                                                                                                                                                                                                                                                                                                                                                                                                                                                            |
| fyn     | adipoq | <a href="http://www.ncbi.nlm.nih.gov/entrez/query.fcgi?cmd=Retrieve&amp;db=pubmed&amp;dopt=Abstract&amp;list_uids=23836527">http://www.ncbi.nlm.nih.gov/entrez/query.fcgi?cmd=Retrieve&amp;db=pubmed&amp;dopt=Abstract&amp;list_uids=23836527</a>  6 Stem Cells 31 11 Nov 2013 Journal Article,Research Support, N.I.H., Extramural                                                                                                                                                                                                                                                                                                                                                                                                                                                                                                                                                                                                                                                                                                                            |
| msc     | src    | <a href="http://www.ncbi.nlm.nih.gov/entrez/query.fcgi?cmd=Retrieve&amp;db=pubmed&amp;dopt=Abstract&amp;list_uids=23836527">http://www.ncbi.nlm.nih.gov/entrez/query.fcgi?cmd=Retrieve&amp;db=pubmed&amp;dopt=Abstract&amp;list_uids=23836527</a>  6 Stem Cells 31 11 Nov 2013 Journal Article,Research Support, N.I.H., Extramural                                                                                                                                                                                                                                                                                                                                                                                                                                                                                                                                                                                                                                                                                                                            |
| msc     | adipoq | <a href="http://www.ncbi.nlm.nih.gov/entrez/query.fcgi?cmd=Retrieve&amp;db=pubmed&amp;dopt=Abstract&amp;list_uids=23836527">http://www.ncbi.nlm.nih.gov/entrez/query.fcgi?cmd=Retrieve&amp;db=pubmed&amp;dopt=Abstract&amp;list_uids=23836527</a>  6 Stem Cells 31 11 Nov 2013 Journal Article,Research Support, N.I.H., Extramural                                                                                                                                                                                                                                                                                                                                                                                                                                                                                                                                                                                                                                                                                                                            |
| src     | adipoq | <a href="http://www.ncbi.nlm.nih.gov/entrez/query.fcgi?cmd=Retrieve&amp;db=pubmed&amp;dopt=Abstract&amp;list_uids=23836527">http://www.ncbi.nlm.nih.gov/entrez/query.fcgi?cmd=Retrieve&amp;db=pubmed&amp;dopt=Abstract&amp;list_uids=23836527</a>  6 Stem Cells 31 11 Nov 2013 Journal Article,Research Support, N.I.H., Extramural                                                                                                                                                                                                                                                                                                                                                                                                                                                                                                                                                                                                                                                                                                                            |
| 3.6.4.1 | mmrn1  | <a href="http://www.ncbi.nlm.nih.gov/entrez/query.fcgi?cmd=Retrieve&amp;db=pubmed&amp;dopt=Abstract&amp;list_uids=23830911">http://www.ncbi.nlm.nih.gov/entrez/query.fcgi?cmd=Retrieve&amp;db=pubmed&amp;dopt=Abstract&amp;list_uids=23830911</a>  6 Curr Opin Cell Biol 25 5 Oct 2013 Journal Article,Research Support, N.I.H., Intramural,Review  <a href="http://www.ncbi.nlm.nih.gov/entrez/query.fcgi?cmd=Retrieve&amp;db=pubmed&amp;dopt=Abstract&amp;list_uids=23708000">http://www.ncbi.nlm.nih.gov/entrez/query.fcgi?cmd=Retrieve&amp;db=pubmed&amp;dopt=Abstract&amp;list_uids=23708000</a>  6 Nat Cell Biol 15 6 Jun 2013 Journal Article,Research Support, Non-U.S. Gov't                                                                                                                                                                                                                                                                                                                                                                          |
| cdc42   | actin  | <a href="http://www.ncbi.nlm.nih.gov/entrez/query.fcgi?cmd=Retrieve&amp;db=pubmed&amp;dopt=Abstract&amp;list_uids=23826261">http://www.ncbi.nlm.nih.gov/entrez/query.fcgi?cmd=Retrieve&amp;db=pubmed&amp;dopt=Abstract&amp;list_uids=23826261</a>  6 PLoS One 8 6 2013 Journal Article,Research Support, Non-U.S. Gov't                                                                                                                                                                                                                                                                                                                                                                                                                                                                                                                                                                                                                                                                                                                                        |
| mirn29a | cdc42  | <a href="http://www.ncbi.nlm.nih.gov/entrez/query.fcgi?cmd=Retrieve&amp;db=pubmed&amp;dopt=Abstract&amp;list_uids=23826261">http://www.ncbi.nlm.nih.gov/entrez/query.fcgi?cmd=Retrieve&amp;db=pubmed&amp;dopt=Abstract&amp;list_uids=23826261</a>  6 PLoS One 8 6 2013 Journal Article,Research Support, Non-U.S. Gov't                                                                                                                                                                                                                                                                                                                                                                                                                                                                                                                                                                                                                                                                                                                                        |
| net1    | rhoa   | <a href="http://www.ncbi.nlm.nih.gov/entrez/query.fcgi?cmd=Retrieve&amp;db=pubmed&amp;dopt=Abstract&amp;list_uids=23792411">http://www.ncbi.nlm.nih.gov/entrez/query.fcgi?cmd=Retrieve&amp;db=pubmed&amp;dopt=Abstract&amp;list_uids=23792411</a>  6 Cell Adh Migr 7 4 2013 Comment,Journal Article,Research Support, N.I.H., Extramural,Research Support, Non-U.S.                                                                                                                                                                                                                                                                                                                                                                                                                                                                                                                                                                                                                                                                                            |

|         |        |                                                                                                                                                                                                                                                                                                                                                                                                                                                                                                                                                                                                                                                                                                                                                                                                                                                                                                                                                                                                                                                                                                             |
|---------|--------|-------------------------------------------------------------------------------------------------------------------------------------------------------------------------------------------------------------------------------------------------------------------------------------------------------------------------------------------------------------------------------------------------------------------------------------------------------------------------------------------------------------------------------------------------------------------------------------------------------------------------------------------------------------------------------------------------------------------------------------------------------------------------------------------------------------------------------------------------------------------------------------------------------------------------------------------------------------------------------------------------------------------------------------------------------------------------------------------------------------|
|         |        | Gov't  <a href="http://www.ncbi.nlm.nih.gov/entrez/query.fcgi?cmd=Retrieve&amp;db=pubmed&amp;dopt=Abstract&amp;list_uids=23689132">http://www.ncbi.nlm.nih.gov/entrez/query.fcgi?cmd=Retrieve&amp;db=pubmed&amp;dopt=Abstract&amp;list_uids=23689132</a>  6 Mo<br>l Cell Biol 33 14 Jul 2013 Journal Article,Research Support, N.I.H., Extramural,Research Support, Non-U.S.<br>Gov't  <a href="http://www.ncbi.nlm.nih.gov/entrez/query.fcgi?cmd=Retrieve&amp;db=pubmed&amp;dopt=Abstract&amp;list_uids=23184663">http://www.ncbi.nlm.nih.gov/entrez/query.fcgi?cmd=Retrieve&amp;db=pubmed&amp;dopt=Abstract&amp;list_uids=23184663</a>  6 Mo<br>l Cell Biol 33 3 Feb 2013 Journal Article,Research Support, N.I.H., Extramural                                                                                                                                                                                                                                                                                                                                                                            |
| rac1    | net1   | <a href="http://www.ncbi.nlm.nih.gov/entrez/query.fcgi?cmd=Retrieve&amp;db=pubmed&amp;dopt=Abstract&amp;list_uids=23792411">http://www.ncbi.nlm.nih.gov/entrez/query.fcgi?cmd=Retrieve&amp;db=pubmed&amp;dopt=Abstract&amp;list_uids=23792411</a>  6 Cell Adh<br>Migr 7 4  2013 Comment,Journal Article,Research Support, N.I.H., Extramural,Research Support, Non-U.S.<br>Gov't  <a href="http://www.ncbi.nlm.nih.gov/entrez/query.fcgi?cmd=Retrieve&amp;db=pubmed&amp;dopt=Abstract&amp;list_uids=23184663">http://www.ncbi.nlm.nih.gov/entrez/query.fcgi?cmd=Retrieve&amp;db=pubmed&amp;dopt=Abstract&amp;list_uids=23184663</a>  6 Mo<br>l Cell Biol 33 3 Feb 2013 Journal Article,Research Support, N.I.H., Extramural                                                                                                                                                                                                                                                                                                                                                                                 |
| net1    | myh14  | <a href="http://www.ncbi.nlm.nih.gov/entrez/query.fcgi?cmd=Retrieve&amp;db=pubmed&amp;dopt=Abstract&amp;list_uids=23792411">http://www.ncbi.nlm.nih.gov/entrez/query.fcgi?cmd=Retrieve&amp;db=pubmed&amp;dopt=Abstract&amp;list_uids=23792411</a>  6 Cell Adh<br>Migr 7 4  2013 Comment,Journal Article,Research Support, N.I.H., Extramural,Research Support, Non-U.S.<br>Gov't  <a href="http://www.ncbi.nlm.nih.gov/entrez/query.fcgi?cmd=Retrieve&amp;db=pubmed&amp;dopt=Abstract&amp;list_uids=23689132">http://www.ncbi.nlm.nih.gov/entrez/query.fcgi?cmd=Retrieve&amp;db=pubmed&amp;dopt=Abstract&amp;list_uids=23689132</a>  6 Mo<br>l Cell Biol 33 14 Jul 2013 Journal Article,Research Support, N.I.H., Extramural,Research Support, Non-U.S.<br>Gov't  <a href="http://www.ncbi.nlm.nih.gov/entrez/query.fcgi?cmd=Retrieve&amp;db=pubmed&amp;dopt=Abstract&amp;list_uids=23184663">http://www.ncbi.nlm.nih.gov/entrez/query.fcgi?cmd=Retrieve&amp;db=pubmed&amp;dopt=Abstract&amp;list_uids=23184663</a>  6 Mo<br>l Cell Biol 33 3 Feb 2013 Journal Article,Research Support, N.I.H., Extramural |
| bcar3   | actin  | <a href="http://www.ncbi.nlm.nih.gov/entrez/query.fcgi?cmd=Retrieve&amp;db=pubmed&amp;dopt=Abstract&amp;list_uids=23762409">http://www.ncbi.nlm.nih.gov/entrez/query.fcgi?cmd=Retrieve&amp;db=pubmed&amp;dopt=Abstract&amp;list_uids=23762409</a>  6 PLoS<br>One 8 6  2013 Journal Article,Research Support, N.I.H., Extramural,Research Support, Non-U.S. Gov't                                                                                                                                                                                                                                                                                                                                                                                                                                                                                                                                                                                                                                                                                                                                            |
| bcar3   | rhoa   | <a href="http://www.ncbi.nlm.nih.gov/entrez/query.fcgi?cmd=Retrieve&amp;db=pubmed&amp;dopt=Abstract&amp;list_uids=23762409">http://www.ncbi.nlm.nih.gov/entrez/query.fcgi?cmd=Retrieve&amp;db=pubmed&amp;dopt=Abstract&amp;list_uids=23762409</a>  6 PLoS<br>One 8 6  2013 Journal Article,Research Support, N.I.H., Extramural,Research Support, Non-U.S. Gov't                                                                                                                                                                                                                                                                                                                                                                                                                                                                                                                                                                                                                                                                                                                                            |
| bcar3   | myh14  | <a href="http://www.ncbi.nlm.nih.gov/entrez/query.fcgi?cmd=Retrieve&amp;db=pubmed&amp;dopt=Abstract&amp;list_uids=23762409">http://www.ncbi.nlm.nih.gov/entrez/query.fcgi?cmd=Retrieve&amp;db=pubmed&amp;dopt=Abstract&amp;list_uids=23762409</a>  6 PLoS<br>One 8 6  2013 Journal Article,Research Support, N.I.H., Extramural,Research Support, Non-U.S. Gov't                                                                                                                                                                                                                                                                                                                                                                                                                                                                                                                                                                                                                                                                                                                                            |
| bbs4    | rhoa   | <a href="http://www.ncbi.nlm.nih.gov/entrez/query.fcgi?cmd=Retrieve&amp;db=pubmed&amp;dopt=Abstract&amp;list_uids=23716571">http://www.ncbi.nlm.nih.gov/entrez/query.fcgi?cmd=Retrieve&amp;db=pubmed&amp;dopt=Abstract&amp;list_uids=23716571</a>  6 Hum Mol<br>Genet 22 19 Oct 2013 Journal Article,Research Support, Non-U.S. Gov't                                                                                                                                                                                                                                                                                                                                                                                                                                                                                                                                                                                                                                                                                                                                                                       |
| bbs4    | actin  | <a href="http://www.ncbi.nlm.nih.gov/entrez/query.fcgi?cmd=Retrieve&amp;db=pubmed&amp;dopt=Abstract&amp;list_uids=23716571">http://www.ncbi.nlm.nih.gov/entrez/query.fcgi?cmd=Retrieve&amp;db=pubmed&amp;dopt=Abstract&amp;list_uids=23716571</a>  6 Hum Mol<br>Genet 22 19 Oct 2013 Journal Article,Research Support, Non-U.S. Gov't                                                                                                                                                                                                                                                                                                                                                                                                                                                                                                                                                                                                                                                                                                                                                                       |
| cox7a2l | mapre3 | <a href="http://www.ncbi.nlm.nih.gov/entrez/query.fcgi?cmd=Retrieve&amp;db=pubmed&amp;dopt=Abstract&amp;list_uids=23712260">http://www.ncbi.nlm.nih.gov/entrez/query.fcgi?cmd=Retrieve&amp;db=pubmed&amp;dopt=Abstract&amp;list_uids=23712260</a>  6 J Cell<br>Biol 201 5 May 2013 Journal Article,Research Support, Non-U.S.<br>Gov't  <a href="http://www.ncbi.nlm.nih.gov/entrez/query.fcgi?cmd=Retrieve&amp;db=pubmed&amp;dopt=Abstract&amp;list_uids=22949735">http://www.ncbi.nlm.nih.gov/entrez/query.fcgi?cmd=Retrieve&amp;db=pubmed&amp;dopt=Abstract&amp;list_uids=22949735</a>  6 Sci<br>Signal 5 240 Sep 2012 Comparative Study,Journal Article,Research Support, N.I.H., Extramural,Research Support, Non-U.S.<br>Gov't                                                                                                                                                                                                                                                                                                                                                                        |
| yap1    | tbx1   | <a href="http://www.ncbi.nlm.nih.gov/entrez/query.fcgi?cmd=Retrieve&amp;db=pubmed&amp;dopt=Abstract&amp;list_uids=23708000">http://www.ncbi.nlm.nih.gov/entrez/query.fcgi?cmd=Retrieve&amp;db=pubmed&amp;dopt=Abstract&amp;list_uids=23708000</a>  6 Nat Cell<br>Biol 15 6 Jun 2013 Journal Article,Research Support, Non-U.S. Gov't                                                                                                                                                                                                                                                                                                                                                                                                                                                                                                                                                                                                                                                                                                                                                                        |
| yap1    | kat2b  | <a href="http://www.ncbi.nlm.nih.gov/entrez/query.fcgi?cmd=Retrieve&amp;db=pubmed&amp;dopt=Abstract&amp;list_uids=23708000">http://www.ncbi.nlm.nih.gov/entrez/query.fcgi?cmd=Retrieve&amp;db=pubmed&amp;dopt=Abstract&amp;list_uids=23708000</a>  6 Nat Cell<br>Biol 15 6 Jun 2013 Journal Article,Research Support, Non-U.S. Gov't                                                                                                                                                                                                                                                                                                                                                                                                                                                                                                                                                                                                                                                                                                                                                                        |
| 3.6.4.1 | yap1   | <a href="http://www.ncbi.nlm.nih.gov/entrez/query.fcgi?cmd=Retrieve&amp;db=pubmed&amp;dopt=Abstract&amp;list_uids=23708000">http://www.ncbi.nlm.nih.gov/entrez/query.fcgi?cmd=Retrieve&amp;db=pubmed&amp;dopt=Abstract&amp;list_uids=23708000</a>  6 Nat Cell<br>Biol 15 6 Jun 2013 Journal Article,Research Support, Non-U.S. Gov't                                                                                                                                                                                                                                                                                                                                                                                                                                                                                                                                                                                                                                                                                                                                                                        |
| src     | yap1   | <a href="http://www.ncbi.nlm.nih.gov/entrez/query.fcgi?cmd=Retrieve&amp;db=pubmed&amp;dopt=Abstract&amp;list_uids=23708000">http://www.ncbi.nlm.nih.gov/entrez/query.fcgi?cmd=Retrieve&amp;db=pubmed&amp;dopt=Abstract&amp;list_uids=23708000</a>  6 Nat Cell                                                                                                                                                                                                                                                                                                                                                                                                                                                                                                                                                                                                                                                                                                                                                                                                                                               |

|        |       |                                                                                                                                                                                                                                                                                                                                                                         |
|--------|-------|-------------------------------------------------------------------------------------------------------------------------------------------------------------------------------------------------------------------------------------------------------------------------------------------------------------------------------------------------------------------------|
|        |       | Biol 15 6 Jun 2013 Journal Article,Research Support, Non-U.S. Gov't                                                                                                                                                                                                                                                                                                     |
| abl2   | actin | <a href="http://www.ncbi.nlm.nih.gov/entrez/query.fcgi?cmd=Retrieve&amp;db=pubmed&amp;dopt=Abstract&amp;list_uids=23707396">http://www.ncbi.nlm.nih.gov/entrez/query.fcgi?cmd=Retrieve&amp;db=pubmed&amp;dopt=Abstract&amp;list_uids=23707396</a>  6 Exp Cell Res 319 13 Aug 2013 Journal Article                                                                       |
| abl2   | rhoa  | <a href="http://www.ncbi.nlm.nih.gov/entrez/query.fcgi?cmd=Retrieve&amp;db=pubmed&amp;dopt=Abstract&amp;list_uids=23707396">http://www.ncbi.nlm.nih.gov/entrez/query.fcgi?cmd=Retrieve&amp;db=pubmed&amp;dopt=Abstract&amp;list_uids=23707396</a>  6 Exp Cell Res 319 13 Aug 2013 Journal Article                                                                       |
| abl2   | grlf1 | <a href="http://www.ncbi.nlm.nih.gov/entrez/query.fcgi?cmd=Retrieve&amp;db=pubmed&amp;dopt=Abstract&amp;list_uids=23707396">http://www.ncbi.nlm.nih.gov/entrez/query.fcgi?cmd=Retrieve&amp;db=pubmed&amp;dopt=Abstract&amp;list_uids=23707396</a>  6 Exp Cell Res 319 13 Aug 2013 Journal Article                                                                       |
| abl2   | crk   | <a href="http://www.ncbi.nlm.nih.gov/entrez/query.fcgi?cmd=Retrieve&amp;db=pubmed&amp;dopt=Abstract&amp;list_uids=23707396">http://www.ncbi.nlm.nih.gov/entrez/query.fcgi?cmd=Retrieve&amp;db=pubmed&amp;dopt=Abstract&amp;list_uids=23707396</a>  6 Exp Cell Res 319 13 Aug 2013 Journal Article                                                                       |
| actin  | grlf1 | <a href="http://www.ncbi.nlm.nih.gov/entrez/query.fcgi?cmd=Retrieve&amp;db=pubmed&amp;dopt=Abstract&amp;list_uids=23707396">http://www.ncbi.nlm.nih.gov/entrez/query.fcgi?cmd=Retrieve&amp;db=pubmed&amp;dopt=Abstract&amp;list_uids=23707396</a>  6 Exp Cell Res 319 13 Aug 2013 Journal Article                                                                       |
| actin  | crk   | <a href="http://www.ncbi.nlm.nih.gov/entrez/query.fcgi?cmd=Retrieve&amp;db=pubmed&amp;dopt=Abstract&amp;list_uids=23707396">http://www.ncbi.nlm.nih.gov/entrez/query.fcgi?cmd=Retrieve&amp;db=pubmed&amp;dopt=Abstract&amp;list_uids=23707396</a>  6 Exp Cell Res 319 13 Aug 2013 Journal Article                                                                       |
| rhoa   | crk   | <a href="http://www.ncbi.nlm.nih.gov/entrez/query.fcgi?cmd=Retrieve&amp;db=pubmed&amp;dopt=Abstract&amp;list_uids=23707396">http://www.ncbi.nlm.nih.gov/entrez/query.fcgi?cmd=Retrieve&amp;db=pubmed&amp;dopt=Abstract&amp;list_uids=23707396</a>  6 Exp Cell Res 319 13 Aug 2013 Journal Article                                                                       |
| grlf1  | crk   | <a href="http://www.ncbi.nlm.nih.gov/entrez/query.fcgi?cmd=Retrieve&amp;db=pubmed&amp;dopt=Abstract&amp;list_uids=23707396">http://www.ncbi.nlm.nih.gov/entrez/query.fcgi?cmd=Retrieve&amp;db=pubmed&amp;dopt=Abstract&amp;list_uids=23707396</a>  6 Exp Cell Res 319 13 Aug 2013 Journal Article                                                                       |
| net1   | lpa   | <a href="http://www.ncbi.nlm.nih.gov/entrez/query.fcgi?cmd=Retrieve&amp;db=pubmed&amp;dopt=Abstract&amp;list_uids=23689132">http://www.ncbi.nlm.nih.gov/entrez/query.fcgi?cmd=Retrieve&amp;db=pubmed&amp;dopt=Abstract&amp;list_uids=23689132</a>  6 Mol Cell Biol 33 14 Jul 2013 Journal Article,Research Support, N.I.H., Extramural,Research Support, Non-U.S. Gov't |
| net1   | ptk2  | <a href="http://www.ncbi.nlm.nih.gov/entrez/query.fcgi?cmd=Retrieve&amp;db=pubmed&amp;dopt=Abstract&amp;list_uids=23689132">http://www.ncbi.nlm.nih.gov/entrez/query.fcgi?cmd=Retrieve&amp;db=pubmed&amp;dopt=Abstract&amp;list_uids=23689132</a>  6 Mol Cell Biol 33 14 Jul 2013 Journal Article,Research Support, N.I.H., Extramural,Research Support, Non-U.S. Gov't |
| net1   | mmrn1 | <a href="http://www.ncbi.nlm.nih.gov/entrez/query.fcgi?cmd=Retrieve&amp;db=pubmed&amp;dopt=Abstract&amp;list_uids=23689132">http://www.ncbi.nlm.nih.gov/entrez/query.fcgi?cmd=Retrieve&amp;db=pubmed&amp;dopt=Abstract&amp;list_uids=23689132</a>  6 Mol Cell Biol 33 14 Jul 2013 Journal Article,Research Support, N.I.H., Extramural,Research Support, Non-U.S. Gov't |
| zdhhc1 | rab5a | <a href="http://www.ncbi.nlm.nih.gov/entrez/query.fcgi?cmd=Retrieve&amp;db=pubmed&amp;dopt=Abstract&amp;list_uids=23687301">http://www.ncbi.nlm.nih.gov/entrez/query.fcgi?cmd=Retrieve&amp;db=pubmed&amp;dopt=Abstract&amp;list_uids=23687301</a>  6 J Biol Chem 288 27 Jul 2013 Journal Article,Research Support, Non-U.S. Gov't                                       |
| epha1  | epha2 | <a href="http://www.ncbi.nlm.nih.gov/entrez/query.fcgi?cmd=Retrieve&amp;db=pubmed&amp;dopt=Abstract&amp;list_uids=23686814">http://www.ncbi.nlm.nih.gov/entrez/query.fcgi?cmd=Retrieve&amp;db=pubmed&amp;dopt=Abstract&amp;list_uids=23686814</a>  6 Cell Biol Int 37 10 Oct 2013 Journal Article,Research Support, Non-U.S. Gov't                                      |
| ptk2   | tp53  | <a href="http://www.ncbi.nlm.nih.gov/entrez/query.fcgi?cmd=Retrieve&amp;db=pubmed&amp;dopt=Abstract&amp;list_uids=23686429">http://www.ncbi.nlm.nih.gov/entrez/query.fcgi?cmd=Retrieve&amp;db=pubmed&amp;dopt=Abstract&amp;list_uids=23686429</a>  6 Mol Cells 36 1 Jul 2013 Journal Article,Research Support, Non-U.S. Gov't,Review                                    |
| ptk2   | gata4 | <a href="http://www.ncbi.nlm.nih.gov/entrez/query.fcgi?cmd=Retrieve&amp;db=pubmed&amp;dopt=Abstract&amp;list_uids=23686429">http://www.ncbi.nlm.nih.gov/entrez/query.fcgi?cmd=Retrieve&amp;db=pubmed&amp;dopt=Abstract&amp;list_uids=23686429</a>  6 Mol Cells 36 1 Jul 2013 Journal Article,Research Support, Non-U.S. Gov't,Review                                    |
| tp53   | gata4 | <a href="http://www.ncbi.nlm.nih.gov/entrez/query.fcgi?cmd=Retrieve&amp;db=pubmed&amp;dopt=Abstract&amp;list_uids=23686429">http://www.ncbi.nlm.nih.gov/entrez/query.fcgi?cmd=Retrieve&amp;db=pubmed&amp;dopt=Abstract&amp;list_uids=23686429</a>  6 Mol Cells 36 1 Jul 2013 Journal Article,Research Support, Non-U.S. Gov't,Review                                    |
| pecam1 | kdr   | <a href="http://www.ncbi.nlm.nih.gov/entrez/query.fcgi?cmd=Retrieve&amp;db=pubmed&amp;dopt=Abstract&amp;list_uids=23684974">http://www.ncbi.nlm.nih.gov/entrez/query.fcgi?cmd=Retrieve&amp;db=pubmed&amp;dopt=Abstract&amp;list_uids=23684974</a>  6 Curr Biol 23 11 Jun 2013 Journal Article,Research Support, N.I.H., Extramural,Research Support, Non-U.S. Gov't     |

|          |           |                                                                                                                                                                                                                                                                                                                                                                                                                                                                                                                                                                                                                                                                                                                                |
|----------|-----------|--------------------------------------------------------------------------------------------------------------------------------------------------------------------------------------------------------------------------------------------------------------------------------------------------------------------------------------------------------------------------------------------------------------------------------------------------------------------------------------------------------------------------------------------------------------------------------------------------------------------------------------------------------------------------------------------------------------------------------|
| isl1     | myh14     | <a href="http://www.ncbi.nlm.nih.gov/entrez/query.fcgi?cmd=Retrieve&amp;db=pubmed&amp;dopt=Abstract&amp;list_uids=23681438">http://www.ncbi.nlm.nih.gov/entrez/query.fcgi?cmd=Retrieve&amp;db=pubmed&amp;dopt=Abstract&amp;list_uids=23681438</a>  6 EMBO Rep 14 6 Jun 2013 Journal Article,Research Support, Non-U.S. Gov't,Review                                                                                                                                                                                                                                                                                                                                                                                            |
| mat1a    | myh14     | <a href="http://www.ncbi.nlm.nih.gov/entrez/query.fcgi?cmd=Retrieve&amp;db=pubmed&amp;dopt=Abstract&amp;list_uids=23676281">http://www.ncbi.nlm.nih.gov/entrez/query.fcgi?cmd=Retrieve&amp;db=pubmed&amp;dopt=Abstract&amp;list_uids=23676281</a>  6 Cell Adh Migr 7 3  2013 Journal Article,Research Support, Non-U.S. Gov't                                                                                                                                                                                                                                                                                                                                                                                                  |
| mat1a    | dynamidin | <a href="http://www.ncbi.nlm.nih.gov/entrez/query.fcgi?cmd=Retrieve&amp;db=pubmed&amp;dopt=Abstract&amp;list_uids=23676281">http://www.ncbi.nlm.nih.gov/entrez/query.fcgi?cmd=Retrieve&amp;db=pubmed&amp;dopt=Abstract&amp;list_uids=23676281</a>  6 Cell Adh Migr 7 3  2013 Journal Article,Research Support, Non-U.S. Gov't                                                                                                                                                                                                                                                                                                                                                                                                  |
| myh14    | dynamidin | <a href="http://www.ncbi.nlm.nih.gov/entrez/query.fcgi?cmd=Retrieve&amp;db=pubmed&amp;dopt=Abstract&amp;list_uids=23676281">http://www.ncbi.nlm.nih.gov/entrez/query.fcgi?cmd=Retrieve&amp;db=pubmed&amp;dopt=Abstract&amp;list_uids=23676281</a>  6 Cell Adh Migr 7 3  2013 Journal Article,Research Support, Non-U.S. Gov't                                                                                                                                                                                                                                                                                                                                                                                                  |
| stk11    | ptk2      | <a href="http://www.ncbi.nlm.nih.gov/entrez/query.fcgi?cmd=Retrieve&amp;db=pubmed&amp;dopt=Abstract&amp;list_uids=23637231">http://www.ncbi.nlm.nih.gov/entrez/query.fcgi?cmd=Retrieve&amp;db=pubmed&amp;dopt=Abstract&amp;list_uids=23637231</a>  6 J Biol Chem 288 24 Jun 2013 Journal Article,Research Support, N.I.H., Extramural,Research Support, Non-U.S. Gov't                                                                                                                                                                                                                                                                                                                                                         |
| stk11    | tyr       | <a href="http://www.ncbi.nlm.nih.gov/entrez/query.fcgi?cmd=Retrieve&amp;db=pubmed&amp;dopt=Abstract&amp;list_uids=23637231">http://www.ncbi.nlm.nih.gov/entrez/query.fcgi?cmd=Retrieve&amp;db=pubmed&amp;dopt=Abstract&amp;list_uids=23637231</a>  6 J Biol Chem 288 24 Jun 2013 Journal Article,Research Support, N.I.H., Extramural,Research Support, Non-U.S. Gov't                                                                                                                                                                                                                                                                                                                                                         |
| ppm1f    | mapk1     | <a href="http://www.ncbi.nlm.nih.gov/entrez/query.fcgi?cmd=Retrieve&amp;db=pubmed&amp;dopt=Abstract&amp;list_uids=23621870">http://www.ncbi.nlm.nih.gov/entrez/query.fcgi?cmd=Retrieve&amp;db=pubmed&amp;dopt=Abstract&amp;list_uids=23621870</a>  6 J Proteome Res 12 6 Jun 2013 Journal Article,Research Support, Non-U.S. Gov't                                                                                                                                                                                                                                                                                                                                                                                             |
| ankrd13a | mirn204   | <a href="http://www.ncbi.nlm.nih.gov/entrez/query.fcgi?cmd=Retrieve&amp;db=pubmed&amp;dopt=Abstract&amp;list_uids=23620728">http://www.ncbi.nlm.nih.gov/entrez/query.fcgi?cmd=Retrieve&amp;db=pubmed&amp;dopt=Abstract&amp;list_uids=23620728</a>  6 PLoS One 8 4  2013 Journal Article,Research Support, Non-U.S. Gov't                                                                                                                                                                                                                                                                                                                                                                                                       |
| vav2     | rhoa      | <a href="http://www.ncbi.nlm.nih.gov/entrez/query.fcgi?cmd=Retrieve&amp;db=pubmed&amp;dopt=Abstract&amp;list_uids=23615439">http://www.ncbi.nlm.nih.gov/entrez/query.fcgi?cmd=Retrieve&amp;db=pubmed&amp;dopt=Abstract&amp;list_uids=23615439</a>  6 Mol Biol Cell 24 12 Jun 2013 Journal Article,Research Support, N.I.H., Extramural                                                                                                                                                                                                                                                                                                                                                                                         |
| vav2     | cdc42     | <a href="http://www.ncbi.nlm.nih.gov/entrez/query.fcgi?cmd=Retrieve&amp;db=pubmed&amp;dopt=Abstract&amp;list_uids=23615439">http://www.ncbi.nlm.nih.gov/entrez/query.fcgi?cmd=Retrieve&amp;db=pubmed&amp;dopt=Abstract&amp;list_uids=23615439</a>  6 Mol Biol Cell 24 12 Jun 2013 Journal Article,Research Support, N.I.H., Extramural                                                                                                                                                                                                                                                                                                                                                                                         |
| vav2     | pklr      | <a href="http://www.ncbi.nlm.nih.gov/entrez/query.fcgi?cmd=Retrieve&amp;db=pubmed&amp;dopt=Abstract&amp;list_uids=23615439">http://www.ncbi.nlm.nih.gov/entrez/query.fcgi?cmd=Retrieve&amp;db=pubmed&amp;dopt=Abstract&amp;list_uids=23615439</a>  6 Mol Biol Cell 24 12 Jun 2013 Journal Article,Research Support, N.I.H., Extramural                                                                                                                                                                                                                                                                                                                                                                                         |
| vav2     | git2      | <a href="http://www.ncbi.nlm.nih.gov/entrez/query.fcgi?cmd=Retrieve&amp;db=pubmed&amp;dopt=Abstract&amp;list_uids=23615439">http://www.ncbi.nlm.nih.gov/entrez/query.fcgi?cmd=Retrieve&amp;db=pubmed&amp;dopt=Abstract&amp;list_uids=23615439</a>  6 Mol Biol Cell 24 12 Jun 2013 Journal Article,Research Support, N.I.H., Extramural                                                                                                                                                                                                                                                                                                                                                                                         |
| arhgef2  | rhoa      | <a href="http://www.ncbi.nlm.nih.gov/entrez/query.fcgi?cmd=Retrieve&amp;db=pubmed&amp;dopt=Abstract&amp;list_uids=23615439">http://www.ncbi.nlm.nih.gov/entrez/query.fcgi?cmd=Retrieve&amp;db=pubmed&amp;dopt=Abstract&amp;list_uids=23615439</a>  6 Mol Biol Cell 24 12 Jun 2013 Journal Article,Research Support, N.I.H., Extramural  <a href="http://www.ncbi.nlm.nih.gov/entrez/query.fcgi?cmd=Retrieve&amp;db=pubmed&amp;dopt=Abstract&amp;list_uids=22949735">http://www.ncbi.nlm.nih.gov/entrez/query.fcgi?cmd=Retrieve&amp;db=pubmed&amp;dopt=Abstract&amp;list_uids=22949735</a>  6 Sci Signal 5 240 Sep 2012 Comparative Study,Journal Article,Research Support, N.I.H., Extramural,Research Support, Non-U.S. Gov't |
| arhgef2  | cdc42     | <a href="http://www.ncbi.nlm.nih.gov/entrez/query.fcgi?cmd=Retrieve&amp;db=pubmed&amp;dopt=Abstract&amp;list_uids=23615439">http://www.ncbi.nlm.nih.gov/entrez/query.fcgi?cmd=Retrieve&amp;db=pubmed&amp;dopt=Abstract&amp;list_uids=23615439</a>  6 Mol Biol Cell 24 12 Jun 2013 Journal Article,Research Support, N.I.H., Extramural                                                                                                                                                                                                                                                                                                                                                                                         |
| arhgef2  | pklr      | <a href="http://www.ncbi.nlm.nih.gov/entrez/query.fcgi?cmd=Retrieve&amp;db=pubmed&amp;dopt=Abstract&amp;list_uids=23615439">http://www.ncbi.nlm.nih.gov/entrez/query.fcgi?cmd=Retrieve&amp;db=pubmed&amp;dopt=Abstract&amp;list_uids=23615439</a>  6 Mol Biol Cell 24 12 Jun 2013 Journal Article,Research Support, N.I.H., Extramural                                                                                                                                                                                                                                                                                                                                                                                         |
| arhgef2  | git2      | <a href="http://www.ncbi.nlm.nih.gov/entrez/query.fcgi?cmd=Retrieve&amp;db=pubmed&amp;dopt=Abstract&amp;list_uids=23615439">http://www.ncbi.nlm.nih.gov/entrez/query.fcgi?cmd=Retrieve&amp;db=pubmed&amp;dopt=Abstract&amp;list_uids=23615439</a>  6 Mol Biol Cell 24 12 Jun 2013 Journal Article,Research Support, N.I.H., Extramural                                                                                                                                                                                                                                                                                                                                                                                         |
| rac1     | pklr      | <a href="http://www.ncbi.nlm.nih.gov/entrez/query.fcgi?cmd=Retrieve&amp;db=pubmed&amp;dopt=Abstract&amp;list_uids=23615439">http://www.ncbi.nlm.nih.gov/entrez/query.fcgi?cmd=Retrieve&amp;db=pubmed&amp;dopt=Abstract&amp;list_uids=23615439</a>  6 Mol Biol                                                                                                                                                                                                                                                                                                                                                                                                                                                                  |

|         |         |                                                                                                                                                                                                                                                                                                                                                                                                                                                                                                                                                                                                                                                                                 |
|---------|---------|---------------------------------------------------------------------------------------------------------------------------------------------------------------------------------------------------------------------------------------------------------------------------------------------------------------------------------------------------------------------------------------------------------------------------------------------------------------------------------------------------------------------------------------------------------------------------------------------------------------------------------------------------------------------------------|
|         |         | Cell 24 12 Jun 2013 Journal Article,Research Support, N.I.H., Extramural                                                                                                                                                                                                                                                                                                                                                                                                                                                                                                                                                                                                        |
| rac1    | git2    | <a href="http://www.ncbi.nlm.nih.gov/entrez/query.fcgi?cmd=Retrieve&amp;db=pubmed&amp;dopt=Abstract&amp;list_uids=23615439">http://www.ncbi.nlm.nih.gov/entrez/query.fcgi?cmd=Retrieve&amp;db=pubmed&amp;dopt=Abstract&amp;list_uids=23615439</a>  6 Mol Biol Cell 24 12 Jun 2013 Journal Article,Research Support, N.I.H., Extramural                                                                                                                                                                                                                                                                                                                                          |
| rhoa    | pklr    | <a href="http://www.ncbi.nlm.nih.gov/entrez/query.fcgi?cmd=Retrieve&amp;db=pubmed&amp;dopt=Abstract&amp;list_uids=23615439">http://www.ncbi.nlm.nih.gov/entrez/query.fcgi?cmd=Retrieve&amp;db=pubmed&amp;dopt=Abstract&amp;list_uids=23615439</a>  6 Mol Biol Cell 24 12 Jun 2013 Journal Article,Research Support, N.I.H., Extramural                                                                                                                                                                                                                                                                                                                                          |
| rhoa    | git2    | <a href="http://www.ncbi.nlm.nih.gov/entrez/query.fcgi?cmd=Retrieve&amp;db=pubmed&amp;dopt=Abstract&amp;list_uids=23615439">http://www.ncbi.nlm.nih.gov/entrez/query.fcgi?cmd=Retrieve&amp;db=pubmed&amp;dopt=Abstract&amp;list_uids=23615439</a>  6 Mol Biol Cell 24 12 Jun 2013 Journal Article,Research Support, N.I.H., Extramural                                                                                                                                                                                                                                                                                                                                          |
| cdc42   | pklr    | <a href="http://www.ncbi.nlm.nih.gov/entrez/query.fcgi?cmd=Retrieve&amp;db=pubmed&amp;dopt=Abstract&amp;list_uids=23615439">http://www.ncbi.nlm.nih.gov/entrez/query.fcgi?cmd=Retrieve&amp;db=pubmed&amp;dopt=Abstract&amp;list_uids=23615439</a>  6 Mol Biol Cell 24 12 Jun 2013 Journal Article,Research Support, N.I.H., Extramural                                                                                                                                                                                                                                                                                                                                          |
| cdc42   | git2    | <a href="http://www.ncbi.nlm.nih.gov/entrez/query.fcgi?cmd=Retrieve&amp;db=pubmed&amp;dopt=Abstract&amp;list_uids=23615439">http://www.ncbi.nlm.nih.gov/entrez/query.fcgi?cmd=Retrieve&amp;db=pubmed&amp;dopt=Abstract&amp;list_uids=23615439</a>  6 Mol Biol Cell 24 12 Jun 2013 Journal Article,Research Support, N.I.H., Extramural                                                                                                                                                                                                                                                                                                                                          |
| pklr    | git2    | <a href="http://www.ncbi.nlm.nih.gov/entrez/query.fcgi?cmd=Retrieve&amp;db=pubmed&amp;dopt=Abstract&amp;list_uids=23615439">http://www.ncbi.nlm.nih.gov/entrez/query.fcgi?cmd=Retrieve&amp;db=pubmed&amp;dopt=Abstract&amp;list_uids=23615439</a>  6 Mol Biol Cell 24 12 Jun 2013 Journal Article,Research Support, N.I.H., Extramural                                                                                                                                                                                                                                                                                                                                          |
| pklr    | egf     | <a href="http://www.ncbi.nlm.nih.gov/entrez/query.fcgi?cmd=Retrieve&amp;db=pubmed&amp;dopt=Abstract&amp;list_uids=23615439">http://www.ncbi.nlm.nih.gov/entrez/query.fcgi?cmd=Retrieve&amp;db=pubmed&amp;dopt=Abstract&amp;list_uids=23615439</a>  6 Mol Biol Cell 24 12 Jun 2013 Journal Article,Research Support, N.I.H., Extramural                                                                                                                                                                                                                                                                                                                                          |
| vav2    | egf     | <a href="http://www.ncbi.nlm.nih.gov/entrez/query.fcgi?cmd=Retrieve&amp;db=pubmed&amp;dopt=Abstract&amp;list_uids=23615439">http://www.ncbi.nlm.nih.gov/entrez/query.fcgi?cmd=Retrieve&amp;db=pubmed&amp;dopt=Abstract&amp;list_uids=23615439</a>  6 Mol Biol Cell 24 12 Jun 2013 Journal Article,Research Support, N.I.H., Extramural                                                                                                                                                                                                                                                                                                                                          |
| rac1    | egf     | <a href="http://www.ncbi.nlm.nih.gov/entrez/query.fcgi?cmd=Retrieve&amp;db=pubmed&amp;dopt=Abstract&amp;list_uids=23615439">http://www.ncbi.nlm.nih.gov/entrez/query.fcgi?cmd=Retrieve&amp;db=pubmed&amp;dopt=Abstract&amp;list_uids=23615439</a>  6 Mol Biol Cell 24 12 Jun 2013 Journal Article,Research Support, N.I.H., Extramural                                                                                                                                                                                                                                                                                                                                          |
| arhgef2 | egf     | <a href="http://www.ncbi.nlm.nih.gov/entrez/query.fcgi?cmd=Retrieve&amp;db=pubmed&amp;dopt=Abstract&amp;list_uids=23615439">http://www.ncbi.nlm.nih.gov/entrez/query.fcgi?cmd=Retrieve&amp;db=pubmed&amp;dopt=Abstract&amp;list_uids=23615439</a>  6 Mol Biol Cell 24 12 Jun 2013 Journal Article,Research Support, N.I.H., Extramural                                                                                                                                                                                                                                                                                                                                          |
| fos     | mirn23b | <a href="http://www.ncbi.nlm.nih.gov/entrez/query.fcgi?cmd=Retrieve&amp;db=pubmed&amp;dopt=Abstract&amp;list_uids=23580553">http://www.ncbi.nlm.nih.gov/entrez/query.fcgi?cmd=Retrieve&amp;db=pubmed&amp;dopt=Abstract&amp;list_uids=23580553</a>  6 Nucleic Acids Res 41 10 May 2013 Journal Article,Research Support, Non-U.S. Gov't                                                                                                                                                                                                                                                                                                                                          |
| mapk3   | map2k1  | <a href="http://www.ncbi.nlm.nih.gov/entrez/query.fcgi?cmd=Retrieve&amp;db=pubmed&amp;dopt=Abstract&amp;list_uids=23549785">http://www.ncbi.nlm.nih.gov/entrez/query.fcgi?cmd=Retrieve&amp;db=pubmed&amp;dopt=Abstract&amp;list_uids=23549785</a>  6 J Cell Sci 126 Pt 11 Jun 2013 Journal Article,Research Support, Non-U.S. Gov't  <a href="http://www.ncbi.nlm.nih.gov/entrez/query.fcgi?cmd=Retrieve&amp;db=pubmed&amp;dopt=Abstract&amp;list_uids=23562553">http://www.ncbi.nlm.nih.gov/entrez/query.fcgi?cmd=Retrieve&amp;db=pubmed&amp;dopt=Abstract&amp;list_uids=23562553</a>  6 Biochim Biophys Acta 1830 8 Aug 2013 Journal Article,Research Support, Non-U.S. Gov't |
| mapk1   | mapk3   | <a href="http://www.ncbi.nlm.nih.gov/entrez/query.fcgi?cmd=Retrieve&amp;db=pubmed&amp;dopt=Abstract&amp;list_uids=23549785">http://www.ncbi.nlm.nih.gov/entrez/query.fcgi?cmd=Retrieve&amp;db=pubmed&amp;dopt=Abstract&amp;list_uids=23549785</a>  6 J Cell Sci 126 Pt 11 Jun 2013 Journal Article,Research Support, Non-U.S. Gov't                                                                                                                                                                                                                                                                                                                                             |
| mapk1   | hgf     | <a href="http://www.ncbi.nlm.nih.gov/entrez/query.fcgi?cmd=Retrieve&amp;db=pubmed&amp;dopt=Abstract&amp;list_uids=23549785">http://www.ncbi.nlm.nih.gov/entrez/query.fcgi?cmd=Retrieve&amp;db=pubmed&amp;dopt=Abstract&amp;list_uids=23549785</a>  6 J Cell Sci 126 Pt 11 Jun 2013 Journal Article,Research Support, Non-U.S. Gov't                                                                                                                                                                                                                                                                                                                                             |
| mapk3   | hgf     | <a href="http://www.ncbi.nlm.nih.gov/entrez/query.fcgi?cmd=Retrieve&amp;db=pubmed&amp;dopt=Abstract&amp;list_uids=23549785">http://www.ncbi.nlm.nih.gov/entrez/query.fcgi?cmd=Retrieve&amp;db=pubmed&amp;dopt=Abstract&amp;list_uids=23549785</a>  6 J Cell Sci 126 Pt 11 Jun 2013 Journal Article,Research Support, Non-U.S. Gov't                                                                                                                                                                                                                                                                                                                                             |
| hgf     | ephb2   | <a href="http://www.ncbi.nlm.nih.gov/entrez/query.fcgi?cmd=Retrieve&amp;db=pubmed&amp;dopt=Abstract&amp;list_uids=23549785">http://www.ncbi.nlm.nih.gov/entrez/query.fcgi?cmd=Retrieve&amp;db=pubmed&amp;dopt=Abstract&amp;list_uids=23549785</a>  6 J Cell Sci 126 Pt 11 Jun 2013 Journal Article,Research Support, Non-U.S. Gov't                                                                                                                                                                                                                                                                                                                                             |

|         |         |                                                                                                                                                                                                                                                                                                                                                                                                                                                                                                                                                                                                                                                                                                                                                |
|---------|---------|------------------------------------------------------------------------------------------------------------------------------------------------------------------------------------------------------------------------------------------------------------------------------------------------------------------------------------------------------------------------------------------------------------------------------------------------------------------------------------------------------------------------------------------------------------------------------------------------------------------------------------------------------------------------------------------------------------------------------------------------|
| hgf     | map2k1  | <a href="http://www.ncbi.nlm.nih.gov/entrez/query.fcgi?cmd=Retrieve&amp;db=pubmed&amp;dopt=Abstract&amp;list_uids=23549785">http://www.ncbi.nlm.nih.gov/entrez/query.fcgi?cmd=Retrieve&amp;db=pubmed&amp;dopt=Abstract&amp;list_uids=23549785</a>  6 J Cell Sci 126 Pt 11 Jun 2013 Journal Article,Research Support, Non-U.S. Gov't                                                                                                                                                                                                                                                                                                                                                                                                            |
| mapk3   | ephb2   | <a href="http://www.ncbi.nlm.nih.gov/entrez/query.fcgi?cmd=Retrieve&amp;db=pubmed&amp;dopt=Abstract&amp;list_uids=23549785">http://www.ncbi.nlm.nih.gov/entrez/query.fcgi?cmd=Retrieve&amp;db=pubmed&amp;dopt=Abstract&amp;list_uids=23549785</a>  6 J Cell Sci 126 Pt 11 Jun 2013 Journal Article,Research Support, Non-U.S. Gov't                                                                                                                                                                                                                                                                                                                                                                                                            |
| ephb2   | map2k1  | <a href="http://www.ncbi.nlm.nih.gov/entrez/query.fcgi?cmd=Retrieve&amp;db=pubmed&amp;dopt=Abstract&amp;list_uids=23549785">http://www.ncbi.nlm.nih.gov/entrez/query.fcgi?cmd=Retrieve&amp;db=pubmed&amp;dopt=Abstract&amp;list_uids=23549785</a>  6 J Cell Sci 126 Pt 11 Jun 2013 Journal Article,Research Support, Non-U.S. Gov't                                                                                                                                                                                                                                                                                                                                                                                                            |
| tnfsf13 | swap70  | <a href="http://www.ncbi.nlm.nih.gov/entrez/query.fcgi?cmd=Retrieve&amp;db=pubmed&amp;dopt=Abstract&amp;list_uids=23544157">http://www.ncbi.nlm.nih.gov/entrez/query.fcgi?cmd=Retrieve&amp;db=pubmed&amp;dopt=Abstract&amp;list_uids=23544157</a>  6 PLoS One 8 3  2013 Journal Article,Research Support, Non-U.S. Gov't                                                                                                                                                                                                                                                                                                                                                                                                                       |
| tacstd2 | pak4    | <a href="http://www.ncbi.nlm.nih.gov/entrez/query.fcgi?cmd=Retrieve&amp;db=pubmed&amp;dopt=Abstract&amp;list_uids=23536555">http://www.ncbi.nlm.nih.gov/entrez/query.fcgi?cmd=Retrieve&amp;db=pubmed&amp;dopt=Abstract&amp;list_uids=23536555</a>  6 Cancer Res 73 10 May 2013 Journal Article,Research Support, N.I.H., Extramural,Research Support, Non-U.S. Gov't                                                                                                                                                                                                                                                                                                                                                                           |
| ptpn11  | egf     | <a href="http://www.ncbi.nlm.nih.gov/entrez/query.fcgi?cmd=Retrieve&amp;db=pubmed&amp;dopt=Abstract&amp;list_uids=23512980">http://www.ncbi.nlm.nih.gov/entrez/query.fcgi?cmd=Retrieve&amp;db=pubmed&amp;dopt=Abstract&amp;list_uids=23512980</a>  6 Mol Cancer Res 11 6 Jun 2013 Journal Article,Research Support, N.I.H., Extramural,Research Support, U.S. Gov't, Non-P.H.S.                                                                                                                                                                                                                                                                                                                                                                |
| akt1    | sla     | <a href="http://www.ncbi.nlm.nih.gov/entrez/query.fcgi?cmd=Retrieve&amp;db=pubmed&amp;dopt=Abstract&amp;list_uids=23505566">http://www.ncbi.nlm.nih.gov/entrez/query.fcgi?cmd=Retrieve&amp;db=pubmed&amp;dopt=Abstract&amp;list_uids=23505566</a>  6 PLoS One 8 3  2013 Journal Article,Research Support, Non-U.S. Gov't                                                                                                                                                                                                                                                                                                                                                                                                                       |
| akt1    | bmp2    | <a href="http://www.ncbi.nlm.nih.gov/entrez/query.fcgi?cmd=Retrieve&amp;db=pubmed&amp;dopt=Abstract&amp;list_uids=23505566">http://www.ncbi.nlm.nih.gov/entrez/query.fcgi?cmd=Retrieve&amp;db=pubmed&amp;dopt=Abstract&amp;list_uids=23505566</a>  6 PLoS One 8 3  2013 Journal Article,Research Support, Non-U.S. Gov't                                                                                                                                                                                                                                                                                                                                                                                                                       |
| s100a6  | rb1     | <a href="http://www.ncbi.nlm.nih.gov/entrez/query.fcgi?cmd=Retrieve&amp;db=pubmed&amp;dopt=Abstract&amp;list_uids=23485561">http://www.ncbi.nlm.nih.gov/entrez/query.fcgi?cmd=Retrieve&amp;db=pubmed&amp;dopt=Abstract&amp;list_uids=23485561</a>  6 Mol Biol Cell 24 9 May 2013 Journal Article,Research Support, Non-U.S. Gov't                                                                                                                                                                                                                                                                                                                                                                                                              |
| plau    | ptk2    | <a href="http://www.ncbi.nlm.nih.gov/entrez/query.fcgi?cmd=Retrieve&amp;db=pubmed&amp;dopt=Abstract&amp;list_uids=23485561">http://www.ncbi.nlm.nih.gov/entrez/query.fcgi?cmd=Retrieve&amp;db=pubmed&amp;dopt=Abstract&amp;list_uids=23485561</a>  6 Mol Biol Cell 24 9 May 2013 Journal Article,Research Support, Non-U.S. Gov't                                                                                                                                                                                                                                                                                                                                                                                                              |
| plaur   | ptk2    | <a href="http://www.ncbi.nlm.nih.gov/entrez/query.fcgi?cmd=Retrieve&amp;db=pubmed&amp;dopt=Abstract&amp;list_uids=23485561">http://www.ncbi.nlm.nih.gov/entrez/query.fcgi?cmd=Retrieve&amp;db=pubmed&amp;dopt=Abstract&amp;list_uids=23485561</a>  6 Mol Biol Cell 24 9 May 2013 Journal Article,Research Support, Non-U.S. Gov't                                                                                                                                                                                                                                                                                                                                                                                                              |
| rb1     | ptk2    | <a href="http://www.ncbi.nlm.nih.gov/entrez/query.fcgi?cmd=Retrieve&amp;db=pubmed&amp;dopt=Abstract&amp;list_uids=23485561">http://www.ncbi.nlm.nih.gov/entrez/query.fcgi?cmd=Retrieve&amp;db=pubmed&amp;dopt=Abstract&amp;list_uids=23485561</a>  6 Mol Biol Cell 24 9 May 2013 Journal Article,Research Support, Non-U.S. Gov't                                                                                                                                                                                                                                                                                                                                                                                                              |
| s100a6  | ptk2    | <a href="http://www.ncbi.nlm.nih.gov/entrez/query.fcgi?cmd=Retrieve&amp;db=pubmed&amp;dopt=Abstract&amp;list_uids=23485561">http://www.ncbi.nlm.nih.gov/entrez/query.fcgi?cmd=Retrieve&amp;db=pubmed&amp;dopt=Abstract&amp;list_uids=23485561</a>  6 Mol Biol Cell 24 9 May 2013 Journal Article,Research Support, Non-U.S. Gov't                                                                                                                                                                                                                                                                                                                                                                                                              |
| rap1a   | apbb1ip | <a href="http://www.ncbi.nlm.nih.gov/entrez/query.fcgi?cmd=Retrieve&amp;db=pubmed&amp;dopt=Abstract&amp;list_uids=23389036">http://www.ncbi.nlm.nih.gov/entrez/query.fcgi?cmd=Retrieve&amp;db=pubmed&amp;dopt=Abstract&amp;list_uids=23389036</a>  6 J Biol Chem 288 12 Mar 2013 Journal Article,Research Support, N.I.H., Extramural,Research Support, Non-U.S. Gov't  <a href="http://www.ncbi.nlm.nih.gov/entrez/query.fcgi?cmd=Retrieve&amp;db=pubmed&amp;dopt=Abstract&amp;list_uids=23468527">http://www.ncbi.nlm.nih.gov/entrez/query.fcgi?cmd=Retrieve&amp;db=pubmed&amp;dopt=Abstract&amp;list_uids=23468527</a>  6 Mol Biol Cell 24 9 May 2013 Journal Article,Research Support, N.I.H., Extramural,Research Support, Non-U.S. Gov't |
| actin   | actn4   | <a href="http://www.ncbi.nlm.nih.gov/entrez/query.fcgi?cmd=Retrieve&amp;db=pubmed&amp;dopt=Abstract&amp;list_uids=23466492">http://www.ncbi.nlm.nih.gov/entrez/query.fcgi?cmd=Retrieve&amp;db=pubmed&amp;dopt=Abstract&amp;list_uids=23466492</a>  6 Int J Biochem Cell Biol 45 6 Jun 2013 Journal Article,Research Support, N.I.H., Extramural                                                                                                                                                                                                                                                                                                                                                                                                |
| ros1    | rac1    | <a href="http://www.ncbi.nlm.nih.gov/entrez/query.fcgi?cmd=Retrieve&amp;db=pubmed&amp;dopt=Abstract&amp;list_uids=23465490">http://www.ncbi.nlm.nih.gov/entrez/query.fcgi?cmd=Retrieve&amp;db=pubmed&amp;dopt=Abstract&amp;list_uids=23465490</a>  6 Biomaterials 34 15 May 2013 Journal Article,Research Support, N.I.H., Extramural,Research Support, Non-U.S. Gov't,Research Support, U.S. Gov't, Non-P.H.S.                                                                                                                                                                                                                                                                                                                                |
| rhoa    | ros1    | <a href="http://www.ncbi.nlm.nih.gov/entrez/query.fcgi?cmd=Retrieve&amp;db=pubmed&amp;dopt=Abstract&amp;list_uids=23465490">http://www.ncbi.nlm.nih.gov/entrez/query.fcgi?cmd=Retrieve&amp;db=pubmed&amp;dopt=Abstract&amp;list_uids=23465490</a>  6 Biomater                                                                                                                                                                                                                                                                                                                                                                                                                                                                                  |

|         |       |                                                                                                                                                                                                                                                                                                                                                                             |
|---------|-------|-----------------------------------------------------------------------------------------------------------------------------------------------------------------------------------------------------------------------------------------------------------------------------------------------------------------------------------------------------------------------------|
|         |       | ials 34 15 May 2013 Journal Article,Research Support, N.I.H., Extramural,Research Support, Non-U.S. Gov't,Research Support, U.S. Gov't, Non-P.H.S.                                                                                                                                                                                                                          |
| mirn145 | klf4  | <a href="http://www.ncbi.nlm.nih.gov/entrez/query.fcgi?cmd=Retrieve&amp;db=pubmed&amp;dopt=Abstract&amp;list_uids=23457217">http://www.ncbi.nlm.nih.gov/entrez/query.fcgi?cmd=Retrieve&amp;db=pubmed&amp;dopt=Abstract&amp;list_uids=23457217</a>  6 FASEB J 27 6 Jun 2013 Journal Article,Research Support, N.I.H., Extramural,Research Support, Non-U.S. Gov't            |
| src     | arf6  | <a href="http://www.ncbi.nlm.nih.gov/entrez/query.fcgi?cmd=Retrieve&amp;db=pubmed&amp;dopt=Abstract&amp;list_uids=23453597">http://www.ncbi.nlm.nih.gov/entrez/query.fcgi?cmd=Retrieve&amp;db=pubmed&amp;dopt=Abstract&amp;list_uids=23453597</a>  6 Dev Cell 24 5 Mar 2013 Journal Article,Research Support, Non-U.S. Gov't                                                |
| nck1    | actin | <a href="http://www.ncbi.nlm.nih.gov/entrez/query.fcgi?cmd=Retrieve&amp;db=pubmed&amp;dopt=Abstract&amp;list_uids=23444376">http://www.ncbi.nlm.nih.gov/entrez/query.fcgi?cmd=Retrieve&amp;db=pubmed&amp;dopt=Abstract&amp;list_uids=23444376</a>  6 J Cell Sci 126 Pt 7 Apr 2013 Journal Article,Research Support, Non-U.S. Gov't,Research Support, U.S. Gov't, Non-P.H.S. |
| rhoa    | nck1  | <a href="http://www.ncbi.nlm.nih.gov/entrez/query.fcgi?cmd=Retrieve&amp;db=pubmed&amp;dopt=Abstract&amp;list_uids=23444376">http://www.ncbi.nlm.nih.gov/entrez/query.fcgi?cmd=Retrieve&amp;db=pubmed&amp;dopt=Abstract&amp;list_uids=23444376</a>  6 J Cell Sci 126 Pt 7 Apr 2013 Journal Article,Research Support, Non-U.S. Gov't,Research Support, U.S. Gov't, Non-P.H.S. |
| myh14   | nck1  | <a href="http://www.ncbi.nlm.nih.gov/entrez/query.fcgi?cmd=Retrieve&amp;db=pubmed&amp;dopt=Abstract&amp;list_uids=23444376">http://www.ncbi.nlm.nih.gov/entrez/query.fcgi?cmd=Retrieve&amp;db=pubmed&amp;dopt=Abstract&amp;list_uids=23444376</a>  6 J Cell Sci 126 Pt 7 Apr 2013 Journal Article,Research Support, Non-U.S. Gov't,Research Support, U.S. Gov't, Non-P.H.S. |
| hcc     | hspg2 | <a href="http://www.ncbi.nlm.nih.gov/entrez/query.fcgi?cmd=Retrieve&amp;db=pubmed&amp;dopt=Abstract&amp;list_uids=23425030">http://www.ncbi.nlm.nih.gov/entrez/query.fcgi?cmd=Retrieve&amp;db=pubmed&amp;dopt=Abstract&amp;list_uids=23425030</a>  6 J Gastroenterol Hepatol 28 6 Jun 2013 Journal Article,Research Support, Non-U.S. Gov't                                 |
| hcc     | hlf   | <a href="http://www.ncbi.nlm.nih.gov/entrez/query.fcgi?cmd=Retrieve&amp;db=pubmed&amp;dopt=Abstract&amp;list_uids=23425030">http://www.ncbi.nlm.nih.gov/entrez/query.fcgi?cmd=Retrieve&amp;db=pubmed&amp;dopt=Abstract&amp;list_uids=23425030</a>  6 J Gastroenterol Hepatol 28 6 Jun 2013 Journal Article,Research Support, Non-U.S. Gov't                                 |
| hspg2   | hlf   | <a href="http://www.ncbi.nlm.nih.gov/entrez/query.fcgi?cmd=Retrieve&amp;db=pubmed&amp;dopt=Abstract&amp;list_uids=23425030">http://www.ncbi.nlm.nih.gov/entrez/query.fcgi?cmd=Retrieve&amp;db=pubmed&amp;dopt=Abstract&amp;list_uids=23425030</a>  6 J Gastroenterol Hepatol 28 6 Jun 2013 Journal Article,Research Support, Non-U.S. Gov't                                 |
| cdkn1a  | pak2  | <a href="http://www.ncbi.nlm.nih.gov/entrez/query.fcgi?cmd=Retrieve&amp;db=pubmed&amp;dopt=Abstract&amp;list_uids=23425030">http://www.ncbi.nlm.nih.gov/entrez/query.fcgi?cmd=Retrieve&amp;db=pubmed&amp;dopt=Abstract&amp;list_uids=23425030</a>  6 J Gastroenterol Hepatol 28 6 Jun 2013 Journal Article,Research Support, Non-U.S. Gov't                                 |
| pak2    | hcc   | <a href="http://www.ncbi.nlm.nih.gov/entrez/query.fcgi?cmd=Retrieve&amp;db=pubmed&amp;dopt=Abstract&amp;list_uids=23425030">http://www.ncbi.nlm.nih.gov/entrez/query.fcgi?cmd=Retrieve&amp;db=pubmed&amp;dopt=Abstract&amp;list_uids=23425030</a>  6 J Gastroenterol Hepatol 28 6 Jun 2013 Journal Article,Research Support, Non-U.S. Gov't                                 |
| pak2    | akt1  | <a href="http://www.ncbi.nlm.nih.gov/entrez/query.fcgi?cmd=Retrieve&amp;db=pubmed&amp;dopt=Abstract&amp;list_uids=23425030">http://www.ncbi.nlm.nih.gov/entrez/query.fcgi?cmd=Retrieve&amp;db=pubmed&amp;dopt=Abstract&amp;list_uids=23425030</a>  6 J Gastroenterol Hepatol 28 6 Jun 2013 Journal Article,Research Support, Non-U.S. Gov't                                 |
| hcc     | akt1  | <a href="http://www.ncbi.nlm.nih.gov/entrez/query.fcgi?cmd=Retrieve&amp;db=pubmed&amp;dopt=Abstract&amp;list_uids=23425030">http://www.ncbi.nlm.nih.gov/entrez/query.fcgi?cmd=Retrieve&amp;db=pubmed&amp;dopt=Abstract&amp;list_uids=23425030</a>  6 J Gastroenterol Hepatol 28 6 Jun 2013 Journal Article,Research Support, Non-U.S. Gov't                                 |
| abcb6   | gba   | <a href="http://www.ncbi.nlm.nih.gov/entrez/query.fcgi?cmd=Retrieve&amp;db=pubmed&amp;dopt=Abstract&amp;list_uids=23424639">http://www.ncbi.nlm.nih.gov/entrez/query.fcgi?cmd=Retrieve&amp;db=pubmed&amp;dopt=Abstract&amp;list_uids=23424639</a>  6 PLoS One 8 2 2013 Comparative Study,Journal Article,Research Support, Non-U.S. Gov't                                   |
| il1b    | il8   | <a href="http://www.ncbi.nlm.nih.gov/entrez/query.fcgi?cmd=Retrieve&amp;db=pubmed&amp;dopt=Abstract&amp;list_uids=23399841">http://www.ncbi.nlm.nih.gov/entrez/query.fcgi?cmd=Retrieve&amp;db=pubmed&amp;dopt=Abstract&amp;list_uids=23399841</a>  6 Cell Immunol 280 2 Dec 2012 Journal Article,Research Support, N.I.H., Extramural,Research Support, Non-U.S. Gov't      |
| il1b    | ccl2  | <a href="http://www.ncbi.nlm.nih.gov/entrez/query.fcgi?cmd=Retrieve&amp;db=pubmed&amp;dopt=Abstract&amp;list_uids=23399841">http://www.ncbi.nlm.nih.gov/entrez/query.fcgi?cmd=Retrieve&amp;db=pubmed&amp;dopt=Abstract&amp;list_uids=23399841</a>  6 Cell Immunol 280 2 Dec 2012 Journal Article,Research Support, N.I.H., Extramural,Research Support, Non-U.S. Gov't      |
| il8     | ccl2  | <a href="http://www.ncbi.nlm.nih.gov/entrez/query.fcgi?cmd=Retrieve&amp;db=pubmed&amp;dopt=Abstract&amp;list_uids=23399841">http://www.ncbi.nlm.nih.gov/entrez/query.fcgi?cmd=Retrieve&amp;db=pubmed&amp;dopt=Abstract&amp;list_uids=23399841</a>  6 Cell Immunol 280 2 Dec 2012 Journal Article,Research Support, N.I.H., Extramural,Research Support, Non-U.S. Gov't      |
| il1b    | mapk8 | <a href="http://www.ncbi.nlm.nih.gov/entrez/query.fcgi?cmd=Retrieve&amp;db=pubmed&amp;dopt=Abstract&amp;list_uids=23399841">http://www.ncbi.nlm.nih.gov/entrez/query.fcgi?cmd=Retrieve&amp;db=pubmed&amp;dopt=Abstract&amp;list_uids=23399841</a>  6 Cell Immunol 280 2 Dec 2012 Journal Article,Research Support, N.I.H., Extramural,Research Support, Non-U.S. Gov't      |



|         |        |                                                                                                                                                                                                                                                                                                                                                                                                                                                                                                                                                                                                                                                                |
|---------|--------|----------------------------------------------------------------------------------------------------------------------------------------------------------------------------------------------------------------------------------------------------------------------------------------------------------------------------------------------------------------------------------------------------------------------------------------------------------------------------------------------------------------------------------------------------------------------------------------------------------------------------------------------------------------|
| il1b    | fos    | <a href="http://www.ncbi.nlm.nih.gov/entrez/query.fcgi?cmd=Retrieve&amp;db=pubmed&amp;dopt=Abstract&amp;list_uids=23399841">http://www.ncbi.nlm.nih.gov/entrez/query.fcgi?cmd=Retrieve&amp;db=pubmed&amp;dopt=Abstract&amp;list_uids=23399841</a>  6 Cell Immunol 280 2 Dec 2012 Journal Article,Research Support, N.I.H., Extramural,Research Support, Non-U.S. Gov't                                                                                                                                                                                                                                                                                         |
| mmp14   | mmrn1  | <a href="http://www.ncbi.nlm.nih.gov/entrez/query.fcgi?cmd=Retrieve&amp;db=pubmed&amp;dopt=Abstract&amp;list_uids=22291036">http://www.ncbi.nlm.nih.gov/entrez/query.fcgi?cmd=Retrieve&amp;db=pubmed&amp;dopt=Abstract&amp;list_uids=22291036</a>  6 J Cell Biol 196 3 Feb 2012 Journal Article,Research Support, N.I.H., Extramural  <a href="http://www.ncbi.nlm.nih.gov/entrez/query.fcgi?cmd=Retrieve&amp;db=pubmed&amp;dopt=Abstract&amp;list_uids=23382803">http://www.ncbi.nlm.nih.gov/entrez/query.fcgi?cmd=Retrieve&amp;db=pubmed&amp;dopt=Abstract&amp;list_uids=23382803</a>  6 PLoS One 8 1  2013 Journal Article,Research Support, Non-U.S. Gov't |
| usp7    | tp53   | <a href="http://www.ncbi.nlm.nih.gov/entrez/query.fcgi?cmd=Retrieve&amp;db=pubmed&amp;dopt=Abstract&amp;list_uids=23382381">http://www.ncbi.nlm.nih.gov/entrez/query.fcgi?cmd=Retrieve&amp;db=pubmed&amp;dopt=Abstract&amp;list_uids=23382381</a>  6 J Biol Chem 288 11 Mar 2013 Journal Article,Research Support, N.I.H., Extramural,Research Support, Non-U.S. Gov't                                                                                                                                                                                                                                                                                         |
| myh14   | stim1  | <a href="http://www.ncbi.nlm.nih.gov/entrez/query.fcgi?cmd=Retrieve&amp;db=pubmed&amp;dopt=Abstract&amp;list_uids=23378028">http://www.ncbi.nlm.nih.gov/entrez/query.fcgi?cmd=Retrieve&amp;db=pubmed&amp;dopt=Abstract&amp;list_uids=23378028</a>  6 J Cell Sci 126 Pt 5 Mar 2013 Journal Article,Research Support, Non-U.S. Gov't                                                                                                                                                                                                                                                                                                                             |
| actin   | stim1  | <a href="http://www.ncbi.nlm.nih.gov/entrez/query.fcgi?cmd=Retrieve&amp;db=pubmed&amp;dopt=Abstract&amp;list_uids=23378028">http://www.ncbi.nlm.nih.gov/entrez/query.fcgi?cmd=Retrieve&amp;db=pubmed&amp;dopt=Abstract&amp;list_uids=23378028</a>  6 J Cell Sci 126 Pt 5 Mar 2013 Journal Article,Research Support, Non-U.S. Gov't                                                                                                                                                                                                                                                                                                                             |
| 3.6.4.1 | stim1  | <a href="http://www.ncbi.nlm.nih.gov/entrez/query.fcgi?cmd=Retrieve&amp;db=pubmed&amp;dopt=Abstract&amp;list_uids=23378028">http://www.ncbi.nlm.nih.gov/entrez/query.fcgi?cmd=Retrieve&amp;db=pubmed&amp;dopt=Abstract&amp;list_uids=23378028</a>  6 J Cell Sci 126 Pt 5 Mar 2013 Journal Article,Research Support, Non-U.S. Gov't                                                                                                                                                                                                                                                                                                                             |
| fas     | cdkn1a | <a href="http://www.ncbi.nlm.nih.gov/entrez/query.fcgi?cmd=Retrieve&amp;db=pubmed&amp;dopt=Abstract&amp;list_uids=23344455">http://www.ncbi.nlm.nih.gov/entrez/query.fcgi?cmd=Retrieve&amp;db=pubmed&amp;dopt=Abstract&amp;list_uids=23344455</a>  6 Toxins (Basel) 5 1 Jan 2013 Comparative Study,Journal Article,Research Support, Non-U.S. Gov't                                                                                                                                                                                                                                                                                                            |
| nanog   | sox2   | <a href="http://www.ncbi.nlm.nih.gov/entrez/query.fcgi?cmd=Retrieve&amp;db=pubmed&amp;dopt=Abstract&amp;list_uids=23329853">http://www.ncbi.nlm.nih.gov/entrez/query.fcgi?cmd=Retrieve&amp;db=pubmed&amp;dopt=Abstract&amp;list_uids=23329853</a>  6 J Mol Cell Biol 5 4 Aug 2013 Journal Article,Research Support, Non-U.S. Gov't                                                                                                                                                                                                                                                                                                                             |
| nanog   | pou5f1 | <a href="http://www.ncbi.nlm.nih.gov/entrez/query.fcgi?cmd=Retrieve&amp;db=pubmed&amp;dopt=Abstract&amp;list_uids=23329853">http://www.ncbi.nlm.nih.gov/entrez/query.fcgi?cmd=Retrieve&amp;db=pubmed&amp;dopt=Abstract&amp;list_uids=23329853</a>  6 J Mol Cell Biol 5 4 Aug 2013 Journal Article,Research Support, Non-U.S. Gov't                                                                                                                                                                                                                                                                                                                             |
| sox2    | pou5f1 | <a href="http://www.ncbi.nlm.nih.gov/entrez/query.fcgi?cmd=Retrieve&amp;db=pubmed&amp;dopt=Abstract&amp;list_uids=23329853">http://www.ncbi.nlm.nih.gov/entrez/query.fcgi?cmd=Retrieve&amp;db=pubmed&amp;dopt=Abstract&amp;list_uids=23329853</a>  6 J Mol Cell Biol 5 4 Aug 2013 Journal Article,Research Support, Non-U.S. Gov't                                                                                                                                                                                                                                                                                                                             |
| ctnnd1  | rac1   | <a href="http://www.ncbi.nlm.nih.gov/entrez/query.fcgi?cmd=Retrieve&amp;db=pubmed&amp;dopt=Abstract&amp;list_uids=23325790">http://www.ncbi.nlm.nih.gov/entrez/query.fcgi?cmd=Retrieve&amp;db=pubmed&amp;dopt=Abstract&amp;list_uids=23325790</a>  6 Mol Biol Cell 24 6 Mar 2013 Journal Article,Research Support, N.I.H., Extramural,Research Support, U.S. Gov't, Non-P.H.S.                                                                                                                                                                                                                                                                                 |
| frap1   | gal    | <a href="http://www.ncbi.nlm.nih.gov/entrez/query.fcgi?cmd=Retrieve&amp;db=pubmed&amp;dopt=Abstract&amp;list_uids=23296673">http://www.ncbi.nlm.nih.gov/entrez/query.fcgi?cmd=Retrieve&amp;db=pubmed&amp;dopt=Abstract&amp;list_uids=23296673</a>  6 Methods Mol Biol 965   2013 Journal Article,Research Support, Non-U.S. Gov't                                                                                                                                                                                                                                                                                                                              |
| frap1   | tp53   | <a href="http://www.ncbi.nlm.nih.gov/entrez/query.fcgi?cmd=Retrieve&amp;db=pubmed&amp;dopt=Abstract&amp;list_uids=23296673">http://www.ncbi.nlm.nih.gov/entrez/query.fcgi?cmd=Retrieve&amp;db=pubmed&amp;dopt=Abstract&amp;list_uids=23296673</a>  6 Methods Mol Biol 965   2013 Journal Article,Research Support, Non-U.S. Gov't                                                                                                                                                                                                                                                                                                                              |
| frap1   | cdkn1a | <a href="http://www.ncbi.nlm.nih.gov/entrez/query.fcgi?cmd=Retrieve&amp;db=pubmed&amp;dopt=Abstract&amp;list_uids=23296673">http://www.ncbi.nlm.nih.gov/entrez/query.fcgi?cmd=Retrieve&amp;db=pubmed&amp;dopt=Abstract&amp;list_uids=23296673</a>  6 Methods Mol Biol 965   2013 Journal Article,Research Support, Non-U.S. Gov't                                                                                                                                                                                                                                                                                                                              |
| frap1   | cdkn2a | <a href="http://www.ncbi.nlm.nih.gov/entrez/query.fcgi?cmd=Retrieve&amp;db=pubmed&amp;dopt=Abstract&amp;list_uids=23296673">http://www.ncbi.nlm.nih.gov/entrez/query.fcgi?cmd=Retrieve&amp;db=pubmed&amp;dopt=Abstract&amp;list_uids=23296673</a>  6 Methods Mol Biol 965   2013 Journal Article,Research Support, Non-U.S. Gov't                                                                                                                                                                                                                                                                                                                              |
| frap1   | asprv1 | <a href="http://www.ncbi.nlm.nih.gov/entrez/query.fcgi?cmd=Retrieve&amp;db=pubmed&amp;dopt=Abstract&amp;list_uids=23296673">http://www.ncbi.nlm.nih.gov/entrez/query.fcgi?cmd=Retrieve&amp;db=pubmed&amp;dopt=Abstract&amp;list_uids=23296673</a>  6 Methods Mol Biol 965   2013 Journal Article,Research Support, Non-U.S. Gov't                                                                                                                                                                                                                                                                                                                              |
| gal     | tp53   | <a href="http://www.ncbi.nlm.nih.gov/entrez/query.fcgi?cmd=Retrieve&amp;db=pubmed&amp;dopt=Abstract&amp;list_uids=23296673">http://www.ncbi.nlm.nih.gov/entrez/query.fcgi?cmd=Retrieve&amp;db=pubmed&amp;dopt=Abstract&amp;list_uids=23296673</a>  6 Methods Mol Biol 965   2013 Journal Article,Research Support, Non-U.S. Gov't                                                                                                                                                                                                                                                                                                                              |

|        |        |                                                                                                                                                                                                                                                                                                                                      |
|--------|--------|--------------------------------------------------------------------------------------------------------------------------------------------------------------------------------------------------------------------------------------------------------------------------------------------------------------------------------------|
| gal    | cdkn1a | <a href="http://www.ncbi.nlm.nih.gov/entrez/query.fcgi?cmd=Retrieve&amp;db=pubmed&amp;dopt=Abstract&amp;list_uids=23296673">http://www.ncbi.nlm.nih.gov/entrez/query.fcgi?cmd=Retrieve&amp;db=pubmed&amp;dopt=Abstract&amp;list_uids=23296673</a>  6 Methods Mol Biol 965   2013 Journal Article,Research Support, Non-U.S. Gov't    |
| gal    | cdkn2a | <a href="http://www.ncbi.nlm.nih.gov/entrez/query.fcgi?cmd=Retrieve&amp;db=pubmed&amp;dopt=Abstract&amp;list_uids=23296673">http://www.ncbi.nlm.nih.gov/entrez/query.fcgi?cmd=Retrieve&amp;db=pubmed&amp;dopt=Abstract&amp;list_uids=23296673</a>  6 Methods Mol Biol 965   2013 Journal Article,Research Support, Non-U.S. Gov't    |
| gal    | asprv1 | <a href="http://www.ncbi.nlm.nih.gov/entrez/query.fcgi?cmd=Retrieve&amp;db=pubmed&amp;dopt=Abstract&amp;list_uids=23296673">http://www.ncbi.nlm.nih.gov/entrez/query.fcgi?cmd=Retrieve&amp;db=pubmed&amp;dopt=Abstract&amp;list_uids=23296673</a>  6 Methods Mol Biol 965   2013 Journal Article,Research Support, Non-U.S. Gov't    |
| tp53   | cdkn1a | <a href="http://www.ncbi.nlm.nih.gov/entrez/query.fcgi?cmd=Retrieve&amp;db=pubmed&amp;dopt=Abstract&amp;list_uids=23296673">http://www.ncbi.nlm.nih.gov/entrez/query.fcgi?cmd=Retrieve&amp;db=pubmed&amp;dopt=Abstract&amp;list_uids=23296673</a>  6 Methods Mol Biol 965   2013 Journal Article,Research Support, Non-U.S. Gov't    |
| tp53   | cdkn2a | <a href="http://www.ncbi.nlm.nih.gov/entrez/query.fcgi?cmd=Retrieve&amp;db=pubmed&amp;dopt=Abstract&amp;list_uids=23296673">http://www.ncbi.nlm.nih.gov/entrez/query.fcgi?cmd=Retrieve&amp;db=pubmed&amp;dopt=Abstract&amp;list_uids=23296673</a>  6 Methods Mol Biol 965   2013 Journal Article,Research Support, Non-U.S. Gov't    |
| tp53   | asprv1 | <a href="http://www.ncbi.nlm.nih.gov/entrez/query.fcgi?cmd=Retrieve&amp;db=pubmed&amp;dopt=Abstract&amp;list_uids=23296673">http://www.ncbi.nlm.nih.gov/entrez/query.fcgi?cmd=Retrieve&amp;db=pubmed&amp;dopt=Abstract&amp;list_uids=23296673</a>  6 Methods Mol Biol 965   2013 Journal Article,Research Support, Non-U.S. Gov't    |
| cdkn1a | cdkn2a | <a href="http://www.ncbi.nlm.nih.gov/entrez/query.fcgi?cmd=Retrieve&amp;db=pubmed&amp;dopt=Abstract&amp;list_uids=23296673">http://www.ncbi.nlm.nih.gov/entrez/query.fcgi?cmd=Retrieve&amp;db=pubmed&amp;dopt=Abstract&amp;list_uids=23296673</a>  6 Methods Mol Biol 965   2013 Journal Article,Research Support, Non-U.S. Gov't    |
| cdkn1a | asprv1 | <a href="http://www.ncbi.nlm.nih.gov/entrez/query.fcgi?cmd=Retrieve&amp;db=pubmed&amp;dopt=Abstract&amp;list_uids=23296673">http://www.ncbi.nlm.nih.gov/entrez/query.fcgi?cmd=Retrieve&amp;db=pubmed&amp;dopt=Abstract&amp;list_uids=23296673</a>  6 Methods Mol Biol 965   2013 Journal Article,Research Support, Non-U.S. Gov't    |
| cdkn2a | asprv1 | <a href="http://www.ncbi.nlm.nih.gov/entrez/query.fcgi?cmd=Retrieve&amp;db=pubmed&amp;dopt=Abstract&amp;list_uids=23296673">http://www.ncbi.nlm.nih.gov/entrez/query.fcgi?cmd=Retrieve&amp;db=pubmed&amp;dopt=Abstract&amp;list_uids=23296673</a>  6 Methods Mol Biol 965   2013 Journal Article,Research Support, Non-U.S. Gov't    |
| cdkn2a | arap2  | <a href="http://www.ncbi.nlm.nih.gov/entrez/query.fcgi?cmd=Retrieve&amp;db=pubmed&amp;dopt=Abstract&amp;list_uids=23295182">http://www.ncbi.nlm.nih.gov/entrez/query.fcgi?cmd=Retrieve&amp;db=pubmed&amp;dopt=Abstract&amp;list_uids=23295182</a>  6 J Biol Chem 288 8 Feb 2013 Journal Article,Research Support, N.I.H., Intramural |
| cdkn2a | arf6   | <a href="http://www.ncbi.nlm.nih.gov/entrez/query.fcgi?cmd=Retrieve&amp;db=pubmed&amp;dopt=Abstract&amp;list_uids=23295182">http://www.ncbi.nlm.nih.gov/entrez/query.fcgi?cmd=Retrieve&amp;db=pubmed&amp;dopt=Abstract&amp;list_uids=23295182</a>  6 J Biol Chem 288 8 Feb 2013 Journal Article,Research Support, N.I.H., Intramural |
| cdkn2a | rasa1  | <a href="http://www.ncbi.nlm.nih.gov/entrez/query.fcgi?cmd=Retrieve&amp;db=pubmed&amp;dopt=Abstract&amp;list_uids=23295182">http://www.ncbi.nlm.nih.gov/entrez/query.fcgi?cmd=Retrieve&amp;db=pubmed&amp;dopt=Abstract&amp;list_uids=23295182</a>  6 J Biol Chem 288 8 Feb 2013 Journal Article,Research Support, N.I.H., Intramural |
| cdkn2a | fas    | <a href="http://www.ncbi.nlm.nih.gov/entrez/query.fcgi?cmd=Retrieve&amp;db=pubmed&amp;dopt=Abstract&amp;list_uids=23295182">http://www.ncbi.nlm.nih.gov/entrez/query.fcgi?cmd=Retrieve&amp;db=pubmed&amp;dopt=Abstract&amp;list_uids=23295182</a>  6 J Biol Chem 288 8 Feb 2013 Journal Article,Research Support, N.I.H., Intramural |
| arf6   | fas    | <a href="http://www.ncbi.nlm.nih.gov/entrez/query.fcgi?cmd=Retrieve&amp;db=pubmed&amp;dopt=Abstract&amp;list_uids=23295182">http://www.ncbi.nlm.nih.gov/entrez/query.fcgi?cmd=Retrieve&amp;db=pubmed&amp;dopt=Abstract&amp;list_uids=23295182</a>  6 J Biol Chem 288 8 Feb 2013 Journal Article,Research Support, N.I.H., Intramural |
| rasa1  | fas    | <a href="http://www.ncbi.nlm.nih.gov/entrez/query.fcgi?cmd=Retrieve&amp;db=pubmed&amp;dopt=Abstract&amp;list_uids=23295182">http://www.ncbi.nlm.nih.gov/entrez/query.fcgi?cmd=Retrieve&amp;db=pubmed&amp;dopt=Abstract&amp;list_uids=23295182</a>  6 J Biol Chem 288 8 Feb 2013 Journal Article,Research Support, N.I.H., Intramural |
| arap2  | mtg1   | <a href="http://www.ncbi.nlm.nih.gov/entrez/query.fcgi?cmd=Retrieve&amp;db=pubmed&amp;dopt=Abstract&amp;list_uids=23295182">http://www.ncbi.nlm.nih.gov/entrez/query.fcgi?cmd=Retrieve&amp;db=pubmed&amp;dopt=Abstract&amp;list_uids=23295182</a>  6 J Biol Chem 288 8 Feb 2013 Journal Article,Research Support, N.I.H., Intramural |
| arap2  | rac1   | <a href="http://www.ncbi.nlm.nih.gov/entrez/query.fcgi?cmd=Retrieve&amp;db=pubmed&amp;dopt=Abstract&amp;list_uids=23295182">http://www.ncbi.nlm.nih.gov/entrez/query.fcgi?cmd=Retrieve&amp;db=pubmed&amp;dopt=Abstract&amp;list_uids=23295182</a>  6 J Biol Chem 288 8 Feb 2013 Journal Article,Research Support, N.I.H., Intramural |
| fas    | mtg1   | <a href="http://www.ncbi.nlm.nih.gov/entrez/query.fcgi?cmd=Retrieve&amp;db=pubmed&amp;dopt=Abstract&amp;list_uids=23295182">http://www.ncbi.nlm.nih.gov/entrez/query.fcgi?cmd=Retrieve&amp;db=pubmed&amp;dopt=Abstract&amp;list_uids=23295182</a>  6 J Biol Chem 288 8 Feb 2013 Journal Article,Research Support, N.I.H., Intramural |

|        |       |                                                                                                                                                                                                                                                                                                                                                                                                                                                                                                                                                                                                                                                                          |
|--------|-------|--------------------------------------------------------------------------------------------------------------------------------------------------------------------------------------------------------------------------------------------------------------------------------------------------------------------------------------------------------------------------------------------------------------------------------------------------------------------------------------------------------------------------------------------------------------------------------------------------------------------------------------------------------------------------|
| mtg1   | rac1  | <a href="http://www.ncbi.nlm.nih.gov/entrez/query.fcgi?cmd=Retrieve&amp;db=pubmed&amp;dopt=Abstract&amp;list_uids=23295182">http://www.ncbi.nlm.nih.gov/entrez/query.fcgi?cmd=Retrieve&amp;db=pubmed&amp;dopt=Abstract&amp;list_uids=23295182</a>  6 J Biol Chem 288 8 Feb 2013 Journal Article,Research Support, N.I.H., Intramural  <a href="http://www.ncbi.nlm.nih.gov/entrez/query.fcgi?cmd=Retrieve&amp;db=pubmed&amp;dopt=Abstract&amp;list_uids=22721990">http://www.ncbi.nlm.nih.gov/entrez/query.fcgi?cmd=Retrieve&amp;db=pubmed&amp;dopt=Abstract&amp;list_uids=22721990</a>  6 Cardiovasc Res 95 3 Aug 2012 Journal Article,Research Support, Non-U.S. Gov't |
| arf6   | rac1  | <a href="http://www.ncbi.nlm.nih.gov/entrez/query.fcgi?cmd=Retrieve&amp;db=pubmed&amp;dopt=Abstract&amp;list_uids=23295182">http://www.ncbi.nlm.nih.gov/entrez/query.fcgi?cmd=Retrieve&amp;db=pubmed&amp;dopt=Abstract&amp;list_uids=23295182</a>  6 J Biol Chem 288 8 Feb 2013 Journal Article,Research Support, N.I.H., Intramural                                                                                                                                                                                                                                                                                                                                     |
| vegfa  | nrp1  | <a href="http://www.ncbi.nlm.nih.gov/entrez/query.fcgi?cmd=Retrieve&amp;db=pubmed&amp;dopt=Abstract&amp;list_uids=23288161">http://www.ncbi.nlm.nih.gov/entrez/query.fcgi?cmd=Retrieve&amp;db=pubmed&amp;dopt=Abstract&amp;list_uids=23288161</a>  6 Arterioscler Thromb Vasc Biol 33 3 Mar 2013 Journal Article,Research Support, Non-U.S. Gov't                                                                                                                                                                                                                                                                                                                        |
| actin  | nrp1  | <a href="http://www.ncbi.nlm.nih.gov/entrez/query.fcgi?cmd=Retrieve&amp;db=pubmed&amp;dopt=Abstract&amp;list_uids=23288161">http://www.ncbi.nlm.nih.gov/entrez/query.fcgi?cmd=Retrieve&amp;db=pubmed&amp;dopt=Abstract&amp;list_uids=23288161</a>  6 Arterioscler Thromb Vasc Biol 33 3 Mar 2013 Journal Article,Research Support, Non-U.S. Gov't                                                                                                                                                                                                                                                                                                                        |
| gdf15  | ctgf  | <a href="http://www.ncbi.nlm.nih.gov/entrez/query.fcgi?cmd=Retrieve&amp;db=pubmed&amp;dopt=Abstract&amp;list_uids=23280549">http://www.ncbi.nlm.nih.gov/entrez/query.fcgi?cmd=Retrieve&amp;db=pubmed&amp;dopt=Abstract&amp;list_uids=23280549</a>  6 J Cell Biochem 114 6 Jun 2013 Journal Article,Research Support, Non-U.S. Gov't                                                                                                                                                                                                                                                                                                                                      |
| gdf15  | ptk2  | <a href="http://www.ncbi.nlm.nih.gov/entrez/query.fcgi?cmd=Retrieve&amp;db=pubmed&amp;dopt=Abstract&amp;list_uids=23280549">http://www.ncbi.nlm.nih.gov/entrez/query.fcgi?cmd=Retrieve&amp;db=pubmed&amp;dopt=Abstract&amp;list_uids=23280549</a>  6 J Cell Biochem 114 6 Jun 2013 Journal Article,Research Support, Non-U.S. Gov't                                                                                                                                                                                                                                                                                                                                      |
| wasf1  | wasl  | <a href="http://www.ncbi.nlm.nih.gov/entrez/query.fcgi?cmd=Retrieve&amp;db=pubmed&amp;dopt=Abstract&amp;list_uids=23273897">http://www.ncbi.nlm.nih.gov/entrez/query.fcgi?cmd=Retrieve&amp;db=pubmed&amp;dopt=Abstract&amp;list_uids=23273897</a>  6 Curr Biol 23 2 Jan 2013 Journal Article,Research Support, Non-U.S. Gov't                                                                                                                                                                                                                                                                                                                                            |
| wasf1  | ptk2  | <a href="http://www.ncbi.nlm.nih.gov/entrez/query.fcgi?cmd=Retrieve&amp;db=pubmed&amp;dopt=Abstract&amp;list_uids=23273897">http://www.ncbi.nlm.nih.gov/entrez/query.fcgi?cmd=Retrieve&amp;db=pubmed&amp;dopt=Abstract&amp;list_uids=23273897</a>  6 Curr Biol 23 2 Jan 2013 Journal Article,Research Support, Non-U.S. Gov't                                                                                                                                                                                                                                                                                                                                            |
| wasl   | ptk2  | <a href="http://www.ncbi.nlm.nih.gov/entrez/query.fcgi?cmd=Retrieve&amp;db=pubmed&amp;dopt=Abstract&amp;list_uids=23273897">http://www.ncbi.nlm.nih.gov/entrez/query.fcgi?cmd=Retrieve&amp;db=pubmed&amp;dopt=Abstract&amp;list_uids=23273897</a>  6 Curr Biol 23 2 Jan 2013 Journal Article,Research Support, Non-U.S. Gov't                                                                                                                                                                                                                                                                                                                                            |
| wasf1  | actr2 | <a href="http://www.ncbi.nlm.nih.gov/entrez/query.fcgi?cmd=Retrieve&amp;db=pubmed&amp;dopt=Abstract&amp;list_uids=23273897">http://www.ncbi.nlm.nih.gov/entrez/query.fcgi?cmd=Retrieve&amp;db=pubmed&amp;dopt=Abstract&amp;list_uids=23273897</a>  6 Curr Biol 23 2 Jan 2013 Journal Article,Research Support, Non-U.S. Gov't                                                                                                                                                                                                                                                                                                                                            |
| ptk2   | actr2 | <a href="http://www.ncbi.nlm.nih.gov/entrez/query.fcgi?cmd=Retrieve&amp;db=pubmed&amp;dopt=Abstract&amp;list_uids=23273897">http://www.ncbi.nlm.nih.gov/entrez/query.fcgi?cmd=Retrieve&amp;db=pubmed&amp;dopt=Abstract&amp;list_uids=23273897</a>  6 Curr Biol 23 2 Jan 2013 Journal Article,Research Support, Non-U.S. Gov't                                                                                                                                                                                                                                                                                                                                            |
| actr2  | actin | <a href="http://www.ncbi.nlm.nih.gov/entrez/query.fcgi?cmd=Retrieve&amp;db=pubmed&amp;dopt=Abstract&amp;list_uids=23273897">http://www.ncbi.nlm.nih.gov/entrez/query.fcgi?cmd=Retrieve&amp;db=pubmed&amp;dopt=Abstract&amp;list_uids=23273897</a>  6 Curr Biol 23 2 Jan 2013 Journal Article,Research Support, Non-U.S. Gov't                                                                                                                                                                                                                                                                                                                                            |
| col2a1 | bmp2  | <a href="http://www.ncbi.nlm.nih.gov/entrez/query.fcgi?cmd=Retrieve&amp;db=pubmed&amp;dopt=Abstract&amp;list_uids=23270543">http://www.ncbi.nlm.nih.gov/entrez/query.fcgi?cmd=Retrieve&amp;db=pubmed&amp;dopt=Abstract&amp;list_uids=23270543</a>  6 Tissue Eng Part C Methods 19 7 Jul 2013 Journal Article,Research Support, Non-U.S. Gov't                                                                                                                                                                                                                                                                                                                            |
| col2a1 | sox9  | <a href="http://www.ncbi.nlm.nih.gov/entrez/query.fcgi?cmd=Retrieve&amp;db=pubmed&amp;dopt=Abstract&amp;list_uids=23270543">http://www.ncbi.nlm.nih.gov/entrez/query.fcgi?cmd=Retrieve&amp;db=pubmed&amp;dopt=Abstract&amp;list_uids=23270543</a>  6 Tissue Eng Part C Methods 19 7 Jul 2013 Journal Article,Research Support, Non-U.S. Gov't                                                                                                                                                                                                                                                                                                                            |
| col2a1 | sox5  | <a href="http://www.ncbi.nlm.nih.gov/entrez/query.fcgi?cmd=Retrieve&amp;db=pubmed&amp;dopt=Abstract&amp;list_uids=23270543">http://www.ncbi.nlm.nih.gov/entrez/query.fcgi?cmd=Retrieve&amp;db=pubmed&amp;dopt=Abstract&amp;list_uids=23270543</a>  6 Tissue Eng Part C Methods 19 7 Jul 2013 Journal Article,Research Support, Non-U.S. Gov't                                                                                                                                                                                                                                                                                                                            |
| col2a1 | sox6  | <a href="http://www.ncbi.nlm.nih.gov/entrez/query.fcgi?cmd=Retrieve&amp;db=pubmed&amp;dopt=Abstract&amp;list_uids=23270543">http://www.ncbi.nlm.nih.gov/entrez/query.fcgi?cmd=Retrieve&amp;db=pubmed&amp;dopt=Abstract&amp;list_uids=23270543</a>  6 Tissue Eng Part C Methods 19 7 Jul 2013 Journal Article,Research Support, Non-U.S. Gov't                                                                                                                                                                                                                                                                                                                            |
| col2a1 | sp1   | <a href="http://www.ncbi.nlm.nih.gov/entrez/query.fcgi?cmd=Retrieve&amp;db=pubmed&amp;dopt=Abstract&amp;list_uids=23270543">http://www.ncbi.nlm.nih.gov/entrez/query.fcgi?cmd=Retrieve&amp;db=pubmed&amp;dopt=Abstract&amp;list_uids=23270543</a>  6 Tissue Eng Part C Methods 19 7 Jul 2013 Journal Article,Research Support, Non-U.S. Gov't                                                                                                                                                                                                                                                                                                                            |

[illegible]

|        |           |                                                                                                                                                                                                                                                                                                                                               |
|--------|-----------|-----------------------------------------------------------------------------------------------------------------------------------------------------------------------------------------------------------------------------------------------------------------------------------------------------------------------------------------------|
| sox5   | zbtb7b    | <a href="http://www.ncbi.nlm.nih.gov/entrez/query.fcgi?cmd=Retrieve&amp;db=pubmed&amp;dopt=Abstract&amp;list_uids=23270543">http://www.ncbi.nlm.nih.gov/entrez/query.fcgi?cmd=Retrieve&amp;db=pubmed&amp;dopt=Abstract&amp;list_uids=23270543</a>  6 Tissue Eng Part C Methods 19 7 Jul 2013 Journal Article,Research Support, Non-U.S. Gov't |
| sox5   | rela      | <a href="http://www.ncbi.nlm.nih.gov/entrez/query.fcgi?cmd=Retrieve&amp;db=pubmed&amp;dopt=Abstract&amp;list_uids=23270543">http://www.ncbi.nlm.nih.gov/entrez/query.fcgi?cmd=Retrieve&amp;db=pubmed&amp;dopt=Abstract&amp;list_uids=23270543</a>  6 Tissue Eng Part C Methods 19 7 Jul 2013 Journal Article,Research Support, Non-U.S. Gov't |
| sox5   | nf-kappab | <a href="http://www.ncbi.nlm.nih.gov/entrez/query.fcgi?cmd=Retrieve&amp;db=pubmed&amp;dopt=Abstract&amp;list_uids=23270543">http://www.ncbi.nlm.nih.gov/entrez/query.fcgi?cmd=Retrieve&amp;db=pubmed&amp;dopt=Abstract&amp;list_uids=23270543</a>  6 Tissue Eng Part C Methods 19 7 Jul 2013 Journal Article,Research Support, Non-U.S. Gov't |
| sox6   | sp1       | <a href="http://www.ncbi.nlm.nih.gov/entrez/query.fcgi?cmd=Retrieve&amp;db=pubmed&amp;dopt=Abstract&amp;list_uids=23270543">http://www.ncbi.nlm.nih.gov/entrez/query.fcgi?cmd=Retrieve&amp;db=pubmed&amp;dopt=Abstract&amp;list_uids=23270543</a>  6 Tissue Eng Part C Methods 19 7 Jul 2013 Journal Article,Research Support, Non-U.S. Gov't |
| sox6   | zbtb7b    | <a href="http://www.ncbi.nlm.nih.gov/entrez/query.fcgi?cmd=Retrieve&amp;db=pubmed&amp;dopt=Abstract&amp;list_uids=23270543">http://www.ncbi.nlm.nih.gov/entrez/query.fcgi?cmd=Retrieve&amp;db=pubmed&amp;dopt=Abstract&amp;list_uids=23270543</a>  6 Tissue Eng Part C Methods 19 7 Jul 2013 Journal Article,Research Support, Non-U.S. Gov't |
| sox6   | rela      | <a href="http://www.ncbi.nlm.nih.gov/entrez/query.fcgi?cmd=Retrieve&amp;db=pubmed&amp;dopt=Abstract&amp;list_uids=23270543">http://www.ncbi.nlm.nih.gov/entrez/query.fcgi?cmd=Retrieve&amp;db=pubmed&amp;dopt=Abstract&amp;list_uids=23270543</a>  6 Tissue Eng Part C Methods 19 7 Jul 2013 Journal Article,Research Support, Non-U.S. Gov't |
| sox6   | nf-kappab | <a href="http://www.ncbi.nlm.nih.gov/entrez/query.fcgi?cmd=Retrieve&amp;db=pubmed&amp;dopt=Abstract&amp;list_uids=23270543">http://www.ncbi.nlm.nih.gov/entrez/query.fcgi?cmd=Retrieve&amp;db=pubmed&amp;dopt=Abstract&amp;list_uids=23270543</a>  6 Tissue Eng Part C Methods 19 7 Jul 2013 Journal Article,Research Support, Non-U.S. Gov't |
| sp1    | zbtb7b    | <a href="http://www.ncbi.nlm.nih.gov/entrez/query.fcgi?cmd=Retrieve&amp;db=pubmed&amp;dopt=Abstract&amp;list_uids=23270543">http://www.ncbi.nlm.nih.gov/entrez/query.fcgi?cmd=Retrieve&amp;db=pubmed&amp;dopt=Abstract&amp;list_uids=23270543</a>  6 Tissue Eng Part C Methods 19 7 Jul 2013 Journal Article,Research Support, Non-U.S. Gov't |
| sp1    | rela      | <a href="http://www.ncbi.nlm.nih.gov/entrez/query.fcgi?cmd=Retrieve&amp;db=pubmed&amp;dopt=Abstract&amp;list_uids=23270543">http://www.ncbi.nlm.nih.gov/entrez/query.fcgi?cmd=Retrieve&amp;db=pubmed&amp;dopt=Abstract&amp;list_uids=23270543</a>  6 Tissue Eng Part C Methods 19 7 Jul 2013 Journal Article,Research Support, Non-U.S. Gov't |
| sp1    | nf-kappab | <a href="http://www.ncbi.nlm.nih.gov/entrez/query.fcgi?cmd=Retrieve&amp;db=pubmed&amp;dopt=Abstract&amp;list_uids=23270543">http://www.ncbi.nlm.nih.gov/entrez/query.fcgi?cmd=Retrieve&amp;db=pubmed&amp;dopt=Abstract&amp;list_uids=23270543</a>  6 Tissue Eng Part C Methods 19 7 Jul 2013 Journal Article,Research Support, Non-U.S. Gov't |
| zbtb7b | rela      | <a href="http://www.ncbi.nlm.nih.gov/entrez/query.fcgi?cmd=Retrieve&amp;db=pubmed&amp;dopt=Abstract&amp;list_uids=23270543">http://www.ncbi.nlm.nih.gov/entrez/query.fcgi?cmd=Retrieve&amp;db=pubmed&amp;dopt=Abstract&amp;list_uids=23270543</a>  6 Tissue Eng Part C Methods 19 7 Jul 2013 Journal Article,Research Support, Non-U.S. Gov't |
| zbtb7b | nf-kappab | <a href="http://www.ncbi.nlm.nih.gov/entrez/query.fcgi?cmd=Retrieve&amp;db=pubmed&amp;dopt=Abstract&amp;list_uids=23270543">http://www.ncbi.nlm.nih.gov/entrez/query.fcgi?cmd=Retrieve&amp;db=pubmed&amp;dopt=Abstract&amp;list_uids=23270543</a>  6 Tissue Eng Part C Methods 19 7 Jul 2013 Journal Article,Research Support, Non-U.S. Gov't |
| rela   | nf-kappab | <a href="http://www.ncbi.nlm.nih.gov/entrez/query.fcgi?cmd=Retrieve&amp;db=pubmed&amp;dopt=Abstract&amp;list_uids=23270543">http://www.ncbi.nlm.nih.gov/entrez/query.fcgi?cmd=Retrieve&amp;db=pubmed&amp;dopt=Abstract&amp;list_uids=23270543</a>  6 Tissue Eng Part C Methods 19 7 Jul 2013 Journal Article,Research Support, Non-U.S. Gov't |
| myh14  | kif1c     | <a href="http://www.ncbi.nlm.nih.gov/entrez/query.fcgi?cmd=Retrieve&amp;db=pubmed&amp;dopt=Abstract&amp;list_uids=23237952">http://www.ncbi.nlm.nih.gov/entrez/query.fcgi?cmd=Retrieve&amp;db=pubmed&amp;dopt=Abstract&amp;list_uids=23237952</a>  6 Dev Cell 23 6 Dec 2012 Journal Article,Research Support, Non-U.S. Gov't                  |
| kat5   | gtse1     | <a href="http://www.ncbi.nlm.nih.gov/entrez/query.fcgi?cmd=Retrieve&amp;db=pubmed&amp;dopt=Abstract&amp;list_uids=23236459">http://www.ncbi.nlm.nih.gov/entrez/query.fcgi?cmd=Retrieve&amp;db=pubmed&amp;dopt=Abstract&amp;list_uids=23236459</a>  6 PLoS One 7 12  2012 Journal Article,Research Support, Non-U.S. Gov't                     |
| epor   | jak2      | <a href="http://www.ncbi.nlm.nih.gov/entrez/query.fcgi?cmd=Retrieve&amp;db=pubmed&amp;dopt=Abstract&amp;list_uids=23221524">http://www.ncbi.nlm.nih.gov/entrez/query.fcgi?cmd=Retrieve&amp;db=pubmed&amp;dopt=Abstract&amp;list_uids=23221524</a>  6 J Microbiol Biotechnol 22 12 Dec 2012 Journal Article,Research Support, Non-U.S. Gov't   |
| epor   | stat5a    | <a href="http://www.ncbi.nlm.nih.gov/entrez/query.fcgi?cmd=Retrieve&amp;db=pubmed&amp;dopt=Abstract&amp;list_uids=23221524">http://www.ncbi.nlm.nih.gov/entrez/query.fcgi?cmd=Retrieve&amp;db=pubmed&amp;dopt=Abstract&amp;list_uids=23221524</a>  6 J Microbiol Biotechnol 22 12 Dec 2012 Journal Article,Research Support, Non-U.S. Gov't   |
| jak2   | stat5a    | <a href="http://www.ncbi.nlm.nih.gov/entrez/query.fcgi?cmd=Retrieve&amp;db=pubmed&amp;dopt=Abstract&amp;list_uids=23221524">http://www.ncbi.nlm.nih.gov/entrez/query.fcgi?cmd=Retrieve&amp;db=pubmed&amp;dopt=Abstract&amp;list_uids=23221524</a>  6 J Microbiol Biotechnol 22 12 Dec 2012 Journal Article,Research Support, Non-U.S. Gov't   |

|         |         |                                                                                                                                                                                                                                                                                                                                                                                                                                                                                                                                                                                                                                                                                                         |
|---------|---------|---------------------------------------------------------------------------------------------------------------------------------------------------------------------------------------------------------------------------------------------------------------------------------------------------------------------------------------------------------------------------------------------------------------------------------------------------------------------------------------------------------------------------------------------------------------------------------------------------------------------------------------------------------------------------------------------------------|
| stim1   | hcc     | <a href="http://www.ncbi.nlm.nih.gov/entrez/query.fcgi?cmd=Retrieve&amp;db=pubmed&amp;dopt=Abstract&amp;list_uids=23211538">http://www.ncbi.nlm.nih.gov/entrez/query.fcgi?cmd=Retrieve&amp;db=pubmed&amp;dopt=Abstract&amp;list_uids=23211538</a>  6 Cancer Lett 330 2 Apr 2013 Journal Article,Research Support, Non-U.S. Gov't                                                                                                                                                                                                                                                                                                                                                                        |
| rap1a   | rapgef3 | <a href="http://www.ncbi.nlm.nih.gov/entrez/query.fcgi?cmd=Retrieve&amp;db=pubmed&amp;dopt=Abstract&amp;list_uids=23209645">http://www.ncbi.nlm.nih.gov/entrez/query.fcgi?cmd=Retrieve&amp;db=pubmed&amp;dopt=Abstract&amp;list_uids=23209645</a>  6 PLoS One 7 11  2012 Journal Article,Research Support, Non-U.S. Gov't                                                                                                                                                                                                                                                                                                                                                                               |
| src     | rap1a   | <a href="http://www.ncbi.nlm.nih.gov/entrez/query.fcgi?cmd=Retrieve&amp;db=pubmed&amp;dopt=Abstract&amp;list_uids=22499769">http://www.ncbi.nlm.nih.gov/entrez/query.fcgi?cmd=Retrieve&amp;db=pubmed&amp;dopt=Abstract&amp;list_uids=22499769</a>  6 Mol Cell Proteomics 11 8 Aug 2012 Journal Article,Research Support, N.I.H., Extramural,Research Support, Non-U.S. Gov't  <a href="http://www.ncbi.nlm.nih.gov/entrez/query.fcgi?cmd=Retrieve&amp;db=pubmed&amp;dopt=Abstract&amp;list_uids=23209645">http://www.ncbi.nlm.nih.gov/entrez/query.fcgi?cmd=Retrieve&amp;db=pubmed&amp;dopt=Abstract&amp;list_uids=23209645</a>  6 PLoS One 7 11  2012 Journal Article,Research Support, Non-U.S. Gov't |
| ptk2    | rap1a   | <a href="http://www.ncbi.nlm.nih.gov/entrez/query.fcgi?cmd=Retrieve&amp;db=pubmed&amp;dopt=Abstract&amp;list_uids=23209645">http://www.ncbi.nlm.nih.gov/entrez/query.fcgi?cmd=Retrieve&amp;db=pubmed&amp;dopt=Abstract&amp;list_uids=23209645</a>  6 PLoS One 7 11  2012 Journal Article,Research Support, Non-U.S. Gov't                                                                                                                                                                                                                                                                                                                                                                               |
| ptk2    | 3.6.4.1 | <a href="http://www.ncbi.nlm.nih.gov/entrez/query.fcgi?cmd=Retrieve&amp;db=pubmed&amp;dopt=Abstract&amp;list_uids=23209645">http://www.ncbi.nlm.nih.gov/entrez/query.fcgi?cmd=Retrieve&amp;db=pubmed&amp;dopt=Abstract&amp;list_uids=23209645</a>  6 PLoS One 7 11  2012 Journal Article,Research Support, Non-U.S. Gov't                                                                                                                                                                                                                                                                                                                                                                               |
| rap1a   | 3.6.4.1 | <a href="http://www.ncbi.nlm.nih.gov/entrez/query.fcgi?cmd=Retrieve&amp;db=pubmed&amp;dopt=Abstract&amp;list_uids=23209645">http://www.ncbi.nlm.nih.gov/entrez/query.fcgi?cmd=Retrieve&amp;db=pubmed&amp;dopt=Abstract&amp;list_uids=23209645</a>  6 PLoS One 7 11  2012 Journal Article,Research Support, Non-U.S. Gov't                                                                                                                                                                                                                                                                                                                                                                               |
| ctsh    | pc-3    | <a href="http://www.ncbi.nlm.nih.gov/entrez/query.fcgi?cmd=Retrieve&amp;db=pubmed&amp;dopt=Abstract&amp;list_uids=23204516">http://www.ncbi.nlm.nih.gov/entrez/query.fcgi?cmd=Retrieve&amp;db=pubmed&amp;dopt=Abstract&amp;list_uids=23204516</a>  6 J Biol Chem 288 4 Jan 2013 Journal Article,Research Support, Non-U.S. Gov't                                                                                                                                                                                                                                                                                                                                                                        |
| gnrh1   | gnrhr   | <a href="http://www.ncbi.nlm.nih.gov/entrez/query.fcgi?cmd=Retrieve&amp;db=pubmed&amp;dopt=Abstract&amp;list_uids=23176180">http://www.ncbi.nlm.nih.gov/entrez/query.fcgi?cmd=Retrieve&amp;db=pubmed&amp;dopt=Abstract&amp;list_uids=23176180</a>  6 BMC Cancer 12   2012 Journal Article,Research Support, Non-U.S. Gov't                                                                                                                                                                                                                                                                                                                                                                              |
| actin   | gnrh1   | <a href="http://www.ncbi.nlm.nih.gov/entrez/query.fcgi?cmd=Retrieve&amp;db=pubmed&amp;dopt=Abstract&amp;list_uids=23176180">http://www.ncbi.nlm.nih.gov/entrez/query.fcgi?cmd=Retrieve&amp;db=pubmed&amp;dopt=Abstract&amp;list_uids=23176180</a>  6 BMC Cancer 12   2012 Journal Article,Research Support, Non-U.S. Gov't                                                                                                                                                                                                                                                                                                                                                                              |
| gnrh1   | rhoa    | <a href="http://www.ncbi.nlm.nih.gov/entrez/query.fcgi?cmd=Retrieve&amp;db=pubmed&amp;dopt=Abstract&amp;list_uids=23176180">http://www.ncbi.nlm.nih.gov/entrez/query.fcgi?cmd=Retrieve&amp;db=pubmed&amp;dopt=Abstract&amp;list_uids=23176180</a>  6 BMC Cancer 12   2012 Journal Article,Research Support, Non-U.S. Gov't                                                                                                                                                                                                                                                                                                                                                                              |
| itgal   | orai1   | <a href="http://www.ncbi.nlm.nih.gov/entrez/query.fcgi?cmd=Retrieve&amp;db=pubmed&amp;dopt=Abstract&amp;list_uids=23144497">http://www.ncbi.nlm.nih.gov/entrez/query.fcgi?cmd=Retrieve&amp;db=pubmed&amp;dopt=Abstract&amp;list_uids=23144497</a>  6 J Immunol 189 12 Dec 2012 Journal Article                                                                                                                                                                                                                                                                                                                                                                                                          |
| il8     | itgal   | <a href="http://www.ncbi.nlm.nih.gov/entrez/query.fcgi?cmd=Retrieve&amp;db=pubmed&amp;dopt=Abstract&amp;list_uids=23144497">http://www.ncbi.nlm.nih.gov/entrez/query.fcgi?cmd=Retrieve&amp;db=pubmed&amp;dopt=Abstract&amp;list_uids=23144497</a>  6 J Immunol 189 12 Dec 2012 Journal Article                                                                                                                                                                                                                                                                                                                                                                                                          |
| il8     | icam1   | <a href="http://www.ncbi.nlm.nih.gov/entrez/query.fcgi?cmd=Retrieve&amp;db=pubmed&amp;dopt=Abstract&amp;list_uids=23144497">http://www.ncbi.nlm.nih.gov/entrez/query.fcgi?cmd=Retrieve&amp;db=pubmed&amp;dopt=Abstract&amp;list_uids=23144497</a>  6 J Immunol 189 12 Dec 2012 Journal Article                                                                                                                                                                                                                                                                                                                                                                                                          |
| itgal   | icam1   | <a href="http://www.ncbi.nlm.nih.gov/entrez/query.fcgi?cmd=Retrieve&amp;db=pubmed&amp;dopt=Abstract&amp;list_uids=23144497">http://www.ncbi.nlm.nih.gov/entrez/query.fcgi?cmd=Retrieve&amp;db=pubmed&amp;dopt=Abstract&amp;list_uids=23144497</a>  6 J Immunol 189 12 Dec 2012 Journal Article                                                                                                                                                                                                                                                                                                                                                                                                          |
| myh14   | 3.6.1.8 | <a href="http://www.ncbi.nlm.nih.gov/entrez/query.fcgi?cmd=Retrieve&amp;db=pubmed&amp;dopt=Abstract&amp;list_uids=23132927">http://www.ncbi.nlm.nih.gov/entrez/query.fcgi?cmd=Retrieve&amp;db=pubmed&amp;dopt=Abstract&amp;list_uids=23132927</a>  6 J Cell Sci 126 Pt 1 Jan 2013 Journal Article,Research Support, Non-U.S. Gov't                                                                                                                                                                                                                                                                                                                                                                      |
| slk     | ptk2    | <a href="http://www.ncbi.nlm.nih.gov/entrez/query.fcgi?cmd=Retrieve&amp;db=pubmed&amp;dopt=Abstract&amp;list_uids=23128389">http://www.ncbi.nlm.nih.gov/entrez/query.fcgi?cmd=Retrieve&amp;db=pubmed&amp;dopt=Abstract&amp;list_uids=23128389</a>  6 Oncogene 32 39 Sep 2013 Journal Article,Research Support, Non-U.S. Gov't                                                                                                                                                                                                                                                                                                                                                                           |
| rps6ka3 | zhx2    | <a href="http://www.ncbi.nlm.nih.gov/entrez/query.fcgi?cmd=Retrieve&amp;db=pubmed&amp;dopt=Abstract&amp;list_uids=23118220">http://www.ncbi.nlm.nih.gov/entrez/query.fcgi?cmd=Retrieve&amp;db=pubmed&amp;dopt=Abstract&amp;list_uids=23118220</a>  6 J Biol Chem 287 52 Dec 2012 Journal Article,Research Support, N.I.H., Extramural,Research Support, Non-U.S. Gov't,Research                                                                                                                                                                                                                                                                                                                         |

|        |          |                                                                                                                                                                                                                                                                                                                                                                        |
|--------|----------|------------------------------------------------------------------------------------------------------------------------------------------------------------------------------------------------------------------------------------------------------------------------------------------------------------------------------------------------------------------------|
|        |          | Support, U.S. Gov't, Non-P.H.S.                                                                                                                                                                                                                                                                                                                                        |
| cav1   | src      | <a href="http://www.ncbi.nlm.nih.gov/entrez/query.fcgi?cmd=Retrieve&amp;db=pubmed&amp;dopt=Abstract&amp;list_uids=23091071">http://www.ncbi.nlm.nih.gov/entrez/query.fcgi?cmd=Retrieve&amp;db=pubmed&amp;dopt=Abstract&amp;list_uids=23091071</a>  6 J Cell Biol 199 3 Oct 2012 Journal Article,Research Support, Non-U.S. Gov't                                       |
| cav1   | rbm8a    | <a href="http://www.ncbi.nlm.nih.gov/entrez/query.fcgi?cmd=Retrieve&amp;db=pubmed&amp;dopt=Abstract&amp;list_uids=23091071">http://www.ncbi.nlm.nih.gov/entrez/query.fcgi?cmd=Retrieve&amp;db=pubmed&amp;dopt=Abstract&amp;list_uids=23091071</a>  6 J Cell Biol 199 3 Oct 2012 Journal Article,Research Support, Non-U.S. Gov't                                       |
| src    | rbm8a    | <a href="http://www.ncbi.nlm.nih.gov/entrez/query.fcgi?cmd=Retrieve&amp;db=pubmed&amp;dopt=Abstract&amp;list_uids=23091071">http://www.ncbi.nlm.nih.gov/entrez/query.fcgi?cmd=Retrieve&amp;db=pubmed&amp;dopt=Abstract&amp;list_uids=23091071</a>  6 J Cell Biol 199 3 Oct 2012 Journal Article,Research Support, Non-U.S. Gov't                                       |
| cav1   | actin    | <a href="http://www.ncbi.nlm.nih.gov/entrez/query.fcgi?cmd=Retrieve&amp;db=pubmed&amp;dopt=Abstract&amp;list_uids=23091071">http://www.ncbi.nlm.nih.gov/entrez/query.fcgi?cmd=Retrieve&amp;db=pubmed&amp;dopt=Abstract&amp;list_uids=23091071</a>  6 J Cell Biol 199 3 Oct 2012 Journal Article,Research Support, Non-U.S. Gov't                                       |
| cav1   | egr1     | <a href="http://www.ncbi.nlm.nih.gov/entrez/query.fcgi?cmd=Retrieve&amp;db=pubmed&amp;dopt=Abstract&amp;list_uids=23091071">http://www.ncbi.nlm.nih.gov/entrez/query.fcgi?cmd=Retrieve&amp;db=pubmed&amp;dopt=Abstract&amp;list_uids=23091071</a>  6 J Cell Biol 199 3 Oct 2012 Journal Article,Research Support, Non-U.S. Gov't                                       |
| actin  | egr1     | <a href="http://www.ncbi.nlm.nih.gov/entrez/query.fcgi?cmd=Retrieve&amp;db=pubmed&amp;dopt=Abstract&amp;list_uids=23091071">http://www.ncbi.nlm.nih.gov/entrez/query.fcgi?cmd=Retrieve&amp;db=pubmed&amp;dopt=Abstract&amp;list_uids=23091071</a>  6 J Cell Biol 199 3 Oct 2012 Journal Article,Research Support, Non-U.S. Gov't                                       |
| cav1   | pkc      | <a href="http://www.ncbi.nlm.nih.gov/entrez/query.fcgi?cmd=Retrieve&amp;db=pubmed&amp;dopt=Abstract&amp;list_uids=23091071">http://www.ncbi.nlm.nih.gov/entrez/query.fcgi?cmd=Retrieve&amp;db=pubmed&amp;dopt=Abstract&amp;list_uids=23091071</a>  6 J Cell Biol 199 3 Oct 2012 Journal Article,Research Support, Non-U.S. Gov't                                       |
| egr1   | src      | <a href="http://www.ncbi.nlm.nih.gov/entrez/query.fcgi?cmd=Retrieve&amp;db=pubmed&amp;dopt=Abstract&amp;list_uids=23091071">http://www.ncbi.nlm.nih.gov/entrez/query.fcgi?cmd=Retrieve&amp;db=pubmed&amp;dopt=Abstract&amp;list_uids=23091071</a>  6 J Cell Biol 199 3 Oct 2012 Journal Article,Research Support, Non-U.S. Gov't                                       |
| egr1   | pkc      | <a href="http://www.ncbi.nlm.nih.gov/entrez/query.fcgi?cmd=Retrieve&amp;db=pubmed&amp;dopt=Abstract&amp;list_uids=23091071">http://www.ncbi.nlm.nih.gov/entrez/query.fcgi?cmd=Retrieve&amp;db=pubmed&amp;dopt=Abstract&amp;list_uids=23091071</a>  6 J Cell Biol 199 3 Oct 2012 Journal Article,Research Support, Non-U.S. Gov't                                       |
| actin  | pkc      | <a href="http://www.ncbi.nlm.nih.gov/entrez/query.fcgi?cmd=Retrieve&amp;db=pubmed&amp;dopt=Abstract&amp;list_uids=23091071">http://www.ncbi.nlm.nih.gov/entrez/query.fcgi?cmd=Retrieve&amp;db=pubmed&amp;dopt=Abstract&amp;list_uids=23091071</a>  6 J Cell Biol 199 3 Oct 2012 Journal Article,Research Support, Non-U.S. Gov't                                       |
| src    | pkc      | <a href="http://www.ncbi.nlm.nih.gov/entrez/query.fcgi?cmd=Retrieve&amp;db=pubmed&amp;dopt=Abstract&amp;list_uids=23091071">http://www.ncbi.nlm.nih.gov/entrez/query.fcgi?cmd=Retrieve&amp;db=pubmed&amp;dopt=Abstract&amp;list_uids=23091071</a>  6 J Cell Biol 199 3 Oct 2012 Journal Article,Research Support, Non-U.S. Gov't                                       |
| tfap2a | clathrin | <a href="http://www.ncbi.nlm.nih.gov/entrez/query.fcgi?cmd=Retrieve&amp;db=pubmed&amp;dopt=Abstract&amp;list_uids=23056266">http://www.ncbi.nlm.nih.gov/entrez/query.fcgi?cmd=Retrieve&amp;db=pubmed&amp;dopt=Abstract&amp;list_uids=23056266</a>  6 PLoS One 7 10 2012 Journal Article,Research Support, N.I.H., Extramural                                           |
| fas    | orai1    | <a href="http://www.ncbi.nlm.nih.gov/entrez/query.fcgi?cmd=Retrieve&amp;db=pubmed&amp;dopt=Abstract&amp;list_uids=23043102">http://www.ncbi.nlm.nih.gov/entrez/query.fcgi?cmd=Retrieve&amp;db=pubmed&amp;dopt=Abstract&amp;list_uids=23043102</a>  6 J Biol Chem 287 48 Nov 2012 Journal Article,Research Support, N.I.H., Extramural,Research Support, Non-U.S. Gov't |
| fas    | pla2g6   | <a href="http://www.ncbi.nlm.nih.gov/entrez/query.fcgi?cmd=Retrieve&amp;db=pubmed&amp;dopt=Abstract&amp;list_uids=23043102">http://www.ncbi.nlm.nih.gov/entrez/query.fcgi?cmd=Retrieve&amp;db=pubmed&amp;dopt=Abstract&amp;list_uids=23043102</a>  6 J Biol Chem 287 48 Nov 2012 Journal Article,Research Support, N.I.H., Extramural,Research Support, Non-U.S. Gov't |
| fas    | stim1    | <a href="http://www.ncbi.nlm.nih.gov/entrez/query.fcgi?cmd=Retrieve&amp;db=pubmed&amp;dopt=Abstract&amp;list_uids=23043102">http://www.ncbi.nlm.nih.gov/entrez/query.fcgi?cmd=Retrieve&amp;db=pubmed&amp;dopt=Abstract&amp;list_uids=23043102</a>  6 J Biol Chem 287 48 Nov 2012 Journal Article,Research Support, N.I.H., Extramural,Research Support, Non-U.S. Gov't |
| orai1  | pla2g6   | <a href="http://www.ncbi.nlm.nih.gov/entrez/query.fcgi?cmd=Retrieve&amp;db=pubmed&amp;dopt=Abstract&amp;list_uids=23043102">http://www.ncbi.nlm.nih.gov/entrez/query.fcgi?cmd=Retrieve&amp;db=pubmed&amp;dopt=Abstract&amp;list_uids=23043102</a>  6 J Biol Chem 287 48 Nov 2012 Journal Article,Research Support, N.I.H., Extramural,Research Support, Non-U.S. Gov't |
| orai1  | stim1    | <a href="http://www.ncbi.nlm.nih.gov/entrez/query.fcgi?cmd=Retrieve&amp;db=pubmed&amp;dopt=Abstract&amp;list_uids=23043102">http://www.ncbi.nlm.nih.gov/entrez/query.fcgi?cmd=Retrieve&amp;db=pubmed&amp;dopt=Abstract&amp;list_uids=23043102</a>  6 J Biol Chem 287 48 Nov 2012 Journal Article,Research Support, N.I.H., Extramural,Research Support, Non-U.S. Gov't |

|          |       |                                                                                                                                                                                                                                                                                                                                                                               |
|----------|-------|-------------------------------------------------------------------------------------------------------------------------------------------------------------------------------------------------------------------------------------------------------------------------------------------------------------------------------------------------------------------------------|
| pla2g6   | stim1 | <a href="http://www.ncbi.nlm.nih.gov/entrez/query.fcgi?cmd=Retrieve&amp;db=pubmed&amp;dopt=Abstract&amp;list_uids=23043102">http://www.ncbi.nlm.nih.gov/entrez/query.fcgi?cmd=Retrieve&amp;db=pubmed&amp;dopt=Abstract&amp;list_uids=23043102</a> [6]J Biol Chem[287 48 Nov 2012 Journal Article,Research Support, N.I.H., Extramural,Research Support, Non-U.S. Gov't        |
| frizzled | sfrp1 | <a href="http://www.ncbi.nlm.nih.gov/entrez/query.fcgi?cmd=Retrieve&amp;db=pubmed&amp;dopt=Abstract&amp;list_uids=23028669">http://www.ncbi.nlm.nih.gov/entrez/query.fcgi?cmd=Retrieve&amp;db=pubmed&amp;dopt=Abstract&amp;list_uids=23028669</a> [6]PLoS One[7 9  2012 Journal Article,Research Support, N.I.H., Extramural                                                  |
| myoc     | top   | <a href="http://www.ncbi.nlm.nih.gov/entrez/query.fcgi?cmd=Retrieve&amp;db=pubmed&amp;dopt=Abstract&amp;list_uids=23028669">http://www.ncbi.nlm.nih.gov/entrez/query.fcgi?cmd=Retrieve&amp;db=pubmed&amp;dopt=Abstract&amp;list_uids=23028669</a> [6]PLoS One[7 9  2012 Journal Article,Research Support, N.I.H., Extramural                                                  |
| myoc     | fop   | <a href="http://www.ncbi.nlm.nih.gov/entrez/query.fcgi?cmd=Retrieve&amp;db=pubmed&amp;dopt=Abstract&amp;list_uids=23028669">http://www.ncbi.nlm.nih.gov/entrez/query.fcgi?cmd=Retrieve&amp;db=pubmed&amp;dopt=Abstract&amp;list_uids=23028669</a> [6]PLoS One[7 9  2012 Journal Article,Research Support, N.I.H., Extramural                                                  |
| top      | fop   | <a href="http://www.ncbi.nlm.nih.gov/entrez/query.fcgi?cmd=Retrieve&amp;db=pubmed&amp;dopt=Abstract&amp;list_uids=23028669">http://www.ncbi.nlm.nih.gov/entrez/query.fcgi?cmd=Retrieve&amp;db=pubmed&amp;dopt=Abstract&amp;list_uids=23028669</a> [6]PLoS One[7 9  2012 Journal Article,Research Support, N.I.H., Extramural                                                  |
| myoc     | actin | <a href="http://www.ncbi.nlm.nih.gov/entrez/query.fcgi?cmd=Retrieve&amp;db=pubmed&amp;dopt=Abstract&amp;list_uids=23028669">http://www.ncbi.nlm.nih.gov/entrez/query.fcgi?cmd=Retrieve&amp;db=pubmed&amp;dopt=Abstract&amp;list_uids=23028669</a> [6]PLoS One[7 9  2012 Journal Article,Research Support, N.I.H., Extramural                                                  |
| myoc     | rhoa  | <a href="http://www.ncbi.nlm.nih.gov/entrez/query.fcgi?cmd=Retrieve&amp;db=pubmed&amp;dopt=Abstract&amp;list_uids=23028669">http://www.ncbi.nlm.nih.gov/entrez/query.fcgi?cmd=Retrieve&amp;db=pubmed&amp;dopt=Abstract&amp;list_uids=23028669</a> [6]PLoS One[7 9  2012 Journal Article,Research Support, N.I.H., Extramural                                                  |
| sfrp1    | myoc  | <a href="http://www.ncbi.nlm.nih.gov/entrez/query.fcgi?cmd=Retrieve&amp;db=pubmed&amp;dopt=Abstract&amp;list_uids=23028669">http://www.ncbi.nlm.nih.gov/entrez/query.fcgi?cmd=Retrieve&amp;db=pubmed&amp;dopt=Abstract&amp;list_uids=23028669</a> [6]PLoS One[7 9  2012 Journal Article,Research Support, N.I.H., Extramural                                                  |
| igf1     | egf   | <a href="http://www.ncbi.nlm.nih.gov/entrez/query.fcgi?cmd=Retrieve&amp;db=pubmed&amp;dopt=Abstract&amp;list_uids=23023326">http://www.ncbi.nlm.nih.gov/entrez/query.fcgi?cmd=Retrieve&amp;db=pubmed&amp;dopt=Abstract&amp;list_uids=23023326</a> [6]Int J Oncol[41 6 Dec 2012 Journal Article,Research Support, Non-U.S. Gov't                                               |
| apc      | akt1  | <a href="http://www.ncbi.nlm.nih.gov/entrez/query.fcgi?cmd=Retrieve&amp;db=pubmed&amp;dopt=Abstract&amp;list_uids=23011394">http://www.ncbi.nlm.nih.gov/entrez/query.fcgi?cmd=Retrieve&amp;db=pubmed&amp;dopt=Abstract&amp;list_uids=23011394</a> [6]Circ Res[111 12 Dec 2012 Journal Article,Research Support, N.I.H., Extramural,Research Support, Non-U.S. Gov't           |
| pik3ca   | src   | <a href="http://www.ncbi.nlm.nih.gov/entrez/query.fcgi?cmd=Retrieve&amp;db=pubmed&amp;dopt=Abstract&amp;list_uids=22969158">http://www.ncbi.nlm.nih.gov/entrez/query.fcgi?cmd=Retrieve&amp;db=pubmed&amp;dopt=Abstract&amp;list_uids=22969158</a> [6]Sci Signal[5 241  2012 Journal Article,Research Support, N.I.H., Extramural,Research Support, Non-U.S. Gov't             |
| pik3ca   | inpp1 | <a href="http://www.ncbi.nlm.nih.gov/entrez/query.fcgi?cmd=Retrieve&amp;db=pubmed&amp;dopt=Abstract&amp;list_uids=22969158">http://www.ncbi.nlm.nih.gov/entrez/query.fcgi?cmd=Retrieve&amp;db=pubmed&amp;dopt=Abstract&amp;list_uids=22969158</a> [6]Sci Signal[5 241  2012 Journal Article,Research Support, N.I.H., Extramural,Research Support, Non-U.S. Gov't             |
| src      | inpp1 | <a href="http://www.ncbi.nlm.nih.gov/entrez/query.fcgi?cmd=Retrieve&amp;db=pubmed&amp;dopt=Abstract&amp;list_uids=22969158">http://www.ncbi.nlm.nih.gov/entrez/query.fcgi?cmd=Retrieve&amp;db=pubmed&amp;dopt=Abstract&amp;list_uids=22969158</a> [6]Sci Signal[5 241  2012 Journal Article,Research Support, N.I.H., Extramural,Research Support, Non-U.S. Gov't             |
| pik3ca   | pten  | <a href="http://www.ncbi.nlm.nih.gov/entrez/query.fcgi?cmd=Retrieve&amp;db=pubmed&amp;dopt=Abstract&amp;list_uids=22969158">http://www.ncbi.nlm.nih.gov/entrez/query.fcgi?cmd=Retrieve&amp;db=pubmed&amp;dopt=Abstract&amp;list_uids=22969158</a> [6]Sci Signal[5 241  2012 Journal Article,Research Support, N.I.H., Extramural,Research Support, Non-U.S. Gov't             |
| mapk3    | mapk9 | <a href="http://www.ncbi.nlm.nih.gov/entrez/query.fcgi?cmd=Retrieve&amp;db=pubmed&amp;dopt=Abstract&amp;list_uids=22966240">http://www.ncbi.nlm.nih.gov/entrez/query.fcgi?cmd=Retrieve&amp;db=pubmed&amp;dopt=Abstract&amp;list_uids=22966240</a> [6]Clin Dev Immunol[2012  2012 Journal Article,Research Support, Non-U.S. Gov't                                             |
| mapk3    | mapk8 | <a href="http://www.ncbi.nlm.nih.gov/entrez/query.fcgi?cmd=Retrieve&amp;db=pubmed&amp;dopt=Abstract&amp;list_uids=22966240">http://www.ncbi.nlm.nih.gov/entrez/query.fcgi?cmd=Retrieve&amp;db=pubmed&amp;dopt=Abstract&amp;list_uids=22966240</a> [6]Clin Dev Immunol[2012  2012 Journal Article,Research Support, Non-U.S. Gov't                                             |
| mapk9    | mapk8 | <a href="http://www.ncbi.nlm.nih.gov/entrez/query.fcgi?cmd=Retrieve&amp;db=pubmed&amp;dopt=Abstract&amp;list_uids=22966240">http://www.ncbi.nlm.nih.gov/entrez/query.fcgi?cmd=Retrieve&amp;db=pubmed&amp;dopt=Abstract&amp;list_uids=22966240</a> [6]Clin Dev Immunol[2012  2012 Journal Article,Research Support, Non-U.S. Gov't                                             |
| flna     | actin | <a href="http://www.ncbi.nlm.nih.gov/entrez/query.fcgi?cmd=Retrieve&amp;db=pubmed&amp;dopt=Abstract&amp;list_uids=22956851">http://www.ncbi.nlm.nih.gov/entrez/query.fcgi?cmd=Retrieve&amp;db=pubmed&amp;dopt=Abstract&amp;list_uids=22956851</a> [6]J Neurosci[32 36 Sep 2012 Journal Article,Research Support, N.I.H., Extramural,Research Support, Non-U.S. Gov't,Research |



|         |         |                                                                                                                                                                                                                                                                                                                                                                                                               |
|---------|---------|---------------------------------------------------------------------------------------------------------------------------------------------------------------------------------------------------------------------------------------------------------------------------------------------------------------------------------------------------------------------------------------------------------------|
|         |         | Support, U.S. Gov't, Non-P.H.S.                                                                                                                                                                                                                                                                                                                                                                               |
| arfgef2 | actin   | <a href="http://www.ncbi.nlm.nih.gov/entrez/query.fcgi?cmd=Retrieve&amp;db=pubmed&amp;dopt=Abstract&amp;list_uids=22956851">http://www.ncbi.nlm.nih.gov/entrez/query.fcgi?cmd=Retrieve&amp;db=pubmed&amp;dopt=Abstract&amp;list_uids=22956851</a>  6 J Neurosci 32 36 Sep 2012 Journal Article,Research Support, N.I.H., Extramural,Research Support, Non-U.S. Gov't,Research Support, U.S. Gov't, Non-P.H.S. |
| fam123a | arhgef2 | <a href="http://www.ncbi.nlm.nih.gov/entrez/query.fcgi?cmd=Retrieve&amp;db=pubmed&amp;dopt=Abstract&amp;list_uids=22949735">http://www.ncbi.nlm.nih.gov/entrez/query.fcgi?cmd=Retrieve&amp;db=pubmed&amp;dopt=Abstract&amp;list_uids=22949735</a>  6 Sci Signal 5 240 Sep 2012 Comparative Study,Journal Article,Research Support, N.I.H., Extramural,Research Support, Non-U.S. Gov't                        |
| fam123a | 3.6.4.1 | <a href="http://www.ncbi.nlm.nih.gov/entrez/query.fcgi?cmd=Retrieve&amp;db=pubmed&amp;dopt=Abstract&amp;list_uids=22949735">http://www.ncbi.nlm.nih.gov/entrez/query.fcgi?cmd=Retrieve&amp;db=pubmed&amp;dopt=Abstract&amp;list_uids=22949735</a>  6 Sci Signal 5 240 Sep 2012 Comparative Study,Journal Article,Research Support, N.I.H., Extramural,Research Support, Non-U.S. Gov't                        |
| arhgef2 | 3.6.4.1 | <a href="http://www.ncbi.nlm.nih.gov/entrez/query.fcgi?cmd=Retrieve&amp;db=pubmed&amp;dopt=Abstract&amp;list_uids=22949735">http://www.ncbi.nlm.nih.gov/entrez/query.fcgi?cmd=Retrieve&amp;db=pubmed&amp;dopt=Abstract&amp;list_uids=22949735</a>  6 Sci Signal 5 240 Sep 2012 Comparative Study,Journal Article,Research Support, N.I.H., Extramural,Research Support, Non-U.S. Gov't                        |
| snw1    | fam123a | <a href="http://www.ncbi.nlm.nih.gov/entrez/query.fcgi?cmd=Retrieve&amp;db=pubmed&amp;dopt=Abstract&amp;list_uids=22949735">http://www.ncbi.nlm.nih.gov/entrez/query.fcgi?cmd=Retrieve&amp;db=pubmed&amp;dopt=Abstract&amp;list_uids=22949735</a>  6 Sci Signal 5 240 Sep 2012 Comparative Study,Journal Article,Research Support, N.I.H., Extramural,Research Support, Non-U.S. Gov't                        |
| snw1    | cox7a2l | <a href="http://www.ncbi.nlm.nih.gov/entrez/query.fcgi?cmd=Retrieve&amp;db=pubmed&amp;dopt=Abstract&amp;list_uids=22949735">http://www.ncbi.nlm.nih.gov/entrez/query.fcgi?cmd=Retrieve&amp;db=pubmed&amp;dopt=Abstract&amp;list_uids=22949735</a>  6 Sci Signal 5 240 Sep 2012 Comparative Study,Journal Article,Research Support, N.I.H., Extramural,Research Support, Non-U.S. Gov't                        |
| snw1    | mapre3  | <a href="http://www.ncbi.nlm.nih.gov/entrez/query.fcgi?cmd=Retrieve&amp;db=pubmed&amp;dopt=Abstract&amp;list_uids=22949735">http://www.ncbi.nlm.nih.gov/entrez/query.fcgi?cmd=Retrieve&amp;db=pubmed&amp;dopt=Abstract&amp;list_uids=22949735</a>  6 Sci Signal 5 240 Sep 2012 Comparative Study,Journal Article,Research Support, N.I.H., Extramural,Research Support, Non-U.S. Gov't                        |
| fam123a | cox7a2l | <a href="http://www.ncbi.nlm.nih.gov/entrez/query.fcgi?cmd=Retrieve&amp;db=pubmed&amp;dopt=Abstract&amp;list_uids=22949735">http://www.ncbi.nlm.nih.gov/entrez/query.fcgi?cmd=Retrieve&amp;db=pubmed&amp;dopt=Abstract&amp;list_uids=22949735</a>  6 Sci Signal 5 240 Sep 2012 Comparative Study,Journal Article,Research Support, N.I.H., Extramural,Research Support, Non-U.S. Gov't                        |
| fam123a | mapre3  | <a href="http://www.ncbi.nlm.nih.gov/entrez/query.fcgi?cmd=Retrieve&amp;db=pubmed&amp;dopt=Abstract&amp;list_uids=22949735">http://www.ncbi.nlm.nih.gov/entrez/query.fcgi?cmd=Retrieve&amp;db=pubmed&amp;dopt=Abstract&amp;list_uids=22949735</a>  6 Sci Signal 5 240 Sep 2012 Comparative Study,Journal Article,Research Support, N.I.H., Extramural,Research Support, Non-U.S. Gov't                        |
| fam123a | rhoa    | <a href="http://www.ncbi.nlm.nih.gov/entrez/query.fcgi?cmd=Retrieve&amp;db=pubmed&amp;dopt=Abstract&amp;list_uids=22949735">http://www.ncbi.nlm.nih.gov/entrez/query.fcgi?cmd=Retrieve&amp;db=pubmed&amp;dopt=Abstract&amp;list_uids=22949735</a>  6 Sci Signal 5 240 Sep 2012 Comparative Study,Journal Article,Research Support, N.I.H., Extramural,Research Support, Non-U.S. Gov't                        |
| snw1    | 3.6.4.1 | <a href="http://www.ncbi.nlm.nih.gov/entrez/query.fcgi?cmd=Retrieve&amp;db=pubmed&amp;dopt=Abstract&amp;list_uids=22949735">http://www.ncbi.nlm.nih.gov/entrez/query.fcgi?cmd=Retrieve&amp;db=pubmed&amp;dopt=Abstract&amp;list_uids=22949735</a>  6 Sci Signal 5 240 Sep 2012 Comparative Study,Journal Article,Research Support, N.I.H., Extramural,Research Support, Non-U.S. Gov't                        |
| apbb1ip | mapk3   | <a href="http://www.ncbi.nlm.nih.gov/entrez/query.fcgi?cmd=Retrieve&amp;db=pubmed&amp;dopt=Abstract&amp;list_uids=22946047">http://www.ncbi.nlm.nih.gov/entrez/query.fcgi?cmd=Retrieve&amp;db=pubmed&amp;dopt=Abstract&amp;list_uids=22946047</a>  6 J Cell Sci 125 Pt 22 Nov 2012 Journal Article,Research Support, Non-U.S. Gov't                                                                           |

|         |          |                                                                                                                                                                                                                                                                                                                                                                                                                                                                                                                                                                                                                                                                                                                                   |
|---------|----------|-----------------------------------------------------------------------------------------------------------------------------------------------------------------------------------------------------------------------------------------------------------------------------------------------------------------------------------------------------------------------------------------------------------------------------------------------------------------------------------------------------------------------------------------------------------------------------------------------------------------------------------------------------------------------------------------------------------------------------------|
| apbb1ip | rhoa     | <a href="http://www.ncbi.nlm.nih.gov/entrez/query.fcgi?cmd=Retrieve&amp;db=pubmed&amp;dopt=Abstract&amp;list_uids=22946047">http://www.ncbi.nlm.nih.gov/entrez/query.fcgi?cmd=Retrieve&amp;db=pubmed&amp;dopt=Abstract&amp;list_uids=22946047</a>  6 J Cell Sci 125 Pt 22 Nov 2012 Journal Article,Research Support, Non-U.S. Gov't                                                                                                                                                                                                                                                                                                                                                                                               |
| uchl1   | ptk2     | <a href="http://www.ncbi.nlm.nih.gov/entrez/query.fcgi?cmd=Retrieve&amp;db=pubmed&amp;dopt=Abstract&amp;list_uids=22932395">http://www.ncbi.nlm.nih.gov/entrez/query.fcgi?cmd=Retrieve&amp;db=pubmed&amp;dopt=Abstract&amp;list_uids=22932395</a>  6 FASEB J 26 12 Dec 2012 Journal Article,Research Support, Non-U.S. Gov't                                                                                                                                                                                                                                                                                                                                                                                                      |
| uchl1   | akt1     | <a href="http://www.ncbi.nlm.nih.gov/entrez/query.fcgi?cmd=Retrieve&amp;db=pubmed&amp;dopt=Abstract&amp;list_uids=22932395">http://www.ncbi.nlm.nih.gov/entrez/query.fcgi?cmd=Retrieve&amp;db=pubmed&amp;dopt=Abstract&amp;list_uids=22932395</a>  6 FASEB J 26 12 Dec 2012 Journal Article,Research Support, Non-U.S. Gov't                                                                                                                                                                                                                                                                                                                                                                                                      |
| itk     | akt1     | <a href="http://www.ncbi.nlm.nih.gov/entrez/query.fcgi?cmd=Retrieve&amp;db=pubmed&amp;dopt=Abstract&amp;list_uids=22918955">http://www.ncbi.nlm.nih.gov/entrez/query.fcgi?cmd=Retrieve&amp;db=pubmed&amp;dopt=Abstract&amp;list_uids=22918955</a>  6 Mol Biol Cell 23 20 Oct 2012 Journal Article,Research Support, N.I.H., Extramural,Research Support, Non-U.S. Gov't                                                                                                                                                                                                                                                                                                                                                           |
| decr1   | itk      | <a href="http://www.ncbi.nlm.nih.gov/entrez/query.fcgi?cmd=Retrieve&amp;db=pubmed&amp;dopt=Abstract&amp;list_uids=22918955">http://www.ncbi.nlm.nih.gov/entrez/query.fcgi?cmd=Retrieve&amp;db=pubmed&amp;dopt=Abstract&amp;list_uids=22918955</a>  6 Mol Biol Cell 23 20 Oct 2012 Journal Article,Research Support, N.I.H., Extramural,Research Support, Non-U.S. Gov't                                                                                                                                                                                                                                                                                                                                                           |
| ptk2    | crk      | <a href="http://www.ncbi.nlm.nih.gov/entrez/query.fcgi?cmd=Retrieve&amp;db=pubmed&amp;dopt=Abstract&amp;list_uids=22915102">http://www.ncbi.nlm.nih.gov/entrez/query.fcgi?cmd=Retrieve&amp;db=pubmed&amp;dopt=Abstract&amp;list_uids=22915102</a>  6 J Neurosci 32 34 Aug 2012 Journal Article,Research Support, N.I.H., Extramural,Research Support, Non-U.S. Gov't,Validation Studies                                                                                                                                                                                                                                                                                                                                           |
| ptk2    | cse1l    | <a href="http://www.ncbi.nlm.nih.gov/entrez/query.fcgi?cmd=Retrieve&amp;db=pubmed&amp;dopt=Abstract&amp;list_uids=22287273">http://www.ncbi.nlm.nih.gov/entrez/query.fcgi?cmd=Retrieve&amp;db=pubmed&amp;dopt=Abstract&amp;list_uids=22287273</a>  6 J Cell Physiol 227 11 Nov 2012 Journal Article,Research Support, N.I.H., Extramural  <a href="http://www.ncbi.nlm.nih.gov/entrez/query.fcgi?cmd=Retrieve&amp;db=pubmed&amp;dopt=Abstract&amp;list_uids=22915102">http://www.ncbi.nlm.nih.gov/entrez/query.fcgi?cmd=Retrieve&amp;db=pubmed&amp;dopt=Abstract&amp;list_uids=22915102</a>  6 J Neurosci 32 34 Aug 2012 Journal Article,Research Support, N.I.H., Extramural,Research Support, Non-U.S. Gov't,Validation Studies |
| crk     | cse1l    | <a href="http://www.ncbi.nlm.nih.gov/entrez/query.fcgi?cmd=Retrieve&amp;db=pubmed&amp;dopt=Abstract&amp;list_uids=22915102">http://www.ncbi.nlm.nih.gov/entrez/query.fcgi?cmd=Retrieve&amp;db=pubmed&amp;dopt=Abstract&amp;list_uids=22915102</a>  6 J Neurosci 32 34 Aug 2012 Journal Article,Research Support, N.I.H., Extramural,Research Support, Non-U.S. Gov't,Validation Studies                                                                                                                                                                                                                                                                                                                                           |
| fas     | clathrin | <a href="http://www.ncbi.nlm.nih.gov/entrez/query.fcgi?cmd=Retrieve&amp;db=pubmed&amp;dopt=Abstract&amp;list_uids=22908306">http://www.ncbi.nlm.nih.gov/entrez/query.fcgi?cmd=Retrieve&amp;db=pubmed&amp;dopt=Abstract&amp;list_uids=22908306</a>  6 J Cell Biol 198 4 Aug 2012 Journal Article,Research Support, N.I.H., Extramural,Research Support, Non-U.S. Gov't,Review                                                                                                                                                                                                                                                                                                                                                      |
| git1    | pkd3     | <a href="http://www.ncbi.nlm.nih.gov/entrez/query.fcgi?cmd=Retrieve&amp;db=pubmed&amp;dopt=Abstract&amp;list_uids=22893698">http://www.ncbi.nlm.nih.gov/entrez/query.fcgi?cmd=Retrieve&amp;db=pubmed&amp;dopt=Abstract&amp;list_uids=22893698</a>  6 J Biol Chem 287 41 Oct 2012 Journal Article,Research Support, Non-U.S. Gov't                                                                                                                                                                                                                                                                                                                                                                                                 |
| atp8a2  | pip      | <a href="http://www.ncbi.nlm.nih.gov/entrez/query.fcgi?cmd=Retrieve&amp;db=pubmed&amp;dopt=Abstract&amp;list_uids=22879066">http://www.ncbi.nlm.nih.gov/entrez/query.fcgi?cmd=Retrieve&amp;db=pubmed&amp;dopt=Abstract&amp;list_uids=22879066</a>  6 Adv Exp Med Biol 986   2013 Journal Article,Review                                                                                                                                                                                                                                                                                                                                                                                                                           |
| atp8a2  | actin    | <a href="http://www.ncbi.nlm.nih.gov/entrez/query.fcgi?cmd=Retrieve&amp;db=pubmed&amp;dopt=Abstract&amp;list_uids=22879066">http://www.ncbi.nlm.nih.gov/entrez/query.fcgi?cmd=Retrieve&amp;db=pubmed&amp;dopt=Abstract&amp;list_uids=22879066</a>  6 Adv Exp Med Biol 986   2013 Journal Article,Review                                                                                                                                                                                                                                                                                                                                                                                                                           |
| atp8a2  | rac1     | <a href="http://www.ncbi.nlm.nih.gov/entrez/query.fcgi?cmd=Retrieve&amp;db=pubmed&amp;dopt=Abstract&amp;list_uids=22879066">http://www.ncbi.nlm.nih.gov/entrez/query.fcgi?cmd=Retrieve&amp;db=pubmed&amp;dopt=Abstract&amp;list_uids=22879066</a>  6 Adv Exp Med Biol 986   2013 Journal Article,Review                                                                                                                                                                                                                                                                                                                                                                                                                           |
| atp8a2  | rhoa     | <a href="http://www.ncbi.nlm.nih.gov/entrez/query.fcgi?cmd=Retrieve&amp;db=pubmed&amp;dopt=Abstract&amp;list_uids=22879066">http://www.ncbi.nlm.nih.gov/entrez/query.fcgi?cmd=Retrieve&amp;db=pubmed&amp;dopt=Abstract&amp;list_uids=22879066</a>  6 Adv Exp Med Biol 986   2013 Journal Article,Review                                                                                                                                                                                                                                                                                                                                                                                                                           |
| pip     | actin    | <a href="http://www.ncbi.nlm.nih.gov/entrez/query.fcgi?cmd=Retrieve&amp;db=pubmed&amp;dopt=Abstract&amp;list_uids=22879066">http://www.ncbi.nlm.nih.gov/entrez/query.fcgi?cmd=Retrieve&amp;db=pubmed&amp;dopt=Abstract&amp;list_uids=22879066</a>  6 Adv Exp Med Biol 986   2013 Journal Article,Review                                                                                                                                                                                                                                                                                                                                                                                                                           |
| pip     | rac1     | <a href="http://www.ncbi.nlm.nih.gov/entrez/query.fcgi?cmd=Retrieve&amp;db=pubmed&amp;dopt=Abstract&amp;list_uids=22879066">http://www.ncbi.nlm.nih.gov/entrez/query.fcgi?cmd=Retrieve&amp;db=pubmed&amp;dopt=Abstract&amp;list_uids=22879066</a>  6 Adv Exp                                                                                                                                                                                                                                                                                                                                                                                                                                                                      |

|       |         |                                                                                                                                                                                                                                                                                                                                                                           |
|-------|---------|---------------------------------------------------------------------------------------------------------------------------------------------------------------------------------------------------------------------------------------------------------------------------------------------------------------------------------------------------------------------------|
|       |         | Med Biol 986  2013 Journal Article,Review                                                                                                                                                                                                                                                                                                                                 |
| pip   | rhoa    | <a href="http://www.ncbi.nlm.nih.gov/entrez/query.fcgi?cmd=Retrieve&amp;db=pubmed&amp;dopt=Abstract&amp;list_uids=22879066">http://www.ncbi.nlm.nih.gov/entrez/query.fcgi?cmd=Retrieve&amp;db=pubmed&amp;dopt=Abstract&amp;list_uids=22879066</a>  6 Adv Exp Med Biol 986  2013 Journal Article,Review                                                                    |
| igf1  | akt1    | <a href="http://www.ncbi.nlm.nih.gov/entrez/query.fcgi?cmd=Retrieve&amp;db=pubmed&amp;dopt=Abstract&amp;list_uids=22859931">http://www.ncbi.nlm.nih.gov/entrez/query.fcgi?cmd=Retrieve&amp;db=pubmed&amp;dopt=Abstract&amp;list_uids=22859931</a>  6 PLoS One 7 6  2012 Journal Article,Research Support, N.I.H., Extramural,Research Support, Non-U.S. Gov't             |
| ptk2  | igf1r   | <a href="http://www.ncbi.nlm.nih.gov/entrez/query.fcgi?cmd=Retrieve&amp;db=pubmed&amp;dopt=Abstract&amp;list_uids=22859931">http://www.ncbi.nlm.nih.gov/entrez/query.fcgi?cmd=Retrieve&amp;db=pubmed&amp;dopt=Abstract&amp;list_uids=22859931</a>  6 PLoS One 7 6  2012 Journal Article,Research Support, N.I.H., Extramural,Research Support, Non-U.S. Gov't             |
| ptk2b | igf1r   | <a href="http://www.ncbi.nlm.nih.gov/entrez/query.fcgi?cmd=Retrieve&amp;db=pubmed&amp;dopt=Abstract&amp;list_uids=22859931">http://www.ncbi.nlm.nih.gov/entrez/query.fcgi?cmd=Retrieve&amp;db=pubmed&amp;dopt=Abstract&amp;list_uids=22859931</a>  6 PLoS One 7 6  2012 Journal Article,Research Support, N.I.H., Extramural,Research Support, Non-U.S. Gov't             |
| ptk2b | igf1    | <a href="http://www.ncbi.nlm.nih.gov/entrez/query.fcgi?cmd=Retrieve&amp;db=pubmed&amp;dopt=Abstract&amp;list_uids=22859931">http://www.ncbi.nlm.nih.gov/entrez/query.fcgi?cmd=Retrieve&amp;db=pubmed&amp;dopt=Abstract&amp;list_uids=22859931</a>  6 PLoS One 7 6  2012 Journal Article,Research Support, N.I.H., Extramural,Research Support, Non-U.S. Gov't             |
| ptk2b | akt1    | <a href="http://www.ncbi.nlm.nih.gov/entrez/query.fcgi?cmd=Retrieve&amp;db=pubmed&amp;dopt=Abstract&amp;list_uids=22859931">http://www.ncbi.nlm.nih.gov/entrez/query.fcgi?cmd=Retrieve&amp;db=pubmed&amp;dopt=Abstract&amp;list_uids=22859931</a>  6 PLoS One 7 6  2012 Journal Article,Research Support, N.I.H., Extramural,Research Support, Non-U.S. Gov't             |
| igf1r | akt1    | <a href="http://www.ncbi.nlm.nih.gov/entrez/query.fcgi?cmd=Retrieve&amp;db=pubmed&amp;dopt=Abstract&amp;list_uids=22859931">http://www.ncbi.nlm.nih.gov/entrez/query.fcgi?cmd=Retrieve&amp;db=pubmed&amp;dopt=Abstract&amp;list_uids=22859931</a>  6 PLoS One 7 6  2012 Journal Article,Research Support, N.I.H., Extramural,Research Support, Non-U.S. Gov't             |
| agxt  | plekhh2 | <a href="http://www.ncbi.nlm.nih.gov/entrez/query.fcgi?cmd=Retrieve&amp;db=pubmed&amp;dopt=Abstract&amp;list_uids=22832517">http://www.ncbi.nlm.nih.gov/entrez/query.fcgi?cmd=Retrieve&amp;db=pubmed&amp;dopt=Abstract&amp;list_uids=22832517</a>  6 Kidney Int 82 10 Nov 2012 Journal Article,Research Support, Non-U.S. Gov't,Video-Audio Media                         |
| nell1 | st2     | <a href="http://www.ncbi.nlm.nih.gov/entrez/query.fcgi?cmd=Retrieve&amp;db=pubmed&amp;dopt=Abstract&amp;list_uids=22807400">http://www.ncbi.nlm.nih.gov/entrez/query.fcgi?cmd=Retrieve&amp;db=pubmed&amp;dopt=Abstract&amp;list_uids=22807400</a>  6 J Cell Biochem 113 12 Dec 2012 Journal Article,Research Support, N.I.H., Extramural,Research Support, Non-U.S. Gov't |
| nox1  | decr1   | <a href="http://www.ncbi.nlm.nih.gov/entrez/query.fcgi?cmd=Retrieve&amp;db=pubmed&amp;dopt=Abstract&amp;list_uids=22773830">http://www.ncbi.nlm.nih.gov/entrez/query.fcgi?cmd=Retrieve&amp;db=pubmed&amp;dopt=Abstract&amp;list_uids=22773830</a>  6 J Biol Chem 287 35 Aug 2012 Journal Article                                                                          |
| p4hb  | nox1    | <a href="http://www.ncbi.nlm.nih.gov/entrez/query.fcgi?cmd=Retrieve&amp;db=pubmed&amp;dopt=Abstract&amp;list_uids=22773830">http://www.ncbi.nlm.nih.gov/entrez/query.fcgi?cmd=Retrieve&amp;db=pubmed&amp;dopt=Abstract&amp;list_uids=22773830</a>  6 J Biol Chem 287 35 Aug 2012 Journal Article                                                                          |
| p4hb  | nox4    | <a href="http://www.ncbi.nlm.nih.gov/entrez/query.fcgi?cmd=Retrieve&amp;db=pubmed&amp;dopt=Abstract&amp;list_uids=22773830">http://www.ncbi.nlm.nih.gov/entrez/query.fcgi?cmd=Retrieve&amp;db=pubmed&amp;dopt=Abstract&amp;list_uids=22773830</a>  6 J Biol Chem 287 35 Aug 2012 Journal Article                                                                          |
| nox1  | nox4    | <a href="http://www.ncbi.nlm.nih.gov/entrez/query.fcgi?cmd=Retrieve&amp;db=pubmed&amp;dopt=Abstract&amp;list_uids=22773830">http://www.ncbi.nlm.nih.gov/entrez/query.fcgi?cmd=Retrieve&amp;db=pubmed&amp;dopt=Abstract&amp;list_uids=22773830</a>  6 J Biol Chem 287 35 Aug 2012 Journal Article                                                                          |
| p4hb  | arhgdia | <a href="http://www.ncbi.nlm.nih.gov/entrez/query.fcgi?cmd=Retrieve&amp;db=pubmed&amp;dopt=Abstract&amp;list_uids=22773830">http://www.ncbi.nlm.nih.gov/entrez/query.fcgi?cmd=Retrieve&amp;db=pubmed&amp;dopt=Abstract&amp;list_uids=22773830</a>  6 J Biol Chem 287 35 Aug 2012 Journal Article                                                                          |
| ilk   | pik3ca  | <a href="http://www.ncbi.nlm.nih.gov/entrez/query.fcgi?cmd=Retrieve&amp;db=pubmed&amp;dopt=Abstract&amp;list_uids=22767580">http://www.ncbi.nlm.nih.gov/entrez/query.fcgi?cmd=Retrieve&amp;db=pubmed&amp;dopt=Abstract&amp;list_uids=22767580</a>  6 Mol Biol Cell 23 17 Sep 2012 Journal Article,Research Support, Non-U.S. Gov't                                        |
| ilk   | mmrn1   | <a href="http://www.ncbi.nlm.nih.gov/entrez/query.fcgi?cmd=Retrieve&amp;db=pubmed&amp;dopt=Abstract&amp;list_uids=22763012">http://www.ncbi.nlm.nih.gov/entrez/query.fcgi?cmd=Retrieve&amp;db=pubmed&amp;dopt=Abstract&amp;list_uids=22763012</a>  6 Curr Opin Cell Biol 24 5 Oct 2012 Journal Article,Research Support, N.I.H., Extramural,Review                        |
| tns4  | nt5c3   | <a href="http://www.ncbi.nlm.nih.gov/entrez/query.fcgi?cmd=Retrieve&amp;db=pubmed&amp;dopt=Abstract&amp;list_uids=22750970">http://www.ncbi.nlm.nih.gov/entrez/query.fcgi?cmd=Retrieve&amp;db=pubmed&amp;dopt=Abstract&amp;list_uids=22750970</a>  6 Pancreas 42 1 Jan 2013 Journal Article,Research Support, Non-U.S. Gov't                                              |

|      |       |                                                                                                                                                                                                                                                                                                                                                                                                                                                                                                                                                                                                                                                              |
|------|-------|--------------------------------------------------------------------------------------------------------------------------------------------------------------------------------------------------------------------------------------------------------------------------------------------------------------------------------------------------------------------------------------------------------------------------------------------------------------------------------------------------------------------------------------------------------------------------------------------------------------------------------------------------------------|
| tns4 | ilk   | <a href="http://www.ncbi.nlm.nih.gov/entrez/query.fcgi?cmd=Retrieve&amp;db=pubmed&amp;dopt=Abstract&amp;list_uids=22750970">http://www.ncbi.nlm.nih.gov/entrez/query.fcgi?cmd=Retrieve&amp;db=pubmed&amp;dopt=Abstract&amp;list_uids=22750970</a>  6 Pancreas 42 1 Jan 2013 Journal Article,Research Support, Non-U.S. Gov't                                                                                                                                                                                                                                                                                                                                 |
| ros1 | decr1 | <a href="http://www.ncbi.nlm.nih.gov/entrez/query.fcgi?cmd=Retrieve&amp;db=pubmed&amp;dopt=Abstract&amp;list_uids=22735335">http://www.ncbi.nlm.nih.gov/entrez/query.fcgi?cmd=Retrieve&amp;db=pubmed&amp;dopt=Abstract&amp;list_uids=22735335</a>  6 Mol Syst Biol 8  2012 Journal Article,Research Support, N.I.H., Extramural,Research Support, Non-U.S. Gov't                                                                                                                                                                                                                                                                                             |
| src  | ret   | <a href="http://www.ncbi.nlm.nih.gov/entrez/query.fcgi?cmd=Retrieve&amp;db=pubmed&amp;dopt=Abstract&amp;list_uids=22732841">http://www.ncbi.nlm.nih.gov/entrez/query.fcgi?cmd=Retrieve&amp;db=pubmed&amp;dopt=Abstract&amp;list_uids=22732841</a>  6 EMBO Rep 13 8 Aug 2012 Journal Article,Research Support, Non-U.S. Gov't                                                                                                                                                                                                                                                                                                                                 |
| ret  | ptk2  | <a href="http://www.ncbi.nlm.nih.gov/entrez/query.fcgi?cmd=Retrieve&amp;db=pubmed&amp;dopt=Abstract&amp;list_uids=22732841">http://www.ncbi.nlm.nih.gov/entrez/query.fcgi?cmd=Retrieve&amp;db=pubmed&amp;dopt=Abstract&amp;list_uids=22732841</a>  6 EMBO Rep 13 8 Aug 2012 Journal Article,Research Support, Non-U.S. Gov't                                                                                                                                                                                                                                                                                                                                 |
| lhx1 | lhx3  | <a href="http://www.ncbi.nlm.nih.gov/entrez/query.fcgi?cmd=Retrieve&amp;db=pubmed&amp;dopt=Abstract&amp;list_uids=22728435">http://www.ncbi.nlm.nih.gov/entrez/query.fcgi?cmd=Retrieve&amp;db=pubmed&amp;dopt=Abstract&amp;list_uids=22728435</a>  6 FEBS Lett 586 16 Jul 2012 Journal Article,Research Support, N.I.H., Extramural                                                                                                                                                                                                                                                                                                                          |
| lhx1 | akt1  | <a href="http://www.ncbi.nlm.nih.gov/entrez/query.fcgi?cmd=Retrieve&amp;db=pubmed&amp;dopt=Abstract&amp;list_uids=22728435">http://www.ncbi.nlm.nih.gov/entrez/query.fcgi?cmd=Retrieve&amp;db=pubmed&amp;dopt=Abstract&amp;list_uids=22728435</a>  6 FEBS Lett 586 16 Jul 2012 Journal Article,Research Support, N.I.H., Extramural                                                                                                                                                                                                                                                                                                                          |
| lhx3 | akt1  | <a href="http://www.ncbi.nlm.nih.gov/entrez/query.fcgi?cmd=Retrieve&amp;db=pubmed&amp;dopt=Abstract&amp;list_uids=22728435">http://www.ncbi.nlm.nih.gov/entrez/query.fcgi?cmd=Retrieve&amp;db=pubmed&amp;dopt=Abstract&amp;list_uids=22728435</a>  6 FEBS Lett 586 16 Jul 2012 Journal Article,Research Support, N.I.H., Extramural                                                                                                                                                                                                                                                                                                                          |
| rhob | akt1  | <a href="http://www.ncbi.nlm.nih.gov/entrez/query.fcgi?cmd=Retrieve&amp;db=pubmed&amp;dopt=Abstract&amp;list_uids=22724071">http://www.ncbi.nlm.nih.gov/entrez/query.fcgi?cmd=Retrieve&amp;db=pubmed&amp;dopt=Abstract&amp;list_uids=22724071</a>  6 Open Biol 2 5 May 2012 Journal Article,Research Support, Non-U.S. Gov't                                                                                                                                                                                                                                                                                                                                 |
| dym  | pvr1  | <a href="http://www.ncbi.nlm.nih.gov/entrez/query.fcgi?cmd=Retrieve&amp;db=pubmed&amp;dopt=Abstract&amp;list_uids=22721990">http://www.ncbi.nlm.nih.gov/entrez/query.fcgi?cmd=Retrieve&amp;db=pubmed&amp;dopt=Abstract&amp;list_uids=22721990</a>  6 Cardiovasc Res 95 3 Aug 2012 Journal Article,Research Support, Non-U.S. Gov't                                                                                                                                                                                                                                                                                                                           |
| dym  | rac1  | <a href="http://www.ncbi.nlm.nih.gov/entrez/query.fcgi?cmd=Retrieve&amp;db=pubmed&amp;dopt=Abstract&amp;list_uids=22721990">http://www.ncbi.nlm.nih.gov/entrez/query.fcgi?cmd=Retrieve&amp;db=pubmed&amp;dopt=Abstract&amp;list_uids=22721990</a>  6 Cardiovasc Res 95 3 Aug 2012 Journal Article,Research Support, Non-U.S. Gov't                                                                                                                                                                                                                                                                                                                           |
| dym  | rhoa  | <a href="http://www.ncbi.nlm.nih.gov/entrez/query.fcgi?cmd=Retrieve&amp;db=pubmed&amp;dopt=Abstract&amp;list_uids=22721990">http://www.ncbi.nlm.nih.gov/entrez/query.fcgi?cmd=Retrieve&amp;db=pubmed&amp;dopt=Abstract&amp;list_uids=22721990</a>  6 Cardiovasc Res 95 3 Aug 2012 Journal Article,Research Support, Non-U.S. Gov't                                                                                                                                                                                                                                                                                                                           |
| dym  | mtg1  | <a href="http://www.ncbi.nlm.nih.gov/entrez/query.fcgi?cmd=Retrieve&amp;db=pubmed&amp;dopt=Abstract&amp;list_uids=22721990">http://www.ncbi.nlm.nih.gov/entrez/query.fcgi?cmd=Retrieve&amp;db=pubmed&amp;dopt=Abstract&amp;list_uids=22721990</a>  6 Cardiovasc Res 95 3 Aug 2012 Journal Article,Research Support, Non-U.S. Gov't                                                                                                                                                                                                                                                                                                                           |
| rac1 | pvr1  | <a href="http://www.ncbi.nlm.nih.gov/entrez/query.fcgi?cmd=Retrieve&amp;db=pubmed&amp;dopt=Abstract&amp;list_uids=22721990">http://www.ncbi.nlm.nih.gov/entrez/query.fcgi?cmd=Retrieve&amp;db=pubmed&amp;dopt=Abstract&amp;list_uids=22721990</a>  6 Cardiovasc Res 95 3 Aug 2012 Journal Article,Research Support, Non-U.S. Gov't                                                                                                                                                                                                                                                                                                                           |
| rhoa | mtg1  | <a href="http://www.ncbi.nlm.nih.gov/entrez/query.fcgi?cmd=Retrieve&amp;db=pubmed&amp;dopt=Abstract&amp;list_uids=22348083">http://www.ncbi.nlm.nih.gov/entrez/query.fcgi?cmd=Retrieve&amp;db=pubmed&amp;dopt=Abstract&amp;list_uids=22348083</a>  6 PLoS One 7 2  2012 Journal Article,Research Support, Non-U.S. Gov't  <a href="http://www.ncbi.nlm.nih.gov/entrez/query.fcgi?cmd=Retrieve&amp;db=pubmed&amp;dopt=Abstract&amp;list_uids=22721990">http://www.ncbi.nlm.nih.gov/entrez/query.fcgi?cmd=Retrieve&amp;db=pubmed&amp;dopt=Abstract&amp;list_uids=22721990</a>  6 Cardiovasc Res 95 3 Aug 2012 Journal Article,Research Support, Non-U.S. Gov't |
| rhoa | pvr1  | <a href="http://www.ncbi.nlm.nih.gov/entrez/query.fcgi?cmd=Retrieve&amp;db=pubmed&amp;dopt=Abstract&amp;list_uids=22721990">http://www.ncbi.nlm.nih.gov/entrez/query.fcgi?cmd=Retrieve&amp;db=pubmed&amp;dopt=Abstract&amp;list_uids=22721990</a>  6 Cardiovasc Res 95 3 Aug 2012 Journal Article,Research Support, Non-U.S. Gov't                                                                                                                                                                                                                                                                                                                           |
| mtg1 | pvr1  | <a href="http://www.ncbi.nlm.nih.gov/entrez/query.fcgi?cmd=Retrieve&amp;db=pubmed&amp;dopt=Abstract&amp;list_uids=22721990">http://www.ncbi.nlm.nih.gov/entrez/query.fcgi?cmd=Retrieve&amp;db=pubmed&amp;dopt=Abstract&amp;list_uids=22721990</a>  6 Cardiovasc Res 95 3 Aug 2012 Journal Article,Research Support, Non-U.S. Gov't                                                                                                                                                                                                                                                                                                                           |
| ptk2 | dym   | <a href="http://www.ncbi.nlm.nih.gov/entrez/query.fcgi?cmd=Retrieve&amp;db=pubmed&amp;dopt=Abstract&amp;list_uids=22721990">http://www.ncbi.nlm.nih.gov/entrez/query.fcgi?cmd=Retrieve&amp;db=pubmed&amp;dopt=Abstract&amp;list_uids=22721990</a>  6 Cardiovasc Res 95 3 Aug 2012 Journal Article,Research Support, Non-U.S. Gov't                                                                                                                                                                                                                                                                                                                           |

|             |          |                                                                                                                                                                                                                                                                                                                                                                          |
|-------------|----------|--------------------------------------------------------------------------------------------------------------------------------------------------------------------------------------------------------------------------------------------------------------------------------------------------------------------------------------------------------------------------|
| ptk2        | pvr1     | <a href="http://www.ncbi.nlm.nih.gov/entrez/query.fcgi?cmd=Retrieve&amp;db=pubmed&amp;dopt=Abstract&amp;list_uids=22721990">http://www.ncbi.nlm.nih.gov/entrez/query.fcgi?cmd=Retrieve&amp;db=pubmed&amp;dopt=Abstract&amp;list_uids=22721990</a>  6 Cardiovascular Res 95 3 Aug 2012 Journal Article,Research Support, Non-U.S. Gov't                                   |
| map3k1<br>1 | tyr      | <a href="http://www.ncbi.nlm.nih.gov/entrez/query.fcgi?cmd=Retrieve&amp;db=pubmed&amp;dopt=Abstract&amp;list_uids=22700880">http://www.ncbi.nlm.nih.gov/entrez/query.fcgi?cmd=Retrieve&amp;db=pubmed&amp;dopt=Abstract&amp;list_uids=22700880</a>  6 Cancer Res 72 16 Aug 2012 Journal Article,Research Support, Non-U.S. Gov't,Research Support, U.S. Gov't, Non-P.H.S. |
| map3k1<br>1 | mapk8    | <a href="http://www.ncbi.nlm.nih.gov/entrez/query.fcgi?cmd=Retrieve&amp;db=pubmed&amp;dopt=Abstract&amp;list_uids=22700880">http://www.ncbi.nlm.nih.gov/entrez/query.fcgi?cmd=Retrieve&amp;db=pubmed&amp;dopt=Abstract&amp;list_uids=22700880</a>  6 Cancer Res 72 16 Aug 2012 Journal Article,Research Support, Non-U.S. Gov't,Research Support, U.S. Gov't, Non-P.H.S. |
| ahr         | src      | <a href="http://www.ncbi.nlm.nih.gov/entrez/query.fcgi?cmd=Retrieve&amp;db=pubmed&amp;dopt=Abstract&amp;list_uids=22665056">http://www.ncbi.nlm.nih.gov/entrez/query.fcgi?cmd=Retrieve&amp;db=pubmed&amp;dopt=Abstract&amp;list_uids=22665056</a>  6 Oncogene 32 14 Apr 2013 Journal Article,Research Support, Non-U.S. Gov't                                            |
| ahr         | ptk2     | <a href="http://www.ncbi.nlm.nih.gov/entrez/query.fcgi?cmd=Retrieve&amp;db=pubmed&amp;dopt=Abstract&amp;list_uids=22665056">http://www.ncbi.nlm.nih.gov/entrez/query.fcgi?cmd=Retrieve&amp;db=pubmed&amp;dopt=Abstract&amp;list_uids=22665056</a>  6 Oncogene 32 14 Apr 2013 Journal Article,Research Support, Non-U.S. Gov't                                            |
| ahr         | nedd9    | <a href="http://www.ncbi.nlm.nih.gov/entrez/query.fcgi?cmd=Retrieve&amp;db=pubmed&amp;dopt=Abstract&amp;list_uids=22665056">http://www.ncbi.nlm.nih.gov/entrez/query.fcgi?cmd=Retrieve&amp;db=pubmed&amp;dopt=Abstract&amp;list_uids=22665056</a>  6 Oncogene 32 14 Apr 2013 Journal Article,Research Support, Non-U.S. Gov't                                            |
| ptk2        | nedd9    | <a href="http://www.ncbi.nlm.nih.gov/entrez/query.fcgi?cmd=Retrieve&amp;db=pubmed&amp;dopt=Abstract&amp;list_uids=22665056">http://www.ncbi.nlm.nih.gov/entrez/query.fcgi?cmd=Retrieve&amp;db=pubmed&amp;dopt=Abstract&amp;list_uids=22665056</a>  6 Oncogene 32 14 Apr 2013 Journal Article,Research Support, Non-U.S. Gov't                                            |
| iqgap1      | rac1     | <a href="http://www.ncbi.nlm.nih.gov/entrez/query.fcgi?cmd=Retrieve&amp;db=pubmed&amp;dopt=Abstract&amp;list_uids=22634185">http://www.ncbi.nlm.nih.gov/entrez/query.fcgi?cmd=Retrieve&amp;db=pubmed&amp;dopt=Abstract&amp;list_uids=22634185</a>  6 Cell Signal 24 9 Sep 2012 Journal Article,Research Support, Non-U.S. Gov't                                          |
| iqgap1      | rhoa     | <a href="http://www.ncbi.nlm.nih.gov/entrez/query.fcgi?cmd=Retrieve&amp;db=pubmed&amp;dopt=Abstract&amp;list_uids=22634185">http://www.ncbi.nlm.nih.gov/entrez/query.fcgi?cmd=Retrieve&amp;db=pubmed&amp;dopt=Abstract&amp;list_uids=22634185</a>  6 Cell Signal 24 9 Sep 2012 Journal Article,Research Support, Non-U.S. Gov't                                          |
| itk         | mmrn1    | <a href="http://www.ncbi.nlm.nih.gov/entrez/query.fcgi?cmd=Retrieve&amp;db=pubmed&amp;dopt=Abstract&amp;list_uids=22605996">http://www.ncbi.nlm.nih.gov/entrez/query.fcgi?cmd=Retrieve&amp;db=pubmed&amp;dopt=Abstract&amp;list_uids=22605996</a>  6 Int J Mol Sci 13 4  2012 Journal Article,Research Support, Non-U.S. Gov't,Review                                    |
| dspp        | actin    | <a href="http://www.ncbi.nlm.nih.gov/entrez/query.fcgi?cmd=Retrieve&amp;db=pubmed&amp;dopt=Abstract&amp;list_uids=22588498">http://www.ncbi.nlm.nih.gov/entrez/query.fcgi?cmd=Retrieve&amp;db=pubmed&amp;dopt=Abstract&amp;list_uids=22588498</a>  6 Cell Adh Migr 6 4  2012 Journal Article,Research Support, N.I.H., Extramural,Research Support, Non-U.S. Gov't       |
| egf         | slc12a2  | <a href="http://www.ncbi.nlm.nih.gov/entrez/query.fcgi?cmd=Retrieve&amp;db=pubmed&amp;dopt=Abstract&amp;list_uids=22570591">http://www.ncbi.nlm.nih.gov/entrez/query.fcgi?cmd=Retrieve&amp;db=pubmed&amp;dopt=Abstract&amp;list_uids=22570591</a>  6 PLoS Biol 10 5  2012 Journal Article,Research Support, N.I.H., Extramural,Research Support, Non-U.S. Gov't          |
| tax1bp3     | bcatenin | <a href="http://www.ncbi.nlm.nih.gov/entrez/query.fcgi?cmd=Retrieve&amp;db=pubmed&amp;dopt=Abstract&amp;list_uids=22564736">http://www.ncbi.nlm.nih.gov/entrez/query.fcgi?cmd=Retrieve&amp;db=pubmed&amp;dopt=Abstract&amp;list_uids=22564736</a>  6 Biochem Biophys Res Commun 422 1 May 2012 Journal Article,Research Support, N.I.H., Extramural                      |
| dync1i2     | pkc      | <a href="http://www.ncbi.nlm.nih.gov/entrez/query.fcgi?cmd=Retrieve&amp;db=pubmed&amp;dopt=Abstract&amp;list_uids=22553211">http://www.ncbi.nlm.nih.gov/entrez/query.fcgi?cmd=Retrieve&amp;db=pubmed&amp;dopt=Abstract&amp;list_uids=22553211</a>  6 J Cell Sci 125 Pt 16 Aug 2012 Journal Article,Research Support, Non-U.S. Gov't                                      |
| actin       | ptgs2    | <a href="http://www.ncbi.nlm.nih.gov/entrez/query.fcgi?cmd=Retrieve&amp;db=pubmed&amp;dopt=Abstract&amp;list_uids=22542712">http://www.ncbi.nlm.nih.gov/entrez/query.fcgi?cmd=Retrieve&amp;db=pubmed&amp;dopt=Abstract&amp;list_uids=22542712</a>  6 Exp Mol Pathol 93 1 Aug 2012 Journal Article,Research Support, N.I.H., Extramural                                   |
| ptk2        | ptgs2    | <a href="http://www.ncbi.nlm.nih.gov/entrez/query.fcgi?cmd=Retrieve&amp;db=pubmed&amp;dopt=Abstract&amp;list_uids=22542712">http://www.ncbi.nlm.nih.gov/entrez/query.fcgi?cmd=Retrieve&amp;db=pubmed&amp;dopt=Abstract&amp;list_uids=22542712</a>  6 Exp Mol Pathol 93 1 Aug 2012 Journal Article,Research Support, N.I.H., Extramural                                   |
| ptk2        | mylk     | <a href="http://www.ncbi.nlm.nih.gov/entrez/query.fcgi?cmd=Retrieve&amp;db=pubmed&amp;dopt=Abstract&amp;list_uids=22542712">http://www.ncbi.nlm.nih.gov/entrez/query.fcgi?cmd=Retrieve&amp;db=pubmed&amp;dopt=Abstract&amp;list_uids=22542712</a>  6 Exp Mol Pathol 93 1 Aug 2012 Journal Article,Research Support, N.I.H., Extramural                                   |
| ptk2        | edn1     | <a href="http://www.ncbi.nlm.nih.gov/entrez/query.fcgi?cmd=Retrieve&amp;db=pubmed&amp;dopt=Abstract&amp;list_uids=22542712">http://www.ncbi.nlm.nih.gov/entrez/query.fcgi?cmd=Retrieve&amp;db=pubmed&amp;dopt=Abstract&amp;list_uids=22542712</a>  6 Exp Mol Pathol 93 1 Aug 2012 Journal Article,Research Support, N.I.H., Extramural                                   |

|        |          |                                                                                                                                                                                                                                                                                                                                                                     |
|--------|----------|---------------------------------------------------------------------------------------------------------------------------------------------------------------------------------------------------------------------------------------------------------------------------------------------------------------------------------------------------------------------|
| mylk   | edn1     | <a href="http://www.ncbi.nlm.nih.gov/entrez/query.fcgi?cmd=Retrieve&amp;db=pubmed&amp;dopt=Abstract&amp;list_uids=22542712">http://www.ncbi.nlm.nih.gov/entrez/query.fcgi?cmd=Retrieve&amp;db=pubmed&amp;dopt=Abstract&amp;list_uids=22542712</a>  6 Exp Mol Pathol 93 1 Aug 2012 Journal Article,Research Support, N.I.H., Extramural                              |
| laspl  | actin    | <a href="http://www.ncbi.nlm.nih.gov/entrez/query.fcgi?cmd=Retrieve&amp;db=pubmed&amp;dopt=Abstract&amp;list_uids=22514729">http://www.ncbi.nlm.nih.gov/entrez/query.fcgi?cmd=Retrieve&amp;db=pubmed&amp;dopt=Abstract&amp;list_uids=22514729</a>  6 PLoS One 7 4  2012 Journal Article,Research Support, Non-U.S. Gov't                                            |
| lgals3 | rhoa     | <a href="http://www.ncbi.nlm.nih.gov/entrez/query.fcgi?cmd=Retrieve&amp;db=pubmed&amp;dopt=Abstract&amp;list_uids=22513979">http://www.ncbi.nlm.nih.gov/entrez/query.fcgi?cmd=Retrieve&amp;db=pubmed&amp;dopt=Abstract&amp;list_uids=22513979</a>  6 J Pathol 228 1 Sep 2012 Journal Article,Research Support, Non-U.S. Gov't                                       |
| lgals3 | atm      | <a href="http://www.ncbi.nlm.nih.gov/entrez/query.fcgi?cmd=Retrieve&amp;db=pubmed&amp;dopt=Abstract&amp;list_uids=22513979">http://www.ncbi.nlm.nih.gov/entrez/query.fcgi?cmd=Retrieve&amp;db=pubmed&amp;dopt=Abstract&amp;list_uids=22513979</a>  6 J Pathol 228 1 Sep 2012 Journal Article,Research Support, Non-U.S. Gov't                                       |
| lgals3 | traf3ip2 | <a href="http://www.ncbi.nlm.nih.gov/entrez/query.fcgi?cmd=Retrieve&amp;db=pubmed&amp;dopt=Abstract&amp;list_uids=22513979">http://www.ncbi.nlm.nih.gov/entrez/query.fcgi?cmd=Retrieve&amp;db=pubmed&amp;dopt=Abstract&amp;list_uids=22513979</a>  6 J Pathol 228 1 Sep 2012 Journal Article,Research Support, Non-U.S. Gov't                                       |
| cav1   | rhoa     | <a href="http://www.ncbi.nlm.nih.gov/entrez/query.fcgi?cmd=Retrieve&amp;db=pubmed&amp;dopt=Abstract&amp;list_uids=22513979">http://www.ncbi.nlm.nih.gov/entrez/query.fcgi?cmd=Retrieve&amp;db=pubmed&amp;dopt=Abstract&amp;list_uids=22513979</a>  6 J Pathol 228 1 Sep 2012 Journal Article,Research Support, Non-U.S. Gov't                                       |
| cav1   | atm      | <a href="http://www.ncbi.nlm.nih.gov/entrez/query.fcgi?cmd=Retrieve&amp;db=pubmed&amp;dopt=Abstract&amp;list_uids=22513979">http://www.ncbi.nlm.nih.gov/entrez/query.fcgi?cmd=Retrieve&amp;db=pubmed&amp;dopt=Abstract&amp;list_uids=22513979</a>  6 J Pathol 228 1 Sep 2012 Journal Article,Research Support, Non-U.S. Gov't                                       |
| cav1   | traf3ip2 | <a href="http://www.ncbi.nlm.nih.gov/entrez/query.fcgi?cmd=Retrieve&amp;db=pubmed&amp;dopt=Abstract&amp;list_uids=22513979">http://www.ncbi.nlm.nih.gov/entrez/query.fcgi?cmd=Retrieve&amp;db=pubmed&amp;dopt=Abstract&amp;list_uids=22513979</a>  6 J Pathol 228 1 Sep 2012 Journal Article,Research Support, Non-U.S. Gov't                                       |
| rhoa   | atm      | <a href="http://www.ncbi.nlm.nih.gov/entrez/query.fcgi?cmd=Retrieve&amp;db=pubmed&amp;dopt=Abstract&amp;list_uids=22513979">http://www.ncbi.nlm.nih.gov/entrez/query.fcgi?cmd=Retrieve&amp;db=pubmed&amp;dopt=Abstract&amp;list_uids=22513979</a>  6 J Pathol 228 1 Sep 2012 Journal Article,Research Support, Non-U.S. Gov't                                       |
| rhoa   | traf3ip2 | <a href="http://www.ncbi.nlm.nih.gov/entrez/query.fcgi?cmd=Retrieve&amp;db=pubmed&amp;dopt=Abstract&amp;list_uids=22513979">http://www.ncbi.nlm.nih.gov/entrez/query.fcgi?cmd=Retrieve&amp;db=pubmed&amp;dopt=Abstract&amp;list_uids=22513979</a>  6 J Pathol 228 1 Sep 2012 Journal Article,Research Support, Non-U.S. Gov't                                       |
| ptk2   | atm      | <a href="http://www.ncbi.nlm.nih.gov/entrez/query.fcgi?cmd=Retrieve&amp;db=pubmed&amp;dopt=Abstract&amp;list_uids=22513979">http://www.ncbi.nlm.nih.gov/entrez/query.fcgi?cmd=Retrieve&amp;db=pubmed&amp;dopt=Abstract&amp;list_uids=22513979</a>  6 J Pathol 228 1 Sep 2012 Journal Article,Research Support, Non-U.S. Gov't                                       |
| ptk2   | traf3ip2 | <a href="http://www.ncbi.nlm.nih.gov/entrez/query.fcgi?cmd=Retrieve&amp;db=pubmed&amp;dopt=Abstract&amp;list_uids=22513979">http://www.ncbi.nlm.nih.gov/entrez/query.fcgi?cmd=Retrieve&amp;db=pubmed&amp;dopt=Abstract&amp;list_uids=22513979</a>  6 J Pathol 228 1 Sep 2012 Journal Article,Research Support, Non-U.S. Gov't                                       |
| atm    | traf3ip2 | <a href="http://www.ncbi.nlm.nih.gov/entrez/query.fcgi?cmd=Retrieve&amp;db=pubmed&amp;dopt=Abstract&amp;list_uids=22513979">http://www.ncbi.nlm.nih.gov/entrez/query.fcgi?cmd=Retrieve&amp;db=pubmed&amp;dopt=Abstract&amp;list_uids=22513979</a>  6 J Pathol 228 1 Sep 2012 Journal Article,Research Support, Non-U.S. Gov't                                       |
| myh11  | myh14    | <a href="http://www.ncbi.nlm.nih.gov/entrez/query.fcgi?cmd=Retrieve&amp;db=pubmed&amp;dopt=Abstract&amp;list_uids=22511748">http://www.ncbi.nlm.nih.gov/entrez/query.fcgi?cmd=Retrieve&amp;db=pubmed&amp;dopt=Abstract&amp;list_uids=22511748</a>  6 Circ Res 110 11 May 2012 Journal Article,Research Support, N.I.H., Extramural,Research Support, Non-U.S. Gov't |
| myh11  | dym      | <a href="http://www.ncbi.nlm.nih.gov/entrez/query.fcgi?cmd=Retrieve&amp;db=pubmed&amp;dopt=Abstract&amp;list_uids=22511748">http://www.ncbi.nlm.nih.gov/entrez/query.fcgi?cmd=Retrieve&amp;db=pubmed&amp;dopt=Abstract&amp;list_uids=22511748</a>  6 Circ Res 110 11 May 2012 Journal Article,Research Support, N.I.H., Extramural,Research Support, Non-U.S. Gov't |
| myh14  | dym      | <a href="http://www.ncbi.nlm.nih.gov/entrez/query.fcgi?cmd=Retrieve&amp;db=pubmed&amp;dopt=Abstract&amp;list_uids=22511748">http://www.ncbi.nlm.nih.gov/entrez/query.fcgi?cmd=Retrieve&amp;db=pubmed&amp;dopt=Abstract&amp;list_uids=22511748</a>  6 Circ Res 110 11 May 2012 Journal Article,Research Support, N.I.H., Extramural,Research Support, Non-U.S. Gov't |
| tbx1   | ddr1     | <a href="http://www.ncbi.nlm.nih.gov/entrez/query.fcgi?cmd=Retrieve&amp;db=pubmed&amp;dopt=Abstract&amp;list_uids=22500976">http://www.ncbi.nlm.nih.gov/entrez/query.fcgi?cmd=Retrieve&amp;db=pubmed&amp;dopt=Abstract&amp;list_uids=22500976</a>  6 Radiat Oncol 7   2012 Journal Article,Research Support, Non-U.S. Gov't                                         |
| air    | mmp3     | <a href="http://www.ncbi.nlm.nih.gov/entrez/query.fcgi?cmd=Retrieve&amp;db=pubmed&amp;dopt=Abstract&amp;list_uids=22500976">http://www.ncbi.nlm.nih.gov/entrez/query.fcgi?cmd=Retrieve&amp;db=pubmed&amp;dopt=Abstract&amp;list_uids=22500976</a>  6 Radiat Oncol 7   2012 Journal Article,Research Support, Non-U.S. Gov't                                         |

|        |          |                                                                                                                                                                                                                                                                                                                                                                                                            |
|--------|----------|------------------------------------------------------------------------------------------------------------------------------------------------------------------------------------------------------------------------------------------------------------------------------------------------------------------------------------------------------------------------------------------------------------|
| air    | mmp1     | <a href="http://www.ncbi.nlm.nih.gov/entrez/query.fcgi?cmd=Retrieve&amp;db=pubmed&amp;dopt=Abstract&amp;list_uids=22500976">http://www.ncbi.nlm.nih.gov/entrez/query.fcgi?cmd=Retrieve&amp;db=pubmed&amp;dopt=Abstract&amp;list_uids=22500976</a>  6 Radiat Oncol 7   2012 Journal Article,Research Support, Non-U.S. Gov't                                                                                |
| mmp3   | mmp1     | <a href="http://www.ncbi.nlm.nih.gov/entrez/query.fcgi?cmd=Retrieve&amp;db=pubmed&amp;dopt=Abstract&amp;list_uids=22500976">http://www.ncbi.nlm.nih.gov/entrez/query.fcgi?cmd=Retrieve&amp;db=pubmed&amp;dopt=Abstract&amp;list_uids=22500976</a>  6 Radiat Oncol 7   2012 Journal Article,Research Support, Non-U.S. Gov't                                                                                |
| rhoa   | rieg2    | <a href="http://www.ncbi.nlm.nih.gov/entrez/query.fcgi?cmd=Retrieve&amp;db=pubmed&amp;dopt=Abstract&amp;list_uids=22500016">http://www.ncbi.nlm.nih.gov/entrez/query.fcgi?cmd=Retrieve&amp;db=pubmed&amp;dopt=Abstract&amp;list_uids=22500016</a>  6 J Biol Chem 287 23 Jun 2012 Journal Article                                                                                                           |
| src    | rapgef1  | <a href="http://www.ncbi.nlm.nih.gov/entrez/query.fcgi?cmd=Retrieve&amp;db=pubmed&amp;dopt=Abstract&amp;list_uids=22499769">http://www.ncbi.nlm.nih.gov/entrez/query.fcgi?cmd=Retrieve&amp;db=pubmed&amp;dopt=Abstract&amp;list_uids=22499769</a>  6 Mol Cell Proteomics 11 8 Aug 2012 Journal Article,Research Support, N.I.H., Extramural,Research Support, Non-U.S. Gov't                               |
| rap1a  | rapgef1  | <a href="http://www.ncbi.nlm.nih.gov/entrez/query.fcgi?cmd=Retrieve&amp;db=pubmed&amp;dopt=Abstract&amp;list_uids=22499769">http://www.ncbi.nlm.nih.gov/entrez/query.fcgi?cmd=Retrieve&amp;db=pubmed&amp;dopt=Abstract&amp;list_uids=22499769</a>  6 Mol Cell Proteomics 11 8 Aug 2012 Journal Article,Research Support, N.I.H., Extramural,Research Support, Non-U.S. Gov't                               |
| cox8a  | src      | <a href="http://www.ncbi.nlm.nih.gov/entrez/query.fcgi?cmd=Retrieve&amp;db=pubmed&amp;dopt=Abstract&amp;list_uids=22488171">http://www.ncbi.nlm.nih.gov/entrez/query.fcgi?cmd=Retrieve&amp;db=pubmed&amp;dopt=Abstract&amp;list_uids=22488171</a>  6 J Cancer Res Clin Oncol 138 8 Aug 2012 Journal Article                                                                                                |
| cox8a  | ptk2     | <a href="http://www.ncbi.nlm.nih.gov/entrez/query.fcgi?cmd=Retrieve&amp;db=pubmed&amp;dopt=Abstract&amp;list_uids=22488171">http://www.ncbi.nlm.nih.gov/entrez/query.fcgi?cmd=Retrieve&amp;db=pubmed&amp;dopt=Abstract&amp;list_uids=22488171</a>  6 J Cancer Res Clin Oncol 138 8 Aug 2012 Journal Article                                                                                                |
| cox8a  | serpinb3 | <a href="http://www.ncbi.nlm.nih.gov/entrez/query.fcgi?cmd=Retrieve&amp;db=pubmed&amp;dopt=Abstract&amp;list_uids=22488171">http://www.ncbi.nlm.nih.gov/entrez/query.fcgi?cmd=Retrieve&amp;db=pubmed&amp;dopt=Abstract&amp;list_uids=22488171</a>  6 J Cancer Res Clin Oncol 138 8 Aug 2012 Journal Article                                                                                                |
| src    | serpinb3 | <a href="http://www.ncbi.nlm.nih.gov/entrez/query.fcgi?cmd=Retrieve&amp;db=pubmed&amp;dopt=Abstract&amp;list_uids=22488171">http://www.ncbi.nlm.nih.gov/entrez/query.fcgi?cmd=Retrieve&amp;db=pubmed&amp;dopt=Abstract&amp;list_uids=22488171</a>  6 J Cancer Res Clin Oncol 138 8 Aug 2012 Journal Article                                                                                                |
| ptk2   | serpinb3 | <a href="http://www.ncbi.nlm.nih.gov/entrez/query.fcgi?cmd=Retrieve&amp;db=pubmed&amp;dopt=Abstract&amp;list_uids=22488171">http://www.ncbi.nlm.nih.gov/entrez/query.fcgi?cmd=Retrieve&amp;db=pubmed&amp;dopt=Abstract&amp;list_uids=22488171</a>  6 J Cancer Res Clin Oncol 138 8 Aug 2012 Journal Article                                                                                                |
| bcar1  | enah     | <a href="http://www.ncbi.nlm.nih.gov/entrez/query.fcgi?cmd=Retrieve&amp;db=pubmed&amp;dopt=Abstract&amp;list_uids=22456508">http://www.ncbi.nlm.nih.gov/entrez/query.fcgi?cmd=Retrieve&amp;db=pubmed&amp;dopt=Abstract&amp;list_uids=22456508</a>  6 Mol Biol Cell 23 10 May 2012 Journal Article,Research Support, N.I.H., Extramural,Research Support, Non-U.S. Gov't                                    |
| bcar1  | vasp     | <a href="http://www.ncbi.nlm.nih.gov/entrez/query.fcgi?cmd=Retrieve&amp;db=pubmed&amp;dopt=Abstract&amp;list_uids=22456508">http://www.ncbi.nlm.nih.gov/entrez/query.fcgi?cmd=Retrieve&amp;db=pubmed&amp;dopt=Abstract&amp;list_uids=22456508</a>  6 Mol Biol Cell 23 10 May 2012 Journal Article,Research Support, N.I.H., Extramural,Research Support, Non-U.S. Gov't                                    |
| sh2b3  | akt1     | <a href="http://www.ncbi.nlm.nih.gov/entrez/query.fcgi?cmd=Retrieve&amp;db=pubmed&amp;dopt=Abstract&amp;list_uids=22441983">http://www.ncbi.nlm.nih.gov/entrez/query.fcgi?cmd=Retrieve&amp;db=pubmed&amp;dopt=Abstract&amp;list_uids=22441983</a>  6 FASEB J 26 6 Jun 2012 Journal Article,Research Support, N.I.H., Extramural,Research Support, Non-U.S. Gov't                                           |
| sorbs3 | sorbs2   | <a href="http://www.ncbi.nlm.nih.gov/entrez/query.fcgi?cmd=Retrieve&amp;db=pubmed&amp;dopt=Abstract&amp;list_uids=22431180">http://www.ncbi.nlm.nih.gov/entrez/query.fcgi?cmd=Retrieve&amp;db=pubmed&amp;dopt=Abstract&amp;list_uids=22431180</a>  6 Med Mol Morphol 45 1 Dec 2012 Journal Article,Research Support, Non-U.S. Gov't                                                                        |
| ptk2   | s100p    | <a href="http://www.ncbi.nlm.nih.gov/entrez/query.fcgi?cmd=Retrieve&amp;db=pubmed&amp;dopt=Abstract&amp;list_uids=22399300">http://www.ncbi.nlm.nih.gov/entrez/query.fcgi?cmd=Retrieve&amp;db=pubmed&amp;dopt=Abstract&amp;list_uids=22399300</a>  6 J Biol Chem 287 19 May 2012 Journal Article,Research Support, Non-U.S. Gov't                                                                          |
| fas    | s100p    | <a href="http://www.ncbi.nlm.nih.gov/entrez/query.fcgi?cmd=Retrieve&amp;db=pubmed&amp;dopt=Abstract&amp;list_uids=22399300">http://www.ncbi.nlm.nih.gov/entrez/query.fcgi?cmd=Retrieve&amp;db=pubmed&amp;dopt=Abstract&amp;list_uids=22399300</a>  6 J Biol Chem 287 19 May 2012 Journal Article,Research Support, Non-U.S. Gov't                                                                          |
| junb   | tpm1     | <a href="http://www.ncbi.nlm.nih.gov/entrez/query.fcgi?cmd=Retrieve&amp;db=pubmed&amp;dopt=Abstract&amp;list_uids=22391036">http://www.ncbi.nlm.nih.gov/entrez/query.fcgi?cmd=Retrieve&amp;db=pubmed&amp;dopt=Abstract&amp;list_uids=22391036</a>  6 J Cell Biol 196 5 Mar 2012 Journal Article,Research Support, N.I.H., Extramural,Research Support, Non-U.S. Gov't,Research Support, U.S. Gov't, P.H.S. |
| junb   | actin    | <a href="http://www.ncbi.nlm.nih.gov/entrez/query.fcgi?cmd=Retrieve&amp;db=pubmed&amp;dopt=Abstract&amp;list_uids=22391036">http://www.ncbi.nlm.nih.gov/entrez/query.fcgi?cmd=Retrieve&amp;db=pubmed&amp;dopt=Abstract&amp;list_uids=22391036</a>  6 J Cell                                                                                                                                                |

|         |         |                                                                                                                                                                                                                                                                                                                                                                                                            |
|---------|---------|------------------------------------------------------------------------------------------------------------------------------------------------------------------------------------------------------------------------------------------------------------------------------------------------------------------------------------------------------------------------------------------------------------|
|         |         | Biol 196 5 Mar 2012 Journal Article,Research Support, N.I.H., Extramural,Research Support, Non-U.S. Gov't,Research Support, U.S. Gov't, P.H.S.                                                                                                                                                                                                                                                             |
| tpm1    | actin   | <a href="http://www.ncbi.nlm.nih.gov/entrez/query.fcgi?cmd=Retrieve&amp;db=pubmed&amp;dopt=Abstract&amp;list_uids=22391036">http://www.ncbi.nlm.nih.gov/entrez/query.fcgi?cmd=Retrieve&amp;db=pubmed&amp;dopt=Abstract&amp;list_uids=22391036</a>  6 J Cell Biol 196 5 Mar 2012 Journal Article,Research Support, N.I.H., Extramural,Research Support, Non-U.S. Gov't,Research Support, U.S. Gov't, P.H.S. |
| tnfsf13 | ptk2    | <a href="http://www.ncbi.nlm.nih.gov/entrez/query.fcgi?cmd=Retrieve&amp;db=pubmed&amp;dopt=Abstract&amp;list_uids=22364697">http://www.ncbi.nlm.nih.gov/entrez/query.fcgi?cmd=Retrieve&amp;db=pubmed&amp;dopt=Abstract&amp;list_uids=22364697</a>  6 Biomaterials 33 15 May 2012 Journal Article,Research Support, Non-U.S. Gov't                                                                          |
| tat     | angptl6 | <a href="http://www.ncbi.nlm.nih.gov/entrez/query.fcgi?cmd=Retrieve&amp;db=pubmed&amp;dopt=Abstract&amp;list_uids=22362758">http://www.ncbi.nlm.nih.gov/entrez/query.fcgi?cmd=Retrieve&amp;db=pubmed&amp;dopt=Abstract&amp;list_uids=22362758</a>  6 Arterioscler Thromb Vasc Biol 32 5 May 2012 Comparative Study,Journal Article,Research Support, Non-U.S. Gov't                                        |
| tat     | actin   | <a href="http://www.ncbi.nlm.nih.gov/entrez/query.fcgi?cmd=Retrieve&amp;db=pubmed&amp;dopt=Abstract&amp;list_uids=22362758">http://www.ncbi.nlm.nih.gov/entrez/query.fcgi?cmd=Retrieve&amp;db=pubmed&amp;dopt=Abstract&amp;list_uids=22362758</a>  6 Arterioscler Thromb Vasc Biol 32 5 May 2012 Comparative Study,Journal Article,Research Support, Non-U.S. Gov't                                        |
| tat     | kdr     | <a href="http://www.ncbi.nlm.nih.gov/entrez/query.fcgi?cmd=Retrieve&amp;db=pubmed&amp;dopt=Abstract&amp;list_uids=22362758">http://www.ncbi.nlm.nih.gov/entrez/query.fcgi?cmd=Retrieve&amp;db=pubmed&amp;dopt=Abstract&amp;list_uids=22362758</a>  6 Arterioscler Thromb Vasc Biol 32 5 May 2012 Comparative Study,Journal Article,Research Support, Non-U.S. Gov't                                        |
| angptl6 | actin   | <a href="http://www.ncbi.nlm.nih.gov/entrez/query.fcgi?cmd=Retrieve&amp;db=pubmed&amp;dopt=Abstract&amp;list_uids=22362758">http://www.ncbi.nlm.nih.gov/entrez/query.fcgi?cmd=Retrieve&amp;db=pubmed&amp;dopt=Abstract&amp;list_uids=22362758</a>  6 Arterioscler Thromb Vasc Biol 32 5 May 2012 Comparative Study,Journal Article,Research Support, Non-U.S. Gov't                                        |
| angptl6 | kdr     | <a href="http://www.ncbi.nlm.nih.gov/entrez/query.fcgi?cmd=Retrieve&amp;db=pubmed&amp;dopt=Abstract&amp;list_uids=22362758">http://www.ncbi.nlm.nih.gov/entrez/query.fcgi?cmd=Retrieve&amp;db=pubmed&amp;dopt=Abstract&amp;list_uids=22362758</a>  6 Arterioscler Thromb Vasc Biol 32 5 May 2012 Comparative Study,Journal Article,Research Support, Non-U.S. Gov't                                        |
| actin   | kdr     | <a href="http://www.ncbi.nlm.nih.gov/entrez/query.fcgi?cmd=Retrieve&amp;db=pubmed&amp;dopt=Abstract&amp;list_uids=22362758">http://www.ncbi.nlm.nih.gov/entrez/query.fcgi?cmd=Retrieve&amp;db=pubmed&amp;dopt=Abstract&amp;list_uids=22362758</a>  6 Arterioscler Thromb Vasc Biol 32 5 May 2012 Comparative Study,Journal Article,Research Support, Non-U.S. Gov't                                        |
| kdr     | ephb2   | <a href="http://www.ncbi.nlm.nih.gov/entrez/query.fcgi?cmd=Retrieve&amp;db=pubmed&amp;dopt=Abstract&amp;list_uids=22362758">http://www.ncbi.nlm.nih.gov/entrez/query.fcgi?cmd=Retrieve&amp;db=pubmed&amp;dopt=Abstract&amp;list_uids=22362758</a>  6 Arterioscler Thromb Vasc Biol 32 5 May 2012 Comparative Study,Journal Article,Research Support, Non-U.S. Gov't                                        |
| ephb2   | tat     | <a href="http://www.ncbi.nlm.nih.gov/entrez/query.fcgi?cmd=Retrieve&amp;db=pubmed&amp;dopt=Abstract&amp;list_uids=22362758">http://www.ncbi.nlm.nih.gov/entrez/query.fcgi?cmd=Retrieve&amp;db=pubmed&amp;dopt=Abstract&amp;list_uids=22362758</a>  6 Arterioscler Thromb Vasc Biol 32 5 May 2012 Comparative Study,Journal Article,Research Support, Non-U.S. Gov't                                        |
| src     | ilk     | <a href="http://www.ncbi.nlm.nih.gov/entrez/query.fcgi?cmd=Retrieve&amp;db=pubmed&amp;dopt=Abstract&amp;list_uids=22357970">http://www.ncbi.nlm.nih.gov/entrez/query.fcgi?cmd=Retrieve&amp;db=pubmed&amp;dopt=Abstract&amp;list_uids=22357970</a>  6 J Cell Sci 125 Pt 2 Jan 2012 Journal Article,Research Support, Non-U.S. Gov't                                                                         |
| egf     | ilk     | <a href="http://www.ncbi.nlm.nih.gov/entrez/query.fcgi?cmd=Retrieve&amp;db=pubmed&amp;dopt=Abstract&amp;list_uids=22357970">http://www.ncbi.nlm.nih.gov/entrez/query.fcgi?cmd=Retrieve&amp;db=pubmed&amp;dopt=Abstract&amp;list_uids=22357970</a>  6 J Cell Sci 125 Pt 2 Jan 2012 Journal Article,Research Support, Non-U.S. Gov't                                                                         |
| egf     | cyld    | <a href="http://www.ncbi.nlm.nih.gov/entrez/query.fcgi?cmd=Retrieve&amp;db=pubmed&amp;dopt=Abstract&amp;list_uids=22357970">http://www.ncbi.nlm.nih.gov/entrez/query.fcgi?cmd=Retrieve&amp;db=pubmed&amp;dopt=Abstract&amp;list_uids=22357970</a>  6 J Cell Sci 125 Pt 2 Jan 2012 Journal Article,Research Support, Non-U.S. Gov't                                                                         |
| cyld    | src     | <a href="http://www.ncbi.nlm.nih.gov/entrez/query.fcgi?cmd=Retrieve&amp;db=pubmed&amp;dopt=Abstract&amp;list_uids=22357970">http://www.ncbi.nlm.nih.gov/entrez/query.fcgi?cmd=Retrieve&amp;db=pubmed&amp;dopt=Abstract&amp;list_uids=22357970</a>  6 J Cell Sci 125 Pt 2 Jan 2012 Journal Article,Research Support, Non-U.S. Gov't                                                                         |
| cyld    | actin   | <a href="http://www.ncbi.nlm.nih.gov/entrez/query.fcgi?cmd=Retrieve&amp;db=pubmed&amp;dopt=Abstract&amp;list_uids=22357970">http://www.ncbi.nlm.nih.gov/entrez/query.fcgi?cmd=Retrieve&amp;db=pubmed&amp;dopt=Abstract&amp;list_uids=22357970</a>  6 J Cell Sci 125 Pt 2 Jan 2012 Journal Article,Research Support, Non-U.S. Gov't                                                                         |
| angpt1  | tnfsf13 | <a href="http://www.ncbi.nlm.nih.gov/entrez/query.fcgi?cmd=Retrieve&amp;db=pubmed&amp;dopt=Abstract&amp;list_uids=22357955">http://www.ncbi.nlm.nih.gov/entrez/query.fcgi?cmd=Retrieve&amp;db=pubmed&amp;dopt=Abstract&amp;list_uids=22357955</a>  6 J Cell Sci 125 Pt 9 May 2012 Journal Article,Research Support, Non-U.S. Gov't                                                                         |
| angpt1  | tek     | <a href="http://www.ncbi.nlm.nih.gov/entrez/query.fcgi?cmd=Retrieve&amp;db=pubmed&amp;dopt=Abstract&amp;list_uids=22357955">http://www.ncbi.nlm.nih.gov/entrez/query.fcgi?cmd=Retrieve&amp;db=pubmed&amp;dopt=Abstract&amp;list_uids=22357955</a>  6 J Cell                                                                                                                                                |



|         |        |                                                                                                                                                                                                                                                                                                                                                                        |
|---------|--------|------------------------------------------------------------------------------------------------------------------------------------------------------------------------------------------------------------------------------------------------------------------------------------------------------------------------------------------------------------------------|
|         |        | Sci 125 Pt 9 May 2012 Journal Article,Research Support, Non-U.S. Gov't                                                                                                                                                                                                                                                                                                 |
| angpt1  | angpt2 | <a href="http://www.ncbi.nlm.nih.gov/entrez/query.fcgi?cmd=Retrieve&amp;db=pubmed&amp;dopt=Abstract&amp;list_uids=22357955">http://www.ncbi.nlm.nih.gov/entrez/query.fcgi?cmd=Retrieve&amp;db=pubmed&amp;dopt=Abstract&amp;list_uids=22357955</a>  6 J Cell Sci 125 Pt 9 May 2012 Journal Article,Research Support, Non-U.S. Gov't                                     |
| tnfsf13 | tek    | <a href="http://www.ncbi.nlm.nih.gov/entrez/query.fcgi?cmd=Retrieve&amp;db=pubmed&amp;dopt=Abstract&amp;list_uids=22357955">http://www.ncbi.nlm.nih.gov/entrez/query.fcgi?cmd=Retrieve&amp;db=pubmed&amp;dopt=Abstract&amp;list_uids=22357955</a>  6 J Cell Sci 125 Pt 9 May 2012 Journal Article,Research Support, Non-U.S. Gov't                                     |
| tnfsf13 | angpt2 | <a href="http://www.ncbi.nlm.nih.gov/entrez/query.fcgi?cmd=Retrieve&amp;db=pubmed&amp;dopt=Abstract&amp;list_uids=22357955">http://www.ncbi.nlm.nih.gov/entrez/query.fcgi?cmd=Retrieve&amp;db=pubmed&amp;dopt=Abstract&amp;list_uids=22357955</a>  6 J Cell Sci 125 Pt 9 May 2012 Journal Article,Research Support, Non-U.S. Gov't                                     |
| tek     | angpt2 | <a href="http://www.ncbi.nlm.nih.gov/entrez/query.fcgi?cmd=Retrieve&amp;db=pubmed&amp;dopt=Abstract&amp;list_uids=22357955">http://www.ncbi.nlm.nih.gov/entrez/query.fcgi?cmd=Retrieve&amp;db=pubmed&amp;dopt=Abstract&amp;list_uids=22357955</a>  6 J Cell Sci 125 Pt 9 May 2012 Journal Article,Research Support, Non-U.S. Gov't                                     |
| hnrnpc  | rhoa   | <a href="http://www.ncbi.nlm.nih.gov/entrez/query.fcgi?cmd=Retrieve&amp;db=pubmed&amp;dopt=Abstract&amp;list_uids=22357624">http://www.ncbi.nlm.nih.gov/entrez/query.fcgi?cmd=Retrieve&amp;db=pubmed&amp;dopt=Abstract&amp;list_uids=22357624</a>  6 Mol Biol Cell 23 8 Apr 2012 Journal Article,Research Support, N.I.H., Extramural,Research Support, Non-U.S. Gov't |
| rock1   | rock2  | <a href="http://www.ncbi.nlm.nih.gov/entrez/query.fcgi?cmd=Retrieve&amp;db=pubmed&amp;dopt=Abstract&amp;list_uids=22348083">http://www.ncbi.nlm.nih.gov/entrez/query.fcgi?cmd=Retrieve&amp;db=pubmed&amp;dopt=Abstract&amp;list_uids=22348083</a>  6 PLoS One 7 2  2012 Journal Article,Research Support, Non-U.S. Gov't                                               |
| rock1   | mtg1   | <a href="http://www.ncbi.nlm.nih.gov/entrez/query.fcgi?cmd=Retrieve&amp;db=pubmed&amp;dopt=Abstract&amp;list_uids=22348083">http://www.ncbi.nlm.nih.gov/entrez/query.fcgi?cmd=Retrieve&amp;db=pubmed&amp;dopt=Abstract&amp;list_uids=22348083</a>  6 PLoS One 7 2  2012 Journal Article,Research Support, Non-U.S. Gov't                                               |
| rock1   | rhoa   | <a href="http://www.ncbi.nlm.nih.gov/entrez/query.fcgi?cmd=Retrieve&amp;db=pubmed&amp;dopt=Abstract&amp;list_uids=22348083">http://www.ncbi.nlm.nih.gov/entrez/query.fcgi?cmd=Retrieve&amp;db=pubmed&amp;dopt=Abstract&amp;list_uids=22348083</a>  6 PLoS One 7 2  2012 Journal Article,Research Support, Non-U.S. Gov't                                               |
| rock2   | mtg1   | <a href="http://www.ncbi.nlm.nih.gov/entrez/query.fcgi?cmd=Retrieve&amp;db=pubmed&amp;dopt=Abstract&amp;list_uids=22348083">http://www.ncbi.nlm.nih.gov/entrez/query.fcgi?cmd=Retrieve&amp;db=pubmed&amp;dopt=Abstract&amp;list_uids=22348083</a>  6 PLoS One 7 2  2012 Journal Article,Research Support, Non-U.S. Gov't                                               |
| rock2   | rhoa   | <a href="http://www.ncbi.nlm.nih.gov/entrez/query.fcgi?cmd=Retrieve&amp;db=pubmed&amp;dopt=Abstract&amp;list_uids=22348083">http://www.ncbi.nlm.nih.gov/entrez/query.fcgi?cmd=Retrieve&amp;db=pubmed&amp;dopt=Abstract&amp;list_uids=22348083</a>  6 PLoS One 7 2  2012 Journal Article,Research Support, Non-U.S. Gov't                                               |
| dlc1    | tns4   | <a href="http://www.ncbi.nlm.nih.gov/entrez/query.fcgi?cmd=Retrieve&amp;db=pubmed&amp;dopt=Abstract&amp;list_uids=22307599">http://www.ncbi.nlm.nih.gov/entrez/query.fcgi?cmd=Retrieve&amp;db=pubmed&amp;dopt=Abstract&amp;list_uids=22307599</a>  6 Proc Natl Acad Sci U S A 109 5 Jan 2012 Journal Article,Research Support, Non-U.S. Gov't                          |
| tns4    | egf    | <a href="http://www.ncbi.nlm.nih.gov/entrez/query.fcgi?cmd=Retrieve&amp;db=pubmed&amp;dopt=Abstract&amp;list_uids=22307599">http://www.ncbi.nlm.nih.gov/entrez/query.fcgi?cmd=Retrieve&amp;db=pubmed&amp;dopt=Abstract&amp;list_uids=22307599</a>  6 Proc Natl Acad Sci U S A 109 5 Jan 2012 Journal Article,Research Support, Non-U.S. Gov't                          |
| actin   | tns4   | <a href="http://www.ncbi.nlm.nih.gov/entrez/query.fcgi?cmd=Retrieve&amp;db=pubmed&amp;dopt=Abstract&amp;list_uids=22307599">http://www.ncbi.nlm.nih.gov/entrez/query.fcgi?cmd=Retrieve&amp;db=pubmed&amp;dopt=Abstract&amp;list_uids=22307599</a>  6 Proc Natl Acad Sci U S A 109 5 Jan 2012 Journal Article,Research Support, Non-U.S. Gov't                          |
| tns4    | rhoa   | <a href="http://www.ncbi.nlm.nih.gov/entrez/query.fcgi?cmd=Retrieve&amp;db=pubmed&amp;dopt=Abstract&amp;list_uids=22307599">http://www.ncbi.nlm.nih.gov/entrez/query.fcgi?cmd=Retrieve&amp;db=pubmed&amp;dopt=Abstract&amp;list_uids=22307599</a>  6 Proc Natl Acad Sci U S A 109 5 Jan 2012 Journal Article,Research Support, Non-U.S. Gov't                          |
| nrp2    | ptk2   | <a href="http://www.ncbi.nlm.nih.gov/entrez/query.fcgi?cmd=Retrieve&amp;db=pubmed&amp;dopt=Abstract&amp;list_uids=22302985">http://www.ncbi.nlm.nih.gov/entrez/query.fcgi?cmd=Retrieve&amp;db=pubmed&amp;dopt=Abstract&amp;list_uids=22302985</a>  6 J Cell Sci 125 Pt 2 Jan 2012 Journal Article,Research Support, N.I.H., Extramural                                 |
| nrp2    | src    | <a href="http://www.ncbi.nlm.nih.gov/entrez/query.fcgi?cmd=Retrieve&amp;db=pubmed&amp;dopt=Abstract&amp;list_uids=22302985">http://www.ncbi.nlm.nih.gov/entrez/query.fcgi?cmd=Retrieve&amp;db=pubmed&amp;dopt=Abstract&amp;list_uids=22302985</a>  6 J Cell Sci 125 Pt 2 Jan 2012 Journal Article,Research Support, N.I.H., Extramural                                 |
| nrp2    | pkc    | <a href="http://www.ncbi.nlm.nih.gov/entrez/query.fcgi?cmd=Retrieve&amp;db=pubmed&amp;dopt=Abstract&amp;list_uids=22302985">http://www.ncbi.nlm.nih.gov/entrez/query.fcgi?cmd=Retrieve&amp;db=pubmed&amp;dopt=Abstract&amp;list_uids=22302985</a>  6 J Cell Sci 125 Pt 2 Jan 2012 Journal Article,Research Support, N.I.H., Extramural                                 |

|         |       |                                                                                                                                                                                                                                                                                                                                                                         |
|---------|-------|-------------------------------------------------------------------------------------------------------------------------------------------------------------------------------------------------------------------------------------------------------------------------------------------------------------------------------------------------------------------------|
| tgm2    | mmrn1 | <a href="http://www.ncbi.nlm.nih.gov/entrez/query.fcgi?cmd=Retrieve&amp;db=pubmed&amp;dopt=Abstract&amp;list_uids=22298777">http://www.ncbi.nlm.nih.gov/entrez/query.fcgi?cmd=Retrieve&amp;db=pubmed&amp;dopt=Abstract&amp;list_uids=22298777</a>  6 J Biol Chem 287 16 Apr 2012 Journal Article,Research Support, Non-U.S. Gov't                                       |
| tgm2    | mapk3 | <a href="http://www.ncbi.nlm.nih.gov/entrez/query.fcgi?cmd=Retrieve&amp;db=pubmed&amp;dopt=Abstract&amp;list_uids=22298777">http://www.ncbi.nlm.nih.gov/entrez/query.fcgi?cmd=Retrieve&amp;db=pubmed&amp;dopt=Abstract&amp;list_uids=22298777</a>  6 J Biol Chem 287 16 Apr 2012 Journal Article,Research Support, Non-U.S. Gov't                                       |
| tgm2    | actin | <a href="http://www.ncbi.nlm.nih.gov/entrez/query.fcgi?cmd=Retrieve&amp;db=pubmed&amp;dopt=Abstract&amp;list_uids=22298777">http://www.ncbi.nlm.nih.gov/entrez/query.fcgi?cmd=Retrieve&amp;db=pubmed&amp;dopt=Abstract&amp;list_uids=22298777</a>  6 J Biol Chem 287 16 Apr 2012 Journal Article,Research Support, Non-U.S. Gov't                                       |
| mapk3   | actin | <a href="http://www.ncbi.nlm.nih.gov/entrez/query.fcgi?cmd=Retrieve&amp;db=pubmed&amp;dopt=Abstract&amp;list_uids=22298777">http://www.ncbi.nlm.nih.gov/entrez/query.fcgi?cmd=Retrieve&amp;db=pubmed&amp;dopt=Abstract&amp;list_uids=22298777</a>  6 J Biol Chem 287 16 Apr 2012 Journal Article,Research Support, Non-U.S. Gov't                                       |
| mmp14   | fas   | <a href="http://www.ncbi.nlm.nih.gov/entrez/query.fcgi?cmd=Retrieve&amp;db=pubmed&amp;dopt=Abstract&amp;list_uids=22291036">http://www.ncbi.nlm.nih.gov/entrez/query.fcgi?cmd=Retrieve&amp;db=pubmed&amp;dopt=Abstract&amp;list_uids=22291036</a>  6 J Cell Biol 196 3 Feb 2012 Journal Article,Research Support, N.I.H., Extramural                                    |
| mmp14   | src   | <a href="http://www.ncbi.nlm.nih.gov/entrez/query.fcgi?cmd=Retrieve&amp;db=pubmed&amp;dopt=Abstract&amp;list_uids=22291036">http://www.ncbi.nlm.nih.gov/entrez/query.fcgi?cmd=Retrieve&amp;db=pubmed&amp;dopt=Abstract&amp;list_uids=22291036</a>  6 J Cell Biol 196 3 Feb 2012 Journal Article,Research Support, N.I.H., Extramural                                    |
| mmp14   | tyr   | <a href="http://www.ncbi.nlm.nih.gov/entrez/query.fcgi?cmd=Retrieve&amp;db=pubmed&amp;dopt=Abstract&amp;list_uids=22291036">http://www.ncbi.nlm.nih.gov/entrez/query.fcgi?cmd=Retrieve&amp;db=pubmed&amp;dopt=Abstract&amp;list_uids=22291036</a>  6 J Cell Biol 196 3 Feb 2012 Journal Article,Research Support, N.I.H., Extramural                                    |
| mmp14   | mt1a  | <a href="http://www.ncbi.nlm.nih.gov/entrez/query.fcgi?cmd=Retrieve&amp;db=pubmed&amp;dopt=Abstract&amp;list_uids=22291036">http://www.ncbi.nlm.nih.gov/entrez/query.fcgi?cmd=Retrieve&amp;db=pubmed&amp;dopt=Abstract&amp;list_uids=22291036</a>  6 J Cell Biol 196 3 Feb 2012 Journal Article,Research Support, N.I.H., Extramural                                    |
| fas     | tyr   | <a href="http://www.ncbi.nlm.nih.gov/entrez/query.fcgi?cmd=Retrieve&amp;db=pubmed&amp;dopt=Abstract&amp;list_uids=22291036">http://www.ncbi.nlm.nih.gov/entrez/query.fcgi?cmd=Retrieve&amp;db=pubmed&amp;dopt=Abstract&amp;list_uids=22291036</a>  6 J Cell Biol 196 3 Feb 2012 Journal Article,Research Support, N.I.H., Extramural                                    |
| fas     | mt1a  | <a href="http://www.ncbi.nlm.nih.gov/entrez/query.fcgi?cmd=Retrieve&amp;db=pubmed&amp;dopt=Abstract&amp;list_uids=22291036">http://www.ncbi.nlm.nih.gov/entrez/query.fcgi?cmd=Retrieve&amp;db=pubmed&amp;dopt=Abstract&amp;list_uids=22291036</a>  6 J Cell Biol 196 3 Feb 2012 Journal Article,Research Support, N.I.H., Extramural                                    |
| src     | tyr   | <a href="http://www.ncbi.nlm.nih.gov/entrez/query.fcgi?cmd=Retrieve&amp;db=pubmed&amp;dopt=Abstract&amp;list_uids=22291036">http://www.ncbi.nlm.nih.gov/entrez/query.fcgi?cmd=Retrieve&amp;db=pubmed&amp;dopt=Abstract&amp;list_uids=22291036</a>  6 J Cell Biol 196 3 Feb 2012 Journal Article,Research Support, N.I.H., Extramural                                    |
| src     | mt1a  | <a href="http://www.ncbi.nlm.nih.gov/entrez/query.fcgi?cmd=Retrieve&amp;db=pubmed&amp;dopt=Abstract&amp;list_uids=22291036">http://www.ncbi.nlm.nih.gov/entrez/query.fcgi?cmd=Retrieve&amp;db=pubmed&amp;dopt=Abstract&amp;list_uids=22291036</a>  6 J Cell Biol 196 3 Feb 2012 Journal Article,Research Support, N.I.H., Extramural                                    |
| tyr     | mt1a  | <a href="http://www.ncbi.nlm.nih.gov/entrez/query.fcgi?cmd=Retrieve&amp;db=pubmed&amp;dopt=Abstract&amp;list_uids=22291036">http://www.ncbi.nlm.nih.gov/entrez/query.fcgi?cmd=Retrieve&amp;db=pubmed&amp;dopt=Abstract&amp;list_uids=22291036</a>  6 J Cell Biol 196 3 Feb 2012 Journal Article,Research Support, N.I.H., Extramural                                    |
| src     | mapk3 | <a href="http://www.ncbi.nlm.nih.gov/entrez/query.fcgi?cmd=Retrieve&amp;db=pubmed&amp;dopt=Abstract&amp;list_uids=22287273">http://www.ncbi.nlm.nih.gov/entrez/query.fcgi?cmd=Retrieve&amp;db=pubmed&amp;dopt=Abstract&amp;list_uids=22287273</a>  6 J Cell Physiol 227 11 Nov 2012 Journal Article,Research Support, N.I.H., Extramural                                |
| cse1l   | mapk3 | <a href="http://www.ncbi.nlm.nih.gov/entrez/query.fcgi?cmd=Retrieve&amp;db=pubmed&amp;dopt=Abstract&amp;list_uids=22287273">http://www.ncbi.nlm.nih.gov/entrez/query.fcgi?cmd=Retrieve&amp;db=pubmed&amp;dopt=Abstract&amp;list_uids=22287273</a>  6 J Cell Physiol 227 11 Nov 2012 Journal Article,Research Support, N.I.H., Extramural                                |
| igf2bp1 | zbp1  | <a href="http://www.ncbi.nlm.nih.gov/entrez/query.fcgi?cmd=Retrieve&amp;db=pubmed&amp;dopt=Abstract&amp;list_uids=22266909">http://www.ncbi.nlm.nih.gov/entrez/query.fcgi?cmd=Retrieve&amp;db=pubmed&amp;dopt=Abstract&amp;list_uids=22266909</a>  6 J Cell Sci 125 Pt 1 Jan 2012 Journal Article,Research Support, N.I.H., Extramural,Research Support, Non-U.S. Gov't |
| zbp1    | actr2 | <a href="http://www.ncbi.nlm.nih.gov/entrez/query.fcgi?cmd=Retrieve&amp;db=pubmed&amp;dopt=Abstract&amp;list_uids=22266909">http://www.ncbi.nlm.nih.gov/entrez/query.fcgi?cmd=Retrieve&amp;db=pubmed&amp;dopt=Abstract&amp;list_uids=22266909</a>  6 J Cell Sci 125 Pt 1 Jan 2012 Journal Article,Research Support, N.I.H., Extramural,Research Support, Non-U.S. Gov't |
| src     | myh14 | <a href="http://www.ncbi.nlm.nih.gov/entrez/query.fcgi?cmd=Retrieve&amp;db=pubmed&amp;dopt=Abstract&amp;list_uids=22266905">http://www.ncbi.nlm.nih.gov/entrez/query.fcgi?cmd=Retrieve&amp;db=pubmed&amp;dopt=Abstract&amp;list_uids=22266905</a>  6 J Cell Sci 125 Pt 1 Jan 2012 Journal Article,Research Support, Non-U.S. Gov't                                      |

|        |         |                                                                                                                                                                                                                                                                                                                                                                                         |
|--------|---------|-----------------------------------------------------------------------------------------------------------------------------------------------------------------------------------------------------------------------------------------------------------------------------------------------------------------------------------------------------------------------------------------|
| src    | mylk    | <a href="http://www.ncbi.nlm.nih.gov/entrez/query.fcgi?cmd=Retrieve&amp;db=pubmed&amp;dopt=Abstract&amp;list_uids=22266905">http://www.ncbi.nlm.nih.gov/entrez/query.fcgi?cmd=Retrieve&amp;db=pubmed&amp;dopt=Abstract&amp;list_uids=22266905</a>  6 J Cell Sci 125 Pt 1 Jan 2012 Journal Article,Research Support, Non-U.S. Gov't                                                      |
| myh14  | mylk    | <a href="http://www.ncbi.nlm.nih.gov/entrez/query.fcgi?cmd=Retrieve&amp;db=pubmed&amp;dopt=Abstract&amp;list_uids=22266905">http://www.ncbi.nlm.nih.gov/entrez/query.fcgi?cmd=Retrieve&amp;db=pubmed&amp;dopt=Abstract&amp;list_uids=22266905</a>  6 J Cell Sci 125 Pt 1 Jan 2012 Journal Article,Research Support, Non-U.S. Gov't                                                      |
| pip    | exoc7   | <a href="http://www.ncbi.nlm.nih.gov/entrez/query.fcgi?cmd=Retrieve&amp;db=pubmed&amp;dopt=Abstract&amp;list_uids=22264730">http://www.ncbi.nlm.nih.gov/entrez/query.fcgi?cmd=Retrieve&amp;db=pubmed&amp;dopt=Abstract&amp;list_uids=22264730</a>  6 Dev Cell 22 1 Jan 2012 Journal Article,Research Support, N.I.H., Extramural,Research Support, Non-U.S. Gov't                       |
| mbp    | actin   | <a href="http://www.ncbi.nlm.nih.gov/entrez/query.fcgi?cmd=Retrieve&amp;db=pubmed&amp;dopt=Abstract&amp;list_uids=22249765">http://www.ncbi.nlm.nih.gov/entrez/query.fcgi?cmd=Retrieve&amp;db=pubmed&amp;dopt=Abstract&amp;list_uids=22249765</a>  6 Neurochem Res 37 6 Jun 2012 Journal Article,Research Support, Non-U.S. Gov't                                                       |
| mbp    | tjp1    | <a href="http://www.ncbi.nlm.nih.gov/entrez/query.fcgi?cmd=Retrieve&amp;db=pubmed&amp;dopt=Abstract&amp;list_uids=22249765">http://www.ncbi.nlm.nih.gov/entrez/query.fcgi?cmd=Retrieve&amp;db=pubmed&amp;dopt=Abstract&amp;list_uids=22249765</a>  6 Neurochem Res 37 6 Jun 2012 Journal Article,Research Support, Non-U.S. Gov't                                                       |
| actin  | tjp1    | <a href="http://www.ncbi.nlm.nih.gov/entrez/query.fcgi?cmd=Retrieve&amp;db=pubmed&amp;dopt=Abstract&amp;list_uids=22249765">http://www.ncbi.nlm.nih.gov/entrez/query.fcgi?cmd=Retrieve&amp;db=pubmed&amp;dopt=Abstract&amp;list_uids=22249765</a>  6 Neurochem Res 37 6 Jun 2012 Journal Article,Research Support, Non-U.S. Gov't                                                       |
| actin  | mlc1    | <a href="http://www.ncbi.nlm.nih.gov/entrez/query.fcgi?cmd=Retrieve&amp;db=pubmed&amp;dopt=Abstract&amp;list_uids=22237407">http://www.ncbi.nlm.nih.gov/entrez/query.fcgi?cmd=Retrieve&amp;db=pubmed&amp;dopt=Abstract&amp;list_uids=22237407</a>  6 Am J Physiol Cell Physiol 302 7 Apr 2012 Journal Article,Research Support, N.I.H., Extramural,Research Support, N.I.H., Intramural |
| ranbp9 | app     | <a href="http://www.ncbi.nlm.nih.gov/entrez/query.fcgi?cmd=Retrieve&amp;db=pubmed&amp;dopt=Abstract&amp;list_uids=22223749">http://www.ncbi.nlm.nih.gov/entrez/query.fcgi?cmd=Retrieve&amp;db=pubmed&amp;dopt=Abstract&amp;list_uids=22223749</a>  6 FASEB J 26 4 Apr 2012 Journal Article,Research Support, N.I.H., Extramural,Research Support, Non-U.S. Gov't                        |
| ranbp9 | bace1   | <a href="http://www.ncbi.nlm.nih.gov/entrez/query.fcgi?cmd=Retrieve&amp;db=pubmed&amp;dopt=Abstract&amp;list_uids=22223749">http://www.ncbi.nlm.nih.gov/entrez/query.fcgi?cmd=Retrieve&amp;db=pubmed&amp;dopt=Abstract&amp;list_uids=22223749</a>  6 FASEB J 26 4 Apr 2012 Journal Article,Research Support, N.I.H., Extramural,Research Support, Non-U.S. Gov't                        |
| ranbp9 | rpsa    | <a href="http://www.ncbi.nlm.nih.gov/entrez/query.fcgi?cmd=Retrieve&amp;db=pubmed&amp;dopt=Abstract&amp;list_uids=22223749">http://www.ncbi.nlm.nih.gov/entrez/query.fcgi?cmd=Retrieve&amp;db=pubmed&amp;dopt=Abstract&amp;list_uids=22223749</a>  6 FASEB J 26 4 Apr 2012 Journal Article,Research Support, N.I.H., Extramural,Research Support, Non-U.S. Gov't                        |
| app    | bace1   | <a href="http://www.ncbi.nlm.nih.gov/entrez/query.fcgi?cmd=Retrieve&amp;db=pubmed&amp;dopt=Abstract&amp;list_uids=22223749">http://www.ncbi.nlm.nih.gov/entrez/query.fcgi?cmd=Retrieve&amp;db=pubmed&amp;dopt=Abstract&amp;list_uids=22223749</a>  6 FASEB J 26 4 Apr 2012 Journal Article,Research Support, N.I.H., Extramural,Research Support, Non-U.S. Gov't                        |
| app    | rpsa    | <a href="http://www.ncbi.nlm.nih.gov/entrez/query.fcgi?cmd=Retrieve&amp;db=pubmed&amp;dopt=Abstract&amp;list_uids=22223749">http://www.ncbi.nlm.nih.gov/entrez/query.fcgi?cmd=Retrieve&amp;db=pubmed&amp;dopt=Abstract&amp;list_uids=22223749</a>  6 FASEB J 26 4 Apr 2012 Journal Article,Research Support, N.I.H., Extramural,Research Support, Non-U.S. Gov't                        |
| bace1  | rpsa    | <a href="http://www.ncbi.nlm.nih.gov/entrez/query.fcgi?cmd=Retrieve&amp;db=pubmed&amp;dopt=Abstract&amp;list_uids=22223749">http://www.ncbi.nlm.nih.gov/entrez/query.fcgi?cmd=Retrieve&amp;db=pubmed&amp;dopt=Abstract&amp;list_uids=22223749</a>  6 FASEB J 26 4 Apr 2012 Journal Article,Research Support, N.I.H., Extramural,Research Support, Non-U.S. Gov't                        |
| wnt5a  | tnfsf13 | <a href="http://www.ncbi.nlm.nih.gov/entrez/query.fcgi?cmd=Retrieve&amp;db=pubmed&amp;dopt=Abstract&amp;list_uids=22218904">http://www.ncbi.nlm.nih.gov/entrez/query.fcgi?cmd=Retrieve&amp;db=pubmed&amp;dopt=Abstract&amp;list_uids=22218904</a>  6 Methods Mol Biol 839   2012 Journal Article,Research Support, Non-U.S. Gov't                                                       |

### List of invadopodia-associated proteins identified using GLAD4U

| Rank | Gene ID | Gene symbol | Specie       | Score    |
|------|---------|-------------|--------------|----------|
| 1    | 2017    | cttn        | Homo sapiens | 40.23392 |
| 2    | 9644    | sh3pxd2a    | Homo sapiens | 36.58909 |
| 3    | 285590  | sh3pxd2b    | Homo sapiens | 25.29619 |
| 4    | 50807   | asap1       | Homo sapiens | 17.6154  |
| 5    | 6714    | src         | Homo sapiens | 14.65431 |
| 6    | 4323    | mmp14       | Homo sapiens | 13.44519 |
| 7    | 7454    | was         | Homo sapiens | 10.61229 |
| 8    | 2191    | fap         | Homo sapiens | 8.895094 |
| 9    | 8871    | synj2       | Homo sapiens | 8.603794 |
| 10   | 7456    | wipf1       | Homo sapiens | 7.730623 |
| 11   | 4318    | mmp9        | Homo sapiens | 7.723941 |
| 12   | 6548    | slc9a1      | Homo sapiens | 7.306912 |
| 13   | 23022   | palld       | Homo sapiens | 7.204015 |
| 14   | 5829    | pxn         | Homo sapiens | 6.450688 |
| 15   | 10749   | kif1c       | Homo sapiens | 6.352221 |
| 16   | 8976    | wasl        | Homo sapiens | 6.349799 |
| 17   | 10811   | noxal       | Homo sapiens | 6.259372 |
| 18   | 30011   | sh3kbp1     | Homo sapiens | 6.18967  |
| 19   | 998     | cdc42       | Homo sapiens | 5.156586 |
| 20   | 134265  | afap1l1     | Homo sapiens | 4.921854 |
| 21   | 10642   | igf2bp1     | Homo sapiens | 4.547113 |
| 22   | 5747    | ptk2        | Homo sapiens | 4.485162 |
| 23   | 1759    | dnm1        | Homo sapiens | 4.181252 |
| 24   | 6624    | fscn1       | Homo sapiens | 4.155068 |
| 25   | 1839    | hbegf       | Homo sapiens | 4.039629 |
| 26   | 55763   | exoc1       | Homo sapiens | 4.032285 |
| 27   | 8038    | adam12      | Homo sapiens | 4.008513 |
| 28   | 90102   | phldb2      | Homo sapiens | 3.939549 |

|    |       |         |              |          |
|----|-------|---------|--------------|----------|
| 29 | 8853  | asap2   | Homo sapiens | 3.910733 |
| 30 | 1445  | csk     | Homo sapiens | 3.697452 |
| 31 | 23048 | fnbp1   | Homo sapiens | 3.665857 |
| 32 | 2245  | fgd1    | Homo sapiens | 3.644816 |
| 33 | 9051  | pstpip1 | Homo sapiens | 3.62428  |
| 34 | 10810 | wasf3   | Homo sapiens | 3.604225 |
| 35 | 9322  | trip10  | Homo sapiens | 3.546736 |
| 36 | 867   | cbl     | Homo sapiens | 3.537081 |
| 37 | 6840  | svil    | Homo sapiens | 3.510451 |
| 38 | 60412 | exoc4   | Homo sapiens | 3.410022 |
| 39 | 64866 | cdcp1   | Homo sapiens | 3.363921 |
| 40 | 25    | abl1    | Homo sapiens | 3.290002 |
| 41 | 3936  | lcp1    | Homo sapiens | 3.23894  |
| 42 | 387   | rhoa    | Homo sapiens | 3.201915 |
| 43 | 800   | cald1   | Homo sapiens | 3.176709 |
| 44 | 6845  | vamp7   | Homo sapiens | 3.176709 |
| 45 | 1803  | dpp4    | Homo sapiens | 3.110556 |
| 46 | 10163 | wasf2   | Homo sapiens | 3.013505 |
| 47 | 27    | abl2    | Homo sapiens | 3.013505 |
| 48 | 8773  | snap23  | Homo sapiens | 2.993946 |
| 49 | 5879  | rac1    | Homo sapiens | 2.915688 |
| 50 | 7430  | ezr     | Homo sapiens | 2.892122 |
| 51 | 85360 | syde1   | Homo sapiens | 2.809182 |
| 52 | 3690  | itgb3   | Homo sapiens | 2.756912 |
| 53 | 868   | cblb    | Homo sapiens | 2.752045 |
| 54 | 3688  | itgb1   | Homo sapiens | 2.673773 |
| 55 | 3685  | itgav   | Homo sapiens | 2.649293 |
| 56 | 10643 | igf2bp3 | Homo sapiens | 2.530753 |
| 57 | 10630 | pdpn    | Homo sapiens | 2.508854 |
| 58 | 89782 | lmln    | Homo sapiens | 2.508487 |

|    |        |          |              |          |
|----|--------|----------|--------------|----------|
| 59 | 7414   | vcl      | Homo sapiens | 2.492805 |
| 60 | 27035  | nox1     | Homo sapiens | 2.492805 |
| 61 | 90378  | samd1    | Homo sapiens | 2.441653 |
| 62 | 57648  | kiaa1522 | Homo sapiens | 2.441653 |
| 63 | 1785   | dnm2     | Homo sapiens | 2.397854 |
| 64 | 4478   | msn      | Homo sapiens | 2.397854 |
| 65 | 64147  | kif9     | Homo sapiens | 2.383773 |
| 66 | 382    | arf6     | Homo sapiens | 2.360953 |
| 67 | 2934   | gsn      | Homo sapiens | 2.312799 |
| 68 | 3567   | il5      | Homo sapiens | 2.295972 |
| 69 | 51411  | bin2     | Homo sapiens | 2.287086 |
| 70 | 3055   | hck      | Homo sapiens | 2.259345 |
| 71 | 57513  | caskin2  | Homo sapiens | 2.245805 |
| 72 | 54873  | palmd    | Homo sapiens | 2.208129 |
| 73 | 79649  | map7d3   | Homo sapiens | 2.173478 |
| 74 | 10013  | hdac6    | Homo sapiens | 2.148037 |
| 75 | 10966  | rab40b   | Homo sapiens | 2.141406 |
| 76 | 644815 | fam83g   | Homo sapiens | 2.141406 |
| 77 | 79038  | zfyve21  | Homo sapiens | 2.141406 |
| 78 | 22902  | rufy3    | Homo sapiens | 2.141406 |
| 79 | 4322   | mmp13    | Homo sapiens | 2.137711 |
| 80 | 7474   | wnt5a    | Homo sapiens | 2.134298 |
| 81 | 79073  | tnmem109 | Homo sapiens | 2.111554 |
| 82 | 9936   | cd302    | Homo sapiens | 2.083637 |
| 83 | 151011 | 42623    | Homo sapiens | 2.083637 |
| 84 | 55616  | asap3    | Homo sapiens | 2.083637 |
| 85 | 221496 | lemd2    | Homo sapiens | 2.05742  |
| 86 | 26145  | irf2bp1  | Homo sapiens | 2.05742  |
| 87 | 10634  | gas2l1   | Homo sapiens | 2.05742  |
| 88 | 91748  | elmsan1  | Homo sapiens | 2.032708 |

|    |       |         |              |          |
|----|-------|---------|--------------|----------|
| 89 | 51133 | kctd3   | Homo sapiens | 2.032708 |
| 90 | 93343 | mvb12a  | Homo sapiens | 2.032708 |
| 91 | 65979 | phactr4 | Homo sapiens | 2.032708 |
| 92 | 92799 | shkbp1  | Homo sapiens | 2.009339 |
| 93 | 11173 | adamts7 | Homo sapiens | 2.009339 |
