# Supplementary material for: Hepatitis C Virus Enhances the Invasiveness of Hepatocellular Carcinoma via EGFR-Mediated Invadopodia Formation and Activation
Source: MDPI journal article supplement (doi:10.3390/cells8111395), 2019-11-05
Supplement: s1 [file s1]

**Supplementary Table 4. Classification of overexpressed invadopodia-related genes.**

**Invadopodia - related genes classified by manual curation from GeneCards and UniProt**

| Gene                   | mRNA logFC | mRNA adj.p.value | Description                                                                 | Classification               | Comments                                              |
|------------------------|------------|------------------|-----------------------------------------------------------------------------|------------------------------|-------------------------------------------------------|
| <a href="#">PDGFB</a>  | 2.17       | 3.5E-72          | Platelet Derived Growth Factor Subunit B                                    | Growth factor                |                                                       |
| <a href="#">ICAM1</a>  | 1.91       | 2.1E-304         | Intercellular Adhesion Molecule 1                                           | Cell-cell adhesion           | Leukocyte transendothelial migration, integrin ligand |
| <a href="#">CSF1</a>   | 1.52       | 5.6E-168         | Colony Stimulating Factor 1                                                 | Growth factors and cytokines | Signals to macrophages                                |
| <a href="#">NRG1</a>   | 1.24       | 6.0E-07          | Neuregulin 1                                                                | Growth factors and cytokines | Ligand of ERBB3, ERBB4; cell-cell interaction         |
| <a href="#">SVIL</a>   | 1.12       | 2.0E-28          | Supervillin                                                                 | Actin remodeling             | Links between actin-membrane                          |
| <a href="#">HBEGF</a>  | 1.04       | 2.5E-24          | Heparin Binding EGF Like Growth Factor                                      | Growth factors and cytokines | Promotes smooth muscle and fibroblast proliferation   |
| <a href="#">S100P</a>  | 0.97       | 6.9E-33          | S100 Calcium Binding Protein P                                              | Cell cycle                   | Calcium binding protein                               |
| <a href="#">SLC9A1</a> | 0.91       | 1.2E-54          | Solute Carrier Family 9 Member A1                                           | Ion transporter              | also known as NHE1; pH regulation                     |
| <a href="#">FAM83G</a> | 0.91       | 2.0E-92          | Family With Sequence Similarity 83 Member G                                 | Signal transduction          | BMP signaling pathway                                 |
| <a href="#">GRASP</a>  | 0.90       | 1.8E-07          | GRP1 (General Receptor For Phosphoinositides 1)-Associated Scaffold Protein | Signal transduction          | Adaptor protein; neuronal                             |
| <a href="#">MUC1</a>   | 0.88       | 1.3E-02          | Mucin 1, Cell Surface Associated                                            | Signal transduction          | Mucin; adhesion                                       |
| <a href="#">JAK2</a>   | 0.83       | 1.5E-08          | Janus Kinase 2                                                              | Signal transduction          | NRTK; cytokine receptor signaling                     |
| <a href="#">JUN</a>    | 0.78       | 1.3E-55          | Jun Proto-Oncogene                                                          | Transcription                | Transcription factor; triggers proliferation genes    |
| <a href="#">FOXO3</a>  | 0.78       | 2.2E-52          | Forkhead Box O3                                                             | Transcription                | Transcription factor; triggers apoptosis genes        |
| <a href="#">CDKN1A</a> | 0.73       | 1.6E-04          | Cyclin-Dependent Kinase                                                     | Cell cycle                   | CDK inhibitor                                         |

|                          |      |         |                                                      |                              |                                                                                        |
|--------------------------|------|---------|------------------------------------------------------|------------------------------|----------------------------------------------------------------------------------------|
|                          |      |         | Inhibitor 1A                                         |                              |                                                                                        |
| <a href="#">BCAR1</a>    | 0.72 | 1.9E-35 | BCAR1, Cas Family Scaffolding Protein                | Cytoskeletal signaling       | p130Cas; adaptor protein; Src substrate, cytoskeleton                                  |
| <a href="#">RHOU</a>     | 0.67 | 1.3E-47 | Ras Homolog Family Member U                          | Cytoskeletal signaling       | Small G protein                                                                        |
| <a href="#">STAT5A</a>   | 0.63 | 6.1E-09 | Signal Transducer And Activator Of Transcription 5A  | Transcription                | Transcription factor; cytokine signaling                                               |
| <a href="#">CAV1</a>     | 0.59 | 2.0E-14 | Caveolin 1                                           | Vesicular transport          | Receptor-independent endocytosis                                                       |
| <a href="#">SYNJ2</a>    | 0.59 | 1.5E-57 | Synaptojanin 2                                       | Signal transduction          | Inositol 5-phosphatase; membrane trafficking                                           |
| <a href="#">VEGFA</a>    | 0.58 | 2.0E-50 | Vascular Endothelial Growth Factor A                 | Growth factor                | Angiogenesis                                                                           |
| <a href="#">TGM2</a>     | 0.51 | 1.4E-28 | Transglutaminase 2                                   | Metabolism                   | Induces resistance to proteolytic cleavage                                             |
| <a href="#">DNM1</a>     | 0.45 | 1.9E-04 | Dynamin 1                                            | Cytoskeletal signaling       | GTP-binding protein; receptor mediated endocytosis; microtubule binding and regulation |
| <a href="#">SMAD3</a>    | 0.41 | 1.6E-21 | SMAD Family Member 3                                 | Transcription                | Transcription factor; activated by TGFb signaling pathway                              |
| <a href="#">RHOQ</a>     | 0.40 | 4.6E-11 | Ras Homolog Family Member Q                          | Cytoskeletal signaling       | Small G protein; epithelial cell polarization; filopodia formation                     |
| <a href="#">VCL</a>      | 0.39 | 7.3E-25 | Vinculin                                             | Cytoskeletal signaling       | Cell migration; actin binding                                                          |
| <a href="#">CREB1</a>    | 0.38 | 7.3E-06 | CAMP Responsive Element Binding Protein 1            | Transcription                | Activated by hormonal stimulation of cAMP pathway                                      |
| <a href="#">BRAP</a>     | 0.36 | 5.2E-07 | BRCA1 Associated Protein                             | Signal transduction          | Negative regulation of Ras-MAPK pathway; cytoplasmic retention regulation              |
| <a href="#">EPS8</a>     | 0.33 | 2.0E-17 | Epidermal Growth Factor Receptor Pathway Substrate 8 | Cytoskeletal signaling       | actin remodeling; filopodia                                                            |
| <a href="#">BMP1</a>     | 0.32 | 6.0E-07 | Bone Morphogenetic Protein 1                         | Growth factors and cytokines | Involved in cartilage and bone formation; cleaves pro-collagen; peptidase              |
| <a href="#">KIAA1522</a> | 0.32 | 3.7E-09 | KIAA1522                                             | Unknown                      | Mutated in cancer; prognostic marker                                                   |
| <a href="#">CASKIN2</a>  | 0.30 | 3.4E-06 | CASK Interacting Protein 2                           | Signal transduction          |                                                                                        |
| <a href="#">RHOC</a>     | 0.30 | 2.7E-05 | Ras Homolog Family Member C                          | Cytoskeletal signaling       | Small G protein; overexpressed in cancer                                               |
| <a href="#">MMP14</a>    | 0.28 | 1.0E-08 | Matrix Metallopeptidase 14                           | Matrix metalloproteinase     | Membranal MMP; activates MMP2; endopeptidase                                           |

|                          |      |         |                                                        |                        |                                                                                                        |
|--------------------------|------|---------|--------------------------------------------------------|------------------------|--------------------------------------------------------------------------------------------------------|
| <a href="#">PTPN11</a>   | 0.27 | 2.5E-08 | Protein Tyrosine Phosphatase, Non-Receptor Type 11     | Signal transduction    | Shp2; tyrosine phosphatase                                                                             |
| <a href="#">MAPK7</a>    | 0.26 | 5.1E-04 | Mitogen-Activated Protein Kinase 7                     | Signal transduction    | Proliferation, differentiation and cell survival signaling                                             |
| <a href="#">FERMT2</a>   | 0.24 | 2.6E-04 | Fermitin Family Member 2                               | Cytoskeletal signaling | Mediates integrin signaling                                                                            |
| <a href="#">KIF5B</a>    | 0.23 | 2.8E-05 | Kinesin Family Member 5B                               | Motor protein          | Microtubule-dependent motor required for normal distribution of mitochondria and lysosomes             |
| <a href="#">CDK5RAP1</a> | 0.23 | 4.9E-06 | CDK5 Regulatory Subunit Associated Protein 1           | Cell cycle             | Regulator of cyclin-dependent kinase 5 activity                                                        |
| <a href="#">PXN</a>      | 0.22 | 3.0E-05 | Paxillin                                               | Cytoskeletal signaling | Cell migration; focal adhesions                                                                        |
| <a href="#">ARF6</a>     | 0.21 | 1.0E-05 | ADP Ribosylation Factor 6                              | Vesicular transport    | Small G protein                                                                                        |
| <a href="#">ROCK1</a>    | 0.20 | 1.5E-03 | Rho Associated Coiled-Coil Containing Protein Kinase 1 | Cytoskeletal signaling | Serine/threonine kinase of Rho                                                                         |
| <a href="#">TRIP10</a>   | 0.19 | 1.6E-02 | Thyroid Hormone Receptor Interactor 10                 | Vesicular transport    | Regulation of actin reorganization in endocytosis and tubulation                                       |
| <a href="#">RUFY3</a>    | 0.18 | 1.2E-02 | RUN And FYVE Domain Containing 3                       | Actin remodeling       | Axon formation and development; regulates F-actin-enriched protrusive structures at the cell periphery |
| <a href="#">SOS1</a>     | 0.17 | 8.0E-03 | SOS Ras/Rac Guanine Nucleotide Exchange Factor 1       | Signal transduction    | Ras GEF                                                                                                |
| <a href="#">TJP1</a>     | 0.16 | 4.3E-03 | Tight Junction Protein 1                               | Cell-cell adhesion     | Cell-cell junctions                                                                                    |
| <a href="#">ACTN4</a>    | 0.16 | 4.9E-05 | Actinin Alpha 4                                        | Actin remodeling       | Cytoskeletal scaffold protein                                                                          |
| <a href="#">LASP1</a>    | 0.15 | 2.7E-04 | LIM And SH3 Protein 1                                  | Actin remodeling       | Regulation of dynamic actin-based, cytoskeletal activities; actin-membrane connection                  |
| <a href="#">ABL1</a>     | 0.15 | 3.8E-03 | ABL Proto-Oncogene 1, Non-Receptor Tyrosine Kinase     | Cytoskeletal signaling | NRTK                                                                                                   |
| <a href="#">PTGER4</a>   | 0.14 | 4.0E-02 | Prostaglandin E Receptor 4                             | Metabolism             | GPCR; receptor for prostaglandin E2 (PGE2)                                                             |
| <a href="#">SRC</a>      | 0.14 | 3.1E-02 | SRC Proto-Oncogene, Non-Receptor Tyrosine Kinase       | Signal transduction    | NRTK                                                                                                   |
| <a href="#">BRAF</a>     | 0.13 | 3.6E-02 | B-Raf Proto-Oncogene, Serine/Threonine Kinase          | Signal transduction    | Serine/threonine kinase, MAPK pathway; proliferation and differentiation                               |
| <a href="#">TP53</a>     | 0.13 | 5.7E-03 | Tumor Protein P53                                      | Cell cycle             | Tumor suppressor; induces growth arrest                                                                |

|                         |      |         |                                                          |                                      |                                                                         |
|-------------------------|------|---------|----------------------------------------------------------|--------------------------------------|-------------------------------------------------------------------------|
|                         |      |         |                                                          |                                      | or apoptosis depending on the physiological circumstances and cell type |
| <a href="#">CDKN1B</a>  | 0.12 | 1.2E-02 | Cyclin-Dependent Kinase Inhibitor 1B                     | Cell cycle                           | Cyclin-dependent kinase inhibitor                                       |
| <a href="#">ADAMTS1</a> | 0.12 | 3.3E-02 | ADAM Metallopeptidase With Thrombospondin Type 1 Motif 1 | Matrix metalloproteinase             |                                                                         |
| <a href="#">SNX9</a>    | 0.09 | 4.9E-02 | Sorting Nexin 9                                          | Vesicular transport/actin remodeling | Works with dynamin 1 among others                                       |
