# Supplementary material for: Hepatitis C Virus Enhances the Invasiveness of Hepatocellular Carcinoma via EGFR-Mediated Invadopodia Formation and Activation
Source: MDPI journal article supplement (doi:10.3390/cells8111395), 2019-11-05
Supplement: s1 [file s1]

**Supplementary Table 5. Receptor-ligand correlation.**

| RTKs<br>activated in<br>PamGene          | Official<br>gene name | Comments                                                         | Receptor<br>overexpressed/<br>downregulated<br>in mRNAseq? | Receptor<br>involved in<br>invasion/<br>invadopodia? | Ligands                     | Ligand<br>overexpressed/<br>downregulated<br>in mRNAseq? | Ligand<br>involved in<br>invasion/<br>invadopodia? |
|------------------------------------------|-----------------------|------------------------------------------------------------------|------------------------------------------------------------|------------------------------------------------------|-----------------------------|----------------------------------------------------------|----------------------------------------------------|
| <a href="#">AXL</a>                      | AXL                   | Also acts as a receptor<br>for several viruses                   |                                                            | Yes (invasion)                                       | GAS6                        |                                                          |                                                    |
| <a href="#">CCK4<br/>(PTK7)</a>          | PTK7                  | Inactive tyrosine kinase<br>involved in Wnt<br>signaling pathway |                                                            |                                                      | ??                          |                                                          |                                                    |
| <a href="#">FMS</a>                      | CSF1R                 | Colony stimulating factor<br>1 receptor                          |                                                            |                                                      | CSF1, IL34                  | Overexpressed                                            |                                                    |
| <a href="#">KIT</a>                      | KIT                   | SCFR                                                             |                                                            |                                                      | KITLG/SCF                   |                                                          |                                                    |
| <a href="#">LMR2<br/>(KIAA1079<br/>)</a> | LMTK2                 | Serine/threonine/tyrosine<br>kinase receptor                     |                                                            |                                                      | ??                          |                                                          |                                                    |
| <a href="#">MER</a>                      | MERTK                 | ECM receptor                                                     | Downregulated                                              |                                                      | LGALS3, TUB,<br>TULP1, GAS6 | Overexpressed                                            | Yes<br>(invasion)                                  |
| <a href="#">MET</a>                      | MET                   | HGF receptor                                                     |                                                            | Yes (invasion)                                       | HGF, VEGFA                  | Overexpressed                                            | Yes<br>(invasion)                                  |
| <a href="#">PDGFRB</a>                   | PDGFRB                |                                                                  |                                                            |                                                      | PDGFA,<br>PDGFB,<br>PDGFD   | Overexpressed                                            |                                                    |
| <a href="#">RET</a>                      | RET                   |                                                                  |                                                            |                                                      | GDNF                        | Overexpressed                                            |                                                    |
| <a href="#">RON</a>                      | MST1R                 | MST1R, macrophage<br>stimulating receptor,<br>ECM receptor       |                                                            |                                                      | MST1                        |                                                          |                                                    |

|                       |       |                                                                                                                          |               |                |                                                                    |                                 |  |
|-----------------------|-------|--------------------------------------------------------------------------------------------------------------------------|---------------|----------------|--------------------------------------------------------------------|---------------------------------|--|
| <a href="#">ROS1</a>  | ROS1  |                                                                                                                          |               |                | Orphan receptor<br>(no ligand)                                     |                                 |  |
| <a href="#">RYK</a>   | RYK   | Neuronal receptor,<br>co-receptor with FZD8<br>for WNTs                                                                  |               |                | WNT1, WNT3,<br>WNT3A,<br>WNT5A                                     |                                 |  |
| <a href="#">TNK1</a>  | TNK1  | Negative regulation of<br>cell growth by down<br>regulation of Ras-MAPK<br>pathway                                       |               |                | ??                                                                 |                                 |  |
| <a href="#">TYRO3</a> | TYRO3 | ECM receptor, acts as a<br>receptor for several<br>viruses                                                               | Downregulated |                | TULP1, GAS6                                                        |                                 |  |
| <a href="#">ROR1</a>  | ROR1  | RTK-like orphan<br>receptor (no known<br>ligand)                                                                         | Downregulated |                | WNT5A<br>(GeneCards)                                               |                                 |  |
| <a href="#">ROR2</a>  | ROR2  | RTK-like orphan<br>receptor (no known<br>ligand)                                                                         |               |                | WNT5A<br>(GeneCards)                                               |                                 |  |
| <a href="#">DDR1</a>  | DDR1  | Collagen receptor,<br>regulates ECM<br>remodelling by up-<br>regulation of MMP2,<br>MMP7, MMP9<br>(facilitates invasion) |               | Yes (invasion) | <b>COL2A1</b> ,<br>COL3A1,<br>COL4A1,<br>COL5A1<br>(STRING)        | Downregulated                   |  |
| <a href="#">DDR2</a>  | DDR2  | collagen receptor,<br>regulates ECM<br>remodelling by up-<br>regulation of MMP1,<br>MMP2, MMP13                          |               | Yes (invasion) | <b>COL1A1</b> ,<br><b>COL2A1</b> ,<br>COL3A1,<br>COL4A1,<br>COL5A1 | Downregulated/<br>overexpressed |  |

|                        |        |                                                               |               |                |                                                           |               |  |
|------------------------|--------|---------------------------------------------------------------|---------------|----------------|-----------------------------------------------------------|---------------|--|
|                        |        | (facilitates invasion)                                        |               |                | (STRING)                                                  |               |  |
| <a href="#">EPHA1</a>  | EPHA1  | Ephrin receptor family, neuronal/cancer, juxtacrine signaling |               |                | EFNA1, EFNA3, <b>EFNA4</b> (Uniprot)                      | Downregulated |  |
| <a href="#">EPHA10</a> | EPHA10 | Ephrin receptor family, neuronal/cancer, juxtacrine signaling |               |                | EFNB1, EFNB2 (STRING via GeneCards)                       |               |  |
| <a href="#">EPHA2</a>  | EPHA2  | Ephrin receptor family, neuronal/cancer, juxtacrine signaling |               | Yes (invasion) | EFNA1, EFNA2, <b>EFNA5</b>                                | Downregulated |  |
| <a href="#">EPHA3</a>  | EPHA3  | Ephrin receptor family, neuronal/cancer, juxtacrine signaling |               |                | <b>EFNA5</b> , EFNA1 (Uniprot)                            | Downregulated |  |
| <a href="#">EPHA4</a>  | EPHA4  | Ephrin receptor family, neuronal/cancer, juxtacrine signaling |               |                | EFNA1, EFNB3 (Uniprot)                                    |               |  |
| <a href="#">EPHA5</a>  | EPHA5  | Ephrin receptor family, neuronal/cancer, juxtacrine signaling |               |                | <b>EFNA5</b> , EFNA1, <b>EFNA4</b> (STRING via GeneCards) | Downregulated |  |
| <a href="#">EPHA6</a>  | EPHA6  | Ephrin receptor family, neuronal/cancer, juxtacrine signaling | Overexpressed |                | <b>EFNA5</b> (BioGrid), EFNA1 (STRING via GeneCards)      | Downregulated |  |
| <a href="#">EPHA7</a>  | EPHA7  | Ephrin receptor family, neuronal/cancer, juxtacrine signaling |               |                | <b>EFNA5</b> (Uniprot), EFNA1, <b>EFNA4</b> (STRING via   | Downregulated |  |

|                       |       |                                                               |               |                |                                                                           |               |                |
|-----------------------|-------|---------------------------------------------------------------|---------------|----------------|---------------------------------------------------------------------------|---------------|----------------|
|                       |       |                                                               |               |                | GeneCards)                                                                |               |                |
| <a href="#">EPHA8</a> | EPHA8 | Ephrin receptor family, neuronal/cancer, juxtacrine signaling |               |                | EFNA2, EFNA3, <b>EFNA5</b> (Uniprot)                                      | Downregulated |                |
| <a href="#">EPHB1</a> | EPHB1 | Ephrin receptor family, neuronal/cancer, juxtacrine signaling |               |                | EFNB1, EFNB2, EFNB3 (Uniprot)                                             |               |                |
| <a href="#">EPHB2</a> | EPHB2 | Ephrin receptor family, neuronal/cancer, juxtacrine signaling |               | Yes (invasion) | EFNB1, EFNB2 (Uniprot)                                                    |               |                |
| <a href="#">EPHB3</a> | EPHB3 | Ephrin receptor family, neuronal/cancer, juxtacrine signaling | Downregulated |                | EFNB2 (Uniprot), EFNB3 (STRING via GeneCards)                             |               |                |
| <a href="#">EPHB4</a> | EPHB4 | Ephrin receptor family, neuronal/cancer, juxtacrine signaling | Downregulated | Yes (invasion) | EFNB2 (Uniprot)                                                           |               |                |
| <a href="#">EGFR</a>  | EGFR  | EGFR family                                                   |               | Yes (invasion) | EGF, TGFA, amphiregulin (AREG), EPGN, <b>BTC</b> , EREG, <b>HBEGF</b>     | Overexpressed | Yes (invasion) |
| <a href="#">ERBB2</a> | ERBB2 | EGFR family                                                   |               | Yes (invasion) | No ligand, <b>HB-EGF</b> can bind to heterodimer of ErbB2 with other Erbs | Overexpressed | Yes (invasion) |
| <a href="#">ERBB3</a> | ERBB3 | EGFR family                                                   | Downregulated | Yes (invasion) | <b>NRG1</b> , CSPG5                                                       | Overexpressed |                |

|                       |       |                         |               |                |                                                            |                             |                |
|-----------------------|-------|-------------------------|---------------|----------------|------------------------------------------------------------|-----------------------------|----------------|
| <a href="#">ERBB4</a> | ERBB4 | EGFR family             |               |                | NRG1, NRG2, NRG3, NRG4, BTC, EREG, HBEGF                   | Overexpressed               | Yes (invasion) |
| <a href="#">FGFR1</a> | FGFR1 | FGFR family             | Downregulated |                | FGF1, FGF2, FGF3, FGF6, FGF7 (STRING via GeneCards)        |                             |                |
| <a href="#">FGFR2</a> | FGFR2 | FGFR family             |               |                | FGF1, FGF3, FGF6, FGF7, FGF8 (STRING via GeneCards)        |                             |                |
| <a href="#">FGFR3</a> | FGFR3 | FGFR family             | Downregulated |                | FGF3, FGF4, FGF5, FGF6, FGF7 (STRING via GeneCards)        |                             |                |
| <a href="#">FGFR4</a> | FGFR4 | FGFR family             | Downregulated |                | FGF19, FGF1, FGF3, FGF4, FGF5, FGF9 (STRING via GeneCards) | Overexpressed               |                |
| <a href="#">FLT1</a>  | FLT1  | VEGFR1 (angiogenesis)   |               |                | VEGFA, VEGFB, PGF                                          | Downregulated/overexpressed | Yes (invasion) |
| <a href="#">FLT3</a>  | FLT3  | Regulates hematopoiesis |               |                | FLT3LG                                                     |                             |                |
| <a href="#">FLT4</a>  | FLT4  | VEGFR3 (angiogenesis)   |               |                | VEGFC, VEGFD                                               |                             |                |
| <a href="#">KDR</a>   | KDR   | VEGFR2 (angiogenesis)   |               | Yes (invasion) | VEGFA, VEGFC, VEGFD, FGF2                                  | Overexpressed               | Yes (invasion) |

|                              |       |                                                                                                                        |               |                |                             |               |  |
|------------------------------|-------|------------------------------------------------------------------------------------------------------------------------|---------------|----------------|-----------------------------|---------------|--|
| <a href="#">ALK</a>          | ALK   | Neuronal receptor, insulin receptor superfamily                                                                        |               |                | PTN, MDK                    | Downregulated |  |
| <a href="#">INSR</a>         | INSR  | Insulin receptor                                                                                                       | Overexpressed |                | Insulin, IGF1, IGF2         | Downregulated |  |
| <a href="#">IGF1R</a>        | IGF1R | Insulin-like growth factor receptor                                                                                    |               | Yes (invasion) | Insulin, IGF1, IGF2         | Downregulated |  |
| <a href="#">IRR (INSRR)</a>  | INSRR | Insulin receptor related receptor, functions as a pH sensing receptor which is activated by increased extracellular pH |               |                | ??<br>Extracellular pH?     |               |  |
| <a href="#">LTK</a>          | LTK   | Leukocyte receptor tyrosine kinase, member of ROS/insulin receptor family, exact function unknown                      |               |                | ??                          |               |  |
| <a href="#">TRKA (NTRK1)</a> | NTRK1 | Neuronal receptor                                                                                                      |               |                | NGF, NTF3/<br>neurotrophin3 |               |  |
| <a href="#">TRKB</a>         | NTRK2 | Neuronal receptor                                                                                                      |               |                | BDNF, NTF4,<br>NTF3         |               |  |
| <a href="#">TRKC</a>         | NTRK3 | Neuronal receptor                                                                                                      |               |                | NTF3, NTF4,<br>BDNF, NGF    |               |  |
