# Supplementary material for: Hepatitis C Virus Enhances the Invasiveness of Hepatocellular Carcinoma via EGFR-Mediated Invadopodia Formation and Activation
Source: MDPI journal article supplement (doi:10.3390/cells8111395), 2019-11-05
Supplement: s1 [file s1]

**Supplementary Table 3. Classification of overexpressed invasion-related genes.**

**Invasion - related genes classified by manual curation from GeneCards and UniProt**

| Gene                  | mRNA logFC | mRNA adj.p.value | Description                                      | Classification        | Comments                                                                                                                       |
|-----------------------|------------|------------------|--------------------------------------------------|-----------------------|--------------------------------------------------------------------------------------------------------------------------------|
| <a href="#">PIGR</a>  | 4.55       | 1.1E-05          | Polymeric Immunoglobulin Receptor                | Cell surface receptor | Member of the immunoglobulin superfamily                                                                                       |
| <a href="#">CXCL5</a> | 3.77       | 0.0E+00          | C-X-C Motif Chemokine Ligand 5                   | Cytokine              | Chemokine; neutrophil recruitment and activation; thought to play a role in cancer cell proliferation, migration, and invasion |
| <a href="#">BIRC7</a> | 3.68       | 2.1E-03          | Baculoviral IAP Repeat Containing 7              | Apoptosis             | Inhibitor of apoptosis                                                                                                         |
| <a href="#">LCN2</a>  | 3.47       | 5.9E-04          | Lipocalin 2                                      | Transporter           |                                                                                                                                |
| <a href="#">IL11</a>  | 3.29       | 2.1E-13          | Interleukin 11                                   | Cytokine              |                                                                                                                                |
| <a href="#">FOSB</a>  | 2.50       | 0.0E+00          | FBJ Murine Osteosarcoma Viral Oncogene Homolog B | Transcription         | Transcription factor                                                                                                           |
| <a href="#">KLF4</a>  | 2.45       | 9.6E-107         | Kruppel-Like Factor 4 (Gut)                      | Transcription         | Transcription factor                                                                                                           |
| <a href="#">JUNB</a>  | 2.23       | 2.9E-272         | Jun B Proto-Oncogene                             | Transcription         | Transcription factor                                                                                                           |
| <a href="#">PDGFB</a> | 2.17       | 3.5E-72          | Platelet Derived Growth Factor Subunit B         | Growth factor         |                                                                                                                                |
| <a href="#">SOCS2</a> | 2.07       | 9.6E-86          | Suppressor Of Cytokine Signaling 2               | Signal transduction   | Cytokine-inducible negative regulators of cytokine receptor signaling                                                          |
| <a href="#">ICAM1</a> | 1.91       | 2.1E-304         | Intercellular Adhesion Molecule 1                | Cell-cell adhesion    | Leukocyte transendothelial migration, integrin ligand                                                                          |
| <a href="#">RELB</a>  | 1.90       | 4.4E-158         | RELB Proto-Oncogene, NF-KB Subunit               | Transcription         |                                                                                                                                |
| <a href="#">FOSL2</a> | 1.81       | 6.3E-225         | FOS Like Antigen 2                               | Transcription         |                                                                                                                                |
| <a href="#">RBM24</a> | 1.62       | 1.9E-18          | RNA Binding Motif Protein 24                     | mRNA regulation       | mRNA stability; myogenic differentiation                                                                                       |

|                         |      |          |                                                   |                               |                                                                                                                      |
|-------------------------|------|----------|---------------------------------------------------|-------------------------------|----------------------------------------------------------------------------------------------------------------------|
| <a href="#">MAP3K14</a> | 1.43 | 9.8E-30  | Mitogen-Activated Protein Kinase Kinase Kinase 14 | Signal transduction           | Cytokine signaling                                                                                                   |
| <a href="#">EGR1</a>    | 1.37 | 1.2E-147 | Early Growth Response 1                           | Transcription                 | Transcription regulation                                                                                             |
| <a href="#">TLR2</a>    | 1.34 | 4.0E-02  | Toll Like Receptor 2                              | Cell surface receptor         | Plays a fundamental role in pathogen recognition and activation of innate immunity                                   |
| <a href="#">GLI1</a>    | 1.27 | 1.4E-07  | GLI Family Zinc Finger 1                          | Transcription                 | Transcription factor                                                                                                 |
| <a href="#">ITGB6</a>   | 1.22 | 5.1E-04  | Integrin Subunit Beta 6                           | Cell adhesion                 |                                                                                                                      |
| <a href="#">BDNF</a>    | 1.10 | 2.6E-02  | Brain-Derived Neurotrophic Factor                 | Growth factor                 | Member of the nerve growth factor family of proteins; neuronal                                                       |
| <a href="#">CYR61</a>   | 1.09 | 4.0E-158 | Cysteine Rich Angiogenic Inducer 61               | Growth factor                 | Promotes cell proliferation, chemotaxis, angiogenesis and cell adhesion; role in wound healing; ligand for integrins |
| <a href="#">HBEGF</a>   | 1.04 | 2.5E-24  | Heparin Binding EGF Like Growth Factor            | Growth factor                 | Promotes smooth muscle and fibroblast proliferation                                                                  |
| <a href="#">ETS2</a>    | 1.03 | 5.0E-114 | ETS Proto-Oncogene 2, Transcription Factor        | Transcription                 | Transcription factor; development and apoptosis genes transcription                                                  |
| <a href="#">S100P</a>   | 0.97 | 6.9E-33  | S100 Calcium Binding Protein P                    | Cell cycle                    | Calcium binding protein                                                                                              |
| <a href="#">VIM</a>     | 0.92 | 2.0E-150 | Vimentin                                          | Cytoskeleton scaffold protein | Intermediate filament                                                                                                |
| <a href="#">SLC9A1</a>  | 0.91 | 1.2E-54  | Solute Carrier Family 9 Member A1                 | Transporter                   | also known as NHE1; pH regulation                                                                                    |
| <a href="#">THBS1</a>   | 0.89 | 1.1E-285 | Thrombospondin 1                                  | Cell adhesion                 | Can bind to fibrinogen, fibronectin, laminin, type V collagen and integrins alpha-V/beta-1                           |
| <a href="#">STC2</a>    | 0.88 | 1.5E-89  | Stanniocalcin 2                                   | Metabolism                    | Secreted protein; calcium and phosphate homeostasis                                                                  |
| <a href="#">MUC1</a>    | 0.88 | 1.3E-02  | Mucin 1, Cell Surface Associated                  | Signal transduction           | Mucin; adhesion                                                                                                      |
| <a href="#">JAK2</a>    | 0.83 | 1.5E-08  | Janus Kinase 2                                    | Signal transduction           | NRTK; cytokine receptor signaling                                                                                    |
| <a href="#">AHR</a>     | 0.83 | 2.2E-57  | Aryl Hydrocarbon Receptor                         | Transcription                 | Ligand-activated transcriptional activator;                                                                          |

|                           |      |          |                                                       |                               |                                                                                                        |
|---------------------------|------|----------|-------------------------------------------------------|-------------------------------|--------------------------------------------------------------------------------------------------------|
| <a href="#">TNFRSF12A</a> | 0.83 | 4.6E-46  | Tumor Necrosis Factor Receptor Superfamily Member 12A | Cell surface receptor         | Apoptosis; angiogenesis and proliferation of endothelial cells; cell adhesion                          |
| <a href="#">ITGB8</a>     | 0.80 | 1.3E-04  | Integrin Subunit Beta 8                               | Cell adhesion                 |                                                                                                        |
| <a href="#">MFI2</a>      | 0.79 | 3.4E-11  | Melanotransferrin                                     | Metabolism                    | Involved in iron cellular uptake                                                                       |
| <a href="#">COL1A1</a>    | 0.79 | 1.3E-02  | Collagen Type I Alpha 1                               | Extracellular matrix protein  | Type I collagen is found in most connective tissues and is abundant in bone, cornea, dermis and tendon |
| <a href="#">JUN</a>       | 0.78 | 1.3E-55  | Jun Proto-Oncogene                                    | Transcription                 | Transcription factor                                                                                   |
| <a href="#">CDKN2B</a>    | 0.78 | 2.3E-63  | Cyclin-Dependent Kinase Inhibitor 2B                  | Cell cycle                    | CDK inhibitor                                                                                          |
| <a href="#">RND3</a>      | 0.77 | 1.0E-49  | Rho Family GTPase 3                                   | Cytoskeletal signaling        | Small G protein                                                                                        |
| <a href="#">SERPINE1</a>  | 0.73 | 2.1E-128 | Serpin Family E Member 1                              | Protease inhibitor            | Inhibitor of fibrinolysis; inhibitor of tissue plasminogen activator (tPA) and urokinase (uPA)         |
| <a href="#">CDKN1A</a>    | 0.73 | 1.6E-04  | Cyclin-Dependent Kinase Inhibitor 1A                  | Cell cycle                    | CDK2, 4 inhibitor; cell cycle inhibitor                                                                |
| <a href="#">BCAR1</a>     | 0.72 | 1.9E-35  | BCAR1, Cas Family Scaffolding Protein                 | Cytoskeletal signaling        | p130Cas; adaptor protein; Src substrate, cytoskeleton                                                  |
| <a href="#">RHOB</a>      | 0.71 | 2.2E-64  | Ras Homolog Family Member B                           | Cytoskeletal signaling        | Small G protein                                                                                        |
| <a href="#">WEE1</a>      | 0.69 | 1.1E-53  | WEE1 G2 Checkpoint Kinase                             | Cell cycle                    | Nuclear serine/threonine kinase                                                                        |
| <a href="#">KLF5</a>      | 0.66 | 5.9E-22  | Kruppel-Like Factor 5 (Intestinal)                    | Transcription                 | Transcriptional activator                                                                              |
| <a href="#">STAT5A</a>    | 0.63 | 6.1E-09  | Signal Transducer And Activator Of Transcription 5A   | Transcription                 | Transcriptional activator; growth factor and cytokine signaling                                        |
| <a href="#">DUSP4</a>     | 0.63 | 1.7E-22  | Dual Specificity Phosphatase 4                        | Signal transduction           | Phosphatase; works in MAPK pathway                                                                     |
| <a href="#">NES</a>       | 0.60 | 2.6E-51  | Nestin                                                | Cytoskeleton scaffold protein | Neuronal intermediate filament family                                                                  |
| <a href="#">CAV1</a>      | 0.59 | 2.0E-14  | Caveolin 1                                            | Vesicular transport           | Receptor-independent endocytosis                                                                       |

|                        |      |         |                                                     |                          |                                                                                                                        |
|------------------------|------|---------|-----------------------------------------------------|--------------------------|------------------------------------------------------------------------------------------------------------------------|
| <a href="#">VEGFA</a>  | 0.58 | 2.0E-50 | Vascular Endothelial Growth Factor A                | Growth factor            | Angiogenesis                                                                                                           |
| <a href="#">ZFP36</a>  | 0.58 | 4.7E-20 | ZFP36 Ring Finger Protein                           | mRNA regulation          | Binds ARE-containing mRNAs and promotes their degradation                                                              |
| <a href="#">SRF</a>    | 0.58 | 3.1E-30 | Serum Response Factor                               | Transcription            | Transcription factor; proliferation and differentiation                                                                |
| <a href="#">MYC</a>    | 0.51 | 4.1E-24 | V-Myc Avian Myelocytomatosis Viral Oncogene Homolog | Transcription            | Transcription factor                                                                                                   |
| <a href="#">RASSF1</a> | 0.50 | 6.5E-16 | Ras Association Domain Family Member 1              | Apoptosis                | Tumor suppressor                                                                                                       |
| <a href="#">SIRT1</a>  | 0.50 | 3.0E-17 | Sirtuin 1                                           | Epigenetic regulation    | NAD-dependent protein deacetylase that links transcriptional regulation directly to intracellular energetics           |
| <a href="#">NFATC2</a> | 0.50 | 8.6E-30 | Nuclear Factor Of Activated T-Cells 2               | Transcription            | Transcription activator; promotes invasive migration through activation of GPC6 expression and WNT5A signaling pathway |
| <a href="#">NUAK1</a>  | 0.49 | 1.1E-28 | NUAK Family Kinase 1                                | Cytoskeletal signaling   |                                                                                                                        |
| <a href="#">TES</a>    | 0.47 | 7.0E-28 | Testin LIM Domain Protein                           | Cytoskeletal signaling   | Scaffold protein                                                                                                       |
| <a href="#">PAK7</a>   | 0.45 | 2.3E-03 | P21 Protein (Cdc42/Rac)-Activated Kinase 7          | Cytoskeletal signaling   | Serine/threonine kinase                                                                                                |
| <a href="#">ENAH</a>   | 0.42 | 6.7E-29 | Enabled Homolog (Drosophila)                        | Cytoskeletal signaling   | Ena/VASP proteins                                                                                                      |
| <a href="#">AKAP13</a> | 0.41 | 1.1E-19 | A-Kinase Anchoring Protein 13                       | Signal transduction      | Adaptor protein                                                                                                        |
| <a href="#">LPAR2</a>  | 0.41 | 2.7E-02 | Lysophosphatidic Acid Receptor 2                    | Signal transduction      |                                                                                                                        |
| <a href="#">SMAD3</a>  | 0.41 | 1.6E-21 | SMAD Family Member 3                                | Transcription            | Transcription factor; activated by TGFb signaling pathway                                                              |
| <a href="#">SHH</a>    | 0.39 | 3.2E-08 | Sonic Hedgehog                                      | Embryonic development    | Embryo patterning                                                                                                      |
| <a href="#">CREB1</a>  | 0.38 | 7.3E-06 | CAMP Responsive Element Binding Protein 1           | Transcription            | Activated by hormonal stimulation of cAMP pathway                                                                      |
| <a href="#">PTP4A3</a> | 0.37 | 4.5E-09 | Protein Tyrosine Phosphatase Type IVA, Member 3     | Signal transduction/cell | Cell proliferation; metastasis                                                                                         |

|                        |      |         |                                                    |                                        |                                                                                              |
|------------------------|------|---------|----------------------------------------------------|----------------------------------------|----------------------------------------------------------------------------------------------|
|                        |      |         |                                                    | cycle                                  |                                                                                              |
| <a href="#">ANXA4</a>  | 0.35 | 3.0E-18 | Annexin A4                                         | Vesicular transport                    |                                                                                              |
| <a href="#">JAK1</a>   | 0.35 | 5.7E-17 | Janus Kinase 1                                     | Signal transduction                    | NRTK; cytokine receptor signaling                                                            |
| <a href="#">CTNND1</a> | 0.35 | 1.0E-37 | Catenin Delta 1                                    | Cell-cell adhesion/signal transduction | Wnt signaling pathway                                                                        |
| <a href="#">GPR160</a> | 0.35 | 1.2E-02 | G Protein-Coupled Receptor 160                     | Cell surface receptor                  |                                                                                              |
| <a href="#">LATS1</a>  | 0.34 | 1.3E-06 | Large Tumor Suppressor Kinase 1                    | Cell cycle                             | Serine/threonine kinase                                                                      |
| <a href="#">SOX9</a>   | 0.34 | 1.3E-13 | SRY-Box 9                                          | Transcription                          | Transcription factor; chondrocyte differentiation; skeletal development                      |
| <a href="#">FMNL2</a>  | 0.32 | 6.9E-08 | Formin Like 2                                      | Actin remodeling                       | Formin-like protein                                                                          |
| <a href="#">BMP1</a>   | 0.32 | 6.0E-07 | Bone Morphogenetic Protein 1                       | Growth factor                          | Involved in cartilage and bone formation; cleaves pro-collagen; peptidase                    |
| <a href="#">CMTM3</a>  | 0.32 | 7.2E-11 | CKLF Like MARVEL Transmembrane Domain Containing 3 | Chemokine                              | Chemokine-like factor; B-cell signaling                                                      |
| <a href="#">SPAG9</a>  | 0.32 | 1.6E-12 | Sperm Associated Antigen 9                         | Signal transduction                    | Scaffold protein                                                                             |
| <a href="#">CIC</a>    | 0.30 | 2.3E-07 | Capicua Transcriptional Repressor                  | Transcription                          | Transcriptional repressor which may play a role in development of the central nervous system |
| <a href="#">RHOC</a>   | 0.30 | 2.7E-05 | Ras Homolog Family Member C                        | Cytoskeletal signaling                 | Small G protein; overexpressed in cancer                                                     |
| <a href="#">MCAM</a>   | 0.30 | 3.0E-04 | Melanoma Cell Adhesion Molecule                    | Cell adhesion                          |                                                                                              |
| <a href="#">MMP14</a>  | 0.28 | 1.0E-08 | Matrix Metalloproteinase 14                        | Matrix metalloproteinase               | Membranal MMP; activates MMP2; endopeptidase                                                 |
| <a href="#">MAMLD1</a> | 0.28 | 2.9E-04 | Mastermind Like Domain Containing 1                | Transcription                          | Transcriptional co-activator                                                                 |
| <a href="#">PTPN11</a> | 0.27 | 2.5E-08 | Protein Tyrosine Phosphatase, Non-Receptor Type 11 | Signal transduction                    | Shp2; tyrosine phosphatase                                                                   |

|                        |      |         |                                                        |                               |                                                                                                               |
|------------------------|------|---------|--------------------------------------------------------|-------------------------------|---------------------------------------------------------------------------------------------------------------|
| <a href="#">CLDN6</a>  | 0.27 | 1.6E-05 | Claudin 6                                              | Cytoskeleton scaffold protein | The protein is an integral membrane protein and is one of the entry cofactors for hepatitis C virus           |
| <a href="#">MAPK7</a>  | 0.26 | 5.1E-04 | Mitogen-Activated Protein Kinase 7                     | Signal transduction           | Proliferation, differentiation and cell survival                                                              |
| <a href="#">INSR</a>   | 0.25 | 1.3E-08 | Insulin Receptor                                       | Metabolism                    | RTK                                                                                                           |
| <a href="#">JUND</a>   | 0.25 | 1.4E-04 | Jun D Proto-Oncogene                                   | Transcription                 | Component of transcription factor complex (AP1)                                                               |
| <a href="#">MAP3K2</a> | 0.24 | 3.8E-04 | Mitogen-Activated Protein Kinase Kinase Kinase 2       | Signal transduction           | Serine/threonine kinase                                                                                       |
| <a href="#">FERMT2</a> | 0.24 | 2.6E-04 | Fermitin Family Member 2                               | Cytoskeletal signaling        | Scaffold protein                                                                                              |
| <a href="#">FOXO1</a>  | 0.22 | 6.5E-05 | Forkhead Box O1                                        | Transcription                 | Transcription factor; triggers apoptosis genes                                                                |
| <a href="#">PXN</a>    | 0.22 | 3.0E-05 | Paxillin                                               | Cytoskeletal signaling        | Cell migration; focal adhesions                                                                               |
| <a href="#">SETD2</a>  | 0.21 | 7.6E-07 | SET Domain Containing 2                                | Epigenetic regulation         | Histone methyltransferase                                                                                     |
| <a href="#">ZDHHC7</a> | 0.21 | 1.1E-05 | Zinc Finger DHHC-Type Containing 7                     | Metabolism                    |                                                                                                               |
| <a href="#">ARF6</a>   | 0.21 | 1.0E-05 | ADP Ribosylation Factor 6                              | Vesicular transport           | Small G protein                                                                                               |
| <a href="#">FUT8</a>   | 0.20 | 2.0E-03 | Fucosyltransferase 8                                   | Metabolism                    |                                                                                                               |
| <a href="#">IL6R</a>   | 0.20 | 2.7E-04 | Interleukin 6 Receptor                                 | Cell surface receptor         | Immune cell signaling; cytokine signaling                                                                     |
| <a href="#">ROCK1</a>  | 0.20 | 1.5E-03 | Rho Associated Coiled-Coil Containing Protein Kinase 1 | Cytoskeletal signaling        | Serine/threonine kinase of Rho                                                                                |
| <a href="#">BCL2L1</a> | 0.18 | 1.0E-04 | BCL2 Like 1                                            | Apoptosis                     | Inhibitor of apoptosis                                                                                        |
| <a href="#">CD9</a>    | 0.17 | 4.0E-02 | CD9 Molecule                                           | Cell adhesion                 |                                                                                                               |
| <a href="#">TJP1</a>   | 0.16 | 4.3E-03 | Tight Junction Protein 1                               | Cell-cell adhesion            | Plays a role in the regulation of cell migration by targeting CDC42BPB to the leading edge of migrating cells |

|                         |      |         |                                                    |                                      |                                                                                                                 |
|-------------------------|------|---------|----------------------------------------------------|--------------------------------------|-----------------------------------------------------------------------------------------------------------------|
| <a href="#">LGALS3</a>  | 0.16 | 2.5E-02 | Lectin, Galactoside Binding Soluble 3              | Cell adhesion                        | Lectin; may mediate with the alpha-3, beta-1 integrin the stimulation by CSPG4 of endothelial cells migration   |
| <a href="#">RAP1GAP</a> | 0.15 | 1.6E-02 | RAP1 GTPase Activating Protein                     | Signal transduction                  | GAP of Rap1                                                                                                     |
| <a href="#">ABL1</a>    | 0.15 | 3.8E-03 | ABL Proto-Oncogene 1, Non-Receptor Tyrosine Kinase | Cytoskeletal signaling               | NRTK                                                                                                            |
| <a href="#">NOTCH1</a>  | 0.14 | 4.3E-02 | Notch 1                                            | Signal transduction                  | Differentiation, proliferation and apoptotic signaling                                                          |
| <a href="#">PTGER4</a>  | 0.14 | 4.0E-02 | Prostaglandin E Receptor 4                         | Metabolism                           | GPCR                                                                                                            |
| <a href="#">SRC</a>     | 0.14 | 3.1E-02 | SRC Proto-Oncogene, Non-Receptor Tyrosine Kinase   | Signal transduction                  | NRTK                                                                                                            |
| <a href="#">NDRG1</a>   | 0.13 | 3.6E-02 | N-Myc Downstream Regulated 1                       | Signal transduction                  | Involved in stress responses, hormone responses, cell growth, and differentiation                               |
| <a href="#">HIF1A</a>   | 0.13 | 1.3E-03 | Hypoxia Inducible Factor 1 Alpha Subunit           | Transcription                        | Transcription regulation; adaptation to hypoxia; angiogenesis related                                           |
| <a href="#">BRAF</a>    | 0.13 | 3.6E-02 | B-Raf Proto-Oncogene, Serine/Threonine Kinase      | Signal transduction                  | Serine/threonine kinase, MAPK pathway; proliferation and differentiation                                        |
| <a href="#">BAMBI</a>   | 0.13 | 2.3E-02 | BMP And Activin Membrane-Bound Inhibitor           | Signal transduction                  | Negatively regulates TGF-beta signaling                                                                         |
| <a href="#">TP53</a>    | 0.13 | 5.7E-03 | Tumor Protein P53                                  | Cell cycle                           | Tumor suppressor; induces growth arrest or apoptosis depending on the physiological circumstances and cell type |
| <a href="#">CRK</a>     | 0.12 | 1.3E-02 | V-Crk Avian Sarcoma Virus CT10 Oncogene Homolog    | cytoskeletal signaling               | Adaptor protein                                                                                                 |
| <a href="#">CDKN1B</a>  | 0.12 | 1.2E-02 | Cyclin-Dependent Kinase Inhibitor 1B               | Cell cycle                           | Cyclin-dependent kinase inhibitor                                                                               |
| <a href="#">ADAM17</a>  | 0.12 | 3.1E-02 | ADAM Metalloproteinase Domain 17                   | Matrix metalloproteinase             |                                                                                                                 |
| <a href="#">KEAP1</a>   | 0.10 | 4.6E-02 | Kelch Like ECH Associated Protein 1                | Protein ubiquitination               | E3 ligase                                                                                                       |
| <a href="#">SNX9</a>    | 0.09 | 4.9E-02 | Sorting Nexin 9                                    | Vesicular transport/actin remodeling | Works with dynamin 1 among others                                                                               |

|                      |      |         |           |               |                                                                                                          |
|----------------------|------|---------|-----------|---------------|----------------------------------------------------------------------------------------------------------|
| <a href="#">SOX4</a> | 0.08 | 3.3E-03 | SRY-Box 4 | Transcription | Transcriptional activator; regulation of embryonic development and in the determination of the cell fate |
|----------------------|------|---------|-----------|---------------|----------------------------------------------------------------------------------------------------------|
