# Supplementary material for: Hepatitis C Virus Enhances the Invasiveness of Hepatocellular Carcinoma via EGFR-Mediated Invadopodia Formation and Activation
Source: MDPI journal article supplement (doi:10.3390/cells8111395), 2019-11-05
Supplement: s1 [file s1]

**Supplementary Table 1. Quantitative real-time PCR primers.**

**SYBR Green Primers**

| Target gene                        | Forward                            | Reverse                       |
|------------------------------------|------------------------------------|-------------------------------|
| Human $\beta$ -actin               | 5'-CTGTTTTGTGGCTTGTTTCAG-3'        | 5'-AGGAAACCTTCCCTCCTCTA-3'    |
| Mouse $\beta$ -2-microglobulin b2m | 5'-TTGGTTGAGAAGCAGAAACA-3'         | 5'-CACACAGTCAAGTCCCAAA-3'     |
| <i>GAPDH</i>                       | 5'-GAAGGTGAAGTCCGAGTC-3'           | 5'-GAAGATGGTGATGGGATTTC-3'    |
| <i>SLC9A1</i>                      | 5'-CCCAGGATTGTGCAATAGTC-3'         | 5'-GTACGTGGTTGTCGATGTCA-3'    |
| <i>ROCK</i>                        | 5'-CTGCTGGTGCTGGTAAGAGG-3'         | 5'-ATCCATCCAGCAAACAATCCGA-3'  |
| Hepatitis C 3' UTR                 | 5'-GCCATGGCGTTAGTATGAGTGT-3'       | 5'-CCCTATCAGGCAGTACCACAA-3'   |
| <i>N-WASP</i>                      | 5'-AAGAGATTAACCAAGGGAGATATAGGAA-3' | 5'-CCAACCAACATGTCCAATGTG-3'   |
| <i>Arp2/3</i>                      | 5'-CCAGGTTGTGGAACGACACA-3'         | 5'-GCTGATGGTCACAGGTTGTAACA-3' |
| <i>CTTN</i>                        | 5'-GGATGGATAAGAATGCGTCAAC-3'       | 5'-GTTACTTGTTTTGCTGGTCACAG-3' |
| <i>Tks5</i>                        | 5'-CCACATCCGGGACGTAGCT-3'          | 5'-CCTCGAAGAACCGGAAGACTT-3'   |
| <i>MT1-MMP</i>                     | 5'-GCCCATTGGCCAGTTCTGGCCGG-3'      | 5'-CCTCGTCCACCTCAATGATGATC-3' |
| <i>SRC</i>                         | 5'-CCTCCCGCACCCAGTTC-3'            | 5'-CATCGGCGTGTTTGGAGTAGT-3'   |

## TaqMan Primers

| Target gene   | Assay Name                     | Ref. Seq. Number |
|---------------|--------------------------------|------------------|
| <i>MMP14</i>  | ( <i>Hs.PT.58.39918453</i> )   | NM_004995        |
| <i>SRC</i>    | ( <i>Hs.PT.58.19132577</i> )   | NM_198291        |
| <i>EGR1</i>   | ( <i>Hs.PT.58.40805543.g</i> ) | NM_001964        |
| <i>SYNJ2</i>  | ( <i>Hs.PT.58.39211281</i> )   | NM_003898        |
| <i>RHOC</i>   | ( <i>Hs.PT.56a.21416046</i> )  | NM_175744        |
| <i>SLC9A1</i> | ( <i>Hs.PT.58.15072523</i> )   | NM_003047        |
| <i>SVIL</i>   | ( <i>Hs.PT.58.3928007</i> )    | NM_003174        |
| <i>CTTN</i>   | ( <i>Hs.PT.58.707045</i> )     | NM_138565        |
| <i>GAPDH</i>  | ( <i>Hs.PT.39a.22214836</i> )  | NM_002046        |
