# Supplementary figures and images for: Hepatitis C Virus Enhances the Invasiveness of Hepatocellular Carcinoma via EGFR-Mediated Invadopodia Formation and Activation
Source: MDPI journal article supplement (doi:10.3390/cells8111395), 2019-11-05

**A**

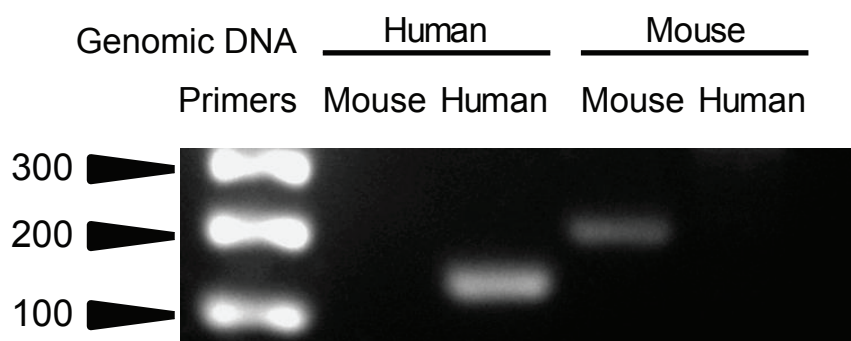

# B

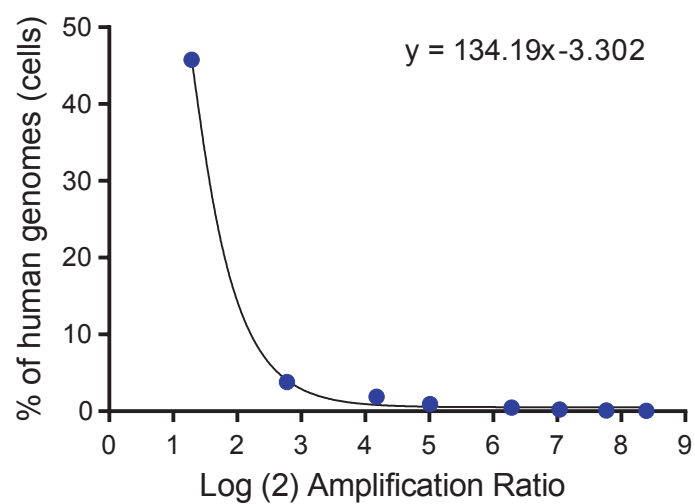

C

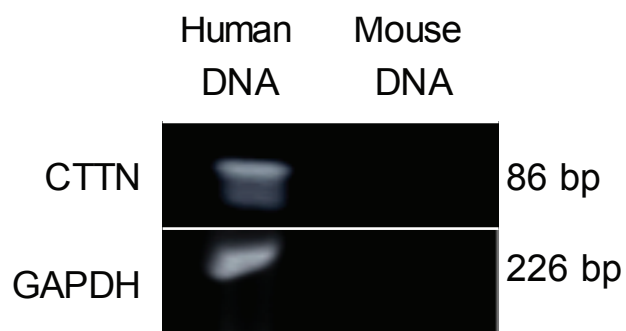

## D

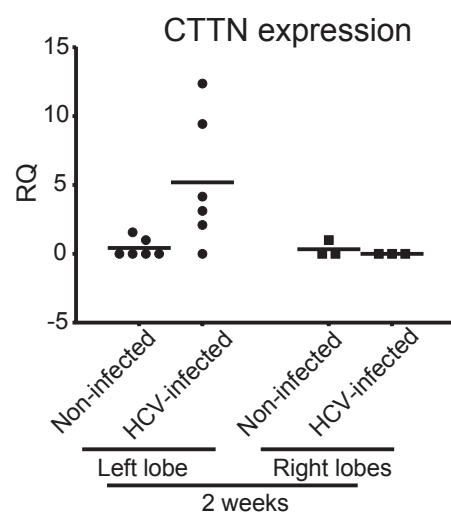

Supplement: s1 [file s1]

# Supplementary Figure 3

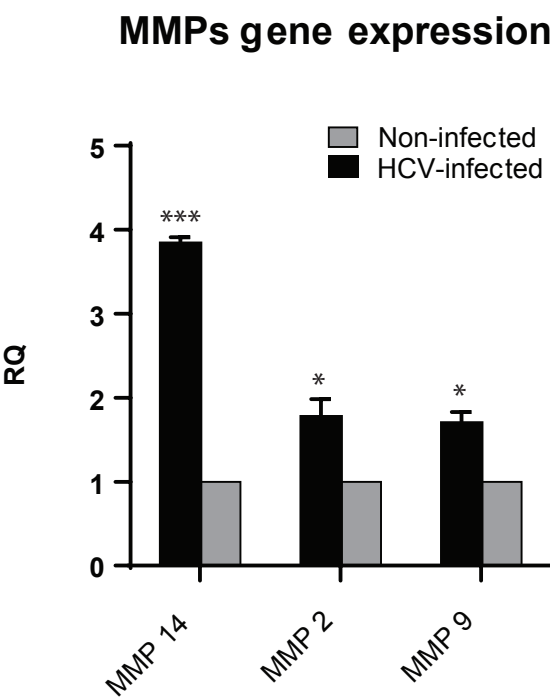

Supplement: s1 [file s1]

# Supplementary Figure 4

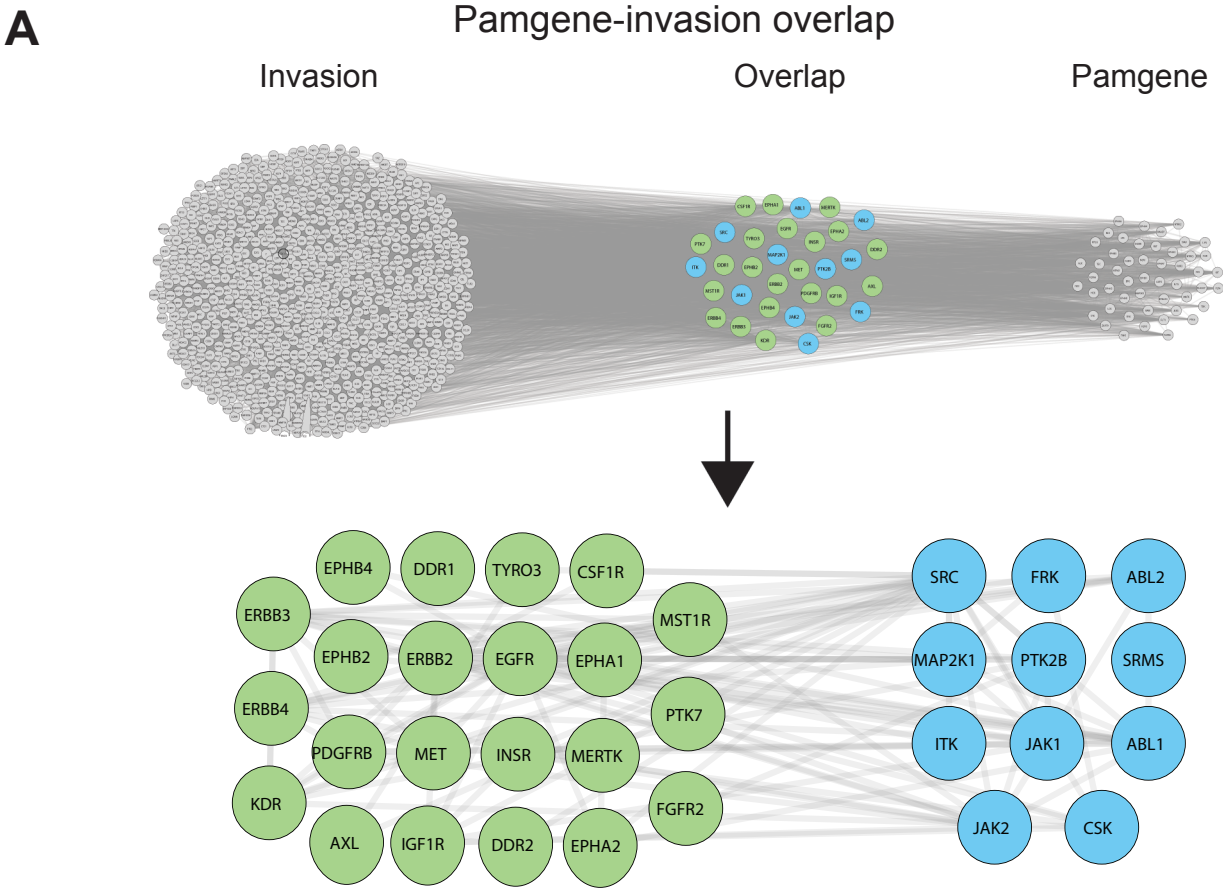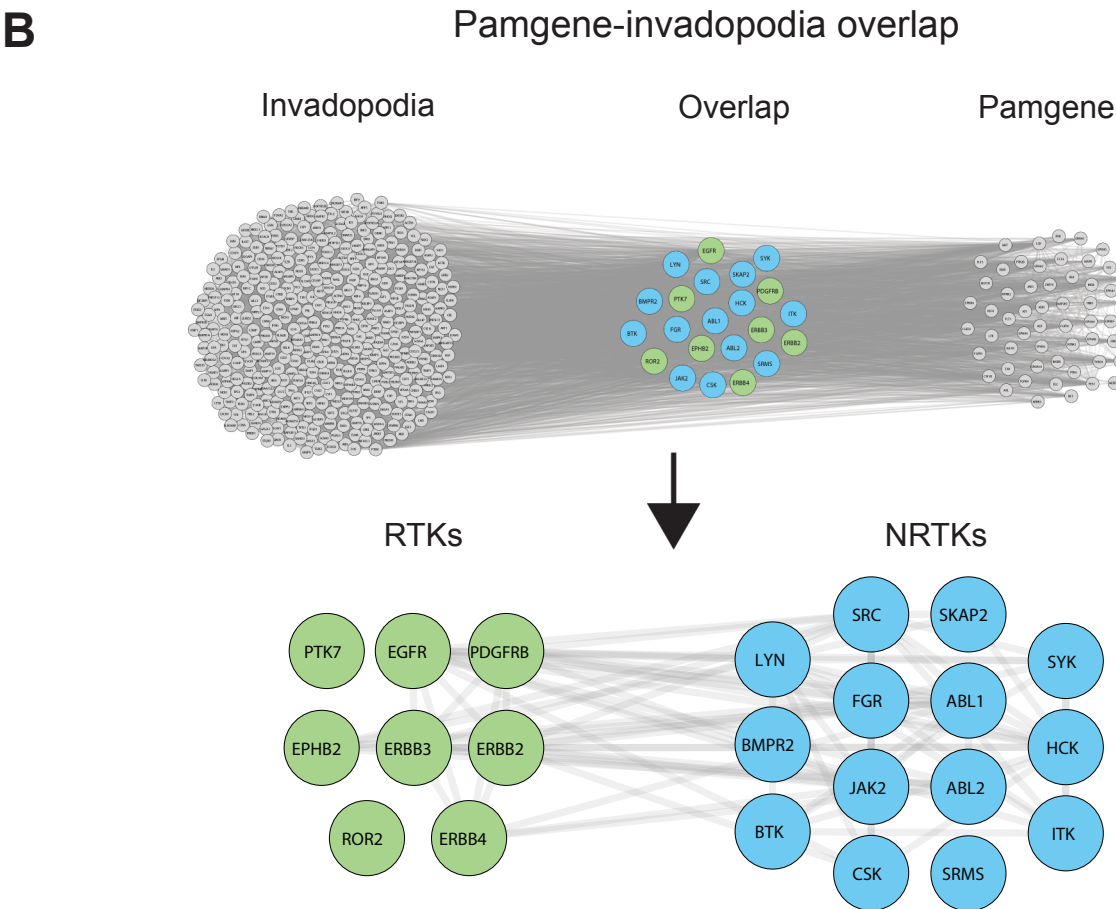

Supplement: s1 [file s1]

# Supplementary Figure 1

Non-infected

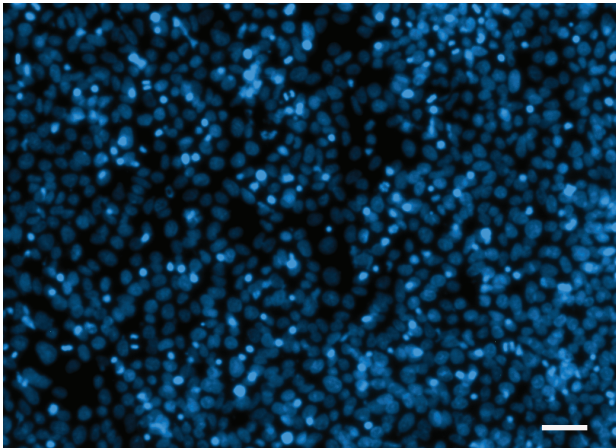

HCV-infected

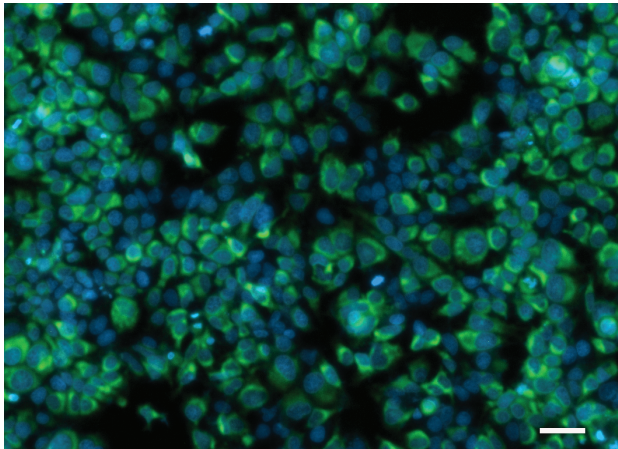

Supplement: s1 [file s1]

# Supplementary Figure 2

**A**

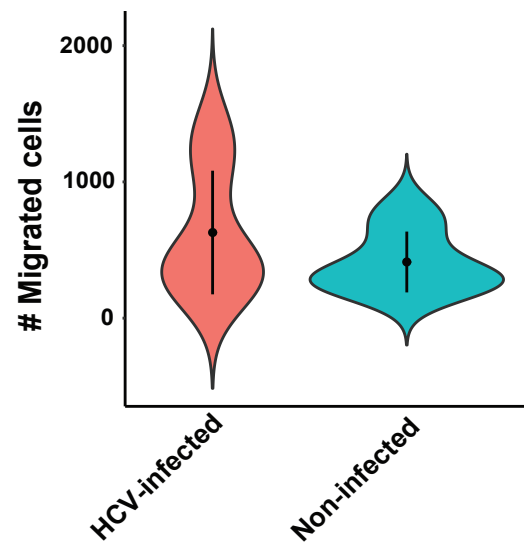

**B**

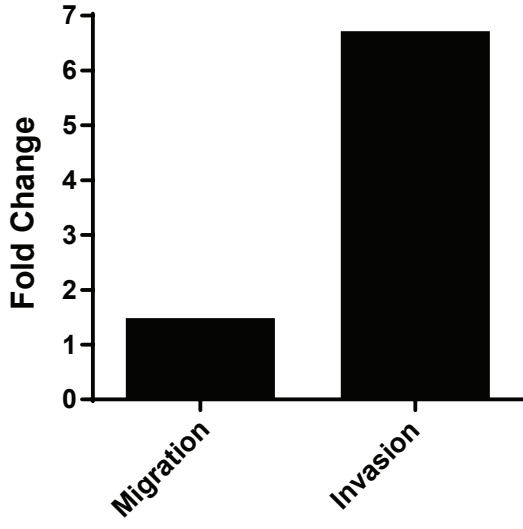

Supplement: s1 [file s1]
